# Supplementary material for: Bacterial Genome Wide Association Studies (bGWAS) and Transcriptomics Identifies Cryptic Antimicrobial Resistance Mechanisms in Acinetobacter baumannii
Source: Front Public Health. 2020 Sep 2;8:451. doi: 10.3389/fpubh.2020.00451 (PMC7493718; doi:10.3389/fpubh.2020.00451)
Supplement: Table S5 — The distribution of CARD genes against paired isolate genomes. [file Table_5.xlsx]

## Sheet: Sheet1
Table S5: The distribution of CARD genes against paired isolate genomes
TG22182	TG22627	TG31986	TG31302	TG29392	TG31307	TG22653	TG60155		Gene	Annotation
1	1	0	0	0	0	1	1	ARO:3002660	APH(6)-Id	APH(6)-Id is an aminoglycoside phosphotransferase encoded by plasmids, integrative conjugative elements and chromosomal genomic islands in K. pneumoniae, Salmonella spp., E. coli, Shigella flexneri, Providencia alcalifaciens, Pseudomonas spp., V. cholerae, Edwardsiella tarda, Pasteurella multocida and Aeromonas bestiarum
0	0	1	1	1	1	0	0	ARO:3000230	ANT(2'')-Ia	Plasmid or integron-encoded nucleotidylylation of 2-deoxystreptamine aminoglycosides at the hydroxyl group at position 2'' in P. aeruginosa, K. pneumoniae, Morganella morganii, E. coli, S. typhimurium, C. freundii and A. baumannii
0	0	1	1	1	1	0	0	ARO:3002244	CARB-5	CARB-5 is a beta-lactamase found in Acinetobacter calcoaceticus
0.13	0.13	1	1	1	1	0.13	0.13	ARO:3002705	floR	floR is a plasmid or chromosome-encoded chloramphenicol exporter that is found in Bordetella bronchiseptica, Escherichia coli, Klebsiella pneumoniae,
1	1	1	1	1	1	0.49	0.23	ARO:3000412	sul2	Sul2 is a sulfonamide resistant dihydropteroate synthase of Gram-negative bacteria, usually found on small plasmids.
0	0	1	1	1	1	0	0	ARO:3002247	CARB-8	CARB-8 is a beta-lactamase found in Oligella urethralis
0	0	0	0	0	0	1	0	ARO:3003676	AAC(6')-Ib'	AAC(6')-Ib' is an aminoglycoside acetyltransferase encoded by plasmids, transposons, integrons in P. aeruginosa and P. fluorescens.
1	0.98	0	0	0	0	0	0	ARO:3002365	PER-3	PER-3 is a beta-lactamase found in Aeromonas spp.
0.58	0.58	0.59	0.59	0.59	0.59	1	1	ARO:3001418	OXA-23	OXA-23 is a beta-lactamase found in A. baumannii
0.58	0.58	0.58	0.58	0.58	0.58	1	1	ARO:3001785	OXA-73	OXA-73 is a beta-lactamase found in Klebsiella pneumonia
1	0.98	0	0	0	0	0	0	ARO:3002366	PER-4	PER-4 is a beta-lactamase. From the Lahey list of PER beta-lactamases.
1	1	0	0	0	0	1	0	ARO:3000858	armA	ArmA is a 16S rRNA methyltransferase that targets mature or nearly mature 30S subunits. It transfers a methyl group from S-adenosyl-L-methionine to N7-G1405 of the 16S rRNA, an aminoglycoside binding site.
1	1	0.48	0.48	0.48	0.48	1	0	ARO:3000410	sul1	Sul1 is a sulfonamide resistant dihydropteroate synthase of Gram-negative bacteria. It is linked to other resistance genes of class 1 integrons.
0.58	0.58	0.58	0.58	0.58	0.58	1	1	ARO:3001493	OXA-225	OXA-225 is a beta-lactamase. From the Lahey list of OXA beta-lactamases.
0	0	1	1	1	1	0	0	ARO:3002252	CARB-14	CARB-14 is a beta-lactamase found in Acinetobacter baumannii
1	1	0	0	0	0	1	0.59	ARO:3003741	mphD	The mphD gene codes for a macrolide 2'-phosphotransferase partial sequence detected in Pseudomonas aeruginosa that provides a high level of resistance to all 14- and 15-membered-ring macrolides.
1	0.98	0	0	0	0	0	0	ARO:3002363	PER-1	PER-1 is a beta-lactamase found in Pseudomonas aeruginosa
1	1	0	0	0	0	1	1	ARO:3003479	tetR	TetR is the repressor of the tetracycline resistance element; its N-terminal region forms a helix-turn-helix structure and binds DNA. Binding of tetracycline to TetR reduces the repressor affinity for the tetracycline resistance gene (tetA) promoter operator sites. Mutations arise within tetR results in lower affinity for tetracyclin
1	0	1	1	1	1	0	0	ARO:3002641	APH(3')-Ia	APH(3')-Ia is a transposon-encoded aminoglycoside phosphotransferase in E. coli and S. enterica. It is identical at the protein sequence to APH(3')-Ic, an aminoglycoside phosphotransferase encoded by plasmids, transposons and genomic islands in K. pneumoniae, A. baumannii, S. marcescens, Corynebacterium spp., Photobacterium spp. and Citrobacter spp.
0	0	1	1	1	1	0	0	ARO:3002255	CARB-16	CARB-16 is a beta-lactamase. From the Lahey list of IMP beta-lactamases.
1	1	0.31	0.31	0.31	0.31	1	1	ARO:3000165	tet(A)	TetA is a tetracycline efflux pump found in many species of Gram-negative bacteria.
0.33	0.33	0.33	0.33	0.33	0.33	1	0.33	ARO:3002680	catB8	catB8 is a plasmid or integron-encoded variant of the cat gene found in Klebsiella pneumoniae, Salmonella typhi and Pseudomonas aeruginosa
1	1	0.16	0.16	0.16	0.16	1	0.16	ARO:3003109	msrE	MsrE is an ABC-efflux pump expressed to Klebsiella pneumoniae that confers resistance to erythromycin and streptogramin B antibiotics. It is associated with plasmid DNA. It is also 100% identical to ABC-F type ribosomal protection protein Msr(E) which is in multiple species.
0.58	0.58	0.59	0.59	0.59	0.59	0.99	0.99	ARO:3001422	OXA-27	OXA-27 is a beta-lactamase found in A. baumannii
0	0	0	0	0	0	0.99	0	ARO:3002577	AAC(6')-Ib4	AAC(6')-Ib4 is an aminoglycoside acetyltransferase in Serratia spp.
0.57	0.57	0.57	0.57	0.57	0.57	0.99	0.99	ARO:3001671	OXA-49	OXA-49 is a beta-lactamase found in A. baumannii
0.99	0.99	0	0	0	0	0.99	0.99	ARO:3002639	APH(3'')-Ib	APH(3'')-Ib is an aminoglycoside phosphotransferase encoded by plasmids, transposons, integrative conjugative elements and chromosomes in Enterobacteriaceae and Pseudomonas spp.
0.57	0.57	0.58	0.58	0.58	0.58	0.99	0.99	ARO:3001779	OXA-146	OXA-146 is a beta-lactamase found in Enterobacteriaceae
0	0	0.99	0.99	0.99	0.99	0	0	ARO:3002249	CARB-10	CARB-10 is a beta-lactamase found in Acinetobacter baumannii
0	0	0	0	0	0	0.99	0	ARO:3002592	AAC(6')-Ib-Hangzhou	AAC(6')-Ib-Hangzhou is an aminoglycoside acetyltransferase in A. baumannii
0.99	0.98	0	0	0	0	0	0	ARO:3002367	PER-5	PER-5 is a beta-lactamase found in the Enterobacteriaceae family
0.99	0.98	0	0	0	0	0	0	ARO:3002369	PER-7	PER-7 is a beta-lactamase found in Acinetobacter baumannii
0.58	0.58	0.58	0.58	0.58	0.58	0.99	0.99	ARO:3001498	OXA-239	OXA-239 is a beta-lactamase. From the Lahey list of OXA beta-lactamases.
0	0	0	0	0	0	0.99	0	ARO:3002548	AAC(6')-IId	AAC(6')-IId is an integron-encoded aminoglycoside acetyltransferase in P. aeruginosa, E. cloacae, and C. freundii.
0.58	0.58	0.58	0.58	0.58	0.58	0.99	0.99	ARO:3003160	OXA-422	From the Lahey list of beta-lactamases.
0.99	0.99	0.31	0.31	0.31	0.31	0.99	0.99	ARO:3000166	tet(B)	Tet(B) is a tetracycline efflux protein expressed in many Gram-negative bacteria. It confers resistance to tetracycline, doxycycline, and minocycline, but not tigecycline.
0.3	0.3	0.31	0.31	0.31	0.31	0.98	0.3	ARO:3002621	aadA24	aadA24 is an integron-encoded aminoglycoside nucleotidyltransferase gene in Salmonella spp.
0	0	0	0	0	0	0.98	0	ARO:3002591	AAC(6')-Ib-Suzhou	AAC(6')-Ib-Suzhou is an aminoglycoside acetyltransferase in E. cloacae and K. pneumoniae
0.57	0.57	0.58	0.58	0.58	0.58	0.98	0.98	ARO:3001702	OXA-133	OXA-133 is a beta-lactamase found in A. radioresistens
0	0	0	0	0	0	0.98	0	ARO:3002576	AAC(6')-Ib3	AAC(6')-Ib3 is an integron-encoded aminoglycoside acetyltransferase in P. aeruginosa
0	0	0	0	0	0	0.98	0	ARO:3002546	AAC(6')-Ib	AAC(6')-Ib is an aminoglycoside acetyltransferase encoded by plasmids, transposons, integrons in K. pneumoniae, P. mirabilis, P. aeruginosa, S. enterica, K. oxytoca, S. maltophilia, E. cloacae and V. cholerae
0.3	0.3	0.3	0.3	0.3	0.3	0.98	0.3	ARO:3002601	aadA	ANT(3'')-Ia is an aminoglycoside nucleotidyltransferase gene encoded by plasmids, transposons, integrons in Enterobacteriaceae, A. baumannii, P. aeruginosa and Vibrio cholerae
0	0	0	0	0	0	0.97	0	ARO:3002581	AAC(6')-Ib10	AAC(6')-Ib10 is an integron-encoded aminoglycoside acetyltransferase in P. aeruginosa
0	0	0	0	0	0	0.97	0	ARO:3002580	AAC(6')-Ib9	AAC(6')-Ib9 is an integron-encoded aminoglycoside acetyltransferase in P. aeruginosa
0.3	0.3	0.31	0.31	0.31	0.31	0.97	0.3	ARO:3002620	aadA23	aadA23 is an integron-encoded aminoglycoside nucleotidyltransferase gene in S. enterica
0.3	0.3	0.3	0.3	0.3	0.3	0.96	0.3	ARO:3002618	aadA21	aadA21 is an integron-encoded aminoglycoside nucleotidyltransferase gene in Salmonella spp.
0.64	0.96	0.6	0.6	0.6	0.6	0.96	0.96	ARO:3000549	adeS	AdeS is a sensor kinase in the AdeRS regulatory system of AdeABC. It is essential for AdeABC expression.
0.3	0.3	0.3	0.3	0.3	0.3	0.96	0.3	ARO:3002619	aadA22	aadA22 is an aminoglycoside nucleotidyltransferase gene encoded by plasmids and integrons in S. enterica and E. coli
0	0	0	0	0	0	0.95	0	ARO:3002582	AAC(6')-Ib11	AAC(6')-Ib11 is an integron-encoded aminoglycoside acetyltransferase in S. enterica
0	0	0	0	0	0	0.95	0	ARO:3002547	AAC(6')-Ib-cr	AAC(6')-Ib-cr is an aminoglycoside acetyltransferase encoded by plasmids, transposons, integrons in Enterobacteriaceae. The aac(6')-Ib-cr variant gene can induce resistance against aminoglycoside and fluoroquinolone simultaneously
0.3	0.3	0.3	0.3	0.3	0.3	0.94	0.3	ARO:3002615	aadA15	aadA15 is an integron-encoded aminoglycoside nucleotidyltransferase gene in P. aeruginosa
0.3	0.3	0.3	0.3	0.3	0.3	0.92	0.3	ARO:3002612	aadA12	aadA12 is an integron-encoded aminoglycoside nucleotidyltransferase gene in E. coli, Yersinia enterocolitica and S. enterica
0.29	0.29	0.29	0.29	0.29	0.29	0.92	0.29	ARO:3003197	aadA25	streptomycin/spectinomycin resistance gene found in Pasteurella multocida isolated from bovine respiratory tract
0.33	0.33	0.32	0.32	0.32	0.32	0.92	0.33	ARO:3002678	catB6	catB6 is a plasmid-encoded variant of the cat gene found in Pseudomonas aeruginosa
0.32	0.32	0.32	0.32	0.32	0.32	0.92	0.32	ARO:3002676	catB3	catB3 is a plasmid or chromosome-encoded variant of the cat gene found in Salmonella typhimurium, Acinetobacter baumannii and Escherichia coli
0.3	0.3	0.3	0.3	0.3	0.3	0.91	0.3	ARO:3002608	aadA8	aadA8 is an aminoglycoside nucleotidyltransferase gene encoded by plasmids and integrons in V. cholerae, K. pneumoniae and Bacillus endophyticus
0.31	0.31	0.31	0.31	0.31	0.31	0.91	0.31	ARO:3002617	aadA17	aadA17 is an integron-encoded aminoglycoside nucleotidyltransferase gene in Aeromonas media
0.31	0.31	0.31	0.31	0.31	0.31	0.9	0.31	ARO:3002603	aadA3	aadA3 is an aminoglycoside nucleotidyltransferase gene encoded by plasmids, transposons and integrons in E. coli
0.3	0.3	0.31	0.31	0.31	0.31	0.9	0.3	ARO:3002611	aadA11	aadA11 is an integron-encoded aminoglycoside nucleotidyltransferase gene in E. coli and P. aeruginosa
