# Supplementary material for: Bacterial Genome Wide Association Studies (bGWAS) and Transcriptomics Identifies Cryptic Antimicrobial Resistance Mechanisms in Acinetobacter baumannii
Source: Front Public Health. 2020 Sep 2;8:451. doi: 10.3389/fpubh.2020.00451 (PMC7493718; doi:10.3389/fpubh.2020.00451)
Supplement: Table S6 — bGWAS associations between resistant and susceptible phenotypes. Differences in Kmer frequences were identified with a Mann-Whitney test with Bonferroni correction. [file Table_6.xlsx]

## Sheet: Sheet1
Table S6: bGWAS associations between resistant and susceptible phenotypes. Differences in Kmer frequences were identified with a Mann-Whitney test with Bonferroni correction.
Antimicrobial	Association type	Locus	Method	Locus tag	p-value	Protein Product
GEN	SNP	CP001172.2::27817	treeWAS	ABBFA_00021	<0.001	missense variant: Ribosomal RNA small subunit methyltransferase B
GEN	SNP	CP001172.2::3588551	treeWAS	ABBFA_03347	<0.001	synonymous variant: putative deferrochelatase/peroxidase YfeX
LVX	SNP	CP001172.2::1545555	treeWAS	ABBFA_01412	<0.001	synonymous variant: putative 3-phenylpropionic acid transporter
LVX	SNP	CP001172.2::3177116	treeWAS	ABBFA_02965	<0.001	synonymous variant: (S)-1-Phenylethanol dehydrogenase
CIP	Kmer/CDS	220 Kmer hits	Pyseer	ABBFA_01046	1.93099e-13	mbtB; Phenyloxazoline synthase MbtB					18.6819
CIP	Kmer/CDS	140 Kmer hits	Pyseer	ABBFA_02308	2.56547e-13	Inner membrane transport protein YnfM					18.1586
CIP	Kmer/CDS	588 Kmer hits	Pyseer	ABBFA_000802	4.47858e-13	Biofilm-associated protein					17.1746
CIP	Kmer/CDS	178 Kmer hits	Pyseer	ABBFA_01384	7.31791e-13	Magnesium-transporting ATPase					16.3516
CIP	Kmer/CDS	174 Kmer hits	Pyseer	ABBFA_00558	7.49963e-13	Viruelnce sensor protein BvgS precursor					16.3116
CIP	Kmer/CDS	99 Kmer hits	Pyseer	ABBFA_01183	8.90731e-13	Patatin-like phospholipase					16.0334
CIP	Kmer/CDS	51 Kmer hits	Pyseer	ABBFA_03260	1.10277e-12	murD					15.6946
CIP	Kmer/CDS	79 Kmer hits	Pyseer	ABBFA_01149	1.24241e-12	acyl-CoA dehydrogenase					15.5086
CIP	Kmer/CDS	45 Kmer hits	Pyseer	ABBFA_02703	1.41189e-12	hypothetical protein					15.3116
CIP	Kmer/CDS	196 Kmer hits	Pyseer	ABBFA_00395	1.41189e-12	tetracycline resistance protein					15.3116
GEN	Kmer/CDS	39 Kmer hits	Pyseer	ABBFA_03297	4.69566e-10	parC					8.56703
GEN	Kmer/CDS	24 Kmer hits	Pyseer	ABBFA_00332	2.00953e-09	hypothetical protein					7.40782
GEN	Kmer/CDS	34 Kmer hits	Pyseer	ABBFA_00073	2.06036e-09	Urocanate hydratase					7.38934
GEN	Kmer/CDS	8 Kmer hits	Pyseer	ABBFA_00022	2.22846e-09	methionyl-tRNA formyltransferase					7.33161
GEN	Kmer/CDS	6 Kmer hits	Pyseer	ABBFA_00393	2.32359e-09	glycine-tRNA ligase beta subunit					7.30103
GEN	Kmer/CDS	4 Kmer hits	Pyseer	ABBFA_00632	3.00456e-09	mutM					7.11577
GEN	Kmer/CDS	26 Kmer hits	Pyseer	ABBFA_00628	4.69566e-10	GTP-binding protein TypA/BipA					8.56703
GEN	Kmer/CDS	15 Kmer hits	Pyseer	ABBFA_00329	3.37112e-09	putative metal-dependent hydrolase					7.03433
GEN	Kmer/CDS	9 Kmer hits	Pyseer	ABBFA_00356	3.92507e-09	hypothetical protein					6.92812
GEN	Kmer/CDS	12 Kmer hits	Pyseer	ABBFA_02463	4.47e-09	lytic transglycosylase					6.83863
LVX	Kmer/CDS	160 Kmer hits	Pyseer	ABBFA_01412	2.90418e-15	MFS transporter					28.4248
LVX	Kmer/CDS	114 Kmer hits	Pyseer	ABBFA_02451	4.26438e-15	TonB-dependent receptor					27.3536
LVX	Kmer/CDS	20 Kmer hits	Pyseer	ABBFA_00615	5.30667e-15	qinoprotein glucose dehydrogenase					26.762
LVX	Kmer/CDS	317 Kmer hits	Pyseer	ABBFA_01865	4.86957e-14	heme-binding protein A precursor					21.4413
LVX	Kmer/CDS	100 Kmer hits	Pyseer	ABBFA_00724	2.04316e-13	valine-tRNA ligase					18.5768
LVX	Kmer/CDS	30 Kmer hits	Pyseer	ABBFA_03297	2.5847e-13	parC					18.1451
LVX	Kmer/CDS	77 Kmer hits	Pyseer	ABBFA_01316	2.90305e-13	translocation and assembly module TamB					17.9355
LVX	Kmer/CDS	64 Kmer hits	Pyseer	ABBFA_01754	2.90305e-13	GntR family transcriptional regulator					17.9355
LVX	Kmer/CDS	75 Kmer hits	Pyseer	ABBFA_03107	3.37469e-13	ribonuclease E					17.6676
LVX	Kmer/CDS	137 Kmer hits	Pyseer	ABBFA_01376	3.6879e-13	outer membrane protein W					17.5114
FEP	Kmer/CDS	9 Kmer hits	Pyseer	ABBFA_02980	1.74046e-10	peptide chain release factor 3					9.46092
FEP	Kmer/CDS	21 Kmer hits	Pyseer	ABBFA_02463	3.14563e-10	mltD					8.91721
FEP	Kmer/CDS	2 Kmer hits	Pyseer	ABBFA_02478	3.50599e-10	ubiH					8.82102
FEP	Kmer/CDS	4 Kmer hits	Pyseer	ABBFA_01806	4.30353e-10	hypothetical protein					8.64207
FEP	Kmer/CDS	42 Kmer hits	Pyseer	ABBFA_01014	4.61602e-10	Lon protease 2					8.5817
FEP	Kmer/CDS	54 Kmer hits	Pyseer	ABBFA_00369	6.90805e-10	putative inner membrane protein					8.2426
FEP	Kmer/CDS	2 Kmer hits	Pyseer	ABBFA_03112	7.81584e-10	short chain dehydrogenase					8.14146
FEP	Kmer/CDS	50 Kmer hits	Pyseer	ABBFA_00023	9.36368e-10	dihydroxy-acid dehydratase					7.99568
FEP	Kmer/CDS	15 Kmer hits	Pyseer	ABBFA_01695	1.11986e-09	porin PapC					7.85387
FEP	Kmer/CDS	8 Kmer hits	Pyseer	ABBFA_00199	1.2102e-09	4-aminobutyrate aminotransferase					7.79317
CAZ	Kmer/CDS	2 Kmer hits	Pyseer	ABBFA_00383	3.5174e-10	hypothetical protein					8.81816
CXM	Kmer/CDS	358 Kmer hits	Pyseer	ABBFA_00073	1.19287e-12	urocanate hydratase					15.5719
CXM	Kmer/CDS	3 Kmer hits	Pyseer	ABBFA_00476	1.00336e-11	hypothetical protein					12.585
CXM	Kmer/CDS	3 Kmer hits	Pyseer	ABBFA_001076	3.02963e-10	class C beta-lactamase					8.95078
CXM	Kmer/CDS	1 Kmer hits	Pyseer	ABBFA_00167	3.26991e-10	3-deoxy-D-manno-2-octulosonate transferase					8.88273
CXM	Kmer/CDS	1 Kmer hits	Pyseer	ABBFA_01821	2.32911e-09	ferric aerobactin receptor protein					7.2993
CIP	Kmers	AAATCTTTGTAAAAATGCTGT	Kmer	EA702_RS11760	2.57 E-13	magnesium-translocating P-type ATPase
FEP	Kmers	AGTCCTGAACATCATCCAGAT	Kmer	EA677_18295	2.18 E-11	phage tail tape measure protein
PIP	Kmers	GATTAGTGTGCAGCAGAAGCA	Kmer	EA677_15490	4.54 E-11	hypothetical_protein
PIP	Kmers	GAAATGATTGCACCAATTGAC	Kmer	EA686_14610	4.54 E-11	MFS_transporter
PIP	Kmers	ATATGGTTGGCAATTGTGGAA	Kmer	EA722_RS06585	4.54 E-11	outer_membrane_porin,_OprD_family
PIP	Kmers	CCAAAACCAGACCAGTCATTA	Kmer	EA686_06425	4.54 E-11	SfnB_family_sulfur_acquisition_oxidoreductase
PIP	Kmers	TAAGCTTAACTTATACTAAAA	Kmer	EA700_RS06205	4.54 E-11	hypothetical_protein
PIP	Kmers	ATATTATTAATGACTGGTCTG	Kmer	EA686_06425	4.54 E-11	SfnB_family_sulfur_acquisition_oxidoreductase
PIP	Kmers	AAAATTTTGACGGCATTGCAT	Kmer	EA722_RS15365	4.54 E-11	response_regulator
PIP	Kmers	AAATGGGCGGCGCTTATGTGC	Kmer	EA722_RS13040	4.54 E-11	3-hydroxyacyl-CoA_dehydrogenase
PIP	Kmers	AAAACATGGCTATCTCTAACA	Kmer	EA686_02525	4.54 E-11	bestrophin
PIP	Kmers	GGCGGCGCTTATGTGCTCCAA	Kmer	EA722_RS13040	4.54 E-11	3-hydroxyacyl-CoA_dehydrogenase
PIP	Kmers	AAACCAGACCAGTCATTAATA	Kmer	EA686_06425	4.54 E-11	SfnB_family_sulfur_acquisition_oxidoreductase
PIP	Kmers	ACCAATCATTAATAATATTGA	Kmer	EA722_RS00665	4.54 E-11	SfnB_family_sulfur_acquisition_oxidoreductase
PIP	Kmers	GATTGGTCTGGTTTTGGACAA	Kmer	EA722_RS00665	4.54 E-11	SfnB_family_sulfur_acquisition_oxidoreductase
PIP	Kmers	AATATTATTAATGACTGGTCT	Kmer	EA686_06425	4.54 E-11	SfnB_family_sulfur_acquisition_oxidoreductase
PIP	Kmers	AACATGGCTATCTCTAACAAT	Kmer	EA686_02525	4.54 E-11	bestrophin
PIP	Kmers	TAACGTTGGCCTTGCATGATA	Kmer	EA686_11365	4.54 E-11	peptidoglycan-binding_protein
PIP	Kmers	ATTCCTCAGAAGGAATGACTC	Kmer	EA722_RS11670	4.54 E-11	hypothetical_protein
PIP	Kmers	ATTGGTCTGGTTTTGGACAAC	Kmer	EA722_RS00665	4.54 E-11	SfnB_family_sulfur_acquisition_oxidoreductase
PIP	Kmers	AGACTTTAATGCAATGCCGTC	Kmer	EA722_RS15365	4.54 E-11	response_regulator
PIP	Kmers	ATGGTGTGTTTGTTCTTGTTG	Kmer	EA686_18325	4.54 E-11	aspartate_dehydrogenase
PIP	Kmers	TACAGGAAGTTTCGGGTTTGA	Kmer	EA722_RS12935	4.54 E-11	malonate_decarboxylase_holo-ACP_synthase
PIP	Kmers	GTGTGTTTGTTCTTGTTGATA	Kmer	EA686_18325	4.54 E-11	aspartate_dehydrogenase
PIP	Kmers	CCAATGGTTTACCTTGTTCAG	Kmer	EA722_RS05690	4.54 E-11	NAD-dependent_succinate-semialdehyde_dehydrogenase
PIP	Kmers	CTTGCCTCGTTTCGACTCGGC	Kmer	EA686_21450	4.54 E-11	glutamate_synthase_large_subunit
PIP	Kmers	AATATGGTTGGCAATTGTGGA	Kmer	EA722_RS06585	4.54 E-11	outer_membrane_porin,_OprD_family
PIP	Kmers	ACAGGAAGTTTCGGGTTTGAA	Kmer	EA722_RS12935	4.54 E-11	malonate_decarboxylase_holo-ACP_synthase
PIP	Kmers	ACGAATGGGTTAAATTCAACA	Kmer	EA686_10490	4.54 E-11	SDR_family_oxidoreductase
PIP	Kmers	GAAACGAGGCAAGATAGCTTC	Kmer	EA686_21450	4.54 E-11	glutamate_synthase_large_subunit
PIP	Kmers	CCTCAGAAGGAATGACTCTGA	Kmer	EA722_RS11670	4.54 E-11	hypothetical_protein
PIP	Kmers	ACCAGACCAGTCATTAATAAT	Kmer	EA686_06425	4.54 E-11	SfnB_family_sulfur_acquisition_oxidoreductase
PIP	Kmers	ATTAGTGTGCAGCAGAAGCAG	Kmer	EA677_15490	4.54 E-11	hypothetical_protein
PIP	Kmers	CTTTAATGCAATGCCGTCAAA	Kmer	EA722_RS15365	4.54 E-11	response_regulator
PIP	Kmers	GCTTAACTTATACTAAAAGAC	Kmer	EA700_RS06205	4.54 E-11	hypothetical_protein
PIP	Kmers	GATTGTAGACCGTAAGAAAAA	Kmer	EA722_RS13035	4.54 E-11	3-oxoadipyl-CoA_thiolase
PIP	Kmers	CTATTCCTCAGAAGGAATGAC	Kmer	EA722_RS11670	4.54 E-11	hypothetical_protein
PIP	Kmers	TTAACTTATACTAAAAGACAA	Kmer	EA700_RS06205	4.54 E-11	hypothetical_protein
PIP	Kmers	CTGCCGAGTCGAAACGAGGCA	Kmer	EA686_21450	4.54 E-11	glutamate_synthase_large_subunit
PIP	Kmers	GAACAAGGTAAACCATTGGCA	Kmer	EA722_RS05690	4.54 E-11	NAD-dependent_succinate-semialdehyde_dehydrogenase
PIP	Kmers	CCAGACATATTGTTAGAGATA	Kmer	EA686_02525	4.54 E-11	bestrophin
PIP	Kmers	ATGATTGGTCTGGTTTTGGAC	Kmer	EA722_RS00665	4.54 E-11	SfnB_family_sulfur_acquisition_oxidoreductase
PIP	Kmers	CAATATTATTAATGACTGGTC	Kmer	EA686_06425	4.54 E-11	SfnB_family_sulfur_acquisition_oxidoreductase
PIP	Kmers	TTTAATGCAATGCCGTCAAAA	Kmer	EA722_RS15365	4.54 E-11	response_regulator
PIP	Kmers	CAAATGGGCGGCGCTTATGTG	Kmer	EA722_RS13040	4.54 E-11	3-hydroxyacyl-CoA_dehydrogenase
PIP	Kmers	GAGATTGTAGACCGTAAGAAA	Kmer	EA722_RS13035	4.54 E-11	3-oxoadipyl-CoA_thiolase
PIP	Kmers	AGGGAAGTGCTCGATGTAGTA	Kmer	EA722_RS15315	4.54 E-11	amino_acid_ABC_transporter_ATP-binding_protein
PIP	Kmers	CCAGACCAGTCATTAATAATA	Kmer	EA686_06425	4.54 E-11	SfnB_family_sulfur_acquisition_oxidoreductase
PIP	Kmers	TGATCCAACTATCAACAAGAA	Kmer	EA686_18325	4.54 E-11	aspartate_dehydrogenase
PIP	Kmers	AGCACCCATCGCCCCCCATGC	Kmer	EA722_RS12220	4.54 E-11	acyl-CoA_dehydrogenase
PIP	Kmers	GCGGCGCTTATGTGCTCCAAA	Kmer	EA722_RS13040	4.54 E-11	3-hydroxyacyl-CoA_dehydrogenase
PIP	Kmers	AAATGATTGCACCAATTGACA	Kmer	EA686_14610	4.54 E-11	MFS_transporter
PIP	Kmers	CAATTGCCAACCATATTTTCA	Kmer	EA722_RS06585	4.54 E-11	outer_membrane_porin,_OprD_family
PIP	Kmers	GAGTCGAAACGAGGCAAGATA	Kmer	EA686_21450	4.54 E-11	glutamate_synthase_large_subunit
PIP	Kmers	ATCTTGCCTCGTTTCGACTCG	Kmer	EA686_21450	4.54 E-11	glutamate_synthase_large_subunit
PIP	Kmers	CAACGAATGGGTTAAATTCAA	Kmer	EA686_10490	4.54 E-11	SDR_family_oxidoreductase
PIP	Kmers	CCAAAACCAGACCAATCATTA	Kmer	EA722_RS00665	4.54 E-11	SfnB_family_sulfur_acquisition_oxidoreductase
PIP	Kmers	ATCCAACTATCAACAAGAACA	Kmer	EA686_18325	4.54 E-11	aspartate_dehydrogenase
PIP	Kmers	CAACTATCAACAAGAACAAAC	Kmer	EA686_18325	4.54 E-11	aspartate_dehydrogenase
PIP	Kmers	CAAAACCAGACCAGTCATTAA	Kmer	EA686_06425	4.54 E-11	SfnB_family_sulfur_acquisition_oxidoreductase
PIP	Kmers	AGGAATGACTCTGATGCGGGA	Kmer	EA722_RS11670	4.54 E-11	hypothetical_protein
PIP	Kmers	CCAACGAATGGGTTAAATTCA	Kmer	EA686_10490	4.54 E-11	SDR_family_oxidoreductase
PIP	Kmers	AATTGCCAACCATATTTTCAT	Kmer	EA722_RS06585	4.54 E-11	outer_membrane_porin,_OprD_family
PIP	Kmers	AGTACTACATCGAGCACTTCC	Kmer	EA722_RS15315	4.54 E-11	amino_acid_ABC_transporter_ATP-binding_protein
PIP	Kmers	AGACATATTGTTAGAGATAGC	Kmer	EA686_02525	4.54 E-11	bestrophin
PIP	Kmers	CAGTCAAAACCGAGTACACCA	Kmer	EA722_RS09325	4.54 E-11	fumarate_reductase/succinate_dehydrogenase_flavoprotein_subunit
PIP	Kmers	AATCATTAATAATATTGACCC	Kmer	EA722_RS00665	4.54 E-11	SfnB_family_sulfur_acquisition_oxidoreductase
PIP	Kmers	GCTGCTTCTGCTGCACACTAA	Kmer	EA677_15490	4.54 E-11	hypothetical_protein
PIP	Kmers	AACGTTGGCCTTGCATGATAT	Kmer	EA686_11365	4.54 E-11	peptidoglycan-binding_protein
PIP	Kmers	AATGGGCGGCGCTTATGTGCT	Kmer	EA722_RS13040	4.54 E-11	3-hydroxyacyl-CoA_dehydrogenase
PIP	Kmers	AACGAATGGGTTAAATTCAAC	Kmer	EA686_10490	4.54 E-11	SDR_family_oxidoreductase
PIP	Kmers	AACCCGAAACTTCCTGTATAT	Kmer	EA722_RS12935	4.54 E-11	malonate_decarboxylase_holo-ACP_synthase
PIP	Kmers	AATGATTGCACCAATTGACAT	Kmer	EA686_14610	4.54 E-11	MFS_transporter
PIP	Kmers	AAAACCAGACCAATCATTAAT	Kmer	EA722_RS00665	4.54 E-11	SfnB_family_sulfur_acquisition_oxidoreductase
PIP	Kmers	GGGGTCAATATTATTAATGAC	Kmer	EA686_06425	4.54 E-11	SfnB_family_sulfur_acquisition_oxidoreductase
PIP	Kmers	AATATCATGCAAGGCCAACGT	Kmer	EA686_11365	4.54 E-11	peptidoglycan-binding_protein
PIP	Kmers	ACAGTCAAAACCGAGTACACC	Kmer	EA722_RS09325	4.54 E-11	fumarate_reductase/succinate_dehydrogenase_flavoprotein_subunit
PIP	Kmers	ACCCATCGCCCCCCATGCAAT	Kmer	EA722_RS12220	4.54 E-11	acyl-CoA_dehydrogenase
PIP	Kmers	CCCGAAACTTCCTGTATATCC	Kmer	EA722_RS12935	4.54 E-11	malonate_decarboxylase_holo-ACP_synthase
PIP	Kmers	ATCTCTAACAATATGTCTGGC	Kmer	EA686_02525	4.54 E-11	bestrophin
PIP	Kmers	AGAGTCATTCCTTCTGAGGAA	Kmer	EA722_RS11670	4.54 E-11	hypothetical_protein
PIP	Kmers	TATCTCGAATAGAAATCCACA	Kmer	EA686_12560	4.54 E-11	sensor_histidine_kinase_KdpD
PIP	Kmers	GTGGATTTCTATTCGAGATAA	Kmer	EA686_12560	4.54 E-11	sensor_histidine_kinase_KdpD
PIP	Kmers	TCATGCAAGGCCAACGTTACA	Kmer	EA686_11365	4.54 E-11	peptidoglycan-binding_protein
PIP	Kmers	ATATTGTTAGAGATAGCCATG	Kmer	EA686_02525	4.54 E-11	bestrophin
CRO	Kmers	AGGCATCAACTACCTCTAATA	Kmer	EA722_RS05520	3.94 E-10	alkene_reductase
CRO	Kmers	AAAGTAAAATCTAACACCGTG	Kmer	EA686_00345	3.94 E-10	type_I_secretion_C-terminal_target_domain-containing_protein
CRO	Kmers	AAGTTTTTGTGTAATTTGCGC	Kmer	EA702_RS01610	3.94 E-10	type_II_toxin-antitoxin_system_HipA_family_toxin
CRO	Kmers	ATAGCAAGGCTCAACTGGAAA	Kmer	EA729_RS00435	3.94 E-10	methionine_ABC_transporter_ATP-binding_protein
CRO	Kmers	CTTTAACATCTGCAAGGTCAA	Kmer	EA722_RS02735	3.94 E-10	ATP-dependent_protease
CRO	Kmers	AACTTCAATTTGAGTATTTGC	Kmer	EA686_04220	3.94 E-10	type_I_secretion_protein
CRO	Kmers	AAAGCCTCTGGTGCATGAATA	Kmer	EA722_RS05525	3.94 E-10	3-deoxy-D-manno-octulosonic_acid_transferase
CRO	Kmers	GCTGGCTTGCTTCAAAAGGCC	Kmer	EA702_RS06585	3.94 E-10	MFS_transporter
CRO	Kmers	ATACCTATTTGATTTCAGAAA	Kmer	EA702_RS02750	3.94 E-10	IS21_family_transposase
CRO	Kmers	TCACTATTAATGGAGTACTCA	Kmer	EA702_RS06015	3.94 E-10	PAS_domain-containing_protein
CRO	Kmers	GAATTACTTGTTTGCCCAGCC	Kmer	EA686_06960	3.94 E-10	MerR_family_transcriptional_regulator
CRO	Kmers	AGCACTGCGTGAAGACCCTGA	Kmer	EA686_01375	3.94 E-10	twitching_motility_protein_PilT
CRO	Kmers	TAAAAGAGAGCTTTCTTGCAA	Kmer	#N/A	3.94 E-10	intergenic
CRO	Kmers	AAATGTACCGGCTCATTTAAA	Kmer	EA686_08390	3.94 E-10	sensor_domain-containing_diguanylate_cyclase
CRO	Kmers	AGCATAATGACCTGTTGCAAT	Kmer	EA686_00985	3.94 E-10	tRNA_2-thiouridine(34)_synthase_MnmA
CRO	Kmers	TATTGAGTTAGCCAAGAAAGA	Kmer	EA686_08200	3.94 E-10	RtcB_family_protein
CRO	Kmers	CTCCACCACAACCATTTAACA	Kmer	EA686_00540	3.94 E-10	protein_FilF
CRO	Kmers	ATTTTTGGATGATAAAGGCTG	Kmer	EA686_00535	3.94 E-10	putative_pilus_assembly_protein_FilE
CRO	Kmers	GGATATCTTTTGCATCGGAAC	Kmer	EA722_RS16140	3.94 E-10	taurine_ABC_transporter_substrate-binding_protein
CRO	Kmers	ACGAATTACTTGTTTGCCCAG	Kmer	EA686_06960	3.94 E-10	MerR_family_transcriptional_regulator
CRO	Kmers	ATAAACATAGAACTTAACCAA	Kmer	EA686_19205	3.94 E-10	glycosyltransferase_family_39_protein
CRO	Kmers	AGGCTTAAATCACATTCGCGA	Kmer	EA722_RS07900	3.94 E-10	bifunctional_tetrahydrofolate_synthase/dihydrofolate_synthase
CRO	Kmers	TCTTTACCCAATTGCTCGGCA	Kmer	EA722_RS17835	3.94 E-10	DUF885_domain-containing_protein
CRO	Kmers	ATGGTGTTGCAACATGCATTA	Kmer	EA722_RS13570	3.94 E-10	MFS_transporter
CRO	Kmers	AACAGACAGCGATATTTGTCG	Kmer	EA686_22625	3.94 E-10	DUF1989_domain-containing_protein
CRO	Kmers	CACAGACAGGAACAGGTAAGA	Kmer	EA686_16640	3.94 E-10	DEAD/DEAH_box_helicase
CRO	Kmers	GCGTTGTTTGCTGAGTTGGTA	Kmer	EA686_26415	3.94 E-10	succinate_dehydrogenase_assembly_factor_2
CRO	Kmers	ATCTTGCAGATGTTAAAGGTC	Kmer	EA686_08600	3.94 E-10	ATP-binding_protein
CRO	Kmers	ATGTTTACCTTGTAAAACGTG	Kmer	EA686_06000	3.94 E-10	UDP-N-acetylmuramate:L-alanyl-gamma-D-glutamyl-_meso-diaminopimelate_ligase
CRO	Kmers	TATCATCCAAAAATACAACGA	Kmer	EA686_00535	3.94 E-10	putative_pilus_assembly_protein_FilE
CRO	Kmers	AAAAATAGCCTTTTCTGAAAT	Kmer	EA703_RS10290	3.94 E-10	amino_acid_adenylation_domain-containing_protein
CRO	Kmers	ATCAAACCTAAAATGATGTCA	Kmer	EA686_17180	3.94 E-10	DMT_family_transporter
CRO	Kmers	CTTGAACCGATCTATACGGGA	Kmer	EA722_RS13320	3.94 E-10	1-aminocyclopropane-1-carboxylate_deaminase/D-cysteine_desulfhydrase
CRO	Kmers	ATTAGGTGCATGGATGGGGCC	Kmer	EA702_RS03160	3.94 E-10	prepilin_peptidase
CRO	Kmers	ATTTTTCAGTTCCCCTTTGTG	Kmer	EA686_11515	3.94 E-10	enoyl-CoA_hydratase
CRO	Kmers	ACAACTCGCGTGGAGTACGGC	Kmer	EA722_RS10070	3.94 E-10	flavodoxin
CRO	Kmers	AAAAATTAAAGTACTATTTGG	Kmer	EA686_00620	3.94 E-10	FKBP-type_peptidyl-prolyl_cis-trans_isomerase
CRO	Kmers	CCATGATAAGCAGCTGATTCA	Kmer	EA722_RS00190	3.94 E-10	phosphogluconate_dehydratase
CRO	Kmers	GTGAATACCGGTGGGCGCAAA	Kmer	EA702_RS01610	3.94 E-10	type_II_toxin-antitoxin_system_HipA_family_toxin
CRO	Kmers	CAACCATTTAACATCAATGCA	Kmer	EA686_00540	3.94 E-10	protein_FilF
CRO	Kmers	CAACCGTCAGTTGCAACCATA	Kmer	EA722_RS01485	3.94 E-10	1-(5-phosphoribosyl)-5-[(5-_phosphoribosylamino)methylideneamino]imidazole-4-_carboxamide_isomerase
CRO	Kmers	CCTGTAACAGCCGATTCATTA	Kmer	EA686_02925	3.94 E-10	K(+)-transporting_ATPase_subunit_B
CRO	Kmers	AGCTCAAAAATATGGTCGTAT	Kmer	EA702_RS08360	3.94 E-10	3-hydroxybutyrate_dehydrogenase
CRO	Kmers	GTAAAATTAGCTAATAATTGA	Kmer	#N/A	3.94 E-10	intergenic
CRO	Kmers	ATTTTTATCATTTTTGGGTAA	Kmer	EA722_RS02565	3.94 E-10	hypothetical_protein
CRO	Kmers	ATGCAACGGTAATGCATGTTG	Kmer	EA722_RS13570	3.94 E-10	MFS_transporter
CRO	Kmers	AATCGCATAAATAAACTTTGG	Kmer	EA702_RS06385	3.94 E-10	LTA_synthase_family_protein
CRO	Kmers	CTACTTCATTGTGTCTGCCGC	Kmer	EA722_RS13080	3.94 E-10	phenylacetic_acid_degradation_bifunctional_protein_PaaZ
CRO	Kmers	CATTGGTCACGGTTAGCCAGA	Kmer	EA686_10530	3.94 E-10	chromate_efflux_transporter
CRO	Kmers	AACTCCTTGAATCGATGCATG	Kmer	EA686_00535	3.94 E-10	putative_pilus_assembly_protein_FilE
CRO	Kmers	ATATAAAGTGACTGTTGAATG	Kmer	EA702_RS08860	3.94 E-10	PLP-dependent_aminotransferase_family_protein
CRO	Kmers	CAATAATATAGAGGCTTCTCA	Kmer	EA686_00535	3.94 E-10	putative_pilus_assembly_protein_FilE
CRO	Kmers	TTCCAATCAACCATATACAAA	Kmer	EA702_RS07875	3.94 E-10	acinetobactin_non-ribosomal_peptide_synthetase_subunit_BasB
CRO	Kmers	GCAACGCATAAAGTTGTGATA	Kmer	EA686_00535	3.94 E-10	putative_pilus_assembly_protein_FilE
CRO	Kmers	ACCGACCAAAATAATATCTGG	Kmer	EA722_RS07050	3.94 E-10	type_IV_pilus_twitching_motility_protein_PilT
CRO	Kmers	TTCAGCTGTACCAATACGAAA	Kmer	EA686_28060	3.94 E-10	copper_oxidase
CRO	Kmers	AATACTTTTTTCAATAGAAGG	Kmer	EA722_RS13850	3.94 E-10	4-hydroxybenzoate_3-monooxygenase
CRO	Kmers	AACCCTGTTCTTGCTCGTGCA	Kmer	EA686_01165	3.94 E-10	citrate_(Si)-synthase
CRO	Kmers	ACGCATTTGAAAAACGAGATA	Kmer	EA686_11515	3.94 E-10	enoyl-CoA_hydratase
CRO	Kmers	CTACTATGTTTGCCATACACC	Kmer	EA722_RS04070	3.94 E-10	PLP-dependent_aminotransferase_family_protein
CRO	Kmers	ACTTTGCATGAAGAAACTAAT	Kmer	EA702_RS14835	3.94 E-10	ABC_transporter_substrate-binding_protein
CRO	Kmers	CTTCAATCAGGTTTACTTAAA	Kmer	EA686_00345	3.94 E-10	type_I_secretion_C-terminal_target_domain-containing_protein
CRO	Kmers	ACTTTCACTAAAACCAAGTGG	Kmer	EA722_RS11160	3.94 E-10	UDP-N-acetylmuramate:L-alanyl-gamma-D-glutamyl-_meso-diaminopimelate_ligase
CRO	Kmers	TCCAATACTTTAGAAACGTAA	Kmer	EA702_RS06385	3.94 E-10	LTA_synthase_family_protein
CRO	Kmers	CATTGCTGTACGCAAAGAAAG	Kmer	EA702_RS06385	3.94 E-10	LTA_synthase_family_protein
CRO	Kmers	CAATTGTTGTCGTTTTTCCAA	Kmer	EA722_RS09825	3.94 E-10	signal_recognition_particle-docking_protein_FtsY
CRO	Kmers	AGTAAATAAATTAATCGCGCC	Kmer	EA702_RS08950	3.94 E-10	amino_acid_ABC_transporter_permease
CRO	Kmers	AACCGGTTTTAATTTTATCTG	Kmer	EA722_RS04430	3.94 E-10	alpha/beta_hydrolase
CRO	Kmers	GATTTTGTATAGCCTGAATGA	Kmer	EA702_RS07875	3.94 E-10	acinetobactin_non-ribosomal_peptide_synthetase_subunit_BasB
CRO	Kmers	AAAAAATAGCCTTTTCTGAAA	Kmer	EA703_RS10290	3.94 E-10	amino_acid_adenylation_domain-containing_protein
CRO	Kmers	ACGTACTAGTTTTATAAGAGC	Kmer	EA686_00370	3.94 E-10	glycerophosphodiester_phosphodiesterase
CRO	Kmers	AATAATTATTTCAACTGCCTG	Kmer	EA722_RS15005	3.94 E-10	dihydrolipoyl_dehydrogenase
CRO	Kmers	CTTCTAATGGTTTTTCGGTAA	Kmer	EA686_09495	3.94 E-10	50S_ribosomal_protein_L16
CRO	Kmers	CTTCTTGTTTACAAGTGGTGA	Kmer	EA686_16080	3.94 E-10	cytochrome_ubiquinol_oxidase_subunit_I
CRO	Kmers	AAAGATTATAAAAAATCAATT	Kmer	EA686_00535	3.94 E-10	putative_pilus_assembly_protein_FilE
CRO	Kmers	CTATAAATTTGATCTTGCAGA	Kmer	EA686_08600	3.94 E-10	ATP-binding_protein
CRO	Kmers	AGGGCCACACTGAGTGGACCA	Kmer	EA686_05215	3.94 E-10	EamA_family_transporter
CRO	Kmers	ATTAAATATGTTACTCCGATC	Kmer	EA702_RS06385	3.94 E-10	LTA_synthase_family_protein
CRO	Kmers	AAGCCAAGAAAATTCCCCATT	Kmer	EA722_RS16115	3.94 E-10	NCS1_family_nucleobase:cation_symporter-1
CRO	Kmers	GTTGAACATTCATTTCGGCAA	Kmer	EA686_07365	3.94 E-10	UvrABC_system_protein_C
CRO	Kmers	ATTTAACTCTTGCTGTACCGC	Kmer	EA686_00475	3.94 E-10	transcription_termination/antitermination_protein_NusA
CRO	Kmers	AAGTAAAGCGACTTTTCATAC	Kmer	EA702_RS06385	3.94 E-10	LTA_synthase_family_protein
CRO	Kmers	TATGCAGACGGTTTTTATACA	Kmer	EA686_00535	3.94 E-10	putative_pilus_assembly_protein_FilE
CRO	Kmers	GTTAACTCTTTTTCTGTAACA	Kmer	EA686_00535	3.94 E-10	putative_pilus_assembly_protein_FilE
CRO	Kmers	TAATGTGTCCGGTCACTTCAA	Kmer	EA686_00345	3.94 E-10	type_I_secretion_C-terminal_target_domain-containing_protein
CRO	Kmers	ATAAACCCAGCGGAACACCAA	Kmer	EA722_RS16130	3.94 E-10	taurine_ABC_transporter_permease_TauC
CRO	Kmers	CTTAATGCTCGGTTGTCAGAA	Kmer	EA686_27425	3.94 E-10	3-deoxy-D-manno-octulosonic_acid_transferase
CRO	Kmers	CCGATCCAGTCATTTCTGGTA	Kmer	EA702_RS06385	3.94 E-10	LTA_synthase_family_protein
CRO	Kmers	GGCTGCGATTAAAGCAAAACA	Kmer	EA702_RS08455	3.94 E-10	fumarate_reductase/succinate_dehydrogenase_flavoprotein_subunit
CRO	Kmers	AGATATTGGCCTGTGAGTGAG	Kmer	EA702_RS16210	3.94 E-10	excinuclease_ABC_subunit_UvrA
CRO	Kmers	GTTCATTTAAGCCATTGTCAA	Kmer	EA686_16340	3.94 E-10	uracil_phosphoribosyltransferase
CRO	Kmers	ACAACTTATTTGCTCATACCT	Kmer	EA722_RS01405	3.94 E-10	aminotransferase_class_I/II-fold_pyridoxal_phosphate-dependent_enzyme
CRO	Kmers	AACACTTTCAAAAAGCGGAAC	Kmer	EA686_27290	3.94 E-10	amino_acid_permease
CRO	Kmers	TCTTTTGTTCACCAAAATCAA	Kmer	EA702_RS06385	3.94 E-10	LTA_synthase_family_protein
CRO	Kmers	AAAATAAGTCTGGCTAACCGT	Kmer	EA686_10530	3.94 E-10	chromate_efflux_transporter
CRO	Kmers	GTCACAGCCTTTTGCAATACA	Kmer	EA722_RS09235	3.94 E-10	thiamine_pyrophosphate-dependent_dehydrogenase_E1_component_subunit_alpha
CRO	Kmers	GGTGAACCGGTTTTAATTTTA	Kmer	EA722_RS04430	3.94 E-10	alpha/beta_hydrolase
CRO	Kmers	CAAACCCGCAATCACAGCTAA	Kmer	EA686_04875	3.94 E-10	DUF2474_domain-containing_protein
CRO	Kmers	AGTTTGTCGATTGAAAAGCTG	Kmer	EA686_00535	3.94 E-10	putative_pilus_assembly_protein_FilE
CRO	Kmers	CCAAATGAATTGTTATATGTC	Kmer	EA702_RS06385	3.94 E-10	LTA_synthase_family_protein
CRO	Kmers	TGTCGCAGAATATTGAGGAAA	Kmer	EA702_RS03435	3.94 E-10	ferrochelatase
CRO	Kmers	ACGAAAAAGAATACTTGCAGC	Kmer	EA686_13280	3.94 E-10	ATP-binding_protein
CRO	Kmers	AAATTTGATATTCATGCACCA	Kmer	EA722_RS05525	3.94 E-10	3-deoxy-D-manno-octulosonic_acid_transferase
CRO	Kmers	AAAAAGAGTTAACAAATCAGG	Kmer	EA686_00535	3.94 E-10	putative_pilus_assembly_protein_FilE
CRO	Kmers	ACTTCTCAACCGCCTGTTTAT	Kmer	EA686_18630	3.94 E-10	Lrp/AsnC_family_transcriptional_regulator
CRO	Kmers	ACAACGTAGCTTTACGTGTTG	Kmer	EA686_05180	3.94 E-10	translational_GTPase_TypA
CRO	Kmers	AGCAGCTTGTAGAAGCGATTA	Kmer	EA702_RS13335	3.94 E-10	fructose-bisphosphate_aldolase_class_II
CRO	Kmers	CGTGTAAGCTTACGCCGTTTA	Kmer	EA722_RS06795	3.94 E-10	CYTH_and_CHAD_domain-containing_protein
CRO	Kmers	ATCAGAACCTGTGAGCTGCGC	Kmer	EA686_06610	3.94 E-10	taurine_ABC_transporter_substrate-binding_protein
CRO	Kmers	AAGCTGTGCGACAAGATTCGA	Kmer	EA722_RS06500	3.94 E-10	tannase/feruloyl_esterase_family_alpha/beta_hydrolase
CRO	Kmers	TCACTGGCAGCAAAACGATAA	Kmer	EA722_RS12895	3.94 E-10	MFS_transporter
CRO	Kmers	GCAAAAGGCTGTGACATTCAC	Kmer	EA722_RS09235	3.94 E-10	thiamine_pyrophosphate-dependent_dehydrogenase_E1_component_subunit_alpha
CRO	Kmers	TAACCAATTGATTTTAAATAA	Kmer	EA722_RS03210	3.94 E-10	LTA_synthase_family_protein
CRO	Kmers	CCCGGAACTACAAGGTATTGC	Kmer	EA722_RS02030	3.94 E-10	glycine--tRNA_ligase_subunit_beta
CRO	Kmers	AAGATTATGGGTTTGTGACTT	Kmer	EA702_RS06385	3.94 E-10	LTA_synthase_family_protein
CRO	Kmers	ATAATCGTAATAAGGTATATC	Kmer	EA702_RS06385	3.94 E-10	LTA_synthase_family_protein
CRO	Kmers	CTTGAAGATCAAGAATTTAAC	Kmer	EA686_00535	3.94 E-10	putative_pilus_assembly_protein_FilE
CRO	Kmers	CACGAATATGTTCAGTCGTAA	Kmer	EA702_RS08490	3.94 E-10	hypothetical_protein
CRO	Kmers	ACGCGTGCCTGATGAATGTGC	Kmer	EA686_01350	3.94 E-10	CHAD_domain-containing_protein
CRO	Kmers	ACACACTACAGTAAGTAAAGA	Kmer	EA722_RS16115	3.94 E-10	NCS1_family_nucleobase:cation_symporter-1
CRO	Kmers	AATAATATCTGGGTCTTCACG	Kmer	EA702_RS12675	3.94 E-10	type_IV_pilus_twitching_motility_protein_PilT
CRO	Kmers	AGGCTTTATAAAGTGAATGTG	Kmer	EA686_19040	3.94 E-10	signal_recognition_particle-docking_protein_FtsY
CRO	Kmers	ATATGGGCGTGGTTCGGCAGG	Kmer	EA722_RS09880	3.94 E-10	TonB-dependent_siderophore_receptor
CRO	Kmers	CCTATAAATTTGATCTTGCAG	Kmer	EA686_08600	3.94 E-10	ATP-binding_protein
CRO	Kmers	GTCTTTTTTATTTAACTTAAA	Kmer	EA686_29175	3.94 E-10	transcriptional_regulator
CRO	Kmers	ACGTCAACAACTGTTATTTAT	Kmer	#N/A	3.94 E-10	intergenic
CRO	Kmers	AATTCAAGATTATGGGTTTGT	Kmer	EA702_RS06385	3.94 E-10	LTA_synthase_family_protein
CRO	Kmers	AGTTGAGCCTTGCTATCGTTG	Kmer	EA729_RS00435	3.94 E-10	methionine_ABC_transporter_ATP-binding_protein
CRO	Kmers	AAGCTTTGCAAGAAGAGTTGG	Kmer	EA722_RS09825	3.94 E-10	signal_recognition_particle-docking_protein_FtsY
CRO	Kmers	ACTTATGGTGTACCAGTTGAG	Kmer	EA702_RS13335	3.94 E-10	fructose-bisphosphate_aldolase_class_II
CRO	Kmers	ACCAATCCCAGCAATTACACC	Kmer	EA722_RS14405	3.94 E-10	acetyl-CoA_carboxylase
CRO	Kmers	TGCCTGATGGTTTGGGGCGCA	Kmer	EA686_00535	3.94 E-10	putative_pilus_assembly_protein_FilE
CRO	Kmers	ACTTTAAACAAACCCGCAATC	Kmer	EA686_04875	3.94 E-10	DUF2474_domain-containing_protein
CRO	Kmers	ATCGAATCAAAAATAAGATCA	Kmer	EA702_RS06385	3.94 E-10	LTA_synthase_family_protein
CRO	Kmers	CAGGCGCTTGTTTTTCCGAAA	Kmer	EA702_RS06385	3.94 E-10	LTA_synthase_family_protein
CRO	Kmers	AATTAAAATCAGTGCCATACC	Kmer	EA722_RS14110	3.94 E-10	ABC_transporter_ATP-binding_protein
CRO	Kmers	AATCATGAAAGCTCAAAAATA	Kmer	EA702_RS08360	3.94 E-10	3-hydroxybutyrate_dehydrogenase
CRO	Kmers	CGGTGAAACACGAATAAGTAA	Kmer	EA702_RS01610	3.94 E-10	type_II_toxin-antitoxin_system_HipA_family_toxin
CRO	Kmers	ATTGTTTGCTGAGTTGGTAGA	Kmer	EA722_RS02380	3.94 E-10	succinate_dehydrogenase_assembly_factor_2
CRO	Kmers	TAATTATTTAAATTTTCTAAA	Kmer	EA708_RS12520	3.94 E-10	hypothetical_protein
CRO	Kmers	GAGCACAGACAGGAACAGGTA	Kmer	EA686_16640	3.94 E-10	DEAD/DEAH_box_helicase
CRO	Kmers	CCACTTGGTTTTAGTGAAAGC	Kmer	EA686_06000	3.94 E-10	UDP-N-acetylmuramate:L-alanyl-gamma-D-glutamyl-_meso-diaminopimelate_ligase
CRO	Kmers	ACAGCCTGGATACGTGTTCCA	Kmer	EA702_RS03205	3.94 E-10	transcription_termination/antitermination_protein_NusA
CRO	Kmers	TCAAGTGATATAAATTTCTCA	Kmer	EA702_RS06385	3.94 E-10	LTA_synthase_family_protein
CRO	Kmers	GCAACGTTCTACAGTTATATA	Kmer	EA716_RS15225	3.94 E-10	hypothetical_protein
CRO	Kmers	AGTAATTTAAGTCCAGAAGAT	Kmer	EA702_RS06385	3.94 E-10	LTA_synthase_family_protein
CRO	Kmers	AATGGATGAAAGCTGCGGTTG	Kmer	EA686_19565	3.94 E-10	NAD(FAD)-dependent_dehydrogenase
CRO	Kmers	AATTGGTAAGCCAAGAAAATT	Kmer	EA722_RS16115	3.94 E-10	NCS1_family_nucleobase:cation_symporter-1
CRO	Kmers	GCATTCAACAGTCACTTTATA	Kmer	EA702_RS08860	3.94 E-10	PLP-dependent_aminotransferase_family_protein
CRO	Kmers	AGCCATCAGCCGCTTTTTTAT	Kmer	EA686_03980	3.94 E-10	heme-binding_protein
CRO	Kmers	TATGGATTGGTTTAAAAAAGA	Kmer	EA686_03620	3.94 E-10	metal-dependent_hydrolase
CRO	Kmers	AACGTGATCAGCAAGGAACTG	Kmer	EA686_06000	3.94 E-10	UDP-N-acetylmuramate:L-alanyl-gamma-D-glutamyl-_meso-diaminopimelate_ligase
CRO	Kmers	TCGATTCAAGGAGTTTTAAAA	Kmer	EA686_00535	3.94 E-10	putative_pilus_assembly_protein_FilE
CRO	Kmers	ACCACAGTAAGTAAAGAAAAG	Kmer	EA686_26715	3.94 E-10	NCS1_family_nucleobase:cation_symporter-1
CRO	Kmers	ATTTTCAAACTTCTCAACCGC	Kmer	EA686_18630	3.94 E-10	Lrp/AsnC_family_transcriptional_regulator
CRO	Kmers	ACAGCTAAACCAATCAAACCT	Kmer	EA686_17180	3.94 E-10	DMT_family_transporter
CRO	Kmers	CGGTCTACTTTCCGATGTGGA	Kmer	EA722_RS07595	3.94 E-10	DMT_family_transporter
CRO	Kmers	AGCGTCAATCGTTTTAGTAAG	Kmer	EA722_RS01750	3.94 E-10	alpha/beta_hydrolase
CRO	Kmers	TAATGCTCGGTTGTCAGAGAA	Kmer	EA722_RS05525	3.94 E-10	3-deoxy-D-manno-octulosonic_acid_transferase
CRO	Kmers	AATGTAACCAGCGTATTGTTA	Kmer	EA702_RS06385	3.94 E-10	LTA_synthase_family_protein
CRO	Kmers	AGGCGACAATAAATTAGAAAC	Kmer	EA702_RS06385	3.94 E-10	LTA_synthase_family_protein
CRO	Kmers	ACTCATTACTATGCCAGCACC	Kmer	EA702_RS01980	3.94 E-10	hypothetical_protein
CRO	Kmers	ATGGTGTACCAGTTGAGCAGC	Kmer	EA702_RS13335	3.94 E-10	fructose-bisphosphate_aldolase_class_II
CRO	Kmers	TTATCATTTTTGGGTAAAAAA	Kmer	EA742_RS16375	3.94 E-10	phytanoyl-CoA_dioxygenase
CRO	Kmers	CCCATAATCTTGAATTTTTCG	Kmer	EA702_RS06385	3.94 E-10	LTA_synthase_family_protein
CRO	Kmers	GTGTCATGTCCATTCCCGCCA	Kmer	EA686_00345	3.94 E-10	type_I_secretion_C-terminal_target_domain-containing_protein
CRO	Kmers	GAATACGACTTTTTTCCCAAA	Kmer	EA702_RS06385	3.94 E-10	LTA_synthase_family_protein
CRO	Kmers	CCCCTTGAGGTTCACCATAAC	Kmer	EA722_RS12880	3.94 E-10	PLP-dependent_aminotransferase_family_protein
CRO	Kmers	CGATCCATTGCACGAGCAAGA	Kmer	EA686_01165	3.94 E-10	citrate_(Si)-synthase
CRO	Kmers	ATGGCCCAGCAACGTTTAAAT	Kmer	EA722_RS02735	3.94 E-10	ATP-dependent_protease
CRO	Kmers	AACTGAACAAACTTAGCCTCA	Kmer	EA722_RS18475	3.94 E-10	NAD(P)/FAD-dependent_oxidoreductase
CRO	Kmers	ACAATAATAATATTCGGATAT	Kmer	EA702_RS06385	3.94 E-10	LTA_synthase_family_protein
CRO	Kmers	AAAAACAGCGGGTCATGATTG	Kmer	EA702_RS14850	3.94 E-10	ABC_transporter_ATP-binding_protein
CRO	Kmers	CATGTTTTATTTAACCAAAGA	Kmer	EA686_04350	3.94 E-10	glucose_1-dehydrogenase
CRO	Kmers	ATTAGAAACTTGATTTTGGTG	Kmer	EA702_RS06385	3.94 E-10	LTA_synthase_family_protein
CRO	Kmers	ACAGCAAATTTTGCAGCAACA	Kmer	EA702_RS06385	3.94 E-10	LTA_synthase_family_protein
CRO	Kmers	GGTGATTACCGAAAAATTCAA	Kmer	EA702_RS06385	3.94 E-10	LTA_synthase_family_protein
CRO	Kmers	ATTGATGTTCAAGGCGGGAAA	Kmer	EA686_06405	3.94 E-10	magnesium-translocating_P-type_ATPase
CRO	Kmers	TAGTGGTTTAATTTACTTAAA	Kmer	EA702_RS06385	3.94 E-10	LTA_synthase_family_protein
CRO	Kmers	TAAAATTTTTTTATTCATTTA	Kmer	EA686_00540	3.94 E-10	protein_FilF
CRO	Kmers	AAATTTAGATTTATCGAGTGA	Kmer	EA686_00535	3.94 E-10	putative_pilus_assembly_protein_FilE
CRO	Kmers	TATCGTTTTGCTGCCAGTGAA	Kmer	EA722_RS12895	3.94 E-10	MFS_transporter
CRO	Kmers	CTTATGTCCCTAATATTATTA	Kmer	EA702_RS06385	3.94 E-10	LTA_synthase_family_protein
CRO	Kmers	AGAGTTCCATATTCCGAAGTC	Kmer	EA686_23920	3.94 E-10	TonB-dependent_siderophore_receptor
CRO	Kmers	AGCAGGAGACCTATTTGCTGA	Kmer	EA702_RS07940	3.94 E-10	acinetobactin_export_ABC_transporter_permease/ATP-binding_subunit_BarB
CRO	Kmers	ACTATCTTTTCGAGTTTAGCC	Kmer	#N/A	3.94 E-10	intergenic
CRO	Kmers	AGAGTATTTAAGATTATATGG	Kmer	EA686_11975	3.94 E-10	hypothetical_protein
CRO	Kmers	ATATTTTGTACCTTCAATGAG	Kmer	EA702_RS01610	3.94 E-10	type_II_toxin-antitoxin_system_HipA_family_toxin
CRO	Kmers	CATGTTTTATTTAACTAAAGA	Kmer	EA722_RS17960	3.94 E-10	glucose_1-dehydrogenase
CRO	Kmers	ACACATTTTATTGAATTATCT	Kmer	EA696_RS10825	3.94 E-10	hypothetical_protein
CRO	Kmers	CTCAGCCATTAAGTCAGTTAA	Kmer	EA686_17650	3.94 E-10	alpha/beta_fold_hydrolase
CRO	Kmers	AAAAACGCCAAAAATTTTCTT	Kmer	EA722_RS13485	3.94 E-10	DedA_family_protein
CRO	Kmers	ACAGCAATGAGGAGTATGATA	Kmer	EA702_RS06385	3.94 E-10	LTA_synthase_family_protein
CRO	Kmers	TGATTGAAGTGACCGGACACA	Kmer	EA686_00345	3.94 E-10	type_I_secretion_C-terminal_target_domain-containing_protein
CRO	Kmers	GCTAGCGGGAAGCACATCTAA	Kmer	EA722_RS10480	3.94 E-10	ParA_family_protein
CRO	Kmers	ACTACAGGGACCGCAGCAGCA	Kmer	EA686_09930	3.94 E-10	GtrA_family_protein
CRO	Kmers	CACTAGCAACCAAAGATGCGA	Kmer	EA722_RS00040	3.94 E-10	AdeC/AdeK/OprM_family_multidrug_efflux_complex_outer_membrane_factor
CRO	Kmers	CCAATTGATTTTAAATAATAA	Kmer	EA722_RS03210	3.94 E-10	LTA_synthase_family_protein
CRO	Kmers	CTGTAACAGCCGATTCGTTAA	Kmer	EA722_RS12555	3.94 E-10	K(+)-transporting_ATPase_subunit_B
CRO	Kmers	GTTGCTGCAAAATTTGCTGTA	Kmer	EA702_RS06385	3.94 E-10	LTA_synthase_family_protein
CRO	Kmers	AACATGTCCAAGAAAAATTAA	Kmer	EA686_00535	3.94 E-10	putative_pilus_assembly_protein_FilE
CRO	Kmers	AGCGGCTAAACCTTCTGGATA	Kmer	EA722_RS08775	3.94 E-10	aminopeptidase_P_family_protein
CRO	Kmers	AGCAATGAGGAGTATGATAAG	Kmer	EA702_RS06385	3.94 E-10	LTA_synthase_family_protein
CRO	Kmers	GCCAGAGGGTGCATCGGGTTA	Kmer	EA702_RS12740	3.94 E-10	gamma-glutamyltransferase
CRO	Kmers	GGGCAATATACCTTGCATGAA	Kmer	EA686_04090	3.94 E-10	ABC_transporter_substrate-binding_protein
CRO	Kmers	AGAAGCAGCAAGCCCTTGTAC	Kmer	EA686_05115	3.94 E-10	acyl-CoA_dehydrogenase
CRO	Kmers	GCCCAATAATTGTATAAAAAC	Kmer	EA686_00535	3.94 E-10	putative_pilus_assembly_protein_FilE
CRO	Kmers	AATATACCTTGCATGAAGAAA	Kmer	EA686_04090	3.94 E-10	ABC_transporter_substrate-binding_protein
CRO	Kmers	ACCACGCTGGCTTGCTTCAAA	Kmer	EA702_RS06585	3.94 E-10	MFS_transporter
CRO	Kmers	CTGTTGCTACTAAACCGTCAC	Kmer	EA722_RS04715	3.94 E-10	catechol_1,2-dioxygenase
CRO	Kmers	ACGTATCCAGGCTGTACAGCA	Kmer	EA702_RS03205	3.94 E-10	transcription_termination/antitermination_protein_NusA
CRO	Kmers	TTCACAAAGGGGAACTGAAAA	Kmer	EA686_11515	3.94 E-10	enoyl-CoA_hydratase
CRO	Kmers	ATAATGTAGCACTCAACAGAA	Kmer	#N/A	3.94 E-10	intergenic
CRO	Kmers	CATAACAATAATAATATTCGG	Kmer	EA702_RS06385	3.94 E-10	LTA_synthase_family_protein
CRO	Kmers	GGTCACTTCAATCAGGTTTAC	Kmer	EA686_00345	3.94 E-10	type_I_secretion_C-terminal_target_domain-containing_protein
CRO	Kmers	GAGCTTTCTGGAGGACAAAAA	Kmer	EA702_RS14850	3.94 E-10	ABC_transporter_ATP-binding_protein
CRO	Kmers	ATCACCAAGTCGGCCGGGTGC	Kmer	EA686_00900	3.94 E-10	multidrug_efflux_RND_transporter_permease_subunit_AdeB
CRO	Kmers	AACTCTTTTTCTGTAACATCC	Kmer	EA686_00535	3.94 E-10	putative_pilus_assembly_protein_FilE
CRO	Kmers	TTTAAATTTTCTAAATTCAAA	Kmer	EA686_15990	3.94 E-10	fimbrial_biogenesis_outer_membrane_usher_protein
CRO	Kmers	GTAAAGTATCTGAGCAAGACA	Kmer	EA702_RS06385	3.94 E-10	LTA_synthase_family_protein
CRO	Kmers	CTCTTCTTGCAAAGCTTTATA	Kmer	EA722_RS09825	3.94 E-10	signal_recognition_particle-docking_protein_FtsY
CRO	Kmers	CCTAAAATGATGTCACTATTA	Kmer	EA686_17180	3.94 E-10	DMT_family_transporter
CRO	Kmers	ATGCATTACCGTTGCATCAAT	Kmer	EA722_RS13570	3.94 E-10	MFS_transporter
CRO	Kmers	GGTTGCCGAACCTAAAAGAAC	Kmer	EA722_RS00830	3.94 E-10	primosomal_protein_N'
CRO	Kmers	CAAATAGGTCTCCTGCTAAAC	Kmer	EA722_RS11570	3.94 E-10	acinetobactin_export_ABC_transporter_permease/ATP-binding_subunit_BarB
CRO	Kmers	ACCTCTCATCTGGTTCGTCTA	Kmer	EA686_08280	3.94 E-10	ABC_transporter_substrate-binding_protein
CRO	Kmers	ACGTGTCAGGTTATTTATATC	Kmer	EA686_04220	3.94 E-10	type_I_secretion_protein
CRO	Kmers	CGTTTGTCTTCACAAGAGCTA	Kmer	EA686_00535	3.94 E-10	putative_pilus_assembly_protein_FilE
CRO	Kmers	AAAGAGAGCTTTCTTGCAAAG	Kmer	#N/A	3.94 E-10	intergenic
CRO	Kmers	TGGCCACGGAAGCCATTGAAA	Kmer	EA686_00535	3.94 E-10	putative_pilus_assembly_protein_FilE
CRO	Kmers	TGCCACTGGTTGCTATGCTAA	Kmer	EA722_RS14235	3.94 E-10	hypothetical_protein
CRO	Kmers	AAGCCAAGAAATAATAGAAGA	Kmer	EA686_03630	3.94 E-10	SDR_family_oxidoreductase
CRO	Kmers	ACGTTCTACAGTTATATATGG	Kmer	EA716_RS15225	3.94 E-10	hypothetical_protein
CRO	Kmers	AGCTGATCTAAAGTTGATCGA	Kmer	EA686_00535	3.94 E-10	putative_pilus_assembly_protein_FilE
CRO	Kmers	CACGCGGCTTGCCTGAACATG	Kmer	EA686_28350	3.94 E-10	tRNA_(uridine(34)/cytosine(34)/5-_carboxymethylaminomethyluridine(34)-2'-O)-_methyltransferase_TrmL
CRO	Kmers	AGTCAATGGAATCACGCGCTC	Kmer	EA722_RS14260	3.94 E-10	glutamine--tRNA_ligase/YqeY_domain_fusion_protein
CRO	Kmers	CAACGGTAATGCATGTTGCAA	Kmer	EA722_RS13570	3.94 E-10	MFS_transporter
CRO	Kmers	CTTTTAAAAACTTATTTATAA	Kmer	EA675_RS04285	3.94 E-10	hypothetical_protein
CRO	Kmers	AACCGGCAAAGCAGATATGAT	Kmer	EA722_RS17585	3.94 E-10	NADPH-dependent_2,4-dienoyl-CoA_reductase
CRO	Kmers	CAAAATCAAGTTTCTAATTTA	Kmer	EA702_RS06385	3.94 E-10	LTA_synthase_family_protein
CRO	Kmers	GCATCGATTCAAGGAGTTTTA	Kmer	EA686_00535	3.94 E-10	putative_pilus_assembly_protein_FilE
CRO	Kmers	AAAATTGGGCGCAAGAAATTA	Kmer	EA722_RS13100	3.94 E-10	MFS_transporter
CRO	Kmers	ATTAAAGCCAAACAAGAAAAC	Kmer	EA686_14275	3.94 E-10	fumarate_reductase/succinate_dehydrogenase_flavoprotein_subunit
CRO	Kmers	ACAGGGCCGGTGTTGTAGATA	Kmer	EA686_14645	3.94 E-10	amino_acid_permease
CRO	Kmers	ACGCCAAGCTTTGCGATAGCT	Kmer	EA722_RS01605	3.94 E-10	aldehyde_dehydrogenase
CRO	Kmers	AACACTTTCAAAAAGCGGGAC	Kmer	EA702_RS01845	3.94 E-10	amino_acid_permease
CRO	Kmers	CAGAAAAAGAGTTAACAAATC	Kmer	EA686_00535	3.94 E-10	putative_pilus_assembly_protein_FilE
CRO	Kmers	CCGATGCACCCTCTGGCGCGG	Kmer	EA702_RS12740	3.94 E-10	gamma-glutamyltransferase
CRO	Kmers	CTCAGCAAATAGGTCTCCTGC	Kmer	EA702_RS07940	3.94 E-10	acinetobactin_export_ABC_transporter_permease/ATP-binding_subunit_BarB
CRO	Kmers	AAAGTCACAAACCCATAATCT	Kmer	EA702_RS06385	3.94 E-10	LTA_synthase_family_protein
CRO	Kmers	CAGAAATGACTGGATCGGTGA	Kmer	EA702_RS06385	3.94 E-10	LTA_synthase_family_protein
CRO	Kmers	AACAGCATTTTTAACTTCAAT	Kmer	EA686_04220	3.94 E-10	type_I_secretion_protein
CRO	Kmers	TCCATTGGTCACGGTTAGCCA	Kmer	EA686_10530	3.94 E-10	chromate_efflux_transporter
CRO	Kmers	AATAAAGCACTTATCTTGTTC	Kmer	EA686_00535	3.94 E-10	putative_pilus_assembly_protein_FilE
CRO	Kmers	CAAAATAATATCAGGGTCTTC	Kmer	EA686_24665	3.94 E-10	twitching_motility_protein_PilT
CRO	Kmers	AAAGGGGAACTGAAAAATAGA	Kmer	EA686_11515	3.94 E-10	enoyl-CoA_hydratase
CRO	Kmers	ATGCTTTAAAAAGTATTAAAT	Kmer	EA664_RS09800	3.94 E-10	GNAT_family_N-acetyltransferase
CRO	Kmers	ACGTATCAACCTGCATGGGGC	Kmer	EA686_22920	3.94 E-10	PaaI_family_thioesterase
CRO	Kmers	TCAAGTTGCGTTAAGCCATGA	Kmer	EA686_08005	3.94 E-10	UDP-N-acetylglucosamine_2-epimerase_(non-hydrolyzing)
CRO	Kmers	GGCATTATTAAGCATGGCTCA	Kmer	EA686_03635	3.94 E-10	acyl-CoA_carboxylase_subunit_beta
CRO	Kmers	AGCAAAAATAATGTAGCACTC	Kmer	EA730_RS06575	3.94 E-10	MFS_transporter
CRO	Kmers	ATTTATCTAAAAGATCCAACC	Kmer	EA686_00215	3.94 E-10	alpha/beta_hydrolase
CRO	Kmers	AAATCAAATAGGTATAAAACT	Kmer	#N/A	3.94 E-10	intergenic
CRO	Kmers	AATGCTTTAAAAAGTATTAAA	Kmer	EA664_RS09800	3.94 E-10	GNAT_family_N-acetyltransferase
CRO	Kmers	TCAGGTTATGGTGAACCTCAA	Kmer	EA722_RS12880	3.94 E-10	PLP-dependent_aminotransferase_family_protein
CRO	Kmers	AAGTACCGCCTTCAGCACATT	Kmer	EA686_00535	3.94 E-10	putative_pilus_assembly_protein_FilE
CRO	Kmers	ATGCACCCTCTGGCGCGGCGG	Kmer	EA702_RS12740	3.94 E-10	gamma-glutamyltransferase
CRO	Kmers	GCAAGGCTCAACTGGAAAAGA	Kmer	#N/A	3.94 E-10	intergenic
CRO	Kmers	GACGAACCAGATGAGAGGTGA	Kmer	EA686_08280	3.94 E-10	ABC_transporter_substrate-binding_protein
CRO	Kmers	CGATTGATGCAACGGTGATGC	Kmer	EA686_06090	3.94 E-10	SmvA_family_efflux_MFS_transporter
CRO	Kmers	AACGGCGCAATACTTTTTTCA	Kmer	EA722_RS13850	3.94 E-10	4-hydroxybenzoate_3-monooxygenase
CRO	Kmers	TACCTTATTACGATTATAGTA	Kmer	EA702_RS06385	3.94 E-10	LTA_synthase_family_protein
CRO	Kmers	CAGAAAAAGCGTTGTTTGCTG	Kmer	EA686_26415	3.94 E-10	succinate_dehydrogenase_assembly_factor_2
CRO	Kmers	AAACCCTGTTCTTGCTCGTGC	Kmer	EA686_01165	3.94 E-10	citrate_(Si)-synthase
CRO	Kmers	CTGTTGAGATGTCCAAAATTC	Kmer	EA722_RS17025	3.94 E-10	DNA_mismatch_repair_endonuclease_MutL
CRO	Kmers	AATTTGGCTGTTTAGGTTCCA	Kmer	EA686_28060	3.94 E-10	copper_oxidase
CRO	Kmers	AATTTACTTAAATTTTATTAG	Kmer	EA702_RS06385	3.94 E-10	LTA_synthase_family_protein
CRO	Kmers	AAATTTATCATTGGTCCAATT	Kmer	EA686_08925	3.94 E-10	cation_transporter
CRO	Kmers	GTTGAACAGGCTCTGAAACTA	Kmer	EA686_08885	3.94 E-10	DNA_polymerase_III_subunit_amma/tau
CRO	Kmers	AGATTACTATCAATTTGTTGA	Kmer	EA702_RS06385	3.94 E-10	LTA_synthase_family_protein
CRO	Kmers	AGTTCAGTTTGGATCGTAATA	Kmer	EA686_14625	3.94 E-10	OsmC_family_peroxiredoxin
CRO	Kmers	GATAATTCAATAAAATGTGTA	Kmer	EA686_13525	3.94 E-10	chemotaxis_protein
CRO	Kmers	CAAGCTTTACCGTTTAAACAA	Kmer	EA686_18045	3.94 E-10	adenosine_deaminase
CRO	Kmers	CGCCAGCACCATTTACAAAAC	Kmer	EA686_23355	3.94 E-10	TPM_domain-containing_protein
CRO	Kmers	CCAATACTTTAGAAACGTAAA	Kmer	EA702_RS06385	3.94 E-10	LTA_synthase_family_protein
CRO	Kmers	ATTACATTCACGAGCCACCAG	Kmer	EA722_RS02160	3.94 E-10	ATP-dependent_DNA_helicase_RecG
CRO	Kmers	AGATAGGCTTAAATCACACTC	Kmer	EA686_11130	3.94 E-10	bifunctional_tetrahydrofolate_synthase/dihydrofolate_synthase
CRO	Kmers	AGGTATATTGCCCAGATTTAA	Kmer	EA686_04090	3.94 E-10	ABC_transporter_substrate-binding_protein
CRO	Kmers	AAGCGGTACAGCAAGAGTTAA	Kmer	EA686_00475	3.94 E-10	transcription_termination/antitermination_protein_NusA
CRO	Kmers	AGGCAATAAAGATAAATAACA	Kmer	EA690_RS15200	3.94 E-10	two-component_sensor_histidine_kinase
CRO	Kmers	GGCTGCGATTAAAGCCAAACA	Kmer	EA686_14275	3.94 E-10	fumarate_reductase/succinate_dehydrogenase_flavoprotein_subunit
CRO	Kmers	CTGAACATTCATTTCGGCAAG	Kmer	EA722_RS08370	3.94 E-10	excinuclease_ABC_subunit_UvrC
CRO	Kmers	AGATAATAATATTAGGGACAT	Kmer	EA702_RS06385	3.94 E-10	LTA_synthase_family_protein
CRO	Kmers	ATTTTGTATAGCCTGAATGAA	Kmer	EA702_RS07875	3.94 E-10	acinetobactin_non-ribosomal_peptide_synthetase_subunit_BasB
CRO	Kmers	CAGAAGATAAAGGCGTCATCA	Kmer	EA686_00535	3.94 E-10	putative_pilus_assembly_protein_FilE
CRO	Kmers	ATGTCCAAGAAAAATTAAATA	Kmer	EA686_00535	3.94 E-10	putative_pilus_assembly_protein_FilE
CRO	Kmers	TACCTATTTGATTTCAGAAAA	Kmer	EA682_RS08030	3.94 E-10	hypothetical_protein
CRO	Kmers	ATAACAATAATAATATTCGGA	Kmer	EA702_RS06385	3.94 E-10	LTA_synthase_family_protein
CRO	Kmers	AGCTGAAACCTACGATGTCAT	Kmer	EA686_28060	3.94 E-10	copper_oxidase
CRO	Kmers	AAATTTTTTTATTCATTTAGC	Kmer	EA686_00540	3.94 E-10	protein_FilF
CRO	Kmers	TATGAATCTAACTTGGCATAA	Kmer	EA686_04920	3.94 E-10	capsule_assembly_Wzi_family_protein
CRO	Kmers	AGGTTTACTTAAAAGGTGAGG	Kmer	EA686_00345	3.94 E-10	type_I_secretion_C-terminal_target_domain-containing_protein
CRO	Kmers	AATGCTGAACAGAAGGATTTA	Kmer	EA686_00535	3.94 E-10	putative_pilus_assembly_protein_FilE
CRO	Kmers	AGCCTTAGCTGTGATTGCGGG	Kmer	EA686_04875	3.94 E-10	DUF2474_domain-containing_protein
CRO	Kmers	CATGTTATTGGAGAGAAGACG	Kmer	EA686_03965	3.94 E-10	magnesium_transporter
CRO	Kmers	CGCTTCTACAAGCTGCTCAAC	Kmer	EA702_RS13335	3.94 E-10	fructose-bisphosphate_aldolase_class_II
CRO	Kmers	AATACGCTGGTTACATTATCC	Kmer	EA702_RS06385	3.94 E-10	LTA_synthase_family_protein
CRO	Kmers	AGCTGCAATCATGACCCGCTG	Kmer	EA702_RS14850	3.94 E-10	ABC_transporter_ATP-binding_protein
CRO	Kmers	GCATGTTGACATCCAGCAGTA	Kmer	EA686_08215	3.94 E-10	response_regulator
CRO	Kmers	GATAAAATTAAAACCGGTTCA	Kmer	EA722_RS04430	3.94 E-10	alpha/beta_hydrolase
CRO	Kmers	AGAAACGTAAAAAGTCACAAA	Kmer	EA702_RS06385	3.94 E-10	LTA_synthase_family_protein
CRO	Kmers	TATTAATAAAAAGAAGCAACA	Kmer	EA702_RS06385	3.94 E-10	LTA_synthase_family_protein
CRO	Kmers	TACGTAAAATGACTAAATAAA	Kmer	EA686_05120	3.94 E-10	thioesterase_family_protein
CRO	Kmers	GCGTGATTGAAAATATTGACC	Kmer	EA702_RS12690	3.94 E-10	exonuclease_SbcCD_subunit_D
CRO	Kmers	CATTGCACGTGCAAGAACAGG	Kmer	EA702_RS10310	3.94 E-10	citrate_(Si)-synthase
CRO	Kmers	AACTCGAAAAGATAGTCAAAA	Kmer	EA686_05075	3.94 E-10	methionine--tRNA_ligase
CRO	Kmers	CAATGCTTTAAAAAGTATTAA	Kmer	EA664_RS09800	3.94 E-10	GNAT_family_N-acetyltransferase
CRO	Kmers	AATTACACGTTGGATTTTCAT	Kmer	EA702_RS06385	3.94 E-10	LTA_synthase_family_protein
CRO	Kmers	CGATTAAGTCTACTTTAAAAG	Kmer	EA702_RS06385	3.94 E-10	LTA_synthase_family_protein
CRO	Kmers	AAATATCTTCTGGACTTAAAT	Kmer	EA702_RS06385	3.94 E-10	LTA_synthase_family_protein
CRO	Kmers	CACAAATTTATCATTGGTCCA	Kmer	EA686_08925	3.94 E-10	cation_transporter
CRO	Kmers	AACCATCAGGCATAAGGTAAA	Kmer	EA686_00535	3.94 E-10	putative_pilus_assembly_protein_FilE
CRO	Kmers	ATAGTACTTTAATTTTTGATA	Kmer	EA686_00620	3.94 E-10	FKBP-type_peptidyl-prolyl_cis-trans_isomerase
CRO	Kmers	CCGCAATACCTTGTAGTTCCG	Kmer	EA722_RS02030	3.94 E-10	glycine--tRNA_ligase_subunit_beta
CRO	Kmers	TAATGCTCGGTTGTCAGAAAA	Kmer	EA686_27425	3.94 E-10	3-deoxy-D-manno-octulosonic_acid_transferase
CRO	Kmers	ACATAGCATGCATGCGATTGC	Kmer	EA702_RS08490	3.94 E-10	hypothetical_protein
CRO	Kmers	AGTATCTGAGCAAGACATACA	Kmer	EA702_RS06385	3.94 E-10	LTA_synthase_family_protein
CRO	Kmers	AAAAGTTGTTTTAGATAGGTT	Kmer	EA686_00215	3.94 E-10	alpha/beta_hydrolase
CRO	Kmers	GTGTGAAAGGCAACGTCTACA	Kmer	#N/A	3.94 E-10	intergenic
CRO	Kmers	ATTATTGGGCCAGATGGGCGG	Kmer	EA686_00535	3.94 E-10	putative_pilus_assembly_protein_FilE
CRO	Kmers	GCGATTAATTTATTTACTCGA	Kmer	EA702_RS08950	3.94 E-10	amino_acid_ABC_transporter_permease
CRO	Kmers	AAAATTTTTTTATTCATTTAG	Kmer	EA686_00540	3.94 E-10	protein_FilF
CRO	Kmers	ATAGAGGCTTCTCATTACTAG	Kmer	EA686_00535	3.94 E-10	putative_pilus_assembly_protein_FilE
CRO	Kmers	CATTCATCAGGCACGCGTAAG	Kmer	EA686_01350	3.94 E-10	CHAD_domain-containing_protein
CRO	Kmers	TAGGTGTTCCGCTTTTTGAAA	Kmer	EA686_27290	3.94 E-10	amino_acid_permease
CRO	Kmers	AATTGCATTGATGTTAAATGG	Kmer	EA686_00540	3.94 E-10	protein_FilF
CRO	Kmers	AGCGGGATATCTTTTGCATCG	Kmer	EA722_RS16140	3.94 E-10	taurine_ABC_transporter_substrate-binding_protein
CRO	Kmers	AAGGCGGGAAATCAGACTTTG	Kmer	EA686_06405	3.94 E-10	magnesium-translocating_P-type_ATPase
CRO	Kmers	ATTGACATCCAGCAGTACGAC	Kmer	EA722_RS02825	3.94 E-10	response_regulator
CRO	Kmers	AGATTCATATCCCATGCAACA	Kmer	EA664_RS12120	3.94 E-10	DUF4102_domain-containing_protein
CRO	Kmers	CCCCACTGTCCCTTCGGTATA	Kmer	EA722_RS06585	3.94 E-10	outer_membrane_porin,_OprD_family
CRO	Kmers	GACAAATATCGCTGTCTGTTA	Kmer	EA686_22625	3.94 E-10	DUF1989_domain-containing_protein
CRO	Kmers	AAAACTTATGCCAAGTTAGAT	Kmer	EA686_11295	3.94 E-10	bifunctional_proline_dehydrogenase/L-glutamate_amma-semialdehyde_dehydrogenase_PutA
CRO	Kmers	GTAAACGGCGTAAGCTTACAC	Kmer	EA722_RS06795	3.94 E-10	CYTH_and_CHAD_domain-containing_protein
CRO	Kmers	GGTATATTGCCCAGATTTAAA	Kmer	EA686_04090	3.94 E-10	ABC_transporter_substrate-binding_protein
CRO	Kmers	ACCGCTTGGATACGTGTTCCA	Kmer	EA686_00475	3.94 E-10	transcription_termination/antitermination_protein_NusA
CRO	Kmers	AAATAAAAAAGACCTAAATCA	Kmer	EA722_RS19110	3.94 E-10	hypothetical_protein
CRO	Kmers	AAGGCAGCAGTCTTACCTGTA	Kmer	EA702_RS14255	3.94 E-10	ATP-dependent_RNA_helicase_RhlB
CRO	Kmers	ACTGCGATCTATAGGTAAGTA	Kmer	EA702_RS18700	3.94 E-10	SMI1/KNR4_family_protein
CRO	Kmers	GCGCGTGATTCCATTGACTAA	Kmer	EA722_RS14260	3.94 E-10	glutamine--tRNA_ligase/YqeY_domain_fusion_protein
CRO	Kmers	CAGGCGGTTGAGAAGTTTGAA	Kmer	EA686_18630	3.94 E-10	Lrp/AsnC_family_transcriptional_regulator
CRO	Kmers	ACCCTGTTCTTGCACGTGCAA	Kmer	EA702_RS10310	3.94 E-10	citrate_(Si)-synthase
CRO	Kmers	AAACACGAATCGGACACATGG	Kmer	EA702_RS01610	3.94 E-10	type_II_toxin-antitoxin_system_HipA_family_toxin
CRO	Kmers	TAATGACCTGTTGCAATAAAA	Kmer	EA686_00985	3.94 E-10	tRNA_2-thiouridine(34)_synthase_MnmA
CRO	Kmers	CCTAAGCAACATTTAGAATTA	Kmer	EA722_RS19575	3.94 E-10	PLD-like_domain_protein
CRO	Kmers	ACCAAAGATGCGACTAAAGCA	Kmer	EA722_RS00040	3.94 E-10	AdeC/AdeK/OprM_family_multidrug_efflux_complex_outer_membrane_factor
CRO	Kmers	GTCGTACTGCTGGATGTCAAC	Kmer	EA686_08215	3.94 E-10	response_regulator
CRO	Kmers	ATTTTTAATAATGACATCGTC	Kmer	EA722_RS10420	3.94 E-10	nitroreductase_family_protein
CRO	Kmers	CAAACCATCAGGCATAAGGTA	Kmer	EA686_00535	3.94 E-10	putative_pilus_assembly_protein_FilE
CRO	Kmers	CAAGTTTCTAATTTATTGTCG	Kmer	EA702_RS06385	3.94 E-10	LTA_synthase_family_protein
CRO	Kmers	ACCACAGCCCACAATTAAGAT	Kmer	EA686_06375	3.94 E-10	class_I_SAM-dependent_methyltransferase
CRO	Kmers	AGGTCAGCTACGCCCACGGCG	Kmer	EA686_08600	3.94 E-10	ATP-binding_protein
CRO	Kmers	ACTTGGTTTTAGTGAAAGCGC	Kmer	EA686_06000	3.94 E-10	UDP-N-acetylmuramate:L-alanyl-gamma-D-glutamyl-_meso-diaminopimelate_ligase
CRO	Kmers	ATAGGTATAAAACTTATGCCA	Kmer	EA686_11295	3.94 E-10	bifunctional_proline_dehydrogenase/L-glutamate_amma-semialdehyde_dehydrogenase_PutA
CRO	Kmers	GATTGTAAAGCCGATTACTGA	Kmer	EA686_27440	3.94 E-10	hypothetical_protein
CRO	Kmers	CAGATTGAAACACCGGAAGAA	Kmer	EA686_11755	3.94 E-10	methionine_synthase
CRO	Kmers	ATCTAAATTTACAACTATTGA	Kmer	EA686_00535	3.94 E-10	putative_pilus_assembly_protein_FilE
CRO	Kmers	GGAACACGTATCCAAGCGGTA	Kmer	EA686_00475	3.94 E-10	transcription_termination/antitermination_protein_NusA
CRO	Kmers	AGGCGGTTGAGAAGTTTGAAA	Kmer	EA686_18630	3.94 E-10	Lrp/AsnC_family_transcriptional_regulator
CRO	Kmers	AAAAGGCAATAAAGATAAATA	Kmer	EA729_RS08670	3.94 E-10	hypothetical_protein
CRO	Kmers	GCATCGGTTAAGACTTTCATA	Kmer	EA686_20810	3.94 E-10	dihydrolipoyl_dehydrogenase
CRO	Kmers	ATTATCTTTTGTTCACCAAAA	Kmer	EA702_RS06385	3.94 E-10	LTA_synthase_family_protein
CRO	Kmers	ATATCACAGCCTTTTGCAATA	Kmer	EA686_08465	3.94 E-10	thiamine_pyrophosphate-dependent_dehydrogenase_E1_component_subunit_alpha
CRO	Kmers	ATGGTTTGGGGCGCACTGAAT	Kmer	EA686_00535	3.94 E-10	putative_pilus_assembly_protein_FilE
CRO	Kmers	AACTTTATGCGTTGCGATAGC	Kmer	EA686_00535	3.94 E-10	putative_pilus_assembly_protein_FilE
CRO	Kmers	AGACGTTGCCTTTCACACGAT	Kmer	#N/A	3.94 E-10	intergenic
CRO	Kmers	AGTGGTTTAATTTACTTAAAT	Kmer	EA702_RS06385	3.94 E-10	LTA_synthase_family_protein
CRO	Kmers	ATCAGCTGCTTATCATGGTCA	Kmer	EA722_RS00190	3.94 E-10	phosphogluconate_dehydratase
CRO	Kmers	AAGAAAAATTAAATACTGCAC	Kmer	EA686_00535	3.94 E-10	putative_pilus_assembly_protein_FilE
CRO	Kmers	GCGGTGGTCGAGGCAATCAAA	Kmer	EA722_RS06480	3.94 E-10	glucarate_dehydratase
CRO	Kmers	ACATCATTTTAGGTTTGATTG	Kmer	EA686_17180	3.94 E-10	DMT_family_transporter
CRO	Kmers	AAAAGATAATTCAATAAAATG	Kmer	EA722_RS07490	3.94 E-10	hypothetical_protein
CRO	Kmers	TAGCAACAGCAGTAGATGTCA	Kmer	EA722_RS04715	3.94 E-10	catechol_1,2-dioxygenase
CRO	Kmers	ACCAATTTATGCTTTACCTTA	Kmer	EA702_RS06385	3.94 E-10	LTA_synthase_family_protein
CRO	Kmers	CGCGGTTTTAGATAAATTGCC	Kmer	EA722_RS12955	3.94 E-10	LysR_family_transcriptional_regulator
CRO	Kmers	GTGTAGTCTTGTTTTAGAAAA	Kmer	EA702_RS07305	3.94 E-10	hypothetical_protein
CRO	Kmers	AAAGAAAATTTTTGGCGCTTT	Kmer	EA686_21330	3.94 E-10	DedA_family_protein
CRO	Kmers	TCAGCACTGCGTGAAGACCCA	Kmer	EA702_RS12675	3.94 E-10	type_IV_pilus_twitching_motility_protein_PilT
CRO	Kmers	CATGCCAAATTTTTTTTCATC	Kmer	EA722_RS09720	3.94 E-10	GGDEF_domain-containing_protein
CRO	Kmers	AAGAATTGGACCAATGATAAA	Kmer	EA686_08925	3.94 E-10	cation_transporter
CRO	Kmers	GAAAAATACAAAAACTGTTTC	Kmer	EA686_00535	3.94 E-10	putative_pilus_assembly_protein_FilE
CRO	Kmers	GCTGTATGTCTTGCTCAGATA	Kmer	EA702_RS06385	3.94 E-10	LTA_synthase_family_protein
CRO	Kmers	AAGTTTCGTTGCTCCAAAATT	Kmer	EA702_RS06385	3.94 E-10	LTA_synthase_family_protein
CRO	Kmers	AGATAAGTTGTAAGTGCCAAG	Kmer	EA702_RS06385	3.94 E-10	LTA_synthase_family_protein
CRO	Kmers	AATTGCTGGGATTGGTTTTGT	Kmer	EA722_RS14405	3.94 E-10	acetyl-CoA_carboxylase
CRO	Kmers	AAATTTGACCTTGCAGATGTT	Kmer	EA722_RS02735	3.94 E-10	ATP-dependent_protease
CRO	Kmers	AAAAGGCTGTGATATTCACGC	Kmer	EA686_08465	3.94 E-10	thiamine_pyrophosphate-dependent_dehydrogenase_E1_component_subunit_alpha
CRO	Kmers	TATATATTTGAATTTAGAAAA	Kmer	EA679_RS18120	3.94 E-10	hypothetical_protein
CRO	Kmers	CCGCGAAATAAACGTAGCGAG	Kmer	EA702_RS01610	3.94 E-10	type_II_toxin-antitoxin_system_HipA_family_toxin
CRO	Kmers	CATTGGCATAGCAATATCGCG	Kmer	EA702_RS01405	3.94 E-10	flavin_reductase
CRO	Kmers	AAAAAGAATTGAAAAAATAGC	Kmer	EA702_RS05820	3.94 E-10	site-specific_integrase
CRO	Kmers	GAATATCACAGCCTTTTGCAA	Kmer	EA686_08465	3.94 E-10	thiamine_pyrophosphate-dependent_dehydrogenase_E1_component_subunit_alpha
CRO	Kmers	GGCCCTAATTCCTGCGCTAAA	Kmer	EA702_RS09865	3.94 E-10	SDR_family_oxidoreductase
CRO	Kmers	GCATCAACTGGTGGCTCGTGA	Kmer	EA722_RS02160	3.94 E-10	ATP-dependent_DNA_helicase_RecG
CRO	Kmers	AAGGCCAGCTCATTACTATTC	Kmer	EA686_00900	3.94 E-10	multidrug_efflux_RND_transporter_permease_subunit_AdeB
CRO	Kmers	GTTAACTGGCTTAATGGCTGA	Kmer	EA722_RS14620	3.94 E-10	alpha/beta_fold_hydrolase
CRO	Kmers	TGACTTAATGGCTGAGCTGCA	Kmer	EA686_17650	3.94 E-10	alpha/beta_fold_hydrolase
CRO	Kmers	CATCATAATATAATGTGCTGA	Kmer	EA686_00535	3.94 E-10	putative_pilus_assembly_protein_FilE
CRO	Kmers	ACGAACCAGATGAGAGGTGAA	Kmer	EA686_08280	3.94 E-10	ABC_transporter_substrate-binding_protein
CRO	Kmers	GATAGCAAGGCTAAACTCGAA	Kmer	EA677_03175	3.94 E-10	type_I-F_CRISPR-associated_protein_Csy2
CRO	Kmers	AATTTTCTAAATTCAAATATA	Kmer	EA732_RS09010	3.94 E-10	hypothetical_protein
CRO	Kmers	ATACGTCTTACTATGCGACGG	Kmer	EA686_22920	3.94 E-10	PaaI_family_thioesterase
CRO	Kmers	GTCAATGGAATCACGCGCTCA	Kmer	EA722_RS14260	3.94 E-10	glutamine--tRNA_ligase/YqeY_domain_fusion_protein
CRO	Kmers	AGATAAAATTAAAACCGGTTC	Kmer	EA722_RS04430	3.94 E-10	alpha/beta_hydrolase
CRO	Kmers	GGCGCAATACTTTTTTCAATA	Kmer	EA722_RS13850	3.94 E-10	4-hydroxybenzoate_3-monooxygenase
CRO	Kmers	CCAGCCGCGATAACGAAAATC	Kmer	EA686_15135	3.94 E-10	hypothetical_protein
CRO	Kmers	CTCATTACTAGAAGCAAAAGA	Kmer	EA686_00535	3.94 E-10	putative_pilus_assembly_protein_FilE
CRO	Kmers	ACCCCTTGAGGTTCACCATAA	Kmer	EA722_RS12880	3.94 E-10	PLP-dependent_aminotransferase_family_protein
CRO	Kmers	AACGCGATTAAAATGGGGAAT	Kmer	EA722_RS16115	3.94 E-10	NCS1_family_nucleobase:cation_symporter-1
CRO	Kmers	AAAGGCCTGTTCAAAACAGGC	Kmer	EA679_RS05075	3.94 E-10	amidophosphoribosyltransferase
CRO	Kmers	GGGCCGCGATGCCTTACTTGA	Kmer	EA722_RS00190	3.94 E-10	phosphogluconate_dehydratase
CRO	Kmers	TTGCTTCTTTTTATTAATAAA	Kmer	EA702_RS06385	3.94 E-10	LTA_synthase_family_protein
CRO	Kmers	AAAAGATTGCTGACCATAGGT	Kmer	EA722_RS00835	3.94 E-10	hypothetical_protein
CRO	Kmers	CACCAAGTCGGCCGGGTGCAA	Kmer	EA686_00900	3.94 E-10	multidrug_efflux_RND_transporter_permease_subunit_AdeB
CRO	Kmers	CACCACACTACTGTGCTCACG	Kmer	EA722_RS06550	3.94 E-10	GntR_family_transcriptional_regulator
CRO	Kmers	TAAGTTTGTTCAGTTAGATAA	Kmer	EA735_RS06775	3.94 E-10	hypothetical_protein
CRO	Kmers	AATCAGGGACAAATTCAAATT	Kmer	EA686_00535	3.94 E-10	putative_pilus_assembly_protein_FilE
CRO	Kmers	AAAGTAAACCCTGTTCTTGCT	Kmer	EA686_01165	3.94 E-10	citrate_(Si)-synthase
CRO	Kmers	TTAGATTCATATCCCATGCAA	Kmer	EA664_RS12120	3.94 E-10	DUF4102_domain-containing_protein
CRO	Kmers	AGACGTTTCTCAATTTCAGCA	Kmer	EA702_RS15935	3.94 E-10	Lon_protease
CRO	Kmers	ATTTCTGCCGCGGTTTTAGAC	Kmer	EA686_04885	3.94 E-10	LysR_family_transcriptional_regulator
CRO	Kmers	AAGAGCAGTCATATCGTTTGA	Kmer	EA722_RS17530	3.94 E-10	molecular_chaperone
CRO	Kmers	TAAAAAGGCAATAAAGATAAA	Kmer	EA672_RS14835	3.94 E-10	ABC_transporter_permease
CRO	Kmers	AACCATTAGAAGTTCGTATGG	Kmer	EA686_09495	3.94 E-10	50S_ribosomal_protein_L16
CRO	Kmers	TATGTGCATCTGGTGGCAACA	Kmer	EA722_RS15275	3.94 E-10	class_I_SAM-dependent_methyltransferase
CRO	Kmers	TGGTCAATTAGAACTGGTGAA	Kmer	EA722_RS03185	3.94 E-10	D-lactate_dehydrogenase
CRO	Kmers	AATTCCCGAATACCAGAAATG	Kmer	EA702_RS06385	3.94 E-10	LTA_synthase_family_protein
CRO	Kmers	GAATTGGTGGGCCGGGCCGTA	Kmer	EA686_04935	3.94 E-10	VWA_domain-containing_protein
CRO	Kmers	CTTCCAATTATTGCTGTGCTC	Kmer	EA686_05220	3.94 E-10	EamA_family_transporter
CRO	Kmers	TACAACTATTTCCACTCTAAA	Kmer	EA686_10055	3.94 E-10	TetR/AcrR_family_transcriptional_regulator
CRO	Kmers	AAAACCGTACTAGCGGGCTTC	Kmer	EA686_24895	3.94 E-10	DUF1852_family_protein
CRO	Kmers	GCTTTACCTTATTATTTAAAA	Kmer	EA722_RS03210	3.94 E-10	LTA_synthase_family_protein
CRO	Kmers	AGTCGCATCTTTGGTTGCTAG	Kmer	EA722_RS00040	3.94 E-10	AdeC/AdeK/OprM_family_multidrug_efflux_complex_outer_membrane_factor
CRO	Kmers	AGGCGTCATCATAATATAATG	Kmer	EA686_00535	3.94 E-10	putative_pilus_assembly_protein_FilE
CRO	Kmers	ATTTGGGCCAATATGCGGGAC	Kmer	EA686_14215	3.94 E-10	aminoacyl-tRNA_hydrolase
CRO	Kmers	CAGCTCTTTACGGTCGGGTAA	Kmer	EA722_RS08370	3.94 E-10	excinuclease_ABC_subunit_UvrC
CRO	Kmers	CTATTTAAATGTTAAGTTCAG	Kmer	EA686_14625	3.94 E-10	OsmC_family_peroxiredoxin
CRO	Kmers	GCAACAATATTTATTTAGTAA	Kmer	EA702_RS06385	3.94 E-10	LTA_synthase_family_protein
CRO	Kmers	CTCAAGGGCAATTGTCTAGTC	Kmer	EA686_00900	3.94 E-10	multidrug_efflux_RND_transporter_permease_subunit_AdeB
CRO	Kmers	CTTATCAAACACGAATCGGAC	Kmer	EA702_RS01610	3.94 E-10	type_II_toxin-antitoxin_system_HipA_family_toxin
CRO	Kmers	TCGAACAGGCCTTTTTTATAA	Kmer	#N/A	3.94 E-10	intergenic
CRO	Kmers	ATACTTTGCATGAAGAAACTA	Kmer	EA702_RS14835	3.94 E-10	ABC_transporter_substrate-binding_protein
CRO	Kmers	TCATTTTTGGGTAAAAAACGA	Kmer	EA742_RS16375	3.94 E-10	phytanoyl-CoA_dioxygenase
CRO	Kmers	GTTGTACTGGCCTTCAGGTAA	Kmer	EA686_16395	3.94 E-10	hypothetical_protein
CRO	Kmers	AAGACTCTACTGTTGTTTTAG	Kmer	EA686_00535	3.94 E-10	putative_pilus_assembly_protein_FilE
CRO	Kmers	AAACCATCAGGCATAAGGTAA	Kmer	EA686_00535	3.94 E-10	putative_pilus_assembly_protein_FilE
CRO	Kmers	AAGGCGTCATCATAATATAAT	Kmer	EA686_00535	3.94 E-10	putative_pilus_assembly_protein_FilE
CRO	Kmers	AATCTAAACTCAAAAAGTTAG	Kmer	EA722_RS06635	3.94 E-10	SAM-dependent_methyltransferase
CRO	Kmers	ATGGTGCTGGCATAGTAATGA	Kmer	EA702_RS01980	3.94 E-10	hypothetical_protein
CRO	Kmers	ACGGCGCAATACTTTTTTCAA	Kmer	EA722_RS13850	3.94 E-10	4-hydroxybenzoate_3-monooxygenase
CRO	Kmers	TTAGCCAAGAAAGAGGCACAA	Kmer	EA686_08200	3.94 E-10	RtcB_family_protein
CRO	Kmers	GTAGGTGAGTTCCCGGAACTA	Kmer	EA722_RS02030	3.94 E-10	glycine--tRNA_ligase_subunit_beta
CRO	Kmers	GGAATGGCTTCTTTGGTTAAA	Kmer	EA686_04350	3.94 E-10	glucose_1-dehydrogenase
CRO	Kmers	AATACAATCTTCACTTAAATT	Kmer	EA696_RS01255	3.94 E-10	TonB-dependent_receptor
CRO	Kmers	TAATTGGTTCCACGGCACTAA	Kmer	EA686_13580	3.94 E-10	amino_acid_permease
CRO	Kmers	AATTGCTGGCATTGGTTTTGT	Kmer	EA686_03635	3.94 E-10	acyl-CoA_carboxylase_subunit_beta
CRO	Kmers	CGATTAATTTATTTACTCGAA	Kmer	EA702_RS08950	3.94 E-10	amino_acid_ABC_transporter_permease
CRO	Kmers	CGACCGTAAAGAGCTGGAAGA	Kmer	EA722_RS08370	3.94 E-10	excinuclease_ABC_subunit_UvrC
CRO	Kmers	AACGCTTTTTCTGCCGGGTCT	Kmer	EA686_26415	3.94 E-10	succinate_dehydrogenase_assembly_factor_2
CRO	Kmers	GAGTTCCTCACCTTTTAAGTA	Kmer	EA686_00345	3.94 E-10	type_I_secretion_C-terminal_target_domain-containing_protein
CRO	Kmers	ATGTTTACCTTGTAAAACATG	Kmer	EA722_RS11160	3.94 E-10	UDP-N-acetylmuramate:L-alanyl-gamma-D-glutamyl-_meso-diaminopimelate_ligase
CRO	Kmers	ATCGAGTAAGCGATGCGCACC	Kmer	EA722_RS16665	3.94 E-10	divalent_metal_cation_transporter
CRO	Kmers	CTGTTCAGCATTTAAAAGTTA	Kmer	EA686_00535	3.94 E-10	putative_pilus_assembly_protein_FilE
CRO	Kmers	AACGATAGCAAGGCTCAACTG	Kmer	EA729_RS00435	3.94 E-10	methionine_ABC_transporter_ATP-binding_protein
CRO	Kmers	GCTTTTCAATCGACAAACTCA	Kmer	EA686_00535	3.94 E-10	putative_pilus_assembly_protein_FilE
CRO	Kmers	AATATTACGATCCAAACTGAA	Kmer	EA686_14625	3.94 E-10	OsmC_family_peroxiredoxin
CRO	Kmers	AACCCGCAATCACAGCTAAGG	Kmer	EA686_04875	3.94 E-10	DUF2474_domain-containing_protein
CRO	Kmers	AAATTACACGTTGGATTTTCA	Kmer	EA702_RS06385	3.94 E-10	LTA_synthase_family_protein
CRO	Kmers	AATTACCGAAAAACCATTAGA	Kmer	EA686_09495	3.94 E-10	50S_ribosomal_protein_L16
CRO	Kmers	GAAGCAAGCCAGCGTGGTGAC	Kmer	EA702_RS06585	3.94 E-10	MFS_transporter
CRO	Kmers	AATAAGTAGGGTAGCTAAATG	Kmer	#N/A	3.94 E-10	intergenic
CRO	Kmers	ATAAAGTGACTGTTGAATGCC	Kmer	EA702_RS08860	3.94 E-10	PLP-dependent_aminotransferase_family_protein
CRO	Kmers	AGAATATTGAGGAAATAAAGG	Kmer	EA702_RS03435	3.94 E-10	ferrochelatase
CRO	Kmers	GACCCGCTGTTTTTGTCCTCC	Kmer	EA702_RS14850	3.94 E-10	ABC_transporter_ATP-binding_protein
CRO	Kmers	GACTATTTTTAGTCTGTATAC	Kmer	EA726_RS03190	3.94 E-10	aldolase/citrate_lyase
CRO	Kmers	AACTCAGCAAATAGGTCTCCT	Kmer	EA702_RS07940	3.94 E-10	acinetobactin_export_ABC_transporter_permease/ATP-binding_subunit_BarB
CRO	Kmers	CCGAAAACCGTACTAGCGGGC	Kmer	EA686_24895	3.94 E-10	DUF1852_family_protein
CRO	Kmers	ATATTTAATACTTTTTAAAGC	Kmer	EA664_RS09800	3.94 E-10	GNAT_family_N-acetyltransferase
CRO	Kmers	GAATCGGACACATGGTTTGGC	Kmer	EA702_RS01610	3.94 E-10	type_II_toxin-antitoxin_system_HipA_family_toxin
CRO	Kmers	ATCTAAAAGATCCAACCTATC	Kmer	EA686_00215	3.94 E-10	alpha/beta_hydrolase
CRO	Kmers	CTCAGCAAACAACGCTTTTTC	Kmer	EA686_26415	3.94 E-10	succinate_dehydrogenase_assembly_factor_2
CRO	Kmers	AACTAAAGAAGCCATTCCTTA	Kmer	EA722_RS17960	3.94 E-10	glucose_1-dehydrogenase
CRO	Kmers	GCTTTTTTATTTTTAAAAGAA	Kmer	EA686_16535	3.94 E-10	CapA_family_protein
CRO	Kmers	ACTTTATGCCGAGCAATTGGG	Kmer	EA722_RS17835	3.94 E-10	DUF885_domain-containing_protein
CRO	Kmers	ATTTATCTAAAACCGCGGCAG	Kmer	EA722_RS12955	3.94 E-10	LysR_family_transcriptional_regulator
CRO	Kmers	ATTGTTGCTTCTTTTTATTAA	Kmer	EA702_RS06385	3.94 E-10	LTA_synthase_family_protein
CRO	Kmers	AACACGAATCGGACACATGGT	Kmer	EA702_RS01610	3.94 E-10	type_II_toxin-antitoxin_system_HipA_family_toxin
CRO	Kmers	AACGGTAATGCATGTTGCAAC	Kmer	EA722_RS13570	3.94 E-10	MFS_transporter
CRO	Kmers	AAAAGCAAAATTGAAAACGAT	Kmer	EA686_02890	3.94 E-10	glutathione-regulated_potassium-efflux_system_protein_KefB
CRO	Kmers	AAACCACGTGCCGTAATCCGC	Kmer	EA722_RS18770	3.94 E-10	acetyl-CoA_C-acyltransferase_FadA
CRO	Kmers	AAAAAATGAATATTTTTATCA	Kmer	EA667_RS09380	3.94 E-10	histidine_kinase
CRO	Kmers	ATGTTCATTTAAGCCATTGTC	Kmer	EA686_16340	3.94 E-10	uracil_phosphoribosyltransferase
CRO	Kmers	TAAACGAGCACTTTCACTAAA	Kmer	EA722_RS11160	3.94 E-10	UDP-N-acetylmuramate:L-alanyl-gamma-D-glutamyl-_meso-diaminopimelate_ligase
CRO	Kmers	GAAAGGTATTCGCGTTAAAAC	Kmer	EA686_08810	3.94 E-10	branched-chain_amino_acid_transaminase
CRO	Kmers	ATTACTTGTTTGCCCAGCCTA	Kmer	EA686_06960	3.94 E-10	MerR_family_transcriptional_regulator
CRO	Kmers	AATTGAAAACGATTGCTGACC	Kmer	EA686_02890	3.94 E-10	glutathione-regulated_potassium-efflux_system_protein_KefB
CRO	Kmers	AATGCCCTATAAATTTGATCT	Kmer	EA686_08600	3.94 E-10	ATP-binding_protein
CRO	Kmers	TAAATACAATCTTCACTTAAA	Kmer	EA679_RS03545	3.94 E-10	formyltetrahydrofolate_deformylase
CRO	Kmers	CTGGCTCTGGATATACCTAAA	Kmer	EA686_00115	3.94 E-10	transcriptional_regulator
CRO	Kmers	CCACAGCCCACAATTAAGATA	Kmer	EA686_06375	3.94 E-10	class_I_SAM-dependent_methyltransferase
CRO	Kmers	CCAGCAACGATAGCAAGGCTC	Kmer	#N/A	3.94 E-10	intergenic
CRO	Kmers	ATAGTACTGGTAATGTGTCCG	Kmer	EA686_00345	3.94 E-10	type_I_secretion_C-terminal_target_domain-containing_protein
CRO	Kmers	ACATCATCAACAAATTGATAG	Kmer	EA702_RS06385	3.94 E-10	LTA_synthase_family_protein
CRO	Kmers	CAATATATGGATTGGTTTAAA	Kmer	EA686_03620	3.94 E-10	metal-dependent_hydrolase
CRO	Kmers	ACAAATAGGCACTGGCTCTGG	Kmer	EA686_00115	3.94 E-10	transcriptional_regulator
CRO	Kmers	AGCGCAGCTGCAATCATGACC	Kmer	EA702_RS14850	3.94 E-10	ABC_transporter_ATP-binding_protein
CRO	Kmers	CAAAATTTGCTGTATGTCTTG	Kmer	EA702_RS06385	3.94 E-10	LTA_synthase_family_protein
CRO	Kmers	CTTATAAAACTAGTACGTTTA	Kmer	EA686_00370	3.94 E-10	glycerophosphodiester_phosphodiesterase
CRO	Kmers	CAATAATTTTATTTTTTTCTG	Kmer	EA686_00535	3.94 E-10	putative_pilus_assembly_protein_FilE
CRO	Kmers	TGATTAGTCCAAAGATAATAA	Kmer	EA702_RS06385	3.94 E-10	LTA_synthase_family_protein
CRO	Kmers	CATGAAAGCTCAAAAATATGG	Kmer	EA702_RS08360	3.94 E-10	3-hydroxybutyrate_dehydrogenase
CRO	Kmers	GATCATCTGTGGCCCAGCCCC	Kmer	EA702_RS06385	3.94 E-10	LTA_synthase_family_protein
CRO	Kmers	AAATGGTGTTGGAAAAACAAC	Kmer	EA686_19040	3.94 E-10	signal_recognition_particle-docking_protein_FtsY
CRO	Kmers	ACATTCATCAGGCACGCGTAA	Kmer	EA686_01350	3.94 E-10	CHAD_domain-containing_protein
CRO	Kmers	GCATAATGACCTGTTGCAATA	Kmer	EA686_00985	3.94 E-10	tRNA_2-thiouridine(34)_synthase_MnmA
CRO	Kmers	CTTTGGCTGCTGCTCATTTTC	Kmer	EA702_RS06385	3.94 E-10	LTA_synthase_family_protein
CRO	Kmers	AAACAATATATGGATTGGTTT	Kmer	EA686_03620	3.94 E-10	metal-dependent_hydrolase
CRO	Kmers	TCGGTGTTGCCACCAGATGCA	Kmer	EA722_RS15275	3.94 E-10	class_I_SAM-dependent_methyltransferase
CRO	Kmers	TAATTTTATCTGGCTTAGGTA	Kmer	EA722_RS04430	3.94 E-10	alpha/beta_hydrolase
CRO	Kmers	TTTAAAAACTTATTTATAAAA	Kmer	EA675_RS04285	3.94 E-10	hypothetical_protein
CRO	Kmers	GGTAAACCTAAGCAACATTTA	Kmer	EA722_RS19575	3.94 E-10	PLD-like_domain_protein
CRO	Kmers	ATGCGTGGAACACGTATCCAG	Kmer	EA702_RS03205	3.94 E-10	transcription_termination/antitermination_protein_NusA
CRO	Kmers	TTCTCATTACTAGAAGCAAAA	Kmer	EA686_00535	3.94 E-10	putative_pilus_assembly_protein_FilE
CRO	Kmers	AAATAACCTGACACGTTACCA	Kmer	EA686_04220	3.94 E-10	type_I_secretion_protein
CRO	Kmers	TAAGTACTTATACTGCTGGAA	Kmer	EA702_RS06385	3.94 E-10	LTA_synthase_family_protein
CRO	Kmers	CATAGTGACCTGTTGCAATAA	Kmer	EA722_RS10860	3.94 E-10	tRNA_2-thiouridine(34)_synthase_MnmA
CRO	Kmers	AAAAGCTCTCTCTCAGAGCCA	Kmer	EA722_RS06415	3.94 E-10	cache_protein
CRO	Kmers	AGTAAAAAGGGTATGAAAATA	Kmer	EA702_RS17660	3.94 E-10	hypothetical_protein
CRO	Kmers	ATTAGTTTGATTGTACTTCTG	Kmer	EA722_RS06665	3.94 E-10	amino_acid_permease
CRO	Kmers	CCTCATTGCTGTACGCAAAGA	Kmer	EA702_RS06385	3.94 E-10	LTA_synthase_family_protein
CRO	Kmers	CAACATTTAAGGAATTATCTA	Kmer	EA686_27440	3.94 E-10	hypothetical_protein
CRO	Kmers	CGGCATATTGACATCCAGCAG	Kmer	EA722_RS02825	3.94 E-10	response_regulator
CRO	Kmers	CCTGAATTTTGGACATCTCAA	Kmer	EA722_RS17025	3.94 E-10	DNA_mismatch_repair_endonuclease_MutL
CRO	Kmers	AGAAAATGAGCAGCAGCCAAA	Kmer	EA702_RS06385	3.94 E-10	LTA_synthase_family_protein
CRO	Kmers	AAGGCCATAAAATTTTTTTAT	Kmer	EA686_00540	3.94 E-10	protein_FilF
CRO	Kmers	CTATGGTCAGCAATCTTTTTC	Kmer	EA722_RS00835	3.94 E-10	hypothetical_protein
CRO	Kmers	GACTTAATCGAATCAAAAATA	Kmer	EA702_RS06385	3.94 E-10	LTA_synthase_family_protein
CRO	Kmers	AAAGCATTGTTTGCTGAGTTG	Kmer	EA722_RS02380	3.94 E-10	succinate_dehydrogenase_assembly_factor_2
CRO	Kmers	AGTTTCGTTGCTCCAAAATTA	Kmer	EA702_RS06385	3.94 E-10	LTA_synthase_family_protein
CRO	Kmers	GAGAACTATGCGTCTTCTCTC	Kmer	EA686_03965	3.94 E-10	magnesium_transporter
CRO	Kmers	CCACTAAACCGTCACGAGTAG	Kmer	EA686_20745	3.94 E-10	catechol_1,2-dioxygenase
CRO	Kmers	TGGCTTCTTTGGTTAAATAAA	Kmer	EA686_04350	3.94 E-10	glucose_1-dehydrogenase
CRO	Kmers	CGATGCGCACCTGCGTAACAG	Kmer	EA722_RS16665	3.94 E-10	divalent_metal_cation_transporter
CRO	Kmers	TTCAATGCCTTGTTTTGGCAA	Kmer	EA722_RS01405	3.94 E-10	aminotransferase_class_I/II-fold_pyridoxal_phosphate-dependent_enzyme
CRO	Kmers	TGCTCAACTGGTACACCATAA	Kmer	EA702_RS13335	3.94 E-10	fructose-bisphosphate_aldolase_class_II
CRO	Kmers	ATTAAATTTGATATTCATGCA	Kmer	EA722_RS05525	3.94 E-10	3-deoxy-D-manno-octulosonic_acid_transferase
CRO	Kmers	AAACATACCTACCAAGTTTGA	Kmer	EA686_01080	3.94 E-10	bile_acid:sodium_symporter
CRO	Kmers	GCCGTCGCATAGTAAGACGTA	Kmer	EA686_22920	3.94 E-10	PaaI_family_thioesterase
CRO	Kmers	CGGCTTAGGATGACATTGAAC	Kmer	EA702_RS08260	3.94 E-10	polyphosphate_kinase_1
CRO	Kmers	AGTGCGCCCCAAACCATCAGG	Kmer	EA686_00535	3.94 E-10	putative_pilus_assembly_protein_FilE
CRO	Kmers	CAGCTCACAGGTTCTGATGCA	Kmer	EA686_06610	3.94 E-10	taurine_ABC_transporter_substrate-binding_protein
CRO	Kmers	ACGAGCATAATGACCTGTTGC	Kmer	EA686_00985	3.94 E-10	tRNA_2-thiouridine(34)_synthase_MnmA
CRO	Kmers	ATTTTTGAACAGGAATGTTTG	Kmer	EA686_07915	3.94 E-10	exonuclease_V_subunit_amma
CRO	Kmers	AATTAAAACACCATCAATAAC	Kmer	EA686_24260	3.94 E-10	hypothetical_protein
CRO	Kmers	ATCTTGTCGCACAGCTTTTGA	Kmer	EA722_RS06500	3.94 E-10	tannase/feruloyl_esterase_family_alpha/beta_hydrolase
CRO	Kmers	AAACAAGATATTATCGCTGTA	Kmer	EA686_18045	3.94 E-10	adenosine_deaminase
CRO	Kmers	AATTGCTTACTCACAAGATTG	Kmer	EA722_RS02155	3.94 E-10	ComF_family_protein
CRO	Kmers	CAACGGTGATGCATGTTGCAA	Kmer	EA686_06090	3.94 E-10	SmvA_family_efflux_MFS_transporter
CRO	Kmers	AAATTAGCTAATAATTGATAA	Kmer	EA686_13030	3.94 E-10	sodium-dependent_transporter
CRO	Kmers	ACCCATCCATAAACCCAGCGG	Kmer	EA722_RS16130	3.94 E-10	taurine_ABC_transporter_permease_TauC
CRO	Kmers	ACCTTTTACAACTATTTCCAC	Kmer	EA686_10055	3.94 E-10	TetR/AcrR_family_transcriptional_regulator
CRO	Kmers	ATAAAAAAGGCCTGTTCGAAA	Kmer	#N/A	3.94 E-10	intergenic
CRO	Kmers	CTTTCAATGGCTTCCGTGGCC	Kmer	EA686_00535	3.94 E-10	putative_pilus_assembly_protein_FilE
CRO	Kmers	ATGTCTCTAAACTAAAAAAAC	Kmer	EA702_RS06385	3.94 E-10	LTA_synthase_family_protein
CRO	Kmers	AACTCTTCTTGCAAGGCTTTA	Kmer	EA686_19040	3.94 E-10	signal_recognition_particle-docking_protein_FtsY
CRO	Kmers	GTGAGCGCGTGATTCCATTGA	Kmer	EA722_RS14260	3.94 E-10	glutamine--tRNA_ligase/YqeY_domain_fusion_protein
CRO	Kmers	GTAGGGCTAGCCGGAAGCACA	Kmer	EA686_01130	3.94 E-10	ParA_family_protein
CRO	Kmers	AGAAAAATTAAATACTGCACC	Kmer	EA686_00535	3.94 E-10	putative_pilus_assembly_protein_FilE
CRO	Kmers	CAGGTTCTGATGCAAAAGATA	Kmer	EA686_06610	3.94 E-10	taurine_ABC_transporter_substrate-binding_protein
CRO	Kmers	CAATTTGGGAAGGCTTTACTC	Kmer	EA722_RS06130	3.94 E-10	AEC_family_transporter
CRO	Kmers	ATTTAAGCCATTATCAATAGA	Kmer	EA702_RS03660	3.94 E-10	uracil_phosphoribosyltransferase
CRO	Kmers	AATTTCAGCAACGTCATCTTC	Kmer	EA702_RS15935	3.94 E-10	Lon_protease
CRO	Kmers	ATGCAAGGTATATTGCCCAGA	Kmer	EA686_04090	3.94 E-10	ABC_transporter_substrate-binding_protein
CRO	Kmers	GGTTTAGTAGCAACAGCAGTA	Kmer	EA722_RS04715	3.94 E-10	catechol_1,2-dioxygenase
CRO	Kmers	AGCTAAACCAATCAAACCTAA	Kmer	EA686_17180	3.94 E-10	DMT_family_transporter
CRO	Kmers	CATGACCCGCTGTTTTTGTCC	Kmer	EA702_RS14850	3.94 E-10	ABC_transporter_ATP-binding_protein
CRO	Kmers	GCTTACTCACAAGATTGGCAA	Kmer	EA722_RS02155	3.94 E-10	ComF_family_protein
CRO	Kmers	AGATAAAGGCGTCATCATAAT	Kmer	EA686_00535	3.94 E-10	putative_pilus_assembly_protein_FilE
CRO	Kmers	TCTTTACGGTCGGGTAAGGCA	Kmer	EA722_RS08370	3.94 E-10	excinuclease_ABC_subunit_UvrC
CRO	Kmers	CGTATTGGTACAGCTGAAACC	Kmer	EA686_28060	3.94 E-10	copper_oxidase
CRO	Kmers	AGATCTAACCATCTCATGCCA	Kmer	EA722_RS09720	3.94 E-10	GGDEF_domain-containing_protein
CRO	Kmers	CAACTTTATGCGTTGCGATAG	Kmer	EA686_00535	3.94 E-10	putative_pilus_assembly_protein_FilE
CRO	Kmers	ACGATAGCAAGGCTCAACTGG	Kmer	EA729_RS00435	3.94 E-10	methionine_ABC_transporter_ATP-binding_protein
CRO	Kmers	CTAAATAAATATTGTTGCTTC	Kmer	EA702_RS06385	3.94 E-10	LTA_synthase_family_protein
CRO	Kmers	AATCAATCTCGCTACGTTTAT	Kmer	EA702_RS01610	3.94 E-10	type_II_toxin-antitoxin_system_HipA_family_toxin
CRO	Kmers	AATCGAATCAAAAATAAGATC	Kmer	EA702_RS06385	3.94 E-10	LTA_synthase_family_protein
CRO	Kmers	CCGGCATATTGACATCCAGCA	Kmer	EA722_RS02825	3.94 E-10	response_regulator
CRO	Kmers	CCTACGCTTGGTGCTCTTGAA	Kmer	EA722_RS10480	3.94 E-10	ParA_family_protein
CRO	Kmers	AGCAAATCTTATCCTTCGACT	Kmer	EA686_00535	3.94 E-10	putative_pilus_assembly_protein_FilE
CRO	Kmers	ATAATAAGGTAAAGCATAAAT	Kmer	EA702_RS06385	3.94 E-10	LTA_synthase_family_protein
CRO	Kmers	CAGCAGACTTCGGAATATGGA	Kmer	EA686_23920	3.94 E-10	TonB-dependent_siderophore_receptor
CRO	Kmers	ACTGTTAAGGCCGAAGATGTA	Kmer	EA702_RS16455	3.94 E-10	cysteine_hydrolase
CRO	Kmers	AAAATCATATAGAGCACAGCA	Kmer	EA686_05220	3.94 E-10	EamA_family_transporter
CRO	Kmers	AAATTTGATCTTGCAGATGTT	Kmer	EA686_08600	3.94 E-10	ATP-binding_protein
CRO	Kmers	CCTGACGTGCAGCCAGACTCA	Kmer	EA686_01005	3.94 E-10	outer_membrane_lipoprotein-sorting_protein
CRO	Kmers	AATGCTGCGGGTGAGGTTGTA	Kmer	EA686_04220	3.94 E-10	type_I_secretion_protein
CRO	Kmers	CACAAAAGGTATAAGGTCCCC	Kmer	EA722_RS11595	3.94 E-10	(2,3-dihydroxybenzoyl)adenylate_synthase
CRO	Kmers	AAAGTTGTTTTAGATAGGTTG	Kmer	EA686_00215	3.94 E-10	alpha/beta_hydrolase
CRO	Kmers	ATATTATTATCTTTGGACTAA	Kmer	EA702_RS06385	3.94 E-10	LTA_synthase_family_protein
CRO	Kmers	AATATAATGTGCTGAAGGCGG	Kmer	EA686_00535	3.94 E-10	putative_pilus_assembly_protein_FilE
CRO	Kmers	GTTTAATTTACTTAAATTTTA	Kmer	EA702_RS06385	3.94 E-10	LTA_synthase_family_protein
CRO	Kmers	CGTGGCCATAAGTTTACTTCC	Kmer	EA686_00535	3.94 E-10	putative_pilus_assembly_protein_FilE
CRO	Kmers	AGATAAGTGCTTTATTAAAGA	Kmer	EA686_00535	3.94 E-10	putative_pilus_assembly_protein_FilE
CRO	Kmers	GGCGGTTGAGAAGTTTGAAAA	Kmer	EA686_18630	3.94 E-10	Lrp/AsnC_family_transcriptional_regulator
CRO	Kmers	ACGTTACCAGCGCCATCCACA	Kmer	EA686_04220	3.94 E-10	type_I_secretion_protein
CRO	Kmers	GCAAAGCTTGGCGTATTGCAC	Kmer	EA722_RS01605	3.94 E-10	aldehyde_dehydrogenase
CRO	Kmers	AAACTCGGTAATCACTCGCCA	Kmer	EA722_RS07740	3.94 E-10	nicotinate_phosphoribosyltransferase
CRO	Kmers	ATCCAGTCATTTCTGGTATTC	Kmer	EA702_RS06385	3.94 E-10	LTA_synthase_family_protein
CRO	Kmers	CAAGTTTTTGTGTAATTTGCG	Kmer	EA702_RS01610	3.94 E-10	type_II_toxin-antitoxin_system_HipA_family_toxin
CRO	Kmers	CTGAAGGTGTAAACGGATATA	Kmer	EA686_03980	3.94 E-10	heme-binding_protein
CRO	Kmers	TAAATGGTGTTGGAAAAACAA	Kmer	EA686_19040	3.94 E-10	signal_recognition_particle-docking_protein_FtsY
CRO	Kmers	ACAAAATCATATAGAGCACAG	Kmer	EA686_05220	3.94 E-10	EamA_family_transporter
CRO	Kmers	TACTACATTGGTTAAGTTCTA	Kmer	EA686_19205	3.94 E-10	glycosyltransferase_family_39_protein
CRO	Kmers	CGATAAAGAGAAAAACGAGCC	Kmer	EA686_11555	3.94 E-10	long-chain-acyl-CoA_synthetase
CRO	Kmers	AGGGACAAATTCAAATTTCGG	Kmer	EA686_00535	3.94 E-10	putative_pilus_assembly_protein_FilE
CRO	Kmers	ACGTGGTCAACACCAAAGTTA	Kmer	EA686_00570	3.94 E-10	peptide_chain_release_factor_3
CRO	Kmers	AAGCGGTTTTACCTTATGCCT	Kmer	EA686_00535	3.94 E-10	putative_pilus_assembly_protein_FilE
CRO	Kmers	CATGGCGTGAATGTCACAGCC	Kmer	EA722_RS09235	3.94 E-10	thiamine_pyrophosphate-dependent_dehydrogenase_E1_component_subunit_alpha
CRO	Kmers	CACTGAATCAGTAGAGCGGAA	Kmer	EA686_00535	3.94 E-10	putative_pilus_assembly_protein_FilE
CRO	Kmers	CAGGTCAAGTAGGACGCGATG	Kmer	EA686_01895	3.94 E-10	phosphogluconate_dehydratase
CRO	Kmers	AAATGTGTAATTAATTTATAT	Kmer	EA686_07030	3.94 E-10	TetR/AcrR_family_transcriptional_regulator
CRO	Kmers	AGTCGATCAACTTTAGATCAG	Kmer	EA686_00535	3.94 E-10	putative_pilus_assembly_protein_FilE
CRO	Kmers	ATCGTAATAAGGTATATCCAG	Kmer	EA702_RS06385	3.94 E-10	LTA_synthase_family_protein
CRO	Kmers	CTTAATCGAATCAAAAATAAG	Kmer	EA702_RS06385	3.94 E-10	LTA_synthase_family_protein
CRO	Kmers	GCGATTAAAGCCAAACAAGAA	Kmer	EA686_14275	3.94 E-10	fumarate_reductase/succinate_dehydrogenase_flavoprotein_subunit
CRO	Kmers	CGTCACCATGAGGAGCTTGGA	Kmer	EA686_13360	3.94 E-10	amino_acid_permease
CRO	Kmers	ATTGGTCCACTCAGTGTGGCC	Kmer	EA686_05215	3.94 E-10	EamA_family_transporter
CRO	Kmers	ATTACTTGCCAATCTTGTGAG	Kmer	EA722_RS02155	3.94 E-10	ComF_family_protein
CRO	Kmers	AAAATCAATTAAAACGCTTAG	Kmer	EA686_00535	3.94 E-10	putative_pilus_assembly_protein_FilE
CRO	Kmers	TAGTGACCTGTTGCAATAAAA	Kmer	EA722_RS10860	3.94 E-10	tRNA_2-thiouridine(34)_synthase_MnmA
CRO	Kmers	GCAGCTTGTAGAAGCGATTAA	Kmer	EA702_RS13335	3.94 E-10	fructose-bisphosphate_aldolase_class_II
CRO	Kmers	CGTTCCTCCACCAATAAAGAG	Kmer	EA686_00535	3.94 E-10	putative_pilus_assembly_protein_FilE
CRO	Kmers	ACAGGTCACTATGCTCGTCGT	Kmer	EA722_RS10860	3.94 E-10	tRNA_2-thiouridine(34)_synthase_MnmA
CRO	Kmers	CATAGACGTTTTATCTGAAGA	Kmer	EA702_RS11660	3.94 E-10	UDP-N-acetylmuramate_dehydrogenase
CRO	Kmers	CTCAAAAATATGGTCGTATTA	Kmer	EA702_RS08360	3.94 E-10	3-hydroxybutyrate_dehydrogenase
CRO	Kmers	TACCCTTTTTACTTTGCCTAA	Kmer	EA686_26935	3.94 E-10	glycosyltransferase
CRO	Kmers	CAATTATTGGGCCAGATGGGC	Kmer	EA686_00535	3.94 E-10	putative_pilus_assembly_protein_FilE
CRO	Kmers	CAGCAATTCGCGACAGGTCAA	Kmer	EA686_01895	3.94 E-10	phosphogluconate_dehydratase
CRO	Kmers	CTGATTCAGTGCGCCCCAAAC	Kmer	EA686_00535	3.94 E-10	putative_pilus_assembly_protein_FilE
CRO	Kmers	ATTGAGAAACGTCTTGCTGAA	Kmer	EA702_RS15935	3.94 E-10	Lon_protease
CRO	Kmers	GGTGGAGGAACGAGAACTAAC	Kmer	EA686_00535	3.94 E-10	putative_pilus_assembly_protein_FilE
CRO	Kmers	GGGTTTTCTTGTTTGGCTTTA	Kmer	EA686_14275	3.94 E-10	fumarate_reductase/succinate_dehydrogenase_flavoprotein_subunit
CRO	Kmers	CCAAACATCATCTTTCCCGTA	Kmer	EA722_RS13320	3.94 E-10	1-aminocyclopropane-1-carboxylate_deaminase/D-cysteine_desulfhydrase
CRO	Kmers	ACAGGAACAGGTAAGACTGCT	Kmer	EA686_16640	3.94 E-10	DEAD/DEAH_box_helicase
CRO	Kmers	ATGAATAAAAAAATTTTATGG	Kmer	EA686_00540	3.94 E-10	protein_FilF
CRO	Kmers	GCGATAAAATTGGGCGCAAGA	Kmer	EA722_RS13100	3.94 E-10	MFS_transporter
CRO	Kmers	AGCTGAAGTGCAGTTAACTTG	Kmer	EA686_28070	3.94 E-10	primosomal_protein_N'
CRO	Kmers	ACAGTAGAGTCTTGGTCTTGA	Kmer	EA686_00535	3.94 E-10	putative_pilus_assembly_protein_FilE
CRO	Kmers	AAAATTTTTGGCGTTTTTTAT	Kmer	EA722_RS13485	3.94 E-10	DedA_family_protein
CRO	Kmers	GATCAACTTTACCCTGTTCCA	Kmer	EA702_RS14055	3.94 E-10	LysR_family_transcriptional_regulator
CRO	Kmers	CGAGCACTTTCACTAAAACCA	Kmer	EA722_RS11160	3.94 E-10	UDP-N-acetylmuramate:L-alanyl-gamma-D-glutamyl-_meso-diaminopimelate_ligase
CRO	Kmers	GCAATACTTTTTTCAATAGAA	Kmer	EA722_RS13850	3.94 E-10	4-hydroxybenzoate_3-monooxygenase
CRO	Kmers	AACAGGTCATTATGCTCGTCG	Kmer	EA686_00985	3.94 E-10	tRNA_2-thiouridine(34)_synthase_MnmA
CRO	Kmers	AAGTAAACTTATGGCCACGGA	Kmer	EA686_00535	3.94 E-10	putative_pilus_assembly_protein_FilE
CRO	Kmers	ATTGGGCGAGCACAGACAGGA	Kmer	EA686_16640	3.94 E-10	DEAD/DEAH_box_helicase
CRO	Kmers	CACTGGTTGCTATGCTAATGA	Kmer	EA722_RS14235	3.94 E-10	hypothetical_protein
CRO	Kmers	AATCAGTAGTGGTTTAATTTA	Kmer	EA702_RS06385	3.94 E-10	LTA_synthase_family_protein
CRO	Kmers	CATCAGCATTGGCCGCAAATG	Kmer	EA722_RS07770	3.94 E-10	GH3_auxin-responsive_promoter
CRO	Kmers	AATTTGCGCCCACCGGTATTC	Kmer	EA702_RS01610	3.94 E-10	type_II_toxin-antitoxin_system_HipA_family_toxin
CRO	Kmers	GTAACAGCCGATTCGTTAATA	Kmer	EA722_RS12555	3.94 E-10	K(+)-transporting_ATPase_subunit_B
CRO	Kmers	AAGGTTCAATACGCATATTGA	Kmer	EA686_24350	3.94 E-10	FAD-dependent_oxidoreductase
CRO	Kmers	AATGCCCTATAAATTTGACCT	Kmer	EA722_RS02735	3.94 E-10	ATP-dependent_protease
CRO	Kmers	AGCCTTTCTTGATAATACAGC	Kmer	EA686_04220	3.94 E-10	type_I_secretion_protein
CRO	Kmers	GATAAAACGTCTATGCCCTGA	Kmer	EA702_RS11660	3.94 E-10	UDP-N-acetylmuramate_dehydrogenase
CRO	Kmers	ATCGCTTCTACAAGCTGTTCA	Kmer	EA686_21430	3.94 E-10	fructose-bisphosphate_aldolase_class_II
CRO	Kmers	ATCATAATATAATGTGCTGAA	Kmer	EA686_00535	3.94 E-10	putative_pilus_assembly_protein_FilE
CRO	Kmers	TGAATGTCACAGCCTTTTGCA	Kmer	EA722_RS09235	3.94 E-10	thiamine_pyrophosphate-dependent_dehydrogenase_E1_component_subunit_alpha
CRO	Kmers	AGATAAATAACAGTTGTTGAC	Kmer	EA717_RS13195	3.94 E-10	hypothetical_protein
CRO	Kmers	CAGCAATGAGGAGTATGATAA	Kmer	EA702_RS06385	3.94 E-10	LTA_synthase_family_protein
CRO	Kmers	AAATCCTAACTCTGGATATAC	Kmer	EA702_RS06385	3.94 E-10	LTA_synthase_family_protein
CRO	Kmers	AGTATTGGATAATGTAACCAG	Kmer	EA702_RS06385	3.94 E-10	LTA_synthase_family_protein
CRO	Kmers	ACTTCTAATGGTTTTTCGGTA	Kmer	EA686_09495	3.94 E-10	50S_ribosomal_protein_L16
CRO	Kmers	TGCTTCTTTTTATTAATAAAA	Kmer	EA702_RS06385	3.94 E-10	LTA_synthase_family_protein
CRO	Kmers	GAAGAGTTAGTGAATCTTGCA	Kmer	EA722_RS02030	3.94 E-10	glycine--tRNA_ligase_subunit_beta
CRO	Kmers	GTATAAAAACCGTCTGCATAA	Kmer	EA686_00535	3.94 E-10	putative_pilus_assembly_protein_FilE
CRO	Kmers	TCATAGGTTTATTTTCGGAAA	Kmer	EA702_RS06385	3.94 E-10	LTA_synthase_family_protein
CRO	Kmers	GAGCGCTTTCACTAAAACCAA	Kmer	EA686_06000	3.94 E-10	UDP-N-acetylmuramate:L-alanyl-gamma-D-glutamyl-_meso-diaminopimelate_ligase
CRO	Kmers	AATATATGATTGATAATGCCA	Kmer	EA686_00530	3.94 E-10	long-chain_fatty_acid_ABC_transporter
CRO	Kmers	TATTTCTGTATCTTATGCAGA	Kmer	EA686_00535	3.94 E-10	putative_pilus_assembly_protein_FilE
CRO	Kmers	AAAATAAGATCATCTGTGGCC	Kmer	EA702_RS06385	3.94 E-10	LTA_synthase_family_protein
CRO	Kmers	ATATATAACTGTAGAACGTTG	Kmer	EA716_RS15225	3.94 E-10	hypothetical_protein
CRO	Kmers	ATCACTTGTTTGCCCAGCCTA	Kmer	#N/A	3.94 E-10	intergenic
CRO	Kmers	GATATTTTGTACCTTCAATGA	Kmer	EA702_RS01610	3.94 E-10	type_II_toxin-antitoxin_system_HipA_family_toxin
CRO	Kmers	TCACCACCAATAAATGAGAAA	Kmer	EA686_03880	3.94 E-10	hypothetical_protein
CRO	Kmers	ATTATTGCTGTGCTCTATATG	Kmer	EA686_05220	3.94 E-10	EamA_family_transporter
CRO	Kmers	AATCTTGAATTTTTCGGTAAT	Kmer	EA702_RS06385	3.94 E-10	LTA_synthase_family_protein
CRO	Kmers	TAGGGTAGCTAAATGAATAAA	Kmer	EA686_13320	3.94 E-10	hypothetical_protein
CRO	Kmers	ATGTGTCCGGTCACTTCAATC	Kmer	EA686_00345	3.94 E-10	type_I_secretion_C-terminal_target_domain-containing_protein
CRO	Kmers	CAGTTGTTGACGTAGAAAAAC	Kmer	EA686_05305	3.94 E-10	HlyC/CorC_family_transporter
CRO	Kmers	ATCATCAACAAATTGATAGTA	Kmer	EA702_RS06385	3.94 E-10	LTA_synthase_family_protein
CRO	Kmers	CAACCACCAAACGTGAATACA	Kmer	EA722_RS12910	3.94 E-10	malonate_decarboxylase_subunit_alpha
CRO	Kmers	TCACCTTTTAAGTAAACCTGA	Kmer	EA686_00345	3.94 E-10	type_I_secretion_C-terminal_target_domain-containing_protein
CRO	Kmers	GCCACTCGTTGTATTTTTGGA	Kmer	EA686_00535	3.94 E-10	putative_pilus_assembly_protein_FilE
CRO	Kmers	CTTTTTCACATGAAGTTCATC	Kmer	EA708_RS06160	3.94 E-10	hypothetical_protein
CRO	Kmers	ATGTGCATCTGGTGGCAACAC	Kmer	EA722_RS15275	3.94 E-10	class_I_SAM-dependent_methyltransferase
CRO	Kmers	AATTGTTGATGGTAATTTGCA	Kmer	EA722_RS03470	3.94 E-10	pyridoxal-phosphate_dependent_enzyme
CRO	Kmers	AAAAGATCTAACCATCTCATG	Kmer	EA722_RS09720	3.94 E-10	GGDEF_domain-containing_protein
CRO	Kmers	AAATAATAAGGTAAAGCATAA	Kmer	EA702_RS06385	3.94 E-10	LTA_synthase_family_protein
CRO	Kmers	ATGCCTTACTTGAGGCTGAAT	Kmer	EA722_RS00190	3.94 E-10	phosphogluconate_dehydratase
CRO	Kmers	AATTAAAACCGGTTCACCACG	Kmer	EA722_RS04430	3.94 E-10	alpha/beta_hydrolase
CRO	Kmers	ACCAGCGTATTGTTACCTAGT	Kmer	EA702_RS06385	3.94 E-10	LTA_synthase_family_protein
CRO	Kmers	GATTTCATTCAGGCTATACAA	Kmer	EA702_RS07875	3.94 E-10	acinetobactin_non-ribosomal_peptide_synthetase_subunit_BasB
CRO	Kmers	TCTTGTTTGGCTTTAATCGCA	Kmer	EA686_14275	3.94 E-10	fumarate_reductase/succinate_dehydrogenase_flavoprotein_subunit
CRO	Kmers	TATGCGTTTGTCTTCACAAGA	Kmer	EA686_00535	3.94 E-10	putative_pilus_assembly_protein_FilE
CRO	Kmers	AATATATGGATTGGTTTAAAA	Kmer	EA686_03620	3.94 E-10	metal-dependent_hydrolase
CRO	Kmers	CTTTAATAATTTTGGAGCAAC	Kmer	EA702_RS06385	3.94 E-10	LTA_synthase_family_protein
CRO	Kmers	ACCTGTTCCTGTCTGTGCTCG	Kmer	EA686_16640	3.94 E-10	DEAD/DEAH_box_helicase
CRO	Kmers	ATGAATAATACGAACGGCAAT	Kmer	EA702_RS17850	3.94 E-10	ATP-grasp_domain-containing_protein
CRO	Kmers	GTTGACGTAGAAAAACCATGA	Kmer	EA682_RS07385	3.94 E-10	hypothetical_protein
CRO	Kmers	CTGTACCTGTCTGTGCTCGCC	Kmer	EA702_RS14255	3.94 E-10	ATP-dependent_RNA_helicase_RhlB
CRO	Kmers	AAATGTTCTGTTTCTTTAAGT	Kmer	EA702_RS14985	3.94 E-10	arginine_N-succinyltransferase
CRO	Kmers	AAAAAGGCCTGTTCAAAACAG	Kmer	EA679_RS05075	3.94 E-10	amidophosphoribosyltransferase
CRO	Kmers	CTAATATTATTATCTTTGGAC	Kmer	EA702_RS06385	3.94 E-10	LTA_synthase_family_protein
CRO	Kmers	GTTTCAGAGCCTGTTCAACAA	Kmer	EA686_08885	3.94 E-10	DNA_polymerase_III_subunit_amma/tau
CRO	Kmers	CATATAATCTTAAATACTCTA	Kmer	EA686_11975	3.94 E-10	hypothetical_protein
CRO	Kmers	AGCACTATGTACTCCAATAGG	Kmer	EA722_RS02015	3.94 E-10	DMT_family_transporter
CRO	Kmers	CGGTTTTAGATAAATTGCCAC	Kmer	EA722_RS12955	3.94 E-10	LysR_family_transcriptional_regulator
CRO	Kmers	TTAATTACACATTTTATTGAA	Kmer	EA702_RS14635	3.94 E-10	FAD-dependent_oxidoreductase
CRO	Kmers	CTTAGATTTTAGAGTTACTGC	Kmer	EA702_RS12295	3.94 E-10	SGNH/GDSL_hydrolase_family_protein
CRO	Kmers	AGGCAGCAGTCTTACCTGTAC	Kmer	EA702_RS14255	3.94 E-10	ATP-dependent_RNA_helicase_RhlB
CRO	Kmers	GGTAGAACGAAGGCGGGTTGA	Kmer	EA687_RS10590	3.94 E-10	hypothetical_protein
CRO	Kmers	CGTAAGCTTACGCGTGCCTGA	Kmer	EA686_01350	3.94 E-10	CHAD_domain-containing_protein
CRO	Kmers	AAAGCGCTCGTTTAGGCGGTG	Kmer	EA686_06000	3.94 E-10	UDP-N-acetylmuramate:L-alanyl-gamma-D-glutamyl-_meso-diaminopimelate_ligase
CRO	Kmers	ATAAACTGTGTATTATCTAAC	Kmer	EA709_RS18150	3.94 E-10	dTDP-4-dehydrorhamnose_3,5-epimerase
CRO	Kmers	ATTAAAATCAGTGCCATACCA	Kmer	EA722_RS14110	3.94 E-10	ABC_transporter_ATP-binding_protein
CRO	Kmers	TAAATTTTATTAATAAAAAGA	Kmer	EA702_RS06385	3.94 E-10	LTA_synthase_family_protein
CRO	Kmers	ACCTTGCATGAAGAAACTAAT	Kmer	EA686_04090	3.94 E-10	ABC_transporter_substrate-binding_protein
CRO	Kmers	AAAAAGGCCAGCTCATTACTA	Kmer	EA686_00900	3.94 E-10	multidrug_efflux_RND_transporter_permease_subunit_AdeB
CRO	Kmers	TCAGAACCTGTGAGCTGCGCA	Kmer	EA686_06610	3.94 E-10	taurine_ABC_transporter_substrate-binding_protein
CRO	Kmers	ACAGACTCTGGGGTGCGCTTA	Kmer	EA686_15430	3.94 E-10	alkaline_phosphatase
CRO	Kmers	AAACCAATCCCAGCAATTACA	Kmer	EA722_RS14405	3.94 E-10	acetyl-CoA_carboxylase
CRO	Kmers	AGGATTTAACTGTACCAACTC	Kmer	EA686_00535	3.94 E-10	putative_pilus_assembly_protein_FilE
CRO	Kmers	ACTGACTTAATGGCTGAGCTG	Kmer	EA686_17650	3.94 E-10	alpha/beta_fold_hydrolase
CRO	Kmers	AATCTGGGCAATATACCTTGC	Kmer	EA686_04090	3.94 E-10	ABC_transporter_substrate-binding_protein
CRO	Kmers	ACCACCAAACGTGAATACAAC	Kmer	EA722_RS12910	3.94 E-10	malonate_decarboxylase_subunit_alpha
CRO	Kmers	AGGAGTTTTAAAAGTACCGCC	Kmer	EA686_00535	3.94 E-10	putative_pilus_assembly_protein_FilE
CRO	Kmers	GATTGGGCTACTGCTATTTCC	Kmer	EA686_11725	3.94 E-10	penicillin-binding_protein_2
CRO	Kmers	CAAAAATAATGTAGCACTCAA	Kmer	EA730_RS06575	3.94 E-10	MFS_transporter
CRO	Kmers	CGTGTGAAAGGCAACGTCTAC	Kmer	#N/A	3.94 E-10	intergenic
CRO	Kmers	CTAAAAACGAATAAATGGGTA	Kmer	EA686_12520	3.94 E-10	polysaccharide_biosynthesis_protein
CRO	Kmers	AAGTTAGATTCATATCCCATG	Kmer	#N/A	3.94 E-10	intergenic
CRO	Kmers	GATGCAGCTCAGCCATTAAGC	Kmer	EA722_RS14620	3.94 E-10	alpha/beta_fold_hydrolase
CRO	Kmers	CTTACGACGATGTCATTATTA	Kmer	EA722_RS10420	3.94 E-10	nitroreductase_family_protein
CRO	Kmers	ACCGCCGATAATATCAGTTAC	Kmer	EA702_RS18680	3.94 E-10	hypothetical_protein
CRO	Kmers	AAAACTGTTAAAGCCGAAGAT	Kmer	EA686_02400	3.94 E-10	cysteine_hydrolase
CRO	Kmers	CTCACAGGCCAATATCTTTCA	Kmer	EA702_RS16210	3.94 E-10	excinuclease_ABC_subunit_UvrA
CRO	Kmers	AAGCGCTCGTTTAGGCGGTGG	Kmer	EA686_06000	3.94 E-10	UDP-N-acetylmuramate:L-alanyl-gamma-D-glutamyl-_meso-diaminopimelate_ligase
CRO	Kmers	CCGGAACTACAAGGTATTGCG	Kmer	EA722_RS02030	3.94 E-10	glycine--tRNA_ligase_subunit_beta
CRO	Kmers	ACTTAAATTTGGTTTTTTAAA	Kmer	EA686_20350	3.94 E-10	GatB/YqeY_domain-containing_protein
CRO	Kmers	AACTGGCAATACTTCACACGC	Kmer	EA686_12245	3.94 E-10	hypothetical_protein
CRO	Kmers	AATATTTATCAATTATTAGCT	Kmer	EA667_RS16590	3.94 E-10	twin-arginine_translocase_subunit_TatC
CRO	Kmers	AGATGTCGAATCTTGTCGCAC	Kmer	EA722_RS06500	3.94 E-10	tannase/feruloyl_esterase_family_alpha/beta_hydrolase
CRO	Kmers	TCTTATTTTTGATTCGATTAA	Kmer	EA702_RS06385	3.94 E-10	LTA_synthase_family_protein
CRO	Kmers	AAATCCTTCTGTTCAGCATTT	Kmer	EA686_00535	3.94 E-10	putative_pilus_assembly_protein_FilE
CRO	Kmers	CGATTCGTTAATAGTTGCAAA	Kmer	EA722_RS12555	3.94 E-10	K(+)-transporting_ATPase_subunit_B
CRO	Kmers	ACTTGCCTGTTATCATTATGA	Kmer	EA686_20740	3.94 E-10	nitrogen_regulation_protein_NR(I)
CRO	Kmers	ACCGAAAAATTCAAGATTATG	Kmer	EA702_RS06385	3.94 E-10	LTA_synthase_family_protein
CRO	Kmers	CTGCCAAATATTTGGGAACTA	Kmer	EA686_21325	3.94 E-10	MFS_transporter
CRO	Kmers	ATGAAATTATCGGCAGGCCAT	Kmer	EA686_27115	3.94 E-10	FAD-dependent_oxidoreductase
CRO	Kmers	ATAATATAATGTGCTGAAGGC	Kmer	EA686_00535	3.94 E-10	putative_pilus_assembly_protein_FilE
CRO	Kmers	ATTAGCTAATAATTGATAAAT	Kmer	EA686_13030	3.94 E-10	sodium-dependent_transporter
CRO	Kmers	ATCACCACACTACTGTGCTCA	Kmer	EA722_RS06550	3.94 E-10	GntR_family_transcriptional_regulator
CRO	Kmers	AACAATACGCTGGTTACATTA	Kmer	EA702_RS06385	3.94 E-10	LTA_synthase_family_protein
CRO	Kmers	CTTCAGAAGGAATCGTTTTTA	Kmer	EA686_03800	3.94 E-10	protocatechuate_3,4-dioxygenase_subunit_beta
CRO	Kmers	CAAAAAACATCTAAAGAAAAA	Kmer	EA686_00535	3.94 E-10	putative_pilus_assembly_protein_FilE
CRO	Kmers	AACGCCGTGAAAACTGCCGAA	Kmer	EA686_00900	3.94 E-10	multidrug_efflux_RND_transporter_permease_subunit_AdeB
CRO	Kmers	CAGTCATTTCTGGTATTCGGG	Kmer	EA702_RS06385	3.94 E-10	LTA_synthase_family_protein
CRO	Kmers	AGAAGCAAATACTCAAATTGA	Kmer	EA686_04220	3.94 E-10	type_I_secretion_protein
CRO	Kmers	ATAGTTGTAAATTTAGATTTA	Kmer	EA686_00535	3.94 E-10	putative_pilus_assembly_protein_FilE
CRO	Kmers	CGAGCATAATGACCTGTTGCA	Kmer	EA686_00985	3.94 E-10	tRNA_2-thiouridine(34)_synthase_MnmA
CRO	Kmers	AACTCTGGATATACCTTATTA	Kmer	EA702_RS06385	3.94 E-10	LTA_synthase_family_protein
CRO	Kmers	AATGTTCAGGGGCTTTGGTCA	Kmer	EA722_RS12015	3.94 E-10	methyltransferase
CRO	Kmers	AGATTTTAAAGTGGTTGCTGC	Kmer	EA702_RS01320	3.94 E-10	IclR_family_transcriptional_regulator_PcaU
CRO	Kmers	TAAAGCCCGCTGAGAGCACCA	Kmer	EA686_10215	3.94 E-10	malonate_decarboxylase_subunit_alpha
CRO	Kmers	CGCTTTACTTTCTTTGCGTAC	Kmer	EA702_RS06385	3.94 E-10	LTA_synthase_family_protein
CRO	Kmers	ACTTTAGAAACGTAAAAAGTC	Kmer	EA702_RS06385	3.94 E-10	LTA_synthase_family_protein
CRO	Kmers	TATTTAAATTTTCTAAATTCA	Kmer	EA686_15990	3.94 E-10	fimbrial_biogenesis_outer_membrane_usher_protein
CRO	Kmers	GACATCTACTGCTGTTGCTAC	Kmer	EA722_RS04715	3.94 E-10	catechol_1,2-dioxygenase
CRO	Kmers	TGGCTTCTTTAGTTAAATAAA	Kmer	EA722_RS17960	3.94 E-10	glucose_1-dehydrogenase
CRO	Kmers	AGCTAACTTTGCAAGAAAGCT	Kmer	EA708_RS07420	3.94 E-10	long-chain-fatty-acid--CoA_ligase
CRO	Kmers	AGTAAAATCTAACACCGTGTC	Kmer	EA686_00345	3.94 E-10	type_I_secretion_C-terminal_target_domain-containing_protein
CRO	Kmers	TGATCACGTTTTACAAGGTAA	Kmer	EA686_06000	3.94 E-10	UDP-N-acetylmuramate:L-alanyl-gamma-D-glutamyl-_meso-diaminopimelate_ligase
CRO	Kmers	CTTCTATTATTTCTTGGCTTA	Kmer	EA686_03630	3.94 E-10	SDR_family_oxidoreductase
CRO	Kmers	AAGGCGACAATAAATTAGAAA	Kmer	EA702_RS06385	3.94 E-10	LTA_synthase_family_protein
CRO	Kmers	TTTAACATCTGCAAGATCAAA	Kmer	EA686_08600	3.94 E-10	ATP-binding_protein
CRO	Kmers	CTTTACGACTAGGTAACAATA	Kmer	EA702_RS06385	3.94 E-10	LTA_synthase_family_protein
CRO	Kmers	AGCTGAAGCTAATTCTAAATG	Kmer	EA722_RS19575	3.94 E-10	PLD-like_domain_protein
CRO	Kmers	AAGGTTGCTTCAAAGGCTTCT	Kmer	EA702_RS06385	3.94 E-10	LTA_synthase_family_protein
CRO	Kmers	ATAACGGTAAGTTGTGCAACG	Kmer	EA686_19205	3.94 E-10	glycosyltransferase_family_39_protein
CRO	Kmers	AACGTGTCAGGTTATTTATAT	Kmer	EA686_04220	3.94 E-10	type_I_secretion_protein
CRO	Kmers	CATCTTCTATTATTTCTTGGC	Kmer	EA686_03630	3.94 E-10	SDR_family_oxidoreductase
CRO	Kmers	CGTAGCTTTACGTGTTGAAGA	Kmer	EA686_05180	3.94 E-10	translational_GTPase_TypA
CRO	Kmers	CAGTAATCGGCTTTACAATCA	Kmer	EA686_27440	3.94 E-10	hypothetical_protein
CRO	Kmers	AGGAATGGCTTCTTTAGTTAA	Kmer	EA722_RS17960	3.94 E-10	glucose_1-dehydrogenase
CRO	Kmers	ATTTTGGAGCAACGAAACTTG	Kmer	EA702_RS06385	3.94 E-10	LTA_synthase_family_protein
CRO	Kmers	ATCAGGTTATGGTGAACCTCA	Kmer	EA722_RS12880	3.94 E-10	PLP-dependent_aminotransferase_family_protein
CRO	Kmers	ATGGCTGAGCTGCATCTGCCG	Kmer	EA686_17650	3.94 E-10	alpha/beta_fold_hydrolase
CRO	Kmers	GTTCGTAACCCGTACCACAAC	Kmer	EA722_RS15275	3.94 E-10	class_I_SAM-dependent_methyltransferase
CRO	Kmers	CCACTACTGATTAGTCCAAAG	Kmer	EA702_RS06385	3.94 E-10	LTA_synthase_family_protein
CRO	Kmers	CTTAATTGTGGGTTGTGGTAC	Kmer	EA722_RS15275	3.94 E-10	class_I_SAM-dependent_methyltransferase
CRO	Kmers	GTTTTTAAATGAGCCGGTACA	Kmer	EA686_08390	3.94 E-10	sensor_domain-containing_diguanylate_cyclase
CRO	Kmers	GATCCAACCTATCTAAAACAA	Kmer	EA686_00215	3.94 E-10	alpha/beta_hydrolase
CRO	Kmers	GTGCGTGGTCGTTATGCTGCA	Kmer	EA722_RS12815	3.94 E-10	LysR_family_transcriptional_regulator
CRO	Kmers	ACGTTCGTTATCAACAATATA	Kmer	EA722_RS09650	3.94 E-10	hypothetical_protein
CRO	Kmers	GGTAAGGCAAAGTGTACGTTA	Kmer	EA702_RS08920	3.94 E-10	LysE_family_translocator
CRO	Kmers	CATACAGCAAATTTTGCAGCA	Kmer	EA702_RS06385	3.94 E-10	LTA_synthase_family_protein
CRO	Kmers	AAAAGCACTAGCAACCAAAGA	Kmer	EA722_RS00040	3.94 E-10	AdeC/AdeK/OprM_family_multidrug_efflux_complex_outer_membrane_factor
CRO	Kmers	AGTTTTATCGTTTTGCTGCCA	Kmer	EA722_RS12895	3.94 E-10	MFS_transporter
CRO	Kmers	AAGATAGGCTTAAATCACATT	Kmer	EA722_RS07900	3.94 E-10	bifunctional_tetrahydrofolate_synthase/dihydrofolate_synthase
CRO	Kmers	AGCGATGCGCACCTGCGTAAC	Kmer	EA722_RS16665	3.94 E-10	divalent_metal_cation_transporter
CRO	Kmers	AAGCATTGTTTGCTGAGTTGG	Kmer	EA722_RS02380	3.94 E-10	succinate_dehydrogenase_assembly_factor_2
CRO	Kmers	ACCTTCAATGAGCTTCATTTG	Kmer	EA702_RS01610	3.94 E-10	type_II_toxin-antitoxin_system_HipA_family_toxin
CRO	Kmers	CATCTATTGACAATGGCTTAA	Kmer	EA686_16340	3.94 E-10	uracil_phosphoribosyltransferase
CRO	Kmers	CGGCCCTAATTCCTGCGCTAA	Kmer	EA702_RS09865	3.94 E-10	SDR_family_oxidoreductase
CRO	Kmers	CCACAAAAATAAGTCTGGCTA	Kmer	EA686_10530	3.94 E-10	chromate_efflux_transporter
CRO	Kmers	ACTTATTTGCTCATACCTTGC	Kmer	EA722_RS01405	3.94 E-10	aminotransferase_class_I/II-fold_pyridoxal_phosphate-dependent_enzyme
CRO	Kmers	ACAGGTACAGGTAAGACTGCT	Kmer	EA702_RS14255	3.94 E-10	ATP-dependent_RNA_helicase_RhlB
CRO	Kmers	AATCTTGTCGCACAGCTTTTG	Kmer	EA722_RS06500	3.94 E-10	tannase/feruloyl_esterase_family_alpha/beta_hydrolase
CRO	Kmers	AACGTAAAAAGTCACAAACCC	Kmer	EA702_RS06385	3.94 E-10	LTA_synthase_family_protein
CRO	Kmers	ACTCTTGCTGTACAGCCTGGA	Kmer	EA702_RS03205	3.94 E-10	transcription_termination/antitermination_protein_NusA
CRO	Kmers	ATTAGTCCAAAGATAATAATA	Kmer	EA702_RS06385	3.94 E-10	LTA_synthase_family_protein
CRO	Kmers	AAAACGAATTACTTGTTTGCC	Kmer	EA686_06960	3.94 E-10	MerR_family_transcriptional_regulator
CRO	Kmers	ACCTTGTTAACGCTACTACAT	Kmer	EA686_02520	3.94 E-10	2,3-butanediol_dehydrogenase
CRO	Kmers	AATATCACAGCCTTTTGCAAT	Kmer	EA686_08465	3.94 E-10	thiamine_pyrophosphate-dependent_dehydrogenase_E1_component_subunit_alpha
CRO	Kmers	AAACATCATCTTTCCCGTATA	Kmer	EA722_RS13320	3.94 E-10	1-aminocyclopropane-1-carboxylate_deaminase/D-cysteine_desulfhydrase
CRO	Kmers	AACGTTGCTGGGCCATTTCAA	Kmer	EA722_RS02735	3.94 E-10	ATP-dependent_protease
CRO	Kmers	ATAGGTTGGATCTTTTAGATA	Kmer	EA686_00215	3.94 E-10	alpha/beta_hydrolase
CRO	Kmers	AGACAGCGATATTTGTCGTGA	Kmer	EA686_22625	3.94 E-10	DUF1989_domain-containing_protein
CRO	Kmers	GGCGTAGCACTTTGTTGTGAA	Kmer	EA722_RS02985	3.94 E-10	general_secretion_pathway_protein
CRO	Kmers	GCAGCCATCAAATTCGAGCAA	Kmer	EA702_RS11665	3.94 E-10	low_molecular_weight_phosphotyrosine_protein_phosphatase
CRO	Kmers	TCTGGCCCAATAATTGTATAA	Kmer	EA686_00535	3.94 E-10	putative_pilus_assembly_protein_FilE
CRO	Kmers	TCCTTATTTAGATTTTCATAA	Kmer	EA702_RS06385	3.94 E-10	LTA_synthase_family_protein
CRO	Kmers	AAAACCAATTTATGCTTTACC	Kmer	EA702_RS06385	3.94 E-10	LTA_synthase_family_protein
CRO	Kmers	CCTAATATTATTATCTTTGGA	Kmer	EA702_RS06385	3.94 E-10	LTA_synthase_family_protein
CRO	Kmers	ACCTTTAACATCTGCAAGGTC	Kmer	EA722_RS02735	3.94 E-10	ATP-dependent_protease
CRO	Kmers	AAAGAGACGTTCGTTATCAAC	Kmer	EA722_RS09650	3.94 E-10	hypothetical_protein
CRO	Kmers	GTCTTGTAGCATCGACAAAAA	Kmer	EA686_18150	3.94 E-10	ferredoxin--NADP_reductase
CRO	Kmers	AGTAGGCTGGGCAAACAAGTA	Kmer	#N/A	3.94 E-10	intergenic
CRO	Kmers	AAGGGGCTTTTCTACCCTAAC	Kmer	EA686_15215	3.94 E-10	DUF4184_family_protein
CRO	Kmers	CCACTGACAAAACCAATCCCA	Kmer	EA722_RS14405	3.94 E-10	acetyl-CoA_carboxylase
CRO	Kmers	ATCATCCAAAAATACAACGAG	Kmer	EA686_00535	3.94 E-10	putative_pilus_assembly_protein_FilE
CRO	Kmers	ACTACCTCTAATAACAAGCGA	Kmer	EA722_RS05520	3.94 E-10	alkene_reductase
CRO	Kmers	ATCTTTTCCAGTTGAGCCTTG	Kmer	EA677_08225	3.94 E-10	hypothetical_protein
CRO	Kmers	ATCAAATTTAACTAAAAACGA	Kmer	EA686_06470	3.94 E-10	ATP-dependent_Clp_protease_ATP-binding_subunit_ClpX
CRO	Kmers	TTAATTCATGGCTTAACGCAA	Kmer	EA686_08005	3.94 E-10	UDP-N-acetylglucosamine_2-epimerase_(non-hydrolyzing)
CRO	Kmers	ACAACTGTCATTGGCTTGAGC	Kmer	EA702_RS06825	3.94 E-10	aldehyde_dehydrogenase
CRO	Kmers	GGCTACTGGTTAACTGGCTTA	Kmer	EA722_RS14620	3.94 E-10	alpha/beta_fold_hydrolase
CRO	Kmers	AATCACCACACTACTGTGCTC	Kmer	EA722_RS06550	3.94 E-10	GntR_family_transcriptional_regulator
CRO	Kmers	GCAGATGCAGCTCAGCCATTA	Kmer	EA686_17650	3.94 E-10	alpha/beta_fold_hydrolase
CRO	Kmers	AGCTGTACCAATACGAAACTC	Kmer	EA686_28060	3.94 E-10	copper_oxidase
CRO	Kmers	ATTTAACTGTACCAACTCATA	Kmer	EA686_00535	3.94 E-10	putative_pilus_assembly_protein_FilE
CRO	Kmers	GCAAATATTTCCATCTCAAAA	Kmer	EA686_04490	3.94 E-10	hypothetical_protein
CRO	Kmers	CTGGCAGCAAAACGGTAAAAC	Kmer	EA686_10210	3.94 E-10	MFS_transporter
CRO	Kmers	AAGCAACAATATTTATTTAGT	Kmer	EA702_RS06385	3.94 E-10	LTA_synthase_family_protein
CRO	Kmers	AAGTGGGCCGCGATGCCTTAC	Kmer	EA722_RS00190	3.94 E-10	phosphogluconate_dehydratase
CRO	Kmers	GATCGCTTTACCTTACCTTTA	Kmer	EA702_RS03160	3.94 E-10	prepilin_peptidase
CRO	Kmers	AAGGTATATCCAGAGTTAGGA	Kmer	EA702_RS06385	3.94 E-10	LTA_synthase_family_protein
CRO	Kmers	CGCAGAATATTGAGGAAATAA	Kmer	EA702_RS03435	3.94 E-10	ferrochelatase
CRO	Kmers	GAACGTCTCTTTGAAGGCCCA	Kmer	EA722_RS09650	3.94 E-10	hypothetical_protein
CRO	Kmers	CATGCTATGTGTTAAAGCATA	Kmer	EA702_RS08490	3.94 E-10	hypothetical_protein
CRO	Kmers	ACATATAACAATTCATTTGGG	Kmer	EA702_RS06385	3.94 E-10	LTA_synthase_family_protein
CRO	Kmers	CGTAGGGCTAGCGGGAAGCAC	Kmer	EA722_RS10480	3.94 E-10	ParA_family_protein
CRO	Kmers	GCTCGTCGCGAATGTGATTTA	Kmer	EA722_RS07900	3.94 E-10	bifunctional_tetrahydrofolate_synthase/dihydrofolate_synthase
CRO	Kmers	AATTCTTTTAAAAATAAAAAA	Kmer	EA686_16535	3.94 E-10	CapA_family_protein
CRO	Kmers	AGATGATGCAAATTACCATCA	Kmer	EA722_RS03470	3.94 E-10	pyridoxal-phosphate_dependent_enzyme
CRO	Kmers	CACCGACCAAAATAATATCTG	Kmer	EA722_RS07050	3.94 E-10	type_IV_pilus_twitching_motility_protein_PilT
CRO	Kmers	AGGCCGAAGATGTACAAACTG	Kmer	EA702_RS16455	3.94 E-10	cysteine_hydrolase
CRO	Kmers	GATATCTTTTGCATCAGAACC	Kmer	EA686_06610	3.94 E-10	taurine_ABC_transporter_substrate-binding_protein
CRO	Kmers	CAAACTGAACTTAACATTTAA	Kmer	EA686_14625	3.94 E-10	OsmC_family_peroxiredoxin
CRO	Kmers	AGAGTTAACAAATCAGGGACA	Kmer	EA686_00535	3.94 E-10	putative_pilus_assembly_protein_FilE
CRO	Kmers	CTGGTCAATTAGAACTGGTGA	Kmer	EA722_RS03185	3.94 E-10	D-lactate_dehydrogenase
CRO	Kmers	ATAATGAATATCTTGAAGATC	Kmer	EA686_00535	3.94 E-10	putative_pilus_assembly_protein_FilE
CRO	Kmers	AAGCTCAAAAATATGGTCGTA	Kmer	EA702_RS08360	3.94 E-10	3-hydroxybutyrate_dehydrogenase
CRO	Kmers	TACATTGGATGATTTTCGACA	Kmer	EA702_RS06385	3.94 E-10	LTA_synthase_family_protein
CRO	Kmers	GGTGGGCGCAAATTACACAAA	Kmer	EA702_RS01610	3.94 E-10	type_II_toxin-antitoxin_system_HipA_family_toxin
CRO	Kmers	AAATATAAAGTGACTGTTGAA	Kmer	EA702_RS08860	3.94 E-10	PLP-dependent_aminotransferase_family_protein
CRO	Kmers	GAAATGCCCTATAAATTTGAC	Kmer	EA722_RS02735	3.94 E-10	ATP-dependent_protease
CRO	Kmers	AGCCCGCTGAGAGCACCACAT	Kmer	EA686_10215	3.94 E-10	malonate_decarboxylase_subunit_alpha
CRO	Kmers	AGTTTCTTCATGCAAAGTATA	Kmer	EA702_RS14835	3.94 E-10	ABC_transporter_substrate-binding_protein
CRO	Kmers	GCCTTACTTGAGGCTGAATCA	Kmer	EA722_RS00190	3.94 E-10	phosphogluconate_dehydratase
CRO	Kmers	ACGAGTGGCCAATAATATAGA	Kmer	EA686_00535	3.94 E-10	putative_pilus_assembly_protein_FilE
CRO	Kmers	CCCCACTTGCAAAACAATTAA	Kmer	EA686_02000	3.94 E-10	DNA_repair_protein_RecN
CRO	Kmers	ACGACTGAACATATTCGTGAT	Kmer	EA702_RS08490	3.94 E-10	hypothetical_protein
CRO	Kmers	ATTATATGGGCGTGGTTCGGC	Kmer	EA722_RS09880	3.94 E-10	TonB-dependent_siderophore_receptor
CRO	Kmers	ATTCAAACCATTAACGCGGTC	Kmer	EA686_20865	3.94 E-10	CDP-diacylglycerol--serine_O-phosphatidyltransferase
CRO	Kmers	CGAGTGGCCAATAATATAGAG	Kmer	EA686_00535	3.94 E-10	putative_pilus_assembly_protein_FilE
CRO	Kmers	ATAATGACCTGTTGCAATAAA	Kmer	EA686_00985	3.94 E-10	tRNA_2-thiouridine(34)_synthase_MnmA
CRO	Kmers	ACCGATGCCCGGCATATTGAC	Kmer	EA722_RS02825	3.94 E-10	response_regulator
CRO	Kmers	ATGATAAGAAAGAAAATAATG	Kmer	EA702_RS06385	3.94 E-10	LTA_synthase_family_protein
CRO	Kmers	TGATTCCATTGACTAAAGAAA	Kmer	EA722_RS14260	3.94 E-10	glutamine--tRNA_ligase/YqeY_domain_fusion_protein
CRO	Kmers	AATTAGGCAGGTAATCACCAA	Kmer	EA722_RS09770	3.94 E-10	branched-chain_amino_acid_transport_system_II_carrier_protein
CRO	Kmers	AACCAATTTATGCTTTACCTT	Kmer	EA702_RS06385	3.94 E-10	LTA_synthase_family_protein
CRO	Kmers	AAAAACTGTTAAAGCCGAAGA	Kmer	EA686_02400	3.94 E-10	cysteine_hydrolase
CRO	Kmers	AGTCTTGGTCTTGAGTTTGTC	Kmer	EA686_00535	3.94 E-10	putative_pilus_assembly_protein_FilE
CRO	Kmers	ACCTTATACCTTTTGTGGTTA	Kmer	EA722_RS11595	3.94 E-10	(2,3-dihydroxybenzoyl)adenylate_synthase
CRO	Kmers	ATGGTGGTAGAACGAAGGCGG	Kmer	EA687_RS10590	3.94 E-10	hypothetical_protein
CRO	Kmers	GATGTCGAATCTTGTCGCACA	Kmer	EA722_RS06500	3.94 E-10	tannase/feruloyl_esterase_family_alpha/beta_hydrolase
CRO	Kmers	TCACCAAAATCAAGTTTCTAA	Kmer	EA702_RS06385	3.94 E-10	LTA_synthase_family_protein
CRO	Kmers	AACTGTACCAACTCATATTCA	Kmer	EA686_00535	3.94 E-10	putative_pilus_assembly_protein_FilE
CRO	Kmers	CTGGTAAATCACCAAGTCGGC	Kmer	EA686_00900	3.94 E-10	multidrug_efflux_RND_transporter_permease_subunit_AdeB
CRO	Kmers	CTTAATTGTGGGCTGTGGTAC	Kmer	EA686_06375	3.94 E-10	class_I_SAM-dependent_methyltransferase
CRO	Kmers	AACCAATCAAACCTAAAATGA	Kmer	EA686_17180	3.94 E-10	DMT_family_transporter
CRO	Kmers	CAAGCAAACATTCCTGTTCAA	Kmer	EA686_07915	3.94 E-10	exonuclease_V_subunit_amma
CRO	Kmers	AAAGCGGGACACCTATTGTTG	Kmer	EA702_RS01845	3.94 E-10	amino_acid_permease
CRO	Kmers	AAAGATCTAACCATCTCATGC	Kmer	EA722_RS09720	3.94 E-10	GGDEF_domain-containing_protein
CRO	Kmers	GTGGCCCAGCCCCCTTGATTA	Kmer	EA702_RS06385	3.94 E-10	LTA_synthase_family_protein
CRO	Kmers	AACGCCAAAAATTTTCTTTGA	Kmer	EA722_RS13485	3.94 E-10	DedA_family_protein
CRO	Kmers	CTTAACCGATGCTGTCGTTCA	Kmer	EA686_20810	3.94 E-10	dihydrolipoyl_dehydrogenase
CRO	Kmers	CGTGACGGTTTAGTAGCAACA	Kmer	EA722_RS04715	3.94 E-10	catechol_1,2-dioxygenase
CRO	Kmers	ACGTAGCTTTACGTGTTGAAG	Kmer	EA686_05180	3.94 E-10	translational_GTPase_TypA
CRO	Kmers	AGTTTAGCCTTGCTATCGTTG	Kmer	#N/A	3.94 E-10	intergenic
CRO	Kmers	CGGAAGCACATCTAATTTTGC	Kmer	EA686_01130	3.94 E-10	ParA_family_protein
CRO	Kmers	AAGGCTAAACTCGAAAAGATA	Kmer	#N/A	3.94 E-10	intergenic
CRO	Kmers	CCGGCACACCATCCATTAACC	Kmer	EA686_25785	3.94 E-10	copper_oxidase
CRO	Kmers	ACTGTCGAAAATCATCCAATG	Kmer	EA702_RS06385	3.94 E-10	LTA_synthase_family_protein
CRO	Kmers	AAAATACAAAAACTGTTTCAG	Kmer	EA686_00535	3.94 E-10	putative_pilus_assembly_protein_FilE
CRO	Kmers	ACATCTACTGCTGTTGCCACT	Kmer	EA686_20745	3.94 E-10	catechol_1,2-dioxygenase
CRO	Kmers	CCGTAGCTGACCTTTAACATC	Kmer	EA722_RS02735	3.94 E-10	ATP-dependent_protease
CRO	Kmers	CGCGTTAATGGTTTGAATAGC	Kmer	EA686_20865	3.94 E-10	CDP-diacylglycerol--serine_O-phosphatidyltransferase
CRO	Kmers	CTGATCGACCAGTTCAATCGC	Kmer	EA686_24940	3.94 E-10	ABC_transporter_permease_subunit
CRO	Kmers	CCACACTACTGTGCTCACGCA	Kmer	EA722_RS06550	3.94 E-10	GntR_family_transcriptional_regulator
CRO	Kmers	CGCGTGATTCCATTGACTAAA	Kmer	EA722_RS14260	3.94 E-10	glutamine--tRNA_ligase/YqeY_domain_fusion_protein
CRO	Kmers	AAAGCTACGTAACGGCGCAAT	Kmer	EA722_RS13850	3.94 E-10	4-hydroxybenzoate_3-monooxygenase
CRO	Kmers	TAAATCGATGCGGTCAAGTAA	Kmer	EA722_RS02735	3.94 E-10	ATP-dependent_protease
CRO	Kmers	AACCTGATTGAAGTGACCGGA	Kmer	EA686_00345	3.94 E-10	type_I_secretion_C-terminal_target_domain-containing_protein
CRO	Kmers	CATCTTTCTCAAACTTGGTAG	Kmer	EA686_01080	3.94 E-10	bile_acid:sodium_symporter
CRO	Kmers	AACGTACACTTTGCCTTACCG	Kmer	EA702_RS08920	3.94 E-10	LysE_family_translocator
CRO	Kmers	AGAAGGATTTAACTGTACCAA	Kmer	EA686_00535	3.94 E-10	putative_pilus_assembly_protein_FilE
CRO	Kmers	AAACATTCCTGTTCAAAAATG	Kmer	EA686_07915	3.94 E-10	exonuclease_V_subunit_amma
CRO	Kmers	AAATAGGTCTCCTGCTAAACG	Kmer	EA722_RS11570	3.94 E-10	acinetobactin_export_ABC_transporter_permease/ATP-binding_subunit_BarB
CRO	Kmers	AGGTGTCCCGCTTTTTGAAAG	Kmer	EA702_RS01845	3.94 E-10	amino_acid_permease
CRO	Kmers	GGAGCGGCTAAACCTTCTGGA	Kmer	EA722_RS08775	3.94 E-10	aminopeptidase_P_family_protein
CRO	Kmers	CAGAAAAAGCATTGTTTGCTG	Kmer	EA722_RS02380	3.94 E-10	succinate_dehydrogenase_assembly_factor_2
CRO	Kmers	AATTTTATTAATAAAAAGAAG	Kmer	EA702_RS06385	3.94 E-10	LTA_synthase_family_protein
CRO	Kmers	ATACCATATATAACTGTAGAA	Kmer	EA716_RS15225	3.94 E-10	hypothetical_protein
CRO	Kmers	ACCTTTAACATCTGCAAGATC	Kmer	EA686_08600	3.94 E-10	ATP-binding_protein
CRO	Kmers	GGACTAATCAGTAGTGGTTTA	Kmer	EA702_RS06385	3.94 E-10	LTA_synthase_family_protein
CRO	Kmers	CTACGTTGTGAATTAATTCGC	Kmer	EA686_05180	3.94 E-10	translational_GTPase_TypA
CRO	Kmers	CATTATCCAATACTTTAGAAA	Kmer	EA702_RS06385	3.94 E-10	LTA_synthase_family_protein
CRO	Kmers	AGAAAGAGGCACAACATCGCT	Kmer	EA686_08200	3.94 E-10	RtcB_family_protein
CRO	Kmers	ATCTCATTAAGCTTTATCGTC	Kmer	EA686_24565	3.94 E-10	hypothetical_protein
CRO	Kmers	GAAGCACCATCAGAAAGAGCA	Kmer	EA722_RS18770	3.94 E-10	acetyl-CoA_C-acyltransferase_FadA
CRO	Kmers	CGTGGGCGTAGCTGACCTTTA	Kmer	EA686_08600	3.94 E-10	ATP-binding_protein
CRO	Kmers	AAACCTAAGCAACATTTAGAA	Kmer	EA722_RS19575	3.94 E-10	PLD-like_domain_protein
CRO	Kmers	CAAGTTGCGTTAAGCCATGAA	Kmer	EA686_08005	3.94 E-10	UDP-N-acetylglucosamine_2-epimerase_(non-hydrolyzing)
CRO	Kmers	AAATGTGGTGCTCTCAGCGGG	Kmer	EA686_10215	3.94 E-10	malonate_decarboxylase_subunit_alpha
CRO	Kmers	CATCGGAACCTGTGAGCTGCG	Kmer	EA722_RS16140	3.94 E-10	taurine_ABC_transporter_substrate-binding_protein
CRO	Kmers	TACTGATTCAGTGCGCCCCAA	Kmer	EA686_00535	3.94 E-10	putative_pilus_assembly_protein_FilE
CRO	Kmers	TACGCTGGTTACATTATCCAA	Kmer	EA702_RS06385	3.94 E-10	LTA_synthase_family_protein
CRO	Kmers	ATGCAGCTCAGCCATTAAGCC	Kmer	EA722_RS14620	3.94 E-10	alpha/beta_fold_hydrolase
CRO	Kmers	AAGCGTAGGGCTAGCGGGAAG	Kmer	EA722_RS10480	3.94 E-10	ParA_family_protein
CRO	Kmers	CTTGCGCCCAATTTTATCGCC	Kmer	EA722_RS13100	3.94 E-10	MFS_transporter
CRO	Kmers	AAAATCAAGTTTCTAATTTAT	Kmer	EA702_RS06385	3.94 E-10	LTA_synthase_family_protein
CRO	Kmers	AGCTACGCCCACGGCGTGCAC	Kmer	EA686_08600	3.94 E-10	ATP-binding_protein
CRO	Kmers	ATTGCACGTGCAAGAACAGGG	Kmer	EA702_RS10310	3.94 E-10	citrate_(Si)-synthase
CRO	Kmers	ATCTGCTTTGCCGGTTGCCAA	Kmer	EA722_RS17585	3.94 E-10	NADPH-dependent_2,4-dienoyl-CoA_reductase
CRO	Kmers	TAAATGGTTGTGGTGGAGGAA	Kmer	EA686_00540	3.94 E-10	protein_FilF
CRO	Kmers	ATCGACAAACTCAAGACCAAG	Kmer	EA686_00535	3.94 E-10	putative_pilus_assembly_protein_FilE
CRO	Kmers	ATTAGGGACATAAGTATGAAA	Kmer	EA702_RS06385	3.94 E-10	LTA_synthase_family_protein
CRO	Kmers	TATTTTTAAAAGAATTAAAAA	Kmer	EA709_RS17475	3.94 E-10	MBL_fold_metallo-hydrolase
CRO	Kmers	CCAACAGCATTTTTAACTTCA	Kmer	EA686_04220	3.94 E-10	type_I_secretion_protein
CRO	Kmers	AAGGCCGAAGATGTACAAACT	Kmer	EA702_RS16455	3.94 E-10	cysteine_hydrolase
CRO	Kmers	ACTTAAAAGGTGAGGAACTCA	Kmer	EA686_00345	3.94 E-10	type_I_secretion_C-terminal_target_domain-containing_protein
CRO	Kmers	CCGTGTCATGTCCATTCCCGC	Kmer	EA686_00345	3.94 E-10	type_I_secretion_C-terminal_target_domain-containing_protein
CRO	Kmers	TTATATGTCTCTAAACTAAAA	Kmer	EA702_RS06385	3.94 E-10	LTA_synthase_family_protein
CRO	Kmers	TATTCCGAAGTCTGCTGATCA	Kmer	EA686_23920	3.94 E-10	TonB-dependent_siderophore_receptor
CRO	Kmers	GAGTTCAAAAATAACTTTTCC	Kmer	EA686_24050	3.94 E-10	hypothetical_protein
CRO	Kmers	AACCAACTCTTCTTGCAAAGC	Kmer	EA722_RS09825	3.94 E-10	signal_recognition_particle-docking_protein_FtsY
CRO	Kmers	CCCTGATATTATTTTGGTCGG	Kmer	EA686_24665	3.94 E-10	twitching_motility_protein_PilT
CRO	Kmers	AAAATAATATCAGGGTCTTCA	Kmer	EA686_24665	3.94 E-10	twitching_motility_protein_PilT
CRO	Kmers	GCTCATACCTTGCCAAAACAA	Kmer	EA722_RS01405	3.94 E-10	aminotransferase_class_I/II-fold_pyridoxal_phosphate-dependent_enzyme
CRO	Kmers	GTTCTCGTTCCTCCACCAATA	Kmer	EA686_00535	3.94 E-10	putative_pilus_assembly_protein_FilE
CRO	Kmers	ATGGGCGTGGTTCGGCAGGTG	Kmer	EA722_RS09880	3.94 E-10	TonB-dependent_siderophore_receptor
CRO	Kmers	ATACGATCCATTGCACGAGCA	Kmer	EA686_01165	3.94 E-10	citrate_(Si)-synthase
CRO	Kmers	ATAATCTTGAATTTTTCGGTA	Kmer	EA702_RS06385	3.94 E-10	LTA_synthase_family_protein
CRO	Kmers	AATCCAACGTGTAATTTTGAT	Kmer	EA702_RS06385	3.94 E-10	LTA_synthase_family_protein
CRO	Kmers	AAATTAAAGTACTATTTGGAC	Kmer	EA686_00620	3.94 E-10	FKBP-type_peptidyl-prolyl_cis-trans_isomerase
CRO	Kmers	GAAATAAGAGAAGCAACTTGA	Kmer	EA686_01440	3.94 E-10	AraC_family_transcriptional_regulator
CRO	Kmers	AATACAGCCTTTATCATCCAA	Kmer	EA686_00535	3.94 E-10	putative_pilus_assembly_protein_FilE
CRO	Kmers	ATTTATTTACTCGAATGGTGA	Kmer	EA702_RS08950	3.94 E-10	amino_acid_ABC_transporter_permease
CRO	Kmers	GTGACTGGTGAAGTTGCTCTA	Kmer	EA686_09925	3.94 E-10	glycosyltransferase
CRO	Kmers	AGCACATTCATCAGGCACGTG	Kmer	EA722_RS06795	3.94 E-10	CYTH_and_CHAD_domain-containing_protein
CRO	Kmers	TCACCACGCTGGCTTGCTTCA	Kmer	EA702_RS06585	3.94 E-10	MFS_transporter
CRO	Kmers	ACCGCCTGTTTATCGCCTTCT	Kmer	EA686_18630	3.94 E-10	Lrp/AsnC_family_transcriptional_regulator
CRO	Kmers	AAAAAGCGTTGTTTGCTGAGT	Kmer	EA686_26415	3.94 E-10	succinate_dehydrogenase_assembly_factor_2
CRO	Kmers	CAAGGAGTTTTAAAAGTACCG	Kmer	EA686_00535	3.94 E-10	putative_pilus_assembly_protein_FilE
CRO	Kmers	CTGAATACGACTTTTTTCCCA	Kmer	EA702_RS06385	3.94 E-10	LTA_synthase_family_protein
CRO	Kmers	AAACAAGTAATTCGTTTTCAT	Kmer	#N/A	3.94 E-10	intergenic
CRO	Kmers	CACTGCGTGAAGACCCAGATA	Kmer	EA702_RS12675	3.94 E-10	type_IV_pilus_twitching_motility_protein_PilT
CRO	Kmers	CTGAGTGGACCAATAAATTCA	Kmer	EA686_05215	3.94 E-10	EamA_family_transporter
CRO	Kmers	AACGCATTTGAAAAACGAGAT	Kmer	EA686_11515	3.94 E-10	enoyl-CoA_hydratase
CRO	Kmers	GACCGGACACATTACCAGTAC	Kmer	EA686_00345	3.94 E-10	type_I_secretion_C-terminal_target_domain-containing_protein
CRO	Kmers	CATTGCACGAGCAAGAACAGG	Kmer	EA686_01165	3.94 E-10	citrate_(Si)-synthase
CRO	Kmers	TGGCAAGGTATGAGCAAATAA	Kmer	EA722_RS01405	3.94 E-10	aminotransferase_class_I/II-fold_pyridoxal_phosphate-dependent_enzyme
CRO	Kmers	GACAAAAACAGCGGGTCATGA	Kmer	EA702_RS14850	3.94 E-10	ABC_transporter_ATP-binding_protein
CRO	Kmers	TTAGGGACATAAGTATGAAAA	Kmer	EA702_RS06385	3.94 E-10	LTA_synthase_family_protein
CRO	Kmers	ACACGTAAAGCCACGTTGTGA	Kmer	EA722_RS08050	3.94 E-10	translational_GTPase_TypA
CRO	Kmers	GTGATTGCGGGTTTGTTTAAA	Kmer	EA686_04875	3.94 E-10	DUF2474_domain-containing_protein
CRO	Kmers	GTCCTACTTGACCTGTCGCGA	Kmer	EA686_01895	3.94 E-10	phosphogluconate_dehydratase
CRO	Kmers	ATGCTTTACCTTATTATTTAA	Kmer	EA722_RS03210	3.94 E-10	LTA_synthase_family_protein
CRO	Kmers	ATGAAGGCGACAATAAATTAG	Kmer	EA702_RS06385	3.94 E-10	LTA_synthase_family_protein
CRO	Kmers	CTGTTGAGATGTCCAAAACTC	Kmer	EA686_24180	3.94 E-10	DNA_mismatch_repair_protein_MutL
CRO	Kmers	ACTGGCAGCAAAACGGTAAAA	Kmer	EA686_10210	3.94 E-10	MFS_transporter
CRO	Kmers	GAAATCAAATAGGTATAAAAC	Kmer	EA686_18145	3.94 E-10	DNA_polymerase_III_subunit_alpha
CRO	Kmers	ACAAAAATAAGTCTGGCTAAC	Kmer	EA686_10530	3.94 E-10	chromate_efflux_transporter
CRO	Kmers	CATTGTTTGCTGAGTTGGTAG	Kmer	EA722_RS02380	3.94 E-10	succinate_dehydrogenase_assembly_factor_2
CRO	Kmers	AGAAAAAGCGTTGTTTGCTGA	Kmer	EA686_26415	3.94 E-10	succinate_dehydrogenase_assembly_factor_2
CRO	Kmers	CTTCAGCAAGACGTTTCTCAA	Kmer	EA702_RS15935	3.94 E-10	Lon_protease
CRO	Kmers	AAGTAGGGTAGCTAAATGAAT	Kmer	#N/A	3.94 E-10	intergenic
CRO	Kmers	AATTGCTTGCAGCATTAGGAG	Kmer	EA686_16455	3.94 E-10	prepilin_peptidase
CRO	Kmers	CCCAATAATTGTATAAAAACC	Kmer	EA686_00535	3.94 E-10	putative_pilus_assembly_protein_FilE
CRO	Kmers	AGGCGCTCAAGCAAACATTCC	Kmer	EA686_07915	3.94 E-10	exonuclease_V_subunit_amma
CRO	Kmers	AAATTCAAATTTCGGTATTAC	Kmer	EA686_00535	3.94 E-10	putative_pilus_assembly_protein_FilE
CRO	Kmers	GTTTCGTATTGGTACAGCCGA	Kmer	EA702_RS15410	3.94 E-10	copper_resistance_system_multicopper_oxidase
CRO	Kmers	AGGAATGTTTGCTTGAGCGCC	Kmer	EA686_07915	3.94 E-10	exonuclease_V_subunit_amma
CRO	Kmers	CCCTTTGTGTATTTATCTTTA	Kmer	EA686_11790	3.94 E-10	LysE_family_translocator
CRO	Kmers	AGGGTAAAGCGATCAGGCAAT	Kmer	EA686_16455	3.94 E-10	prepilin_peptidase
CRO	Kmers	AGCCTTTATCATCCAAAAATA	Kmer	EA686_00535	3.94 E-10	putative_pilus_assembly_protein_FilE
CRO	Kmers	CACCGTGTCATGTCCATTCCC	Kmer	EA686_00345	3.94 E-10	type_I_secretion_C-terminal_target_domain-containing_protein
CRO	Kmers	CTGCGATTAAAGCAAAACAAG	Kmer	EA702_RS08455	3.94 E-10	fumarate_reductase/succinate_dehydrogenase_flavoprotein_subunit
CRO	Kmers	AGGCGGTACTTTTAAAACTCC	Kmer	EA686_00535	3.94 E-10	putative_pilus_assembly_protein_FilE
CRO	Kmers	AGATTTTGGCAACCGGCAAAG	Kmer	EA722_RS17585	3.94 E-10	NADPH-dependent_2,4-dienoyl-CoA_reductase
CRO	Kmers	GCAATTATAAATTAGATAAGA	Kmer	EA702_RS06385	3.94 E-10	LTA_synthase_family_protein
CRO	Kmers	TCTTAAATTGAGCGCTAAAAA	Kmer	EA733_RS17255	3.94 E-10	TetR/AcrR_family_transcriptional_regulator
CRO	Kmers	GCAAACAACGCTTTTTCTGCC	Kmer	EA686_26415	3.94 E-10	succinate_dehydrogenase_assembly_factor_2
CRO	Kmers	ACAGTAATCGCATAAATAAAC	Kmer	EA702_RS06385	3.94 E-10	LTA_synthase_family_protein
CRO	Kmers	CCAGCAACGATAGCAAGGCTA	Kmer	#N/A	3.94 E-10	intergenic
CRO	Kmers	GCGAGTGATTACCGAGTTTAC	Kmer	EA722_RS07740	3.94 E-10	nicotinate_phosphoribosyltransferase
CRO	Kmers	ATACTGCATCTATTGACAATG	Kmer	EA686_16340	3.94 E-10	uracil_phosphoribosyltransferase
CRO	Kmers	AGGCTTTGCAACTATTAACGA	Kmer	EA722_RS12555	3.94 E-10	K(+)-transporting_ATPase_subunit_B
CRO	Kmers	ATAGGTCTCCTGCTAAACGCA	Kmer	EA722_RS11570	3.94 E-10	acinetobactin_export_ABC_transporter_permease/ATP-binding_subunit_BarB
CRO	Kmers	AAGAGCACCAAGCGTAGGGCT	Kmer	EA722_RS10480	3.94 E-10	ParA_family_protein
CRO	Kmers	AAATTAATTACACATTTTATT	Kmer	#N/A	3.94 E-10	intergenic
CRO	Kmers	ACGAATATGTTCAGTCGTAAC	Kmer	EA702_RS08490	3.94 E-10	hypothetical_protein
CRO	Kmers	ATGACGTTGCTGAAATTGAGA	Kmer	EA702_RS15935	3.94 E-10	Lon_protease
CRO	Kmers	AATGTTGCTTAGGTTTACCCA	Kmer	EA722_RS19575	3.94 E-10	PLD-like_domain_protein
CRO	Kmers	AAAAGATAAGTTGTAAGTGCC	Kmer	EA702_RS06385	3.94 E-10	LTA_synthase_family_protein
CRO	Kmers	ATCAACAAATTGATAGTAATC	Kmer	EA702_RS06385	3.94 E-10	LTA_synthase_family_protein
CRO	Kmers	CATCAGGCACGTGTAAGCTTA	Kmer	EA722_RS06795	3.94 E-10	CYTH_and_CHAD_domain-containing_protein
CRO	Kmers	AACCACGTGCCGTAATCCGCT	Kmer	EA722_RS18770	3.94 E-10	acetyl-CoA_C-acyltransferase_FadA
CRO	Kmers	CGCACCAGCCGCGATAACGAA	Kmer	EA686_15135	3.94 E-10	hypothetical_protein
CRO	Kmers	GGAACACGTATCCAGGCTGTA	Kmer	EA702_RS03205	3.94 E-10	transcription_termination/antitermination_protein_NusA
CRO	Kmers	GGGGAATTTTCTTGGCTTACC	Kmer	EA722_RS16115	3.94 E-10	NCS1_family_nucleobase:cation_symporter-1
CRO	Kmers	AGTGACCTGTTGCAATAAAAT	Kmer	EA722_RS10860	3.94 E-10	tRNA_2-thiouridine(34)_synthase_MnmA
CRO	Kmers	AGACTCTACTGTTGTTTTAGC	Kmer	EA686_00535	3.94 E-10	putative_pilus_assembly_protein_FilE
CRO	Kmers	AATGGTGTTGGAAAAACGACA	Kmer	EA722_RS09825	3.94 E-10	signal_recognition_particle-docking_protein_FtsY
CRO	Kmers	TATCAATAGATGCAGTATAAA	Kmer	EA702_RS03660	3.94 E-10	uracil_phosphoribosyltransferase
CRO	Kmers	TGAAGGTGTAAACGGATATAA	Kmer	EA686_03980	3.94 E-10	heme-binding_protein
CRO	Kmers	CGATTGAAAAGCTGATCTAAA	Kmer	EA686_00535	3.94 E-10	putative_pilus_assembly_protein_FilE
CRO	Kmers	ACTTGCCTGTCATCATTATGA	Kmer	EA722_RS15220	3.94 E-10	nitrogen_regulation_protein_NR(I)
CRO	Kmers	ACAGGTCAAGTAGGACGCGAT	Kmer	EA686_01895	3.94 E-10	phosphogluconate_dehydratase
CRO	Kmers	AATAAAGATAAATAACAGTTG	Kmer	EA717_RS13195	3.94 E-10	hypothetical_protein
CRO	Kmers	GATAAACCTGAATTTTGGACA	Kmer	EA722_RS17025	3.94 E-10	DNA_mismatch_repair_endonuclease_MutL
CRO	Kmers	TGATGCAAATTACCATCAACA	Kmer	EA722_RS03470	3.94 E-10	pyridoxal-phosphate_dependent_enzyme
CRO	Kmers	CGATCTATACGGGAAAGATGA	Kmer	EA722_RS13320	3.94 E-10	1-aminocyclopropane-1-carboxylate_deaminase/D-cysteine_desulfhydrase
CRO	Kmers	ACTGGTTAACTGGCTTAATGG	Kmer	EA722_RS14620	3.94 E-10	alpha/beta_fold_hydrolase
CRO	Kmers	CTACTGCTGTTGCCACTAAAC	Kmer	EA686_20745	3.94 E-10	catechol_1,2-dioxygenase
CRO	Kmers	AAAACAGCGGGTCATGATTGC	Kmer	EA702_RS14850	3.94 E-10	ABC_transporter_ATP-binding_protein
CRO	Kmers	CATCTACTGCTGTTGCCACTA	Kmer	EA686_20745	3.94 E-10	catechol_1,2-dioxygenase
CRO	Kmers	ATGAGCTGCACCTTTCAACTG	Kmer	EA686_10060	3.94 E-10	methyltransferase
CRO	Kmers	CTGATTGAAGTGACCGGACAC	Kmer	EA686_00345	3.94 E-10	type_I_secretion_C-terminal_target_domain-containing_protein
CRO	Kmers	TCTTCAGTAATCGGCTTTACA	Kmer	EA686_27440	3.94 E-10	hypothetical_protein
CRO	Kmers	GGTTTTTTTAGTTTAGAGACA	Kmer	EA702_RS06385	3.94 E-10	LTA_synthase_family_protein
CRO	Kmers	ATGCCGACTCACTCACAGGCC	Kmer	EA702_RS16210	3.94 E-10	excinuclease_ABC_subunit_UvrA
CRO	Kmers	AAGGCATCGCGGCCCACTTGA	Kmer	EA722_RS00190	3.94 E-10	phosphogluconate_dehydratase
CRO	Kmers	AAGTAAACCCTGTTCTTGCTC	Kmer	EA686_01165	3.94 E-10	citrate_(Si)-synthase
CRO	Kmers	AGATAAAAAGGCAATAAAGAT	Kmer	EA730_RS11020	3.94 E-10	MFS_transporter
CRO	Kmers	GCCGTGTAGAAATTGGTTCGA	Kmer	EA686_10855	3.94 E-10	N-acetyltransferase
CRO	Kmers	ACCTACCAAGTTTGAGAAAGA	Kmer	EA686_01080	3.94 E-10	bile_acid:sodium_symporter
CRO	Kmers	ACCACAACCATTTAACATCAA	Kmer	EA686_00540	3.94 E-10	protein_FilF
CRO	Kmers	AAATAAAAAACGCCAAAAATT	Kmer	EA722_RS13485	3.94 E-10	DedA_family_protein
CRO	Kmers	ACCAAAGAAGCCATTCCTTAT	Kmer	EA686_04350	3.94 E-10	glucose_1-dehydrogenase
CRO	Kmers	AGCGCAGGAATTAGGGCCGAA	Kmer	EA702_RS09865	3.94 E-10	SDR_family_oxidoreductase
CRO	Kmers	ACGACTAGGTAACAATACGCT	Kmer	EA702_RS06385	3.94 E-10	LTA_synthase_family_protein
CRO	Kmers	CCAAGAAAAATTAAATACTGC	Kmer	EA686_00535	3.94 E-10	putative_pilus_assembly_protein_FilE
CRO	Kmers	AAGCACGTCTCCGTTTATAAA	Kmer	#N/A	3.94 E-10	intergenic
CRO	Kmers	AGCAACTTCACCAGTCACATG	Kmer	EA686_09925	3.94 E-10	glycosyltransferase
CRO	Kmers	CATAAATAAAAAACGCCAAAA	Kmer	EA722_RS13485	3.94 E-10	DedA_family_protein
CRO	Kmers	CCAAGCGTAGGGCTAGCGGGA	Kmer	EA722_RS10480	3.94 E-10	ParA_family_protein
CRO	Kmers	GGTTCACCAGTTCTAATTGAC	Kmer	EA722_RS03185	3.94 E-10	D-lactate_dehydrogenase
CRO	Kmers	AAAATGCTGTTGGTGAGATTG	Kmer	EA686_04220	3.94 E-10	type_I_secretion_protein
CRO	Kmers	GACTATCTTTTCCAGTTGAGC	Kmer	EA687_RS08400	3.94 E-10	ComF_family_protein
CRO	Kmers	ACACTGCCAAGCTGTCAAACG	Kmer	EA702_RS17855	3.94 E-10	5-oxoprolinase/urea_amidolyase_family_protein
CRO	Kmers	CGTTAAAAATAAGTAGGGTAG	Kmer	EA677_12175	3.94 E-10	DUF2523_domain-containing_protein
CRO	Kmers	GTTACATTATCCAATACTTTA	Kmer	EA702_RS06385	3.94 E-10	LTA_synthase_family_protein
CRO	Kmers	ATAAGAAGCCTTTGAAGCAAC	Kmer	EA702_RS06385	3.94 E-10	LTA_synthase_family_protein
CRO	Kmers	ATGGCTCAGCAACGTTTAAAT	Kmer	EA686_16620	3.94 E-10	ATP-binding_protein
CRO	Kmers	TGTCCGATTCGTGTTTGATAA	Kmer	EA702_RS01610	3.94 E-10	type_II_toxin-antitoxin_system_HipA_family_toxin
CRO	Kmers	GAATCATCAGTTCTAAACTTA	Kmer	EA686_05935	3.94 E-10	sulfonate_ABC_transporter_substrate-binding_protein
CRO	Kmers	ACAATTATTGGGCCAGATGGG	Kmer	EA686_00535	3.94 E-10	putative_pilus_assembly_protein_FilE
CRO	Kmers	CTCACCCCGACTTGCCTGTCA	Kmer	EA722_RS15220	3.94 E-10	nitrogen_regulation_protein_NR(I)
CRO	Kmers	AAGGTATGAAAGTCTTAACCG	Kmer	EA686_20810	3.94 E-10	dihydrolipoyl_dehydrogenase
CRO	Kmers	ACCGAGCGTAGGGCTAGCCGG	Kmer	EA686_01130	3.94 E-10	ParA_family_protein
CRO	Kmers	CTCACCAACAGCATTTTTAAC	Kmer	EA686_04220	3.94 E-10	type_I_secretion_protein
CRO	Kmers	ATCCGCCTGAGCATAAACCTC	Kmer	EA722_RS00570	3.94 E-10	catalase/peroxidase_HPI
CRO	Kmers	TAAATGGTGTTGGAAAAACGA	Kmer	EA722_RS09825	3.94 E-10	signal_recognition_particle-docking_protein_FtsY
CRO	Kmers	ACAACCATTTAACATCAATGC	Kmer	EA686_00540	3.94 E-10	protein_FilF
CRO	Kmers	AAAGCAAATCTTATCCTTCGA	Kmer	EA686_00535	3.94 E-10	putative_pilus_assembly_protein_FilE
CRO	Kmers	GGTATGAAAATAGATTTTTTA	Kmer	EA686_27590	3.94 E-10	CapA_family_protein
CRO	Kmers	GCTTTGGCATTATCAATCATA	Kmer	EA686_00530	3.94 E-10	long-chain_fatty_acid_ABC_transporter
CRO	Kmers	GTTGTCGTTTTTCCAACACCA	Kmer	EA722_RS09825	3.94 E-10	signal_recognition_particle-docking_protein_FtsY
CRO	Kmers	ATTGATAAATATTTTAACTAA	Kmer	EA682_RS14775	3.94 E-10	hypothetical_protein
CRO	Kmers	AAGTTTGTTCAGTTAGATAAT	Kmer	EA735_RS06775	3.94 E-10	hypothetical_protein
CRO	Kmers	TACGACGATGTCATTATTAAA	Kmer	EA722_RS10420	3.94 E-10	nitroreductase_family_protein
CRO	Kmers	GATATCAATTTCTGCTGCCAA	Kmer	EA722_RS08600	3.94 E-10	exonuclease_V_subunit_beta
CRO	Kmers	AGTTGTTGACGTAGAAAAACC	Kmer	EA686_05305	3.94 E-10	HlyC/CorC_family_transporter
CRO	Kmers	AAAAATCAATTAAAACGCTTA	Kmer	EA686_00535	3.94 E-10	putative_pilus_assembly_protein_FilE
CRO	Kmers	ACTTTTAAATGCTGAACAGAA	Kmer	EA686_00535	3.94 E-10	putative_pilus_assembly_protein_FilE
CRO	Kmers	AAAAATAAGTTTAGCTAACCG	Kmer	EA702_RS08465	3.94 E-10	chromate_efflux_transporter
CRO	Kmers	AAGCTAATTCTAAATGTTGCT	Kmer	EA722_RS19575	3.94 E-10	PLD-like_domain_protein
CRO	Kmers	ATCAAAGAAGGCATCTTTAGA	Kmer	EA722_RS07005	3.94 E-10	GNAT_family_N-acetyltransferase
CRO	Kmers	TAATAAAAAGAAGCAACAATA	Kmer	EA702_RS06385	3.94 E-10	LTA_synthase_family_protein
CRO	Kmers	GTGCTGAAGGCGGTACTTTTA	Kmer	EA686_00535	3.94 E-10	putative_pilus_assembly_protein_FilE
CRO	Kmers	CTTATCCTTCGACTATGTTAC	Kmer	EA686_00535	3.94 E-10	putative_pilus_assembly_protein_FilE
CRO	Kmers	TGACCGCGTTAATGGTTTGAA	Kmer	EA686_20865	3.94 E-10	CDP-diacylglycerol--serine_O-phosphatidyltransferase
CRO	Kmers	AGACTCTGGGGTGCGCTTAAA	Kmer	EA686_15430	3.94 E-10	alkaline_phosphatase
CRO	Kmers	TTAAGGCCGAAGATGTACAAA	Kmer	EA702_RS16455	3.94 E-10	cysteine_hydrolase
CRO	Kmers	CAAGAAAGCTCTCTTTTAATA	Kmer	EA686_06845	3.94 E-10	2,5-didehydrogluconate_reductase_DkgB
CRO	Kmers	AATTGGTGGGCCGGGCCGTAA	Kmer	EA686_04935	3.94 E-10	VWA_domain-containing_protein
CRO	Kmers	ACCAAGCGTAGGGCTAGCGGG	Kmer	EA722_RS10480	3.94 E-10	ParA_family_protein
CRO	Kmers	TGACGTTGCTGAAATTGAGAA	Kmer	EA702_RS15935	3.94 E-10	Lon_protease
CRO	Kmers	AATGCTCGGTTGTCAGAAAAA	Kmer	EA686_27425	3.94 E-10	3-deoxy-D-manno-octulosonic_acid_transferase
CRO	Kmers	TGGCCCCATCCATGCTCCTAA	Kmer	EA686_16455	3.94 E-10	prepilin_peptidase
CRO	Kmers	GGATTACCTAAAGATTTATTA	Kmer	EA702_RS06385	3.94 E-10	LTA_synthase_family_protein
CRO	Kmers	TAGGGTAAAGCGATCAGGCAA	Kmer	EA686_16455	3.94 E-10	prepilin_peptidase
CRO	Kmers	ACGGCAACGAGCTTACAAGAG	Kmer	EA722_RS10070	3.94 E-10	flavodoxin
CRO	Kmers	AATAAAATTTAAGTAAATTAA	Kmer	EA702_RS06385	3.94 E-10	LTA_synthase_family_protein
CRO	Kmers	ATAATATCAGGGTCTTCACGC	Kmer	EA686_24665	3.94 E-10	twitching_motility_protein_PilT
CRO	Kmers	TACTTTACGACTAGGTAACAA	Kmer	EA702_RS06385	3.94 E-10	LTA_synthase_family_protein
CRO	Kmers	ATTGGACCAATGATAAATTTG	Kmer	EA686_08925	3.94 E-10	cation_transporter
CRO	Kmers	TATCTGTTACGCAGGTGCGCA	Kmer	EA722_RS16665	3.94 E-10	divalent_metal_cation_transporter
CRO	Kmers	CAGCCTGGATACGTGTTCCAC	Kmer	EA702_RS03205	3.94 E-10	transcription_termination/antitermination_protein_NusA
CRO	Kmers	AAATGGATGAAAGCTGCGGTT	Kmer	EA686_19565	3.94 E-10	NAD(FAD)-dependent_dehydrogenase
CRO	Kmers	ATTTCCTCAATATTCTGCGAC	Kmer	EA702_RS03435	3.94 E-10	ferrochelatase
CRO	Kmers	ATAAAACTTATGCCAAGTTAG	Kmer	EA686_11295	3.94 E-10	bifunctional_proline_dehydrogenase/L-glutamate_amma-semialdehyde_dehydrogenase_PutA
CRO	Kmers	GGCGTAATAAACATACCTACC	Kmer	EA686_01080	3.94 E-10	bile_acid:sodium_symporter
CRO	Kmers	GGCTAACCGTGACCAATGGAA	Kmer	EA686_10530	3.94 E-10	chromate_efflux_transporter
CRO	Kmers	ACAACTTTATGCGTTGCGATA	Kmer	EA686_00535	3.94 E-10	putative_pilus_assembly_protein_FilE
CRO	Kmers	AAGCAAATCTTATCCTTCGAC	Kmer	EA686_00535	3.94 E-10	putative_pilus_assembly_protein_FilE
CRO	Kmers	ATGATCTTATTTTTGATTCGA	Kmer	EA702_RS06385	3.94 E-10	LTA_synthase_family_protein
CRO	Kmers	AAATTGCTTGCAGCATTAGGA	Kmer	EA686_16455	3.94 E-10	prepilin_peptidase
CRO	Kmers	CTCTTTACGGTCGGGTAAGGC	Kmer	EA722_RS08370	3.94 E-10	excinuclease_ABC_subunit_UvrC
CRO	Kmers	ACCACCTGCCGAACCACGCCC	Kmer	EA722_RS09880	3.94 E-10	TonB-dependent_siderophore_receptor
CRO	Kmers	AGAGATTTTGGCAACCGGCAA	Kmer	EA722_RS17585	3.94 E-10	NADPH-dependent_2,4-dienoyl-CoA_reductase
CRO	Kmers	CGAATACCAGAAATGACTGGA	Kmer	EA702_RS06385	3.94 E-10	LTA_synthase_family_protein
CRO	Kmers	AGCAGCCAAAGTTTATTTATG	Kmer	EA702_RS06385	3.94 E-10	LTA_synthase_family_protein
CRO	Kmers	ACAAATTAAGCGCTTTTTTTA	Kmer	EA702_RS03055	3.94 E-10	hypothetical_protein
CRO	Kmers	CCCCATGCAGGTTGATACGTC	Kmer	EA686_22920	3.94 E-10	PaaI_family_thioesterase
CRO	Kmers	ATGCCTTGTTTTGGCAAGGTA	Kmer	EA722_RS01405	3.94 E-10	aminotransferase_class_I/II-fold_pyridoxal_phosphate-dependent_enzyme
CRO	Kmers	ATCTACAACACCGGCCCTGTA	Kmer	EA686_14645	3.94 E-10	amino_acid_permease
CRO	Kmers	CCGCGATGCCTTACTTGAGGC	Kmer	EA722_RS00190	3.94 E-10	phosphogluconate_dehydratase
CRO	Kmers	TTACCCAATTGCTCGGCATAA	Kmer	EA722_RS17835	3.94 E-10	DUF885_domain-containing_protein
CRO	Kmers	TGGAGGAAGTTCGACAATTAA	Kmer	EA686_00540	3.94 E-10	protein_FilF
CRO	Kmers	AAAGTTAGTTCTCGTTCCTCC	Kmer	EA686_00535	3.94 E-10	putative_pilus_assembly_protein_FilE
CRO	Kmers	ACCACAATTGCATTGATGTTA	Kmer	EA686_00540	3.94 E-10	protein_FilF
CRO	Kmers	ATTAGGCAGGTAATCACCAAA	Kmer	EA722_RS09770	3.94 E-10	branched-chain_amino_acid_transport_system_II_carrier_protein
CRO	Kmers	CAATGACATCGTAGGTTTCAG	Kmer	EA686_28060	3.94 E-10	copper_oxidase
CRO	Kmers	CTGAAAGATATTGGCCTGTGA	Kmer	EA702_RS16210	3.94 E-10	excinuclease_ABC_subunit_UvrA
CRO	Kmers	GTTGCATGGGATATGAATCTA	Kmer	EA664_RS12120	3.94 E-10	DUF4102_domain-containing_protein
CRO	Kmers	CATGCATCACCGTTGCATCAA	Kmer	EA686_06090	3.94 E-10	SmvA_family_efflux_MFS_transporter
CRO	Kmers	AGGAATGGCTTCTTTGGTTAA	Kmer	EA686_04350	3.94 E-10	glucose_1-dehydrogenase
CRO	Kmers	ACAAGATTTTAAAGTGGTTGC	Kmer	EA702_RS01320	3.94 E-10	IclR_family_transcriptional_regulator_PcaU
CRO	Kmers	AGATTCGTTTGCCGTACTTAC	Kmer	EA722_RS01750	3.94 E-10	alpha/beta_hydrolase
CRO	Kmers	ACCTTATTATTTAAAATCAAT	Kmer	EA722_RS03210	3.94 E-10	LTA_synthase_family_protein
CRO	Kmers	ATACCGAAATTTGAATTTGTC	Kmer	EA686_00535	3.94 E-10	putative_pilus_assembly_protein_FilE
CRO	Kmers	GATTTAGGTCTTTTTTATTTA	Kmer	EA722_RS19110	3.94 E-10	hypothetical_protein
CRO	Kmers	ATTGCGTAAGTAATTGCTGCC	Kmer	EA722_RS01405	3.94 E-10	aminotransferase_class_I/II-fold_pyridoxal_phosphate-dependent_enzyme
CRO	Kmers	TTTATTGAGTTAGCCAAGAAA	Kmer	EA686_08200	3.94 E-10	RtcB_family_protein
CRO	Kmers	AAAAATTAAGCACGTCTCCGT	Kmer	#N/A	3.94 E-10	intergenic
CRO	Kmers	TCGTACTGCTGGATGTCAACA	Kmer	EA686_08215	3.94 E-10	response_regulator
CRO	Kmers	GCATAGTTAAAAAGAATTGAA	Kmer	EA687_RS15605	3.94 E-10	molybdate_ABC_transporter_substrate-binding_protein
CRO	Kmers	AATGGCCCCATCCATGCACCT	Kmer	EA702_RS03160	3.94 E-10	prepilin_peptidase
CRO	Kmers	GGCACTGATTTTAATTAGCCA	Kmer	EA722_RS14110	3.94 E-10	ABC_transporter_ATP-binding_protein
CRO	Kmers	ACTGGATCGGTGATTACCGAA	Kmer	EA702_RS06385	3.94 E-10	LTA_synthase_family_protein
CRO	Kmers	TGCCGAAATGAATGTTCAGCA	Kmer	EA722_RS08370	3.94 E-10	excinuclease_ABC_subunit_UvrC
CRO	Kmers	AAGCAAAAATAATGTAGCACT	Kmer	EA730_RS06575	3.94 E-10	MFS_transporter
CRO	Kmers	AAAGTATTGCGCCGTTACGTA	Kmer	EA722_RS13850	3.94 E-10	4-hydroxybenzoate_3-monooxygenase
CRO	Kmers	ACCAAAATAATATCTGGGTCT	Kmer	EA722_RS07050	3.94 E-10	type_IV_pilus_twitching_motility_protein_PilT
CRO	Kmers	AAACGACAACAATTGGTAAAT	Kmer	EA722_RS09825	3.94 E-10	signal_recognition_particle-docking_protein_FtsY
CRO	Kmers	AGCCAGATAAAATTAAAACCG	Kmer	EA722_RS04430	3.94 E-10	alpha/beta_hydrolase
CRO	Kmers	CCAATCCCAGCAATTACACCA	Kmer	EA722_RS14405	3.94 E-10	acetyl-CoA_carboxylase
CRO	Kmers	CTTTGGTTGCTAGTGCTTTTC	Kmer	EA722_RS00040	3.94 E-10	AdeC/AdeK/OprM_family_multidrug_efflux_complex_outer_membrane_factor
CRO	Kmers	ACTGTTATTTATCTTTATTGC	Kmer	EA717_RS13195	3.94 E-10	hypothetical_protein
CRO	Kmers	ATTAAATGTTGAAAATGGTGG	Kmer	EA722_RS06445	3.94 E-10	arginine_N-succinyltransferase
CRO	Kmers	GAAAGCTCTCTTTTAATAATA	Kmer	EA686_06845	3.94 E-10	2,5-didehydrogluconate_reductase_DkgB
CRO	Kmers	AAAATTACACGTTGGATTTTC	Kmer	EA702_RS06385	3.94 E-10	LTA_synthase_family_protein
CRO	Kmers	AAGAAAGGCTGTTTGTTTTAC	Kmer	EA686_04220	3.94 E-10	type_I_secretion_protein
CRO	Kmers	GCTCTTGTGAAGACAAACGCA	Kmer	EA686_00535	3.94 E-10	putative_pilus_assembly_protein_FilE
CRO	Kmers	CTGATGCAGCTCAGCCATTAA	Kmer	EA722_RS14620	3.94 E-10	alpha/beta_fold_hydrolase
CRO	Kmers	TTTCATTCAGGCTATACAAAA	Kmer	EA702_RS07875	3.94 E-10	acinetobactin_non-ribosomal_peptide_synthetase_subunit_BasB
CRO	Kmers	CTTGATTTTGGTGAACAAAAG	Kmer	EA702_RS06385	3.94 E-10	LTA_synthase_family_protein
CRO	Kmers	CTGAATTTTGGACATCTCAAC	Kmer	EA722_RS17025	3.94 E-10	DNA_mismatch_repair_endonuclease_MutL
CRO	Kmers	ATATCGACTACTTGGCGTTGC	Kmer	EA702_RS08655	3.94 E-10	chromate_transporter
CRO	Kmers	GATTATAAAAAATCAATTAAA	Kmer	EA686_00535	3.94 E-10	putative_pilus_assembly_protein_FilE
CRO	Kmers	AAACAGTTTTTGTATTTTTCT	Kmer	EA686_00535	3.94 E-10	putative_pilus_assembly_protein_FilE
CRO	Kmers	ACGTTTTACAAGGTAAACATG	Kmer	EA686_06000	3.94 E-10	UDP-N-acetylmuramate:L-alanyl-gamma-D-glutamyl-_meso-diaminopimelate_ligase
CRO	Kmers	AAGCACCATCAGAAAGAGCAG	Kmer	EA722_RS18770	3.94 E-10	acetyl-CoA_C-acyltransferase_FadA
CRO	Kmers	AACATTGCAGAAGCACCATCA	Kmer	EA722_RS18770	3.94 E-10	acetyl-CoA_C-acyltransferase_FadA
CRO	Kmers	ACGTCTCTTTGAAGGCCCATA	Kmer	EA722_RS09650	3.94 E-10	hypothetical_protein
CRO	Kmers	GCAAACATTCCTGTTCAAAAA	Kmer	EA686_07915	3.94 E-10	exonuclease_V_subunit_amma
CRO	Kmers	CTATTTTTTCAATTCTTTTTA	Kmer	EA702_RS05820	3.94 E-10	site-specific_integrase
CRO	Kmers	AGAGCTTTCTTGCAAAGTTAG	Kmer	EA708_RS07420	3.94 E-10	long-chain-fatty-acid--CoA_ligase
CRO	Kmers	AATTAAGCGCTTTTTTTATAT	Kmer	EA702_RS03055	3.94 E-10	hypothetical_protein
CRO	Kmers	CAGTGATTGTAAAGCCGATTA	Kmer	EA686_27440	3.94 E-10	hypothetical_protein
CRO	Kmers	ATCTTTTCGAGTTTAGCCTTG	Kmer	#N/A	3.94 E-10	intergenic
CRO	Kmers	ACTCACAGGCCAATATCTTTC	Kmer	EA702_RS16210	3.94 E-10	excinuclease_ABC_subunit_UvrA
CRO	Kmers	AGACAGGTACAGGTAAGACTG	Kmer	EA702_RS14255	3.94 E-10	ATP-dependent_RNA_helicase_RhlB
CRO	Kmers	AATAAACTTTGGCTGCTGCTC	Kmer	EA702_RS06385	3.94 E-10	LTA_synthase_family_protein
CRO	Kmers	ATATTTATTTAGTAATTTAAG	Kmer	EA702_RS06385	3.94 E-10	LTA_synthase_family_protein
CRO	Kmers	GGCAACGTCTACAGTTATATA	Kmer	EA716_RS15225	3.94 E-10	hypothetical_protein
CRO	Kmers	GCAGAAGAAGCAAAACGTGCA	Kmer	EA686_00700	3.94 E-10	dihydrodipicolinate_synthase_family_protein
CRO	Kmers	TAAAAATAAGTAGGGTAGCTA	Kmer	EA706_RS15385	3.94 E-10	aspartate_aminotransferase_family_protein
CRO	Kmers	GACAGTAATCGCATAAATAAA	Kmer	EA702_RS06385	3.94 E-10	LTA_synthase_family_protein
CRO	Kmers	TAAACTAAAAAAACCAATTTA	Kmer	EA702_RS06385	3.94 E-10	LTA_synthase_family_protein
CRO	Kmers	CGATTCTTCACTCGATAAATC	Kmer	EA686_00535	3.94 E-10	putative_pilus_assembly_protein_FilE
CRO	Kmers	ATAAATAAACTTTGGCTGCTG	Kmer	EA702_RS06385	3.94 E-10	LTA_synthase_family_protein
CRO	Kmers	AATAAGAGAAGCAACTTGAGA	Kmer	EA686_01440	3.94 E-10	AraC_family_transcriptional_regulator
CRO	Kmers	ATTGTTGTCGTTTTTCCAACA	Kmer	EA722_RS09825	3.94 E-10	signal_recognition_particle-docking_protein_FtsY
CRO	Kmers	ACGATTGATGCAACGGTGATG	Kmer	EA686_06090	3.94 E-10	SmvA_family_efflux_MFS_transporter
CRO	Kmers	AATCTAACACCGTGTCATGTC	Kmer	EA686_00345	3.94 E-10	type_I_secretion_C-terminal_target_domain-containing_protein
CRO	Kmers	AAAGCTTTGCAAGAAGAGTTG	Kmer	EA722_RS09825	3.94 E-10	signal_recognition_particle-docking_protein_FtsY
CRO	Kmers	AGCAACGATAGCAAGGCTAAA	Kmer	#N/A	3.94 E-10	intergenic
CRO	Kmers	AAGCCATTGTCAATAGATGCA	Kmer	EA686_16340	3.94 E-10	uracil_phosphoribosyltransferase
CRO	Kmers	AGTTTTAAGAAAAACACCGGC	Kmer	EA686_07075	3.94 E-10	LysR_family_transcriptional_regulator_ArgP
CRO	Kmers	GATGCCGAAAACCGTACTAGC	Kmer	EA686_24895	3.94 E-10	DUF1852_family_protein
CRO	Kmers	GCATCTATTGACAATGGCTTA	Kmer	EA686_16340	3.94 E-10	uracil_phosphoribosyltransferase
CRO	Kmers	CATCTATTGATAATGGCTTAA	Kmer	EA702_RS03660	3.94 E-10	uracil_phosphoribosyltransferase
CRO	Kmers	AGCAACATTGCAGAAGCACCA	Kmer	EA722_RS18770	3.94 E-10	acetyl-CoA_C-acyltransferase_FadA
CRO	Kmers	TAGCAACCAAAGATGCGACTA	Kmer	EA722_RS00040	3.94 E-10	AdeC/AdeK/OprM_family_multidrug_efflux_complex_outer_membrane_factor
CRO	Kmers	ACAAACTTAAAGAAACAGAAC	Kmer	EA702_RS14985	3.94 E-10	arginine_N-succinyltransferase
CRO	Kmers	AAGTATACAGACTAAAAATAG	Kmer	EA682_RS17430	3.94 E-10	APC_family_permease
CRO	Kmers	ATGAGGAGTATGATAAGAAAG	Kmer	EA702_RS06385	3.94 E-10	LTA_synthase_family_protein
CRO	Kmers	ATTTCATTCAGGCTATACAAA	Kmer	EA702_RS07875	3.94 E-10	acinetobactin_non-ribosomal_peptide_synthetase_subunit_BasB
CRO	Kmers	AATGGTTCACCAGTTCTAATT	Kmer	EA722_RS03185	3.94 E-10	D-lactate_dehydrogenase
CRO	Kmers	GCCAGACTTATTTTTGTGGCA	Kmer	EA686_10530	3.94 E-10	chromate_efflux_transporter
CRO	Kmers	CAATAGTTCCCAAATATTTGG	Kmer	EA686_21325	3.94 E-10	MFS_transporter
CRO	Kmers	GAGAAAGTAAGCCAAGAAATA	Kmer	EA686_03630	3.94 E-10	SDR_family_oxidoreductase
CRO	Kmers	ACAGAAAAAGAGTTAACAAAT	Kmer	EA686_00535	3.94 E-10	putative_pilus_assembly_protein_FilE
CRO	Kmers	TGAAATCAAATAGGTATAAAA	Kmer	EA686_18145	3.94 E-10	DNA_polymerase_III_subunit_alpha
CRO	Kmers	TATAAAAAAGGCCTGTTCGAA	Kmer	#N/A	3.94 E-10	intergenic
CRO	Kmers	ACTCGTGACGGTTTAGTGGCA	Kmer	EA686_20745	3.94 E-10	catechol_1,2-dioxygenase
CRO	Kmers	ATGGCGTATCGGCTTAAGTCG	Kmer	EA722_RS06555	3.94 E-10	oxidoreductase
CRO	Kmers	TCACCAAGTCGGCCGGGTGCA	Kmer	EA686_00900	3.94 E-10	multidrug_efflux_RND_transporter_permease_subunit_AdeB
CRO	Kmers	ATGAGTCTGGCTGCACGTCAG	Kmer	EA686_01005	3.94 E-10	outer_membrane_lipoprotein-sorting_protein
CRO	Kmers	AAAGCAACAATAGGTGTCCCG	Kmer	EA702_RS01845	3.94 E-10	amino_acid_permease
CRO	Kmers	ATCAGTAGAGCAACTTCACCA	Kmer	EA686_09925	3.94 E-10	glycosyltransferase
CRO	Kmers	AGCAAGGCTCAACTGGAAAAG	Kmer	EA729_RS00435	3.94 E-10	methionine_ABC_transporter_ATP-binding_protein
CRO	Kmers	CTAATTAAAATCAGTGCCATA	Kmer	EA722_RS14110	3.94 E-10	ABC_transporter_ATP-binding_protein
CRO	Kmers	AATTAGAAACTTGATTTTGGT	Kmer	EA702_RS06385	3.94 E-10	LTA_synthase_family_protein
CRO	Kmers	TCTAGCTCTTGTGAAGACAAA	Kmer	EA686_00535	3.94 E-10	putative_pilus_assembly_protein_FilE
CRO	Kmers	GAAGCCTTTGAAGCAACCTTA	Kmer	EA702_RS06385	3.94 E-10	LTA_synthase_family_protein
CRO	Kmers	ATGGCGCTGGTAACGTGTCAG	Kmer	EA686_04220	3.94 E-10	type_I_secretion_protein
CRO	Kmers	GTTACGATTGATGCAACGGTA	Kmer	EA722_RS13570	3.94 E-10	MFS_transporter
CRO	Kmers	CATATAACAATTCATTTGGGA	Kmer	EA702_RS06385	3.94 E-10	LTA_synthase_family_protein
CRO	Kmers	AAACCAATCAAACCTAAAATG	Kmer	EA686_17180	3.94 E-10	DMT_family_transporter
CRO	Kmers	AACCAATTGATTTTAAATAAT	Kmer	EA722_RS03210	3.94 E-10	LTA_synthase_family_protein
CRO	Kmers	GCTACTAAACCGTCACGAGTA	Kmer	EA722_RS04715	3.94 E-10	catechol_1,2-dioxygenase
CRO	Kmers	AACCACCTGCCGAACCACGCC	Kmer	EA722_RS09880	3.94 E-10	TonB-dependent_siderophore_receptor
CRO	Kmers	CACCCCGACTTGCCTGTCATC	Kmer	EA722_RS15220	3.94 E-10	nitrogen_regulation_protein_NR(I)
CRO	Kmers	AGTTAGGATTTGAGAAATTTA	Kmer	EA702_RS06385	3.94 E-10	LTA_synthase_family_protein
CRO	Kmers	CTCGTGACGGTTTAGTAGCAA	Kmer	EA722_RS04715	3.94 E-10	catechol_1,2-dioxygenase
CRO	Kmers	AGCAACAATAGGTGTTCCGCT	Kmer	EA686_27290	3.94 E-10	amino_acid_permease
CRO	Kmers	AAAGCTTTATAAAGTGAATGT	Kmer	EA722_RS09825	3.94 E-10	signal_recognition_particle-docking_protein_FtsY
CRO	Kmers	ACAGTTAAATCCTTCTGTTCA	Kmer	EA686_00535	3.94 E-10	putative_pilus_assembly_protein_FilE
CRO	Kmers	CCATTGTCAATAGATGCAGTA	Kmer	EA686_16340	3.94 E-10	uracil_phosphoribosyltransferase
CRO	Kmers	GGTTGTGGTACGGGTTACGAA	Kmer	EA722_RS15275	3.94 E-10	class_I_SAM-dependent_methyltransferase
CRO	Kmers	CTATTAACGAATCGGCTGTTA	Kmer	EA722_RS12555	3.94 E-10	K(+)-transporting_ATPase_subunit_B
CRO	Kmers	AATTTTGACTATCTTTTCCAG	Kmer	EA686_05075	3.94 E-10	methionine--tRNA_ligase
CRO	Kmers	GTTCATTTAAGCCATTATCAA	Kmer	EA702_RS03660	3.94 E-10	uracil_phosphoribosyltransferase
CRO	Kmers	CTATTTGATTTCAGAAAAGGC	Kmer	EA682_RS08030	3.94 E-10	hypothetical_protein
CRO	Kmers	AATTGCTCAAGCCAATGACAG	Kmer	EA702_RS06825	3.94 E-10	aldehyde_dehydrogenase
CRO	Kmers	AATACAACATTAGACGAATTA	Kmer	EA686_00345	3.94 E-10	type_I_secretion_C-terminal_target_domain-containing_protein
CRO	Kmers	TAACCCGTACCACAACCCACA	Kmer	EA722_RS15275	3.94 E-10	class_I_SAM-dependent_methyltransferase
CRO	Kmers	CAGAAAGTGGTGAAATTCATC	Kmer	EA722_RS11195	3.94 E-10	aromatic_ring-hydroxylating_dioxygenase_subunit_alpha
CRO	Kmers	ATAAGTTTTATACCTATTTGA	Kmer	EA729_RS06900	3.94 E-10	ATP-binding_protein
CRO	Kmers	CAAGCGGTACAGCAAGAGTTA	Kmer	EA686_00475	3.94 E-10	transcription_termination/antitermination_protein_NusA
CRO	Kmers	CTTGCCGAAATGAATGTTCAA	Kmer	EA686_07365	3.94 E-10	UvrABC_system_protein_C
CRO	Kmers	CGGCGTAAGCTTACACGTGCC	Kmer	EA722_RS06795	3.94 E-10	CYTH_and_CHAD_domain-containing_protein
CRO	Kmers	ATAATGAAATTATCGGCAGGC	Kmer	EA686_27115	3.94 E-10	FAD-dependent_oxidoreductase
CRO	Kmers	CGTTGTTTGCTGAGTTGGTAG	Kmer	EA686_26415	3.94 E-10	succinate_dehydrogenase_assembly_factor_2
CRO	Kmers	AACTCTTCTTGCAAAGCTTTA	Kmer	EA722_RS09825	3.94 E-10	signal_recognition_particle-docking_protein_FtsY
CRO	Kmers	ATTTAATTTTTCTTGGACATG	Kmer	EA686_00535	3.94 E-10	putative_pilus_assembly_protein_FilE
CRO	Kmers	TTAAAAACGATTCCTTCTGAA	Kmer	EA686_03800	3.94 E-10	protocatechuate_3,4-dioxygenase_subunit_beta
CRO	Kmers	ACGATCCAAACTGAACTTAAC	Kmer	EA686_14625	3.94 E-10	OsmC_family_peroxiredoxin
CRO	Kmers	GGCGTGATTGAAAATATTGAC	Kmer	EA702_RS12690	3.94 E-10	exonuclease_SbcCD_subunit_D
CRO	Kmers	CCAATTACCGAAAAACCATTA	Kmer	EA686_09495	3.94 E-10	50S_ribosomal_protein_L16
CRO	Kmers	ATTTATTTAGTAATTTAAGTC	Kmer	EA702_RS06385	3.94 E-10	LTA_synthase_family_protein
CRO	Kmers	GATTTCCCGCCTTGAACATCA	Kmer	EA686_06405	3.94 E-10	magnesium-translocating_P-type_ATPase
CRO	Kmers	GATCGACCAGTTCAATCGCTA	Kmer	EA686_24940	3.94 E-10	ABC_transporter_permease_subunit
CRO	Kmers	AAAGCCGATTACTGAAGACAA	Kmer	EA686_27440	3.94 E-10	hypothetical_protein
CRO	Kmers	AACCATCAATGCTTATGGTGA	Kmer	EA722_RS00850	3.94 E-10	DNA-binding_protein
CRO	Kmers	GATTTTATTGCAACAGGTCAC	Kmer	EA722_RS10860	3.94 E-10	tRNA_2-thiouridine(34)_synthase_MnmA
CRO	Kmers	CAGAACCTGTGAGCTGCGCAA	Kmer	EA686_06610	3.94 E-10	taurine_ABC_transporter_substrate-binding_protein
CRO	Kmers	AAAAAGCGGAACACCTATTGT	Kmer	EA686_27290	3.94 E-10	amino_acid_permease
CRO	Kmers	CCAAGAAAGAGGCACAACATC	Kmer	EA686_08200	3.94 E-10	RtcB_family_protein
CRO	Kmers	AAGATTATAAAAAATCAATTA	Kmer	EA686_00535	3.94 E-10	putative_pilus_assembly_protein_FilE
CRO	Kmers	AGTCAGTTAACCAGTAGCCAA	Kmer	EA686_17650	3.94 E-10	alpha/beta_fold_hydrolase
CRO	Kmers	GCCACGGAAGCCATTGAAAGA	Kmer	EA686_00535	3.94 E-10	putative_pilus_assembly_protein_FilE
CRO	Kmers	AAACAGCGGGTCATGATTGCA	Kmer	EA702_RS14850	3.94 E-10	ABC_transporter_ATP-binding_protein
CRO	Kmers	ATTTTTATCGCGTATTGGTTC	Kmer	EA702_RS05100	3.94 E-10	long-chain-acyl-CoA_synthetase
CRO	Kmers	ATATGGATTGGTTTAAAAAAG	Kmer	EA686_03620	3.94 E-10	metal-dependent_hydrolase
CRO	Kmers	GGGTTGTGGTACGGGTTACGA	Kmer	EA722_RS15275	3.94 E-10	class_I_SAM-dependent_methyltransferase
CRO	Kmers	AATATTTTTATCATTTTTGGG	Kmer	EA722_RS02565	3.94 E-10	hypothetical_protein
CRO	Kmers	CTTTCTTGGCTAACTCAATAA	Kmer	EA686_08200	3.94 E-10	RtcB_family_protein
CRO	Kmers	GCCTCTTTCTTGGCTAACTCA	Kmer	EA686_08200	3.94 E-10	RtcB_family_protein
CRO	Kmers	AGAAGCAACAATATTTATTTA	Kmer	EA702_RS06385	3.94 E-10	LTA_synthase_family_protein
CRO	Kmers	CTATTTTCATACCCTTTTTAC	Kmer	EA702_RS17660	3.94 E-10	hypothetical_protein
CRO	Kmers	CTTTTTCCGCTCTACTGATTC	Kmer	EA686_00535	3.94 E-10	putative_pilus_assembly_protein_FilE
CRO	Kmers	TTTAACATCTGCAAGGTCAAA	Kmer	EA722_RS02735	3.94 E-10	ATP-dependent_protease
CRO	Kmers	CTGGATGTCAATATGCCGGGC	Kmer	EA722_RS02825	3.94 E-10	response_regulator
CRO	Kmers	GATTTTTTATAATCTTTAATA	Kmer	EA686_00535	3.94 E-10	putative_pilus_assembly_protein_FilE
CRO	Kmers	ATTCGAGTAAATAAATTAATC	Kmer	EA702_RS08950	3.94 E-10	amino_acid_ABC_transporter_permease
CRO	Kmers	CATCCTCCGATTCTTCACTCG	Kmer	EA686_00535	3.94 E-10	putative_pilus_assembly_protein_FilE
CRO	Kmers	GCGTTTTCTAAAACAAGACTA	Kmer	EA702_RS07305	3.94 E-10	hypothetical_protein
CRO	Kmers	CAATTAAGATATGTGCATCTG	Kmer	EA722_RS15275	3.94 E-10	class_I_SAM-dependent_methyltransferase
CRO	Kmers	CATCTAAAGAAAAAGAACAAA	Kmer	EA686_00535	3.94 E-10	putative_pilus_assembly_protein_FilE
CRO	Kmers	ACAAGGGCTTGCTGCTTCTGA	Kmer	EA686_05115	3.94 E-10	acyl-CoA_dehydrogenase
CRO	Kmers	AACGATTCCTTCTGAAGATCA	Kmer	EA686_03800	3.94 E-10	protocatechuate_3,4-dioxygenase_subunit_beta
CRO	Kmers	ACTTCACTGGCAGCAAAACGA	Kmer	EA722_RS12895	3.94 E-10	MFS_transporter
CRO	Kmers	GAAATGGCCCAGCAACGTTTA	Kmer	EA722_RS02735	3.94 E-10	ATP-dependent_protease
CRO	Kmers	ACAGCGCCTTTATCGAGTAAG	Kmer	EA722_RS16665	3.94 E-10	divalent_metal_cation_transporter
CRO	Kmers	CAGCACTGCGTGAAGACCCTG	Kmer	EA686_01375	3.94 E-10	twitching_motility_protein_PilT
CRO	Kmers	CTCTGGTGCATGAATATCAAA	Kmer	EA722_RS05525	3.94 E-10	3-deoxy-D-manno-octulosonic_acid_transferase
CRO	Kmers	ACCTAGTCGTAAAGTATCTGA	Kmer	EA702_RS06385	3.94 E-10	LTA_synthase_family_protein
CRO	Kmers	AAAAGCGTTGTTTGCTGAGTT	Kmer	EA686_26415	3.94 E-10	succinate_dehydrogenase_assembly_factor_2
CRO	Kmers	ATGAATCGGCTGTTACAGGTG	Kmer	EA686_02925	3.94 E-10	K(+)-transporting_ATPase_subunit_B
CRO	Kmers	CATCAAAGAAGGCATCTTTAG	Kmer	EA722_RS07005	3.94 E-10	GNAT_family_N-acetyltransferase
CRO	Kmers	TGACAAAACCAATCCCAGCAA	Kmer	EA722_RS14405	3.94 E-10	acetyl-CoA_carboxylase
CRO	Kmers	GCATGGTTCAAAACTGATTCA	Kmer	EA702_RS16700	3.94 E-10	acyl-CoA_carboxylase_subunit_beta
CRO	Kmers	AAAAGTCACAAACCCATAATC	Kmer	EA702_RS06385	3.94 E-10	LTA_synthase_family_protein
CRO	Kmers	CCTTCAAAGAGACGTTCGTTA	Kmer	EA722_RS09650	3.94 E-10	hypothetical_protein
CRO	Kmers	CACTTTATAAAGCCTTGCAAG	Kmer	EA686_19040	3.94 E-10	signal_recognition_particle-docking_protein_FtsY
CRO	Kmers	TAAGTTGAAAACACAATAATA	Kmer	#N/A	3.94 E-10	intergenic
CRO	Kmers	AACAGCTTGTAGAAGCGATTA	Kmer	EA686_21430	3.94 E-10	fructose-bisphosphate_aldolase_class_II
CRO	Kmers	CGTAGGGCTAGCCGGAAGCAC	Kmer	EA686_01130	3.94 E-10	ParA_family_protein
CRO	Kmers	AACGAATCACTTGTTTGCCCA	Kmer	#N/A	3.94 E-10	intergenic
CRO	Kmers	AAGATATGTGCATCTGGTGGC	Kmer	EA722_RS15275	3.94 E-10	class_I_SAM-dependent_methyltransferase
CRO	Kmers	AAACCCGCAATCACAGCTAAG	Kmer	EA686_04875	3.94 E-10	DUF2474_domain-containing_protein
CRO	Kmers	CAAAAATAAGTTTAGCTAACC	Kmer	EA702_RS08465	3.94 E-10	chromate_efflux_transporter
CRO	Kmers	TAGTTAAAAAGAATTGAAAAA	Kmer	EA686_16385	3.94 E-10	amino_acid_ABC_transporter_substrate-binding_protein
CRO	Kmers	ACCTGAATTTTGGACATCTCA	Kmer	EA722_RS17025	3.94 E-10	DNA_mismatch_repair_endonuclease_MutL
CRO	Kmers	ACAATATATGGATTGGTTTAA	Kmer	EA686_03620	3.94 E-10	metal-dependent_hydrolase
CRO	Kmers	CAGTGCGCCCCAAACCATCAG	Kmer	EA686_00535	3.94 E-10	putative_pilus_assembly_protein_FilE
CRO	Kmers	CAGCGTTTTCTAAAACAAGAC	Kmer	EA702_RS07305	3.94 E-10	hypothetical_protein
CRO	Kmers	GGCCGCCCATCTGGCCCAATA	Kmer	EA686_00535	3.94 E-10	putative_pilus_assembly_protein_FilE
CRO	Kmers	ATAAAATTGGGCGCAAGAAAT	Kmer	EA722_RS13100	3.94 E-10	MFS_transporter
CRO	Kmers	ATTTGGCATGAGATGGTTAGA	Kmer	EA722_RS09720	3.94 E-10	GGDEF_domain-containing_protein
CRO	Kmers	AAAGTAAAGCGACTTTTCATA	Kmer	EA702_RS06385	3.94 E-10	LTA_synthase_family_protein
CRO	Kmers	AATTTAAAAAGCCTCCTAGAT	Kmer	EA726_RS15140	3.94 E-10	polysaccharide_biosynthesis_protein
CRO	Kmers	ACCGTCAGTTGCAACCATACC	Kmer	EA722_RS01485	3.94 E-10	1-(5-phosphoribosyl)-5-[(5-_phosphoribosylamino)methylideneamino]imidazole-4-_carboxamide_isomerase
CRO	Kmers	AAAACAAACAGCCTTTCTTGA	Kmer	EA686_04220	3.94 E-10	type_I_secretion_protein
CRO	Kmers	TCACCTGTAACAGCCGATTCA	Kmer	EA686_02925	3.94 E-10	K(+)-transporting_ATPase_subunit_B
CRO	Kmers	GATAGCAAGGCTCAACTGGAA	Kmer	EA729_RS00435	3.94 E-10	methionine_ABC_transporter_ATP-binding_protein
CRO	Kmers	AATATCTTGTTTAAACGGTAA	Kmer	EA686_18045	3.94 E-10	adenosine_deaminase
CRO	Kmers	AGTTTAGAGACATATAACAAT	Kmer	EA702_RS06385	3.94 E-10	LTA_synthase_family_protein
CRO	Kmers	CAAGTTTGAAGGTGTATGGCA	Kmer	EA722_RS04070	3.94 E-10	PLP-dependent_aminotransferase_family_protein
CRO	Kmers	AGCTCACAGGTTCCGATGCAA	Kmer	EA722_RS16140	3.94 E-10	taurine_ABC_transporter_substrate-binding_protein
CRO	Kmers	ATTCATATCCCATGCAACATA	Kmer	EA664_RS12120	3.94 E-10	DUF4102_domain-containing_protein
CRO	Kmers	ACGGTGTTAGATTTTACTTTA	Kmer	EA686_00345	3.94 E-10	type_I_secretion_C-terminal_target_domain-containing_protein
CRO	Kmers	CTTTTGCTCGAATTTGATGGC	Kmer	EA702_RS11665	3.94 E-10	low_molecular_weight_phosphotyrosine_protein_phosphatase
CRO	Kmers	CACGAGCAAGAACAGGGTTTA	Kmer	EA686_01165	3.94 E-10	citrate_(Si)-synthase
CRO	Kmers	CCATCAGGCATAAGGTAAAAC	Kmer	EA686_00535	3.94 E-10	putative_pilus_assembly_protein_FilE
CRO	Kmers	AATACGCCAAGCTTTGCGATA	Kmer	EA722_RS01605	3.94 E-10	aldehyde_dehydrogenase
CRO	Kmers	GTTAAAGCCGAAGATGTACAA	Kmer	EA686_02400	3.94 E-10	cysteine_hydrolase
CRO	Kmers	ACGTAAAATGACTAAATAAAT	Kmer	EA686_05120	3.94 E-10	thioesterase_family_protein
CRO	Kmers	AAAATAAAATTATTGAGAGCG	Kmer	EA686_00535	3.94 E-10	putative_pilus_assembly_protein_FilE
CRO	Kmers	CATGGTTCAAAACTGATTCAA	Kmer	EA702_RS16700	3.94 E-10	acyl-CoA_carboxylase_subunit_beta
CRO	Kmers	CACCGATCCAGTCATTTCTGG	Kmer	EA702_RS06385	3.94 E-10	LTA_synthase_family_protein
CRO	Kmers	CACGACGAGCATAGTGACCTG	Kmer	EA722_RS10860	3.94 E-10	tRNA_2-thiouridine(34)_synthase_MnmA
CRO	Kmers	CCAGCAACGTTTAAATTTATC	Kmer	EA722_RS02735	3.94 E-10	ATP-dependent_protease
CRO	Kmers	AGGATAAGATTTGCTTTTAAA	Kmer	EA686_00535	3.94 E-10	putative_pilus_assembly_protein_FilE
CRO	Kmers	CTGATCACGTTTTACAAGGTA	Kmer	EA686_06000	3.94 E-10	UDP-N-acetylmuramate:L-alanyl-gamma-D-glutamyl-_meso-diaminopimelate_ligase
CRO	Kmers	ACCTGAAGGCCAGTACAACGC	Kmer	EA686_16395	3.94 E-10	hypothetical_protein
CRO	Kmers	CGAGTGGTACACCAGCTTTCA	Kmer	EA686_00515	3.94 E-10	type_II_secretion_system_F_family_protein
CRO	Kmers	ACCACTTTCTGTCTTGTAGAG	Kmer	EA722_RS11195	3.94 E-10	aromatic_ring-hydroxylating_dioxygenase_subunit_alpha
CRO	Kmers	CATGCCGACTCACTCACAGGC	Kmer	EA702_RS16210	3.94 E-10	excinuclease_ABC_subunit_UvrA
CRO	Kmers	CGAAAAACCATTAGAAGTTCG	Kmer	EA686_09495	3.94 E-10	50S_ribosomal_protein_L16
CRO	Kmers	ATCCAATACTTTAGAAACGTA	Kmer	EA702_RS06385	3.94 E-10	LTA_synthase_family_protein
CRO	Kmers	GCGCTGTGGCAATTTATCTAA	Kmer	EA722_RS12955	3.94 E-10	LysR_family_transcriptional_regulator
CRO	Kmers	CAGAAGCACCATCAGAAAGAG	Kmer	EA722_RS18770	3.94 E-10	acetyl-CoA_C-acyltransferase_FadA
CRO	Kmers	GAGTCTGGCTGCACGTCAGGC	Kmer	EA686_01005	3.94 E-10	outer_membrane_lipoprotein-sorting_protein
CRO	Kmers	AATATAAAGTGACTGTTGAAT	Kmer	EA702_RS08860	3.94 E-10	PLP-dependent_aminotransferase_family_protein
CRO	Kmers	AATGGTTGTGGTGGAGGAAGT	Kmer	EA686_00540	3.94 E-10	protein_FilF
CRO	Kmers	ATGGTCAGCAATCTTTTTCAA	Kmer	EA722_RS00835	3.94 E-10	hypothetical_protein
CRO	Kmers	AATTATGCTTTAACACATAGC	Kmer	EA702_RS08490	3.94 E-10	hypothetical_protein
CRO	Kmers	AGGTCATTATGCTCGTCGTGC	Kmer	EA686_00985	3.94 E-10	tRNA_2-thiouridine(34)_synthase_MnmA
CRO	Kmers	AAACTTATTTTTGTGGCAATC	Kmer	EA702_RS08465	3.94 E-10	chromate_efflux_transporter
CRO	Kmers	ACAGGTTCCGATGCAAAAGAT	Kmer	EA722_RS16140	3.94 E-10	taurine_ABC_transporter_substrate-binding_protein
CRO	Kmers	CAATACTTTAGAAACGTAAAA	Kmer	EA702_RS06385	3.94 E-10	LTA_synthase_family_protein
CRO	Kmers	CCCAATTTGGGAAGGCTTTAC	Kmer	EA722_RS06130	3.94 E-10	AEC_family_transporter
CRO	Kmers	AAAGCGACTTTTCATACTTAT	Kmer	EA702_RS06385	3.94 E-10	LTA_synthase_family_protein
CRO	Kmers	ACGAGCCACCAGTTGATGCCA	Kmer	EA722_RS02160	3.94 E-10	ATP-dependent_DNA_helicase_RecG
CRO	Kmers	GGCGAAAGGTATTCGCGTTAA	Kmer	EA686_08810	3.94 E-10	branched-chain_amino_acid_transaminase
CRO	Kmers	GTTCCTGTCTGTGCTCGCCCA	Kmer	EA686_16640	3.94 E-10	DEAD/DEAH_box_helicase
CRO	Kmers	TTGGCTGTTTAGGTTCCACAA	Kmer	EA686_28060	3.94 E-10	copper_oxidase
CRO	Kmers	AAAGGTTCAATACGCATATTG	Kmer	EA686_24350	3.94 E-10	FAD-dependent_oxidoreductase
CRO	Kmers	AAAAACCGCCTATCACAGGCG	Kmer	#N/A	3.94 E-10	intergenic
CRO	Kmers	ATACCTACCAAGTTTGAGAAA	Kmer	EA686_01080	3.94 E-10	bile_acid:sodium_symporter
CRO	Kmers	GAGTAAAGTGGTATCTACGCC	Kmer	EA686_03865	3.94 E-10	NAD(P)-dependent_oxidoreductase
CRO	Kmers	CACGTATCCAGGCTGTACAGC	Kmer	EA702_RS03205	3.94 E-10	transcription_termination/antitermination_protein_NusA
CRO	Kmers	TGTTAGCAACGCACGGTGCAA	Kmer	EA702_RS09750	3.94 E-10	ATP-dependent_RNA_helicase_HrpA
CRO	Kmers	GACAGGCAAGTCGGGGTGAGA	Kmer	EA722_RS15220	3.94 E-10	nitrogen_regulation_protein_NR(I)
CRO	Kmers	GGTGTTGCCACCAGATGCACA	Kmer	EA722_RS15275	3.94 E-10	class_I_SAM-dependent_methyltransferase
CRO	Kmers	AATGAAATTATCGGCAGGCCA	Kmer	EA686_27115	3.94 E-10	FAD-dependent_oxidoreductase
CRO	Kmers	CGTTTTAATTGATTTTTTATA	Kmer	EA686_00535	3.94 E-10	putative_pilus_assembly_protein_FilE
CRO	Kmers	TGCCCGGCATATTGACATCCA	Kmer	EA722_RS02825	3.94 E-10	response_regulator
CRO	Kmers	CCTGGATACGTGTTCCACGCA	Kmer	EA702_RS03205	3.94 E-10	transcription_termination/antitermination_protein_NusA
CRO	Kmers	CCAATAATTGTATAAAAACCG	Kmer	EA686_00535	3.94 E-10	putative_pilus_assembly_protein_FilE
CRO	Kmers	CAGCCTCAAGTAAGGCATCGC	Kmer	EA722_RS00190	3.94 E-10	phosphogluconate_dehydratase
CRO	Kmers	CTTAAAAGGTGAGGAACTCAC	Kmer	EA686_00345	3.94 E-10	type_I_secretion_C-terminal_target_domain-containing_protein
CRO	Kmers	AGACGTATCAACCTGCATGGG	Kmer	EA686_22920	3.94 E-10	PaaI_family_thioesterase
CRO	Kmers	CTGTGTATTATCTAACTGAAC	Kmer	EA664_RS05750	3.94 E-10	UDP-N-acetylglucosamine_2-epimerase_(non-hydrolyzing)
CRO	Kmers	TGGTGGTATCTCGTTTTTCAA	Kmer	EA686_11515	3.94 E-10	enoyl-CoA_hydratase
CRO	Kmers	GCAACGGTAATGCATGTTGCA	Kmer	EA722_RS13570	3.94 E-10	MFS_transporter
CRO	Kmers	AAGGTCAGCTACGCCCACGGC	Kmer	EA686_08600	3.94 E-10	ATP-binding_protein
CRO	Kmers	AGATCGGGCAAGTATCAATGA	Kmer	EA702_RS01270	3.94 E-10	protocatechuate_3,4-dioxygenase_subunit_beta
CRO	Kmers	AACTCTATTTTTCAGTTCCCC	Kmer	EA686_11515	3.94 E-10	enoyl-CoA_hydratase
CRO	Kmers	TCTAATTTATTGTCGCCTTCA	Kmer	EA702_RS06385	3.94 E-10	LTA_synthase_family_protein
CRO	Kmers	CAGCATTAGGAGCATGGATGG	Kmer	EA686_16455	3.94 E-10	prepilin_peptidase
CRO	Kmers	AATCAAGTTTCTAATTTATTG	Kmer	EA702_RS06385	3.94 E-10	LTA_synthase_family_protein
CRO	Kmers	CAATTGATTTTAAATAATAAG	Kmer	EA722_RS03210	3.94 E-10	LTA_synthase_family_protein
CRO	Kmers	AACTCTAACTTTAAATTGTCA	Kmer	EA686_01095	3.94 E-10	porin
CRO	Kmers	CAGCCATTAAGCCAGTTAACC	Kmer	EA722_RS14620	3.94 E-10	alpha/beta_fold_hydrolase
CRO	Kmers	ACTGATTCAGTGCGCCCCAAA	Kmer	EA686_00535	3.94 E-10	putative_pilus_assembly_protein_FilE
CRO	Kmers	AGATGTGCTTCCGGCTAGCCC	Kmer	EA686_01130	3.94 E-10	ParA_family_protein
CRO	Kmers	AGTCTAAATTATCTAAAGATG	Kmer	EA722_RS07005	3.94 E-10	GNAT_family_N-acetyltransferase
CRO	Kmers	AATAGGCACTGGCTCTGGATA	Kmer	EA686_00115	3.94 E-10	transcriptional_regulator
CRO	Kmers	AATGGCAGCAATTACTTACGC	Kmer	EA722_RS01405	3.94 E-10	aminotransferase_class_I/II-fold_pyridoxal_phosphate-dependent_enzyme
CRO	Kmers	AAGTAAACCTGATTGAAGTGA	Kmer	EA686_00345	3.94 E-10	type_I_secretion_C-terminal_target_domain-containing_protein
CRO	Kmers	TCGTAATAAGGTATATCCAGA	Kmer	EA702_RS06385	3.94 E-10	LTA_synthase_family_protein
CRO	Kmers	ACAACTATTTCCACTCTAAAG	Kmer	EA686_10055	3.94 E-10	TetR/AcrR_family_transcriptional_regulator
CRO	Kmers	CAGACGGTTTTTATACAATTA	Kmer	EA686_00535	3.94 E-10	putative_pilus_assembly_protein_FilE
CRO	Kmers	AAACAACTGTCATTGGCTTGA	Kmer	EA702_RS06825	3.94 E-10	aldehyde_dehydrogenase
CRO	Kmers	AGGCTTTTTAAATTAATCAGC	Kmer	EA664_RS17920	3.94 E-10	DUF4102_domain-containing_protein
CRO	Kmers	CACCAGATGCACATATCTTAA	Kmer	EA722_RS15275	3.94 E-10	class_I_SAM-dependent_methyltransferase
CRO	Kmers	ATCTTCAACACGTAAAGCCAC	Kmer	EA722_RS08050	3.94 E-10	translational_GTPase_TypA
CRO	Kmers	ATTTTTTCAATTCTTTTTAAC	Kmer	EA702_RS05820	3.94 E-10	site-specific_integrase
CRO	Kmers	ATTCAATAAAATGTGTAATTA	Kmer	EA702_RS14635	3.94 E-10	FAD-dependent_oxidoreductase
CRO	Kmers	AACGGTGATGCATGTTGCAAC	Kmer	EA686_06090	3.94 E-10	SmvA_family_efflux_MFS_transporter
CRO	Kmers	GAGCACATTCATCAGGCACGC	Kmer	EA686_01350	3.94 E-10	CHAD_domain-containing_protein
CRO	Kmers	CAACATTAGACGAATTACTAA	Kmer	EA686_00345	3.94 E-10	type_I_secretion_C-terminal_target_domain-containing_protein
CRO	Kmers	AACACGTATCCAAGCGGTACA	Kmer	EA686_00475	3.94 E-10	transcription_termination/antitermination_protein_NusA
CRO	Kmers	AAATCTGGGCAATATACTTTG	Kmer	EA702_RS14835	3.94 E-10	ABC_transporter_substrate-binding_protein
CRO	Kmers	AAGCGATGCGCACCTGCGTAA	Kmer	EA722_RS16665	3.94 E-10	divalent_metal_cation_transporter
CRO	Kmers	AGGCCTGTTCAAAACAGGCCC	Kmer	EA679_RS05075	3.94 E-10	amidophosphoribosyltransferase
CRO	Kmers	CCTCTTGTAAGCTCGTTGCCG	Kmer	EA722_RS10070	3.94 E-10	flavodoxin
CRO	Kmers	CATCAGAACCTGTGAGCTGCG	Kmer	EA686_06610	3.94 E-10	taurine_ABC_transporter_substrate-binding_protein
CRO	Kmers	GGCTTAAATCACATTCGCGAC	Kmer	EA722_RS07900	3.94 E-10	bifunctional_tetrahydrofolate_synthase/dihydrofolate_synthase
CRO	Kmers	TTACCGTTGCATCAATCGTAA	Kmer	EA722_RS13570	3.94 E-10	MFS_transporter
CRO	Kmers	AAATGGGGAATTTTCTTGGCT	Kmer	EA722_RS16115	3.94 E-10	NCS1_family_nucleobase:cation_symporter-1
CRO	Kmers	GTAGGGCTAGCGGGAAGCACA	Kmer	EA722_RS10480	3.94 E-10	ParA_family_protein
CRO	Kmers	GGAGCAACGAAACTTGCAGCA	Kmer	EA702_RS06385	3.94 E-10	LTA_synthase_family_protein
CRO	Kmers	CCTCTAATAACAAGCGAGCGC	Kmer	EA722_RS05520	3.94 E-10	alkene_reductase
CRO	Kmers	AACAACATGTCCAAGAAAAAT	Kmer	EA686_00535	3.94 E-10	putative_pilus_assembly_protein_FilE
CRO	Kmers	CCCATCCATAAACCCAGCGGA	Kmer	EA722_RS16130	3.94 E-10	taurine_ABC_transporter_permease_TauC
CRO	Kmers	AGGTCTCCTGCTAAACGCACA	Kmer	EA722_RS11570	3.94 E-10	acinetobactin_export_ABC_transporter_permease/ATP-binding_subunit_BarB
CRO	Kmers	TAAAAAGGGTATGAAAATAGA	Kmer	EA702_RS17660	3.94 E-10	hypothetical_protein
CRO	Kmers	GAGTTAGCCAAGAAAGAGGCA	Kmer	EA686_08200	3.94 E-10	RtcB_family_protein
CRO	Kmers	CTACTGATTCAGTGCGCCCCA	Kmer	EA686_00535	3.94 E-10	putative_pilus_assembly_protein_FilE
CRO	Kmers	GACAAAATCATATAGAGCACA	Kmer	EA686_05220	3.94 E-10	EamA_family_transporter
CRO	Kmers	CTGCAAGTATTCTTTTTCGTC	Kmer	EA686_13280	3.94 E-10	ATP-binding_protein
CRO	Kmers	CAAGAAAGAGGCACAACATCG	Kmer	EA686_08200	3.94 E-10	RtcB_family_protein
CRO	Kmers	AATTCAAATATATAGCAGTTG	Kmer	EA679_RS18120	3.94 E-10	hypothetical_protein
CRO	Kmers	AGGTTTATGCTCAGGCGGATG	Kmer	EA722_RS00570	3.94 E-10	catalase/peroxidase_HPI
CRO	Kmers	ATCGTTTTGCTGCCAGTGAAG	Kmer	EA722_RS12895	3.94 E-10	MFS_transporter
CRO	Kmers	AAAGCTCAAAAATATGGTCGT	Kmer	EA702_RS08360	3.94 E-10	3-hydroxybutyrate_dehydrogenase
CRO	Kmers	ATAATTCCTTAAATGTTGAAT	Kmer	EA686_27440	3.94 E-10	hypothetical_protein
CRO	Kmers	AACTTATGGCCACGGAAGCCA	Kmer	EA686_00535	3.94 E-10	putative_pilus_assembly_protein_FilE
CRO	Kmers	ATTGGTACAGCTGAAACCTAC	Kmer	EA686_28060	3.94 E-10	copper_oxidase
CRO	Kmers	CAGATTCGTTTGCCGTACTTA	Kmer	EA722_RS01750	3.94 E-10	alpha/beta_hydrolase
CRO	Kmers	TATGCGTCTTCTCTCCAATAA	Kmer	EA686_03965	3.94 E-10	magnesium_transporter
CRO	Kmers	AACAACTCGCGTGGAGTACGG	Kmer	EA722_RS10070	3.94 E-10	flavodoxin
CRO	Kmers	CGTCGCATAGTAAGACGTATC	Kmer	EA686_22920	3.94 E-10	PaaI_family_thioesterase
CRO	Kmers	AAAGTACCGCCTTCAGCACAT	Kmer	EA686_00535	3.94 E-10	putative_pilus_assembly_protein_FilE
CRO	Kmers	ATATATGGATTGGTTTAAAAA	Kmer	EA686_03620	3.94 E-10	metal-dependent_hydrolase
CRO	Kmers	CAGCCATTAAGTCAGTTAACC	Kmer	EA686_17650	3.94 E-10	alpha/beta_fold_hydrolase
CRO	Kmers	AGATCGGAGTAACATATTTAA	Kmer	EA702_RS06385	3.94 E-10	LTA_synthase_family_protein
CRO	Kmers	AATTACTTACGCAATTCAGAC	Kmer	EA722_RS01405	3.94 E-10	aminotransferase_class_I/II-fold_pyridoxal_phosphate-dependent_enzyme
CRO	Kmers	AATTAAACTAATTATTGCGGT	Kmer	EA686_18250	3.94 E-10	HlyD_family_secretion_protein
CRO	Kmers	AAGCCAGATAAAATTAAAACC	Kmer	EA722_RS04430	3.94 E-10	alpha/beta_hydrolase
CRO	Kmers	CTAAACGAGCGCTTTCACTAA	Kmer	EA686_06000	3.94 E-10	UDP-N-acetylmuramate:L-alanyl-gamma-D-glutamyl-_meso-diaminopimelate_ligase
CRO	Kmers	AATATCAAAAATTAAAGTACT	Kmer	EA686_00620	3.94 E-10	FKBP-type_peptidyl-prolyl_cis-trans_isomerase
CRO	Kmers	TAACAATTCATTTGGGAAAAA	Kmer	EA702_RS06385	3.94 E-10	LTA_synthase_family_protein
CRO	Kmers	GGTTTTCTTGTTTGGCTTTAA	Kmer	EA686_14275	3.94 E-10	fumarate_reductase/succinate_dehydrogenase_flavoprotein_subunit
CRO	Kmers	AGTTAAATAAAACATGGCAAA	Kmer	EA722_RS17960	3.94 E-10	glucose_1-dehydrogenase
CRO	Kmers	AATGTCACAGCCTTTTGCAAT	Kmer	EA722_RS09235	3.94 E-10	thiamine_pyrophosphate-dependent_dehydrogenase_E1_component_subunit_alpha
CRO	Kmers	AAATACAAAAACTGTTTCAGT	Kmer	EA686_00535	3.94 E-10	putative_pilus_assembly_protein_FilE
CRO	Kmers	ACCTTGCAGATGTTAAAGGTC	Kmer	EA722_RS02735	3.94 E-10	ATP-dependent_protease
CRO	Kmers	AAAATTCAAGATTATGGGTTT	Kmer	EA702_RS06385	3.94 E-10	LTA_synthase_family_protein
CRO	Kmers	CAGGGACCGCAGCAGCACTTA	Kmer	EA686_09930	3.94 E-10	GtrA_family_protein
CRO	Kmers	ACTTATGGTGTACCAGTTGAA	Kmer	EA686_21430	3.94 E-10	fructose-bisphosphate_aldolase_class_II
CRO	Kmers	CGAGTAAAGTGGTATCTACGC	Kmer	EA686_03865	3.94 E-10	NAD(P)-dependent_oxidoreductase
CRO	Kmers	TAAGCGATGCGCACCTGCGTA	Kmer	EA722_RS16665	3.94 E-10	divalent_metal_cation_transporter
CRO	Kmers	ATGTTTTACAAGGTAAACATG	Kmer	EA722_RS11160	3.94 E-10	UDP-N-acetylmuramate:L-alanyl-gamma-D-glutamyl-_meso-diaminopimelate_ligase
CRO	Kmers	AACGGCGTAAGCTTACACGTG	Kmer	EA722_RS06795	3.94 E-10	CYTH_and_CHAD_domain-containing_protein
CRO	Kmers	AATTTAAGTAAATTAAACCAC	Kmer	EA702_RS06385	3.94 E-10	LTA_synthase_family_protein
CRO	Kmers	GCTCGCTTGTTATTAGAGGTA	Kmer	EA722_RS05520	3.94 E-10	alkene_reductase
CRO	Kmers	CCATCTGGCCCAATAATTGTA	Kmer	EA686_00535	3.94 E-10	putative_pilus_assembly_protein_FilE
CRO	Kmers	CGGCACACCATCCATTAACCC	Kmer	EA686_25785	3.94 E-10	copper_oxidase
CRO	Kmers	AGCTTTTTTAATTTCTTTCTG	Kmer	EA722_RS06415	3.94 E-10	cache_protein
CRO	Kmers	CAATGGCGAAAGGTATTCGCG	Kmer	EA686_08810	3.94 E-10	branched-chain_amino_acid_transaminase
CRO	Kmers	AGACGTTCGTTATCAACAATA	Kmer	EA722_RS09650	3.94 E-10	hypothetical_protein
CRO	Kmers	GTTGCCACTAAACCGTCACGA	Kmer	EA686_20745	3.94 E-10	catechol_1,2-dioxygenase
CRO	Kmers	AGTACAACGCCTTAATGAATA	Kmer	EA686_16395	3.94 E-10	hypothetical_protein
CRO	Kmers	GAGCTTTCTTGCAAAGTTAGC	Kmer	EA708_RS07420	3.94 E-10	long-chain-fatty-acid--CoA_ligase
CRO	Kmers	GAATCACTTGTTTGCCCAGCC	Kmer	#N/A	3.94 E-10	intergenic
CRO	Kmers	ATGGGATATGAATCTAACTTG	Kmer	#N/A	3.94 E-10	intergenic
CRO	Kmers	CAAGATAAGTGCTTTATTAAA	Kmer	EA686_00535	3.94 E-10	putative_pilus_assembly_protein_FilE
CRO	Kmers	AAATTAGAAACTTGATTTTGG	Kmer	EA702_RS06385	3.94 E-10	LTA_synthase_family_protein
CRO	Kmers	AAAAATGATAAAAATATTCAT	Kmer	EA702_RS06905	3.94 E-10	DEAD/DEAH_box_helicase
CRO	Kmers	AGTATGATAAGAAAGAAAATA	Kmer	EA702_RS06385	3.94 E-10	LTA_synthase_family_protein
CRO	Kmers	GCGCCTTTATCGAGTAAGCGA	Kmer	EA722_RS16665	3.94 E-10	divalent_metal_cation_transporter
CRO	Kmers	AGTACTTATACTGCTGGAACT	Kmer	EA702_RS06385	3.94 E-10	LTA_synthase_family_protein
CRO	Kmers	ACATTCCTGTTCAAAAATGCC	Kmer	EA686_07915	3.94 E-10	exonuclease_V_subunit_amma
CRO	Kmers	ATTGAAAAAAGTATTGCGCCG	Kmer	EA722_RS13850	3.94 E-10	4-hydroxybenzoate_3-monooxygenase
CRO	Kmers	ATCGACAAAATCATATAGAGC	Kmer	EA686_05220	3.94 E-10	EamA_family_transporter
CRO	Kmers	TGTGATTGCGGGTTTGTTTAA	Kmer	EA686_04875	3.94 E-10	DUF2474_domain-containing_protein
CRO	Kmers	TTAATGCTCGGTTGTCAGAAA	Kmer	EA686_27425	3.94 E-10	3-deoxy-D-manno-octulosonic_acid_transferase
CRO	Kmers	CGCGACAGGTCAAGTAGGACG	Kmer	EA686_01895	3.94 E-10	phosphogluconate_dehydratase
CRO	Kmers	CTTGAATTTTTCGGTAATCAC	Kmer	EA702_RS06385	3.94 E-10	LTA_synthase_family_protein
CRO	Kmers	CAAATATAAAGTGACTGTTGA	Kmer	EA702_RS08860	3.94 E-10	PLP-dependent_aminotransferase_family_protein
CRO	Kmers	CATATCTGCTTTGCCGGTTGC	Kmer	EA722_RS17585	3.94 E-10	NADPH-dependent_2,4-dienoyl-CoA_reductase
CRO	Kmers	GCTCAGCCATTAAGTCAGTTA	Kmer	EA686_17650	3.94 E-10	alpha/beta_fold_hydrolase
CRO	Kmers	GAGCAACGAAACTTGCAGCAA	Kmer	EA702_RS06385	3.94 E-10	LTA_synthase_family_protein
CRO	Kmers	CATAACGAGCCTATGCCGTTA	Kmer	EA702_RS08770	3.94 E-10	cytochrome_ubiquinol_oxidase_subunit_I
CRO	Kmers	TAAAGGCGTCATCATAATATA	Kmer	EA686_00535	3.94 E-10	putative_pilus_assembly_protein_FilE
CRO	Kmers	AAAAAATCAATTAAAACGCTT	Kmer	EA686_00535	3.94 E-10	putative_pilus_assembly_protein_FilE
CRO	Kmers	ACATACCTACCAAGTTTGAGA	Kmer	EA686_01080	3.94 E-10	bile_acid:sodium_symporter
CRO	Kmers	AGAAAAGGCTATTTTTTCAAT	Kmer	EA703_RS10290	3.94 E-10	amino_acid_adenylation_domain-containing_protein
CRO	Kmers	AATCCTAACTCTGGATATACC	Kmer	EA702_RS06385	3.94 E-10	LTA_synthase_family_protein
CRO	Kmers	CAAAAATACAACGAGTGGCCA	Kmer	EA686_00535	3.94 E-10	putative_pilus_assembly_protein_FilE
CRO	Kmers	AGTTGAGCAGCTTGTAGAAGC	Kmer	EA702_RS13335	3.94 E-10	fructose-bisphosphate_aldolase_class_II
CRO	Kmers	AATTTCTTGCGCCCAATTTTA	Kmer	EA722_RS13100	3.94 E-10	MFS_transporter
CRO	Kmers	CTCATTATTTTCTTTCTTATC	Kmer	EA702_RS06385	3.94 E-10	LTA_synthase_family_protein
CRO	Kmers	CGGCTACTTCATTGTGTCTGC	Kmer	EA722_RS13080	3.94 E-10	phenylacetic_acid_degradation_bifunctional_protein_PaaZ
CRO	Kmers	AGGAACAGGTAAGACTGCTGC	Kmer	EA686_16640	3.94 E-10	DEAD/DEAH_box_helicase
CRO	Kmers	AATCAATTAAAACGCTTAGCA	Kmer	EA686_00535	3.94 E-10	putative_pilus_assembly_protein_FilE
CRO	Kmers	CAATGGCCCCATCCATGCACC	Kmer	EA702_RS03160	3.94 E-10	prepilin_peptidase
CRO	Kmers	AGGGGGCTGGGCCACAGATGA	Kmer	EA702_RS06385	3.94 E-10	LTA_synthase_family_protein
CRO	Kmers	GTGACATCATTTTAGGTTTGA	Kmer	EA686_17180	3.94 E-10	DMT_family_transporter
CRO	Kmers	CATAAACCCAGCGGAACACCA	Kmer	EA722_RS16130	3.94 E-10	taurine_ABC_transporter_permease_TauC
CRO	Kmers	ACTCTATTGAAGATGCTTTGG	Kmer	EA722_RS12230	3.94 E-10	CoA_transferase
CRO	Kmers	AGAAATTAAAAAAGCTCTCTC	Kmer	EA722_RS06415	3.94 E-10	cache_protein
CRO	Kmers	ACGCAGGTGCGCATCGCTTAC	Kmer	EA722_RS16665	3.94 E-10	divalent_metal_cation_transporter
CRO	Kmers	AAAGAAATTAAAAAAGCTCTC	Kmer	EA722_RS06415	3.94 E-10	cache_protein
CRO	Kmers	CAACGTGGCTTTACGTGTTGA	Kmer	EA722_RS08050	3.94 E-10	translational_GTPase_TypA
CRO	Kmers	GGCCGTAGCTGACCTTTAACA	Kmer	EA722_RS02735	3.94 E-10	ATP-dependent_protease
CRO	Kmers	AATGGCTCAGCAACGTTTAAA	Kmer	EA686_16620	3.94 E-10	ATP-binding_protein
CRO	Kmers	CATAGACGAACCAGATGAGAG	Kmer	EA686_08280	3.94 E-10	ABC_transporter_substrate-binding_protein
CRO	Kmers	TTATACTGCATCTATTGATAA	Kmer	EA702_RS03660	3.94 E-10	uracil_phosphoribosyltransferase
CRO	Kmers	GGTTCCACGGCACTAATGAAA	Kmer	EA686_13580	3.94 E-10	amino_acid_permease
CRO	Kmers	TAGCTTTACGTGTTGAAGATA	Kmer	EA686_05180	3.94 E-10	translational_GTPase_TypA
CRO	Kmers	AAATGCCCTATAAATTTGACC	Kmer	EA722_RS02735	3.94 E-10	ATP-dependent_protease
CRO	Kmers	GCTGGTTACATTATCCAATAC	Kmer	EA702_RS06385	3.94 E-10	LTA_synthase_family_protein
CRO	Kmers	CGGGATATCTTTTGCATCGGA	Kmer	EA722_RS16140	3.94 E-10	taurine_ABC_transporter_substrate-binding_protein
CRO	Kmers	ACTTTTGCTCGAATTTGATGG	Kmer	EA702_RS11665	3.94 E-10	low_molecular_weight_phosphotyrosine_protein_phosphatase
CRO	Kmers	AGTTAGTGAATCTTGCACTTC	Kmer	EA722_RS02030	3.94 E-10	glycine--tRNA_ligase_subunit_beta
CRO	Kmers	CGCTATCAGGCGCGTCGCCGC	Kmer	EA722_RS03590	3.94 E-10	chromosome_segregation_protein_SMC
CRO	Kmers	ACTTTATAAAGCCTTGCAAGA	Kmer	EA686_19040	3.94 E-10	signal_recognition_particle-docking_protein_FtsY
CRO	Kmers	CGCTCTACTGATTCAGTGCGC	Kmer	EA686_00535	3.94 E-10	putative_pilus_assembly_protein_FilE
CRO	Kmers	CAGGTTATGGTGAACCTCAAG	Kmer	EA722_RS12880	3.94 E-10	PLP-dependent_aminotransferase_family_protein
CRO	Kmers	CAGCGCCTTTATCGAGTAAGC	Kmer	EA722_RS16665	3.94 E-10	divalent_metal_cation_transporter
CRO	Kmers	AATAGCCTTTTCTGAAATCAA	Kmer	EA682_RS08030	3.94 E-10	hypothetical_protein
CRO	Kmers	AAGATACGATCCATTGCACGT	Kmer	EA702_RS10310	3.94 E-10	citrate_(Si)-synthase
CRO	Kmers	AAAGGGTATGAAAATAGATTT	Kmer	EA677_28495	3.94 E-10	chromosome_segregation_protein_SMC
CRO	Kmers	TCTACTGCTGTTGCCACTAAA	Kmer	EA686_20745	3.94 E-10	catechol_1,2-dioxygenase
CRO	Kmers	ATTGGCGAATGAAGGAATGAC	Kmer	EA686_14380	3.94 E-10	amino_acid_ABC_transporter_ATP-binding_protein
CRO	Kmers	CAGAGCCAGTGCCTATTTGTA	Kmer	EA686_00115	3.94 E-10	transcriptional_regulator
CRO	Kmers	CTTCACAACAAAGTGCTACGC	Kmer	EA722_RS02985	3.94 E-10	general_secretion_pathway_protein
CRO	Kmers	AACATGTTCAGGCAAGCCGCG	Kmer	EA686_28350	3.94 E-10	tRNA_(uridine(34)/cytosine(34)/5-_carboxymethylaminomethyluridine(34)-2'-O)-_methyltransferase_TrmL
CRO	Kmers	AACTCCACATCGGAAAGTAGA	Kmer	EA722_RS07595	3.94 E-10	DMT_family_transporter
CRO	Kmers	AAGGCAACGTCTACAGTTATA	Kmer	#N/A	3.94 E-10	intergenic
CRO	Kmers	ACGTAAAGCCACGTTGTGAAT	Kmer	EA722_RS08050	3.94 E-10	translational_GTPase_TypA
CRO	Kmers	AAAAAACGCCAAAAATTTTCT	Kmer	EA722_RS13485	3.94 E-10	DedA_family_protein
CRO	Kmers	AATTTATCTAAAACCGCGGCA	Kmer	EA722_RS12955	3.94 E-10	LysR_family_transcriptional_regulator
CRO	Kmers	CGAGTAAATAAATTAATCGCG	Kmer	EA702_RS08950	3.94 E-10	amino_acid_ABC_transporter_permease
CRO	Kmers	AGATACTTTACGACTAGGTAA	Kmer	EA702_RS06385	3.94 E-10	LTA_synthase_family_protein
CRO	Kmers	CCGCTGTTTTTGTCCTCCAGA	Kmer	EA702_RS14850	3.94 E-10	ABC_transporter_ATP-binding_protein
CRO	Kmers	ACGCCGTGGGCGTAGCTGACC	Kmer	EA686_08600	3.94 E-10	ATP-binding_protein
CRO	Kmers	ATACAATCTTCACTTAAATTA	Kmer	EA696_RS01255	3.94 E-10	TonB-dependent_receptor
CRO	Kmers	GAAATTATCGGCAGGCCATTC	Kmer	EA686_27115	3.94 E-10	FAD-dependent_oxidoreductase
CRO	Kmers	GTTATTTACAGGTTGACCGTA	Kmer	EA722_RS15245	3.94 E-10	acetyl/propionyl/methylcrotonyl-CoA_carboxylase_subunit_alpha
CRO	Kmers	ATCGAGTGAAGAATCGGAGGA	Kmer	EA686_00535	3.94 E-10	putative_pilus_assembly_protein_FilE
CRO	Kmers	ATGCTTGGGATAAACCTGAAT	Kmer	EA722_RS17025	3.94 E-10	DNA_mismatch_repair_endonuclease_MutL
CRO	Kmers	ATTTACAGGTTGACCGTATTA	Kmer	EA722_RS15245	3.94 E-10	acetyl/propionyl/methylcrotonyl-CoA_carboxylase_subunit_alpha
CRO	Kmers	TAGTTCTCGTTCCTCCACCAA	Kmer	EA686_00535	3.94 E-10	putative_pilus_assembly_protein_FilE
CRO	Kmers	CAGCTAAACCAATCAAACCTA	Kmer	EA686_17180	3.94 E-10	DMT_family_transporter
CRO	Kmers	AATGATGACAGGCAAGTCGGG	Kmer	EA722_RS15220	3.94 E-10	nitrogen_regulation_protein_NR(I)
CRO	Kmers	ACGCCCACGGCGTGCACTAGA	Kmer	EA686_08600	3.94 E-10	ATP-binding_protein
CRO	Kmers	GAACGACAGCATCGGTTAAGA	Kmer	EA686_20810	3.94 E-10	dihydrolipoyl_dehydrogenase
CRO	Kmers	ACGCTTTTTCTGCCGGGTCTG	Kmer	EA686_26415	3.94 E-10	succinate_dehydrogenase_assembly_factor_2
CRO	Kmers	ATCTATACGGGAAAGATGATG	Kmer	EA722_RS13320	3.94 E-10	1-aminocyclopropane-1-carboxylate_deaminase/D-cysteine_desulfhydrase
CRO	Kmers	CATTGAAATCGCCCCACTGCG	Kmer	EA702_RS08455	3.94 E-10	fumarate_reductase/succinate_dehydrogenase_flavoprotein_subunit
CRO	Kmers	CAAAGTAAAAAGGGTATGAAA	Kmer	EA702_RS17660	3.94 E-10	hypothetical_protein
CRO	Kmers	GGCTACTGCTATTTCCGACCC	Kmer	EA686_11725	3.94 E-10	penicillin-binding_protein_2
CRO	Kmers	CCATTATCAATAGATGCAGTA	Kmer	EA702_RS03660	3.94 E-10	uracil_phosphoribosyltransferase
CRO	Kmers	GAACCAAGCTTTGTCGGAATA	Kmer	EA722_RS06550	3.94 E-10	GntR_family_transcriptional_regulator
CRO	Kmers	AGGTTTCAGCTGTACCAATAC	Kmer	EA686_28060	3.94 E-10	copper_oxidase
CRO	Kmers	CTTCATGCAAAGTATATTGCC	Kmer	EA702_RS14835	3.94 E-10	ABC_transporter_substrate-binding_protein
CRO	Kmers	AAAGCCCGCTGAGAGCACCAC	Kmer	EA686_10215	3.94 E-10	malonate_decarboxylase_subunit_alpha
CRO	Kmers	CACTGATTTTAATTAGCCATG	Kmer	EA722_RS14110	3.94 E-10	ABC_transporter_ATP-binding_protein
CRO	Kmers	GAAAAAATAGCCTTTTCTGAA	Kmer	EA703_RS10290	3.94 E-10	amino_acid_adenylation_domain-containing_protein
CRO	Kmers	AAGGCTTTGCAACTATTAACG	Kmer	EA722_RS12555	3.94 E-10	K(+)-transporting_ATPase_subunit_B
CRO	Kmers	CGTAATAAACATACCTACCAA	Kmer	EA686_01080	3.94 E-10	bile_acid:sodium_symporter
CRO	Kmers	AAATCGCCCCACTGCGCTTTA	Kmer	EA702_RS08455	3.94 E-10	fumarate_reductase/succinate_dehydrogenase_flavoprotein_subunit
CRO	Kmers	GTATGAAAATAGATTTTTTAA	Kmer	EA686_27590	3.94 E-10	CapA_family_protein
CRO	Kmers	ACCTGTGGCGAATTGCTGGCG	Kmer	EA722_RS00190	3.94 E-10	phosphogluconate_dehydratase
CRO	Kmers	AGAACCTGTGAGCTGCGCAAT	Kmer	EA686_06610	3.94 E-10	taurine_ABC_transporter_substrate-binding_protein
CRO	Kmers	GTTAAAGGTCAGCTACGCCCA	Kmer	EA686_08600	3.94 E-10	ATP-binding_protein
CRO	Kmers	AGACTGATCAGCAGACTTCGG	Kmer	EA686_23920	3.94 E-10	TonB-dependent_siderophore_receptor
CRO	Kmers	ATGGGGAATTTTCTTGGCTTA	Kmer	EA722_RS16115	3.94 E-10	NCS1_family_nucleobase:cation_symporter-1
CRO	Kmers	ATCGTAGGTTTCAGCTGTACC	Kmer	EA686_28060	3.94 E-10	copper_oxidase
CRO	Kmers	AAGAAAATTCCCCATTTTAAT	Kmer	EA722_RS16115	3.94 E-10	NCS1_family_nucleobase:cation_symporter-1
CRO	Kmers	ACGGCCCGGCCCACCAATTCT	Kmer	EA686_04935	3.94 E-10	VWA_domain-containing_protein
CRO	Kmers	AATTTAGCGCAGGAATTAGGG	Kmer	EA702_RS09865	3.94 E-10	SDR_family_oxidoreductase
CRO	Kmers	AACTACAGGGCCGGTGTTGTA	Kmer	EA686_14645	3.94 E-10	amino_acid_permease
CRO	Kmers	AACCACCATTTTCAACATTTA	Kmer	EA722_RS06445	3.94 E-10	arginine_N-succinyltransferase
CRO	Kmers	GGTGAATACCGGTGGGCGCAA	Kmer	EA702_RS01610	3.94 E-10	type_II_toxin-antitoxin_system_HipA_family_toxin
CRO	Kmers	GTGCGTTTAGCAGGAGACCTA	Kmer	EA722_RS11570	3.94 E-10	acinetobactin_export_ABC_transporter_permease/ATP-binding_subunit_BarB
CRO	Kmers	AAAATTAGCTAATAATTGATA	Kmer	EA686_13030	3.94 E-10	sodium-dependent_transporter
CRO	Kmers	CTAAATTCAAATATATAGCAG	Kmer	EA679_RS18120	3.94 E-10	hypothetical_protein
CRO	Kmers	CCTGTACCTGTCTGTGCTCGC	Kmer	EA702_RS14255	3.94 E-10	ATP-dependent_RNA_helicase_RhlB
CRO	Kmers	CAAATGTGGTGCTCTCAGCGG	Kmer	EA686_10215	3.94 E-10	malonate_decarboxylase_subunit_alpha
CRO	Kmers	TGTCATAATGATGACAGGCAA	Kmer	EA722_RS15220	3.94 E-10	nitrogen_regulation_protein_NR(I)
CRO	Kmers	AGACAGGAACAGGTAAGACTG	Kmer	EA686_16640	3.94 E-10	DEAD/DEAH_box_helicase
CRO	Kmers	AGATAATTCCTTAAATGTTGA	Kmer	EA686_27440	3.94 E-10	hypothetical_protein
CRO	Kmers	AACTGACTTAATGGCTGAGCT	Kmer	EA686_17650	3.94 E-10	alpha/beta_fold_hydrolase
CRO	Kmers	AATGAGAAGCCTCTATATTAT	Kmer	EA686_00535	3.94 E-10	putative_pilus_assembly_protein_FilE
CRO	Kmers	CTGCATAAGATACAGAAATAC	Kmer	EA686_00535	3.94 E-10	putative_pilus_assembly_protein_FilE
CRO	Kmers	ATAACAGTTGTTGACGTAGAA	Kmer	EA686_05305	3.94 E-10	HlyC/CorC_family_transporter
CRO	Kmers	AATAAGGAAGTAAACTTATGG	Kmer	EA686_00535	3.94 E-10	putative_pilus_assembly_protein_FilE
CRO	Kmers	ATGCTTTAACACATAGCATGC	Kmer	EA702_RS08490	3.94 E-10	hypothetical_protein
CRO	Kmers	ATCTTTACCCAATTGCTCGGC	Kmer	EA722_RS17835	3.94 E-10	DUF885_domain-containing_protein
CRO	Kmers	GATATTGTTAAATTAAAATGA	Kmer	EA722_RS19530	3.94 E-10	ABC_transporter_ATP-binding_protein
CRO	Kmers	GCAAGTTAACTGCACTTCAGC	Kmer	EA686_28070	3.94 E-10	primosomal_protein_N'
CRO	Kmers	CTGAGTTTTGGACATCTCAAC	Kmer	EA686_24180	3.94 E-10	DNA_mismatch_repair_protein_MutL
CRO	Kmers	ACTTCACTGGCAGCAAAACGG	Kmer	EA686_10210	3.94 E-10	MFS_transporter
CRO	Kmers	GTATGGCAAACATAGTAGCCA	Kmer	EA722_RS04070	3.94 E-10	PLP-dependent_aminotransferase_family_protein
CRO	Kmers	ACAGTCACTTTATATTTGCAG	Kmer	EA702_RS08860	3.94 E-10	PLP-dependent_aminotransferase_family_protein
CRO	Kmers	AATTACTTATTCGTGTTTCAC	Kmer	EA702_RS01610	3.94 E-10	type_II_toxin-antitoxin_system_HipA_family_toxin
CRO	Kmers	TCGACAAACTCAAGACCAAGA	Kmer	EA686_00535	3.94 E-10	putative_pilus_assembly_protein_FilE
CRO	Kmers	CAAGATATTATCGCTGTAGGA	Kmer	EA686_18045	3.94 E-10	adenosine_deaminase
CRO	Kmers	ATAACGTACACTTTGCCTTAC	Kmer	EA702_RS08920	3.94 E-10	LysE_family_translocator
CRO	Kmers	GGACCAATGATAAATTTGTGA	Kmer	EA686_08925	3.94 E-10	cation_transporter
CRO	Kmers	ACGATGTTGATATTACTGCTC	Kmer	EA686_03880	3.94 E-10	hypothetical_protein
CRO	Kmers	AACCACAAAAGGTATAAGGTC	Kmer	EA722_RS11595	3.94 E-10	(2,3-dihydroxybenzoyl)adenylate_synthase
CRO	Kmers	TCGTAAAGTATCTGAGCAAGA	Kmer	EA702_RS06385	3.94 E-10	LTA_synthase_family_protein
CRO	Kmers	ATAGTAAGACGTATCAACCTG	Kmer	EA686_22920	3.94 E-10	PaaI_family_thioesterase
CRO	Kmers	CATTTAAGCCATTGTCAATAG	Kmer	EA686_16340	3.94 E-10	uracil_phosphoribosyltransferase
CRO	Kmers	CGTTGCTGAAATTGAGAAACG	Kmer	EA702_RS15935	3.94 E-10	Lon_protease
CRO	Kmers	ATTCGATTAAGTCTACTTTAA	Kmer	EA702_RS06385	3.94 E-10	LTA_synthase_family_protein
CRO	Kmers	ACTTCAATCAGGTTTACTTAA	Kmer	EA686_00345	3.94 E-10	type_I_secretion_C-terminal_target_domain-containing_protein
CRO	Kmers	AACTTCCTCCACCACAACCAT	Kmer	EA686_00540	3.94 E-10	protein_FilF
CRO	Kmers	CGGTAATCACCGATCCAGTCA	Kmer	EA702_RS06385	3.94 E-10	LTA_synthase_family_protein
CRO	Kmers	TGACAATGGCTTAAATGAACA	Kmer	EA686_16340	3.94 E-10	uracil_phosphoribosyltransferase
CRO	Kmers	AAGTGATATAAATTTCTCAAA	Kmer	EA702_RS06385	3.94 E-10	LTA_synthase_family_protein
CRO	Kmers	GCCATCAGCCGCTTTTTTATA	Kmer	EA686_03980	3.94 E-10	heme-binding_protein
CRO	Kmers	AGAGAAGACGCATAGTTCTCA	Kmer	EA686_03965	3.94 E-10	magnesium_transporter
CRO	Kmers	GTTTTGAACAGGCCTTTTTTA	Kmer	EA682_RS02965	3.94 E-10	RHS_repeat_protein
CRO	Kmers	GTCTCTAAACTAAAAAAACCA	Kmer	EA702_RS06385	3.94 E-10	LTA_synthase_family_protein
CRO	Kmers	TACGACTGAACATATTCGTGA	Kmer	EA702_RS08490	3.94 E-10	hypothetical_protein
CRO	Kmers	AGTCCAAAGATAATAATATTA	Kmer	EA702_RS06385	3.94 E-10	LTA_synthase_family_protein
CRO	Kmers	ATTGTCGAACTTCCTCCACCA	Kmer	EA686_00540	3.94 E-10	protein_FilF
CRO	Kmers	TGCTGTAATTGTTGATGGTAA	Kmer	EA722_RS03470	3.94 E-10	pyridoxal-phosphate_dependent_enzyme
CRO	Kmers	CAATTCGCGACAGGTCAAGTA	Kmer	EA686_01895	3.94 E-10	phosphogluconate_dehydratase
CRO	Kmers	AGGTTATGTGGATGGCGCTGG	Kmer	EA686_04220	3.94 E-10	type_I_secretion_protein
CRO	Kmers	AAAAACAGCGGGTGATGATTG	Kmer	EA686_09695	3.94 E-10	ABC_transporter_ATP-binding_protein
CRO	Kmers	ATTTTTCGGTAATCACCGATC	Kmer	EA702_RS06385	3.94 E-10	LTA_synthase_family_protein
CRO	Kmers	CATGATAAGCAGCTGATTCAG	Kmer	EA722_RS00190	3.94 E-10	phosphogluconate_dehydratase
CRO	Kmers	ATAGACGAACCAGATGAGAGG	Kmer	EA686_08280	3.94 E-10	ABC_transporter_substrate-binding_protein
CRO	Kmers	GTGAGTAAGCAATTAAAAATA	Kmer	EA722_RS02155	3.94 E-10	ComF_family_protein
CRO	Kmers	ACCTGACACGTTACCAGCGCC	Kmer	EA686_04220	3.94 E-10	type_I_secretion_protein
CRO	Kmers	AATTTTTCTTGGACATGTTGT	Kmer	EA686_00535	3.94 E-10	putative_pilus_assembly_protein_FilE
CRO	Kmers	CTGTGGCGAATTGCTGGCGGA	Kmer	EA722_RS00190	3.94 E-10	phosphogluconate_dehydratase
CRO	Kmers	AGCTGCACCTTTCAACTGTCC	Kmer	EA686_10060	3.94 E-10	methyltransferase
CRO	Kmers	CTTTAGTCAATGGAATCACGC	Kmer	EA722_RS14260	3.94 E-10	glutamine--tRNA_ligase/YqeY_domain_fusion_protein
CRO	Kmers	ATTAAGCCAGTTAACCAGTAG	Kmer	EA722_RS14620	3.94 E-10	alpha/beta_fold_hydrolase
CRO	Kmers	ACATGTCCAAGAAAAATTAAA	Kmer	EA686_00535	3.94 E-10	putative_pilus_assembly_protein_FilE
CRO	Kmers	AAGGTTTTTTCTGCCGCAAAA	Kmer	EA686_28255	3.94 E-10	outer_membrane_lipoprotein-sorting_protein
CRO	Kmers	CTACCTCTAATAACAAGCGAG	Kmer	EA722_RS05520	3.94 E-10	alkene_reductase
CRO	Kmers	AAACTCAAGACCAAGACTCTA	Kmer	EA686_00535	3.94 E-10	putative_pilus_assembly_protein_FilE
CRO	Kmers	ATTAATTACACATTTTATTGA	Kmer	EA702_RS14635	3.94 E-10	FAD-dependent_oxidoreductase
CRO	Kmers	GCAGTTTGTACATCTTCGGCC	Kmer	EA702_RS16455	3.94 E-10	cysteine_hydrolase
CRO	Kmers	AGGTTGGATCTTTTAGATAAA	Kmer	EA686_00215	3.94 E-10	alpha/beta_hydrolase
CRO	Kmers	CTTTAACATCTGCAAGATCAA	Kmer	EA686_08600	3.94 E-10	ATP-binding_protein
CRO	Kmers	ACGGCGTAAGCTTACACGTGC	Kmer	EA722_RS06795	3.94 E-10	CYTH_and_CHAD_domain-containing_protein
CRO	Kmers	AAAATTCAGGTTTATCCCAAG	Kmer	EA722_RS17025	3.94 E-10	DNA_mismatch_repair_endonuclease_MutL
CRO	Kmers	ACATGTTTACCTTGTAAAACG	Kmer	EA686_06000	3.94 E-10	UDP-N-acetylmuramate:L-alanyl-gamma-D-glutamyl-_meso-diaminopimelate_ligase
CRO	Kmers	GCTTCTTTGGTTAAATAAAAC	Kmer	EA686_04350	3.94 E-10	glucose_1-dehydrogenase
CRO	Kmers	GGTAATGCATGTTGCAACACC	Kmer	EA722_RS13570	3.94 E-10	MFS_transporter
CRO	Kmers	AGCTTACACGTGCCTGATGAA	Kmer	EA722_RS06795	3.94 E-10	CYTH_and_CHAD_domain-containing_protein
CRO	Kmers	CTGATGCAAAAGATATCCCGC	Kmer	EA686_06610	3.94 E-10	taurine_ABC_transporter_substrate-binding_protein
CRO	Kmers	CGCCAAGTTAGCGACCACCAA	Kmer	EA686_10495	3.94 E-10	alpha/beta_hydrolase
CRO	Kmers	CAAAACCAATGCCAGCAATTA	Kmer	EA686_03635	3.94 E-10	acyl-CoA_carboxylase_subunit_beta
CRO	Kmers	ATAACCAATTGATTTTAAATA	Kmer	EA722_RS03210	3.94 E-10	LTA_synthase_family_protein
CRO	Kmers	AACTTTTAAATGCTGAACAGA	Kmer	EA686_00535	3.94 E-10	putative_pilus_assembly_protein_FilE
CRO	Kmers	GAAGGATAAGATTTGCTTTTA	Kmer	EA686_00535	3.94 E-10	putative_pilus_assembly_protein_FilE
CRO	Kmers	AATCTAAATTTACAACTATTG	Kmer	EA686_00535	3.94 E-10	putative_pilus_assembly_protein_FilE
CRO	Kmers	AACATAGAACTTAACCAATGT	Kmer	EA686_19205	3.94 E-10	glycosyltransferase_family_39_protein
CRO	Kmers	TCCTCCACCACAACCATTTAA	Kmer	EA686_00540	3.94 E-10	protein_FilF
CRO	Kmers	ACGAGCAAGATTTAATTGCTC	Kmer	EA702_RS06825	3.94 E-10	aldehyde_dehydrogenase
CRO	Kmers	ACTTTGGTGTTGACCACGTTC	Kmer	EA686_00570	3.94 E-10	peptide_chain_release_factor_3
CRO	Kmers	ACATAGAACTTAACCAATGTA	Kmer	EA686_19205	3.94 E-10	glycosyltransferase_family_39_protein
CRO	Kmers	CTTTTCATACTTATGTCCCTA	Kmer	EA702_RS06385	3.94 E-10	LTA_synthase_family_protein
CRO	Kmers	TACTTTCTTTGCGTACAGCAA	Kmer	EA702_RS06385	3.94 E-10	LTA_synthase_family_protein
CRO	Kmers	ACACGTATCCAGGCTGTACAG	Kmer	EA702_RS03205	3.94 E-10	transcription_termination/antitermination_protein_NusA
CRO	Kmers	AGTTAAAAATGCTGTTGGTGA	Kmer	EA686_04220	3.94 E-10	type_I_secretion_protein
CRO	Kmers	CAGAACCAAGCTTTGTCGGAA	Kmer	EA722_RS06550	3.94 E-10	GntR_family_transcriptional_regulator
CRO	Kmers	ACGAGTAACACCAGGCGCGAT	Kmer	EA686_22270	3.94 E-10	amino_acid_ABC_transporter_permease
CRO	Kmers	AAAAGTACCGCCTTCAGCACA	Kmer	EA686_00535	3.94 E-10	putative_pilus_assembly_protein_FilE
CRO	Kmers	ACCATTAGAAGTTCGTATGGG	Kmer	EA686_09495	3.94 E-10	50S_ribosomal_protein_L16
CRO	Kmers	AGTAACGGCATAGGCTCGTTA	Kmer	EA702_RS08770	3.94 E-10	cytochrome_ubiquinol_oxidase_subunit_I
CRO	Kmers	AAAAACAAGCGCCTGTAGGGT	Kmer	EA702_RS06385	3.94 E-10	LTA_synthase_family_protein
CRO	Kmers	CACAGATGATCTTATTTTTGA	Kmer	EA702_RS06385	3.94 E-10	LTA_synthase_family_protein
CRO	Kmers	ACGTGCCTGATGAATGTGCTC	Kmer	EA722_RS06795	3.94 E-10	CYTH_and_CHAD_domain-containing_protein
CRO	Kmers	AAATTTATATCACTTGAAAAT	Kmer	EA702_RS06385	3.94 E-10	LTA_synthase_family_protein
CRO	Kmers	GCTTCTAGCTCTTGTGAAGAC	Kmer	EA686_00535	3.94 E-10	putative_pilus_assembly_protein_FilE
CRO	Kmers	CAAGTAATTCGTTTTCATCTA	Kmer	EA670_RS10320	3.94 E-10	aldehyde_dehydrogenase_(NADP(+))
CRO	Kmers	ATGAATCTAACTTGGCATAAG	Kmer	EA686_04920	3.94 E-10	capsule_assembly_Wzi_family_protein
CRO	Kmers	TGTCTAAAACCGCGGCAGAAA	Kmer	EA686_04885	3.94 E-10	LysR_family_transcriptional_regulator
CRO	Kmers	AAAAATTTTATGGCCTTTTGC	Kmer	EA686_00540	3.94 E-10	protein_FilF
CRO	Kmers	CCTAAACGAGCACTTTCACTA	Kmer	EA722_RS11160	3.94 E-10	UDP-N-acetylmuramate:L-alanyl-gamma-D-glutamyl-_meso-diaminopimelate_ligase
CRO	Kmers	AGGCGTTGTACTGGCCTTCAG	Kmer	EA686_16395	3.94 E-10	hypothetical_protein
CRO	Kmers	ATTAAAACCGGTTCACCACGA	Kmer	EA722_RS04430	3.94 E-10	alpha/beta_hydrolase
CRO	Kmers	ATTCTTTTAAAAATAAAAAAG	Kmer	EA686_16535	3.94 E-10	CapA_family_protein
CRO	Kmers	AAGAAAGTAAAGCGACTTTTC	Kmer	EA702_RS06385	3.94 E-10	LTA_synthase_family_protein
CRO	Kmers	ATGCTCCTAATGCTGCAAGCA	Kmer	EA686_16455	3.94 E-10	prepilin_peptidase
CRO	Kmers	GATACGATCCATTGCACGTGC	Kmer	EA702_RS10310	3.94 E-10	citrate_(Si)-synthase
CRO	Kmers	CTATCAGGCGCGTCGCCGCGA	Kmer	EA722_RS03590	3.94 E-10	chromosome_segregation_protein_SMC
CRO	Kmers	TAGGTGTCCCGCTTTTTGAAA	Kmer	EA702_RS01845	3.94 E-10	amino_acid_permease
CRO	Kmers	AAGCTCTCTCTCAGAGCCATT	Kmer	EA722_RS06415	3.94 E-10	cache_protein
CRO	Kmers	ATCGATTCAAGGAGTTTTAAA	Kmer	EA686_00535	3.94 E-10	putative_pilus_assembly_protein_FilE
CRO	Kmers	ATCAATTATTAGCTAATTTTA	Kmer	EA673_RS19770	3.94 E-10	hypothetical_protein
CRO	Kmers	ATGGGCACTTTATGCCGAGCA	Kmer	EA722_RS17835	3.94 E-10	DUF885_domain-containing_protein
CRO	Kmers	AATGACATCGTAGGTTTCAGC	Kmer	EA686_28060	3.94 E-10	copper_oxidase
CRO	Kmers	CACAGTAAGTAAAGAAAAGCC	Kmer	EA686_26715	3.94 E-10	NCS1_family_nucleobase:cation_symporter-1
CRO	Kmers	AAGTACTTATACTGCTGGAAC	Kmer	EA702_RS06385	3.94 E-10	LTA_synthase_family_protein
CRO	Kmers	CTACAGTAAGTAAAGAAAAGC	Kmer	EA722_RS16115	3.94 E-10	NCS1_family_nucleobase:cation_symporter-1
CRO	Kmers	AAGGAATGGCTTCTTTAGTTA	Kmer	EA722_RS17960	3.94 E-10	glucose_1-dehydrogenase
CRO	Kmers	CCTTTATCGAGTAAGCGATGC	Kmer	EA722_RS16665	3.94 E-10	divalent_metal_cation_transporter
CRO	Kmers	AAAAAGCCAAACCATGTGTCC	Kmer	EA702_RS01610	3.94 E-10	type_II_toxin-antitoxin_system_HipA_family_toxin
CRO	Kmers	AATGAATAATAATTAAAAAAA	Kmer	EA686_09415	3.94 E-10	hypothetical_protein
CRO	Kmers	ACTCGGTAATCACTCGCCAAA	Kmer	EA722_RS07740	3.94 E-10	nicotinate_phosphoribosyltransferase
CRO	Kmers	ACTTATGGCCACGGAAGCCAT	Kmer	EA686_00535	3.94 E-10	putative_pilus_assembly_protein_FilE
CRO	Kmers	GAAGGATTTAACTGTACCAAC	Kmer	EA686_00535	3.94 E-10	putative_pilus_assembly_protein_FilE
CRO	Kmers	ATTAGATGTGCTTCCGGCTAG	Kmer	EA686_01130	3.94 E-10	ParA_family_protein
CRO	Kmers	GGGTTTTCTTGTTTTGCTTTA	Kmer	EA702_RS08455	3.94 E-10	fumarate_reductase/succinate_dehydrogenase_flavoprotein_subunit
CRO	Kmers	AGATAAAACGTCTATGCCCTG	Kmer	EA702_RS11660	3.94 E-10	UDP-N-acetylmuramate_dehydrogenase
CRO	Kmers	CGATGTCATTATTAAAAATAC	Kmer	EA722_RS10420	3.94 E-10	nitroreductase_family_protein
CRO	Kmers	ACTGGTTGCTATGCTAATGAA	Kmer	EA722_RS14235	3.94 E-10	hypothetical_protein
CRO	Kmers	CTTCTTTAGTTAAATAAAACA	Kmer	EA722_RS17960	3.94 E-10	glucose_1-dehydrogenase
CRO	Kmers	AAGTCGACTTTTCTATTCAAA	Kmer	EA686_07790	3.94 E-10	enoyl-CoA_hydratase
CRO	Kmers	TGTTTTTAGCGCTCAATTTAA	Kmer	EA733_RS17255	3.94 E-10	TetR/AcrR_family_transcriptional_regulator
CRO	Kmers	AGGCTAAACTCGAAAAGATAG	Kmer	#N/A	3.94 E-10	intergenic
CRO	Kmers	GTAGGGTAGCTAAATGAATAA	Kmer	EA686_13320	3.94 E-10	hypothetical_protein
CRO	Kmers	GGCGAGTGATTACCGAGTTTA	Kmer	EA722_RS07740	3.94 E-10	nicotinate_phosphoribosyltransferase
CRO	Kmers	ACTTTGCCTTACCGTAATCAC	Kmer	EA702_RS08920	3.94 E-10	LysE_family_translocator
CRO	Kmers	CTCTTACCACAATTGCATTGA	Kmer	EA686_00540	3.94 E-10	protein_FilF
CRO	Kmers	AACTGAACTTAACATTTAAAT	Kmer	EA686_14625	3.94 E-10	OsmC_family_peroxiredoxin
CRO	Kmers	ATCATATTTTCAAGTGATATA	Kmer	EA702_RS06385	3.94 E-10	LTA_synthase_family_protein
CRO	Kmers	AAATCTAACACCGTGTCATGT	Kmer	EA686_00345	3.94 E-10	type_I_secretion_C-terminal_target_domain-containing_protein
CRO	Kmers	AATAACCTGACACGTTACCAG	Kmer	EA686_04220	3.94 E-10	type_I_secretion_protein
CRO	Kmers	GTTGAAAGGTGCAGCTCATAA	Kmer	EA686_10060	3.94 E-10	methyltransferase
CRO	Kmers	CTAAATGTTGCTTAGGTTTAC	Kmer	EA722_RS19575	3.94 E-10	PLD-like_domain_protein
CRO	Kmers	AGCAACCAGTGGCAATAAAAC	Kmer	EA722_RS14235	3.94 E-10	hypothetical_protein
CRO	Kmers	TTACTGTCGAAAATCATCCAA	Kmer	EA702_RS06385	3.94 E-10	LTA_synthase_family_protein
CRO	Kmers	AGCCAAAGTTTATTTATGCGA	Kmer	EA702_RS06385	3.94 E-10	LTA_synthase_family_protein
CRO	Kmers	ACAAAAGATAATAAATCTTTA	Kmer	EA702_RS06385	3.94 E-10	LTA_synthase_family_protein
CRO	Kmers	AAAAAAATTTTATGGCCTTTT	Kmer	EA686_00540	3.94 E-10	protein_FilF
CRO	Kmers	CGATTACTGAAGACAATACAA	Kmer	EA686_27440	3.94 E-10	hypothetical_protein
CRO	Kmers	CATGGTCTTTTCACCTTGGCG	Kmer	EA686_10830	3.94 E-10	triphosphoribosyl-dephospho-CoA_synthase
CRO	Kmers	TATGTAAATCGATGCGGTCAA	Kmer	EA722_RS02735	3.94 E-10	ATP-dependent_protease
CRO	Kmers	ATGCATGCTATGTGTTAAAGC	Kmer	EA702_RS08490	3.94 E-10	hypothetical_protein
CRO	Kmers	TCTAACACCGTGTCATGTCCA	Kmer	EA686_00345	3.94 E-10	type_I_secretion_C-terminal_target_domain-containing_protein
CRO	Kmers	ATAATAAATCTTTAGGTAATC	Kmer	EA702_RS06385	3.94 E-10	LTA_synthase_family_protein
CRO	Kmers	CGTACTAGTTTTATAAGAGCC	Kmer	EA686_00370	3.94 E-10	glycerophosphodiester_phosphodiesterase
CRO	Kmers	AAAAGCGCCAAAAATTTTCTT	Kmer	EA686_21330	3.94 E-10	DedA_family_protein
CRO	Kmers	GTCTGATTTCCCGCCTTGAAC	Kmer	EA686_06405	3.94 E-10	magnesium-translocating_P-type_ATPase
CRO	Kmers	CACCACCAATAAATGAGAAAG	Kmer	EA686_03880	3.94 E-10	hypothetical_protein
CRO	Kmers	CATTAATTGTCGAACTTCCTC	Kmer	EA686_00540	3.94 E-10	protein_FilF
CRO	Kmers	ATCAGGTTTACTTAAAAGGTG	Kmer	EA686_00345	3.94 E-10	type_I_secretion_C-terminal_target_domain-containing_protein
CRO	Kmers	TGGCCCAATAATTGTATAAAA	Kmer	EA686_00535	3.94 E-10	putative_pilus_assembly_protein_FilE
CRO	Kmers	CTCAAGCAAACATTCCTGTTC	Kmer	EA686_07915	3.94 E-10	exonuclease_V_subunit_amma
CRO	Kmers	CAATTACCGAAAAACCATTAG	Kmer	EA686_09495	3.94 E-10	50S_ribosomal_protein_L16
CRO	Kmers	TGAAGCTCATTGAAGGTACAA	Kmer	EA702_RS01610	3.94 E-10	type_II_toxin-antitoxin_system_HipA_family_toxin
CRO	Kmers	AAAGATAATTCAATAAAATGT	Kmer	EA722_RS07490	3.94 E-10	hypothetical_protein
CRO	Kmers	AGCAGAAGCAAATACTCAAAT	Kmer	EA686_04220	3.94 E-10	type_I_secretion_protein
CRO	Kmers	CTTTTCAATCGACAAACTCAA	Kmer	EA686_00535	3.94 E-10	putative_pilus_assembly_protein_FilE
CRO	Kmers	CATCAATGCAATTGTGGTAAG	Kmer	EA686_00540	3.94 E-10	protein_FilF
CRO	Kmers	CCAAGAAAATTCCCCATTTTA	Kmer	EA722_RS16115	3.94 E-10	NCS1_family_nucleobase:cation_symporter-1
CRO	Kmers	ATGGACATGACACGGTGTTAG	Kmer	EA686_00345	3.94 E-10	type_I_secretion_C-terminal_target_domain-containing_protein
CRO	Kmers	ACATATTGATGTTCAAGGCGG	Kmer	EA686_06405	3.94 E-10	magnesium-translocating_P-type_ATPase
CRO	Kmers	ATTCATCAGGCACGCGTAAGC	Kmer	EA686_01350	3.94 E-10	CHAD_domain-containing_protein
CRO	Kmers	TACCTTGCATGAAGAAACTAA	Kmer	EA686_04090	3.94 E-10	ABC_transporter_substrate-binding_protein
CRO	Kmers	TAACACATAGCATGCATGCGA	Kmer	EA702_RS08490	3.94 E-10	hypothetical_protein
CRO	Kmers	CCATCAATAGTTGTAAATTTA	Kmer	EA686_00535	3.94 E-10	putative_pilus_assembly_protein_FilE
CRO	Kmers	AGCACTGCGTGAAGACCCAGA	Kmer	EA702_RS12675	3.94 E-10	type_IV_pilus_twitching_motility_protein_PilT
CRO	Kmers	GCAAGACGTTTCTCAATTTCA	Kmer	EA702_RS15935	3.94 E-10	Lon_protease
CRO	Kmers	AAAATCCAACGTGTAATTTTG	Kmer	EA702_RS06385	3.94 E-10	LTA_synthase_family_protein
CRO	Kmers	CAGCGATAATATCTTGTTTAA	Kmer	EA686_18045	3.94 E-10	adenosine_deaminase
CRO	Kmers	AATATCTTCTGGACTTAAATT	Kmer	EA702_RS06385	3.94 E-10	LTA_synthase_family_protein
CRO	Kmers	CTAGCGCAGCTGCAATCATGA	Kmer	EA702_RS14850	3.94 E-10	ABC_transporter_ATP-binding_protein
CRO	Kmers	CTGTTATTTATCTTTATTGCC	Kmer	EA717_RS13195	3.94 E-10	hypothetical_protein
CRO	Kmers	GATTTGAGAAATTTATATCAC	Kmer	EA702_RS06385	3.94 E-10	LTA_synthase_family_protein
CRO	Kmers	CTAAACTCGAAAAGATAGTCA	Kmer	EA722_RS18070	3.94 E-10	hypothetical_protein
CRO	Kmers	AAGGTTAGGGTAGAAAAGCCC	Kmer	EA686_15215	3.94 E-10	DUF4184_family_protein
CRO	Kmers	AGGTGCGCATCGCTTACTCGA	Kmer	EA722_RS16665	3.94 E-10	divalent_metal_cation_transporter
CRO	Kmers	GTTTCGTATTGGTACAGCTGA	Kmer	EA686_28060	3.94 E-10	copper_oxidase
CRO	Kmers	CAACAAATTGATAGTAATCTG	Kmer	EA702_RS06385	3.94 E-10	LTA_synthase_family_protein
CRO	Kmers	AAGCTTACGCGTGCCTGATGA	Kmer	EA686_01350	3.94 E-10	CHAD_domain-containing_protein
CRO	Kmers	AAATTTCTCAAATCCTAACTC	Kmer	EA702_RS06385	3.94 E-10	LTA_synthase_family_protein
CRO	Kmers	AAATGAATAAAAAAATTTTAT	Kmer	EA686_00540	3.94 E-10	protein_FilF
CRO	Kmers	ACTGAACAAACTTAGCCTCAA	Kmer	EA702_RS05700	3.94 E-10	tail_protein
CRO	Kmers	AGAGCTAACTTTGCAAGAAAG	Kmer	EA708_RS07420	3.94 E-10	long-chain-fatty-acid--CoA_ligase
CRO	Kmers	ATTTAATCAAGGGGGCTGGGC	Kmer	EA702_RS06385	3.94 E-10	LTA_synthase_family_protein
CRO	Kmers	CTAAATGATGAGAGTCCCAAA	Kmer	EA722_RS03210	3.94 E-10	LTA_synthase_family_protein
CRO	Kmers	TCGGAGTAACATATTTAATCA	Kmer	EA702_RS06385	3.94 E-10	LTA_synthase_family_protein
CRO	Kmers	AATATCTGGGTCTTCACGCAG	Kmer	EA702_RS12675	3.94 E-10	type_IV_pilus_twitching_motility_protein_PilT
CRO	Kmers	ATGATTCGAATGGCTTCTAAA	Kmer	EA722_RS15320	3.94 E-10	amino_acid_ABC_transporter_permease
CRO	Kmers	ATAACAGGCAAGTCGGGGTGA	Kmer	EA686_20740	3.94 E-10	nitrogen_regulation_protein_NR(I)
CRO	Kmers	TTATACTGCATCTATTGACAA	Kmer	EA686_16340	3.94 E-10	uracil_phosphoribosyltransferase
CRO	Kmers	GAATAAAAAAATTTTATGGCC	Kmer	EA686_00540	3.94 E-10	protein_FilF
CRO	Kmers	AGGTGTAAACGGATATAACCC	Kmer	EA686_03980	3.94 E-10	heme-binding_protein
CRO	Kmers	TCATTGGCTTGAGCAATTAAA	Kmer	EA702_RS06825	3.94 E-10	aldehyde_dehydrogenase
CRO	Kmers	ATCCGAATATTATTATTGTTA	Kmer	EA702_RS06385	3.94 E-10	LTA_synthase_family_protein
CRO	Kmers	GTACACTTTGCCTTACCGTAA	Kmer	EA702_RS08920	3.94 E-10	LysE_family_translocator
CRO	Kmers	AATTTGGGAAGGCTTTACTCA	Kmer	EA722_RS06130	3.94 E-10	AEC_family_transporter
CRO	Kmers	ATGCCGAAAACCGTACTAGCG	Kmer	EA686_24895	3.94 E-10	DUF1852_family_protein
CRO	Kmers	GATATCTTTTGCATCGGAACC	Kmer	EA722_RS16140	3.94 E-10	taurine_ABC_transporter_substrate-binding_protein
CRO	Kmers	ATACGCCAAGCTTTGCGATAG	Kmer	EA722_RS01605	3.94 E-10	aldehyde_dehydrogenase
CRO	Kmers	CGGTGTTAGATTTTACTTTAG	Kmer	EA686_00345	3.94 E-10	type_I_secretion_C-terminal_target_domain-containing_protein
CRO	Kmers	ACTATCTTTTCCAGTTGAGCC	Kmer	EA687_RS08400	3.94 E-10	ComF_family_protein
CRO	Kmers	CAAAGATGCGACTAAAGCAAG	Kmer	EA722_RS00040	3.94 E-10	AdeC/AdeK/OprM_family_multidrug_efflux_complex_outer_membrane_factor
CRO	Kmers	AGCACGACGAGCATAATGACC	Kmer	EA686_00985	3.94 E-10	tRNA_2-thiouridine(34)_synthase_MnmA
CRO	Kmers	CCTTGTAGTTCCGGGAACTCA	Kmer	EA722_RS02030	3.94 E-10	glycine--tRNA_ligase_subunit_beta
CRO	Kmers	GTAGTGGTTTAATTTACTTAA	Kmer	EA702_RS06385	3.94 E-10	LTA_synthase_family_protein
CRO	Kmers	ATCATGGTCTTTTCACCTTGG	Kmer	EA686_10830	3.94 E-10	triphosphoribosyl-dephospho-CoA_synthase
CRO	Kmers	ACCTGATTTAGAGTATTTAAG	Kmer	EA686_11975	3.94 E-10	hypothetical_protein
CRO	Kmers	CATGCTCCTAATGCTGCAAGC	Kmer	EA686_16455	3.94 E-10	prepilin_peptidase
CRO	Kmers	CAAAATAATATCTGGGTCTTC	Kmer	EA722_RS07050	3.94 E-10	type_IV_pilus_twitching_motility_protein_PilT
CRO	Kmers	GTTTGTACATCTTCGGCCTTA	Kmer	EA702_RS16455	3.94 E-10	cysteine_hydrolase
CRO	Kmers	ACAACTGCTATATATTTGAAT	Kmer	#N/A	3.94 E-10	intergenic
CRO	Kmers	AACCAATACGCGATAAAAATG	Kmer	EA702_RS05100	3.94 E-10	long-chain-acyl-CoA_synthetase
CRO	Kmers	TGAATACGACTTTTTTCCCAA	Kmer	EA702_RS06385	3.94 E-10	LTA_synthase_family_protein
CRO	Kmers	ACGTTTCTAAAGTATTGGATA	Kmer	EA702_RS06385	3.94 E-10	LTA_synthase_family_protein
CRO	Kmers	GCTTCTCATTACTAGAAGCAA	Kmer	EA686_00535	3.94 E-10	putative_pilus_assembly_protein_FilE
CRO	Kmers	CAGGTGCGCATCGCTTACTCG	Kmer	EA722_RS16665	3.94 E-10	divalent_metal_cation_transporter
CRO	Kmers	AGGAATTCCCGAATACCAGAA	Kmer	EA702_RS06385	3.94 E-10	LTA_synthase_family_protein
CRO	Kmers	ACCTGAAGGTGTAAACGGATA	Kmer	EA686_03980	3.94 E-10	heme-binding_protein
CRO	Kmers	CTTAATGGCTGAGCTGCATCA	Kmer	EA722_RS14620	3.94 E-10	alpha/beta_fold_hydrolase
CRO	Kmers	ATCTTATTTTTGATTCGATTA	Kmer	EA702_RS06385	3.94 E-10	LTA_synthase_family_protein
CRO	Kmers	CGTATCCAAGCGGTACAGCAA	Kmer	EA686_00475	3.94 E-10	transcription_termination/antitermination_protein_NusA
CRO	Kmers	CCCAGCAATTACACCACCACC	Kmer	EA722_RS14405	3.94 E-10	acetyl-CoA_carboxylase
[truncated: 348 more rows]
