# Supplementary material for: Bacterial Genome Wide Association Studies (bGWAS) and Transcriptomics Identifies Cryptic Antimicrobial Resistance Mechanisms in Acinetobacter baumannii
Source: Front Public Health. 2020 Sep 2;8:451. doi: 10.3389/fpubh.2020.00451 (PMC7493718; doi:10.3389/fpubh.2020.00451)
Supplement: Table S7 — DESeq2 results of Pair 1 RNA-Seq datasets. Biological replicates denoted with (a,b,c). Isolates grown in sub-inhibitory concentrations are labeled as “sub” with the corresponding antimicrobial. [file Table_7.xlsx]

## Sheet: pair1_salmon
Table S7: DESeq2 results of Pair 1 RNA-Seq datasets. Biological replicates denoted with (a,b,c). Isolates grown in sub-inhibitory concentrations are labeled as "sub" with the corresponding antimicrobial.
	baseMean	log2FoldChange	lfcSE	stat	pvalue	padj	TG22182a	TG22182b	TG22182-subCROc	TG22182-subCROa	TG22182-subCAZa	TG22182-subCROb	TG22182-subCAZb	TG22182-subCROc	TG22182-subCAZc	TG22627-subCROa	TG22627-subCROb	TG22627-subCROc
EA674_03600|multidrug_efflux_RND_transporter_permease_subunit_AdeJ	4836.43	-3.19022	0.0764329	-41.7389	0	0	2061	1689	1651	2042	1069	1594	1382	1009	1747	18168	16378	16790
EA674_03605|multidrug_efflux_RND_transporter_periplasmic_adaptor_subunit_AdeI	1988.66	-3.42144	0.0876315	-39.0435	0	0	731	614	609	803	408	563	464	392	674	7711	6950	7165
EA674_08405|glutathione_S-transferase_family_protein	2612.98	3.51903	0.0825637	42.622	0	0	4459	3607	3432	4256	2248	3562	2638	2439	3336	305	345	396
EA674_11290|hypothetical_protein	863.384	-4.73731	0.113378	-41.7832	0	0	146	118	127	159	81	117	139	94	139	3379	3527	3972
EA714_004470|hypothetical_protein	2634.83	3.33963	0.0835287	39.9818	0	0	4710	3337	3327	4318	2173	3434	2760	2466	3685	332	402	430
EA714_005605|TonB-dependent_siderophore_receptor	5791.61	9.96055	0.286558	34.7593	1.00356e-264	8.78113e-262	9828	7828	8104	9587	5166	7551	6734	5263	8061	12	9	6
EA714_008075|PER_family_class_A_extended-spectrum_beta-lactamase	4327.14	9.98221	0.328523	30.3851	8.63098e-203	6.47324e-200	7749	6066	5657	7603	3667	5994	4641	4241	5582	6	3	11
EA674_03595|multidrug_efflux_RND_transporter_outer_membrane_channel_subunit_AdeK	1748.86	-2.58183	0.0855879	-30.1659	6.64443e-200	4.36041e-197	1054	823	771	968	470	803	669	547	839	5837	5382	5203
EA674_03610|phosphatase_PAP2_family_protein	404.468	-3.49166	0.118187	-29.5435	7.9572e-192	4.6417e-189	160	108	118	135	75	104	92	91	136	1450	1468	1584
EA674_12405|hypothetical_protein	388.226	-2.69775	0.110655	-24.3797	2.8056e-131	1.47294e-128	219	156	166	216	140	147	177	105	200	1231	1178	1231
EA674_11070|OXA-51_family_carbapenem-hydrolyzing_class_D_beta-lactamase	3529.48	-2.04658	0.0887157	-23.069	9.47696e-118	4.5231e-115	3038	1884	1883	2946	994	2338	1235	1750	1884	9213	9485	10157
EA674_09735|multidrug_efflux_RND_transporter_permease_subunit_AdeB	397.064	-3.19147	0.141233	-22.5972	4.61647e-113	2.0197e-110	163	139	139	199	74	166	96	80	146	1597	1338	1255
EA674_03810|Ig-like_domain-containing_protein	1397.84	-1.88152	0.0909332	-20.6913	4.15252e-95	1.67698e-92	1171	864	771	1128	447	1005	681	701	881	3407	3686	3580
EA714_004460|hypothetical_protein	1203.57	1.94186	0.0989821	19.6183	1.07952e-85	4.04822e-83	1952	1407	1679	1815	894	1553	1184	1077	1520	433	429	509
EA674_13125|adenosine_deaminase	273.358	5.2273	0.267863	19.5149	8.20957e-85	2.87335e-82	499	390	340	482	234	364	270	251	393	13	7	14
EA674_12400|type_VI_secretion_system_contractile_sheath_small_subunit	377.313	-2.23122	0.114975	-19.4062	6.84063e-84	2.24458e-81	288	184	195	258	138	165	198	131	198	1066	1055	1113
EA674_06845|aspartate-alanine_antiporter	404.922	-2.08286	0.107878	-19.3076	4.6381e-83	1.43236e-80	285	236	234	277	147	210	195	154	259	973	1149	1216
EA674_09730|multidrug_efflux_RND_transporter_periplasmic_adaptor_subunit_AdeA	161.052	-3.20142	0.172288	-18.5818	4.50772e-77	1.31475e-74	70	65	51	59	28	45	34	24	51	646	601	526
CP039993_1725636_1725709	564.721	7.98286	0.445794	17.9071	1.03856e-71	2.8697e-69	1072	822	786	918	542	787	564	517	657	2	5	4
EA674_12395|type_VI_secretion_system_contractile_sheath_large_subunit	531.728	-1.71851	0.10517	-16.3404	5.0937e-60	1.3371e-57	449	372	324	455	242	321	319	206	326	1324	1335	1248
EA674_13930|isocitrate_lyase	5332.67	-1.5153	0.0945247	-16.0308	7.79162e-58	1.9479e-55	4893	3527	3202	4856	2490	4519	3091	2885	4852	9923	11750	12661
EA674_12565|type_VI_secretion_system_tip_protein_VgrG	142.628	-2.76599	0.174611	-15.8408	1.62671e-56	3.88193e-54	84	56	54	89	45	59	66	26	72	490	418	454
EA674_18610|CoA-acylating_methylmalonate-semialdehyde_dehydrogenase	2638.4	-1.2026	0.0784949	-15.3208	5.55679e-53	1.2684e-50	2646	2036	1934	2881	1089	2284	1541	1543	2204	5194	5131	5480
EA674_15280|hypothetical_protein	2252.15	-1.13273	0.0752744	-15.048	3.55951e-51	7.78643e-49	2235	1822	1831	2046	1117	1770	1482	1211	1792	4302	4269	4924
EA674_06840|bifunctional_aspartate_transaminase/aspartate_4-decarboxylase	748.257	-1.66072	0.111746	-14.8616	5.8474e-50	1.22795e-47	539	544	541	550	353	411	521	268	532	1735	1707	1981
EA674_11075|N-acetyltransferase_family_protein	216.676	-1.84455	0.128637	-14.3392	1.24556e-46	2.51508e-44	192	126	117	205	85	159	91	117	133	496	525	592
EA674_06055|hypothetical_protein	2346.03	0.929129	0.0663891	13.9952	1.66742e-44	3.24221e-42	3835	2949	2723	3264	1739	2621	2031	1774	2601	1768	1611	1797
EA674_12540|divalent_metal_cation_transporter	395.157	-2.00522	0.144239	-13.9021	6.15045e-44	1.15321e-41	335	194	213	361	114	304	121	235	268	1051	1001	1005
EA674_15550|methionine_synthase	346.646	1.69215	0.122585	13.8039	2.41485e-43	4.37172e-41	549	503	431	528	298	401	343	238	416	167	145	167
CP039993_3545370_3546086	9425.06	-1.28582	0.0934603	-13.7579	4.5657e-43	7.98998e-41	9301	6780	7571	8039	4567	6648	6319	4719	6950	21798	17207	21088
EA674_09740|multidrug_efflux_RND_transporter_outer_membrane_channel_subunit_AdeC	82.747	-2.88372	0.212904	-13.5447	8.51373e-42	1.44184e-39	34	33	38	50	17	32	28	30	37	274	264	273
EA674_00940|carbapenem_susceptibility_porin_CarO	2375.5	1.30456	0.0966911	13.492	1.74294e-41	2.8595e-39	3699	3209	2604	3668	2059	2692	2203	1930	2612	1484	1205	1306
EA674_02720|HAMP_domain-containing_histidine_kinase	712.463	-1.12343	0.0837784	-13.4095	5.32135e-41	8.46579e-39	740	586	552	739	336	584	439	370	561	1302	1459	1492
EA674_07675|iron-containing_redox_enzyme_family_protein	130.702	-2.28471	0.172042	-13.2799	3.02689e-40	4.67388e-38	79	83	63	81	39	83	39	56	67	331	394	421
CP039993_1724351_1724709	716.905	9.67383	0.728941	13.2711	3.40724e-40	5.11086e-38	1192	1082	864	1311	648	943	816	751	810	1	3	0
EA674_12530|putative_hydro-lyase	186.301	-2.08106	0.159176	-13.0739	4.64112e-39	6.7683e-37	156	88	93	165	50	152	70	96	126	526	456	481
EA674_11230|amino_acid_ABC_transporter_substrate-binding_protein	934.052	-1.17135	0.0913485	-12.8228	1.22141e-37	1.73172e-35	1047	723	633	1070	380	822	491	624	687	1694	1960	1913
EA674_03815|Biofilm_associated_protein	470.556	-1.69675	0.132343	-12.8208	1.25344e-37	1.73172e-35	409	297	345	331	168	317	255	178	311	1390	1074	1076
EA674_18605|3-hydroxyisobutyrate_dehydrogenase	1083.05	-1.04304	0.0822339	-12.6838	7.26918e-37	9.78543e-35	1205	875	821	1218	486	1015	603	650	862	1873	2152	2159
EA674_12520|ATP-grasp_domain-containing_protein	202.058	-1.88024	0.148489	-12.6625	9.54254e-37	1.25246e-34	207	122	103	173	52	118	74	103	108	567	536	520
CP039993_2862076_2862664	807.485	-1.3531	0.107492	-12.5879	2.46238e-36	3.15305e-34	733	579	529	734	362	676	524	529	745	1479	1615	1795
EA674_12390|type_VI_secretion_system_tube_protein_Hcp	564.989	-1.22552	0.0976964	-12.5441	4.28149e-36	5.35187e-34	652	410	405	559	265	434	343	261	453	1182	1129	1217
EA674_12535|LamB/YcsF_family_protein	254.149	-2.01117	0.162191	-12.4	2.61422e-35	3.19178e-33	199	134	143	243	76	202	64	140	169	740	636	604
EA674_09685|PAAR_domain-containing_protein	80.1834	-2.69864	0.218443	-12.354	4.63631e-35	5.53196e-33	49	39	26	34	40	30	26	19	39	269	243	251
EA674_13220|type_VI_secretion_system_tip_protein_VgrG	101.817	-2.26678	0.184421	-12.2913	1.00814e-34	1.17616e-32	73	46	52	64	40	48	59	34	71	238	302	313
EA674_18600|AMP-binding_protein	946.627	-1.01455	0.0856608	-11.8438	2.31812e-32	2.64568e-30	1142	758	684	1073	434	825	528	621	725	1706	1796	1863
EA674_11860|indolepyruvate_ferredoxin_oxidoreductase_family_protein	2090.89	-1.43129	0.121314	-11.7982	3.9868e-32	4.45334e-30	2340	1482	1283	2223	659	1566	970	1225	1564	4038	4985	5047
EA674_00910|hypothetical_protein	1071.78	-1.14962	0.0990372	-11.608	3.75268e-31	4.10449e-29	1046	826	852	963	573	812	772	653	797	2161	2010	2127
EA674_15555|DUF1852_domain-containing_protein	373.915	1.36206	0.119056	11.4405	2.62457e-30	2.81204e-28	528	500	428	597	298	426	402	274	467	179	189	225
CP039993_2711599_2711710	91.557	4.93186	0.436932	11.2875	1.51293e-29	1.58858e-27	170	164	107	153	96	127	104	31	135	5	4	6
CP039993_946280_946574	244.418	1.5722	0.143345	10.9679	5.44966e-28	5.51975e-26	362	307	343	366	177	295	230	201	313	100	111	147
EA674_05240|aldehyde_dehydrogenase_family_protein	3012.84	-0.75776	0.0690904	-10.9677	5.46718e-28	5.51975e-26	3513	2633	2480	3539	1446	2976	1871	2110	2579	4866	5037	5205
EA674_06050|hypothetical_protein	3525.44	0.874152	0.0806484	10.839	2.24824e-27	2.22703e-25	5559	4097	3539	5034	2474	4174	3316	3078	4209	2177	2547	2708
EA674_00355|fumarylacetoacetase	253.832	-1.38341	0.129312	-10.6982	1.03745e-26	1.00863e-24	233	190	165	271	105	214	165	121	222	538	550	501
EA674_11000|trifunctional_transcriptional_regulator/proline_dehydrogenase/L-glutamate_gamma-semialdehyde_dehydrogenase	7249.84	-0.689835	0.0645937	-10.6796	1.26806e-26	1.21042e-24	8600	6374	6160	8592	3754	6754	5076	4496	6778	11595	11695	12022
EA674_12525|5-oxoprolinase/urea_amidolyase_family_protein	182.211	-1.95715	0.18378	-10.6494	1.75405e-26	1.64442e-24	166	107	83	170	47	143	48	109	124	534	450	425
EA674_00590|type_VI_secretion_system_tip_protein_VgrG	45.4435	-3.55503	0.336582	-10.5622	4.4625e-26	4.1102e-24	19	19	5	28	4	6	12	6	11	171	178	170
CP039993_2286476_2286554	390.24	-1.6175	0.155598	-10.3954	2.60257e-25	2.35577e-23	427	258	216	370	154	286	131	210	258	701	1049	1075
CP039993_3844749_3844914	460.202	-1.05422	0.101549	-10.3814	3.01289e-25	2.68096e-23	469	333	338	557	236	397	289	334	428	802	797	854
EA674_05690|DUF3015_domain-containing_protein	407.669	-1.21197	0.117039	-10.3553	3.96112e-25	3.46598e-23	379	360	306	395	236	265	259	201	284	902	796	828
EA674_06900|dicarboxylate/amino_acid:cation_symporter	411.026	1.2826	0.124513	10.301	6.97672e-25	6.00456e-23	743	501	519	579	345	395	466	237	472	266	222	261
EA674_13195|aminoglycoside_O-phosphotransferase_APH(3')-Ia	512.58	12.1664	1.18136	10.2986	7.14798e-25	6.05273e-23	1050	738	673	941	386	702	513	473	686	0	0	0
CP039993_2287379_2287447	200.156	-1.667	0.162249	-10.2744	9.19536e-25	7.6628e-23	211	123	131	190	47	174	64	84	125	434	526	560
EA674_00335|4-hydroxyphenylpyruvate_dioxygenase	709.499	-1.04795	0.102075	-10.2664	9.9844e-25	8.19033e-23	764	595	450	783	362	667	447	426	696	1237	1333	1281
EA674_13130|NCS2_family_permease	470.97	12.0118	1.18123	10.1689	2.73016e-24	2.20513e-22	880	697	621	734	400	615	551	403	677	0	0	0
CP039993_1178796_1178900	111.902	6.715	0.662286	10.1391	3.70382e-24	2.94622e-22	179	175	148	173	105	152	126	85	171	1	1	3
EA674_09285|quinoprotein_glucose_dehydrogenase	973.635	-0.984103	0.0972636	-10.1179	4.60204e-24	3.60608e-22	1144	825	697	1126	405	816	559	672	820	1685	1801	1948
EA674_07485|hypothetical_protein	871.723	-0.930928	0.0930758	-10.0018	1.49613e-23	1.1551e-21	868	702	758	882	515	679	694	491	759	1402	1592	1651
EA674_09680|hypothetical_protein	66.851	-2.34822	0.239223	-9.816	9.60774e-23	7.31024e-21	29	48	33	31	29	24	26	26	40	177	198	217
EA674_12590|hypothetical_protein	710.86	-0.911455	0.0939335	-9.7032	2.92198e-22	2.19149e-20	883	577	550	827	341	589	485	416	550	1195	1339	1357
EA674_03835|type_I_secretion_C-terminal_target_domain-containing_protein	1506.19	-1.0844	0.113768	-9.53175	1.54652e-21	1.14355e-19	1237	1283	1284	1426	959	1151	1170	613	1385	2914	2697	2927
CP039993_2591069_2591413	119.02	-1.83062	0.193663	-9.45264	3.30406e-21	2.40921e-19	113	70	66	131	32	104	36	44	82	290	327	292
EA674_00350|maleylacetoacetate_isomerase	149.886	-1.48005	0.157982	-9.36849	7.35788e-21	5.29162e-19	129	95	103	160	68	135	93	69	132	319	340	287
EA674_09835|hypothetical_protein	106.418	-1.72185	0.185666	-9.27391	1.79449e-20	1.27312e-18	99	68	62	97	40	75	57	51	64	195	266	322
EA674_18285|TonB-dependent_copper_receptor	477.688	1.07529	0.116095	9.26213	2.00396e-20	1.40277e-18	646	612	556	751	364	561	495	391	490	316	276	310
EA674_10735|malate_synthase_G	3386.38	-0.816269	0.0890533	-9.16607	4.90574e-20	3.38883e-18	4022	2751	2544	3909	1777	3291	2135	2324	3284	4928	5671	6317
EA674_03515|phosphoethanolamine--lipid_A_transferase	51.7537	-2.27123	0.249349	-9.10864	8.3419e-20	5.68766e-18	31	31	25	35	12	33	19	25	36	142	140	156
EA674_05095|NADP-dependent_isocitrate_dehydrogenase	5272.01	0.604933	0.0665961	9.08362	1.05024e-19	7.06894e-18	8059	6021	5888	7374	3763	5658	4663	3801	5940	4769	4370	4461
EA674_19360|ParB/RepB/Spo0J_family_partition_protein	197.576	10.6884	1.1846	9.02276	1.83407e-19	1.21884e-17	331	282	261	380	164	289	180	174	299	0	0	0
EA674_05285|BapA_prefix-like_domain-containing_protein	195.128	-1.21107	0.13543	-8.94243	3.8071e-19	2.49841e-17	191	146	142	212	115	147	146	88	153	370	353	430
EA674_00875|acetate--CoA_ligase	461.503	-1.04978	0.117488	-8.93526	4.06235e-19	2.633e-17	558	359	337	595	141	472	197	328	340	866	853	950
EA674_00420|IS4_family_transposase_ISAba1	181.183	-1.22255	0.137186	-8.91161	5.02961e-19	3.22018e-17	170	164	135	177	80	162	94	95	120	339	392	412
EA674_04005|chaperonin_GroEL	3138.89	0.664975	0.0749311	8.87449	7.02552e-19	4.44385e-17	5018	3598	3263	4527	2099	3599	2450	2777	3499	2437	2554	2740
EA674_13625|hypothetical_protein	200.916	-1.50875	0.17158	-8.79326	1.45283e-18	9.08018e-17	182	146	111	186	84	175	109	141	154	302	499	493
EA674_04000|co-chaperone_GroES	1061.33	0.835512	0.0951749	8.7787	1.6537e-18	1.0214e-16	1799	1296	1116	1541	698	1179	866	967	1135	695	841	898
CP039993_792489_793635	124.638	-1.66121	0.189702	-8.75693	2.00634e-18	1.2248e-16	84	84	97	118	54	92	69	40	100	338	271	273
EA674_05050|cellulose_biosynthesis_cyclic_di-GMP-binding_regulatory_protein_BcsB	202.202	-1.22686	0.141036	-8.69886	3.35229e-18	2.02293e-16	177	170	147	180	121	170	140	104	149	358	438	412
EA674_18595|acyl-CoA_dehydrogenase	698.389	-0.931077	0.107194	-8.6859	3.75751e-18	2.2417e-16	873	534	577	680	302	670	425	412	592	1248	1289	1358
CP039993_2724787_2724940	140.396	10.2437	1.18556	8.64045	5.59915e-18	3.30287e-16	269	214	165	250	129	186	155	123	177	0	0	0
EA674_19720|hypothetical_protein	141.77	10.2297	1.18619	8.62397	6.46746e-18	3.77268e-16	268	171	201	230	128	212	137	142	185	0	0	0
EA674_04015|MBL_fold_metallo-hydrolase	141.218	-1.3121	0.152925	-8.58	9.48703e-18	5.47329e-16	130	107	96	153	63	98	85	94	123	270	294	295
EA674_16815|glutamate/aspartate:proton_symporter_GltP	4807.94	0.640081	0.0752047	8.51119	1.72164e-17	9.82456e-16	6667	5897	5157	6489	3796	5064	4759	3517	5218	3918	3941	4000
EA674_18425|NAD-dependent_malic_enzyme	300.117	1.03145	0.121739	8.47264	2.39899e-17	1.35427e-15	503	397	344	489	222	309	254	244	290	216	208	206
EA674_17635|H-NS_histone_family_protein	480.338	0.908057	0.107636	8.43639	3.27303e-17	1.82802e-15	685	611	507	753	358	528	473	405	510	295	331	376
EA674_19355|ParA_family_protein	127.966	9.99009	1.18638	8.42064	3.74448e-17	2.06932e-15	239	156	150	218	138	161	138	117	185	0	0	0
EA674_06185|acyl-CoA_dehydrogenase	1421.46	-0.635449	0.0755758	-8.4081	4.1672e-17	2.27894e-15	1819	1281	1216	1666	733	1344	920	892	1276	2126	2268	2539
CP039993_3842248_3842329	388.034	-0.887527	0.105937	-8.37788	5.38905e-17	2.91675e-15	455	334	300	440	193	336	239	283	273	638	689	758
EA674_15790|protein_FilA	376.23	-0.9243	0.111327	-8.30254	1.01906e-16	5.45926e-15	373	314	321	464	219	308	252	201	330	690	653	653
EA674_16695|MotA/TolQ/ExbB_proton_channel_family_protein	795.575	0.745522	0.0898492	8.29749	1.06338e-16	5.63916e-15	1277	916	930	1041	656	833	691	569	869	642	649	638
CP039993_2564176_2564778	47.4547	-2.28317	0.277072	-8.24034	1.71724e-16	9.01552e-15	33	27	20	37	22	27	24	9	27	100	132	173
EA674_03410|long-chain_fatty_acid_transporter	2611.89	-0.591913	0.0720049	-8.22045	2.02746e-16	1.05388e-14	3106	2436	2066	3193	1423	2627	1852	1788	2551	3939	3954	3959
EA674_19435|type_II_toxin-antitoxin_system_RelE/ParE_family_toxin	83.4631	9.73318	1.19077	8.17384	2.98724e-16	1.53755e-14	189	150	116	166	49	96	69	79	109	0	0	0
EA674_19300|H-NS_histone_family_protein	102.831	9.696	1.18723	8.16691	3.16387e-16	1.61265e-14	181	134	127	167	106	128	111	99	150	0	0	0
EA674_19270|hypothetical_protein	178.517	9.61582	1.18477	8.11621	4.80965e-16	2.42795e-14	329	256	229	303	140	236	226	169	224	1	0	0
EA674_19430|helix-turn-helix_transcriptional_regulator	78.353	9.57706	1.18995	8.0483	8.39494e-16	4.19747e-14	148	139	117	130	50	115	78	69	97	0	0	0
EA674_13005|OmpA_family_protein	124.91	-1.26698	0.157926	-8.02263	1.03508e-15	5.12658e-14	141	94	95	111	51	87	70	62	91	231	272	320
EA674_08195|D-amino_acid_dehydrogenase	281.413	-0.902298	0.112544	-8.01725	1.08135e-15	5.3057e-14	310	240	235	352	120	270	156	180	223	460	531	534
EA674_03830|flagellar_protein	147.925	-1.42434	0.177753	-8.01306	1.11888e-15	5.43898e-14	105	132	113	104	85	102	101	46	115	368	319	303
CP039993_2713030_2713352	131.783	10.2529	1.27999	8.01013	1.14584e-15	5.51894e-14	226	218	197	224	128	189	181	29	189	0	0	0
EA674_19265|hypothetical_protein	88.1487	9.50691	1.18824	8.00087	1.23547e-15	5.89658e-14	155	118	114	129	89	108	113	74	129	0	0	0
EA674_00925|cation_acetate_symporter	1503.44	-0.664353	0.0838323	-7.92478	2.28542e-15	1.08094e-13	1910	1257	1216	1923	706	1592	942	1072	1342	2273	2358	2520
EA674_06700|DUF2171_domain-containing_protein	1177.6	-1.02037	0.130403	-7.8247	5.08871e-15	2.38533e-13	1296	956	873	1099	527	1109	753	793	1034	1643	2200	2744
EA674_19260|DUF1173_domain-containing_protein	79.747	9.227	1.1916	7.74336	9.68199e-15	4.49827e-13	129	97	93	169	60	95	100	78	126	0	0	0
EA674_00345|VOC_family_protein	86.8093	-1.45031	0.18853	-7.69273	1.4403e-14	6.63296e-13	90	52	60	96	32	76	53	41	61	186	197	186
EA674_05900|hypothetical_protein	32.5688	-2.47549	0.32252	-7.67546	1.6482e-14	7.52441e-13	16	18	11	25	16	21	20	12	24	67	95	99
EA674_05800|LexA_family_transcriptional_regulator	67.7518	9.13522	1.19322	7.65595	1.91882e-14	8.68433e-13	131	84	86	109	50	112	79	56	102	0	0	0
EA674_00835|putative_porin	2028.3	-0.517812	0.0676593	-7.65323	1.96e-14	8.79485e-13	2395	1845	1842	2441	1157	1894	1510	1402	1910	2876	2962	3225
EA674_02260|hypothetical_protein	166.148	-1.10677	0.14487	-7.63977	2.17615e-14	9.66036e-13	174	128	124	159	88	139	97	88	175	285	320	347
EA674_15020|peptidoglycan-binding_protein_LysM	1031.14	-0.604649	0.0791533	-7.63897	2.18968e-14	9.66036e-13	1173	924	943	1193	611	894	783	659	957	1574	1489	1759
EA674_10195|thiamine_pyrophosphate-dependent_dehydrogenase_E1_component_subunit_alpha	3599.03	-0.627855	0.0824769	-7.61249	2.68857e-14	1.16662e-12	4149	3053	3299	4753	1816	3540	2488	2420	3142	5969	5519	5367
CP039993_3142364_3142591	332.58	-0.908609	0.119358	-7.61248	2.68878e-14	1.16662e-12	381	288	265	317	174	310	212	216	245	522	597	702
EA674_01795|N-succinylarginine_dihydrolase	534.184	-0.792592	0.104187	-7.60741	2.79648e-14	1.2034e-12	597	488	431	657	319	495	318	322	427	980	891	850
EA674_09315|TetR/AcrR_family_transcriptional_regulator	56.1916	6.54749	0.862582	7.59058	3.18481e-14	1.35937e-12	138	76	62	104	26	115	35	75	53	0	0	3
EA674_18780|L-lactate_permease	37.98	2.57572	0.339429	7.58839	3.23903e-14	1.37137e-12	71	59	59	62	24	54	26	40	33	16	9	8
EA674_19200|GlsB/YeaQ/YmgE_family_stress_response_membrane_protein	244.918	-0.897307	0.118907	-7.54629	4.47827e-14	1.88087e-12	291	208	198	251	115	218	156	165	177	428	454	461
CP039994_7161_7226	58.1063	8.93038	1.193	7.48565	7.11917e-14	2.96632e-12	96	79	83	98	50	70	67	52	90	0	0	0
EA674_18590|enoyl-CoA_hydratase	336.868	-0.911106	0.122678	-7.42681	1.11246e-13	4.59876e-12	462	251	267	354	161	304	215	175	263	628	630	626
CP039993_1391182_1391329	919.62	-0.922178	0.124766	-7.39128	1.45427e-13	5.96478e-12	1037	811	716	851	438	796	579	638	782	1303	1662	2094
EA674_12560|type_IV_secretion_protein_Rhs	123.242	-1.17305	0.159352	-7.36135	1.82056e-13	7.40924e-12	113	106	96	114	61	97	94	55	98	226	256	260
EA674_19520|hypothetical_protein	86.1723	8.74316	1.18817	7.35852	1.85966e-13	7.51016e-12	177	140	127	149	75	107	81	75	100	1	0	0
EA674_08770|ATP-dependent_Clp_protease_ATP-binding_subunit_ClpA	1444.37	-0.532542	0.0724089	-7.35465	1.91428e-13	7.67172e-12	1771	1398	1257	1766	735	1367	1026	975	1319	2112	2234	2295
EA674_19515|conjugative_relaxase	50.7183	8.78414	1.19543	7.34813	2.00992e-13	7.994e-12	104	62	70	90	36	81	49	56	58	0	0	0
CP039993_3772894_3773385	7829.48	0.576582	0.078557	7.33966	2.1413e-13	8.45248e-12	10935	9853	8473	10343	6050	8385	6948	5987	8011	6304	6847	7357
EA674_00920|DUF485_domain-containing_protein	701.632	-0.72563	0.0996551	-7.28141	3.3034e-13	1.29424e-11	854	557	501	995	339	747	419	584	639	1024	1078	1145
CP039993_842493_842733	279.075	0.964331	0.132631	7.27077	3.57453e-13	1.39009e-11	531	361	303	416	155	290	229	249	297	228	195	205
EA674_19715|hypothetical_protein	46.4158	8.67983	1.19983	7.2342	4.6829e-13	1.80774e-11	101	68	52	77	49	74	42	41	48	0	0	0
EA674_15230|hypothetical_protein	798.067	-0.75478	0.104372	-7.23163	4.77244e-13	1.82885e-11	783	691	737	835	494	642	687	483	705	1188	1318	1418
EA674_11110|hypothetical_protein	18.5396	-8.81329	1.22576	-7.19008	6.47527e-13	2.46342e-11	0	0	0	0	0	0	0	0	2	67	108	85
EA674_01785|arginine_N-succinyltransferase	296.588	-0.88048	0.122628	-7.18011	6.96569e-13	2.63092e-11	305	262	218	320	171	256	217	202	276	561	472	465
EA674_04155|Tim44_domain-containing_protein	856.528	-0.727883	0.101459	-7.17418	7.27406e-13	2.72777e-11	982	723	820	895	488	765	579	445	806	1588	1366	1398
EA674_16520|NADP-dependent_glyceraldehyde-3-phosphate_dehydrogenase	215.215	-1.04063	0.145628	-7.14584	8.94452e-13	3.33041e-11	203	169	198	197	144	164	164	92	161	408	424	396
EA674_15285|hypothetical_protein	954.04	-0.747779	0.105207	-7.10766	1.18024e-12	4.36356e-11	1320	804	802	1127	367	858	495	699	758	1611	1665	1763
EA674_19330|hypothetical_protein	43.4642	8.49175	1.19818	7.08723	1.36822e-12	5.02317e-11	87	49	57	81	34	63	49	41	58	0	0	0
EA674_00115|sodium-dependent_transporter	469.595	-0.650045	0.0920789	-7.05965	1.6692e-12	6.08562e-11	576	426	415	561	246	435	322	270	415	763	748	794
EA674_15825|ribosome-associated_translation_inhibitor_RaiA	750.213	-0.710058	0.100718	-7.04999	1.78937e-12	6.45927e-11	903	701	583	853	350	760	528	500	646	1075	1331	1293
EA674_13200|hypothetical_protein	42.8929	8.47655	1.20244	7.04945	1.79629e-12	6.45927e-11	93	59	41	71	48	51	36	41	68	0	0	0
EA714_011155|hypothetical_protein	17.4584	-3.34367	0.47689	-7.01141	2.3592e-12	8.42571e-11	3	5	10	8	4	4	3	2	5	55	63	77
EA674_14950|4-(cytidine_5'-diphospho)-2-C-methyl-D-erythritol_kinase	2771.22	0.640995	0.0914645	7.00813	2.41531e-12	8.56782e-11	3746	3601	2743	3742	2384	2927	2518	2115	3044	2186	2231	2332
EA674_10190|alpha-ketoacid_dehydrogenase_subunit_beta	3290.93	-0.597156	0.0853807	-6.99404	2.67081e-12	9.41058e-11	4004	2813	2942	4159	1697	3345	2280	2215	2870	5610	4852	4798
EA674_06315|serine_hydroxymethyltransferase	2472.46	0.532499	0.0765316	6.9579	3.45378e-12	1.20882e-10	4063	2812	2646	3421	1731	2711	1943	1833	2626	2361	2218	2194
EA674_11765|iron-containing_redox_enzyme_family_protein	724.735	-0.992284	0.142781	-6.94968	3.66122e-12	1.27294e-10	602	609	604	610	522	560	697	350	645	960	1405	1461
EA674_19670|conjugal_transfer_protein_TraG	32.9828	8.36572	1.20817	6.92429	4.38183e-12	1.51346e-10	74	68	35	55	25	49	21	29	46	0	0	0
EA674_13215|RHS_repeat_protein	90.4649	-1.31925	0.190955	-6.90872	4.89038e-12	1.67807e-10	83	83	56	67	55	72	49	36	83	179	181	217
EA674_07940|hypothetical_protein	41.7849	8.26906	1.20261	6.87592	6.15932e-12	2.09977e-10	66	47	51	75	36	45	51	57	55	0	0	0
CP039994_70444_70511	35.7305	8.24926	1.20174	6.86445	6.67501e-12	2.26089e-10	77	46	41	56	34	45	42	32	50	0	0	0
EA674_08610|Grx4_family_monothiol_glutaredoxin	995.894	0.53534	0.0780135	6.86215	6.78328e-12	2.28284e-10	1534	1119	1079	1459	698	1028	816	770	1102	857	894	915
EA674_19310|hypothetical_protein	40.3246	8.24371	1.20169	6.86012	6.88033e-12	2.30075e-10	60	63	38	76	37	51	42	48	56	0	0	0
CP039993_1442106_1442338	596.042	-0.738556	0.107928	-6.84303	7.7534e-12	2.57629e-10	769	508	489	661	291	527	344	453	498	907	975	1159
EA674_04130|FdhF/YdeP_family_oxidoreductase	325.829	-0.921499	0.134744	-6.8389	7.98053e-12	2.63508e-10	356	266	271	378	141	326	169	188	331	516	595	649
CP039994_14068_14260	38.4777	8.21934	1.20366	6.82862	8.57377e-12	2.81327e-10	82	46	34	71	42	49	40	35	57	0	0	0
EA674_05905|Ig_domain-containing_protein	34.4179	-2.01631	0.295322	-6.8275	8.64088e-12	2.81768e-10	26	19	20	34	8	24	16	11	27	86	93	94
EA674_19700|hypothetical_protein	35.613	8.2056	1.20215	6.82579	8.74457e-12	2.83389e-10	69	44	45	55	35	51	34	38	47	0	0	0
EA674_06725|NirD/YgiW/YdeI_family_stress_tolerance_protein	205.82	-0.926309	0.136017	-6.81024	9.74366e-12	3.13829e-10	221	165	184	201	110	171	136	121	177	308	388	435
EA674_14350|malate_dehydrogenase_(quinone)	892.052	0.668066	0.0982319	6.8009	1.03964e-11	3.32812e-10	1292	1186	960	1298	713	884	791	572	993	782	723	748
EA674_08245|UMP_kinase	1770.05	0.494275	0.0727419	6.79492	1.08376e-11	3.44831e-10	2632	2007	1952	2414	1232	1855	1601	1251	1975	1700	1554	1599
CP039520_1724975_1725164	13.3185	-5.06081	0.745076	-6.79235	1.10322e-11	3.48911e-10	2	3	0	2	0	2	3	0	2	54	54	65
EA674_08525|quinoprotein_glucose_dehydrogenase	160.152	-1.04003	0.153873	-6.75902	1.38932e-11	4.36762e-10	166	130	110	175	88	142	102	95	163	226	317	323
EA674_07345|peptidyl-prolyl_cis-trans_isomerase	787.019	0.564444	0.0836286	6.74941	1.48444e-11	4.63888e-10	1260	934	805	1133	514	848	670	636	816	661	699	734
CP039993_1417376_1417432	65.9189	-1.81229	0.268587	-6.7475	1.50411e-11	4.67254e-10	62	47	28	65	42	40	22	20	46	114	167	215
CP039993_484844_485304	9013	0.532657	0.0790186	6.7409	1.5741e-11	4.8612e-10	12438	11447	9564	11738	7021	9393	7912	6782	9518	7358	8133	8682
EA674_07515|hypothetical_protein	176.545	-0.98044	0.14568	-6.73011	1.6954e-11	5.20519e-10	212	112	143	172	103	145	134	103	162	315	286	349
EA674_07530|universal_stress_protein	347.612	-0.71016	0.105823	-6.71083	1.93515e-11	5.9067e-10	440	310	279	435	181	331	211	239	260	546	614	576
EA674_18585|enoyl-CoA_hydratase/isomerase_family_protein	419.025	-0.797545	0.11888	-6.70882	1.96211e-11	5.95437e-10	571	331	339	461	210	337	304	224	375	807	682	718
CP039993_3270319_3271038	2839.13	0.742002	0.110621	6.70759	1.9786e-11	5.96991e-10	3849	3709	3118	3649	2592	2875	2696	2104	2944	1886	2430	2377
EA674_03140|toxin	122.135	-1.0547	0.157566	-6.69371	2.17579e-11	6.52738e-10	122	85	97	150	63	105	92	73	108	205	224	227
CP039993_519472_519805	26498.5	0.488377	0.0731955	6.67223	2.51953e-11	7.51564e-10	37756	31776	28686	33419	21125	27434	23340	19418	27559	23078	24310	25580
EA674_11225|amino_acid_ABC_transporter_permease	201.663	-0.901608	0.135259	-6.66579	2.63252e-11	7.80831e-10	251	182	146	240	82	195	90	143	155	331	389	395
EA674_14805|EcsC_family_protein	1329.32	-0.510364	0.07682	-6.64363	3.06055e-11	9.0269e-10	1582	1249	1170	1781	687	1293	924	927	1248	1810	1948	2171
EA674_00045|RND_transporter	1089.29	-0.513481	0.0773744	-6.63632	3.21619e-11	9.43296e-10	1442	1010	887	1416	582	1116	721	761	944	1611	1573	1725
EA674_19735|ATP-binding_protein	263.574	0.865074	0.130521	6.62787	3.40556e-11	9.93289e-10	389	340	289	411	186	291	221	232	278	155	223	204
EA674_12975|hypothetical_protein	847.812	-0.589867	0.0892764	-6.60719	3.91673e-11	1.13607e-09	955	731	804	969	487	737	659	568	809	1260	1222	1433
EA674_16300|enoyl-ACP_reductase	485.311	0.740217	0.112272	6.59308	4.30795e-11	1.24268e-09	704	685	577	680	372	501	374	332	507	437	401	392
EA674_06070|DUF4102_domain-containing_protein	31.6883	7.98568	1.21205	6.58859	4.44011e-11	1.2738e-09	66	36	35	61	29	35	22	37	57	0	0	0
EA674_06955|hypothetical_protein	2255.84	-0.714162	0.108412	-6.58748	4.47344e-11	1.27639e-09	2983	1920	1910	2484	1040	2069	1395	1624	1811	3063	3836	4641
EA674_03995|BapA_prefix-like_domain-containing_protein	154.032	-1.00656	0.152894	-6.58341	4.59792e-11	1.30482e-09	203	128	104	141	75	127	116	73	118	273	300	323
EA674_13925|copper_resistance_protein_NlpE	768.386	-0.619875	0.0944057	-6.56607	5.16602e-11	1.45815e-09	839	665	715	833	453	685	657	479	725	1091	1159	1317
CP039993_3940635_3940968	26534.9	0.476275	0.0727663	6.54526	5.9391e-11	1.66739e-09	37724	31495	28670	33510	21180	27435	23664	19355	27524	23331	24386	25599
EA674_19690|hypothetical_protein	27.9298	7.91225	1.21276	6.52418	6.83764e-11	1.90945e-09	43	50	34	43	26	41	18	34	38	0	0	0
CP039520_782611_783070	91.0634	-1.25816	0.193073	-6.51649	7.19709e-11	1.99919e-09	85	79	65	82	31	82	66	56	53	170	198	203
EA674_17775|threonine_synthase	1680.44	0.47923	0.073603	6.51101	7.46453e-11	2.06257e-09	2481	1930	1722	2383	1238	1805	1459	1203	1881	1600	1403	1553
EA674_19500|hypothetical_protein	28.4063	7.85617	1.20901	6.49802	8.13856e-11	2.23704e-09	46	46	31	48	30	36	26	32	36	0	0	0
EA674_12680|universal_stress_protein	649.03	-0.668905	0.102998	-6.49433	8.34037e-11	2.28057e-09	854	565	535	767	271	658	402	472	554	974	1106	1118
EA674_19295|nuclease	27.0216	7.84195	1.2103	6.47935	9.21213e-11	2.50589e-09	43	39	39	40	23	25	41	25	39	0	0	0
EA674_02920|acetyl-CoA_carboxylase_carboxyltransferase_subunit_beta	1442.85	0.525244	0.0811869	6.46956	9.8286e-11	2.6598e-09	2048	1738	1553	2070	1035	1603	1199	1136	1455	1370	1233	1255
EA674_19305|hypothetical_protein	26.6051	7.89082	1.21994	6.46821	9.91725e-11	2.67003e-09	57	46	25	39	31	30	26	33	22	0	0	0
EA674_08040|acetyl-CoA_carboxylase_biotin_carboxylase_subunit	1312.93	0.59681	0.0923213	6.46449	1.01641e-10	2.72253e-09	1983	1687	1445	1793	952	1383	1019	1031	1326	1288	1124	1097
EA674_08045|acetyl-CoA_carboxylase_biotin_carboxyl_carrier_protein	607.998	0.59074	0.0914101	6.46252	1.02972e-10	2.74418e-09	950	718	641	846	451	676	493	493	604	498	530	559
CP039993_3636006_3636169	2832.24	0.548513	0.0849848	6.45425	1.08758e-10	2.88372e-09	3830	3301	2884	3759	2236	3065	2557	2454	3076	2187	2427	2524
EA674_19555|resolvase	29.0938	7.79406	1.21058	6.43829	1.20828e-10	3.18766e-09	59	30	31	61	16	46	33	32	43	0	0	0
EA674_13485|hypothetical_protein	70.5719	-1.32097	0.205728	-6.42096	1.35418e-10	3.55473e-09	60	60	40	80	40	57	46	43	56	129	152	134
EA674_06065|hypothetical_protein	26.6968	7.76754	1.21034	6.41765	1.38397e-10	3.61483e-09	47	35	34	44	23	28	27	27	50	0	0	0
EA674_19335|phosphohydrolase	25.7827	7.78746	1.2153	6.40783	1.47608e-10	3.83635e-09	59	38	23	44	18	50	27	23	30	0	0	0
EA674_12705|RND_transporter	176.527	-0.952632	0.149018	-6.39271	1.6297e-10	4.21475e-09	164	144	167	188	109	140	107	90	164	347	287	331
EA714_009080|calcium-binding_protein	67.6255	-1.35017	0.211386	-6.38723	1.68914e-10	4.34706e-09	59	55	54	65	33	34	52	26	46	149	142	157
EA674_03820|Biofilm_associated_protein	50.9806	-1.63619	0.256379	-6.38191	1.74892e-10	4.47893e-09	53	34	35	37	21	32	23	13	34	169	108	113
EA674_01040|hydrolase	513.066	-0.577062	0.0905635	-6.3719	1.86699e-10	4.75811e-09	621	493	458	603	297	407	371	317	475	798	809	828
EA674_19315|hypothetical_protein	25.4178	7.75366	1.21787	6.36657	1.93299e-10	4.9025e-09	47	35	33	48	21	48	33	13	28	0	0	0
EA674_19680|hypothetical_protein	23.6412	7.71238	1.21315	6.3573	2.05327e-10	5.18254e-09	47	34	31	52	17	34	25	17	31	0	0	0
CP039993_517126_517666	3145.39	0.743414	0.117209	6.34263	2.25872e-10	5.67381e-09	4207	4198	3248	4013	2843	3326	3177	2313	3250	1966	2590	2745
EA674_16150|Re/Si-specific_NAD(P)(+)_transhydrogenase_subunit_alpha	542.337	-0.622718	0.098583	-6.31668	2.67234e-10	6.68085e-09	713	494	458	626	286	549	327	323	488	850	914	878
EA674_05055|glycosyltransferase_family_2_protein	88.2561	-1.16474	0.185187	-6.28954	3.184e-10	7.92227e-09	87	68	72	86	56	68	55	33	75	156	172	203
EA674_07510|OmpW_family_protein	47.553	-1.6735	0.266165	-6.28747	3.22675e-10	7.99077e-09	44	29	31	64	15	31	25	18	29	134	110	98
EA674_10170|2,3-butanediol_dehydrogenase	1075.69	-0.6464	0.103085	-6.27053	3.59813e-10	8.86862e-09	1387	914	1030	1290	471	989	666	719	869	2021	1671	1694
EA674_15040|50S_ribosomal_protein_L32	4309.75	0.399679	0.0637527	6.26921	3.6288e-10	8.90243e-09	5987	4941	4350	5613	3251	4450	4027	3214	4781	3796	3965	4283
CP039993_2427506_2427790	82091.7	-0.658879	0.105202	-6.26298	3.777e-10	9.19604e-09	80111	75896	81439	78554	52349	67819	67259	49741	73765	118910	126922	151923
EA674_15185|hypothetical_protein	384.048	-0.635356	0.10146	-6.26214	3.79722e-10	9.19604e-09	443	365	346	459	215	322	262	243	335	648	605	611
CP039994_38543_38633	23.1384	7.60151	1.21391	6.26199	3.80103e-10	9.19604e-09	34	33	35	45	14	40	20	30	23	0	0	0
EA674_15045|DUF177_domain-containing_protein	7348.67	0.40672	0.0651067	6.24699	4.18451e-10	1.00774e-08	10101	8640	7479	9813	5614	7773	6729	5204	7996	6615	6928	7040
CP039993_794457_794871	67.5252	-1.40556	0.225172	-6.24214	4.31617e-10	1.0347e-08	42	61	56	53	34	33	48	29	60	160	143	143
EA674_08985|amidase	51.8988	-1.47406	0.236388	-6.23579	4.49496e-10	1.07266e-08	39	31	37	62	32	43	36	27	42	104	103	103
EA674_11760|catalase_HPII	4911.23	-0.714001	0.114796	-6.21974	4.9797e-10	1.18296e-08	4318	4234	4685	4627	3622	3997	4783	2569	4811	6946	7595	8547
CP039994_32043_32621	22.8672	7.56575	1.21787	6.21228	5.22208e-10	1.23495e-08	40	37	24	36	26	31	21	27	23	0	0	0
CP039993_3758794_3759107	122.134	-1.08224	0.174309	-6.20871	5.34223e-10	1.2577e-08	142	76	97	145	58	105	78	96	71	206	234	248
EA674_11045|methionine_adenosyltransferase	867.62	0.537961	0.0867198	6.20344	5.52416e-10	1.29473e-08	1400	936	870	1224	591	1002	740	655	1010	708	742	824
CP039993_843024_843082	805.579	0.645459	0.104201	6.19438	5.85131e-10	1.36531e-08	1209	888	844	1110	564	970	661	778	834	550	653	748
CP039993_3636454_3636510	3300.64	0.571159	0.0923241	6.18645	6.15344e-10	1.42945e-08	4372	4261	3415	4522	2675	3383	2827	2685	3473	2731	2765	2991
EA674_01790|succinylglutamate-semialdehyde_dehydrogenase	422.596	-0.743694	0.120305	-6.18172	6.34056e-10	1.46047e-08	480	391	375	476	231	417	258	267	295	841	653	673
CP039993_1057136_1057536	624.959	0.585922	0.0947837	6.18167	6.34261e-10	1.46047e-08	835	763	719	838	461	655	584	452	701	532	551	532
EA674_07225|DUF490_domain-containing_protein	833.22	-0.565211	0.0917196	-6.16238	7.16606e-10	1.64287e-08	848	744	760	978	553	787	697	468	906	1160	1168	1323
EA674_18010|DDE-type_integrase/transposase/recombinase	332.903	-0.642374	0.104361	-6.1553	7.49332e-10	1.71043e-08	363	302	273	387	196	324	257	216	333	467	504	553
EA674_14985|aminoacyl-tRNA_hydrolase	1117.59	0.5269	0.0858574	6.13692	8.41382e-10	1.91223e-08	1594	1377	1209	1505	907	1058	1044	706	1261	1031	928	1064
CP039993_3089907_3089981	5791.94	0.441819	0.0723638	6.10552	1.02467e-09	2.31454e-08	7980	6777	5724	7812	4487	6037	5402	4407	6336	4812	5470	5390
EA674_18925|acyl-CoA_desaturase	18.5312	-2.71428	0.44459	-6.10512	1.02722e-09	2.31454e-08	8	9	10	10	5	9	7	2	4	84	41	61
EA674_19325|hypothetical_protein	19.9032	7.44453	1.21983	6.10295	1.04131e-09	2.33627e-08	44	29	21	36	15	24	26	15	30	0	0	0
EA674_11310|tautomerase_family_protein	48.6774	-1.53345	0.251608	-6.09459	1.09715e-09	2.45109e-08	45	38	33	44	26	26	20	13	44	98	113	139
CP039993_1090534_1090810	348.892	-0.709789	0.116634	-6.08561	1.16046e-09	2.58153e-08	401	291	318	420	180	319	204	285	267	530	607	580
EA674_18200|DUF2726_domain-containing_protein	66.1621	-1.25309	0.206134	-6.07899	1.20943e-09	2.67912e-08	74	48	54	68	34	52	30	29	37	141	151	142
CP039994_9852_10364	19.4058	7.42533	1.22314	6.07073	1.27328e-09	2.80871e-08	40	26	26	48	11	24	16	18	30	0	0	0
EA674_11775|hypothetical_protein	124686	-0.629611	0.103848	-6.06282	1.33753e-09	2.93809e-08	123748	116043	127390	117161	79869	101889	102459	73023	112439	189051	187716	225832
EA674_12875|four-helix_bundle_copper-binding_protein	413.053	-0.612476	0.101193	-6.05254	1.42578e-09	3.11888e-08	499	400	367	450	193	396	280	287	349	658	632	722
CP039993_947315_947403	29.0271	4.27948	0.708902	6.03677	1.57226e-09	3.42505e-08	43	36	16	60	29	35	42	26	48	1	4	0
EA674_19705|hypothetical_protein	17.0444	7.40659	1.22705	6.03609	1.57892e-09	3.42534e-08	41	23	27	31	7	27	20	15	18	0	0	0
EA674_16200|aconitate_hydratase_AcnA	746.408	-0.561815	0.0931014	-6.03444	1.59512e-09	3.44626e-08	846	690	679	874	383	715	528	498	782	1112	1094	1204
EA674_18295|peptide_deformylase	746.209	0.492044	0.0815823	6.03126	1.62684e-09	3.50038e-08	1192	899	788	1059	471	813	570	604	734	697	695	724
EA674_19650|conjugal_transfer_protein_TraN	18.1493	7.43021	1.23435	6.01954	1.74911e-09	3.74808e-08	37	32	23	49	19	16	10	17	18	0	0	0
EA674_15190|hypothetical_protein	335.94	-0.629692	0.104668	-6.01607	1.78698e-09	3.81367e-08	412	293	278	407	207	316	257	195	299	507	502	565
EA674_13135|hypothetical_protein	17.7089	7.34222	1.22263	6.00527	1.91013e-09	4.06e-08	33	26	27	32	9	31	18	19	18	0	0	0
EA674_10315|hypothetical_protein	225.724	-0.757423	0.126248	-5.99947	1.97967e-09	4.19083e-08	272	205	177	265	119	232	144	146	166	326	396	423
CP039993_2425247_2425301	705.841	-0.800357	0.133496	-5.99537	2.03028e-09	4.2807e-08	593	662	663	662	469	570	582	328	751	949	1286	1321
EA674_03305|alanine:cation_symporter_family_protein	706.81	0.569861	0.0952062	5.98554	2.15672e-09	4.52911e-08	1000	886	709	987	571	767	633	480	792	633	577	606
EA674_04460|7-carboxy-7-deazaguanine_synthase_QueE	878.502	0.547768	0.0915683	5.98207	2.20316e-09	4.6082e-08	1212	1031	996	1181	733	854	808	553	1043	812	719	782
EA674_07935|hypothetical_protein	18.4459	7.30496	1.22212	5.97731	2.2685e-09	4.72604e-08	33	26	25	28	19	27	18	20	19	0	0	0
EA674_09185|alpha/beta_hydrolase	1650.36	-0.455819	0.0762774	-5.97581	2.28954e-09	4.75102e-08	1897	1602	1526	1870	961	1497	1360	1067	1663	2271	2322	2608
CP039993_2316579_2317116	280.139	-0.821507	0.137952	-5.95501	2.60056e-09	5.37517e-08	330	273	255	360	90	298	115	144	211	484	548	547
EA674_14975|ribose-phosphate_pyrophosphokinase	7161.17	0.403423	0.0677569	5.95398	2.61699e-09	5.38793e-08	9733	8482	7414	9137	5471	7411	6622	4830	8327	6873	6670	6633
EA674_09240|type_1_glutamine_amidotransferase_domain-containing_protein	147.815	-1.007	0.169362	-5.94583	2.75054e-09	5.64076e-08	169	129	98	154	49	140	83	128	117	252	292	276
EA674_01780|aspartate_aminotransferase_family_protein	588.449	-0.593631	0.0998921	-5.94272	2.8033e-09	5.72659e-08	685	582	472	760	326	564	369	430	513	996	822	902
EA674_08835|phosphopyruvate_hydratase	2554.71	0.413361	0.0696203	5.93736	2.89648e-09	5.894e-08	3817	2807	2625	3516	1834	2821	2212	1860	2765	2454	2392	2327
EA674_13285|TonB-dependent_receptor	156.916	0.955071	0.161511	5.91336	3.35198e-09	6.79455e-08	247	238	183	198	106	123	173	115	172	122	117	120
EA674_09855|hypothetical_protein	61.8513	-1.27535	0.215844	-5.90867	3.44877e-09	6.96387e-08	72	53	49	65	17	49	24	29	25	111	161	165
EA674_16510|alpha/beta_hydrolase	231.145	-0.79795	0.13567	-5.88157	4.06404e-09	8.17479e-08	295	221	185	244	125	181	158	109	185	486	383	386
EA674_18290|DUF2946_domain-containing_protein	303.84	0.708996	0.120595	5.87914	4.12394e-09	8.26361e-08	454	407	346	425	205	348	219	243	324	284	246	238
EA674_06100|alpha/beta_hydrolase	170.594	-0.883658	0.15068	-5.86446	4.50603e-09	8.99492e-08	212	117	145	231	71	168	94	110	146	263	302	338
CP039993_3140559_3140687	137.095	-0.975511	0.16637	-5.86348	4.53254e-09	9.01358e-08	118	107	122	129	99	95	105	90	123	220	227	271
EA674_06225|elongation_factor_Ts	4101.5	0.442696	0.0756249	5.85383	4.80369e-09	9.51674e-08	6166	4781	4121	5865	2906	4565	3570	2909	4244	3997	3790	3656
EA674_19695|hypothetical_protein	16.035	7.24611	1.24034	5.84206	5.15602e-09	1.01764e-07	37	30	15	35	16	19	12	7	27	0	0	0
EA674_01695|FAD-binding_oxidoreductase	1017.53	0.478205	0.0819535	5.83507	5.37674e-09	1.05723e-07	1649	1154	1033	1568	680	1126	769	795	1017	947	910	979
EA674_11220|amino_acid_ABC_transporter_permease	239.131	-0.773002	0.132802	-5.8207	5.86005e-09	1.14796e-07	301	208	183	267	114	224	128	186	211	362	424	433
EA674_19685|Y-family_DNA_polymerase	15.0009	7.19193	1.23719	5.8131	6.13277e-09	1.19692e-07	30	33	15	25	7	17	16	17	21	0	0	0
EA674_06600|amidophosphoribosyltransferase	1494.25	0.437064	0.0752982	5.80444	6.45819e-09	1.25576e-07	2344	1579	1553	2093	986	1642	1288	1104	1704	1356	1370	1445
EA674_01800|succinylglutamate_desuccinylase	236.991	-0.81255	0.140416	-5.78672	7.17734e-09	1.39044e-07	236	229	188	315	123	208	180	154	169	446	363	387
EA674_04310|AI-2E_family_transporter	385.751	-0.618004	0.106915	-5.78035	7.45469e-09	1.43886e-07	419	381	356	431	214	330	288	200	403	602	595	659
EA674_10265|hypothetical_protein	22.6099	-2.09712	0.363397	-5.77086	7.88669e-09	1.51667e-07	16	19	8	13	8	11	9	13	9	61	61	69
EA674_06940|DNA-binding_transcriptional_regulator_Fis	1466.6	0.462285	0.0802864	5.75795	8.51429e-09	1.63139e-07	2023	1709	1571	1891	1167	1562	1323	997	1661	1372	1341	1293
EA674_00985|DUF475_domain-containing_protein	210.73	0.749556	0.130364	5.7497	8.94001e-09	1.70673e-07	339	287	246	292	137	239	163	149	218	193	182	163
EA674_18740|2-methylcitrate_synthase	632.2	-0.648721	0.113026	-5.73959	9.49034e-09	1.80523e-07	735	516	639	800	348	577	454	360	496	1103	1000	983
EA674_05390|elongation_factor_P	2811.54	0.421094	0.073412	5.73604	9.69168e-09	1.83687e-07	3960	3213	3088	3894	2020	3039	2372	2103	2872	2809	2487	2682
EA674_11835|methylcrotonoyl-CoA_carboxylase	1095.74	-0.564985	0.0987153	-5.72338	1.04427e-08	1.9721e-07	1412	897	868	1467	526	1205	744	809	1104	1510	1619	1699
EA674_10060|aspartate_ammonia-lyase	5097.68	0.330158	0.0577008	5.72189	1.05347e-08	1.98234e-07	7467	5440	5204	7133	3588	5621	4221	3836	5423	4791	4877	5244
EA674_14810|beta-ketoacyl-ACP_synthase_II	2144.24	0.480594	0.0840043	5.72106	1.05864e-08	1.98495e-07	3178	2569	2278	3008	1552	2429	1553	1746	2103	2095	1896	1973
EA674_10385|TonB-dependent_siderophore_receptor	93.0766	1.13222	0.198519	5.70332	1.17495e-08	2.19518e-07	145	147	113	119	87	89	69	71	94	62	65	66
CP039993_1181156_1181221	31.1577	6.90239	1.21045	5.70233	1.18179e-08	2.20013e-07	65	40	22	61	26	56	29	32	42	0	0	1
EA674_18045|hypothetical_protein	2428.75	-0.588727	0.103281	-5.70023	1.19647e-08	2.21961e-07	2323	2339	2244	2530	1733	2037	2333	1195	2446	3581	3445	3949
CP039994_16294_16429	15.8353	7.01028	1.23034	5.69784	1.21335e-08	2.243e-07	30	20	19	27	17	18	17	19	17	0	0	0
EA674_11275|redox-regulated_ATPase_YchF	980.021	0.44273	0.0782635	5.65692	1.54117e-08	2.83634e-07	1453	1084	1032	1271	740	981	934	707	1071	906	890	924
EA674_08635|hypothetical_protein	645.265	-0.552918	0.0977496	-5.65648	1.54513e-08	2.83634e-07	845	580	538	788	332	618	460	461	565	855	986	1134
EA674_15765|protein_FilF	172.838	-0.793167	0.140344	-5.6516	1.58957e-08	2.90775e-07	183	171	140	186	98	149	111	90	175	268	319	305
CP039993_74945_75303	112.714	-0.985601	0.174961	-5.63326	1.76832e-08	3.2235e-07	97	96	80	164	64	85	87	72	113	176	186	203
EA674_00270|DUF1328_domain-containing_protein	1476.68	-0.5003	0.0888331	-5.63191	1.78229e-08	3.23773e-07	1637	1403	1521	1578	942	1264	1173	804	1403	2089	2242	2453
EA674_09825|phage_capsid_protein	44.2094	-1.41814	0.253135	-5.60233	2.11486e-08	3.82862e-07	50	32	28	38	18	30	28	12	41	89	101	113
EA674_08705|adenosine_kinase	476.625	0.564597	0.100914	5.59484	2.20822e-08	3.98389e-07	749	528	492	657	356	480	449	344	554	446	395	392
EA674_19135|5-(carboxyamino)imidazole_ribonucleotide_synthase	576.107	0.577127	0.103343	5.58457	2.34282e-08	4.20367e-07	973	651	586	832	354	673	465	437	657	540	493	487
EA674_16140|NAD(P)(+)_transhydrogenase_(Re/Si-specific)_subunit_beta	401.345	-0.645935	0.115669	-5.58433	2.34605e-08	4.20367e-07	550	355	341	518	190	346	247	226	375	697	617	691
EA674_00670|HPF/RaiA_family_ribosome-associated_protein	2432.82	-0.508518	0.0911362	-5.57976	2.40853e-08	4.30094e-07	3253	2141	2091	3174	1089	2537	1504	1984	2086	3318	3830	3810
EA674_08615|aspartate_aminotransferase_family_protein	232.748	0.719994	0.129377	5.56507	2.62041e-08	4.66345e-07	400	260	245	348	148	304	179	181	253	195	183	187
EA674_17485|hypothetical_protein	82.1241	-1.14491	0.206229	-5.55163	2.83012e-08	5.01964e-07	85	68	47	95	32	77	58	62	67	118	151	189
EA674_02350|malate_dehydrogenase	4379.45	0.442324	0.0798193	5.54157	2.99775e-08	5.29905e-07	6731	4775	4508	5892	3234	4750	3925	3123	4732	4414	3878	3845
EA674_10340|DUF937_domain-containing_protein	336.245	-0.579107	0.104617	-5.53552	3.10312e-08	5.46691e-07	406	295	278	422	179	354	229	258	295	467	502	546
EA674_08250|ribosome_recycling_factor	1196.25	0.473672	0.0857016	5.52699	3.25767e-08	5.72e-07	1890	1287	1332	1713	753	1344	1027	875	1240	1183	1088	1081
EA674_11030|polyisoprenoid-binding_protein	436.255	-0.551949	0.100087	-5.51471	3.49363e-08	6.11386e-07	576	404	362	570	228	396	275	299	401	629	683	718
EA674_03875|transcription_elongation_factor_GreA	991.398	0.465917	0.0846245	5.50569	3.67722e-08	6.41375e-07	1473	1077	1026	1400	643	1090	799	874	1117	870	896	913
EA674_14345|choline_dehydrogenase	4594.11	0.419639	0.0764154	5.49155	3.98429e-08	6.92633e-07	7071	5222	5200	5930	3031	4839	3931	3151	4899	4907	4283	4350
EA674_08555|PTS_fructose_transporter_subunit_IIBC	333.711	0.572335	0.104362	5.48414	4.15489e-08	7.19907e-07	507	387	344	477	240	358	302	244	378	283	283	296
CP039993_1770862_1771052	74.0328	1.18512	0.216426	5.47586	4.35387e-08	7.51902e-07	116	85	84	89	61	89	93	50	91	42	42	46
CP039994_67485_67775	13.036	6.84697	1.25352	5.46219	4.70298e-08	8.0953e-07	38	19	7	25	11	20	13	11	16	0	0	0
EA674_10185|2-oxo_acid_dehydrogenase_subunit_E2	3932.67	-0.499957	0.0915785	-5.45932	4.77957e-08	8.20024e-07	4993	3392	3707	4934	2042	4029	2636	2705	3538	6519	5762	5379
CP039993_3968087_3968259	107.64	-0.969467	0.177737	-5.45452	4.91063e-08	8.39766e-07	122	87	70	144	53	89	61	83	99	161	207	195
EA674_19320|DUF2786_domain-containing_protein	13.2853	6.73958	1.23838	5.44225	5.26118e-08	8.96793e-07	23	20	14	22	12	17	18	14	15	0	0	0
EA674_19655|conjugal_transfer_protein_TraF	11.6225	6.76924	1.24534	5.43565	5.45966e-08	9.25692e-07	29	15	15	18	11	12	13	12	13	0	0	0
EA674_19415|hypothetical_protein	11.3821	6.78089	1.24753	5.43544	5.46599e-08	9.25692e-07	26	18	15	27	8	21	3	14	8	0	0	0
EA674_11105|hypothetical_protein	23.1724	-1.98834	0.366039	-5.43204	5.57149e-08	9.40525e-07	19	12	18	17	5	10	12	6	9	61	49	94
EA674_07670|TetR/AcrR_family_transcriptional_regulator	22.9435	-2.0324	0.374249	-5.43061	5.61611e-08	9.45019e-07	14	12	19	24	11	13	5	4	10	64	63	67
CP039993_2283527_2283650	107.427	-0.897334	0.165567	-5.41978	5.96735e-08	1.00091e-06	137	100	78	121	47	86	56	79	71	198	191	216
EA674_14340|betaine-aldehyde_dehydrogenase	4499.28	0.44191	0.0815626	5.41805	6.02542e-08	1.00743e-06	6601	5086	5368	5794	3138	4691	3921	2943	4855	4729	4130	4211
EA674_19425|hypothetical_protein	14.123	6.78328	1.2522	5.41707	6.05825e-08	1.00971e-06	15	20	22	35	8	11	20	13	24	0	0	0
EA674_16585|TonB-dependent_siderophore_receptor	872.775	0.621317	0.114961	5.40458	6.49608e-08	1.07925e-06	1154	1088	1014	1201	748	877	714	666	916	826	678	714
EA674_12775|phage_head_morphogenesis_protein	55.5406	-1.29263	0.239592	-5.39514	6.84704e-08	1.13397e-06	65	34	40	40	24	45	30	35	51	100	113	138
EA674_19620|type_IV_secretion_system_protein_TraC	10.3836	6.76121	1.25491	5.38782	7.13161e-08	1.17739e-06	25	16	17	12	8	6	10	10	20	0	0	0
CP039993_1914061_1914170	21.3267	2.67423	0.498455	5.36504	8.09325e-08	1.33196e-06	59	29	20	22	13	39	14	26	21	3	8	6
EA674_06625|GatB/YqeY_domain-containing_protein	7677.95	0.373081	0.0697985	5.34512	9.03587e-08	1.48245e-06	9905	8788	7768	9864	6315	7704	7467	5397	8778	7076	6944	7310
EA674_03950|bifunctional_methylenetetrahydrofolate_dehydrogenase/methenyltetrahydrofolate_cyclohydrolase	765.498	0.494392	0.0926802	5.33439	9.58665e-08	1.56791e-06	1231	894	812	996	563	779	682	497	839	790	645	716
EA674_05295|adenylosuccinate_lyase	1213.35	0.48354	0.0908314	5.3235	1.01792e-07	1.65965e-06	1902	1311	1315	1800	895	1254	977	884	1294	1214	1045	1082
EA714_006990|RNA_chaperone_Hfq	981.902	0.43454	0.0818055	5.31187	1.08505e-07	1.76362e-06	1480	1168	1155	1190	702	980	871	638	991	996	939	993
CP039993_3263114_3263282	546.778	-0.624953	0.117762	-5.30693	1.11488e-07	1.80651e-06	601	516	477	633	268	533	383	422	478	678	916	977
EA674_19365|hypothetical_protein	13.0915	6.63879	1.25453	5.29184	1.21094e-07	1.95614e-06	32	14	9	27	8	16	18	19	13	0	0	0
EA674_19440|hypothetical_protein	10.1729	6.75312	1.27697	5.28839	1.234e-07	1.98727e-06	23	29	6	22	9	15	6	9	6	0	0	0
CP039993_3256172_3256529	129.785	-0.833283	0.157888	-5.2777	1.30817e-07	2.10028e-06	130	110	114	163	82	101	88	72	122	234	205	219
EA674_14285|poly-beta-1,6-N-acetyl-D-glucosamine_N-deacetylase_PgaB	241.605	-0.636201	0.120585	-5.27594	1.32076e-07	2.1054e-06	278	223	188	291	156	221	180	167	211	348	393	368
CP039993_197522_197897	88.7826	-0.99668	0.188911	-5.27593	1.32083e-07	2.1054e-06	122	68	63	101	39	77	44	59	58	194	151	171
CP039993_787305_787587	30.8646	-1.71617	0.325304	-5.27558	1.32339e-07	2.1054e-06	20	22	22	23	16	21	21	12	19	94	49	78
CP039994_42254_42534	11.7272	6.59234	1.25181	5.26625	1.39239e-07	2.20847e-06	25	12	15	28	7	16	11	19	7	0	0	0
EA674_03035|VOC_family_protein	90.9864	-0.918566	0.174631	-5.26003	1.44028e-07	2.27756e-06	116	85	77	89	38	63	40	56	70	168	182	194
EA714_014075|hypothetical_protein	21.4676	-1.93222	0.368828	-5.23882	1.6161e-07	2.5479e-06	16	15	14	9	7	17	12	5	9	65	56	58
EA674_03510|DcaP-like_protein	1752.48	-0.37073	0.0707757	-5.2381	1.6224e-07	2.54981e-06	2226	1760	1567	2255	1010	1644	1258	1219	1637	2543	2442	2452
EA674_03800|neutral_zinc_metallopeptidase	234.463	-0.631475	0.120566	-5.23757	1.62702e-07	2.54981e-06	276	210	203	281	123	214	181	156	206	369	331	409
EA674_10205|transcriptional_regulator	271.045	-0.686524	0.131143	-5.23492	1.65057e-07	2.57901e-06	323	241	209	369	134	258	194	175	253	453	460	368
EA674_14155|galactose_mutarotase	148.101	-0.783497	0.149773	-5.23123	1.68385e-07	2.62322e-06	157	115	140	168	95	136	97	93	123	226	235	280
EA674_19240|50S_ribosomal_protein_L34	1316.73	0.4061	0.0780181	5.2052	1.93792e-07	3.01009e-06	1868	1490	1408	1753	1030	1288	1206	832	1547	1290	1217	1229
EA674_18665|ribonuclease_E_inhibitor_RraB	202.682	-0.712796	0.136987	-5.20337	1.95709e-07	3.03089e-06	251	174	173	282	108	153	124	140	163	343	314	357
EA674_02030|DUF853_domain-containing_protein	212.198	-0.669504	0.128789	-5.19847	2.00932e-07	3.10262e-06	248	193	184	201	135	200	139	129	206	350	329	353
EA674_19710|hypothetical_protein	9.52895	6.61483	1.27275	5.19725	2.02255e-07	3.1139e-06	26	12	15	8	4	18	10	8	15	0	0	0
EA674_18735|Fe/S-dependent_2-methylisocitrate_dehydratase_AcnD	828.156	-0.549834	0.105823	-5.1958	2.03844e-07	3.12918e-06	1030	804	798	1020	426	732	515	509	693	1548	1260	1187
EA674_15935|acetyl-CoA_carboxylase_carboxyltransferase_subunit_alpha	1357.24	0.44885	0.0864078	5.19455	2.05211e-07	3.14099e-06	1927	1695	1382	1800	1025	1463	1120	1000	1427	1345	1227	1235
EA674_00935|BCCT_family_transporter	288.734	-0.644647	0.124317	-5.18549	2.15445e-07	3.28805e-06	343	247	253	358	153	283	214	154	293	440	399	531
EA674_13985|lysine--tRNA_ligase	1385.7	0.390871	0.0754347	5.18159	2.20007e-07	3.34793e-06	2035	1523	1425	1891	1075	1381	1216	955	1584	1363	1249	1321
CP039993_3837507_3837626	116.903	-0.892827	0.172466	-5.17682	2.25703e-07	3.42468e-06	121	95	117	115	59	87	67	76	101	243	198	205
EA674_13995|SRPBCC_domain-containing_protein	84.3402	-0.972557	0.187893	-5.17612	2.26552e-07	3.42766e-06	84	61	76	83	43	77	64	48	79	140	161	151
EA674_08710|TonB-dependent_siderophore_receptor	221.979	0.661683	0.12794	5.17182	2.31824e-07	3.49735e-06	324	280	263	320	154	258	176	174	207	201	188	182
EA674_17155|DNA-binding_protein	191.876	-0.807754	0.156877	-5.14897	2.61919e-07	3.94005e-06	258	154	147	240	69	175	122	135	164	282	310	415
EA674_12700|type_I_secretion_system_permease/ATPase	187.007	-0.681954	0.132528	-5.14575	2.66447e-07	3.99671e-06	219	163	179	227	98	147	138	109	158	312	293	332
EA674_16580|trigger_factor	3781.74	0.365441	0.0713868	5.11918	3.06874e-07	4.59e-06	5683	4275	3804	5155	2759	3853	3340	2694	3983	3849	3577	3599
EA674_11040|transketolase	3894.38	0.324063	0.0634968	5.1036	3.33247e-07	4.97031e-06	5556	4426	4097	5154	2637	3800	3509	2762	4381	3951	3750	3980
EA674_16475|nucleoside-diphosphate_kinase	1646.09	0.448402	0.0880172	5.09448	3.49703e-07	5.20097e-06	2350	1958	1800	2214	1288	1637	1503	1081	1703	1679	1451	1526
CP039993_3775561_3775614	116.434	0.993421	0.195179	5.08981	3.58425e-07	5.31504e-06	151	152	106	183	87	117	124	115	147	54	87	73
EA674_01255|imidazoleglycerol-phosphate_dehydratase_HisB	488.492	0.480771	0.094467	5.08929	3.59398e-07	5.31504e-06	735	526	529	659	329	557	414	397	524	442	427	460
EA674_19600|conjugal_transfer_protein_TraB	10.0812	6.4007	1.25911	5.08351	3.70528e-07	5.46425e-06	18	15	12	14	10	18	9	6	18	0	0	0
EA674_19675|lytic_transglycosylase_domain-containing_protein	7.35645	6.59433	1.29982	5.07327	3.91044e-07	5.75064e-06	18	19	14	12	0	9	4	5	13	0	0	0
EA674_08410|ABC_transporter_ATP-binding_protein	426.468	0.512917	0.101441	5.05632	4.2743e-07	6.26817e-06	664	515	468	573	289	427	338	329	463	428	384	383
CP039993_1439581_1439957	322.537	0.672066	0.132961	5.05461	4.3127e-07	6.30687e-06	440	375	316	394	297	397	297	257	363	247	209	283
EA674_13830|META_domain-containing_protein	1775.59	0.469617	0.0929185	5.05407	4.32484e-07	6.30706e-06	2323	1888	1968	2317	1355	1957	1807	1265	2034	1321	1558	1800
EA674_08740|ribose-5-phosphate_isomerase_RpiA	564.441	0.469324	0.093043	5.04416	4.55514e-07	6.62452e-06	789	670	652	766	371	585	458	420	652	505	539	548
EA674_11820|AMP-binding_protein	827.868	-0.62874	0.124993	-5.03019	4.89994e-07	7.10627e-06	1027	772	590	1159	342	870	513	608	868	1126	1316	1358
EA674_09860|hypothetical_protein	2777.46	-0.441555	0.0878114	-5.02845	4.94466e-07	7.15137e-06	3027	2599	2660	2978	1840	2514	2523	1711	2794	3503	3919	4400
EA674_09415|calcium-binding_protein	52.7755	-1.18008	0.234871	-5.02439	5.05032e-07	7.28411e-06	42	44	50	47	24	33	32	33	43	100	107	118
EA674_13100|aspartate_kinase	2771.29	0.411311	0.0819975	5.01614	5.27194e-07	7.58293e-06	4437	2991	2913	3999	1794	3026	2160	2124	2925	2916	2473	2609
EA674_08580|hypothetical_protein	529.627	-0.494859	0.0987329	-5.0121	5.38386e-07	7.72275e-06	716	472	450	682	273	519	373	380	456	713	844	820
CP039993_1299981_1300118	1444.1	0.42957	0.085731	5.01067	5.42402e-07	7.75915e-06	2014	1689	1494	1978	1091	1594	1250	1095	1460	1392	1355	1259
EA674_14990|aspartate_1-decarboxylase	753.539	0.494125	0.0987708	5.00274	5.65218e-07	8.06358e-06	1179	842	882	1088	526	770	592	549	757	796	629	711
EA674_03520|DNA-binding_response_regulator_PmrA	52.5659	-1.15396	0.231311	-4.98877	6.07639e-07	8.64527e-06	57	43	40	48	32	33	27	28	42	109	119	94
EA674_00360|amino_acid_permease	157.789	-0.734349	0.14729	-4.98574	6.1726e-07	8.75842e-06	186	153	108	190	88	142	103	103	157	276	242	249
EA674_07570|transaldolase	666.473	-0.455737	0.0915074	-4.98033	6.34754e-07	8.98236e-06	801	644	593	779	372	618	493	465	689	866	970	1073
EA674_00460|6,7-dimethyl-8-ribityllumazine_synthase	1114.9	0.369418	0.0742528	4.97514	6.5199e-07	9.20148e-06	1558	1233	1172	1488	796	1182	994	809	1265	1096	1002	1090
EA674_05890|phage_head_morphogenesis_protein	27.4137	-1.65148	0.332321	-4.96954	6.71114e-07	9.44597e-06	29	15	14	19	11	27	19	15	18	64	67	55
EA674_07220|outer_membrane_protein_assembly_factor	407.249	-0.586294	0.118002	-4.9685	6.74743e-07	9.47166e-06	477	370	351	456	201	381	305	285	432	530	677	662
EA674_11165|PACE_efflux_transporter	11.8386	-2.70954	0.546013	-4.96242	6.96211e-07	9.74696e-06	6	7	3	4	5	6	7	4	5	21	44	44
EA674_19350|SAM-dependent_DNA_methyltransferase	9.69427	6.32343	1.27508	4.95922	7.07758e-07	9.86682e-06	15	9	18	13	5	19	15	6	15	0	0	0
EA674_10595|Fe-S_protein_assembly_chaperone_HscA	836.271	0.395644	0.0797829	4.95901	7.08531e-07	9.86682e-06	1208	912	852	1203	628	906	701	597	940	766	748	828
EA674_04320|rhombotarget_A	326.821	-0.531437	0.107292	-4.95316	7.30166e-07	1.01412e-05	397	320	266	409	190	325	246	214	275	444	504	525
EA674_06150|NADP-dependent_malic_enzyme	1973.98	0.357647	0.0722265	4.95173	7.35552e-07	1.0189e-05	2777	2249	2039	2730	1420	2071	1696	1484	2065	1993	1847	1883
EA674_15035|ACP_S-malonyltransferase	1953.9	0.495345	0.100109	4.94805	7.49598e-07	1.03513e-05	2608	2570	1994	2643	1615	1981	1670	1420	2017	1880	1659	1774
CP039994_24440_24696	10.0158	6.32201	1.27778	4.94763	7.51209e-07	1.03513e-05	8	18	15	18	8	14	8	6	24	0	0	0
EA674_05265|phosphate_ABC_transporter_permease_subunit_PstC	111.406	0.829816	0.167745	4.94689	7.5408e-07	1.03637e-05	172	142	141	147	73	131	91	93	108	90	80	97
EA674_01535|LemA_family_protein	163.19	-0.703366	0.142421	-4.93865	7.86648e-07	1.07629e-05	222	136	141	179	75	142	100	119	129	255	276	307
EA674_11050|hypothetical_protein	156.214	-0.750088	0.151886	-4.93851	7.87227e-07	1.07629e-05	210	138	122	172	77	151	95	75	155	251	262	301
EA674_00185|molecular_chaperone_DnaJ	585.946	0.498086	0.101025	4.93035	8.20835e-07	1.11932e-05	943	681	611	862	330	664	444	459	669	488	537	611
EA674_06380|U32_family_peptidase	311.753	0.582472	0.118308	4.92333	8.50819e-07	1.1572e-05	493	333	360	500	210	360	235	236	317	234	271	317
EA674_08240|30S_ribosomal_protein_S12_methylthiotransferase_RimO	1422.17	0.391153	0.0795486	4.91715	8.78111e-07	1.19124e-05	1981	1564	1560	1869	1039	1492	1329	968	1588	1397	1204	1456
CP039994_22939_23007	8.30649	6.29217	1.27977	4.91664	8.80427e-07	1.1913e-05	23	14	6	16	6	17	4	8	9	0	0	0
EA674_03885|glutamine-hydrolyzing_carbamoyl-phosphate_synthase_small_subunit	4380.35	0.36922	0.0751623	4.91229	9.00165e-07	1.21488e-05	5913	4901	4933	5531	3385	4265	4132	2836	4972	4444	3910	4389
EA674_06595|CvpA_family_protein	313.164	0.56416	0.115013	4.90519	9.33379e-07	1.25647e-05	456	369	348	380	217	338	289	215	401	281	242	303
EA674_18960|YciK_family_oxidoreductase	198.396	-0.703573	0.144114	-4.88206	1.04986e-06	1.40966e-05	251	173	151	307	95	204	123	113	167	347	303	313
CP039993_1218080_1218194	9.79429	6.2664	1.28369	4.88155	1.05255e-06	1.40967e-05	23	7	12	24	9	21	11	3	11	0	0	0
CP039993_3081230_3081361	512.87	0.506494	0.103924	4.87369	1.09534e-06	1.46325e-05	766	551	580	752	373	517	470	360	553	500	404	482
EA674_10215|GGDEF_domain-containing_protein	121.982	-0.80356	0.164928	-4.87217	1.10377e-06	1.46657e-05	157	104	96	124	55	127	88	74	89	217	221	203
EA674_08225|nitrogen_regulation_protein_NR(I)	390.228	-0.553192	0.113545	-4.87199	1.10481e-06	1.46657e-05	392	351	363	459	259	346	329	213	451	604	530	566
CP039993_3231821_3231877	461.32	0.722202	0.148243	4.87174	1.10621e-06	1.46657e-05	667	689	510	571	422	448	323	363	429	419	370	393
EA674_03880|carbamoyl-phosphate_synthase_large_subunit	7777.64	0.363698	0.0746774	4.87025	1.11457e-06	1.47393e-05	11005	8658	8357	10703	5725	7925	6823	5353	8497	8108	7317	7177
CP039993_1697647_1697698	511.503	0.520228	0.106833	4.86954	1.11858e-06	1.47551e-05	722	559	541	687	429	591	485	359	530	432	393	497
EA674_03340|DJ-1/PfpI_family_protein	60.4975	-1.03383	0.212366	-4.86814	1.12656e-06	1.48232e-05	80	48	41	52	31	45	39	34	51	112	119	124
EA674_06395|ferredoxin--NADP_reductase	349.523	0.496863	0.102315	4.85619	1.19665e-06	1.5706e-05	521	404	385	482	249	360	294	258	384	327	301	336
EA674_16540|phosphogluconate_dehydratase	732.694	-0.420274	0.0866931	-4.84784	1.24814e-06	1.63197e-05	963	744	648	854	442	685	503	448	691	1154	1012	1093
EA674_10590|Fe-S_protein_assembly_co-chaperone_HscB	459.239	0.486576	0.100376	4.84754	1.25004e-06	1.63197e-05	684	558	467	613	328	512	369	365	480	411	445	407
EA674_03720|rhodanese-related_sulfurtransferase	714.32	0.458123	0.0945147	4.84711	1.25273e-06	1.63197e-05	1043	829	695	963	539	728	648	566	785	556	687	693
EA674_01405|amino_acid_permease	280.665	0.592355	0.122262	4.84497	1.26633e-06	1.6456e-05	450	367	280	406	207	286	240	199	277	266	226	260
CP039993_3942774_3943163	3530.72	0.540458	0.11162	4.84193	1.28582e-06	1.66626e-05	5019	4394	3136	4794	2980	3777	3366	2728	3743	2390	3346	3200
EA674_15175|heme_utilization_protein	225.319	-0.626838	0.129472	-4.84151	1.28857e-06	1.66626e-05	306	203	162	241	139	209	174	131	216	324	369	370
CP039993_674940_675122	357.111	0.655129	0.135406	4.83825	1.30985e-06	1.6896e-05	480	462	401	446	309	396	286	304	337	269	303	322
EA674_05035|hypothetical_protein	137.409	-0.782087	0.161741	-4.83542	1.32868e-06	1.7097e-05	160	106	129	183	62	115	71	98	127	214	224	269
EA674_19410|hypothetical_protein	8.47088	6.16574	1.27723	4.82744	1.38296e-06	1.77519e-05	19	14	6	15	4	16	6	11	12	0	0	0
EA674_10915|hypothetical_protein	100.917	0.89464	0.185479	4.82339	1.41139e-06	1.80726e-05	147	111	106	154	92	119	102	75	108	75	59	69
CP039993_1603601_1603924	23.207	-1.78025	0.369141	-4.82269	1.41632e-06	1.80916e-05	17	20	15	10	11	9	15	10	7	61	46	81
EA674_01690|phosphoglycerate_dehydrogenase	2339.13	0.336625	0.0698371	4.82015	1.43449e-06	1.82793e-05	3440	2540	2466	3260	1650	2440	1960	1728	2437	2411	2193	2321
EA674_12145|phenylacetate--CoA_ligase	2935.13	0.563172	0.117036	4.81195	1.49461e-06	1.89993e-05	3462	3194	3815	3673	2597	2629	3299	1756	3412	2549	2330	2642
EA674_18040|hypothetical_protein	1102.87	-0.435308	0.0904991	-4.81008	1.50871e-06	1.91322e-05	1188	1012	1006	1280	742	969	1028	764	1100	1435	1530	1569
EA674_03300|hypothetical_protein	360.903	0.538401	0.111962	4.80877	1.51861e-06	1.92113e-05	468	435	385	487	291	378	317	288	404	298	286	344
EA674_04305|phosphoribosylformylglycinamidine_cyclo-ligase	1519.54	0.385628	0.0805733	4.78605	1.70093e-06	2.14661e-05	2312	1751	1527	2093	1121	1580	1302	998	1667	1563	1391	1463
EA674_02305|xanthine_phosphoribosyltransferase	570.399	0.436195	0.0912018	4.78274	1.7292e-06	2.17594e-05	863	612	627	800	382	637	466	438	603	564	501	544
EA674_14815|protoporphyrinogen_oxidase_HemJ	295.465	0.593367	0.124082	4.78206	1.73506e-06	2.17594e-05	477	359	303	423	232	285	212	230	337	266	254	259
CP039993_1429916_1430344	41.6757	1.35931	0.284263	4.78188	1.73661e-06	2.17594e-05	62	60	50	48	32	42	56	30	48	22	24	24
EA674_18930|ferredoxin_reductase	15.9814	-2.3172	0.484635	-4.78133	1.74137e-06	2.17671e-05	9	9	7	14	12	8	3	11	3	50	31	49
EA674_15235|methionine--tRNA_ligase	746.434	0.380721	0.07967	4.77872	1.7641e-06	2.19989e-05	1091	848	780	984	502	794	634	563	833	705	698	764
EA674_01235|1-(5-phosphoribosyl)-5-((5-_phosphoribosylamino)methylideneamino)imidazole-4-_carboxamide_isomerase	333.1	0.535349	0.112168	4.77275	1.81729e-06	2.26085e-05	495	406	345	532	212	358	268	247	375	309	271	312
EA674_19580|hypothetical_protein	7.8478	6.12332	1.2858	4.76228	1.9142e-06	2.37578e-05	15	9	13	20	6	12	10	6	4	0	0	0
EA674_03635|50S_ribosomal_protein_L27	2611.58	0.344763	0.0724146	4.76096	1.92677e-06	2.38575e-05	3751	3124	2646	3341	1921	2657	2248	1859	2785	2689	2538	2546
EA674_12950|peroxiredoxin	4596.82	0.291605	0.0612641	4.7598	1.93787e-06	2.39383e-05	6422	5068	5015	5908	3099	4702	4061	3279	5040	4500	4597	4953
EA674_06085|type_I_glutamate--ammonia_ligase	2697.21	0.375586	0.0789286	4.75855	1.94989e-06	2.40304e-05	3997	2803	3030	3688	1813	2872	2305	1939	2985	2805	2419	2631
EA674_04300|phosphoribosylglycinamide_formyltransferase	566.496	0.453349	0.0953029	4.75693	1.96557e-06	2.41508e-05	844	696	566	758	431	549	534	367	626	555	498	540
CP039993_201395_201578	274.802	-0.629978	0.132443	-4.75659	1.96887e-06	2.41508e-05	354	212	205	365	152	316	150	219	271	416	393	414
EA674_09005|aromatic_ring-hydroxylating_dioxygenase_subunit_alpha	100.046	-0.87013	0.183039	-4.75379	1.99639e-06	2.44313e-05	125	79	77	113	46	87	71	47	110	191	171	166
CP039993_1527463_1527631	327.567	0.550791	0.116004	4.74803	2.05403e-06	2.50782e-05	436	418	360	470	244	370	279	239	329	282	300	284
EA674_09290|potassium_transporter	165.317	-0.719764	0.151809	-4.74123	2.1242e-06	2.58748e-05	157	138	168	146	107	141	144	89	167	253	272	277
EA674_01775|Glu/Leu/Phe/Val_dehydrogenase	2341.51	-0.408425	0.0861896	-4.73868	2.15116e-06	2.61425e-05	2832	2464	2024	2909	1463	2178	1698	1611	2050	3660	3213	3206
EA674_05990|hypothetical_protein	34.9209	-1.3444	0.283791	-4.73729	2.166e-06	2.62621e-05	31	21	31	51	12	30	14	28	14	67	79	74
EA674_19450|hypothetical_protein	8.05872	6.12596	1.29409	4.73381	2.20345e-06	2.66243e-05	13	16	8	14	4	12	2	14	13	0	0	0
EA674_13580|hypothetical_protein	13.2127	-2.46632	0.521027	-4.73357	2.20601e-06	2.66243e-05	5	7	6	18	3	12	10	4	5	35	43	26
EA674_16700|TonB_family_protein	463.705	0.484336	0.102543	4.72326	2.32093e-06	2.79469e-05	609	537	489	616	361	490	442	348	526	430	358	432
EA674_00815|IMP_dehydrogenase	2563.77	0.350274	0.0742394	4.71816	2.37983e-06	2.85906e-05	3631	2860	2829	3463	1794	2618	2256	1748	2797	2704	2329	2574
EA674_16435|ribosome_biogenesis_GTPase_Der	718.462	0.415629	0.0881864	4.71308	2.44006e-06	2.92473e-05	961	843	796	974	509	762	635	505	799	701	660	674
CP039993_1127344_1127417	497.089	0.525378	0.111506	4.71165	2.45722e-06	2.93385e-05	630	601	604	659	377	556	410	371	515	462	421	458
EA674_03630|50S_ribosomal_protein_L21	11566.5	0.315	0.0668575	4.71151	2.45885e-06	2.93385e-05	15529	13341	11907	14834	8786	11881	10392	8252	12515	11529	11245	11367
EA674_15105|trehalose-6-phosphate_synthase	607.243	-0.643803	0.137073	-4.69677	2.64303e-06	3.14646e-05	542	503	640	523	494	472	570	303	629	854	858	1092
CP039994_27118_27256	6.22111	6.14197	1.31166	4.68261	2.83246e-06	3.36434e-05	16	16	6	14	2	9	1	7	8	0	0	0
EA674_14980|50S_ribosomal_protein_L25	3002.47	0.29631	0.0634636	4.66898	3.02696e-06	3.58726e-05	4287	3229	2909	4098	2231	3161	2658	2264	3231	2847	2899	3035
EA674_14110|inorganic_phosphate_transporter	662.969	0.411507	0.0883626	4.65702	3.20813e-06	3.7934e-05	943	783	679	886	507	717	563	472	707	642	608	627
EA674_03795|DUF808_domain-containing_protein	229.913	-0.616594	0.132517	-4.65293	3.27245e-06	3.86076e-05	304	177	194	284	124	223	183	134	224	313	367	386
CP039993_2706823_2706888	1028.54	0.381388	0.0821634	4.64182	3.4536e-06	4.06533e-05	1541	1102	1078	1387	726	1151	870	749	1112	1010	1001	940
CP039994_28465_28516	6.95793	6.00939	1.29707	4.63305	3.6032e-06	4.23195e-05	12	12	10	15	7	8	4	3	14	0	0	0
CP039993_2506424_2506477	799.817	0.620926	0.134153	4.6285	3.68315e-06	4.31619e-05	916	925	1060	961	652	695	996	460	957	615	654	740
EA674_16250|ketol-acid_reductoisomerase	1484.47	0.401356	0.0868157	4.62309	3.7807e-06	4.42064e-05	2339	1571	1457	2152	1085	1605	1199	1117	1618	1484	1348	1339
EA674_18920|ribonuclease_PH	303.68	0.558047	0.120828	4.61853	3.86464e-06	4.50875e-05	460	369	306	405	233	305	261	231	349	305	238	254
EA674_09550|hypothetical_protein	59.7435	-1.10415	0.239102	-4.61792	3.87601e-06	4.51199e-05	51	54	39	78	30	63	49	25	51	84	112	128
EA674_06710|PIG-L_family_deacetylase	18.8076	-1.81309	0.3927	-4.61699	3.8935e-06	4.52232e-05	15	15	8	19	5	16	6	12	13	37	41	61
EA674_08215|ornithine_carbamoyltransferase	586.253	0.425365	0.0921583	4.6156	3.91968e-06	4.54267e-05	870	622	561	843	379	699	518	485	652	515	534	528
EA674_02925|bifunctional_tetrahydrofolate_synthase/dihydrofolate_synthase	482.88	0.459544	0.0997575	4.60661	4.09294e-06	4.73302e-05	674	628	504	628	346	509	392	364	516	453	458	457
EA674_15815|UDP-N-acetylglucosamine_1-carboxyvinyltransferase	1505.54	0.323689	0.0703086	4.60384	4.14777e-06	4.78589e-05	2226	1682	1554	1955	1061	1516	1244	1100	1706	1530	1457	1531
CP039993_69731_70253	106.59	-0.842048	0.183311	-4.59354	4.35784e-06	5.01725e-05	120	117	76	114	40	106	62	63	90	223	178	180
EA674_03975|glycerol-3-phosphate_dehydrogenase	67.6473	-0.992937	0.216557	-4.58511	4.53748e-06	5.21264e-05	98	44	52	67	29	60	38	44	47	110	133	152
EA674_11215|amino_acid_ABC_transporter_ATP-binding_protein	259.374	-0.695455	0.151728	-4.58358	4.57081e-06	5.23946e-05	392	210	185	302	120	259	149	161	259	430	449	412
EA714_011145|hypothetical_protein	16.0532	-2.15232	0.470275	-4.57673	4.72307e-06	5.4022e-05	2	13	13	15	3	10	8	5	8	48	44	43
EA674_06960|tRNA_uridine-5-carboxymethylaminomethyl(34)_synthesis_enzyme_MnmG	2258.56	0.362588	0.0793221	4.57108	4.85213e-06	5.53776e-05	3164	2465	2526	2744	1798	2095	2258	1366	2605	2328	2046	2231
EA674_17035|HopJ_type_III_effector_protein	221.206	0.603371	0.132239	4.56274	5.04907e-06	5.75003e-05	325	263	249	303	175	235	197	172	206	201	175	197
EA674_15030|3-oxoacyl-ACP_reductase_FabG	3185.93	0.387025	0.0849962	4.55343	5.27777e-06	5.99746e-05	4267	3883	3230	4058	2485	3281	2798	2447	3336	3157	2887	3025
EA674_12695|HlyD_family_type_I_secretion_periplasmic_adaptor_subunit	116.371	-0.727705	0.160122	-4.54468	5.50197e-06	6.23873e-05	141	97	108	149	58	93	72	70	104	202	196	196
EA674_00300|phosphoribosylaminoimidazolesuccinocarboxamide_synthase	1159.69	0.355047	0.078434	4.5267	5.9911e-06	6.77872e-05	1699	1222	1149	1692	857	1247	974	876	1263	1103	1109	1073
EA674_14325|choline_transporter	793.026	0.404774	0.0894554	4.52487	6.04337e-06	6.81831e-05	1091	970	882	903	572	778	779	523	886	753	784	784
EA674_10255|hypothetical_protein	232.361	-0.647208	0.143043	-4.52456	6.05206e-06	6.81831e-05	248	187	219	247	144	202	192	180	196	363	309	399
EA674_10910|fructose-bisphosphate_aldolase_class_II	1586.38	0.407666	0.0901118	4.524	6.06826e-06	6.82192e-05	2529	1763	1588	2114	1155	1688	1314	1100	1784	1686	1430	1436
EA674_19460|hypothetical_protein	6.70814	5.82529	1.2899	4.51606	6.29999e-06	7.0673e-05	11	10	9	12	6	8	5	8	10	0	0	0
CP039993_3080232_3080331	2104.24	0.319149	0.0707878	4.50853	6.52779e-06	7.2928e-05	2839	2357	2087	2889	1615	2215	1782	1612	2293	1937	2050	2082
CP039993_519341_519396	3563.22	0.496094	0.110035	4.5085	6.52879e-06	7.2928e-05	4346	4525	4184	4305	2923	3288	3319	2742	3691	3336	2988	3461
EA674_00390|urocanate_hydratase	1246.17	0.405437	0.0899662	4.50655	6.58895e-06	7.34438e-05	1546	1326	1353	1778	1001	1288	1243	810	1494	1146	1045	1150
CP039993_807718_807805	362.34	0.506934	0.112993	4.48643	7.24269e-06	8.05596e-05	523	412	375	557	241	373	275	314	432	310	328	318
EA674_10175|acetoin_reductase	899.484	-0.500189	0.11152	-4.48521	7.28416e-06	8.08496e-05	1150	767	882	1101	500	881	589	598	787	1614	1219	1261
EA674_02915|tryptophan_synthase_subunit_alpha	2031.46	0.357397	0.0797766	4.47998	7.46516e-06	8.26379e-05	2674	2475	2102	2823	1385	2209	1649	1533	2237	2072	1868	1968
EA674_05065|hypothetical_protein	56.2295	-1.01837	0.227334	-4.47964	7.47676e-06	8.26379e-05	65	45	44	52	22	50	43	37	37	112	111	99
EA674_07385|alpha/beta_hydrolase	122.617	-0.762714	0.170387	-4.47636	7.59263e-06	8.37423e-05	141	81	108	150	79	102	98	67	137	162	214	204
EA674_15780|hypothetical_protein	84.3327	-0.857739	0.191725	-4.4738	7.6843e-06	8.45756e-05	73	86	69	72	53	63	75	44	85	150	129	155
CP039993_3505916_3506148	449.717	0.530427	0.118686	4.46915	7.85327e-06	8.60763e-05	672	592	476	561	379	469	342	326	436	440	397	414
CP039993_2428435_2428519	381.74	-0.595163	0.133172	-4.46914	7.85344e-06	8.60763e-05	342	329	384	364	289	324	369	198	417	590	494	603
EA674_16690|biopolymer_transporter_ExbD	318.561	0.60114	0.134555	4.46761	7.9098e-06	8.65135e-05	467	399	297	445	283	350	270	225	352	290	274	227
EA674_00715|orotate_phosphoribosyltransferase	221.497	0.604522	0.135452	4.46301	8.08147e-06	8.82073e-05	373	227	253	329	165	227	174	176	227	168	204	207
EA674_19140|5-(carboxyamino)imidazole_ribonucleotide_mutase	603.935	0.402256	0.0901401	4.46257	8.09827e-06	8.82073e-05	940	662	653	861	383	639	481	460	644	587	605	571
EA674_12345|type_VI_secretion_system_ATPase_TssH	25.9202	-1.49848	0.335913	-4.4609	8.16154e-06	8.87124e-05	24	22	9	30	9	23	17	20	19	47	56	57
EA674_18470|glutamine-hydrolyzing_GMP_synthase	2158.42	0.348678	0.0781775	4.46009	8.19255e-06	8.88655e-05	3063	2566	2144	2762	1646	2159	1975	1469	2365	2235	2054	2036
EA674_12730|KpsF/GutQ_family_sugar-phosphate_isomerase	481.655	0.424714	0.0952403	4.4594	8.21912e-06	8.89699e-05	744	577	512	661	329	456	407	367	481	454	466	495
EA674_04465|2,3,4,5-tetrahydropyridine-2,6-dicarboxylate_N-succinyltransferase	1594.65	0.348945	0.0784081	4.45037	8.57225e-06	9.26015e-05	2202	1773	1637	2080	1293	1515	1572	1079	1736	1534	1436	1612
CP039993_2534235_2534348	32.9655	-2.8212	0.634225	-4.44826	8.65684e-06	9.31507e-05	36	7	5	25	6	11	15	3	21	101	111	112
EA674_05955|phage_tail_protein	19.5158	-1.80336	0.405412	-4.44822	8.65858e-06	9.31507e-05	17	11	9	21	16	14	7	6	18	33	53	47
EA674_03780|ADP-forming_succinate--CoA_ligase_subunit_beta	4739.13	0.302829	0.0680931	4.44728	8.69658e-06	9.33682e-05	6329	5125	4918	6658	3355	5069	4215	3542	5143	4798	4510	4498
EA674_09555|hypothetical_protein	31.6956	-1.32964	0.299358	-4.44163	8.928e-06	9.55041e-05	27	25	22	26	18	25	24	17	24	49	77	68
CP039993_265802_265904	355.154	0.540621	0.121729	4.4412	8.94589e-06	9.55041e-05	583	400	448	479	178	410	274	269	369	370	330	319
EA674_08530|universal_stress_protein	172.995	-0.636524	0.143326	-4.4411	8.9501e-06	9.55041e-05	241	142	150	232	89	161	87	118	142	254	293	306
CP039520_792476_793307	47.7218	-1.19529	0.269245	-4.43942	9.02005e-06	9.59753e-05	36	33	46	34	31	35	44	22	38	114	83	80
EA674_13140|NAD(P)/FAD-dependent_oxidoreductase	6.87203	5.75219	1.29578	4.43917	9.03082e-06	9.59753e-05	13	10	6	14	7	14	6	4	9	0	0	0
EA674_08370|S8_family_peptidase	76.1345	-0.91551	0.20656	-4.43218	9.32851e-06	9.89388e-05	63	73	60	82	38	68	69	40	78	110	130	149
CP039993_1094654_1094794	451.4	-0.670567	0.151672	-4.42116	9.81724e-06	0.000103912	601	352	351	562	187	445	221	466	395	736	678	707
CP039993_3516376_3516511	172.908	0.613937	0.139081	4.41424	1.01367e-05	0.000107078	249	175	192	248	136	195	161	125	209	137	133	148
CP039993_2723842_2723971	10.2542	5.55339	1.25968	4.40859	1.04047e-05	0.000109688	21	16	12	17	6	18	9	6	20	1	0	0
CP039993_1636966_1637029	7.13241	5.74102	1.30331	4.40496	1.05802e-05	0.000111315	15	6	8	15	3	18	3	8	12	0	0	0
EA674_18580|MHS_family_MFS_transporter	166.449	-0.680882	0.154624	-4.40347	1.06534e-05	0.000111861	183	146	187	167	93	135	106	84	144	328	260	279
EA674_19455|hypothetical_protein	5.02937	5.79689	1.31975	4.3924	1.12105e-05	0.000117476	14	9	7	11	3	6	2	5	6	0	0	0
EA674_06190|lipoyl_synthase	851.521	0.359407	0.0818695	4.39	1.13351e-05	0.000118545	1283	967	898	1146	561	939	707	582	927	880	810	850
EA674_16450|histidine--tRNA_ligase	1095.61	0.32873	0.0749152	4.38802	1.14386e-05	0.000119257	1660	1193	1114	1557	721	1149	925	788	1204	1078	1054	1132
EA674_07945|alpha/beta_hydrolase	11.7685	3.34691	0.76277	4.38783	1.14486e-05	0.000119257	24	16	10	24	8	19	9	13	15	3	2	0
EA674_18660|ester_cyclase	158.33	-0.620864	0.141685	-4.382	1.17592e-05	0.000122249	198	131	143	190	76	143	121	109	140	251	249	251
CP039993_2954249_2954759	178.865	0.713229	0.163095	4.37308	1.22505e-05	0.000127105	227	225	193	254	162	157	213	119	189	123	129	161
EA674_04250|3-phosphoserine/phosphohydroxythreonine_transaminase	347.418	0.505565	0.115648	4.3716	1.2334e-05	0.000127719	603	378	364	509	225	392	250	250	389	316	304	354
CP039993_1379255_1379400	567.89	0.521804	0.119382	4.37089	1.23744e-05	0.000127885	843	701	684	689	458	598	452	356	577	628	480	508
EA674_02725|bifunctional_[glutamate--ammonia_ligase]-adenylyl-L-tyrosine_phosphorylase/[glutamate--ammonia-ligase]_adenylyltransferase	661.33	-0.416407	0.0957301	-4.3498	1.36262e-05	0.000140545	760	656	677	722	407	582	486	423	634	1028	905	991
CP039993_3941044_3941099	3544.82	0.459977	0.105828	4.34646	1.38353e-05	0.000142422	4384	4437	4093	4277	2949	3312	3202	2701	3678	3396	3108	3395
EA674_16145|NAD(P)_transhydrogenase_subunit_alpha	206.48	-0.567367	0.13065	-4.34266	1.40768e-05	0.000144625	255	184	208	252	119	182	131	108	189	346	312	339
EA674_13180|NAD(P)/FAD-dependent_oxidoreductase	5.18146	5.74158	1.32266	4.34094	1.41872e-05	0.000145474	9	9	10	4	9	4	5	2	7	0	0	0
EA674_00395|histidine_ammonia-lyase	626.477	0.468329	0.108031	4.33513	1.45673e-05	0.00014908	802	723	682	844	508	623	656	404	705	599	555	512
EA674_11100|biotin_synthase	696.64	0.398049	0.0919659	4.32822	1.50317e-05	0.000153313	1069	790	694	945	487	751	572	536	743	715	653	629
EA674_05060|hypothetical_protein	46.0801	-1.07117	0.24749	-4.32811	1.50392e-05	0.000153313	59	33	31	42	23	37	40	25	33	87	86	92
CP039993_3915920_3916093	7.63942	-3.87797	0.898141	-4.31778	1.57609e-05	0.000160358	3	1	0	9	1	7	5	8	5	25	9	26
EA674_19585|type_IV_conjugative_transfer_system_protein_TraL	6.26658	5.64514	1.30786	4.31631	1.58661e-05	0.000161116	13	7	7	10	11	6	7	4	7	0	0	0
EA674_08990|acyl-CoA_dehydrogenase	52.5792	-0.987021	0.229414	-4.30236	1.68989e-05	0.000171273	54	40	49	54	33	33	35	26	48	106	98	91
EA674_06470|dicarboxylate/amino_acid:cation_symporter	566.401	0.428939	0.0997548	4.29993	1.70853e-05	0.000172828	883	617	515	868	397	683	465	418	620	530	480	528
EA674_19465|hypothetical_protein	7.3254	5.58248	1.30368	4.28209	1.85147e-05	0.000186927	14	4	8	14	6	11	4	12	13	0	0	0
EA674_16035|acyl-CoA_synthetase	168.273	-0.764223	0.178622	-4.27844	1.88208e-05	0.000189653	199	132	128	213	68	173	75	162	177	259	276	268
EA674_17750|ferrous_iron_transporter_B	545.893	0.455245	0.106424	4.27763	1.88892e-05	0.000189978	806	679	599	761	392	509	492	378	532	582	485	512
CP039993_372004_373027	1085.52	-0.378499	0.0884973	-4.27695	1.89468e-05	0.000190192	1214	1182	953	1339	704	1042	826	734	988	1493	1531	1524
EA674_14690|phosphomannomutase/phosphoglucomutase	353.829	-0.520018	0.121762	-4.27077	1.94797e-05	0.000195169	475	305	312	360	184	354	261	264	318	495	515	607
CP039993_745731_745827	6334.76	0.312757	0.0734473	4.25825	2.06031e-05	0.000206031	8190	7577	6490	7969	4846	6387	5721	4588	6896	6170	6083	6483
CP039994_25355_25555	5.11755	5.64104	1.32601	4.25414	2.09856e-05	0.000209457	13	8	6	10	1	10	3	6	7	0	0	0
EA674_12295|winged_helix-turn-helix_domain-containing_protein	42.8131	-1.16158	0.273169	-4.25225	2.11631e-05	0.000210828	32	45	31	41	25	28	32	25	28	64	92	99
EA674_18775|transcriptional_regulator_LldR	45.4525	1.16271	0.273713	4.2479	2.15784e-05	0.000214558	97	57	48	78	31	69	25	38	33	38	25	29
EA674_16720|50S_ribosomal_protein_L28	7563.05	0.314749	0.074128	4.24602	2.17598e-05	0.000215953	10777	8687	7957	9642	5663	7697	6504	5353	7765	8109	7331	7438
EA674_15180|hypothetical_protein	131.106	-0.676273	0.159388	-4.24293	2.20623e-05	0.000218542	163	103	115	147	83	102	99	87	118	214	225	189
CP039993_1790444_1790551	70.0646	0.889093	0.209615	4.24155	2.21979e-05	0.000219471	113	82	88	107	45	76	63	62	64	51	46	62
CP039993_1638254_1638395	7.8402	5.52378	1.30449	4.23443	2.29136e-05	0.000226121	6	12	6	8	5	10	14	10	17	0	0	0
EA674_19195|hypoxanthine_phosphoribosyltransferase	246.406	0.633925	0.149921	4.2284	2.35356e-05	0.000231824	463	262	270	329	138	331	158	189	286	214	216	226
EA674_05370|50S_ribosomal_protein_L31	1860.62	0.322234	0.0763785	4.21891	2.45484e-05	0.000241346	2660	2154	1868	2478	1347	1921	1663	1311	1951	1938	1814	1783
EA674_07005|30S_ribosomal_protein_S18	11108.4	0.291583	0.0691305	4.21787	2.46626e-05	0.000242016	15397	12770	11202	14468	8235	11482	9651	7977	11836	11637	10919	10821
EA674_10795|enoyl-CoA_hydratase/isomerase_family_protein	872.457	0.337836	0.0802957	4.2074	2.58329e-05	0.000252948	1233	1023	902	1161	623	917	783	593	914	867	849	880
EA674_03985|diacylglycerol_kinase	33.1775	-1.26134	0.299817	-4.20705	2.5873e-05	0.000252948	35	25	24	35	15	39	15	10	27	61	66	82
CP039993_347268_347476	4738.85	0.329854	0.0784218	4.20615	2.59758e-05	0.000253482	6174	5735	4734	6248	3674	4838	4187	3347	5229	4676	4648	4482
EA674_13475|tape_measure_protein	60.8157	-0.912437	0.217388	-4.19728	2.70139e-05	0.000263123	69	52	48	55	41	39	51	35	45	94	116	120
EA674_17710|phosphomethylpyrimidine_synthase_ThiC	105.545	0.730331	0.174281	4.19055	2.78283e-05	0.000270553	177	139	105	144	69	109	83	82	134	86	84	92
EA674_06195|Si-specific_NAD(P)(+)_transhydrogenase	595.363	0.400595	0.0958963	4.17738	2.94889e-05	0.000286167	932	643	627	821	388	600	515	438	678	619	532	570
EA674_02890|tryptophan_synthase_subunit_beta	403.286	0.43588	0.104414	4.17454	2.98586e-05	0.000289221	626	471	476	533	242	431	330	251	458	386	388	435
CP039993_2952495_2952590	706.793	0.404806	0.0972068	4.16439	3.12192e-05	0.000301843	995	754	824	915	525	761	634	510	712	659	709	656
EA674_06880|sorbosone_dehydrogenase_family_protein	80.914	-0.898346	0.21581	-4.16266	3.14561e-05	0.000303575	61	71	89	89	41	62	53	54	62	130	165	143
EA674_05910|stress-responsive_nuclear_envelope_protein	15.5527	-1.84759	0.443918	-4.16201	3.15456e-05	0.00030388	12	10	9	6	10	16	5	5	12	36	39	41
EA674_12190|1,2-phenylacetyl-CoA_epoxidase_subunit_A	3352.89	-0.316363	0.0763221	-4.1451	3.39666e-05	0.000326602	4150	3062	3367	4653	1814	3434	2384	2397	3142	4691	4350	4677
EA674_05250|alpha-keto_acid_decarboxylase_family_protein	2374.11	-0.728818	0.176167	-4.13708	3.51754e-05	0.000337607	3266	1928	1730	3395	797	2677	1032	2119	1878	3794	3893	3976
EA674_05790|hypothetical_protein	18.633	-1.54154	0.373688	-4.1252	3.70405e-05	0.000354859	21	13	12	17	10	8	9	8	8	44	44	50
EA674_16220|peptide_chain_release_factor_3	526.665	0.408489	0.0991127	4.12146	3.76481e-05	0.000360022	810	591	528	751	372	527	495	371	549	522	492	485
EA674_10220|chorismate_synthase	510.106	0.393068	0.0954846	4.11656	3.84574e-05	0.000367093	793	583	523	737	331	558	397	362	561	519	483	491
EA674_15405|ribonucleoside-diphosphate_reductase_subunit_alpha	9158.26	0.285852	0.0695194	4.11183	3.92537e-05	0.000374014	13117	9783	9683	12028	6643	9362	8422	6007	10036	9706	8870	9122
EA674_12665|ferredoxin_family_protein	353.945	0.450552	0.109698	4.1072	4.00477e-05	0.000380889	570	385	372	506	218	423	264	266	394	338	332	331
EA674_17570|preprotein_translocase_subunit_SecE	3287.65	0.323891	0.0789139	4.10436	4.05441e-05	0.000384912	4168	3788	3480	4141	2675	3421	3016	2197	3642	3150	3086	3334
CP039993_3079079_3079170	202.928	0.594038	0.145207	4.09099	4.29541e-05	0.000407056	271	220	237	266	169	213	188	179	198	167	162	175
EA674_06885|GNAT_family_N-acetyltransferase	29.8631	-1.23341	0.301731	-4.08779	4.35503e-05	0.000411962	28	24	20	28	23	24	20	13	22	60	51	65
EA674_09895|polyphosphate_kinase_1	52.3058	-0.975841	0.238752	-4.08726	4.36495e-05	0.000412158	52	39	38	59	27	56	29	44	51	73	85	106
EA674_16705|formyltetrahydrofolate_deformylase	245.058	0.535297	0.131388	4.07416	4.61812e-05	0.000435139	414	284	228	354	182	284	219	160	251	205	221	230
EA674_08590|branched-chain_amino_acid_transport_system_II_carrier_protein	389.369	0.460025	0.112922	4.07382	4.6249e-05	0.000435139	526	455	475	495	295	370	346	268	426	398	323	388
CP039994_28852_29156	4.51061	5.45909	1.34238	4.06672	4.76792e-05	0.000447792	13	5	6	8	2	6	3	7	5	0	0	0
CP039993_1199324_1199469	117.46	-0.932999	0.229539	-4.06467	4.81003e-05	0.000450941	127	112	87	114	108	79	88	54	56	183	231	233
EA674_05025|nitronate_monooxygenase	75.5291	-0.857202	0.211102	-4.0606	4.89462e-05	0.000457505	104	57	56	91	39	82	45	34	64	109	146	148
EA674_19245|plasmid_replicase	4.45529	5.52364	1.36035	4.06047	4.89748e-05	0.000457505	13	5	7	14	4	8	2	2	2	0	0	0
EA674_19025|isoleucine--tRNA_ligase	1699.62	0.297379	0.0732676	4.05881	4.93242e-05	0.000459951	2534	1956	1711	2378	1117	1802	1376	1173	1837	1774	1734	1707
EA674_07765|site-specific_DNA-methyltransferase	15.4764	-1.74463	0.429989	-4.05737	4.96275e-05	0.000461958	12	11	8	22	9	10	8	6	8	30	38	40
EA674_05960|hypothetical_protein	14.9221	-1.88157	0.464243	-4.05298	5.05693e-05	0.000469892	10	15	6	7	5	9	7	11	4	32	51	36
EA674_15635|acyl-CoA_dehydrogenase	372.655	-0.462912	0.114411	-4.04603	5.20929e-05	0.000483193	410	392	374	438	195	367	270	204	358	539	571	591
CP039993_2811844_2812508	45.741	-1.20467	0.298814	-4.03151	5.54191e-05	0.00051314	52	37	31	42	15	37	28	21	47	50	125	111
EA674_11510|cytochrome_ubiquinol_oxidase_subunit_I	289.307	-0.465195	0.11545	-4.02939	5.59216e-05	0.000516881	399	280	268	367	145	267	179	192	236	390	432	533
EA674_08825|CTP_synthase	2661.67	0.26082	0.0647626	4.02733	5.64147e-05	0.000520522	3687	2989	2752	3568	1844	2663	2391	1844	2897	2723	2711	2743
EA674_02355|DUF2789_domain-containing_protein	308.074	-0.471548	0.117123	-4.0261	5.67092e-05	0.000522321	381	294	265	394	176	290	223	223	274	368	484	501
EA674_17885|aminoglycoside_O-phosphotransferase_APH(3'')-Ib	974.01	0.448518	0.111479	4.02334	5.73787e-05	0.000527562	1286	1261	1087	1205	762	998	801	631	1113	1077	828	882
EA674_06490|bifunctional_prephenate_dehydrogenase/3-phosphoshikimate_1-carboxyvinyltransferase	793.422	0.345601	0.0859714	4.01996	5.82086e-05	0.000534257	1057	942	858	1072	570	843	691	530	854	785	742	822
EA674_18375|F0F1_ATP_synthase_subunit_C	2940.68	0.315237	0.0786642	4.00737	6.13983e-05	0.00056255	4064	3263	3296	3899	2127	3075	2449	2159	2922	3120	2862	2915
EA674_00530|alpha/beta_hydrolase	18.1143	-1.73051	0.431949	-4.00627	6.16847e-05	0.00056419	20	11	9	14	2	18	17	4	10	41	40	55
EA674_01650|50S_ribosomal_protein_L19	4465.08	0.329467	0.0823348	4.00156	6.29266e-05	0.000574548	6148	5381	4614	5844	3371	4451	3953	2961	4788	4775	4418	4159
CP039993_3777729_3777800	80.3576	0.877136	0.220011	3.98678	6.69758e-05	0.000610457	88	106	81	111	65	99	74	74	104	63	50	44
EA674_10200|lipoyl_synthase	451.982	-0.447604	0.112315	-3.98524	6.74111e-05	0.000613359	491	441	465	540	292	384	387	236	421	637	669	695
EA674_10475|TonB-dependent_receptor	571.931	0.366766	0.0921481	3.98017	6.88651e-05	0.000625001	823	626	647	766	416	583	499	407	577	565	561	564
CP039993_355671_356050	215.666	0.516981	0.129896	3.97995	6.89286e-05	0.000625001	332	235	243	339	140	236	187	173	192	197	181	209
CP039993_3632067_3632386	14343	0.283114	0.0715058	3.95932	7.51648e-05	0.000680371	20246	15952	13381	20205	10362	15672	12592	10744	15121	13283	15029	13765
EA674_07315|tRNA_(adenosine(37)-N6)-dimethylallyltransferase_MiaA	504.077	-0.423727	0.107055	-3.95805	7.5565e-05	0.000682816	558	496	483	580	311	442	422	338	489	608	747	807
EA674_19560|hypothetical_protein	4.27845	5.46302	1.38066	3.95681	7.59569e-05	0.000685179	6	12	5	6	4	8	4	0	7	0	0	0
EA674_00710|exodeoxyribonuclease_III	168.22	0.564512	0.142815	3.95275	7.72589e-05	0.000695728	252	195	199	221	119	192	154	107	177	146	163	145
EA674_04455|7-cyano-7-deazaguanine_synthase_QueC	921.247	0.385198	0.0974913	3.9511	7.77918e-05	0.000699327	1260	1068	1018	1141	714	981	836	529	1093	959	837	875
CP039993_3870931_3871190	270.654	-0.49325	0.124875	-3.94994	7.8171e-05	0.000701534	303	247	269	331	153	282	194	178	236	418	421	363
EA674_12995|glutathione_S-transferase	66.214	-0.829952	0.210189	-3.94861	7.86078e-05	0.00070425	78	53	49	101	36	65	37	41	57	92	112	127
EA674_05750|aminodeoxychorismate/anthranilate_synthase_component_II	168.462	0.562282	0.142559	3.94421	8.00634e-05	0.00071607	261	188	174	236	126	203	132	125	190	134	159	143
EA674_16670|thymidylate_synthase	1564.54	0.275925	0.0699754	3.94318	8.04096e-05	0.000717943	2226	1657	1682	2033	1078	1612	1396	1111	1705	1593	1523	1658
EA674_14555|hypothetical_protein	94.3955	-0.770814	0.195703	-3.9387	8.19252e-05	0.000730233	124	80	48	109	58	90	70	76	90	148	136	154
EA674_10575|IscS_subfamily_cysteine_desulfurase	1661.16	0.308413	0.0784612	3.93077	8.46728e-05	0.000753221	2504	1814	1675	2403	1074	1808	1300	1259	1769	1773	1620	1597
EA674_02690|tRNA_preQ1(34)_S-adenosylmethionine_ribosyltransferase-isomerase_QueA	178.76	0.594413	0.151233	3.93044	8.47912e-05	0.000753221	242	209	214	242	119	188	173	151	179	124	155	183
EA674_13170|metal-dependent_hydrolase	4.9357	5.53563	1.40985	3.92639	8.62309e-05	0.000764716	10	13	2	14	1	1	4	6	11	0	0	0
EA674_16825|aspartate-semialdehyde_dehydrogenase	683.542	0.413281	0.105396	3.92121	8.81061e-05	0.000780029	1173	778	636	958	450	756	579	488	693	712	635	637
CP039993_2584563_2584864	26.8093	-1.52072	0.388136	-3.91802	8.9279e-05	0.000789082	34	10	15	33	8	27	29	7	17	47	63	61
EA674_05085|D-alanyl-D-alanine_carboxypeptidase_PBP6B	157.13	0.559102	0.14274	3.91693	8.96855e-05	0.000791342	228	189	174	220	123	155	141	108	170	139	141	137
EA674_15415|ribonucleotide-diphosphate_reductase_subunit_beta	5335.62	0.302579	0.0772674	3.916	9.00301e-05	0.00079305	7487	5867	5867	6887	3742	5515	4833	3515	5811	5828	5177	5195
EA674_01920|inositol_monophosphatase	563.592	0.39722	0.101679	3.9066	9.36038e-05	0.000823149	826	653	561	715	419	570	541	366	665	602	462	539
EA674_13815|Lon_protease	3486.8	-0.310552	0.0795705	-3.90285	9.50664e-05	0.000834613	4461	3373	3123	4407	1954	3399	2792	2305	3820	4211	4733	5151
EA674_18130|inorganic_diphosphatase	1174.66	0.368387	0.0944404	3.90074	9.59009e-05	0.000840534	1643	1360	1316	1501	817	1292	1067	778	1198	1281	1086	1117
EA674_05860|hypothetical_protein	455.695	0.538687	0.138176	3.89855	9.67691e-05	0.00084673	783	488	434	679	262	522	340	455	470	302	456	444
EA674_06630|30S_ribosomal_protein_S21	4627.35	0.336849	0.0865801	3.8906	9.99971e-05	0.000873518	6337	5511	4829	5910	3645	4496	4161	3023	5071	5118	4158	4465
EA674_02120|30S_ribosomal_protein_S8	9146.11	0.275936	0.0710443	3.884	0.000102754	0.000894654	12265	9528	9513	12064	6529	10134	8278	6948	9843	9316	8830	8725
EA674_16590|PKHD-type_hydroxylase	107.702	0.675157	0.173831	3.88399	0.000102757	0.000894654	188	124	114	139	91	111	86	77	117	93	79	103
EA674_04650|glyceraldehyde-3-phosphate_dehydrogenase	4050.76	0.257196	0.0662482	3.88231	0.000103469	0.000899359	6199	4279	4005	5420	2871	4152	3536	2782	4369	4048	4174	4257
CP039993_3208601_3208967	57.3554	0.962857	0.248128	3.88048	0.000104249	0.00090464	76	73	58	82	46	78	64	38	67	38	26	47
CP039994_65475_65640	4.5761	5.34393	1.37733	3.87993	0.000104488	0.000905216	11	5	6	14	2	2	3	4	11	0	0	0
EA674_01645|tRNA_(guanosine(37)-N1)-methyltransferase_TrmD	7250.89	0.314132	0.0811065	3.87308	0.000107468	0.000929498	9287	8391	7759	9004	5684	7308	7005	4584	8161	7507	6926	6965
EA674_02945|peroxiredoxin	587.942	-0.41305	0.106798	-3.8676	0.000109912	0.000949079	725	519	581	631	358	572	462	389	577	704	882	947
EA674_10285|hypothetical_protein	67.9442	-0.827627	0.214036	-3.86677	0.000110288	0.000950763	95	47	53	105	30	59	34	48	52	113	125	116
EA674_10180|dihydrolipoyl_dehydrogenase	2425.02	-0.372325	0.0963516	-3.86423	0.000111438	0.000959098	3408	2102	2346	3082	1272	2466	1685	1689	2109	3843	3395	3210
CP039993_319191_319645	168.904	0.567958	0.147087	3.86138	0.000112749	0.000968794	275	180	219	211	125	187	124	124	164	163	147	162
EA674_19445|hypothetical_protein	3.56258	5.33982	1.38527	3.85472	0.000115863	0.000993919	11	6	5	8	1	6	4	1	4	0	0	0
EA674_10690|heme-binding_protein	36.4903	-1.10525	0.286811	-3.85358	0.000116404	0.000996932	37	25	27	29	25	35	37	13	32	55	64	80
EA674_12870|hypothetical_protein	253.037	-0.632376	0.164124	-3.85304	0.000116659	0.000997488	324	236	188	369	86	299	118	205	229	294	425	478
EA674_16320|rhodanese-like_domain-containing_protein	751.025	0.348433	0.0906415	3.84408	0.000121007	0.00103299	1127	847	805	992	464	786	598	524	919	733	723	808
EA674_10775|30S_ribosomal_protein_S1	32166	0.276643	0.0720029	3.84211	0.000121981	0.00103961	41173	36732	33405	40726	25424	31776	30581	21556	35411	32287	31676	32070
EA674_01245|DUF805_domain-containing_protein	18.7337	-1.50163	0.391008	-3.8404	0.000122834	0.00104519	18	14	12	18	9	13	13	3	16	53	31	45
EA674_16555|fumarate_hydratase	2822.03	0.308406	0.0803512	3.83823	0.000123925	0.00105276	4489	3062	2977	3827	1835	2886	2215	2033	2993	3173	2751	2825
CP039993_717653_718307	506.26	-0.37898	0.0987931	-3.83609	0.000125006	0.00106023	627	520	457	640	246	485	399	349	485	717	708	742
EA674_19225|membrane_protein_insertase_YidC	3707.34	0.294745	0.0768767	3.834	0.000126077	0.00106759	5425	4090	3739	4848	2741	3623	3432	2498	4055	4054	3493	3615
EA674_16675|dihydrofolate_reductase	681.581	0.348333	0.0910152	3.8272	0.00012961	0.00109574	1082	780	733	879	450	647	555	476	750	758	668	678
EA674_13835|NADP-specific_glutamate_dehydrogenase	282.411	0.50912	0.133095	3.82524	0.000130643	0.00110269	514	282	311	412	187	266	227	212	306	284	250	262
CP039994_7754_7856	5.90102	5.38177	1.40721	3.82443	0.000131074	0.00110455	8	7	7	5	1	9	15	12	1	0	0	0
EA674_13095|alanine--tRNA_ligase	2891.73	0.259841	0.0680111	3.82057	0.000133144	0.00112021	4161	3039	2977	3998	1978	2974	2449	2125	3196	3038	2865	2891
EA674_16055|pantoate--beta-alanine_ligase	256.227	0.464686	0.12176	3.8164	0.000135413	0.00113747	385	300	281	361	169	271	197	179	307	213	236	279
CP039993_1267468_1268208	358.834	0.410301	0.10759	3.81357	0.000136975	0.00114875	515	375	405	495	240	378	332	249	417	344	337	331
EA674_08520|DUF159_family_protein	265.995	-0.488953	0.128295	-3.81116	0.000138316	0.00115815	296	230	288	302	175	248	192	165	232	365	410	423
CP039994_29378_29718	4.16178	5.26458	1.38288	3.80697	0.000140679	0.00117606	7	2	11	3	4	4	5	5	6	0	0	0
EA674_09280|LysR_family_transcriptional_regulator	266.545	-0.532163	0.139825	-3.80591	0.000141284	0.00117924	281	260	258	283	144	225	227	183	256	336	383	498
EA674_11845|acetyl/propionyl/methylcrotonyl-CoA_carboxylase_subunit_alpha	875.507	-0.412848	0.108526	-3.80414	0.000142295	0.00118579	1292	704	801	1198	464	905	570	558	827	1292	1200	1320
EA674_05785|ATP-binding_protein	19.4636	-1.49998	0.394577	-3.80149	0.00014383	0.00119669	20	15	13	21	6	8	12	4	19	31	53	57
EA674_11780|hypothetical_protein	15827	-0.406885	0.107059	-3.80057	0.000144362	0.00119921	15506	14969	16238	15238	12728	12709	16092	8302	16671	20100	21356	24293
EA674_15410|preprotein_translocase_subunit_YajC	106.151	0.739969	0.194839	3.79785	0.000145954	0.00121052	170	140	95	143	101	123	77	76	119	69	96	85
EA674_18750|GntR_family_transcriptional_regulator	134.558	-0.610895	0.161054	-3.7931	0.000148776	0.00123198	153	123	115	171	89	121	93	86	118	244	187	188
CP039993_479053_479264	641.832	0.392334	0.103661	3.78479	0.000153841	0.00127191	982	721	659	774	531	622	571	454	676	687	573	597
EA674_10150|TIGR01244_family_phosphatase	50.6488	1.28392	0.339267	3.78438	0.000154091	0.00127198	88	41	28	94	45	52	42	52	104	14	18	33
EA674_07110|peptide_chain_release_factor_1	251.579	0.446156	0.118089	3.77813	0.000158013	0.0013023	361	275	279	344	180	268	232	178	274	210	229	260
EA674_16460|helix-turn-helix_domain-containing_protein	939.359	0.318014	0.0842001	3.77688	0.000158807	0.0013068	1419	1051	953	1353	572	980	738	714	1054	972	911	954
EA674_07930|DUF4468_domain-containing_protein	119.483	-0.618413	0.163946	-3.77205	0.000161911	0.00133008	127	89	106	148	74	123	81	91	135	171	170	173
EA674_05305|tRNA_2-thiouridine(34)_synthase_MnmA	362.351	0.401776	0.106524	3.77169	0.000162143	0.00133008	519	399	417	477	248	397	286	272	396	368	319	365
CP039993_374299_374443	452.3	-0.403361	0.106986	-3.77021	0.000163109	0.00133592	512	452	414	571	291	448	317	352	370	656	624	620
CP039993_2008030_2008106	12.1501	-1.83647	0.48761	-3.76627	0.000165704	0.00135506	13	9	6	7	2	4	6	2	12	44	33	25
EA674_17545|50S_ribosomal_protein_L7/L12	8004.03	0.276375	0.0735637	3.75696	0.000171993	0.00140359	11547	8975	7555	11025	5728	8487	6944	5996	8355	8055	8278	7569
CP039993_1558891_1559303	97.146	-0.797809	0.21237	-3.75669	0.000172174	0.00140359	112	53	104	100	56	77	77	57	100	150	195	140
EA674_18235|cysteine_synthase_A	213.403	-0.479736	0.127837	-3.75272	0.000174929	0.00142384	233	208	191	293	139	191	147	150	198	284	311	325
CP039993_2812745_2812953	20.6924	-1.4394	0.384047	-3.74797	0.000178274	0.00144882	27	11	12	16	13	23	9	5	16	43	45	50
EA674_15430|hypothetical_protein	99.133	-0.699121	0.1867	-3.74462	0.000180664	0.00146597	95	97	80	124	79	67	78	55	98	133	168	161
EA674_13480|hypothetical_protein	47.7203	-0.913175	0.244209	-3.73932	0.000184521	0.00149403	44	47	36	50	32	38	25	35	42	77	84	89
EA674_16455|flavodoxin-dependent_(E)-4-hydroxy-3-methylbut-2-enyl-diphosphate_synthase	771.741	0.317339	0.0848706	3.73909	0.00018469	0.00149403	1152	854	794	1051	539	811	652	550	806	823	741	759
EA674_05270|phosphate_ABC_transporter_permease_PstA	71.3642	0.817783	0.218736	3.73867	0.000184994	0.00149418	114	88	82	97	61	85	75	36	68	57	56	54
EA674_13320|DNA_polymerase_III_subunit_epsilon	183.682	0.514336	0.137914	3.7294	0.00019194	0.0015479	262	226	204	260	104	218	139	147	209	171	151	183
EA674_12150|3-oxoadipyl-CoA_thiolase	1798.63	0.406599	0.109074	3.72776	0.000193193	0.00155562	2193	1950	2189	2216	1421	1737	1902	1111	2097	1863	1508	1662
EA674_11345|peptide-methionine_(R)-S-oxide_reductase_MsrB	182.107	-0.504252	0.135389	-3.72448	0.00019572	0.00157355	227	170	164	269	63	211	113	138	145	269	275	281
EA674_12480|glutathione-dependent_formaldehyde_dehydrogenase	472.316	0.525114	0.141215	3.71855	0.000200368	0.00160846	572	481	612	592	354	461	516	324	583	365	340	523
EA674_17900|IS91-like_element_ISVsa3_family_transposase	54.1355	0.975659	0.263005	3.70966	0.000207539	0.00166348	87	91	63	77	37	59	36	39	53	48	55	24
EA674_06590|quinone-dependent_dihydroorotate_dehydrogenase	834.267	0.310529	0.0838028	3.70547	0.000210998	0.00168863	1205	875	910	1172	558	926	705	559	918	812	806	886
EA674_12960|O-methyltransferase	115.371	-0.611887	0.165154	-3.70495	0.000211432	0.00168935	161	106	89	147	45	128	70	80	94	164	186	210
CP039993_3793226_3793310	1713.41	0.298123	0.0804741	3.70459	0.000211732	0.00168935	2315	1894	1781	2303	1231	1875	1502	1339	1686	1632	1770	1666
CP039993_436269_436361	9421.74	0.267803	0.0723475	3.70162	0.000214225	0.00170665	12506	9662	10126	13196	6462	10477	7647	7660	10007	9586	9255	9089
EA674_11620|glutathione-dependent_disulfide-bond_oxidoreductase	188.343	-0.490295	0.132523	-3.6997	0.000215854	0.00171702	212	184	188	201	128	168	127	110	183	270	283	305
EA674_11615|glutathione_transferase	65.4651	-0.834161	0.225604	-3.69745	0.000217777	0.0017297	77	49	54	74	50	50	30	42	67	115	116	100
EA674_08765|ATP-dependent_Clp_protease_adapter_ClpS	321.749	-0.388583	0.105186	-3.69426	0.00022053	0.00174768	387	321	283	409	191	343	224	221	307	458	421	469
EA674_08700|Rieske_(2Fe-2S)_protein	259.585	0.463918	0.125585	3.69405	0.000220707	0.00174768	369	284	278	332	199	255	238	216	284	249	234	217
EA674_16545|acetate_kinase	594.705	-0.430639	0.116648	-3.6918	0.000222675	0.00176061	826	505	475	848	301	645	344	474	613	788	858	845
EA674_02335|tRNA_(N6-isopentenyl_adenosine(37)-C2)-methylthiotransferase_MiaB	992.464	0.324307	0.0878963	3.68965	0.000224562	0.00177216	1300	1201	1054	1241	784	989	914	615	1094	997	937	1035
EA674_13015|aspartate_carbamoyltransferase	315.231	0.421829	0.114336	3.68937	0.000224811	0.00177216	502	370	346	435	196	324	266	207	338	343	271	327
EA674_02055|50S_ribosomal_protein_L4	15671.5	0.238474	0.0646746	3.68728	0.00022666	0.00178405	21587	16273	16138	20874	11016	16625	13983	11623	16956	16148	15894	15420
EA674_10685|Zn-dependent_oligopeptidase	100.461	-0.695467	0.188945	-3.68079	0.000232516	0.00182741	115	74	83	128	80	78	75	57	109	158	117	182
CP039993_2029444_2029673	26.3355	1.52491	0.414512	3.67881	0.00023432	0.00183884	83	29	25	64	17	24	10	22	20	22	11	14
EA674_01640|ribosome_maturation_factor_RimM	8775.37	0.273777	0.0745509	3.67236	0.000240325	0.00188218	11058	10136	8968	10855	7002	8792	8438	5749	9972	8796	8603	8684
EA674_03085|large_conductance_mechanosensitive_channel_protein_MscL	95.9659	-0.672695	0.183191	-3.6721	0.000240561	0.00188218	116	68	88	94	62	93	73	70	83	140	152	157
EA674_19605|DsbC_family_protein	3.87289	5.06934	1.38177	3.66874	0.000243751	0.0019043	8	5	5	12	3	6	3	1	6	0	0	0
EA674_07000|50S_ribosomal_protein_L9	9776.62	0.279614	0.0762382	3.66764	0.000244801	0.00190967	14165	11041	9615	13053	7080	10260	8437	6720	10547	10580	9822	9205
CP039993_551352_551420	40.4645	-1.02502	0.279527	-3.66697	0.000245441	0.00191182	50	37	28	38	30	28	17	24	23	64	97	80
EA674_00840|peptide_chain_release_factor_2	648.318	0.339948	0.0928213	3.6624	0.000249866	0.0019434	896	723	687	909	459	652	622	455	669	643	627	624
EA674_00120|methionine/alanine_import_family_NSS_transporter_small_subunit	83.3777	-0.748805	0.205389	-3.64578	0.000266579	0.00207033	100	65	51	106	38	83	79	68	82	111	139	122
EA674_05260|phosphonate_ABC_transporter_substrate-binding_protein	145.59	0.545904	0.149769	3.64498	0.000267418	0.00207377	198	154	137	202	111	177	146	113	181	114	118	115
EA674_08630|hypothetical_protein	387.394	-0.433765	0.119028	-3.64424	0.000268188	0.00207667	419	394	321	438	232	408	376	239	387	501	544	553
EA674_06465|hypothetical_protein	50.3289	1.09397	0.300291	3.64304	0.000269433	0.00208324	69	81	35	66	56	63	55	35	48	21	35	34
EA674_08675|cytochrome_d_ubiquinol_oxidase_subunit_II	1696.19	-0.283366	0.077797	-3.64237	0.00027014	0.00208555	2223	1521	1518	2461	919	1907	1139	1350	1631	2113	2284	2212
CP039993_2940440_2940676	25.7123	-1.34237	0.368581	-3.642	0.000270525	0.00208555	16	28	9	28	11	30	14	23	24	56	45	39
EA674_01725|TIGR01666_family_membrane_protein	31.2703	-1.12903	0.310349	-3.63794	0.000274831	0.00211563	41	27	12	38	19	26	16	17	29	51	63	64
EA674_12265|DUF333_domain-containing_protein	369.953	-0.459073	0.12622	-3.6371	0.000275726	0.00211942	357	332	371	418	259	318	378	213	380	470	519	548
CP039993_3644248_3644442	41.5724	1.13113	0.311086	3.63608	0.000276823	0.00212474	57	36	58	72	19	44	41	48	56	24	28	20
EA674_03480|SPFH/Band_7/PHB_domain_protein	135.403	-0.541969	0.149139	-3.63398	0.000279083	0.00213896	154	115	128	183	84	129	94	86	128	199	188	215
CP039993_183601_183800	83.5489	1.00405	0.27639	3.63274	0.000280432	0.00214617	208	96	76	199	55	75	59	47	71	51	64	75
CP039993_2032891_2032968	26.3766	-1.51471	0.417085	-3.63167	0.000281597	0.00215194	37	7	14	40	16	14	18	19	10	35	62	69
EA674_17550|50S_ribosomal_protein_L10	18770	0.272492	0.0750623	3.63021	0.000283186	0.00216094	26024	21135	18931	25119	13447	19584	15757	14342	19589	20373	18425	17914
EA674_19485|hypothetical_protein	3.2311	5.06897	1.39731	3.62767	0.000285991	0.00217917	8	5	5	3	2	3	6	3	3	0	0	0
CP039993_3254130_3254195	13.4734	-1.69277	0.467097	-3.62402	0.000290064	0.00220701	11	5	8	16	9	16	8	7	11	30	25	25
EA674_15785|peptidase	87.8042	-0.677013	0.186977	-3.62084	0.000293651	0.00223107	119	79	69	115	58	77	52	49	62	141	134	165
EA674_17510|TRAP_transporter_large_permease_subunit	180.763	0.552165	0.152534	3.61996	0.000294651	0.00223543	240	241	221	230	142	159	183	115	172	149	178	176
EA674_19665|conjugal_transfer_protein_TraH	3.21103	5.20269	1.43933	3.61466	0.000300738	0.00227832	10	5	5	5	6	4	0	1	3	0	0	0
EA674_10225|50S_ribosomal_protein_L3_N(5)-glutamine_methyltransferase	513.723	0.333017	0.0921586	3.61352	0.000302072	0.00228512	756	581	520	677	370	561	428	365	548	490	530	506
CP039994_69382_69485	3.05993	5.12725	1.41932	3.61248	0.000303284	0.00229099	5	4	9	2	3	4	3	3	2	0	0	0
EA674_03065|amino_acid_permease	572.51	0.361763	0.100179	3.61115	0.000304842	0.00229945	765	631	591	826	427	538	585	380	661	558	493	559
EA674_18095|heteromeric_transposase_endonuclease_subunit_TnsA	120.115	-0.60762	0.168333	-3.60962	0.000306645	0.00230973	155	92	87	134	70	128	109	82	121	165	185	172
EA674_03405|bifunctional_phosphoserine_phosphatase/homoserine_phosphotransferase_ThrH	335.814	0.424766	0.11769	3.60918	0.000307167	0.00231035	532	344	343	481	243	358	311	211	392	327	314	293
EA674_02140|50S_ribosomal_protein_L30	5484.28	0.247147	0.0685795	3.6038	0.000313601	0.00235537	7501	5736	5496	7690	3815	6117	4793	4119	5825	5594	5553	5203
CP039993_431554_431611	7365.26	0.242013	0.0672124	3.60072	0.000317343	0.00238007	9984	7912	7105	10027	5605	7987	6662	5173	7975	7209	7521	7173
CP039993_3579074_3579163	359.792	0.426351	0.118448	3.59947	0.000318869	0.00238811	456	462	359	479	281	374	314	291	368	324	317	353
EA674_04175|diaminopimelate_decarboxylase	461.547	0.353372	0.0982913	3.59515	0.000324204	0.0024246	687	530	462	629	319	495	420	318	477	474	439	446
EA674_18365|F0F1_ATP_synthase_subunit_delta	5613.89	0.267133	0.0743129	3.59471	0.000324754	0.00242526	7432	6358	5705	7635	4093	6111	4920	3994	5841	5879	5557	5421
EA674_07245|hypothetical_protein	9.65872	-2.01792	0.561512	-3.59372	0.000325992	0.00243105	4	4	9	6	6	8	4	3	7	22	30	21
EA674_06220|30S_ribosomal_protein_S2	13906.1	0.269623	0.0751269	3.5889	0.000332077	0.00247291	18580	15862	14397	18264	10251	14178	12684	9574	14717	14915	13794	13457
CP039993_3500221_3500549	528.389	0.366671	0.102403	3.58069	0.000342692	0.00254835	661	587	602	720	380	557	508	376	563	497	497	510
EA674_06860|MCE_family_protein	78.956	-0.69443	0.194095	-3.57778	0.000346522	0.00257158	85	69	79	89	35	62	59	53	74	118	143	133
EA674_01845|glycine--tRNA_ligase_subunit_beta	1174.23	0.262144	0.0732743	3.57758	0.000346795	0.00257158	1677	1305	1171	1512	867	1199	1007	817	1312	1210	1185	1191
EA674_00410|formimidoylglutamase	66.721	0.816226	0.22836	3.5743	0.000351169	0.00260033	82	96	74	101	56	70	62	46	72	60	46	44
EA674_00560|pyridoxal_phosphate-dependent_aminotransferase	177.744	-0.488304	0.136794	-3.56962	0.000357501	0.00264349	193	168	164	215	110	162	153	111	173	227	275	267
EA674_03785|succinate--CoA_ligase_subunit_alpha	2937.36	0.28912	0.0810334	3.56792	0.000359832	0.00265699	4093	3179	2907	4192	2176	3163	2558	2082	3156	3076	2888	2650
EA674_08680|cytochrome_bd-I_ubiquinol_oxidase_subunit_CydA	2468.11	-0.262895	0.073799	-3.56231	0.000367608	0.00271059	3386	2249	2343	3448	1323	2652	1634	1911	2219	3317	3247	3312
EA674_03295|hypothetical_protein	449.269	0.521337	0.146382	3.56149	0.000368749	0.00271519	570	601	505	616	402	462	341	342	394	430	424	371
EA674_07645|UDP-N-acetylmuramate_dehydrogenase	64.7875	0.761247	0.213962	3.55786	0.000373888	0.00274918	106	96	74	80	47	71	44	48	64	53	64	52
EA674_07420|hypothetical_protein	53.7917	-0.875585	0.246331	-3.5545	0.000378695	0.00278063	60	32	39	48	43	42	44	45	59	80	73	95
EA674_17755|ferrous_iron_transport_protein_A	153.702	0.543218	0.152954	3.5515	0.000383037	0.00280858	201	187	187	202	128	162	136	94	166	138	126	150
EA674_17580|elongation_factor_Tu	48621	0.263707	0.0742646	3.55092	0.00038389	0.00281091	68033	53874	51124	65469	33385	52215	38951	36966	49829	54299	47718	47517
CP039993_1458495_1458811	402.668	0.393369	0.110804	3.55014	0.00038503	0.00281533	594	437	408	552	327	450	317	287	437	407	364	361
EA674_16325|glutaredoxin_3	844.658	0.281594	0.0793772	3.54755	0.000388836	0.00283921	1201	987	831	1116	573	868	715	622	933	859	807	911
EA674_13575|methyltransferase	10.5109	-1.8675	0.526652	-3.54598	0.00039116	0.00285221	6	5	9	13	3	11	6	2	7	24	25	28
EA674_00280|PQQ-dependent_sugar_dehydrogenase	77.7525	-0.678123	0.191367	-3.54358	0.000394741	0.00287433	83	83	61	101	36	77	50	54	64	108	128	143
EA674_08695|DUF1449_family_protein	29.892	1.177	0.332216	3.54287	0.000395805	0.00287809	66	35	42	21	19	26	33	25	32	17	25	23
EA674_13260|argininosuccinate_synthase	1655.42	0.266201	0.0751564	3.54196	0.000397171	0.00288403	2331	1787	1750	2164	1209	1689	1487	1122	1768	1777	1610	1677
EA674_17555|50S_ribosomal_protein_L1	11240.4	0.278238	0.0785807	3.54079	0.000398932	0.00289281	16239	12897	10938	14992	8160	11885	9525	7872	11931	12238	11310	10557
EA674_00135|dihydroxy-acid_dehydratase	1234.44	0.307414	0.0868749	3.53858	0.000402291	0.00291314	1811	1353	1317	1797	789	1327	917	932	1327	1368	1189	1191
EA674_01325|sel1_repeat_family_protein	462.02	-0.40218	0.113676	-3.53794	0.00040326	0.00291613	649	425	381	635	212	512	258	374	440	622	640	714
CP039994_12287_12766	2.82492	5.09136	1.43945	3.53702	0.000404669	0.00292079	12	3	4	4	1	3	5	1	3	0	0	0
EA674_19340|hypothetical_protein	3.9385	4.95481	1.40093	3.53679	0.000405016	0.00292079	9	6	2	3	7	8	3	3	4	0	0	0
EA674_05230|diaminobutyrate--2-oxoglutarate_transaminase	4924.85	0.215052	0.0608397	3.53473	0.000408195	0.00293968	6976	5375	4961	6539	3485	5185	4232	3374	5229	5186	5085	5180
EA674_10025|CoA_transferase_subunit_B	619.085	-0.407737	0.115397	-3.53335	0.00041033	0.002951	787	525	519	967	294	683	375	498	670	810	848	845
EA674_15720|ribulose-phosphate_3-epimerase	333.022	0.404823	0.114668	3.53039	0.000414951	0.00298015	539	348	369	444	263	334	258	217	365	326	324	329
CP039993_71309_71373	13.3524	-1.76056	0.498766	-3.52984	0.000415815	0.0029818	10	4	8	11	10	8	15	12	8	26	26	25
EA674_06450|NAD(+)_kinase	314.385	0.408411	0.115713	3.52952	0.000416316	0.0029818	467	315	356	438	206	308	274	253	362	277	293	320
EA674_11350|pyridoxal_phosphate-dependent_aminotransferase	351.021	0.440387	0.124904	3.52581	0.000422195	0.00301979	422	391	399	453	295	326	367	217	446	355	278	304
EA674_06255|septal_ring_lytic_transglycosylase_RlpA_family_protein	1830.74	0.366706	0.104037	3.52478	0.00042383	0.00302735	2387	2225	1965	2255	1542	1776	1675	1151	2025	2042	1612	1674
EA674_02670|preprotein_translocase_subunit_YajC	421.783	0.354069	0.100479	3.52382	0.000425381	0.00303431	589	485	441	560	292	430	379	301	478	442	391	398
CP039993_3724606_3724690	136.479	-0.648021	0.183946	-3.52289	0.000426865	0.00303716	121	107	130	165	93	136	123	80	146	145	188	261
EA674_17805|2,3-bisphosphoglycerate-independent_phosphoglycerate_mutase	608.696	0.323275	0.0917724	3.52258	0.000427375	0.00303716	879	714	600	794	416	650	543	434	656	644	552	620
EA674_18765|D-lactate_dehydrogenase	33.9214	1.09034	0.309537	3.52249	0.000427517	0.00303716	51	47	52	49	12	43	26	31	35	32	17	25
EA674_03075|uracil-xanthine_permease	279.196	0.476672	0.135391	3.52071	0.000430397	0.00305349	390	319	338	342	213	327	217	204	281	302	236	247
CP039993_3130449_3130594	31.6595	-1.02205	0.290916	-3.5132	0.000442736	0.0031368	34	25	21	37	13	33	21	19	34	55	53	60
EA674_16225|iron-containing_redox_enzyme_family_protein	11.7382	-1.95467	0.557802	-3.50423	0.000457924	0.00323964	17	7	1	4	1	9	6	9	6	28	30	38
EA674_02050|50S_ribosomal_protein_L3	28201.5	0.256192	0.0731237	3.50355	0.0004591	0.00323964	38076	30399	30408	36939	20122	30029	24722	19690	30157	30768	27497	27933
EA674_02175|DNA-directed_RNA_polymerase_subunit_alpha	27289.1	0.235253	0.0671471	3.50355	0.000459103	0.00323964	37533	29669	27998	36554	19265	29306	22753	20163	28788	29446	27531	26931
EA674_02675|tRNA_guanosine(34)_transglycosylase_Tgt	304.438	0.493221	0.140915	3.50014	0.000465013	0.00327649	379	422	352	384	223	312	295	189	307	327	250	285
CP039520_1178775_1178887	6.72464	4.05766	1.15939	3.49982	0.000465574	0.00327649	13	8	11	11	11	6	7	4	5	1	0	1
EA674_03045|prepilin-type_N-terminal_cleavage/methylation_domain-containing_protein	47.3929	-0.918775	0.26272	-3.49717	0.000470228	0.00330482	38	45	37	59	38	27	35	31	41	66	79	94
EA674_16925|catalase/peroxidase_HPI	120.778	-0.567987	0.162595	-3.49327	0.000477153	0.003349	145	110	112	146	53	98	96	86	115	185	173	208
EA674_16715|coniferyl_aldehyde_dehydrogenase	659.506	0.332954	0.0953251	3.49283	0.000477936	0.00335002	980	791	677	937	376	739	494	466	756	653	664	698
EA674_00600|M23_family_metallopeptidase	10.4214	-1.87135	0.536045	-3.49103	0.000481171	0.00336819	8	5	8	6	5	14	4	3	3	27	28	25
EA674_00550|SDR_family_NAD(P)-dependent_oxidoreductase	113.693	-0.594761	0.170426	-3.48984	0.000483304	0.00337862	130	85	101	149	66	109	95	93	93	156	150	190
CP039993_2717381_2717477	2.62306	5.17409	1.48293	3.48909	0.000484662	0.00338361	8	1	10	1	2	2	3	0	5	0	0	0
EA674_04410|phosphoribosylformylglycinamidine_synthase	6024	0.216177	0.06205	3.48392	0.000494131	0.00344514	8874	6517	6127	7837	4140	6158	5195	3906	6727	6403	6284	6461
EA674_06060|hypothetical_protein	8.15441	3.09481	0.890324	3.47605	0.000508858	0.00354311	9	8	15	18	10	9	5	9	8	2	0	2
CP039993_2865308_2865664	117.103	0.584122	0.168227	3.47223	0.000516152	0.00358774	176	148	120	165	73	118	94	110	126	96	111	100
EA674_19275|hypothetical_protein	4.21657	4.78387	1.37797	3.47167	0.00051723	0.00358774	8	4	3	6	4	9	8	3	4	0	0	0
EA674_12380|type_VI_secretion_system_baseplate_subunit_TssF	30.4293	-1.04205	0.300162	-3.47163	0.000517317	0.00358774	30	34	20	35	17	17	14	19	24	60	60	60
EA674_02035|cystathionine_beta-lyase	67.0846	-0.752214	0.216858	-3.46869	0.000523007	0.00362241	65	63	44	81	53	54	47	56	63	98	101	102
EA674_03160|proline--tRNA_ligase	521.624	0.341872	0.0986013	3.46721	0.000525884	0.00363458	764	637	557	759	317	514	416	376	545	573	483	549
CP039993_1121981_1122174	418.056	0.383197	0.110525	3.46708	0.000526149	0.00363458	598	487	459	572	330	414	330	286	437	452	386	392
EA674_15770|putative_pilus_assembly_protein_FilE	39.7175	-0.962589	0.277911	-3.46366	0.000532883	0.00367626	53	30	27	46	12	29	34	29	30	72	80	67
EA674_01890|acyl-CoA_dehydrogenase	157.178	-0.490542	0.141803	-3.45932	0.000541544	0.00373111	192	148	145	192	87	149	119	94	149	260	216	231
EA674_05040|UDP-N-acetylglucosamine_2-epimerase_(non-hydrolyzing)	112.947	-0.568033	0.164319	-3.4569	0.000546435	0.00375987	128	100	97	141	74	97	82	81	110	141	181	179
EA674_04245|TolC_family_protein	38.6139	-0.948633	0.274601	-3.45459	0.000551126	0.00378719	43	33	25	42	18	50	29	20	31	63	74	64
EA674_07010|30S_ribosomal_protein_S6	17154.5	0.222021	0.0642792	3.454	0.000552327	0.00379048	23439	19225	17334	22241	12421	17415	14847	12294	18333	18584	17191	17652
EA674_07750|hypothetical_protein	10.9088	-1.77637	0.5148	-3.4506	0.000559339	0.00383359	6	10	7	9	2	5	6	3	13	24	33	26
EA674_06705|acyl-CoA_dehydrogenase	24.4101	-1.2045	0.349203	-3.44928	0.000562077	0.00384733	31	23	14	20	2	23	12	15	21	48	53	60
EA674_04165|amino_acid_permease	291.667	-0.421418	0.12221	-3.44831	0.000564105	0.00385619	375	261	252	370	173	322	189	188	313	406	431	390
CP039993_2077394_2078171	27.8655	1.16301	0.337358	3.44739	0.000566033	0.00386029	61	42	26	36	13	34	26	25	25	16	17	26
EA674_08620|CBS_domain-containing_protein	239.182	-0.461866	0.133978	-3.44732	0.000566176	0.00386029	339	223	206	309	109	234	148	168	223	297	393	400
EA674_06755|sodium/glutamate_symporter	78.9655	0.687311	0.199575	3.44388	0.000573431	0.00390288	145	88	84	108	56	94	52	63	86	66	71	65
EA674_11185|iron-containing_redox_enzyme_family_protein	21.6753	-1.31497	0.381854	-3.44365	0.00057391	0.00390288	14	24	11	20	18	13	18	12	12	38	47	43
EA674_03365|rod_shape-determining_protein	1270.18	0.296523	0.086143	3.44222	0.000576959	0.00391501	1993	1367	1414	1714	862	1283	957	869	1320	1445	1255	1315
EA674_14095|hypothetical_protein	58.29	-0.806814	0.234395	-3.44212	0.000577184	0.00391501	79	54	36	48	29	57	40	37	58	107	83	113
EA674_13635|hypothetical_protein	32.8646	-1.00366	0.291752	-3.44011	0.000581479	0.00393905	33	31	28	32	18	27	11	28	17	57	62	74
EA674_12365|type_VI_secretion_system_membrane_subunit_TssM	64.6609	-0.7861	0.228607	-3.43865	0.000584612	0.00395517	90	69	45	67	21	63	41	25	61	132	109	120
EA674_02060|50S_ribosomal_protein_L23	13689.5	0.215715	0.0628008	3.43492	0.000592733	0.00400495	17837	14795	14050	18296	9611	14704	11759	10386	14747	14164	13781	13943
EA674_05735|anthranilate_phosphoribosyltransferase	469.732	0.337681	0.0984008	3.43169	0.000599831	0.0040477	691	515	505	556	313	498	443	327	527	476	450	478
CP039993_2037208_2037375	18.3409	-1.51849	0.442961	-3.42803	0.000607971	0.00409737	10	16	15	21	5	21	8	10	8	17	51	58
EA674_19615|type_IV_conjugative_transfer_system_lipoprotein_TraV	4.07905	4.70759	1.3736	3.4272	0.000609848	0.00410475	6	5	3	6	3	8	6	3	8	0	0	0
EA674_04080|amino_acid_adenylation_domain-containing_protein	10.4117	-1.84221	0.537882	-3.42493	0.000614962	0.00413387	10	7	5	16	2	4	3	3	10	30	25	26
EA674_11360|type_II_asparaginase	689.698	0.366288	0.107033	3.42219	0.0006212	0.00417046	991	845	766	967	462	752	573	435	667	799	625	676
CP039993_72153_72452	84.7763	-0.694828	0.203449	-3.41524	0.000637248	0.00427274	108	62	62	90	58	82	75	59	73	139	139	106
EA674_12785|hypothetical_protein	413.802	-0.487679	0.142825	-3.41453	0.00063893	0.00427855	486	419	399	427	211	408	340	276	320	472	680	766
EA674_16060|3-methyl-2-oxobutanoate_hydroxymethyltransferase	313.164	0.399004	0.116992	3.41052	0.00064838	0.0043363	464	370	313	442	227	349	208	255	335	307	282	312
EA674_03215|entericidin_A/B_family_lipoprotein	1535.65	-0.419916	0.123211	-3.40809	0.000654185	0.00436956	1715	1518	1767	1479	898	1266	1178	879	1477	2774	1936	2347
EA674_15975|phenylalanine--tRNA_ligase_subunit_alpha	362.992	0.374618	0.109951	3.40712	0.000656522	0.00437959	549	398	380	466	230	373	335	264	424	384	330	344
EA674_13205|hypothetical_protein	43.673	0.937753	0.275359	3.40556	0.000660281	0.00439908	56	64	55	53	37	35	36	28	69	39	27	30
EA674_10855|tetraacyldisaccharide_4'-kinase	114.526	0.587673	0.172597	3.40489	0.000661909	0.00440434	163	151	153	149	77	122	97	56	128	105	107	114
EA674_16440|outer_membrane_protein_assembly_factor_BamB	1280.14	0.242683	0.0713268	3.4024	0.000667957	0.00443895	1842	1385	1306	1728	861	1409	1061	897	1383	1333	1280	1356
CP039993_3728539_3728833	97.265	0.653155	0.19207	3.40061	0.000672368	0.00446262	136	130	103	123	97	80	86	68	107	67	86	92
EA674_03855|metalloprotease	15.1685	-1.40339	0.412909	-3.39879	0.00067684	0.00448663	17	10	11	17	5	14	5	6	12	29	34	41
EA674_19385|hypothetical_protein	3.82565	4.806	1.41602	3.39403	0.00068871	0.00455956	6	7	2	7	4	6	0	6	7	0	0	0
EA674_05395|carbon_starvation_protein_A	607.939	-0.378231	0.111505	-3.39206	0.000693695	0.00458678	910	562	511	843	255	707	342	458	535	851	900	884
EA674_06215|type_I_methionyl_aminopeptidase	236.709	0.455835	0.134428	3.39093	0.000696554	0.00459988	407	261	254	328	167	248	182	149	261	234	252	204
EA674_19645|type-F_conjugative_transfer_system_pilin_assembly_protein_TrbC	4.13221	4.70252	1.38776	3.38856	0.000702604	0.00463401	6	6	2	8	3	2	7	5	9	0	0	0
EA674_01525|glutamate_synthase_small_subunit	582.706	0.31608	0.0933165	3.38719	0.00070613	0.00465142	788	610	664	748	430	603	512	380	696	552	562	615
CP039993_1698427_1698512	326.295	0.441555	0.130518	3.38311	0.000716709	0.00471519	439	351	423	421	200	337	292	222	398	343	290	303
EA674_06495|hypothetical_protein	133.978	-0.510036	0.150911	-3.37971	0.000725636	0.00476795	163	123	110	175	82	131	107	90	115	206	172	206
EA674_10695|heme-binding_protein	25.7649	-1.11412	0.32973	-3.3789	0.000727766	0.00477271	21	23	22	26	16	23	22	9	15	50	49	51
EA674_16550|phosphate_acetyltransferase	552.323	-0.398311	0.117887	-3.37874	0.000728179	0.00477271	780	496	499	662	279	603	314	396	560	851	756	797
EA674_05885|DUF4055_domain-containing_protein	22.0302	-1.16714	0.346061	-3.37265	0.00074448	0.00486955	27	18	14	28	9	17	11	10	18	40	54	42
EA674_01320|energy-dependent_translational_throttle_protein_EttA	3905.32	0.282072	0.083638	3.37253	0.00074481	0.00486955	5334	4354	4334	5231	2771	3788	3606	2539	4138	4367	3706	3949
CP039993_24947_25542	42.2222	-0.925005	0.274678	-3.3676	0.00075826	0.0049464	43	46	25	25	22	35	36	26	47	65	76	84
EA674_00645|ion_channel_protein_Tsx	173.057	0.539543	0.160219	3.36753	0.000758448	0.0049464	216	252	172	232	131	165	166	119	197	175	135	151
CP039993_3049574_3049924	811.097	0.30936	0.0919776	3.36343	0.000769813	0.00501429	1159	872	848	1113	571	907	618	702	764	727	816	870
EA674_01250|imidazole_glycerol_phosphate_synthase_subunit_HisH	259.337	0.434426	0.129523	3.35405	0.000796387	0.00518095	410	289	264	381	179	274	174	217	286	269	216	250
EA674_04270|lipoprotein-releasing_ABC_transporter_permease_subunit	212.124	0.411662	0.122784	3.35272	0.000800221	0.00519946	348	252	224	296	136	230	162	147	210	206	211	223
CP039993_3671687_3671742	494.743	0.372189	0.111159	3.34827	0.000813172	0.00527707	720	519	525	682	352	521	422	388	535	533	378	502
EA674_04525|L-aspartate_oxidase	172.569	0.528814	0.158075	3.34535	0.000821798	0.00532647	257	227	174	278	127	156	145	116	183	182	132	159
EA674_09850|uracil-DNA_glycosylase_family_protein	31.8309	-0.976165	0.291932	-3.34381	0.000826369	0.00534949	39	24	20	35	19	29	19	22	29	45	59	64
CP039993_870912_871306	58.7804	-0.782043	0.233984	-3.3423	0.000830883	0.00537209	70	50	52	80	17	43	47	40	49	87	111	109
CP039993_2445778_2445982	335.688	-1.12627	0.337164	-3.34043	0.000836492	0.0054017	429	244	265	413	86	314	178	122	288	475	818	810
EA674_08050|type_II_3-dehydroquinate_dehydratase	358.242	0.399981	0.119952	3.33452	0.000854455	0.00550533	441	417	375	513	250	402	308	313	369	359	319	298
EA674_02170|30S_ribosomal_protein_S4	18103.4	0.224638	0.0673685	3.33446	0.000854637	0.00550533	25211	19325	18792	23832	12848	18841	15634	12924	19314	19885	18102	18214
EA674_12815|LysE_family_translocator	2.57199	-4.82524	1.44746	-3.33359	0.000857321	0.00551585	1	0	0	2	1	0	0	0	0	9	11	12
EA674_17560|50S_ribosomal_protein_L11	11122.9	0.246716	0.0740447	3.33199	0.000862285	0.005541	15513	12648	11104	14945	8116	11693	9316	7763	11689	12077	11421	10781
CP039993_3354099_3354603	655.44	0.300451	0.0902017	3.33088	0.000865727	0.00555632	916	728	615	875	481	728	562	519	708	574	664	662
CP039993_1052403_1052538	96.8086	0.661288	0.198621	3.3294	0.00087034	0.0055791	119	130	112	153	86	89	76	62	115	86	70	84
CP039993_3778796_3778918	213.819	0.434055	0.130398	3.32869	0.000872542	0.0055864	304	271	227	285	143	232	167	177	206	208	217	192
EA674_06970|circularly_permuted_type_2_ATP-grasp_protein	72.5837	-0.767851	0.230789	-3.32707	0.000877658	0.00561231	87	47	72	62	33	65	45	67	68	121	113	130
EA674_19490|hypothetical_protein	3.12306	4.70134	1.41382	3.32528	0.00088329	0.00564145	6	6	2	6	2	4	4	2	6	0	0	0
EA674_18745|methylisocitrate_lyase	241.381	-0.45655	0.137412	-3.32248	0.000892202	0.00569145	307	216	234	339	132	206	168	148	231	406	346	323
CP039993_2187577_2187643	296.722	0.519022	0.156536	3.31568	0.000914209	0.00582475	538	314	272	592	173	326	244	204	283	261	280	256
EA674_00195|4-hydroxy-tetrahydrodipicolinate_reductase	379.718	0.352682	0.106566	3.30951	0.000934602	0.00594747	593	437	393	571	267	392	287	279	346	375	359	419
EA674_07685|helix-turn-helix_domain-containing_protein	8.91878	-2.12767	0.643321	-3.30733	0.000941906	0.00598669	13	3	0	10	1	4	5	6	9	25	23	20
EA674_02145|50S_ribosomal_protein_L15	9952.29	0.252101	0.0762745	3.30518	0.000949168	0.00602555	14034	10643	10345	13492	6912	10824	8240	7314	10437	10966	10056	9418
EA674_01295|two-component_system_response_regulator_OmpR	509.141	-0.32481	0.0983949	-3.30109	0.000963103	0.00610663	705	542	444	667	246	502	319	380	457	748	666	774
EA674_11830|isovaleryl-CoA_dehydrogenase	803.665	-0.394514	0.119573	-3.29935	0.000969079	0.00613711	1127	713	657	1153	370	883	476	604	860	1133	1118	1107
EA674_02165|30S_ribosomal_protein_S11	10696.8	0.258765	0.0785094	3.29597	0.00098081	0.00619798	14907	11604	11657	13756	7488	11389	8946	7629	11235	12130	10465	10552
EA674_03010|carbohydrate_porin	1560.79	-0.229612	0.0696657	-3.29591	0.000981051	0.00619798	2066	1590	1481	2013	954	1497	1104	1114	1475	2117	2006	2121
EA674_08440|IS91_family_transposase	9.13545	2.09574	0.636118	3.29457	0.000985731	0.00622006	20	22	8	17	5	9	9	7	5	3	7	2
EA674_10445|HAD_family_hydrolase	197.558	-0.456169	0.138542	-3.29265	0.000992492	0.0062552	237	181	170	255	113	162	188	123	207	245	299	293
EA674_16485|phosphatase_PAP2_family_protein	67.4816	-0.686354	0.208824	-3.28677	0.00101345	0.00637965	83	76	52	58	46	59	50	25	55	121	108	123
EA674_09000|nuclear_transport_factor_2_family_protein	37.571	-0.939942	0.286009	-3.28641	0.00101475	0.00638016	42	33	22	39	20	26	29	21	52	77	61	53
EA674_02100|50S_ribosomal_protein_L14	12225.8	0.242129	0.073754	3.28293	0.00102735	0.00645167	16730	12465	13454	16427	8396	13274	10507	9147	12510	13009	12189	12319
CP039993_1263640_1264127	8.03205	-4.89606	1.49245	-3.28056	0.00103602	0.00649831	0	0	3	2	0	0	4	1	0	34	41	25
CP039993_143443_143632	434.81	-0.351242	0.107256	-3.2748	0.00105737	0.00661759	580	425	387	564	254	404	287	335	389	524	664	649
EA674_16795|ATP-binding_cassette_domain-containing_protein	254.857	0.395066	0.12064	3.27475	0.00105755	0.00661759	394	309	253	355	182	275	195	172	274	264	243	244
EA714_003525|sensor_histidine_kinase	42.4643	-0.927279	0.283346	-3.27261	0.00106561	0.00666003	66	30	29	49	11	31	19	35	41	83	76	82
CP039993_1097661_1097761	16.9472	1.45737	0.445765	3.26937	0.00107787	0.00672199	23	22	28	24	8	18	16	19	18	13	8	7
EA674_19625|hypothetical_protein	2.83421	4.66837	1.42794	3.26932	0.00107808	0.00672199	8	4	2	6	2	5	2	3	3	0	0	0
EA674_10020|CoA_transferase_subunit_A	1279.19	-0.322618	0.0988496	-3.26372	0.00109959	0.00684801	1591	1136	1104	1807	645	1426	827	1165	1329	1557	1658	1742
EA674_03675|APC_family_permease	588.775	0.312199	0.0956788	3.26299	0.00110244	0.00685761	920	669	579	812	392	686	439	397	636	568	592	642
CP039994_11456_11513	3.10713	4.70557	1.44285	3.2613	0.00110902	0.00689033	6	5	3	6	2	11	1	1	4	0	0	0
EA674_07705|hypothetical_protein	6.92224	-2.41626	0.741287	-3.25954	0.00111592	0.00692502	1	6	3	3	5	8	1	0	6	24	17	16
EA674_02205|hypothetical_protein	145.668	-0.486512	0.149343	-3.25767	0.0011233	0.00696259	194	137	113	193	92	127	95	94	153	199	218	224
CP039993_1261819_1262252	2.86486	4.72164	1.44962	3.25717	0.00112529	0.00696671	6	2	6	3	5	2	1	2	6	0	0	0
EA674_19255|toxin	3.18896	4.72711	1.45218	3.25518	0.0011332	0.00700742	6	1	7	8	1	5	2	2	8	0	0	0
EA674_15385|hypothetical_protein	108.165	-0.552447	0.169772	-3.25406	0.00113769	0.00702567	156	106	83	115	62	105	80	67	77	169	164	187
EA674_06305|alpha/beta_fold_hydrolase	27.1914	-1.04429	0.320947	-3.25377	0.00113883	0.00702567	28	22	18	37	12	29	15	16	27	59	38	48
EA674_19595|conjugal_transfer_protein_TraK	3.07943	4.72171	1.45563	3.24375	0.00117966	0.00726603	6	2	6	1	3	4	6	4	2	0	0	0
EA674_15630|MFS_transporter	35.1049	-0.946476	0.291804	-3.24354	0.00118056	0.00726603	32	30	28	38	19	33	25	19	39	40	65	77
EA674_14800|30S_ribosomal_protein_S12	9947.75	0.213292	0.065776	3.2427	0.00118404	0.00727892	14022	10877	10282	12815	7043	10378	8274	6915	10690	10936	10354	10163
EA674_05350|ATP-dependent_protease	247.698	-0.410358	0.126849	-3.23501	0.00121638	0.007469	283	242	222	342	135	228	172	177	276	311	355	369
EA674_18005|transposase	27.6489	-1.1111	0.343587	-3.23382	0.00122147	0.00749147	18	15	24	38	22	30	21	17	27	48	50	31
CP039993_3169609_3169664	172.7	0.474823	0.146951	3.23117	0.00123283	0.00755228	267	194	182	225	136	192	127	120	204	180	146	152
EA674_03080|translational_GTPase_TypA	6614.56	0.240205	0.0743474	3.23084	0.00123426	0.00755228	9061	7175	6992	8168	5081	6444	6285	4117	7412	7279	6490	6672
CP039993_757370_757467	341.232	0.341058	0.105596	3.22984	0.00123861	0.00757007	524	400	364	423	217	368	257	263	357	343	357	353
EA674_19380|toxic_anion_resistance_protein	3.14768	4.81635	1.49191	3.22832	0.00124521	0.00760158	0	10	4	7	2	2	3	5	3	0	0	0
EA674_19285|hypothetical_protein	2.06968	4.88031	1.51267	3.22629	0.00125406	0.00764673	8	4	4	3	3	2	1	0	1	0	0	0
CP039993_3388051_3388238	268.104	0.400713	0.124216	3.22593	0.00125564	0.00764749	361	289	303	311	194	294	250	207	302	262	231	260
EA674_14540|hypothetical_protein	9.48753	-1.72519	0.53506	-3.2243	0.00126283	0.00767627	9	6	5	6	4	8	6	6	4	27	20	21
CP039993_1453420_1453604	1928.92	0.281488	0.0873049	3.22419	0.00126329	0.00767627	2496	2351	1942	2644	1451	1922	1564	1388	2111	1974	1989	1863
EA674_17095|electron_transfer_flavoprotein-ubiquinone_oxidoreductase	1232.92	0.233812	0.0725317	3.22358	0.00126598	0.0076837	1750	1291	1180	1799	814	1389	979	964	1365	1225	1211	1275
EA674_14790|elongation_factor_G	45380.5	0.212446	0.0659399	3.22181	0.00127383	0.00772244	61848	48460	46710	60885	31783	48516	38833	33031	48009	48948	46549	45159
EA674_13165|TetR/AcrR_family_transcriptional_regulator	2.9204	4.60485	1.43018	3.21976	0.00128296	0.00776881	5	6	2	5	4	4	2	3	3	0	0	0
CP039993_1565107_1565286	14.0562	-1.43967	0.447328	-3.21837	0.00128923	0.00779779	11	12	9	11	9	11	14	2	10	25	28	38
EA674_12860|LysE_family_translocator	134.368	-0.49699	0.154592	-3.21484	0.00130515	0.0078791	184	117	128	143	63	145	93	90	114	210	193	223
EA674_06715|class_I_SAM-dependent_methyltransferase	10.2663	-1.69725	0.527962	-3.21473	0.00130568	0.0078791	11	7	6	5	0	9	4	7	7	21	33	26
EA674_06510|hydrolase	73.6609	0.66585	0.207336	3.21146	0.00132063	0.00796017	116	103	76	118	44	81	46	56	87	67	55	71
CP039993_1765442_1765669	43.6501	0.899912	0.280347	3.21	0.00132737	0.00799161	103	60	63	57	24	32	18	43	27	36	31	58
EA674_06075|aminopeptidase_P_family_protein	204.898	-0.403762	0.125963	-3.20541	0.00134871	0.00811079	280	200	177	255	107	208	152	136	177	281	315	301
CP039993_1102560_1102835	16.8408	-1.35445	0.422701	-3.20428	0.00135401	0.00813336	15	12	12	26	8	10	15	9	6	35	28	41
EA674_17770|homoserine_dehydrogenase	720.41	0.336797	0.105224	3.20076	0.00137064	0.00822382	1111	775	783	1060	458	768	603	496	722	839	643	700
EA674_14590|porphobilinogen_synthase	595.121	0.363674	0.11371	3.19826	0.00138259	0.00828036	1043	652	601	911	314	654	387	482	613	662	559	604
EA674_12735|cysteine--tRNA_ligase	257.697	0.412354	0.128936	3.19813	0.00138322	0.00828036	401	319	256	333	154	273	257	177	262	231	273	254
EA674_19235|ribonuclease_P_protein_component	1338.56	0.278119	0.0870457	3.19509	0.00139787	0.00835854	1722	1572	1371	1646	1116	1264	1258	843	1530	1403	1306	1305
CP039994_68783_68944	1.94923	5.02884	1.5741	3.19474	0.00139954	0.00835906	9	8	1	2	1	0	1	0	4	0	0	0
EA674_05760|hypothetical_protein	2.88464	4.79844	1.50215	3.19437	0.00140134	0.00836028	6	8	1	12	2	3	2	0	4	0	0	0
EA674_19220|tRNA_uridine-5-carboxymethylaminomethyl(34)_synthesis_GTPase_MnmE	159.297	0.465877	0.14588	3.19356	0.0014053	0.00837435	246	204	169	226	102	145	130	117	172	167	155	142
EA674_05255|amino_acid_permease	690.631	-0.683335	0.214109	-3.19153	0.0014152	0.00842238	906	490	564	972	268	738	326	645	657	910	1102	1215
CP039993_1352881_1352965	64.6266	0.726425	0.22763	3.19125	0.00141656	0.00842238	80	99	74	86	53	74	48	43	71	46	57	58
EA674_13630|hypothetical_protein	23.0317	-1.08025	0.338548	-3.19085	0.00141855	0.00842465	30	15	20	17	9	21	13	15	15	41	44	57
EA674_14320|MarC_family_protein	244.428	0.40529	0.12703	3.19051	0.00142021	0.00842498	370	268	244	322	177	230	227	196	271	204	255	229
EA674_11745|hypothetical_protein	3167	-0.393908	0.123825	-3.18116	0.00146688	0.008692	2963	2948	3439	3107	2359	2800	3244	1622	3354	4332	4011	4751
EA674_06080|peptide_MFS_transporter	76.5719	-0.637444	0.20056	-3.17832	0.0014813	0.00876754	84	70	67	75	42	82	66	41	77	106	109	144
EA674_05190|RNA_polymerase-associated_protein_RapA	1048.53	0.245766	0.0774634	3.17267	0.00151044	0.0089223	1537	1074	1073	1452	700	1101	915	755	1144	1089	1017	1107
EA674_08920|hypothetical_protein	77.4676	-0.684999	0.215911	-3.17259	0.00151084	0.0089223	116	56	62	108	44	67	31	52	75	122	128	134
EA674_03910|ATP-dependent_metallopeptidase_FtsH/Yme1/Tma_family_protein	7062.39	-0.195164	0.0615545	-3.17059	0.00152132	0.00897408	8638	7148	6926	8338	4777	6596	6136	4386	7537	8677	9039	9426
EA674_02130|50S_ribosomal_protein_L18	7079.13	0.259551	0.0819487	3.16724	0.00153895	0.00906593	9622	7428	7709	9472	4982	7673	6094	5192	7336	7820	6967	6715
EA674_13160|pirin_family_protein	2.89461	4.63585	1.46381	3.16697	0.00154034	0.00906593	10	1	3	5	1	4	2	4	6	0	0	0
CP039993_3044686_3044780	9386.44	0.210234	0.066394	3.16646	0.00154307	0.00906833	12603	10033	9127	12804	6592	10510	8129	7288	9712	9527	9710	9226
EA674_07035|ubiquinol_oxidase_subunit_II	13655.5	0.20004	0.063179	3.16624	0.00154421	0.00906833	18511	14531	14021	18399	9500	14706	11653	10128	14128	14679	13785	14097
EA674_17890|aminoglycoside_O-phosphotransferase_APH(6)-Id	437.414	0.34188	0.108013	3.16517	0.00154994	0.00909183	592	508	476	633	341	424	368	285	462	453	417	426
CP039993_548832_550083	108.066	-0.54012	0.171159	-3.15566	0.00160134	0.00937722	152	120	84	105	64	87	73	57	98	182	194	156
EA674_00035|ATP-binding_cassette_domain-containing_protein	253.87	0.406449	0.128806	3.15551	0.00160217	0.00937722	410	289	245	324	150	252	231	208	293	232	254	247
EA674_01675|hemerythrin_domain-containing_protein	160.958	-0.462294	0.146569	-3.1541	0.00160994	0.00941226	195	142	152	199	74	149	127	130	151	231	226	243
EA674_02475|30S_ribosomal_protein_S9	4056.83	0.333914	0.105999	3.15015	0.00163184	0.00952965	5125	4820	4377	4835	3455	3805	4002	2507	4507	4590	3697	3595
CP039993_1905998_1906185	63.1763	-0.680134	0.215943	-3.1496	0.00163496	0.00953725	86	65	48	101	24	51	31	42	44	95	113	121
EA674_16725|50S_ribosomal_protein_L33	2346.55	0.284039	0.0902345	3.14778	0.00164513	0.00958595	3433	2447	2558	3074	1741	2395	2018	1639	2406	2667	2270	2232
EA674_15370|NADH-quinone_oxidoreductase_subunit_B	2782.14	0.228371	0.0725822	3.14637	0.0016531	0.00962172	4068	2841	2778	3820	1866	3112	2211	2210	2908	2961	2764	2805
EA674_03070|methyltransferase	364.971	0.349461	0.111374	3.13773	0.0017026	0.00989884	514	453	382	465	271	318	308	249	430	386	373	341
EA674_07770|DUF1376_domain-containing_protein	12.8866	-1.43224	0.457074	-3.13349	0.00172743	0.0100321	15	6	9	16	5	9	4	11	9	26	30	27
EA674_02230|M3_family_metallopeptidase	742.691	-0.382594	0.122155	-3.13204	0.00173596	0.0100705	935	699	626	962	356	772	520	574	847	833	1040	1182
EA674_08755|N-acetyl-gamma-glutamyl-phosphate_reductase	353.486	0.324281	0.103578	3.13079	0.00174339	0.0101024	529	429	371	473	235	349	302	244	349	332	376	394
CP039993_3087766_3087850	1391.57	0.275463	0.088075	3.1276	0.00176241	0.0102014	1856	1520	1441	1702	1047	1452	1289	1102	1407	1387	1334	1424
CP039993_3047568_3047727	6291.59	0.197867	0.0633126	3.12524	0.00177661	0.0102722	8530	6845	6348	8208	4589	6531	5432	4547	6644	6496	6666	6508
EA674_10600|ISC_system_2Fe-2S_type_ferredoxin	169.538	0.463295	0.148418	3.12155	0.00179902	0.0103904	277	177	167	253	129	174	164	118	166	161	147	155
EA674_01260|PanM_family_protein	205.533	0.425519	0.136338	3.12107	0.00180195	0.0103959	334	225	233	258	115	240	152	168	217	219	194	196
EA674_06210|OmpW_family_protein	110.618	0.567819	0.182021	3.11952	0.00181143	0.0104391	139	139	123	162	80	125	116	70	115	96	77	111
EA674_15240|hypothetical_protein	50.8476	-0.738621	0.236921	-3.11759	0.00182338	0.0104964	52	49	43	72	23	39	39	36	41	71	89	91
EA674_15510|hypothetical_protein	88.6485	-0.608935	0.195353	-3.1171	0.00182638	0.0105022	97	101	83	91	46	85	56	35	90	141	130	179
EA674_04560|GTPase_Era	1087.97	0.267874	0.0859526	3.11653	0.0018299	0.0105109	1350	1264	1101	1395	790	1106	1085	730	1258	1031	1093	1103
EA674_01805|hypothetical_protein	256.152	0.402582	0.129353	3.11228	0.00185646	0.0106518	329	292	272	323	191	289	234	193	292	189	248	270
EA674_06285|ABC_transporter_ATP-binding_protein	87.2857	0.571861	0.183855	3.11039	0.00186843	0.0107088	136	109	109	109	61	82	79	58	85	70	93	85
EA674_10580|Fe-S_cluster_assembly_scaffold_IscU	709.173	0.275308	0.0886225	3.10652	0.00189303	0.0108349	1039	797	682	961	447	799	622	504	780	686	744	720
CP039993_2110437_2110801	590.163	-0.399091	0.128479	-3.10628	0.00189456	0.0108349	745	481	554	881	337	582	458	456	473	641	954	836
EA674_03740|succinate_dehydrogenase,_hydrophobic_membrane_anchor_protein	1910.06	0.234237	0.0754577	3.10421	0.00190786	0.0108991	2717	2176	2015	2519	1294	2043	1604	1245	1957	2123	1976	1997
EA674_02880|TonB-dependent_receptor	606.263	0.301747	0.0973756	3.0988	0.00194308	0.0110882	749	725	601	839	445	671	516	476	632	575	595	589
EA674_07145|AMP-binding_protein	932.621	-0.365419	0.117939	-3.09837	0.00194588	0.0110922	1217	883	733	1337	442	1082	572	753	993	1051	1355	1353
CP039993_822077_822317	236.541	0.414592	0.13405	3.09282	0.00198267	0.0112809	343	303	206	298	153	243	232	183	280	223	212	226
EA674_15810|ATP_phosphoribosyltransferase	647.335	0.299142	0.0967245	3.09272	0.0019833	0.0112809	916	688	698	859	523	674	564	427	654	665	621	657
CP039993_674226_674736	312.583	0.376925	0.122004	3.08946	0.00200521	0.0113933	435	396	327	443	243	311	249	224	290	327	300	301
EA674_11200|YebC/PmpR_family_DNA-binding_transcriptional_regulator	489.73	0.292592	0.0947921	3.08667	0.00202412	0.0114883	737	584	507	615	322	499	374	360	525	531	510	504
CP039993_2328581_2328653	14.2081	-1.61312	0.522736	-3.08591	0.00202927	0.0115051	10	19	2	8	12	13	5	7	6	38	34	26
CP039993_2435433_2435503	126.977	-0.597996	0.194145	-3.08016	0.00206889	0.0117004	170	107	104	177	50	150	84	67	131	148	227	219
EA674_08830|3-deoxy-8-phosphooctulonate_synthase	1512.6	0.256147	0.0831704	3.07979	0.00207145	0.0117004	1953	1718	1541	1998	1068	1573	1495	1064	1573	1500	1499	1555
EA674_10155|MBL_fold_metallo-hydrolase	38.6539	1.16531	0.37839	3.07966	0.00207237	0.0117004	54	26	20	64	26	56	32	63	68	9	22	14
EA674_05345|LysR_family_transcriptional_regulator	192.576	-0.441872	0.143489	-3.07948	0.00207362	0.0117004	196	194	181	234	140	197	143	117	178	271	235	309
EA674_08230|PAS_domain-containing_protein	118.652	-0.527804	0.171404	-3.0793	0.00207487	0.0117004	131	114	106	139	60	97	96	68	156	157	183	188
EA674_09560|hypothetical_protein	28.7356	-0.996676	0.323734	-3.07869	0.00207915	0.011712	28	22	28	29	10	25	25	15	22	67	55	40
EA674_13115|hypothetical_protein	208.042	0.389172	0.126445	3.0778	0.00208532	0.0117263	294	259	214	278	150	224	179	142	214	204	195	210
EA674_13570|HeH/LEM_domain_protein	7.31434	-2.01718	0.655423	-3.07768	0.00208617	0.0117263	4	3	8	2	2	3	0	4	6	14	23	28
CP039993_593659_593903	504.746	0.347957	0.113112	3.07621	0.00209648	0.0117717	622	595	566	771	361	517	382	378	550	525	472	472
EA674_02095|30S_ribosomal_protein_S17	15741.1	0.221869	0.0721882	3.07348	0.00211578	0.0118674	21192	16191	16814	22252	10517	17299	12238	12666	16480	16675	16108	15538
CP039993_945380_945458	280.013	0.397197	0.129754	3.06116	0.00220481	0.0123535	341	340	307	387	236	260	244	205	299	250	273	264
EA674_19035|peptidylprolyl_isomerase	292.367	0.347465	0.113607	3.05847	0.00222468	0.0124516	438	342	320	390	183	297	249	208	300	324	291	281
EA674_11790|hypothetical_protein	357.14	-0.423829	0.138722	-3.05525	0.00224873	0.0125615	496	341	263	450	177	407	225	313	311	392	525	599
EA674_16855|translation_initiation_factor_IF-1	960.61	0.329729	0.107927	3.05511	0.00224975	0.0125615	1212	1142	1049	1189	725	919	1020	608	1020	1046	867	923
EA674_01280|acetyl-CoA_hydrolase/transferase_family_protein	3662.87	0.257434	0.0842698	3.05488	0.00225149	0.0125615	5898	3771	3576	5312	2043	4340	2650	2969	3817	3747	3780	3826
EA674_16680|DUF4105_domain-containing_protein	733.22	0.334147	0.109457	3.05278	0.00226734	0.0126326	841	892	798	916	609	690	709	512	806	659	713	746
CP039993_2281837_2282360	479.712	0.347845	0.113963	3.05227	0.00227115	0.0126326	678	572	469	594	335	482	474	395	457	439	474	489
CP039993_775177_775324	1726.86	0.238424	0.0781146	3.05223	0.00227147	0.0126326	2263	1787	1628	2456	1345	1865	1653	1310	1778	1664	1616	1714
EA674_15940|exopolyphosphatase	715.688	0.277612	0.0910088	3.05039	0.00228545	0.0126798	1039	879	724	960	507	668	603	502	706	751	769	740
EA674_11370|RNA_methyltransferase	236.068	0.39436	0.12929	3.05019	0.00228695	0.0126798	292	278	266	307	174	248	209	183	254	202	212	254
EA674_02075|50S_ribosomal_protein_L22	13017.6	0.206802	0.0678032	3.05003	0.00228822	0.0126798	17382	13555	13595	17560	8820	14672	10995	9858	13640	13861	13171	13091
EA674_07350|glutamine--tRNA_ligase/YqeY_domain_fusion_protein	1120.12	0.242519	0.0795184	3.04984	0.00228961	0.0126798	1603	1168	1181	1487	760	1147	974	797	1246	1222	1062	1179
EA674_18015|heteromeric_transposase_endonuclease_subunit_TnsA	143.65	-0.564743	0.185326	-3.0473	0.00230905	0.012774	199	108	109	158	99	165	127	80	125	158	218	255
EA674_18625|amino_acid_permease	249.294	0.397912	0.130655	3.04552	0.00232276	0.0128363	357	227	239	426	183	274	211	225	266	231	198	215
EA674_14695|dUTP_diphosphatase	64.3005	0.67513	0.221818	3.04362	0.00233753	0.0129044	119	84	74	64	36	76	44	47	78	61	54	64
EA674_12110|hypothetical_protein	309.8	-0.32283	0.106111	-3.04238	0.00234716	0.0129439	405	319	306	371	184	280	230	180	289	464	425	449
CP039993_3865183_3865577	236.931	-0.404318	0.133068	-3.03843	0.00237815	0.0131011	354	218	211	254	136	232	158	152	217	391	304	369
EA674_19475|hypothetical_protein	3.69532	4.37514	1.44124	3.03568	0.00239992	0.0132056	5	0	6	4	4	9	5	3	6	0	0	0
EA674_15650|adenosine_deaminase	36.9323	-0.870631	0.286826	-3.0354	0.00240216	0.0132056	53	31	21	41	17	40	18	24	35	49	71	76
EA674_19110|molecular_chaperone_DnaK	4141.41	0.246107	0.0810994	3.03463	0.00240831	0.0132255	6111	4483	3874	5534	2648	4447	3402	3302	4790	3710	4212	4674
EA674_12980|glutathione_S-transferase	251.266	-0.420459	0.138687	-3.03172	0.00243166	0.0133398	303	213	259	286	131	269	200	173	233	295	367	422
EA674_15775|long-chain_fatty_acid_ABC_transporter	64.9368	-0.678987	0.224078	-3.03014	0.00244441	0.0133958	69	62	64	55	27	53	57	50	50	107	104	116
EA674_17705|hypothetical_protein	16.9053	-1.234	0.408258	-3.02261	0.00250606	0.0137193	22	10	8	19	7	14	13	12	16	26	29	41
EA674_19145|hypothetical_protein	205.867	0.400436	0.132525	3.02159	0.00251447	0.013751	323	264	221	265	152	196	150	152	189	226	202	206
EA674_12990|tRNA_(guanosine(46)-N7)-methyltransferase_TrmB	250.875	0.362056	0.119889	3.01993	0.00252832	0.0138123	370	267	279	314	185	266	222	167	277	221	237	283
EA674_02135|30S_ribosomal_protein_S5	11214.2	0.248018	0.08216	3.01872	0.00253841	0.0138531	15498	11957	12366	14879	7605	12068	9318	8094	11662	12864	11103	10885
EA674_03370|rod_shape-determining_protein_MreC	534.944	0.302684	0.100325	3.01702	0.00255272	0.0139167	792	606	579	724	370	481	448	361	601	599	544	517
EA674_08290|3-hydroxyacyl-ACP_dehydratase_FabZ	896.237	0.293789	0.0973946	3.01648	0.00255726	0.013927	1167	1063	937	1189	685	870	864	604	898	945	859	893
CP039994_39059_39112	2.60474	4.54609	1.50794	3.01477	0.00257178	0.0139916	8	3	2	5	0	1	4	2	8	0	0	0
EA674_00070|tyrosine--tRNA_ligase	445.636	0.329839	0.109507	3.01203	0.00259508	0.0140997	725	443	445	588	293	507	376	325	499	443	454	419
EA674_06240|AzlC_family_ABC_transporter_permease	20.9751	1.32584	0.440215	3.0118	0.00259703	0.0140997	43	15	26	32	9	21	23	17	39	10	17	7
EA674_19590|conjugal_transfer_protein_TraE	2.4203	4.50189	1.49591	3.00945	0.00261717	0.0141605	4	6	2	5	4	3	2	0	3	0	0	0
CP039994_27640_27706	3.08782	4.38264	1.45629	3.00945	0.0026172	0.0141605	4	3	4	3	5	7	4	3	1	0	0	0
EA674_00565|DUF445_domain-containing_protein	151.334	-0.498633	0.165703	-3.0092	0.00261941	0.0141605	221	118	146	166	67	133	94	115	156	234	238	232
CP039993_296404_296535	25.4032	1.22191	0.406068	3.00914	0.00261991	0.0141605	24	49	30	32	26	15	24	24	27	22	13	12
CP039993_513735_513841	27.0586	0.9799	0.325664	3.00893	0.00262172	0.0141605	49	40	31	36	12	29	28	23	24	21	19	23
EA674_07615|DNA_polymerase_III_subunit_gamma/tau	329.398	0.322613	0.10723	3.0086	0.0026245	0.014161	454	361	352	490	212	377	265	231	369	314	317	340
EA674_15375|NADH-quinone_oxidoreductase_subunit_A	2080.2	0.224259	0.0745546	3.00798	0.00262987	0.0141754	3218	2187	2042	2904	1359	2232	1642	1589	2089	2234	2158	2162
EA674_12130|PaaI_family_thioesterase	126.445	0.982583	0.326774	3.00692	0.00263909	0.0142105	96	144	182	164	125	125	163	65	193	84	58	91
EA674_01850|glycine--tRNA_ligase_subunit_alpha	837.672	0.253661	0.0844332	3.00428	0.00266206	0.0143195	1143	913	852	1058	664	841	703	620	922	828	850	856
CP039993_3004094_3004200	189.222	0.446868	0.148876	3.00162	0.00268547	0.0144306	312	215	221	235	100	196	131	187	178	172	179	218
EA674_13030|hypothetical_protein	30.6797	-0.896603	0.298965	-2.99903	0.00270844	0.0145392	37	27	23	33	12	25	24	19	25	47	70	50
EA674_17565|transcription_termination/antitermination_protein_NusG	19320.2	0.221413	0.0738447	2.99836	0.00271435	0.014556	24585	21051	18750	25405	14079	20627	17791	15507	20471	17604	19925	20054
CP039993_1315161_1315320	96.0204	0.547191	0.182601	2.99664	0.00272972	0.0146235	163	98	115	141	64	109	79	71	85	74	97	95
EA674_09010|hypothetical_protein	54.7415	-0.690054	0.230305	-2.99626	0.00273316	0.014627	60	62	49	47	29	25	45	31	55	88	107	93
EA674_01770|amino_acid_permease	225.055	-0.405177	0.135272	-2.99529	0.00274188	0.0146587	284	231	186	290	167	204	155	132	210	340	324	295
EA674_02105|50S_ribosomal_protein_L24	19073.6	0.215815	0.0721335	2.99188	0.00277266	0.0148082	24593	19870	20488	25534	13280	20614	16473	14536	20283	20299	18874	19204
EA674_15120|NAD-dependent_DNA_ligase_LigA	208.11	0.382741	0.128276	2.98374	0.00284748	0.0151923	291	257	222	273	131	228	171	161	218	217	184	214
EA674_13595|phage_head_morphogenesis_protein	9.81382	-1.58931	0.53364	-2.97825	0.00289899	0.0154497	8	8	3	10	5	9	7	8	7	19	19	21
CP039993_505261_505433	2264.06	0.353702	0.118773	2.97797	0.0029016	0.0154497	2652	2789	2740	2506	1921	2077	2246	1300	2490	2538	2119	2110
EA674_18145|long-chain-fatty-acid--CoA_ligase	1349.75	-0.237084	0.0796887	-2.97512	0.00292874	0.0155784	1796	1323	1225	1875	733	1383	983	966	1381	1640	1823	1833
EA674_15025|acyl_carrier_protein	1136.37	0.244932	0.0823428	2.97454	0.00293428	0.0155921	1675	1206	1086	1546	798	1175	1051	853	1148	1169	1103	1181
EA674_14925|outer_membrane_protein_assembly_factor_BamD	827.635	0.240099	0.0807909	2.97185	0.00296011	0.0157134	1101	931	878	1069	607	855	698	561	917	834	818	919
EA674_02115|30S_ribosomal_protein_S14	7689.85	0.253789	0.085522	2.96752	0.00300209	0.0159202	10564	8132	8372	10043	5398	8390	6588	5427	8136	8797	7428	7361
EA674_14700|DNA_helicase_Rep	233.878	0.359933	0.121479	2.96292	0.00304738	0.016144	345	277	238	314	173	230	203	160	248	228	244	222
EA674_00400|amino_acid_permease	375.773	0.347541	0.117312	2.96255	0.00305103	0.0161471	526	382	377	536	311	386	391	235	402	369	339	337
EA674_06995|replicative_DNA_helicase	263.989	0.375671	0.12685	2.96153	0.00306115	0.0161843	375	274	284	386	196	266	271	158	292	225	258	264
EA674_07785|hypothetical_protein	5.93943	-2.08749	0.705859	-2.95738	0.00310269	0.0163875	4	3	3	7	4	1	3	2	6	14	17	13
EA674_15425|sensor_histidine_kinase	76.6313	-0.59201	0.200399	-2.95416	0.00313523	0.0165427	85	82	63	79	36	73	66	56	60	111	128	122
EA674_04405|deoxyguanosinetriphosphate_triphosphohydrolase	99.8894	-0.54415	0.184471	-2.9498	0.00317984	0.0167612	104	102	83	93	70	100	102	44	102	135	152	153
EA674_15310|uracil_phosphoribosyltransferase	526.678	0.28548	0.0968829	2.94664	0.00321243	0.016916	705	624	532	698	357	558	469	385	562	470	565	556
EA674_00010|DNA_polymerase_III_subunit_beta	408.853	0.291055	0.0988182	2.94536	0.00322578	0.0169693	572	481	419	585	274	423	338	278	446	416	413	421
EA674_16685|peptide-methionine_(S)-S-oxide_reductase_MsrA	937.002	0.257244	0.0873567	2.94475	0.00323211	0.0169767	1274	1030	989	1328	643	952	851	613	1028	1009	873	986
EA674_08295|acyl-ACP--UDP-N-acetylglucosamine_O-acyltransferase	1033.66	0.276289	0.0938289	2.94461	0.00323365	0.0169767	1297	1166	1011	1434	839	1129	944	735	1065	973	1045	972
EA674_00455|transcription_antitermination_factor_NusB	556.593	0.34383	0.116781	2.94423	0.00323758	0.0169803	776	681	577	709	445	549	476	368	582	649	525	489
EA674_18350|F0F1_ATP_synthase_subunit_beta	11405.3	0.220288	0.0748823	2.94178	0.00326329	0.0170916	15043	13044	11676	15398	7966	12269	9611	8259	11643	12638	11553	11347
CP039993_2315591_2315685	126.543	-0.957437	0.325483	-2.94159	0.00326532	0.0170916	167	124	98	159	36	116	29	60	110	207	287	284
EA674_03210|succinyl-diaminopimelate_desuccinylase	197.192	0.406685	0.138655	2.93306	0.00335638	0.0175508	288	246	187	241	146	214	166	159	203	194	163	207
CP039993_3802128_3802624	67.1671	0.701825	0.239442	2.93109	0.00337777	0.0176451	100	74	84	74	50	59	69	67	64	68	45	52
CP039993_2279172_2279386	51.8818	-0.830914	0.283952	-2.92625	0.00343075	0.017904	65	31	42	41	28	50	29	37	78	82	65	106
EA674_12855|hypothetical_protein	136.547	-0.549349	0.188092	-2.92064	0.00349316	0.0182116	159	160	95	134	84	130	104	93	121	147	225	259
EA674_12185|1,2-phenylacetyl-CoA_epoxidase_subunit_B	895.438	-0.284877	0.0975807	-2.9194	0.00350706	0.0182659	1227	782	850	1184	441	986	621	717	850	1216	1201	1173
CP039993_1626725_1626837	6.91813	-1.90091	0.651491	-2.91778	0.00352533	0.0183429	2	5	6	5	2	6	1	4	7	17	17	18
EA674_04050|tRNA_2-thiocytidine(32)_synthetase_TtcA	777.21	0.229497	0.078721	2.91532	0.00355325	0.0184698	1096	901	795	993	544	745	691	504	862	802	815	857
CP039993_1223999_1224055	1.65932	4.60988	1.58382	2.91061	0.0036072	NA	5	5	3	1	1	4	1	0	1	0	0	0
EA674_01290|HAMP_domain-containing_protein	249.734	-0.360055	0.123936	-2.90517	0.00367056	0.0190608	295	243	220	327	157	267	177	176	245	380	301	329
EA674_16065|2-amino-4-hydroxy-6-_hydroxymethyldihydropteridine_diphosphokinase	145.21	0.450067	0.154962	2.90437	0.00367996	0.0190907	232	176	154	212	107	141	98	100	160	149	120	157
CP039993_3743403_3743530	225.576	0.427859	0.147525	2.90024	0.00372874	0.0193247	286	296	291	317	169	222	167	152	196	245	212	227
EA674_01050|FAD-binding_protein	354.091	0.314359	0.108441	2.89889	0.00374484	0.019389	532	412	356	503	200	387	255	307	364	364	365	352
EA674_12140|phenylacetic_acid_degradation_operon_negative_regulatory_protein_PaaX	968.549	0.563248	0.194379	2.89767	0.00375945	0.0194264	1059	1094	1261	1175	884	891	1171	571	1032	766	775	928
CP039993_1692330_1692442	79.8896	0.59987	0.207018	2.89767	0.00375948	0.0194264	119	91	78	136	64	89	70	63	72	70	73	53
CP039993_1299019_1299228	1726.52	0.335581	0.115849	2.8967	0.00377114	0.0194675	2278	2151	1958	2158	1348	1753	1410	1090	1769	2111	1570	1613
EA674_00465|bifunctional_3,4-dihydroxy-2-butanone-4-phosphate_synthase/GTP_cyclohydrolase_II	1663.06	0.252347	0.087183	2.89445	0.00379825	0.0195816	2330	1793	1778	2248	1146	1762	1410	1169	1747	1923	1602	1614
CP039993_2188381_2188466	267.633	0.431005	0.148926	2.8941	0.0038025	0.0195816	462	266	266	491	161	255	207	216	273	274	238	241
EA674_01570|RidA_family_protein	228.571	0.376325	0.130039	2.89394	0.00380442	0.0195816	343	229	233	322	160	248	179	203	247	231	201	208
EA674_15740|methyltransferase	61.6041	0.616723	0.213195	2.89277	0.00381865	0.0196339	102	77	71	81	47	59	48	48	56	55	54	60
CP039993_2721117_2721179	2.60117	4.45344	1.53966	2.89249	0.00382206	0.0196339	6	5	1	4	0	1	2	4	9	0	0	0
CP039993_1687996_1688140	51.5287	-0.689895	0.238603	-2.89139	0.0038354	0.0196831	52	45	55	57	27	51	24	42	39	72	85	101
EA674_17285|translation_initiation_factor_IF-2	13062.8	0.227519	0.0787053	2.89078	0.00384289	0.0196975	17233	14858	14038	16608	9313	12701	11930	8652	14225	14886	13107	13108
CP039993_368752_368879	109.582	0.582969	0.201696	2.89033	0.00384833	0.0196975	142	174	135	134	84	123	59	89	87	115	104	98
EA674_10645|30S_ribosomal_protein_S20	3497.65	0.26744	0.0925322	2.89024	0.00384946	0.0196975	4675	3927	3769	4414	2788	3264	3267	2197	3837	4052	3266	3389
EA674_12510|sel1_repeat_family_protein	10.2409	-1.676	0.579963	-2.88984	0.00385442	0.0197037	15	4	2	8	3	13	5	5	13	24	26	16
CP039993_3048102_3048302	2183.52	0.205642	0.071187	2.88876	0.00386768	0.0197387	3069	2388	2138	2852	1589	2363	1920	1467	2312	2158	2349	2315
EA674_07725|hypothetical_protein	12.0869	-1.33604	0.462511	-2.88867	0.00386879	0.0197387	16	9	11	7	3	2	5	5	9	21	38	35
EA674_17245|ATP-binding_protein	165.863	-0.420354	0.145551	-2.88801	0.00387689	0.0197608	193	162	162	220	77	158	119	112	170	229	261	231
CP039993_3160206_3160290	862.433	0.258286	0.0894446	2.88766	0.00388116	0.0197634	1213	897	808	1142	633	978	697	731	937	839	852	828
EA674_05755|hypothetical_protein	2.30802	4.54829	1.57658	2.88491	0.00391523	0.0199176	7	6	0	8	2	2	3	0	2	0	0	0
EA674_13950|citrate_transporter	454.962	0.308196	0.106842	2.88458	0.00391934	0.0199192	720	501	443	697	281	483	354	343	466	497	455	429
EA674_12155|3-hydroxyacyl-CoA_dehydrogenase	2578.61	0.260467	0.0903653	2.88238	0.00394682	0.0200395	3147	2515	2964	3289	1989	2542	2569	1803	2995	2525	2427	2612
CP039993_3171220_3171447	846.883	0.304109	0.105522	2.88196	0.00395206	0.0200467	1114	976	955	1037	674	808	750	578	882	969	806	801
CP039993_345516_345662	1382.63	0.301675	0.10472	2.88077	0.00396711	0.0201036	1852	1564	1617	1652	1108	1284	1302	924	1315	1529	1359	1383
EA674_14830|NAD+_synthase	1019.11	-0.214494	0.0745739	-2.87627	0.00402407	0.0203726	1257	1010	952	1212	747	957	882	634	1077	1263	1250	1373
EA674_18725|hypothetical_protein	17.7986	-1.20176	0.417874	-2.8759	0.00402879	0.0203768	21	12	8	29	11	21	7	9	16	42	22	32
EA674_05175|glutamate-1-semialdehyde_2,1-aminomutase	621.131	0.255866	0.0890167	2.87436	0.00404842	0.0204553	872	670	682	812	426	623	535	409	710	673	603	661
EA674_07340|UDP-2,3-diacylglucosamine_diphosphatase	105.014	0.489839	0.170433	2.87408	0.00405211	0.0204553	181	139	101	128	66	111	88	71	113	104	94	111
CP039993_430991_431242	9381.53	0.258093	0.0898611	2.87213	0.00407719	0.0205622	12537	10343	10934	11589	6603	9602	7839	6576	9813	11027	9069	9467
CP039993_3447186_3447616	116.887	0.527864	0.183853	2.87112	0.00409025	0.0206083	168	127	140	149	66	140	125	85	121	111	81	123
EA674_01015|amino_acid_permease	1491.82	0.231268	0.0805683	2.87046	0.00409877	0.0206314	1901	1661	1572	2170	992	1629	1230	1145	1516	1607	1460	1500
CP039993_3697200_3697410	58.3889	0.764989	0.266994	2.86519	0.00416761	0.0209578	78	101	69	78	52	45	39	27	77	66	48	39
EA674_19345|hypothetical_protein	2.66043	4.4667	1.55967	2.86388	0.00418488	0.0210245	11	2	0	7	0	2	4	4	4	0	0	0
EA674_02480|50S_ribosomal_protein_L13	9873.56	0.31281	0.109243	2.86343	0.00419086	0.0210344	11578	11851	10962	11743	8385	9318	9869	6201	10705	10971	8948	9244
CP039993_81766_82016	116.733	0.507244	0.177261	2.86157	0.00421547	0.0211377	163	128	115	180	94	104	113	76	160	99	77	121
CP039993_3633514_3633622	13568.2	0.195345	0.0682789	2.86099	0.00422323	0.0211564	17311	14842	13165	17805	9886	14445	12147	10727	14332	13218	13864	14162
EA674_15915|DNA_polymerase_I	599.79	0.276962	0.0968219	2.86053	0.00422931	0.0211667	832	714	638	791	401	616	550	362	646	657	579	641
EA674_15920|YggT_family_protein	95.4989	0.57369	0.200658	2.85905	0.00424913	0.0212323	159	94	122	157	63	106	84	59	85	96	93	71
EA674_03865|universal_stress_protein	56.2714	-0.659399	0.230644	-2.85895	0.0042505	0.0212323	71	55	47	78	17	58	37	34	47	76	89	119
EA674_11010|tRNA_(uridine(54)-C5)-methyltransferase_TrmA	164.298	0.426322	0.149188	2.85761	0.00426841	0.0213015	231	216	158	220	116	139	162	123	181	145	160	163
EA674_08015|hypothetical_protein	79.5365	-0.59229	0.207332	-2.85672	0.00428037	0.0213409	88	83	52	89	55	85	66	59	61	95	120	134
EA674_19105|nucleotide_exchange_factor_GrpE	499.743	0.312546	0.109563	2.85267	0.00433542	0.0215948	754	558	473	794	277	532	392	399	570	441	491	553
CP039993_83693_83780	237.119	0.440981	0.154611	2.85219	0.00434188	0.0216065	302	240	292	310	194	221	244	164	263	265	181	197
EA674_12795|hypothetical_protein	84.4732	0.629089	0.220637	2.85124	0.00435497	0.0216512	162	94	87	149	54	84	70	61	72	50	94	83
CP039994_30996_31141	2.28785	4.34166	1.52377	2.84928	0.00438185	0.0217588	5	5	1	8	2	1	2	1	4	0	0	0
EA674_18770|alpha-hydroxy-acid_oxidizing_protein	39.0039	0.798316	0.280204	2.84906	0.00438491	0.0217588	72	48	39	64	25	59	19	37	29	35	23	36
EA674_05680|uroporphyrinogen_decarboxylase	192.191	0.406231	0.142673	2.84729	0.00440937	0.0218595	283	232	194	298	136	198	158	129	200	214	161	179
CP039993_2605819_2606071	61.728	-0.633174	0.22246	-2.84624	0.00442394	0.021911	81	50	39	73	41	68	49	42	59	76	103	91
EA674_15365|NADH-quinone_oxidoreductase_subunit_C/D	4829.71	0.202883	0.0712962	2.84563	0.00443235	0.021932	6846	5144	5073	6724	3100	5257	3857	3473	5059	5502	4787	5080
EA674_10585|iron-sulfur_cluster_assembly_protein_IscA	637.579	0.258393	0.0909331	2.84157	0.00448922	0.0221869	860	688	599	897	450	705	522	553	676	567	641	654
EA674_12485|SRPBCC_family_protein	56.5322	-0.639224	0.224972	-2.84135	0.00449231	0.0221869	57	65	47	62	34	53	32	34	54	100	87	88
EA674_03155|DUF1508_domain-containing_protein	54.9615	-0.666416	0.234649	-2.84006	0.00451051	0.0222558	80	41	42	72	23	48	42	36	54	90	94	80
CP039993_814875_815009	1464.48	-0.202228	0.0713089	-2.83594	0.00456909	0.0225237	1820	1497	1408	1765	956	1317	1222	980	1567	1767	1917	1979
CP039993_2259791_2260264	9.3332	-1.51217	0.534114	-2.83118	0.00463768	0.0228403	8	6	9	10	6	7	2	2	4	19	22	28
CP039993_3753031_3753375	152.96	-0.413061	0.145959	-2.82997	0.00465521	0.0229052	179	135	143	180	101	164	124	93	154	224	186	223
CP039993_742146_742331	22.5575	-1.02836	0.363568	-2.82852	0.00467632	0.0229836	26	12	19	27	8	13	19	21	20	38	40	42
EA674_13855|adenylate_kinase	731.071	0.25718	0.0909316	2.82828	0.0046799	0.0229836	1105	766	737	968	530	728	595	538	803	789	745	715
EA674_13240|DUF898_domain-containing_protein	5.1126	-2.21089	0.782173	-2.8266	0.00470448	0.0230827	1	4	4	2	2	0	2	4	2	11	16	18
EA674_16445|tetratricopeptide_repeat_protein	797.391	0.218181	0.077309	2.82219	0.00476968	0.0233808	1094	875	784	1103	544	860	650	610	859	796	799	862
EA674_18810|polysaccharide_biosynthesis_protein	776.712	-0.247634	0.0877575	-2.82181	0.00477542	0.0233871	877	798	716	1034	510	726	683	503	827	967	963	1037
EA674_11340|glutathione_peroxidase	272.028	-0.377669	0.133877	-2.82101	0.00478726	0.0234161	382	247	222	377	123	316	171	229	237	302	401	435
EA674_05375|EAL_domain-containing_protein	117.542	-0.443564	0.157247	-2.82081	0.00479027	0.0234161	143	113	97	132	78	114	93	73	126	176	158	163
EA674_11325|succinyldiaminopimelate_transaminase	385.964	0.29998	0.10642	2.81881	0.00482014	0.0235389	531	428	414	564	242	447	305	263	437	376	401	383
EA674_07480|hypothetical_protein	166.543	-0.505226	0.179251	-2.81853	0.00482435	0.0235389	275	159	112	229	69	156	84	157	105	262	286	234
EA674_06530|sulfur_carrier_protein_ThiS	251.659	0.348722	0.123743	2.81811	0.00483078	0.0235484	367	263	283	302	187	245	235	191	259	257	241	246
EA674_03050|OmpA_family_protein	27432	-0.15533	0.0551488	-2.81656	0.0048541	0.0236401	34991	28284	26352	34225	17651	27089	21959	19397	27103	33312	34684	35858
EA674_02575|dihydrolipoyl_dehydrogenase	92.3673	-0.506338	0.180201	-2.80985	0.00495638	0.0241159	99	83	88	100	72	83	77	54	87	116	137	148
EA674_15805|histidinol_dehydrogenase	485.93	0.273101	0.0972933	2.80699	0.00500067	0.0243088	645	542	520	676	345	524	419	316	535	484	501	487
CP039993_3919803_3919868	79.2015	-0.565719	0.201611	-2.806	0.00501615	0.0243615	99	65	48	134	44	90	68	58	69	107	97	118
EA674_01995|glycerol-3-phosphate_1-O-acyltransferase_PlsB	658.457	0.253838	0.0904761	2.80558	0.00502254	0.02437	939	732	656	898	473	721	515	441	750	699	634	689
EA674_05075|peptidylprolyl_isomerase	3721.16	0.208491	0.0744629	2.79993	0.00511131	0.0247561	5240	4054	3995	4483	2818	3537	3418	2362	3924	4200	3796	3950
EA674_09015|SDR_family_oxidoreductase	55.276	-0.642852	0.229597	-2.79992	0.00511155	0.0247561	71	43	60	64	31	45	45	24	39	97	93	92
EA674_10570|Rrf2_family_transcriptional_regulator	835.927	0.252357	0.0902001	2.79774	0.0051461	0.0249005	1252	916	868	1188	471	903	663	634	883	943	799	894
CP039993_3864330_3864673	225.735	-0.462618	0.166044	-2.78612	0.00533433	0.0257875	344	192	215	242	96	208	141	178	191	437	284	338
EA674_03775|dihydrolipoyl_dehydrogenase	7301.14	0.206185	0.0740563	2.78417	0.00536644	0.0259188	9540	7565	7615	10075	5261	7804	6519	5363	7565	7864	7167	7277
EA674_06980|transglutaminase_family_protein	132.186	-0.508986	0.182854	-2.78356	0.00537654	0.0259438	186	108	103	205	46	126	83	123	124	168	183	229
EA674_02070|30S_ribosomal_protein_S19	8746.87	0.199836	0.0718214	2.7824	0.0053959	0.0259897	12374	8861	8976	12170	5852	9451	7332	6572	9217	9652	8855	8688
EA674_17290|transcription_termination/antitermination_protein_NusA	6656.83	0.245955	0.0883969	2.78239	0.00539596	0.0259897	8128	7609	7087	8140	5262	6426	6761	4178	7389	7018	6690	6466
EA674_16330|protein-export_chaperone_SecB	1106.64	0.216679	0.0779997	2.77795	0.00547037	0.026324	1420	1183	1160	1396	778	1144	1022	804	1273	1072	1106	1204
EA674_06975|hypothetical_protein	45.5501	-0.787023	0.283442	-2.77667	0.00549192	0.0264015	68	39	26	49	22	50	34	34	25	52	82	100
EA674_09025|flavin_reductase_family_protein	72.4487	-0.597164	0.215086	-2.77639	0.00549654	0.0264015	98	59	66	79	35	75	40	43	81	135	109	103
EA674_19525|hypothetical_protein	2.1198	4.20328	1.51629	2.77209	0.00556975	0.0267287	5	3	2	3	1	1	5	2	3	0	0	0
EA674_02215|TRAP_transporter_large_permease_subunit	197.575	-0.373457	0.134803	-2.77039	0.00559886	0.0268438	267	207	172	247	87	200	144	122	200	270	287	309
EA674_01185|aquaporin_Z	26.1373	-0.894352	0.322921	-2.76957	0.00561299	0.0268871	34	18	27	33	8	20	12	15	22	41	61	50
EA674_04060|transporter_substrate-binding_domain-containing_protein	124.703	0.516939	0.186772	2.76776	0.00564433	0.0270125	160	153	135	122	145	101	146	62	133	107	120	100
CP039993_1943852_1943932	4.78976	-3.06379	1.10716	-2.76724	0.00565326	0.0270306	3	0	0	7	6	1	3	0	15	9	7	9
EA674_19640|conjugal_transfer_protein	2.86415	4.08108	1.47587	2.76521	0.00568855	0.0271746	4	1	4	9	2	7	0	6	1	0	0	0
EA674_13060|cAMP-activated_global_transcriptional_regulator_CRP	749.795	-0.227123	0.0821627	-2.76431	0.00570431	0.0272251	917	769	704	934	489	753	594	500	757	999	910	1003
EA674_11560|biotin-independent_malonate_decarboxylase_subunit_beta	13.4486	-1.30348	0.471675	-2.76351	0.00571828	0.027267	14	13	9	10	4	8	5	5	17	28	18	47
EA674_05725|DNA_mismatch_repair_protein_MutS	170.81	0.407778	0.147591	2.76289	0.00572922	0.0272944	259	200	171	222	130	154	188	99	184	150	181	160
EA674_04640|lipocalin_family_protein	100.544	-0.47243	0.17109	-2.76129	0.00575727	0.0273905	125	102	90	115	56	93	70	71	86	173	136	147
EA674_08660|GNAT_family_N-acetyltransferase	44.5862	-0.71234	0.257987	-2.76115	0.00575983	0.0273905	41	47	42	52	23	51	31	17	40	73	74	77
CP039993_665336_665402	62.7645	0.612835	0.221986	2.7607	0.00576781	0.0274036	94	76	80	89	40	59	59	45	61	60	65	45
EA674_10325|YARHG_domain-containing_protein	298.066	0.329148	0.119318	2.75858	0.00580531	0.0275493	430	326	288	422	174	327	287	223	346	260	303	297
CP039993_2643865_2644021	69.1043	0.627655	0.227545	2.75837	0.00580897	0.0275493	139	84	75	114	30	82	55	37	70	54	63	81
EA674_15170|hypothetical_protein	32.6502	-0.780241	0.283006	-2.75698	0.00583384	0.0276147	35	32	28	43	12	39	22	17	22	54	58	58
EA674_09020|oxidoreductase	73.0544	-0.640093	0.23218	-2.75689	0.00583548	0.0276147	102	67	53	77	50	82	59	30	51	130	126	97
EA674_08010|hypothetical_protein	85.8577	-0.536157	0.194491	-2.75671	0.00583854	0.0276147	101	91	56	87	67	69	67	63	88	111	127	134
EA674_08335|hypothetical_protein	7.89633	-1.6232	0.589655	-2.7528	0.00590874	0.0279216	8	7	3	6	5	7	4	4	1	20	17	20
EA674_02655|bifunctional_phosphopantothenoylcysteine_decarboxylase/phosphopantothenate--cysteine_ligase_CoaBC	189.129	0.385562	0.140091	2.75223	0.00591912	0.0279455	295	220	211	269	102	189	167	138	190	213	163	200
EA674_10790|tRNA_adenosine(34)_deaminase_TadA	150.84	0.43948	0.15986	2.74915	0.00597501	0.028184	191	198	156	185	95	149	148	122	176	153	131	136
EA674_17895|hypothetical_protein	109.951	0.492923	0.179496	2.74615	0.00602996	0.0284177	149	162	114	139	81	116	79	79	118	118	101	96
EA674_05895|hypothetical_protein	8.87129	-1.56271	0.569349	-2.74474	0.00605594	0.0285145	12	3	6	9	7	8	2	3	3	23	18	22
CP039993_2634297_2634510	164.937	0.427763	0.155983	2.74238	0.00609958	0.0286942	218	199	191	231	112	142	164	132	155	163	148	162
EA674_14330|BCCT_family_transporter	1740.95	0.234949	0.0857221	2.74082	0.00612862	0.028805	2345	1866	1966	2073	1232	1759	1704	1056	1929	1809	1851	1818
EA674_05235|aspartate_aminotransferase_family_protein	4328.02	0.18746	0.0684386	2.73909	0.00616092	0.028931	6007	4655	4567	5633	3110	4369	3690	2811	4728	4838	4446	4607
EA674_11515|cytochrome_d_ubiquinol_oxidase_subunit_II	204.01	-0.358775	0.131049	-2.73772	0.00618672	0.0290262	289	194	183	260	109	210	142	118	204	277	275	330
CP039520_462654_463245	11.2665	-1.48728	0.543336	-2.73731	0.00619442	0.0290363	12	8	6	11	3	11	1	6	16	15	32	28
EA674_00800|TonB-dependent_siderophore_receptor	72.9857	0.557031	0.203891	2.732	0.00629513	0.0294821	102	98	77	92	48	91	58	61	71	65	69	62
CP039993_575780_575947	156.78	-0.45469	0.166535	-2.7303	0.00632771	0.0296083	224	112	117	215	76	193	113	129	161	186	228	219
CP039993_1628588_1628652	9.58547	-1.41071	0.51726	-2.72727	0.00638617	0.0298552	11	5	9	7	3	4	4	7	6	18	24	27
EA674_13080|adenylosuccinate_synthase	3796.14	0.202697	0.0744325	2.72323	0.00646467	0.0301953	5417	3991	3940	5098	2608	3886	3358	2554	4069	4294	3816	3895
EA674_16530|gluconate_permease	547.709	-0.266264	0.0978635	-2.72077	0.00651291	0.0303936	644	606	527	629	369	529	391	354	540	752	696	787
CP039993_1713736_1713850	3.52562	-2.81394	1.03468	-2.71962	0.00653566	0.0304727	2	1	1	5	4	1	0	1	2	6	12	11
CP039993_540885_540983	83.5358	0.55029	0.202427	2.71846	0.00655861	0.0305525	111	115	99	118	55	73	63	67	94	87	81	64
EA674_10455|acetyltransferase	90.8094	0.577077	0.212403	2.71689	0.00658978	0.0306477	111	105	108	89	84	107	94	68	89	85	67	76
EA674_14995|GDYXXLXY_protein	24.8977	-0.999623	0.367935	-2.71685	0.00659072	0.0306477	20	23	13	26	19	25	23	19	21	21	49	47
EA674_01310|SDR_family_NAD(P)-dependent_oxidoreductase	148.024	-0.444886	0.163934	-2.71381	0.00665139	0.0309025	221	130	152	170	72	142	108	85	102	275	201	229
CP039993_769074_769357	18.5194	1.19729	0.441241	2.71346	0.00665855	0.0309084	31	33	16	21	12	22	7	23	24	16	10	10
EA674_18380|F0F1_ATP_synthase_subunit_A	6649.92	0.209253	0.0771512	2.71224	0.00668297	0.0309643	9005	7278	6933	8882	4745	6820	5740	4813	6749	7546	6646	6678
EA674_13175|SDR_family_NAD(P)-dependent_oxidoreductase	2.06352	4.37019	1.61131	2.7122	0.00668382	0.0309643	4	5	2	5	1	0	0	2	7	0	0	0
EA674_03700|RNA_polymerase_sigma_factor_RpoD	3766.34	0.179825	0.0663076	2.71198	0.00668828	0.0309643	5606	3957	3601	5094	2500	3874	3279	2650	4141	3759	3924	4303
EA674_13955|hypothetical_protein	116.49	0.460656	0.170015	2.7095	0.00673838	0.0311687	158	147	134	180	71	109	104	81	126	94	114	126
CP039994_30566_30711	1.99704	4.27346	1.57802	2.70812	0.00676657	0.031257	3	2	5	0	1	2	4	3	2	0	0	0
EA674_09190|catalase	11.3927	-1.44107	0.532157	-2.70798	0.00676938	0.031257	4	11	6	13	11	7	11	4	13	17	14	30
EA674_19550|hypothetical_protein	2.08095	4.36992	1.61449	2.70668	0.00679593	0.0313521	5	1	5	2	3	2	0	5	0	0	0	0
EA674_02160|30S_ribosomal_protein_S13	10330.3	0.242254	0.0895509	2.70521	0.00682612	0.0314637	14344	11520	11298	12967	7305	10851	8394	7107	10944	12497	9931	10232
EA674_11840|enoyl-CoA_hydratase/isomerase_family_protein	404.075	-0.298373	0.110492	-2.70039	0.00692572	0.0318948	609	373	336	514	232	443	265	292	372	536	536	588
EA674_08585|heme-binding_protein	1000.9	-0.264012	0.0977833	-2.69997	0.00693461	0.0319077	1139	1051	1034	1061	680	916	884	601	970	1423	1287	1352
CP039993_3166445_3166774	841.33	0.255981	0.0948196	2.69966	0.00694109	0.0319096	1110	830	869	1015	636	866	891	620	942	743	811	896
EA674_11825|TetR/AcrR_family_transcriptional_regulator	985.447	-0.302437	0.112127	-2.69727	0.00699099	0.0321109	1410	942	761	1397	464	1085	676	778	1008	1158	1359	1412
EA674_01460|phospho-N-acetylmuramoyl-pentapeptide-_transferase	494.418	0.266406	0.0987869	2.69678	0.00700138	0.0321238	658	578	520	685	344	537	417	324	524	529	495	497
EA674_03905|23S_rRNA_(uridine(2552)-2'-O)-methyltransferase_RlmE	1962.48	-0.195926	0.0726579	-2.69656	0.00700604	0.0321238	2339	2040	1909	2384	1269	1887	1680	1309	2004	2360	2463	2711
CP039993_542117_542292	67.9805	0.607135	0.225246	2.69543	0.00702984	0.0322048	98	83	86	72	38	74	53	50	100	68	56	59
EA674_17910|ArsR_family_transcriptional_regulator	18.5571	1.07927	0.400763	2.69305	0.00708026	0.0323892	24	27	27	25	18	14	15	14	20	12	12	15
EA674_01940|lipid_asymmetry_maintenance_ABC_transporter_permease_subunit_MlaE	192.553	0.36601	0.135915	2.69293	0.00708265	0.0323892	283	229	219	251	125	195	173	122	199	220	167	203
EA674_05415|hypothetical_protein	52.9284	-0.653598	0.242734	-2.69265	0.00708861	0.0323892	74	45	42	93	13	61	26	33	45	90	82	88
EA674_18440|glutathione_S-transferase	143.888	-0.427238	0.158874	-2.68916	0.00716325	0.0327018	177	129	141	172	72	125	108	103	157	191	181	255
CP039993_332200_332444	547.292	0.373773	0.139014	2.68875	0.00717191	0.0327129	881	500	466	877	347	599	467	532	615	368	528	559
EA674_10680|ABC_transporter_permease	44.2452	-0.732846	0.272907	-2.68533	0.00724577	0.0330211	39	37	49	58	26	31	32	24	43	81	51	88
EA674_15745|tRNA_(adenosine(37)-N6)-threonylcarbamoyltransferase_complex_dimerization_subunit_type_1_TsaB	134.965	0.429607	0.160105	2.68328	0.00729039	0.0331342	194	172	136	177	86	122	118	107	162	144	113	130
CP039993_298278_298394	111.908	-0.523204	0.194991	-2.68323	0.00729155	0.0331342	128	102	90	119	67	95	119	91	91	132	183	162
CP039993_845267_845373	22.034	-1.10213	0.41075	-2.68321	0.00729181	0.0331342	21	16	13	17	16	13	10	26	27	44	26	41
EA674_14270|crotonase/enoyl-CoA_hydratase_family_protein	14.6261	-1.19365	0.444889	-2.68303	0.00729584	0.0331342	17	12	5	26	7	15	10	8	10	29	29	21
EA674_02730|branched-chain_amino_acid_transaminase	1094.91	-0.252664	0.0943209	-2.67877	0.00738926	0.0335295	1331	1112	1048	1286	753	1074	985	608	1081	1546	1356	1429
EA674_06475|acyl-CoA_dehydrogenase	122.059	-0.449485	0.167814	-2.67848	0.0073958	0.0335302	161	109	99	163	59	105	93	108	115	168	160	192
EA674_00845|helix-turn-helix_transcriptional_regulator	96.1576	0.518241	0.193558	2.67745	0.00741859	0.0336045	159	113	105	108	56	97	87	74	116	109	66	97
EA674_06280|ABC_transporter_permease	81.3589	0.53691	0.200733	2.67475	0.00747856	0.0338469	118	86	93	89	59	93	82	69	83	65	69	79
CP039993_231375_231652	118.964	-0.448508	0.167739	-2.67385	0.00749865	0.0339086	145	122	101	138	70	103	71	84	140	161	185	175
EA674_18090|DDE-type_integrase/transposase/recombinase	344.167	-0.304886	0.114041	-2.67348	0.00750678	0.0339162	399	337	297	419	261	312	312	247	323	421	416	492
CP039993_3836062_3836154	22.7601	-1.04583	0.391653	-2.6703	0.00757831	0.0342099	15	17	24	17	26	22	13	8	15	42	39	42
EA674_04010|diacylglycerol_kinase	11.0956	-1.37483	0.515185	-2.66862	0.00761647	0.0343526	7	13	8	9	2	6	6	12	2	22	26	29
EA674_02180|50S_ribosomal_protein_L17	5621.71	0.197898	0.0742917	2.6638	0.00772642	0.0348187	7979	5972	5794	7478	3865	6091	4584	4024	5864	6446	5658	5712
EA674_18370|F0F1_ATP_synthase_subunit_B	4577.98	0.224144	0.0842401	2.66078	0.00779604	0.0350898	6141	5075	4744	6084	3309	4808	3880	3256	4814	5306	4452	4442
CP039993_3396235_3396334	21.0783	-1.02636	0.385763	-2.66061	0.00779995	0.0350898	23	24	7	20	15	10	14	10	31	30	44	39
EA674_01170|DNA/RNA_non-specific_endonuclease	26.6021	0.909355	0.342184	2.6575	0.00787217	0.035376	32	43	30	41	19	33	22	20	26	21	13	25
EA674_02805|hypothetical_protein	86.7408	0.490612	0.184639	2.65714	0.00788074	0.035376	136	106	88	102	66	77	73	68	103	83	76	84
EA674_03450|protein_deglycase_HchA	67.6051	-0.574232	0.21612	-2.65701	0.0078838	0.035376	94	62	50	84	48	48	44	43	65	118	84	113
EA674_10945|helix-turn-helix_transcriptional_regulator	86.6799	0.52907	0.199149	2.65666	0.007892	0.0353826	138	100	100	124	64	102	64	60	79	69	64	111
EA674_08750|hypothetical_protein	90.1736	-0.484395	0.182404	-2.65561	0.00791655	0.0354624	91	96	78	111	50	81	82	55	95	127	124	137
EA674_10065|TonB-dependent_siderophore_receptor	130.451	0.40758	0.153567	2.65409	0.00795236	0.0355924	210	139	132	161	93	135	116	99	145	119	124	131
EA674_05965|hypothetical_protein	11.5213	-1.27328	0.480198	-2.65156	0.00801202	0.0358289	9	12	9	10	5	9	8	1	11	25	29	22
EA674_16305|Bax_inhibitor-1/YccA_family_protein	268.267	-0.327163	0.123549	-2.64805	0.00809586	0.036173	415	263	247	323	137	229	179	161	271	412	388	391
EA674_03650|serine--tRNA_ligase	737.265	0.210917	0.0796718	2.64732	0.0081132	0.0362196	1053	785	773	978	500	743	636	515	793	741	764	837
EA674_11575|malonate_decarboxylase_subunit_alpha	16.1804	-1.18435	0.44759	-2.64606	0.00814343	0.0363237	18	15	11	24	5	11	11	1	16	44	30	29
EA674_02045|30S_ribosomal_protein_S10	15489.9	0.230735	0.0873475	2.64157	0.0082522	0.0367776	20540	16504	17533	19537	11046	16142	13273	10865	16367	18014	15136	15399
CP039993_675263_675362	214.367	0.373435	0.141522	2.63871	0.00832219	0.0370581	256	262	208	316	153	212	184	190	244	211	176	199
CP039993_3866512_3866742	210.954	-0.42058	0.159497	-2.63692	0.00836622	0.0372226	314	181	206	219	110	198	142	148	184	398	256	309
CP039994_24160_24215	2.16812	4.13304	1.56773	2.63632	0.00838107	0.0372344	2	3	4	1	2	0	6	3	2	0	0	0
EA674_10850|3-deoxy-manno-octulosonate_cytidylyltransferase	160.748	0.378292	0.143497	2.63624	0.00838306	0.0372344	232	185	183	230	106	147	133	106	192	145	158	178
CP039993_644888_645099	26.9021	-0.963881	0.365826	-2.6348	0.00841858	0.0373606	24	21	17	45	13	15	19	32	23	42	52	31
CP039993_3087339_3087529	332.196	-0.294026	0.111698	-2.63232	0.00848038	0.0376031	361	335	305	425	226	348	244	237	352	444	412	426
EA674_15875|carbon-nitrogen_hydrolase_family_protein	255.296	0.32155	0.122404	2.62696	0.00861524	0.0381688	389	294	237	353	180	297	215	175	260	267	241	251
EA674_04350|class_1_fructose-bisphosphatase	688.187	0.213431	0.0812824	2.62579	0.00864474	0.0382672	931	749	698	883	511	687	624	462	781	710	685	737
EA674_06915|ABC_transporter_permease	699.308	0.222831	0.0848963	2.62474	0.00867153	0.0383534	957	806	743	889	494	664	611	460	770	772	721	742
EA674_06990|alanine_racemase	112.615	0.436968	0.166503	2.62439	0.00868042	0.0383604	152	122	127	143	80	126	112	72	136	93	104	112
EA674_13315|LysM_peptidoglycan-binding_domain-containing_protein	3533.37	-0.177785	0.06777	-2.62336	0.00870682	0.0384447	4818	3452	3593	4474	2136	3449	2628	2315	3497	4758	4409	4747
EA674_10770|integration_host_factor_subunit_beta	468.98	-0.25602	0.097672	-2.62122	0.00876168	0.0386545	639	442	432	628	293	495	321	331	432	566	661	640
EA674_00130|methionyl-tRNA_formyltransferase	132.188	0.428863	0.163754	2.61895	0.00882004	0.0388793	174	159	128	170	90	141	119	107	169	137	104	115
EA674_01660|lipase_secretion_chaperone	17.9895	-1.03896	0.396778	-2.61849	0.00883195	0.0388991	24	15	7	18	10	17	10	17	13	34	30	32
EA674_03695|DUF493_domain-containing_protein	349.34	0.290484	0.111043	2.61594	0.00889809	0.0391576	528	401	351	459	203	398	291	238	398	329	355	400
CP039993_243819_244134	8.2336	1.7	0.650925	2.61167	0.00901006	0.0396171	17	13	8	11	10	7	5	9	6	2	6	4
EA674_11375|serine_O-acetyltransferase	182.731	0.385805	0.147779	2.61069	0.00903587	0.0396974	236	240	202	268	120	174	143	129	205	204	162	177
EA674_14195|aldehyde_dehydrogenase	5.68492	2.13392	0.818749	2.60632	0.00915203	0.0401741	19	9	3	7	2	9	3	9	3	3	1	3
EA674_14180|MHS_family_MFS_transporter	44.6061	-0.632703	0.242958	-2.60417	0.00920967	0.0403933	54	44	40	56	26	37	22	25	43	76	75	71
EA674_03375|rod_shape-determining_protein_MreD	178.803	0.390602	0.15009	2.60244	0.00925622	0.0405636	240	234	198	255	137	151	142	120	191	192	180	163
EA674_01550|prepilin-type_N-terminal_cleavage/methylation_domain-containing_protein	66.9715	-0.570228	0.219288	-2.60037	0.00931237	0.0407297	62	79	52	78	47	53	55	46	58	101	86	114
CP039993_2623436_2623552	77.4678	-0.54156	0.208271	-2.60026	0.00931527	0.0407297	111	60	70	93	28	99	53	50	66	117	130	113
EA674_15890|organic_hydroperoxide_resistance_protein	59.1154	-0.594158	0.228506	-2.60018	0.00931741	0.0407297	78	42	51	66	42	45	60	26	64	99	90	76
EA674_01520|glutamate_synthase_large_subunit	2464.36	0.17912	0.068903	2.5996	0.00933327	0.0407651	3312	2541	2649	3141	1773	2495	2105	1664	2854	2541	2611	2669
EA674_03030|quaternary_ammonium_transporter	10.5675	-1.54729	0.595491	-2.59834	0.00936766	0.0408813	16	3	3	10	5	6	4	8	18	31	16	16
EA674_17780|D-alanyl-D-alanine_endopeptidase_PBP7/8	1356.01	-0.228549	0.087971	-2.598	0.00937692	0.0408877	1963	1293	1220	1887	684	1469	839	1074	1294	1728	1762	1903
EA674_04420|NGG1p_interacting_factor_NIF3	54.1153	-0.640771	0.246899	-2.59528	0.00945147	0.0411786	78	51	50	63	21	40	21	33	57	74	113	101
EA674_18415|Dyp-type_peroxidase	266.064	-0.330152	0.127227	-2.59498	0.00945952	0.0411795	343	255	237	372	176	242	215	161	249	346	310	434
EA674_00525|AcfC_family_putative_adhesin	23.602	-0.839969	0.324081	-2.59185	0.00954625	0.0415226	24	30	22	24	9	18	9	14	13	39	51	53
EA674_15910|DUF2339_domain-containing_protein	69.208	-0.544808	0.210255	-2.59117	0.00956489	0.0415693	70	67	62	97	42	61	55	48	60	79	114	111
EA674_06135|Nif3-like_dinuclear_metal_center_hexameric_protein	100.664	0.488868	0.188761	2.58988	0.00960104	0.0416919	171	108	112	173	65	105	92	63	83	98	95	94
CP039993_3674035_3674247	407.09	-0.272858	0.105487	-2.58664	0.00969166	0.0420506	557	382	340	529	224	434	314	335	378	526	501	565
CP039993_3412089_3412851	224.726	-0.41146	0.159183	-2.58483	0.00974279	0.0422375	278	203	181	275	95	249	144	229	241	280	306	324
EA674_01425|DUF4179_domain-containing_protein	377.506	-0.253432	0.0981018	-2.58336	0.00978427	0.0423766	512	366	356	465	223	368	287	260	369	508	498	516
CP039993_1441719_1441875	71.9302	-0.604195	0.233901	-2.58312	0.00979101	0.0423766	85	60	59	79	40	82	53	57	63	65	112	146
CP039993_3524430_3524616	284.885	0.305513	0.118351	2.58141	0.00983976	0.0425435	407	292	288	380	200	284	253	227	336	234	293	301
EA674_11380|hypothetical_protein	779.494	-0.268647	0.104099	-2.58068	0.0098606	0.0425435	877	769	829	958	519	714	679	460	752	1109	963	1059
EA674_00125|16S_rRNA_(cytosine(967)-C(5))-methyltransferase_RsmB	160.591	0.370102	0.143414	2.58066	0.00986103	0.0425435	227	201	155	212	126	150	149	109	172	161	152	155
CP039993_3968511_3968563	4.3855	-2.41132	0.934392	-2.58063	0.00986199	0.0425435	3	1	1	6	5	5	0	3	4	7	13	7
EA674_10070|MFS_transporter	27.4002	-0.830963	0.322073	-2.58004	0.00987876	0.0425809	35	13	27	30	15	24	21	17	27	39	44	55
EA674_12360|type_VI_secretion_system-associated_protein_TagF	14.6755	-1.14292	0.443068	-2.57956	0.00989259	0.0426055	17	15	6	15	3	14	13	8	13	35	22	29
EA674_17465|serine_hydrolase_family_protein	56.6793	-0.627562	0.243433	-2.57797	0.0099384	0.0427677	77	39	54	61	30	49	39	48	45	83	70	119
EA674_05880|terminase	16.7579	-1.07893	0.418679	-2.57698	0.00996678	0.0428547	23	10	12	14	7	22	10	11	9	23	43	31
EA674_03020|nitrite/sulfite_reductase	463.293	0.267388	0.103881	2.57399	0.0100534	0.0431916	704	498	458	617	309	527	339	332	543	451	491	481
EA674_07395|helicase	206.615	0.333915	0.129871	2.57113	0.0101366	0.0435136	282	228	221	310	138	205	182	152	227	213	194	196
EA674_08565|phosphoenolpyruvate--protein_phosphotransferase	538.128	0.247666	0.0963975	2.56922	0.0101928	0.0437193	780	578	540	768	318	604	427	407	608	573	542	538
EA674_06020|hypothetical_protein	39.7187	0.725533	0.282514	2.56813	0.0102249	0.0438208	52	46	42	79	20	49	29	40	45	35	30	23
EA674_15360|NADH-quinone_oxidoreductase_subunit_NuoE	1804.01	0.199292	0.0777136	2.56444	0.0103344	0.044254	2557	1922	1871	2422	1208	2011	1453	1270	1889	2039	1849	1840
CP039993_820803_820905	33.6353	0.811687	0.31694	2.56101	0.0104367	0.0446559	41	61	27	51	24	35	29	26	40	27	22	28
EA674_03770|2-oxoglutarate_dehydrogenase_complex_dihydrolipoyllysine-residue_succinyltransferase	4347.59	0.212593	0.0830784	2.55894	0.010499	0.0448859	5929	4570	4573	5914	3209	4671	3718	2941	4519	4939	4247	4319
EA674_17160|MerR_family_transcriptional_regulator	65.0579	-0.542297	0.212154	-2.55614	0.0105839	0.045212	104	63	59	63	29	54	26	51	48	102	118	118
EA674_19565|hypothetical_protein	2.431	3.897	1.52669	2.55258	0.0106929	0.0456402	3	5	0	5	4	3	2	2	4	0	0	0
EA674_18280|hypothetical_protein	91.6993	0.510565	0.200057	2.55209	0.0107078	0.045667	99	107	88	133	74	97	91	90	101	71	80	65
EA674_02080|30S_ribosomal_protein_S3	18537.4	0.203404	0.0797198	2.55148	0.0107266	0.0456924	26001	19440	20313	25093	11991	20384	14725	13434	18889	21728	18855	18692
EA674_02090|50S_ribosomal_protein_L29	12829.7	0.211492	0.0828947	2.55133	0.0107312	0.0456924	16424	12976	14310	17157	8354	14551	10245	10889	13073	13446	12868	13171
EA674_03750|succinate_dehydrogenase_iron-sulfur_subunit	2665.12	0.179656	0.0704265	2.55097	0.0107424	0.0457031	3766	2933	2619	3609	1869	2852	2199	1892	2692	2882	2873	2756
CP039993_3450808_3450975	3391.71	0.248865	0.0976154	2.54945	0.0107894	0.0458661	4679	3858	3677	4268	2538	3391	2802	2352	3464	4159	3194	3335
EA674_06455|DUF1315_family_protein	243.206	0.349513	0.137141	2.54857	0.0108166	0.0459443	350	268	234	354	138	263	238	196	268	185	252	256
EA674_17455|peptide_signal_protein	20.9135	-1.03616	0.406646	-2.54807	0.0108322	0.0459732	36	11	12	21	9	23	13	16	8	25	39	58
EA674_12580|HAD-IIIA_family_hydrolase	5.1043	-2.0499	0.804725	-2.54733	0.0108552	0.0460336	4	4	0	4	2	9	3	3	3	7	11	16
EA674_11565|malonate_decarboxylase_subunit_delta	10.7026	-1.36021	0.5343	-2.54578	0.0109033	0.0462004	9	10	6	5	3	4	7	9	16	23	17	27
EA674_06015|hypothetical_protein	16.7264	1.12758	0.443294	2.54363	0.0109708	0.0464488	27	21	27	26	6	16	12	11	28	7	17	12
EA674_08735|threonine_ammonia-lyase,_biosynthetic	427.022	0.272939	0.107495	2.53908	0.0111145	0.0470196	671	459	456	580	254	425	314	346	451	483	436	435
EA674_10950|serine/threonine_transporter_SstT	383.76	0.261995	0.103244	2.53764	0.0111603	0.0471751	500	424	400	545	285	390	323	275	424	396	355	400
EA674_15480|hypothetical_protein	21.4709	-1.03558	0.408224	-2.5368	0.0111871	0.0472504	12	23	15	19	12	30	17	14	16	21	49	39
EA674_08340|hypothetical_protein	15.6788	-1.08859	0.429181	-2.53644	0.0111986	0.0472608	9	14	15	9	14	11	16	7	11	26	29	31
CP039993_3224631_3224683	13.643	-1.17503	0.463448	-2.53542	0.0112314	0.0473083	16	11	8	12	4	18	5	6	17	32	24	25
EA674_17865|P-II_family_nitrogen_regulator	547.339	0.234479	0.0924865	2.53528	0.0112357	0.0473083	867	571	561	842	310	654	357	468	464	552	582	618
EA674_07605|TetR_family_transcriptional_regulator	38.7131	0.727471	0.286943	2.53525	0.0112368	0.0473083	60	39	69	59	25	34	29	24	36	32	32	43
EA674_19420|hypothetical_protein	1.32244	4.32198	1.7063	2.53295	0.0113106	NA	1	5	4	2	0	2	0	2	0	0	0	0
CP039993_3404020_3404337	42.7339	-0.719116	0.283928	-2.53274	0.0113176	0.0476045	57	39	30	53	21	22	41	21	48	87	49	77
EA674_10345|hypothetical_protein	204.831	0.329537	0.130123	2.5325	0.0113253	0.0476045	296	240	214	286	134	194	186	141	224	180	223	217
EA674_05045|hypothetical_protein	36.9833	-0.798371	0.315474	-2.53071	0.0113833	0.0478101	62	21	18	40	26	33	36	23	31	57	46	73
EA674_06855|paraquat-inducible_protein_A	22.7741	-1.0682	0.422252	-2.52977	0.0114136	0.0478988	17	26	13	32	1	19	22	18	21	27	44	53
EA674_14495|peptide_ABC_transporter_ATP-binding_protein	12.634	-1.1681	0.46205	-2.52808	0.0114687	0.0480747	14	10	8	18	4	9	12	5	10	23	29	22
EA674_16050|RNase_adapter_RapZ	293.62	0.291532	0.115325	2.52793	0.0114738	0.0480747	422	335	289	399	197	322	237	224	316	258	277	353
EA674_11255|methionine_transporter	2.87733	3.65953	1.44793	2.52742	0.0114902	0.0481051	5	3	5	2	6	4	2	2	2	0	1	0
EA674_01590|guanylate_kinase	429.774	0.272828	0.107974	2.52678	0.0115114	0.048125	649	486	416	565	258	433	377	356	446	426	401	501
EA674_18400|metal_ABC_transporter_ATP-binding_protein	136.625	0.38963	0.154204	2.52672	0.0115133	0.048125	217	157	140	196	104	122	107	93	151	142	130	133
EA674_04315|DnaA_regulatory_inactivator_Hda	94.6774	-0.442676	0.175296	-2.52531	0.0115596	0.04828	107	99	88	110	46	92	77	62	92	144	127	146
EA674_04555|ribonuclease_III	194.281	0.352738	0.139744	2.52418	0.011597	0.0483895	280	210	216	264	126	199	186	130	213	220	164	190
EA674_07980|hypothetical_protein	14.9953	-1.13051	0.447913	-2.52396	0.0116043	0.0483895	25	7	14	17	1	12	5	6	13	42	30	30
CP039993_3634755_3634815	132.989	0.433996	0.172057	2.5224	0.0116558	0.0485659	182	175	138	137	105	151	110	92	151	100	135	148
EA674_18360|F0F1_ATP_synthase_subunit_alpha	15470	0.197861	0.0784873	2.52093	0.0117044	0.0487297	20097	17295	16211	20676	10998	16320	12728	11567	15602	17526	15591	15619
EA674_16465|type_IV_pilus_biogenesis/stability_protein_PilW	454.535	0.243192	0.0965442	2.51897	0.01177	0.0489408	687	516	448	652	291	530	330	321	452	457	464	522
EA674_16090|bifunctional_(p)ppGpp_synthetase/guanosine-3',5'-bis(diphosphate)_3'-pyrophosphohydrolase	1275.61	-0.189571	0.0752609	-2.51885	0.0117738	0.0489408	1636	1324	1215	1674	779	1248	960	856	1311	1513	1728	1709
EA674_03790|tryptophan--tRNA_ligase	548.945	0.236426	0.0939342	2.51693	0.0118383	0.0491703	798	568	603	739	371	526	443	397	614	585	575	573
EA674_12415|hypothetical_protein	38.1253	-0.773598	0.307623	-2.51476	0.0119113	0.0494343	28	31	43	26	28	22	31	32	38	53	62	71
EA674_04365|Tol-Pal_system_beta_propeller_repeat_protein_TolB	710.941	-0.211274	0.0841513	-2.51065	0.012051	0.0499747	928	714	680	874	441	719	519	498	713	956	851	984
CP039993_189003_189297	76.8062	-0.554996	0.221169	-2.50937	0.0120946	0.0501158	137	55	59	104	34	70	41	66	48	132	114	126
CP039993_1524160_1524291	4.04556	2.73368	1.08981	2.50839	0.0121284	0.050216	12	5	3	7	5	5	3	4	2	0	2	1
CP039993_3343431_3343500	52.8557	0.684795	0.273169	2.50685	0.0121811	0.0503946	74	67	47	75	58	51	39	53	45	39	46	36
EA674_19010|5'-methylthioadenosine/S-adenosylhomocysteine_nucleosidase	43.9223	0.644289	0.257091	2.50608	0.0122079	0.0504657	85	52	47	69	28	58	30	27	37	35	39	47
EA674_05320|D-alanyl-D-alanine_carboxypeptidase_PBP5/6	1223.81	0.182098	0.0727064	2.50457	0.0122602	0.0506419	1714	1329	1308	1538	811	1251	1055	818	1335	1333	1263	1392
EA674_04225|ChbG/HpnK_family_deacetylase	5.52015	-1.90422	0.760386	-2.50428	0.01227	0.0506428	5	5	0	9	3	4	5	2	1	12	14	12
CP039993_933869_934178	292.444	0.31571	0.126084	2.50396	0.0122811	0.0506488	380	343	348	357	184	281	241	198	376	307	270	326
CP039993_873715_873793	23.6567	-0.823164	0.32894	-2.50247	0.012333	0.0508227	30	21	21	28	9	23	9	12	23	38	47	47
EA674_11570|triphosphoribosyl-dephospho-CoA_synthase	12.3046	-1.30309	0.52296	-2.49176	0.0127113	0.0523408	5	9	13	8	8	6	9	9	13	34	24	13
CP039993_3586974_3587075	167.531	0.364254	0.14628	2.49012	0.01277	0.0525411	225	227	168	216	102	200	139	125	165	160	157	186
EA674_06835|DMT_family_transporter	4.67362	-2.21914	0.891959	-2.48794	0.0128485	0.052779	0	6	1	3	2	3	7	1	1	11	15	9
EA674_06275|NADPH-dependent_7-cyano-7-deazaguanine_reductase_QueF	246.629	0.297999	0.119782	2.48784	0.0128522	0.052779	345	274	263	344	183	264	191	187	240	255	229	262
CP039993_283320_283375	17.5542	1.16643	0.468881	2.48768	0.012858	0.052779	33	23	24	32	10	13	19	20	4	15	7	15
EA674_15950|transcription_termination_factor_Rho	2366.95	0.237333	0.095579	2.48311	0.0130241	0.0534191	2742	2865	2582	2788	1875	2236	2335	1462	2645	2402	2360	2571
EA674_17350|23S_rRNA_(guanosine(2251)-2'-O)-methyltransferase_RlmB	339.735	0.294987	0.118834	2.48235	0.0130519	0.0534609	461	401	332	429	288	356	290	208	387	369	303	339
EA674_05605|siderophore_ABC_transporter_substrate-binding_protein	5.26398	1.99176	0.802478	2.48201	0.0130643	0.0534609	12	6	9	4	2	5	6	5	8	3	2	2
EA674_04540|elongation_factor_4	1472.53	0.216501	0.0872287	2.482	0.0130648	0.0534609	1947	1605	1605	1914	1063	1514	1339	917	1606	1613	1555	1458
EA674_01540|TPM_domain-containing_protein	111.302	-0.44326	0.178797	-2.47912	0.0131705	0.0538514	143	132	96	136	38	126	76	62	96	159	164	202
CP039994_6246_6464	2.35017	3.96009	1.59765	2.4787	0.0131862	0.0538735	2	2	4	7	0	6	6	0	2	0	0	0
EA674_15800|histidinol-phosphate_transaminase	192.436	0.362678	0.146412	2.4771	0.0132453	0.0540729	295	220	235	278	107	181	171	111	206	225	186	195
EA674_13405|hypothetical_protein	547.651	-0.258267	0.104337	-2.47531	0.0133121	0.0543036	684	526	503	833	272	599	444	393	503	626	739	764
EA674_05080|NAD(P)/FAD-dependent_oxidoreductase	111.26	-0.431365	0.174301	-2.47483	0.01333	0.0543343	129	96	106	130	69	107	107	66	110	180	132	152
EA674_06405|MgtC/SapB_family_protein	24.4595	-0.810922	0.327722	-2.47442	0.0133454	0.0543547	22	26	20	33	15	19	12	18	19	40	42	43
CP039993_631316_631494	5.72743	1.79657	0.72623	2.47383	0.0133672	0.0543911	11	10	12	5	3	1	6	4	8	2	5	3
EA674_15995|50S_ribosomal_protein_L20	5977.24	0.215957	0.087304	2.47362	0.013375	0.0543911	8433	6800	6472	7454	4296	5954	4915	3900	6221	7302	6153	5942
EA674_08665|cytochrome_bd_biosynthesis_protein	340.276	-0.273291	0.110525	-2.47267	0.0134109	0.0544949	444	308	327	481	192	371	216	247	341	459	451	440
EA674_17930|SulP_family_inorganic_anion_transporter	130.628	0.42705	0.172807	2.47126	0.0134639	0.0546679	148	156	143	180	105	126	136	101	133	127	113	109
CP039993_696349_696503	39.3118	0.683358	0.276912	2.46778	0.0135955	0.0551594	49	52	57	46	22	47	32	28	46	30	36	38
CP039993_3696856_3696975	100.076	0.446055	0.180779	2.46741	0.0136095	0.0551739	133	126	103	116	83	116	90	71	101	95	88	94
EA674_15260|HlyD_family_secretion_protein	40.0393	-0.657636	0.266569	-2.46704	0.0136235	0.0551877	55	30	28	49	24	31	37	28	38	56	54	73
EA674_08535|EAL_domain-containing_protein	180.9	-0.342634	0.138986	-2.46523	0.0136924	0.055388	274	157	171	228	93	170	112	135	167	253	257	275
EA674_18895|murein_biosynthesis_integral_membrane_protein_MurJ	142.392	0.365481	0.148257	2.46519	0.013694	0.055388	243	154	167	199	81	159	104	98	130	140	161	151
CP039993_3046919_3047097	7557.47	0.208453	0.0846466	2.46263	0.0137924	0.0557429	10144	8434	8330	9574	5152	7672	6464	5204	7949	9066	7557	7653
CP039993_735492_735601	2.38812	-3.45813	1.406	-2.45955	0.0139111	0.0561796	1	1	0	0	2	2	0	0	3	3	4	16
EA674_13010|aspartate_carbamoyltransferase	298.365	0.319436	0.12995	2.45815	0.0139655	0.0563559	471	313	315	419	205	307	232	189	354	342	299	265
EA674_10550|peptidylprolyl_isomerase	1123.49	0.1809	0.0736058	2.45769	0.0139834	0.0563846	1607	1217	1051	1472	782	1178	977	825	1215	1140	1168	1225
EA674_11035|OsmC_family_protein	39.6127	-0.658466	0.267977	-2.45718	0.0140034	0.0564221	45	26	33	49	34	26	38	23	45	56	51	63
CP039993_688675_688728	190.64	0.331795	0.135178	2.45451	0.0141077	0.0567988	252	219	206	238	139	190	152	157	216	187	183	191
EA674_06525|thiazole_synthase	277.016	0.312552	0.127449	2.45236	0.0141922	0.0570813	386	271	304	373	206	301	241	216	288	302	259	241
EA674_03350|Asp-tRNA(Asn)/Glu-tRNA(Gln)_amidotransferase_subunit_GatB	849.73	0.23995	0.0978521	2.45217	0.0141997	0.0570813	1234	909	925	1137	551	934	717	540	911	996	849	846
CP039993_3444718_3444818	322.322	0.363115	0.148305	2.44843	0.0143479	0.0576332	354	394	338	469	253	318	299	250	349	222	345	325
EA674_00450|thiamine-phosphate_kinase	272.777	0.34722	0.14192	2.4466	0.0144212	0.0578831	377	383	267	361	230	247	236	157	260	297	260	284
EA714_017145|DNA-directed_RNA_polymerase_subunit_beta	20529.5	0.157111	0.0642363	2.44583	0.0144519	0.0579554	28306	21863	20932	26618	14538	20710	18304	13611	22310	22806	21824	21489
EA674_17445|fatty_acid_oxidation_complex_subunit_alpha_FadB	3450.33	-0.211574	0.0865122	-2.4456	0.0144612	0.0579554	4929	3196	3368	4512	1864	3533	2550	2385	3361	4934	4330	4434
CP039993_324127_324196	213.239	0.365929	0.149714	2.44419	0.0145177	0.0581374	259	239	249	264	181	241	209	118	228	182	219	208
EA674_11365|DNA_polymerase_III_subunit_alpha	566.95	0.229143	0.0939045	2.44017	0.0146805	0.0587444	763	632	586	739	417	622	440	391	639	602	552	605
EA674_10425|histidine_phosphatase_family_protein	16.1472	1.12514	0.461694	2.43698	0.0148105	0.0592194	35	25	11	19	20	21	10	7	17	11	11	11
EA674_00795|TMEM165/GDT1_family_protein	45.6884	0.661594	0.27181	2.43403	0.0149316	0.0596583	64	64	44	56	40	50	36	33	55	51	25	37
EA674_13990|esterase	38.6714	-0.708921	0.291469	-2.43223	0.0150061	0.0599102	59	36	22	54	21	30	27	19	36	51	84	59
EA674_03705|hypothetical_protein	128.324	0.394292	0.162178	2.43123	0.0150477	0.0600308	196	136	129	199	94	160	102	91	119	101	123	139
EA674_07780|putative_phage_replication_protein	1.4753	-4.11321	1.69285	-2.42976	0.0151087	NA	0	0	0	3	1	0	2	2	0	1	6	3
CP039993_2213741_2213912	2.03127	-3.95782	1.6291	-2.42946	0.0151214	0.0602788	0	0	0	1	5	1	5	0	1	0	6	3
CP039993_1559774_1559962	28.3506	-0.771678	0.317707	-2.4289	0.0151447	0.0603261	31	25	23	24	22	25	18	20	24	36	59	45
CP039993_3634604_3634679	173.666	0.423114	0.174278	2.42781	0.0151904	0.0604623	226	221	194	266	139	164	162	87	183	190	172	137
EA674_04575|pyridoxine_5'-phosphate_synthase	229.367	0.373064	0.153862	2.42467	0.0153224	0.0609414	317	251	241	278	200	300	175	159	228	218	180	253
EA674_04715|single-stranded_DNA-binding_protein	2.53691	-2.84809	1.17477	-2.42439	0.0153341	0.0609418	2	0	1	2	1	2	0	3	0	8	6	8
EA674_17000|radical_SAM_family_heme_chaperone_HemW	89.2092	0.498405	0.205771	2.42214	0.0154295	0.0612746	101	132	114	102	72	88	71	62	83	90	87	83
EA674_15250|TetR/AcrR_family_transcriptional_regulator	31.0822	-0.713901	0.294812	-2.42155	0.0154546	0.0613279	44	23	25	40	11	34	13	27	27	51	47	57
EA674_16270|leucine--tRNA_ligase	1233.74	0.190045	0.0785187	2.42037	0.0155045	0.0614794	1691	1439	1223	1731	855	1307	939	835	1322	1310	1277	1380
EA674_04515|dTMP_kinase	50.435	0.583986	0.241572	2.41744	0.0156299	0.0619299	70	74	67	58	34	49	51	22	51	45	49	54
EA674_03565|valine--tRNA_ligase	1355.48	0.211962	0.0877346	2.41595	0.0156944	0.0621385	2080	1544	1324	1925	884	1377	1087	861	1440	1564	1398	1438
CP039993_165951_166201	58.362	-0.542135	0.224587	-2.41392	0.0157819	0.0624045	63	52	55	70	45	53	34	41	55	79	76	104
EA674_02295|YihY_family_inner_membrane_protein	55.1297	-0.580518	0.240548	-2.41332	0.0158081	0.0624045	78	40	49	84	27	42	30	41	57	74	87	96
CP039993_3649472_3649532	49.5911	-0.585077	0.242448	-2.41321	0.0158127	0.0624045	68	40	47	53	29	42	36	37	32	67	93	80
CP039993_60576_60681	24.484	-0.810149	0.335717	-2.41319	0.0158136	0.0624045	19	27	19	32	11	32	14	17	19	33	44	43
EA674_06485|prephenate_dehydratase	358.001	0.289304	0.119893	2.41302	0.015821	0.0624045	583	390	323	537	243	390	281	255	370	318	404	365
CP039993_3578782_3578997	674.071	0.322452	0.133707	2.41163	0.0158813	0.0625953	703	784	756	777	636	622	747	416	742	684	586	631
EA674_03710|YecA_family_protein	339.741	0.264807	0.10984	2.41083	0.0159161	0.0626855	463	399	337	476	263	322	293	228	364	335	356	346
CP039993_939300_939694	49.7187	-0.628869	0.260957	-2.40985	0.015959	0.0628071	71	44	42	56	22	39	29	45	34	55	85	111
EA674_09830|catalase	27.7196	-0.84067	0.348899	-2.4095	0.0159745	0.0628212	47	17	23	37	7	34	13	11	21	40	45	74
EA674_03185|response_regulator	52.2661	-0.554517	0.230225	-2.40859	0.0160145	0.0629312	67	47	40	77	24	53	33	44	44	66	73	95
EA674_03580|polyketide_cyclase	73.7285	-0.47767	0.198705	-2.40391	0.0162206	0.0636936	91	59	54	107	51	81	58	57	66	85	101	107
EA674_14335|transcriptional_regulator_BetI	1303.17	0.285944	0.119092	2.40104	0.0163487	0.0641484	1434	1438	1569	1572	1017	1250	1427	767	1491	1341	1262	1256
CP039993_2694270_2694571	20.0671	-0.899842	0.374853	-2.40052	0.0163716	0.0641905	31	14	13	30	7	17	12	10	19	42	28	40
EA674_02125|50S_ribosomal_protein_L6	15829.7	0.188066	0.0783769	2.39951	0.016417	0.0643204	20776	16110	17029	21470	10873	16802	13563	12076	16589	17748	15706	15837
EA674_04580|tRNA-(ms[2]io[6]A)-hydroxylase	121.825	0.371504	0.154967	2.39731	0.0165159	0.0646597	183	143	135	144	78	115	108	82	148	124	118	128
CP039993_1897793_1897945	10.5989	-1.31582	0.549182	-2.39597	0.0165763	0.0648478	10	9	3	6	5	14	6	10	13	23	16	17
EA674_07230|hypothetical_protein	57.5707	0.554614	0.231598	2.39472	0.0166328	0.0649778	80	87	67	77	41	61	54	29	50	51	55	61
EA674_16125|TIM_barrel_protein	124.456	-0.370949	0.154919	-2.39447	0.0166442	0.0649778	179	116	116	150	59	119	91	92	103	180	187	181
EA674_13090|type_I_glyceraldehyde-3-phosphate_dehydrogenase	59.7853	0.540866	0.225886	2.39442	0.0166467	0.0649778	95	62	76	96	38	65	45	36	68	57	59	50
EA674_05400|YbdD/YjiX_family_protein	90.3181	-0.509617	0.212974	-2.39286	0.0167176	0.0652063	149	83	68	118	54	57	47	65	79	162	122	150
EA674_15870|anti-anti-sigma_factor_GigB	666.613	0.205311	0.0858688	2.39099	0.0168032	0.0654913	943	753	640	911	430	749	566	468	702	694	698	706
EA674_06825|hypothetical_protein	27.6813	0.867576	0.362961	2.39027	0.0168359	0.06557	59	30	25	39	21	30	12	24	41	27	21	15
CP039993_348839_348953	8.24033	-1.60399	0.671337	-2.38925	0.0168829	0.0657042	12	4	2	7	10	3	2	7	2	17	23	14
EA674_07140|acyl-CoA_dehydrogenase	429.359	0.277571	0.116209	2.38854	0.0169153	0.0657817	626	453	405	685	235	545	302	337	508	399	442	422
EA674_17460|hypothetical_protein	6.69005	-1.72285	0.721538	-2.38775	0.0169519	0.0658752	8	4	1	5	0	6	9	3	8	8	21	14
EA674_01025|4-aminobutyrate--2-oxoglutarate_transaminase	3847.81	0.174863	0.0732528	2.38712	0.016981	0.0659395	4990	4046	4129	5328	2524	4186	3282	2937	3826	4181	3920	4071
EA674_18175|TIGR00730_family_Rossman_fold_protein	62.9187	-0.52336	0.219371	-2.38573	0.0170451	0.0661397	84	63	56	84	26	54	53	26	61	93	104	105
CP039993_2308619_2308893	10.2516	-1.42833	0.598927	-2.38482	0.0170877	0.0662557	5	14	2	6	7	5	10	9	8	19	28	12
CP039993_2723550_2723605	1.45521	4.08248	1.71431	2.38142	0.0172462	NA	3	5	1	2	1	0	4	1	0	0	0	0
CP039993_3880136_3880510	3.96373	2.61095	1.09687	2.38037	0.0172955	0.0670119	9	3	6	8	2	8	4	1	6	1	2	0
EA674_08995|IacB_protein	22.4766	-0.811286	0.341307	-2.37699	0.0174544	0.0675777	27	17	19	18	19	17	18	8	24	40	42	32
EA674_04240|HlyD_family_secretion_protein	38.3449	-0.651542	0.274294	-2.37534	0.017533	0.0678321	33	38	37	40	21	41	33	23	34	48	64	67
EA674_13935|LysR_family_transcriptional_regulator	327.248	0.255823	0.107759	2.37403	0.017595	0.0680219	490	372	344	455	222	331	252	220	338	372	324	350
EA674_17280|ribosome-binding_factor_A	1137.1	0.197135	0.0830496	2.37371	0.0176105	0.0680316	1660	1235	1171	1377	738	1179	988	779	1273	1306	1160	1203
EA674_17820|leucyl_aminopeptidase	470.796	-0.219387	0.0924859	-2.37212	0.0176865	0.068275	598	487	455	572	292	466	386	287	475	607	592	667
CP039993_2283899_2284157	76.1295	-0.58262	0.245734	-2.37093	0.0177432	0.0684436	102	60	80	103	42	74	41	21	86	142	110	123
EA674_10920|phosphoglycerate_kinase	767.068	0.206342	0.0870806	2.36955	0.0178098	0.0686502	1123	841	789	1011	515	849	613	526	778	879	777	813
EA674_08275|outer_membrane_protein_assembly_factor_BamA	2415.36	0.165154	0.069776	2.36692	0.0179368	0.0690889	3373	2527	2384	3283	1744	2389	2196	1703	2512	2394	2604	2657
CP039993_2735555_2735679	3.24336	-2.4202	1.02326	-2.36518	0.0180211	0.0693628	2	1	1	2	2	3	5	0	3	7	8	7
EA674_03895|DOMON-like_domain-containing_protein	216.829	0.319069	0.135059	2.36243	0.0181556	0.0698251	261	268	229	289	152	229	198	149	246	228	207	201
EA674_04920|type_II_toxin-antitoxin_system_HicB_family_antitoxin	129.347	0.371542	0.157288	2.36218	0.0181678	0.0698251	211	152	153	172	78	142	85	113	90	126	133	155
EA674_17500|DUF1311_domain-containing_protein	184.132	-0.33634	0.142436	-2.36134	0.0182089	0.0699317	219	190	171	233	123	161	137	128	171	203	281	280
EA674_10990|sodium/proline_symporter_PutP	619.425	0.227142	0.096257	2.35975	0.0182873	0.0701815	996	650	581	888	398	715	449	476	613	654	647	650
CP039993_86796_86847	81.9523	0.495805	0.210176	2.359	0.0183244	0.0702725	100	94	84	100	83	104	77	49	89	73	62	71
EA674_05185|RluA_family_pseudouridine_synthase	206.226	0.302965	0.128569	2.35644	0.0184513	0.0706578	289	244	198	263	151	230	180	152	210	190	208	217
CP039993_3909984_3910388	9.11675	1.39236	0.59088	2.35643	0.0184518	0.0706578	19	12	15	13	4	10	5	12	4	9	8	1
EA674_14795|30S_ribosomal_protein_S7	11444.6	0.168413	0.0716115	2.35176	0.0186849	0.0714982	15348	12566	11637	14826	8125	11742	9995	8121	11943	13085	11622	11866
CP039993_381349_381942	58.3464	0.565884	0.240708	2.35092	0.0187272	0.0716079	82	67	63	53	56	58	48	52	69	50	47	52
CP039993_2134640_2134743	4.25029	-2.2559	0.960087	-2.34968	0.0187893	0.0717933	2	1	2	6	2	5	0	7	3	11	2	12
CP039993_2635932_2635995	42.1808	0.617402	0.262958	2.34791	0.018879	0.0720835	83	59	42	46	24	49	37	20	48	40	42	41
EA674_17360|tetratricopeptide_repeat_protein	48.4923	-0.576259	0.245609	-2.34625	0.0189635	0.0723536	56	40	41	69	26	59	26	41	40	72	83	56
EA674_15545|flavin_reductase	72.7	0.471396	0.200984	2.34544	0.0190046	0.0724576	111	87	74	103	52	74	63	55	73	78	58	67
EA674_06130|superoxide_dismutase	3981.32	0.171676	0.0732855	2.34256	0.0191518	0.0729658	5257	4112	4229	5236	2780	4128	3576	2869	4192	4398	3920	4261
EA674_16105|cysteine_synthase_CysM	347.591	0.259751	0.111179	2.33634	0.0194733	0.0741371	498	355	368	477	223	320	323	272	389	342	341	375
EA674_10280|YbaB/EbfC_family_nucleoid-associated_protein	948.447	0.196554	0.0841865	2.33474	0.0195571	0.074402	1419	996	851	1296	648	1030	793	743	1006	916	995	1021
EA674_14490|DNA_adenine_methylase	88.8882	-0.483226	0.207129	-2.33297	0.0196497	0.0746918	112	102	56	126	61	72	73	51	77	107	150	132
EA674_04510|endolytic_transglycosylase_MltG	114.461	0.398873	0.170989	2.33274	0.0196617	0.0746918	160	143	136	143	73	109	107	91	96	120	105	123
EA674_13720|hypothetical_protein	161.664	-0.319806	0.137136	-2.33204	0.0196988	0.0747463	205	149	145	229	98	163	119	126	141	200	209	237
EA674_04355|hypothetical_protein	97.3538	-0.431206	0.184915	-2.33191	0.0197053	0.0747463	154	76	85	122	60	79	63	72	85	141	146	147
EA674_11850|hydroxymethylglutaryl-CoA_lyase	479.765	-0.244325	0.104786	-2.33166	0.0197188	0.0747463	686	455	454	587	272	470	400	281	484	680	637	629
EA674_07365|ethanolamine_ammonia-lyase_subunit_EutB	9.86971	-1.27385	0.546413	-2.3313	0.0197376	0.0747636	10	8	6	12	2	6	9	1	16	21	18	21
EA674_17345|DMT_family_transporter	66.6473	0.520143	0.223202	2.33036	0.019787	0.0748967	85	88	72	91	54	76	61	32	81	64	48	67
CP039993_46240_46354	43.4806	0.636578	0.273356	2.32875	0.0198721	0.0751647	58	56	51	59	39	42	23	41	47	37	38	36
CP039993_2996241_2996390	29.9442	-0.751487	0.322975	-2.32676	0.0199779	0.0755105	45	24	13	31	20	29	26	16	34	55	45	39
EA674_14940|tetratricopeptide_repeat_protein	111.293	-0.403018	0.173235	-2.32642	0.019996	0.0755244	148	109	92	161	59	87	75	84	115	140	163	174
CP039993_3694834_3695216	401.251	0.349119	0.150136	2.32535	0.0200533	0.0756864	468	517	392	415	412	378	347	288	458	319	392	427
EA674_13700|XRE_family_transcriptional_regulator	19.9067	-0.881849	0.379698	-2.3225	0.0202061	0.0762084	19	28	12	24	9	13	6	16	15	32	36	46
CP039993_2749137_2749195	15.2424	1.14387	0.49258	2.32219	0.0202227	0.0762161	28	29	8	22	10	21	16	4	23	10	12	8
EA674_16970|Rne/Rng_family_ribonuclease	2695.2	0.203136	0.0875005	2.32154	0.0202575	0.0762926	3486	3010	2879	3527	1868	2855	2426	1733	2934	3090	2726	2681
EA674_04860|Ig_domain-containing_protein	9.30772	-1.22144	0.526211	-2.32119	0.0202764	0.0762939	9	10	6	8	4	3	9	2	9	15	19	27
CP039993_2330827_2330929	5.41422	-1.61726	0.696795	-2.321	0.0202869	0.0762939	4	6	3	7	2	6	1	1	1	11	12	19
CP039993_3630841_3631146	1697.37	0.182641	0.0787003	2.32071	0.0203025	0.0762978	2410	1763	1788	2188	1206	1665	1503	1123	1866	1956	1654	1835
EA674_18450|pirin_family_protein	271.067	-0.268003	0.115677	-2.31683	0.0205131	0.0770343	328	256	267	361	163	289	189	183	289	334	350	384
EA674_13430|phosphoethanolamine--lipid_A_transferase	9.28767	-1.27658	0.551145	-2.31623	0.0205459	0.077102	10	7	10	9	1	1	7	5	4	29	22	17
EA674_06540|RNA_polymerase_sigma_factor_RpoH	1345.57	-0.170489	0.0736398	-2.31518	0.0206032	0.0772621	1798	1349	1277	1686	789	1351	1106	883	1421	1676	1678	1807
EA674_10675|ABC_transporter_permease	55.6029	-0.512442	0.221466	-2.31387	0.0206749	0.0774755	63	56	56	57	34	58	42	26	48	84	83	94
EA674_03735|succinate_dehydrogenase,_cytochrome_b556_subunit	1576.87	0.174306	0.0753698	2.31268	0.0207402	0.0776649	2205	1804	1604	2005	1144	1578	1279	1090	1603	1789	1597	1781
EA674_18405|metal_ABC_transporter_permease	122.68	0.384092	0.166132	2.31197	0.0207793	0.0777559	172	161	116	154	82	118	128	84	134	130	112	115
CP039993_254687_254865	5.67566	-1.75011	0.757347	-2.31084	0.0208417	0.0779338	6	2	2	7	3	7	0	5	7	16	7	11
EA674_18345|F0F1_ATP_synthase_subunit_epsilon	3763.23	0.18433	0.079802	2.30984	0.0208969	0.0780847	4859	4240	4108	5006	2573	3824	3046	2718	3894	4349	3862	3939
CP039993_1633752_1633804	4.73158	-2.03963	0.883654	-2.30818	0.0209893	0.0783739	1	4	1	6	5	8	4	0	4	8	10	8
EA674_04655|MFS_transporter	43.9181	-0.623886	0.270795	-2.3039	0.021228	0.0792089	62	39	33	60	23	48	26	20	43	50	68	95
EA674_17265|Na+/H+_antiporter_subunit_E	63.8446	0.489547	0.21268	2.3018	0.0213465	0.0795946	101	80	71	91	47	59	53	48	52	61	65	60
CP039993_867528_867643	1.53245	3.97247	1.72686	2.3004	0.0214255	NA	7	0	2	6	1	0	1	2	1	0	0	0
EA714_011420|stress-induced_protein	7156.35	-0.273622	0.118948	-2.30034	0.021429	0.0798455	7241	7230	7831	6851	5223	6800	7013	3528	7804	9719	9013	9885
CP039993_3617226_3617410	767.113	0.652036	0.283658	2.29867	0.0215238	0.0801418	1018	958	844	825	666	707	758	757	726	387	719	786
EA674_02785|aspartate--tRNA_ligase	2483.07	0.17073	0.0743836	2.29526	0.021718	0.0807892	3465	2846	2513	3284	1682	2503	2056	1670	2616	2905	2599	2627
EA674_01450|UDP-N-acetylmuramoyl-L-alanyl-D-glutamate--2,_6-diaminopimelate_ligase	423.54	0.24172	0.105321	2.29508	0.0217284	0.0807892	605	512	454	509	249	397	395	271	483	479	432	471
EA674_00905|response_regulator_transcription_factor	162.528	0.324774	0.141627	2.29316	0.0218386	0.0811414	250	197	159	233	104	176	117	112	180	150	165	186
EA674_00110|TIGR04219_family_outer_membrane_beta-barrel_protein	60.5426	0.507052	0.221261	2.29164	0.0219262	0.0814091	95	74	68	87	33	59	47	40	81	61	52	60
EA674_01895|hypothetical_protein	69.1787	-0.4669	0.204112	-2.28747	0.0221682	0.0821919	81	84	60	71	36	60	59	32	68	116	100	108
EA674_15100|trehalose-phosphatase	55.5493	-0.641354	0.280377	-2.28747	0.0221683	0.0821919	52	54	60	44	29	37	61	33	47	54	93	129
CP039993_929075_929285	90.1641	0.44908	0.196519	2.28517	0.0223028	0.0826321	121	97	96	115	76	87	97	69	91	71	97	71
EA674_06170|adenosylhomocysteinase	3509.49	0.142042	0.0622581	2.28151	0.0225182	0.0833696	5033	3771	3545	4713	2392	3470	2825	2403	3808	3907	3711	3970
EA674_04180|diaminopimelate_epimerase	254.344	0.31487	0.138025	2.28125	0.0225336	0.0833696	420	273	281	349	181	270	178	155	263	297	277	231
EA674_01635|30S_ribosomal_protein_S16	3079.61	0.222838	0.0976959	2.28093	0.0225524	0.0833802	4076	3491	3352	3678	2366	2968	2919	1882	3284	3730	3008	3016
EA674_12375|type_VI_secretion_system_baseplate_subunit_TssG	14.8927	-0.996524	0.43738	-2.27839	0.0227032	0.0838788	21	15	15	9	0	9	4	7	14	45	30	30
EA674_02150|preprotein_translocase_subunit_SecY	26432.4	0.173737	0.0764262	2.27326	0.0230104	0.084954	34902	27104	28508	35711	18224	29099	21869	19605	26947	29838	26738	27004
CP039993_599314_599611	163.425	-0.334297	0.147138	-2.272	0.0230867	0.0851757	214	138	159	174	115	172	115	113	164	203	221	244
EA674_11005|GrpB_family_protein	4.19121	-2.07426	0.91315	-2.27154	0.0231143	0.0852176	2	1	2	5	3	6	3	3	5	8	4	10
EA674_13245|M48_family_metallopeptidase	7.60587	-1.45782	0.641968	-2.27087	0.0231551	0.0853083	8	2	7	11	5	4	0	8	4	17	19	12
EA674_09335|hypothetical_protein	7.19434	-1.62801	0.717384	-2.26936	0.0232462	0.0855838	4	2	9	11	4	10	0	0	6	14	13	23
EA674_04915|type_II_toxin-antitoxin_system_HicA_family_toxin	98.6098	0.389899	0.171998	2.26688	0.0233975	0.0860231	157	120	121	156	57	96	66	75	74	100	100	116
CP039993_58311_58482	69.1819	-0.508049	0.22412	-2.26687	0.0233983	0.0860231	75	75	59	59	39	67	51	52	73	84	127	99
EA674_16070|polynucleotide_adenylyltransferase_PcnB	420.423	0.242041	0.106788	2.26656	0.0234173	0.0860328	559	454	465	558	284	426	328	329	470	403	473	427
EA674_16535|bifunctional_4-hydroxy-2-oxoglutarate_aldolase/2-dehydro-3-deoxy-phosphogluconate_aldolase	299.807	-0.269695	0.119081	-2.2648	0.0235251	0.0863683	426	299	248	373	174	314	224	187	322	413	406	386
EA674_15355|NADH-quinone_oxidoreductase_subunit_NuoF	3761.04	0.163548	0.0722652	2.26317	0.0236251	0.086675	5191	3852	3909	5106	2439	4156	3176	2751	3923	4222	3863	3906
EA674_09325|filamentous_hemagglutinin_N-terminal_domain-containing_protein	93.3119	-0.417712	0.185242	-2.25495	0.0241367	0.0884899	98	106	90	113	51	74	72	57	99	151	117	144
EA674_13110|ribonuclease_HII	149.087	0.365124	0.162092	2.25257	0.0242861	0.0889757	208	184	165	183	99	159	137	97	156	108	172	172
EA674_11810|TMF_family_protein	76.3793	-0.490981	0.218148	-2.25068	0.0244061	0.0893267	89	63	76	90	48	72	35	70	75	106	127	100
CP039993_1907628_1907863	34.2146	-0.657545	0.292175	-2.25052	0.024416	0.0893267	56	23	27	52	16	30	16	27	24	48	65	57
EA674_13660|hypothetical_protein	12.0772	-1.16354	0.517195	-2.24972	0.0244667	0.0894501	12	12	7	14	3	13	11	5	8	13	17	43
CP039993_545438_545525	74.7205	0.469745	0.208866	2.24902	0.0245111	0.0894709	107	89	88	119	53	63	71	55	62	69	67	78
EA674_17675|argininosuccinate_lyase	666.086	0.194912	0.0866654	2.24902	0.0245114	0.0894709	892	769	681	857	468	657	559	496	691	693	719	718
EA674_02625|hypothetical_protein	161.691	0.327124	0.145464	2.24883	0.0245235	0.0894709	219	191	189	206	116	159	157	95	161	171	154	174
EA674_06925|NLPA_lipoprotein	1055.01	0.185033	0.0823435	2.24709	0.0246342	0.0897978	1511	1036	1063	1612	717	1081	847	813	1100	1074	1073	1137
EA674_07490|hypothetical_protein	31.1788	-0.678728	0.302075	-2.24689	0.0246474	0.0897978	27	27	38	23	17	25	27	17	32	46	55	55
EA674_14310|hypothetical_protein	220.447	0.340851	0.151797	2.24544	0.0247397	0.0900719	249	213	244	241	183	215	268	164	273	162	194	231
CP039993_2843236_2843405	1.49836	-3.62848	1.61652	-2.24463	0.0247919	NA	1	0	0	2	0	1	0	0	3	4	4	6
EA674_19495|hypothetical_protein	2.35592	3.51024	1.5644	2.24383	0.0248433	0.0903862	2	2	2	7	2	4	6	0	3	0	0	0
EA674_10230|tryptophan_synthase_subunit_beta	116.993	-0.382133	0.170422	-2.24228	0.0249433	0.0906873	168	104	96	150	58	111	105	68	127	171	161	160
EA674_03125|sel1_repeat_family_protein	145.469	-0.346634	0.154636	-2.24161	0.0249863	0.0907407	188	136	130	202	80	134	125	97	137	209	212	175
EA674_02155|50S_ribosomal_protein_L36	5952.38	0.166511	0.0742928	2.24128	0.0250083	0.0907407	7747	6225	6362	7837	4065	6364	4861	4624	6229	6548	6196	6146
CP039993_3407338_3407510	71.9836	-0.505089	0.22536	-2.24125	0.0250099	0.0907407	62	80	81	71	50	60	57	45	50	108	99	130
EA674_17680|oxidative_damage_protection_protein	154.643	0.341024	0.152254	2.23983	0.025102	0.0910121	231	193	131	207	127	161	130	108	160	154	145	153
CP039993_2579360_2579612	31.162	-0.695487	0.310792	-2.23779	0.025235	0.0913802	26	33	29	37	19	29	24	16	28	39	67	44
EA674_19230|membrane_protein_insertion_efficiency_factor_YidD	685.446	0.248641	0.111117	2.23766	0.0252432	0.0913802	847	817	688	872	631	582	670	393	773	700	698	671
EA674_15495|membrane-bound_PQQ-dependent_dehydrogenase,_glucose/quinate/shikimate_family	39.9066	-0.593791	0.265385	-2.23747	0.0252557	0.0913802	39	50	33	49	20	41	23	21	39	59	69	65
CP039993_1523559_1523641	110.745	0.807341	0.361449	2.23363	0.0255077	0.0922283	150	138	126	133	112	112	118	82	102	36	114	99
EA674_12335|type_VI_secretion_system_baseplate_subunit_TssK	16.7873	-0.913548	0.409232	-2.23235	0.0255918	0.0924687	22	10	12	31	7	23	3	12	14	25	28	32
EA674_03860|MGMT_family_protein	10.6327	-1.28571	0.576205	-2.23134	0.0256589	0.0926474	19	3	3	17	5	13	5	4	12	21	12	27
CP039993_976749_976842	23.9732	0.810614	0.363375	2.23079	0.0256947	0.0926516	30	38	30	37	22	20	23	16	16	20	16	23
EA674_07095|hypothetical_protein	40.5076	0.62487	0.280112	2.23079	0.0256954	0.0926516	71	35	43	63	24	48	33	31	56	29	39	31
EA674_08260|phosphatidate_cytidylyltransferase	478.868	0.259544	0.116391	2.22994	0.0257516	0.09279	581	583	539	573	374	449	415	326	518	545	433	518
EA674_17040|hypothetical_protein	108.315	0.430677	0.193157	2.22967	0.0257691	0.09279	127	99	120	147	82	116	111	82	156	115	72	81
EA714_009385|two-component_sensor_histidine_kinase_AdeS	4.94863	-1.69911	0.762445	-2.2285	0.0258473	0.0930078	6	2	2	7	3	7	2	2	1	12	7	14
CP039993_2726091_2726376	22.6394	-0.775236	0.348116	-2.22694	0.025951	0.0933171	18	22	29	23	14	18	13	9	16	36	40	50
CP039993_281702_282080	275.624	-0.327157	0.146968	-2.22604	0.0260114	0.0934702	399	265	219	384	122	300	163	204	313	336	377	424
CP039993_3967345_3967559	61.5519	0.536254	0.240949	2.22559	0.0260418	0.0935153	100	51	76	72	48	74	46	50	73	59	40	63
CP039993_408564_408690	13.7542	1.23897	0.557076	2.22405	0.0261451	0.093822	12	23	18	15	25	14	10	8	8	7	11	6
EA674_18355|F0F1_ATP_synthase_subunit_gamma	8429.69	0.175007	0.0787191	2.22318	0.0262037	0.0939682	10585	9291	8747	11401	5926	8954	7165	6406	8556	9492	8294	8706
CP039993_405077_405199	100.457	0.454441	0.204463	2.2226	0.0262425	0.0940431	140	124	86	104	98	100	103	84	97	83	99	82
CP039993_2774847_2774911	11.1534	-1.13174	0.509549	-2.22106	0.0263471	0.0943536	7	13	6	10	7	8	5	12	10	18	20	22
EA674_04385|tol-pal_system-associated_acyl-CoA_thioesterase	393.992	0.24751	0.111461	2.22059	0.0263787	0.0944023	504	457	418	552	284	371	347	302	386	418	395	400
EA674_16525|gluconokinase	422.052	-0.247985	0.111933	-2.21548	0.0267275	0.0955376	485	455	399	572	307	421	284	284	383	555	524	584
EA674_00050|hypothetical_protein	56.783	-0.499076	0.225275	-2.2154	0.0267323	0.0955376	73	49	65	72	19	65	29	36	47	88	80	108
CP039993_3657784_3657873	39.0213	0.605388	0.27342	2.21414	0.0268194	0.095752	70	64	39	46	20	31	34	26	42	32	34	52
EA674_01565|(2Fe-2S)-binding_protein	67.4661	0.515555	0.232861	2.214	0.0268288	0.095752	107	66	74	97	68	77	58	38	61	67	58	53
EA674_15165|tRNA-dihydrouridine_synthase_C	66.0281	0.505085	0.228237	2.21299	0.0268987	0.0959362	112	61	84	105	29	61	59	55	72	65	61	61
CP039993_2897972_2898508	110.83	-0.382777	0.173195	-2.21009	0.0270988	0.0965845	165	116	85	140	54	104	80	79	94	132	168	191
EA674_01220|antibiotic_biosynthesis_monooxygenase	13.8831	-0.995282	0.450682	-2.20839	0.0272172	0.0969404	17	9	7	20	6	10	11	13	15	25	22	20
EA674_09585|hypothetical_protein	0.988213	-4.2136	1.90838	-2.20795	0.0272477	NA	0	0	0	0	1	0	1	0	0	1	2	8
EA674_10640|nucleoside-diphosphate_sugar_epimerase	41.6391	-0.583073	0.26447	-2.20468	0.0274763	0.0977587	52	39	35	65	20	29	30	25	42	54	63	79
CP039993_2330309_2330437	14.0525	-0.979216	0.444175	-2.20457	0.0274842	0.0977587	17	11	8	16	6	7	11	12	17	20	24	29
CP039993_2645760_2646279	226.365	0.804493	0.365055	2.20376	0.0275412	0.0978671	195	340	302	209	250	202	288	115	238	109	217	195
CP039993_3053307_3053691	146.869	-0.326298	0.148074	-2.20361	0.0275519	0.0978671	177	123	111	190	101	142	133	112	188	167	181	184
EA674_07045|phosphoenolpyruvate_synthase	6695.8	0.162279	0.0736982	2.20193	0.0276699	0.0982198	10075	6669	6799	9148	4068	7324	5229	5174	7052	7433	7007	7227
CP039993_2703917_2704186	111.36	0.472246	0.214501	2.20161	0.0276931	0.0982358	157	149	118	153	84	120	118	38	125	131	88	99
CP039993_116173_116369	18.958	-0.950852	0.432054	-2.20077	0.0277523	0.0983792	18	11	15	32	7	12	19	15	22	30	15	44
EA674_18160|trimeric_intracellular_cation_channel_family_protein	80.9047	0.4308	0.195883	2.19928	0.0278583	0.0986883	153	87	85	107	46	72	66	56	96	76	86	85
EA674_06400|tRNA_(N6-threonylcarbamoyladenosine(37)-N6)-methyltransferase_TrmO	15.0992	-1.01076	0.459834	-2.19811	0.0279415	0.0988533	12	13	10	23	1	16	17	13	13	20	23	31
EA674_15205|LysE_family_translocator	221.266	-0.306209	0.139307	-2.19809	0.0279425	0.0988533	325	207	173	277	108	222	180	177	217	278	302	313
CP039993_1552829_1553768	7.80867	1.53808	0.699849	2.19774	0.0279679	0.0988766	11	6	11	6	11	3	11	7	12	5	4	1
EA674_04220|glycosyltransferase_family_2_protein	5.31114	-1.70715	0.776893	-2.19741	0.027991	0.0988913	6	2	3	7	2	10	3	1	0	8	9	20
CP039994_26353_26419	1.28875	3.82663	1.74246	2.19611	0.0280842	NA	5	3	0	4	1	1	0	1	2	0	0	0
CP039993_1077917_1078061	31.5256	0.671099	0.305953	2.19347	0.0282734	0.099822	47	37	37	36	15	41	29	29	36	28	25	26
EA674_04930|tape_measure_protein	20.6635	-0.780264	0.355841	-2.19273	0.0283267	0.0999255	23	23	14	25	7	18	13	14	21	29	40	38
EA674_14375|DUF1275_domain-containing_protein	5.57361	-1.66044	0.757316	-2.19254	0.0283408	0.0999255	5	2	2	6	2	5	3	8	7	8	12	9
CP039993_3746137_3746434	510.704	-0.213368	0.0973388	-2.19202	0.0283784	0.0999494	653	511	460	735	283	528	359	410	499	569	670	716
EA674_12600|3-hydroxyacyl-CoA_dehydrogenase	42.8149	-0.569589	0.259859	-2.19192	0.0283856	0.0999494	43	47	34	66	18	45	34	25	40	60	71	61
CP039994_4753_4888	1.50347	3.78024	1.72534	2.19101	0.028451	NA	1	4	2	2	5	0	1	0	1	0	0	0
EA674_07290|GNAT_family_N-acetyltransferase	122.48	-0.356147	0.162578	-2.19063	0.0284789	0.100211	143	129	105	160	88	103	87	93	111	175	153	174
EA674_08560|1-phosphofructokinase	186.997	0.301096	0.137541	2.18914	0.0285867	0.100523	267	217	168	263	149	207	163	126	192	185	181	181
EA674_02835|acyl-CoA_dehydrogenase	1032.17	-0.259984	0.118783	-2.18872	0.0286171	0.100562	1616	945	860	1503	473	1155	565	832	1004	1360	1404	1404
CP039993_293576_293668	2.71151	-2.38313	1.08917	-2.18802	0.0286683	0.100674	3	1	0	4	2	1	1	1	2	4	7	10
EA674_01200|imidazole_glycerol_phosphate_synthase_subunit_HisF	259.636	0.282822	0.129349	2.1865	0.028779	0.100996	374	269	281	349	184	299	192	182	292	300	233	254
EA674_14705|outer_membrane_protein	1652.31	-0.181226	0.0829261	-2.1854	0.0288597	0.101175	2317	1626	1635	2051	880	1599	1203	1256	1609	2217	2022	2306
EA674_08655|DUF2057_domain-containing_protein	18.344	0.924619	0.423113	2.18528	0.0288685	0.101175	22	23	15	27	16	22	18	21	20	10	8	15
EA674_02110|50S_ribosomal_protein_L5	13404	0.199367	0.0912448	2.18497	0.0288912	0.101187	18268	13748	14918	17670	9431	14142	11329	9416	13735	16080	13261	13160
EA674_16100|3'-5'_exonuclease	195.138	0.305898	0.140161	2.18247	0.0290747	0.101762	268	214	208	234	138	189	173	171	203	202	192	186
EA674_13290|NADH:flavin_oxidoreductase/NADH_oxidase_family_protein	106.889	0.396655	0.181812	2.18168	0.029133	0.101847	146	149	116	165	59	112	85	70	108	92	130	104
EA674_17205|polyphosphate--AMP_phosphotransferase	69.7063	-0.47853	0.219347	-2.18161	0.0291381	0.101847	93	69	63	72	30	70	36	57	69	91	94	141
EA674_04450|hypothetical_protein	2019.47	0.161195	0.0739729	2.17911	0.0293234	0.102377	2537	2109	2094	2596	1472	1991	1993	1347	2311	1995	2061	2245
EA674_05985|hypothetical_protein	39.8263	-0.580682	0.266485	-2.17904	0.0293284	0.102377	54	42	37	32	15	31	21	36	31	67	70	69
EA674_14115|methionine_synthase	588.065	0.198693	0.0912236	2.17809	0.0293995	0.102556	862	645	570	759	433	587	468	429	634	648	590	632
CP039993_29484_29832	342.932	0.225508	0.103621	2.17627	0.029535	0.102961	481	366	336	490	227	368	270	272	378	342	355	351
EA674_19725|replication_initiation_protein	145.294	-0.328499	0.150995	-2.17557	0.0295875	0.103075	200	134	131	178	65	151	116	112	138	189	203	211
EA674_13515|phage_tail_protein	10.0031	-1.30949	0.602597	-2.17308	0.0297739	0.103602	14	5	6	0	8	7	4	9	9	17	18	28
EA674_14765|arginyltransferase	122.614	-0.351912	0.161945	-2.17303	0.0297781	0.103602	190	119	123	169	41	127	56	93	94	206	169	193
CP039993_3346161_3346491	4.73373	-1.70743	0.786391	-2.17122	0.0299146	0.104008	8	3	1	1	1	4	4	2	0	13	11	15
CP039993_3334350_3334685	414.304	-0.24379	0.112306	-2.17076	0.0299493	0.104059	546	410	436	512	232	361	296	262	444	615	491	610
EA674_01765|hypothetical_protein	232.558	0.331176	0.152676	2.16914	0.0300719	0.104416	304	311	239	306	191	252	157	183	197	258	221	230
CP039993_1177599_1177705	2.61989	2.89044	1.33344	2.16766	0.0301846	0.104683	4	4	6	3	0	4	5	1	3	1	1	0
EA674_13760|hypothetical_protein	7.12111	-1.40881	0.649937	-2.16761	0.0301887	0.104683	11	4	3	15	4	7	2	2	0	14	17	17
EA674_02580|hypothetical_protein	74.6662	-0.445621	0.205689	-2.16648	0.0302744	0.104911	83	82	58	80	52	82	59	55	57	110	96	110
EA674_03200|response_regulator	23.2446	-0.797489	0.368269	-2.16551	0.0303488	0.105028	40	18	11	27	14	12	15	18	21	46	40	34
CP039993_805504_805585	4.12771	-1.74889	0.80768	-2.16533	0.0303626	0.105028	3	3	2	4	1	4	2	2	5	9	8	11
EA674_04550|DUF4845_domain-containing_protein	201.528	0.282703	0.130564	2.16525	0.0303682	0.105028	278	237	187	274	142	201	180	135	252	205	197	196
EA674_13145|SDR_family_NAD(P)-dependent_oxidoreductase	2.56127	3.55974	1.6461	2.16253	0.0305776	0.105683	7	0	0	0	5	3	3	3	7	0	0	0
EA674_18125|OprD_family_porin	1434.24	0.235178	0.108797	2.16161	0.0306482	0.105857	1718	1664	1501	1961	1162	1339	1404	859	1584	1594	1418	1333
EA674_12270|redox-sensitive_transcriptional_activator_SoxR	27.4303	-0.736254	0.340799	-2.16038	0.0307433	0.106116	38	20	17	38	11	17	22	24	33	50	39	38
EA674_08190|hypothetical_protein	75.9314	0.443076	0.205161	2.15965	0.0308001	0.106242	91	80	83	110	58	80	71	57	98	52	62	82
EA674_02065|50S_ribosomal_protein_L2	19415	0.195052	0.0903603	2.15861	0.0308806	0.10645	27155	20271	21458	25417	13010	20759	15833	13468	20288	23900	19161	19398
EA674_10480|RraA_family_protein	12.2183	-1.12538	0.52163	-2.15743	0.0309723	0.106696	4	12	6	20	6	16	12	7	18	13	20	18
EA674_14040|FtsX-like_permease_family_protein	60.7479	-0.473801	0.219668	-2.1569	0.0310136	0.106731	67	64	53	67	40	71	36	37	60	77	88	102
EA674_02620|bifunctional_tRNA_(5-methylaminomethyl-2-thiouridine)(34)-methyltransferase_MnmD/FAD-dependent_5-carboxymethylaminomethyl-2-thiouridine(34)_oxidoreductase_MnmC	136.996	0.351975	0.163195	2.15678	0.031023	0.106731	162	182	141	168	103	119	129	97	170	115	141	143
EA674_10860|lipid_A_export_permease/ATP-binding_protein_MsbA	504.622	0.2126	0.0986322	2.15548	0.031124	0.106995	631	601	505	651	388	512	436	331	573	502	528	536
CP039993_2560857_2560936	14.4963	-1.01924	0.472908	-2.15527	0.0311407	0.106995	15	11	13	22	4	16	10	1	17	32	28	22
CP039993_1728165_1728535	1.39986	3.55941	1.6522	2.15434	0.0312133	NA	1	2	3	2	1	3	1	2	1	0	0	0
EA674_01855|hypothetical_protein	0.848686	-4.10595	1.90639	-2.15378	0.0312575	NA	0	0	0	1	0	1	0	0	0	2	4	4
CP039993_3486624_3486678	14.1644	1.02304	0.475694	2.15063	0.0315051	0.108111	19	30	22	19	11	13	6	3	18	11	17	9
EA674_00915|response_regulator	169.167	-0.308818	0.143611	-2.15038	0.0315252	0.108111	208	164	137	246	80	191	117	148	175	225	215	212
EA674_16595|2-isopropylmalate_synthase	1018.77	-0.194943	0.0906627	-2.1502	0.0315395	0.108111	1476	984	945	1378	550	1050	717	699	1036	1192	1355	1472
EA674_15085|8-amino-7-oxononanoate_synthase	48.0892	0.538616	0.250508	2.15009	0.0315478	0.108111	70	55	45	80	40	43	48	32	55	41	41	39
EA674_16470|23S_rRNA_(adenine(2503)-C(2))-methyltransferase_RlmN	980.506	0.174916	0.0813706	2.14962	0.0315853	0.108141	1302	1078	989	1278	669	1054	906	646	1065	1040	1023	1041
EA674_01090|hypothetical_protein	5.94005	-1.46564	0.681866	-2.14945	0.0315988	0.108141	9	4	2	9	2	6	2	3	1	7	15	20
EA674_16930|Zn-dependent_hydrolase	85.674	-0.395337	0.183946	-2.1492	0.0316185	0.108141	116	81	74	137	37	94	63	58	64	120	123	125
CP039993_3290734_3291055	965.53	0.429579	0.200157	2.14621	0.0318561	0.108882	1058	1270	1020	1088	840	931	1049	670	1040	659	939	1046
EA674_00340|IclR_family_transcriptional_regulator	86.3914	-0.412852	0.192386	-2.14596	0.0318764	0.108882	108	91	66	118	49	77	59	60	95	139	117	108
CP039993_1887987_1888063	3.92311	-2.44943	1.1416	-2.14562	0.0319033	0.108903	0	0	3	5	2	3	11	1	4	3	4	11
EA674_01030|NAD-dependent_succinate-semialdehyde_dehydrogenase	3571.63	0.155452	0.0724693	2.14508	0.0319464	0.108979	4739	3757	3813	5096	2279	3925	2834	2645	3637	4020	3757	3730
EA674_06110|DUF2726_domain-containing_protein	9.21361	-1.28461	0.600753	-2.13833	0.0324899	0.110761	6	6	3	17	5	15	9	11	3	10	11	17
EA674_07135|3-hydroxyacyl-CoA_dehydrogenase	453.583	0.24317	0.113733	2.13807	0.0325109	0.110761	681	428	395	702	259	605	321	431	491	437	432	433
EA674_05930|hypothetical_protein	4.22644	-1.77654	0.831072	-2.13764	0.0325457	0.110784	2	3	4	6	0	4	4	0	1	10	9	14
CP039993_2146178_2146264	3.30271	2.50918	1.1739	2.13747	0.0325599	0.110784	8	8	1	0	6	3	4	1	4	1	2	0
CP039993_3431139_3431307	22.7315	-0.801894	0.375231	-2.13707	0.0325925	0.110823	19	28	19	29	6	12	15	13	30	46	40	35
CP039993_3573568_3573624	2.336	-2.70298	1.26509	-2.13659	0.0326318	0.110852	1	1	1	2	0	3	1	1	1	3	1	17
CP039993_2268435_2268842	48.1104	0.542566	0.253958	2.13644	0.0326432	0.110852	94	56	61	70	23	59	22	33	46	39	64	46
EA674_05380|GTPase	80.6311	-0.390677	0.183072	-2.13401	0.0328417	0.111454	100	82	81	104	38	75	57	51	75	112	125	122
EA674_16490|glycosyltransferase_family_1_protein	56.373	-0.488942	0.229212	-2.13314	0.0329134	0.111625	61	56	66	55	31	57	35	35	44	82	77	112
CP039993_818703_818757	13.1205	1.04074	0.487956	2.13286	0.0329362	0.11163	17	20	21	12	10	15	9	14	9	11	5	14
EA674_08715|peptidase_M16	917.02	0.170028	0.0797932	2.13085	0.0331012	0.112117	1277	1051	926	1243	632	926	774	603	932	1012	980	1011
EA674_01060|GFA_family_protein	41.9435	-0.566101	0.265729	-2.13037	0.0331408	0.112179	56	50	26	47	19	34	24	37	37	64	72	65
EA674_15500|hypothetical_protein	13.2925	-0.994438	0.467263	-2.12822	0.0333192	0.11271	16	12	8	19	3	11	4	12	14	15	30	29
EA674_12620|MFS_transporter	5.12743	-1.6811	0.790213	-2.12741	0.0333864	0.112864	6	1	2	10	0	11	3	3	3	13	7	9
EA674_03745|succinate_dehydrogenase_flavoprotein_subunit	6673.29	0.145596	0.0684646	2.12658	0.0334547	0.113022	9353	7249	6740	8705	4566	6837	5481	4752	6983	7823	6846	7192
EA674_01860|DUF1311_domain-containing_protein	4.71917	-2.0554	0.967816	-2.12375	0.0336911	0.113748	2	0	3	3	4	9	2	7	4	7	2	13
EA674_03355|Asp-tRNA(Asn)/Glu-tRNA(Gln)_amidotransferase_subunit_GatA	906.696	0.185309	0.0873439	2.1216	0.0338713	0.114283	1289	979	886	1214	656	970	805	607	917	1014	916	938
CP039993_3479272_3479323	105.103	0.405526	0.191173	2.12126	0.0339002	0.114289	133	128	134	140	86	105	86	67	95	126	92	95
EA674_12290|GNAT_family_N-acetyltransferase	22.8085	-0.789449	0.372195	-2.12106	0.0339166	0.114289	27	26	14	19	7	27	12	17	23	46	25	49
EA674_17025|AarF/ABC1/UbiB_kinase_family_protein	158.264	-0.312392	0.147446	-2.11869	0.034117	0.114891	223	172	131	199	75	170	100	113	150	191	229	255
EA674_08975|MFS_transporter	25.1137	-0.682479	0.32225	-2.11785	0.0341875	0.114946	29	21	21	33	15	23	15	17	25	34	47	37
EA674_09600|helix-turn-helix_transcriptional_regulator	3.87153	-1.77643	0.838795	-2.11783	0.0341894	0.114946	2	2	4	3	2	1	4	0	3	8	13	8
EA674_02960|MHS_family_MFS_transporter	184.459	-0.273875	0.129326	-2.11772	0.0341991	0.114946	261	179	186	229	102	179	127	113	173	259	266	258
EA674_01935|ABC_transporter_ATP-binding_protein	253.96	0.26904	0.127117	2.11648	0.0343041	0.115188	318	284	275	306	183	252	246	176	302	268	211	283
EA674_13705|hypothetical_protein	2.16408	-2.49403	1.17846	-2.11635	0.0343151	0.115188	2	2	0	0	0	0	1	0	2	4	10	9
EA674_15155|signal_recognition_particle_protein	1565.39	0.160887	0.0761802	2.11193	0.0346927	0.116381	2287	1586	1663	2065	1015	1592	1292	1152	1619	1758	1670	1695
CP039993_3240685_3241041	63.8694	0.496875	0.235429	2.11051	0.0348146	0.116667	100	55	84	74	60	60	50	51	64	61	49	66
EA674_11205|Lrp/AsnC_family_transcriptional_regulator	87.8683	0.418958	0.198519	2.11042	0.0348222	0.116667	138	129	71	126	55	83	77	57	99	90	77	94
EA674_00485|hypothetical_protein	1077.48	0.1728	0.0819857	2.10769	0.0350578	0.117368	1374	1250	1146	1389	757	1066	904	769	1117	1110	1121	1272
EA674_08385|DNA-cytosine_methyltransferase	14.9788	0.942064	0.447011	2.10748	0.0350764	0.117368	21	21	22	18	14	13	7	9	23	15	9	11
EA674_09095|hypothetical_protein	602.673	-0.199365	0.0947042	-2.10513	0.0352798	0.117974	746	604	593	848	355	617	501	396	553	711	770	846
EA674_03900|ribosome_assembly_RNA-binding_protein_YhbY	222.303	0.291285	0.138394	2.10475	0.0353129	0.118005	273	292	234	273	179	197	208	140	237	246	214	224
EA674_18410|threonine_transporter_RhtB	48.0189	0.567173	0.269504	2.10451	0.0353341	0.118005	83	73	41	70	44	41	35	19	57	39	48	50
EA674_17880|hypothetical_protein	16.3474	-0.929241	0.441897	-2.10284	0.0354794	0.118415	21	15	5	25	4	17	9	17	17	22	35	22
EA674_10655|3'(2'),5'-bisphosphate_nucleotidase_CysQ	118.048	-0.353262	0.168062	-2.10197	0.0355559	0.118549	166	105	98	148	74	118	100	69	120	129	168	189
CP039993_3937551_3937717	302.883	0.261918	0.124612	2.10187	0.0355646	0.118549	413	344	334	362	211	308	269	204	333	366	302	278
EA674_15565|LysE_family_translocator	1.80721	-3.38682	1.61297	-2.09975	0.0357512	NA	0	0	1	1	2	4	0	0	3	2	2	8
EA674_11430|amidohydrolase	29.1461	-0.65742	0.313275	-2.09854	0.0358576	0.119449	33	29	26	47	15	23	21	11	26	47	39	59
CP039993_1385169_1385223	42.0052	0.587725	0.280352	2.09638	0.0360483	0.120009	53	61	44	54	40	36	30	35	44	45	30	35
EA674_06950|50S_ribosomal_protein_L11_methyltransferase	439.063	0.222235	0.106071	2.09516	0.0361564	0.120292	595	517	437	602	289	522	340	281	489	465	444	472
EA674_01585|DNA-directed_RNA_polymerase_subunit_omega	999.022	0.179927	0.0859108	2.09434	0.0362293	0.120458	1453	1158	893	1213	719	1009	884	662	1149	1075	1065	1049
EA674_15305|cold_shock_domain-containing_protein	258.994	0.247336	0.118119	2.09397	0.036263	0.120494	365	276	256	345	174	282	223	205	278	265	227	292
CP039993_3206364_3206549	57.6528	0.534758	0.255445	2.09343	0.0363106	0.120576	61	69	68	65	58	71	52	39	61	59	43	42
EA674_15895|type_II_secretion_system_protein_GspE	89.4624	-0.393247	0.187978	-2.09198	0.0364401	0.12093	107	69	73	121	47	108	78	67	106	102	120	116
EA674_08255|di-trans,poly-cis-decaprenylcistransferase	569.057	0.219856	0.105156	2.09075	0.0365504	0.121219	678	696	579	730	416	571	520	382	644	622	560	575
EA674_19510|type_IV_secretion_system_protein_VirD4	1.82875	3.6512	1.74743	2.08946	0.0366661	0.121526	4	3	0	9	1	0	0	2	5	0	0	0
EA674_03270|hypothetical_protein	45.0618	0.546117	0.261584	2.08773	0.0368222	0.121966	64	59	46	64	34	46	47	28	44	40	49	31
EA674_04530|Do_family_serine_endopeptidase	131.334	0.363045	0.173942	2.08716	0.0368738	0.121995	248	161	103	207	59	169	85	119	104	131	130	144
EA674_03490|patatin-like_phospholipase_family_protein	152.73	0.315399	0.151117	2.08712	0.0368772	0.121995	244	179	158	207	102	150	139	85	159	169	133	181
EA674_13690|hypothetical_protein	3.72956	-1.84878	0.886194	-2.0862	0.0369603	0.122193	4	4	0	4	1	1	3	2	1	14	9	6
EA674_15675|quinolinate_synthase_NadA	224.562	0.252542	0.121191	2.08384	0.037175	0.122807	326	257	223	314	141	243	176	162	247	241	219	241
CP039993_103742_103854	481.43	0.243812	0.117026	2.0834	0.0372143	0.122807	608	645	476	620	343	490	362	343	522	441	541	548
CP039993_1760213_1760472	142.073	-0.323719	0.155381	-2.08338	0.0372164	0.122807	197	132	127	193	79	152	99	93	134	154	214	222
CP039993_1414590_1414824	1.09436	-3.7857	1.8177	-2.08269	0.0372799	NA	0	0	0	1	2	0	2	0	0	1	4	3
EA674_08270|RIP_metalloprotease_RseP	642.371	0.188299	0.0904485	2.08184	0.0373574	0.123195	814	720	680	832	465	669	513	466	709	668	641	723
EA674_15680|bifunctional_glutamate_N-acetyltransferase/amino-acid_acetyltransferase_ArgJ	219.325	0.28132	0.135276	2.0796	0.0375622	0.123719	368	244	220	341	148	249	150	143	188	219	224	262
CP039993_2630638_2630912	48.0251	-0.617857	0.297105	-2.07959	0.0375634	0.123719	64	45	36	58	11	65	42	19	52	85	76	67
EA674_01500|type_IV_pilus_secretin_PilQ	14.4726	-0.989006	0.475731	-2.07892	0.0376249	0.123844	21	7	8	18	4	8	10	15	21	23	26	23
CP039993_2725321_2725386	2.74705	3.06184	1.47423	2.07691	0.0378103	0.124376	6	1	2	2	4	4	5	2	4	0	1	0
EA674_01755|hypothetical_protein	58.6131	-0.487914	0.235049	-2.0758	0.0379123	0.124633	68	46	54	74	35	59	49	40	62	56	80	110
EA674_06640|hypothetical_protein	31.6789	0.671975	0.323823	2.07513	0.0379742	0.124759	39	28	38	35	33	32	43	22	34	25	17	27
EA674_18335|glutathione_peroxidase	215.434	-0.280991	0.135636	-2.07166	0.0382973	0.125741	296	191	201	284	154	198	147	164	186	288	297	277
EA674_03730|citrate_(Si)-synthase	6376.88	0.19556	0.0944202	2.07117	0.0383431	0.12576	10175	6316	6454	8941	4064	6868	4628	4898	6542	7709	6248	6562
EA674_19120|matrixin_family_metalloprotease	11.346	1.10639	0.534206	2.07109	0.0383508	0.12576	20	16	10	13	5	19	6	14	14	4	10	8
EA674_05460|LysR_family_transcriptional_regulator	13.053	-0.958318	0.4629	-2.07025	0.0384292	0.125939	12	6	19	13	4	10	7	11	8	28	23	25
EA674_12615|DUF2147_domain-containing_protein	6.49314	-1.2801	0.618818	-2.06862	0.0385817	0.126359	8	7	5	6	3	3	2	0	3	22	16	12
EA674_15945|thioredoxin	461.543	0.222264	0.107461	2.06833	0.0386093	0.126371	752	439	486	631	277	524	337	375	449	466	502	510
EA674_06935|bifunctional_phosphoribosylaminoimidazolecarboxamide_formyltransferase/IMP_cyclohydrolase	2270.62	0.156587	0.0757402	2.06743	0.038694	0.126569	3185	2450	2314	2913	1705	2224	1981	1490	2348	2601	2352	2438
EA674_19280|hypothetical_protein	1.10585	3.8557	1.86507	2.06732	0.0387038	NA	4	4	0	1	0	3	0	2	0	0	0	0
EA674_16760|HdeD_family_acid-resistance_protein	17.5677	-0.882753	0.427363	-2.06558	0.038868	0.127059	25	10	13	15	8	22	11	11	19	17	28	46
CP039993_2472280_2472341	4.46814	-1.57926	0.765408	-2.0633	0.0390846	0.127688	4	3	3	6	2	5	2	1	2	7	14	10
EA674_04095|TetR/AcrR_family_transcriptional_regulator	2.7126	2.83581	1.37464	2.06295	0.0391177	0.127716	7	6	1	2	0	7	2	3	4	0	0	2
EA674_02610|YajQ_family_cyclic_di-GMP-binding_protein	226.743	0.299443	0.145184	2.0625	0.0391599	0.127775	281	257	192	341	180	238	256	166	227	179	212	226
EA674_19030|lipoprotein_signal_peptidase	380.569	0.214628	0.104121	2.06133	0.0392716	0.128059	562	424	351	508	266	399	342	277	379	395	373	422
CP039993_2434518_2434761	39.9242	-0.654307	0.317491	-2.06086	0.039316	0.128125	53	39	35	64	6	61	18	13	34	58	72	77
CP039993_773681_773743	945.498	0.190827	0.0926536	2.05957	0.0394395	0.128448	1164	1045	989	1237	702	965	756	693	1114	1035	925	970
EA674_05465|BCCT_family_transporter	9.56422	-1.26139	0.613916	-2.05466	0.039912	0.129906	14	3	3	16	6	6	10	4	13	6	18	24
EA674_15075|ATP-dependent_dethiobiotin_synthetase_BioD	30.1886	0.642057	0.313211	2.04992	0.0403725	0.131281	41	34	33	40	25	33	31	24	31	19	31	22
EA674_07625|acyl-CoA_thioesterase	27.5799	-0.669711	0.326729	-2.04974	0.0403896	0.131281	31	23	18	31	16	30	16	29	29	35	47	36
EA674_10890|nucleotidyltransferase_family_protein	186.106	0.29595	0.144411	2.04936	0.0404273	0.131281	265	208	211	206	129	210	148	127	209	219	178	182
EA674_09570|hypothetical_protein	5.87838	-1.43535	0.700417	-2.04928	0.0404345	0.131281	6	3	4	10	2	2	4	2	8	15	13	8
EA674_00610|hypothetical_protein	27.2584	-0.661344	0.32285	-2.04846	0.0405151	0.131461	25	19	35	30	13	23	18	20	27	45	41	46
CP039993_1087158_1087625	253.107	0.259532	0.126764	2.04736	0.0406226	0.131729	355	279	255	315	207	285	186	182	271	264	251	255
EA674_02085|50S_ribosomal_protein_L16	14547.7	0.168639	0.0824009	2.04656	0.0407009	0.131886	19311	14970	15915	19402	9564	15795	11454	11248	15244	17010	14627	14881
EA674_09790|type_1_fimbrial_protein	87.6452	0.394309	0.192688	2.04636	0.0407212	0.131886	111	106	95	121	71	104	79	51	88	88	79	81
EA674_05780|hypothetical_protein	18.029	-0.76714	0.375032	-2.04553	0.0408027	0.132068	20	15	21	19	13	13	8	8	13	28	34	38
EA674_08955|phosphotransferase_family_protein	48.4859	-0.514717	0.251667	-2.04523	0.0408323	0.132069	57	39	45	52	31	41	33	42	52	53	69	88
CP039993_3680659_3680784	84.2069	0.419334	0.205052	2.04502	0.0408533	0.132069	124	82	105	103	53	72	70	83	94	82	76	84
EA674_03385|ribonuclease_G	289.945	0.24961	0.122079	2.04466	0.0408883	0.132101	386	342	314	367	211	285	265	196	283	330	303	280
CP039993_3461547_3461694	7.61421	-1.33145	0.651648	-2.04321	0.0410318	0.132483	5	4	4	14	4	7	12	3	8	8	15	11
EA674_13045|M23_family_metallopeptidase	21.346	-0.735085	0.35998	-2.04201	0.0411502	0.132784	20	19	19	27	11	16	26	9	20	32	35	34
CP039993_3163375_3163521	64.8105	-0.409712	0.200688	-2.04154	0.0411971	0.132853	89	68	61	70	38	57	42	46	46	98	99	103
EA674_02605|DUF4442_domain-containing_protein	145.779	0.314867	0.154255	2.04121	0.0412296	0.132876	192	148	146	192	115	166	143	105	161	144	143	118
EA674_13040|ATP-dependent_chaperone_ClpB	1012.97	-0.254392	0.124706	-2.03994	0.0413566	0.133204	1464	930	820	1473	482	1028	716	816	1123	1096	1342	1491
EA674_02665|protein_translocase_subunit_SecD	1183.88	0.16294	0.0799464	2.03811	0.0415389	0.133709	1583	1328	1245	1508	859	1204	978	789	1247	1338	1265	1262
CP039993_814025_814224	30.9739	-0.718614	0.352899	-2.03632	0.0417186	0.134199	18	27	31	30	33	24	28	20	27	62	37	34
EA674_12820|hypothetical_protein	9.40756	-1.11872	0.549448	-2.03608	0.0417423	0.134199	6	8	7	10	7	11	9	6	4	13	19	16
EA674_18460|PadR_family_transcriptional_regulator	86.3192	0.390455	0.191878	2.03491	0.0418599	0.134495	116	89	106	103	56	101	76	60	105	72	88	88
EA674_13845|endonuclease_III	97.4024	0.387015	0.190257	2.03418	0.0419339	0.13465	167	102	89	169	60	114	68	66	110	90	102	88
EA674_12965|DUF1653_domain-containing_protein	60.8666	-0.481058	0.236561	-2.03354	0.0419978	0.134773	93	61	49	81	24	51	35	42	57	66	100	126
EA674_16175|hypothetical_protein	720.778	-0.204733	0.100769	-2.03172	0.0421823	0.135282	966	688	750	893	461	686	551	441	709	1080	870	923
EA674_09445|fumarylacetoacetate_hydrolase	1.93812	3.13673	1.5442	2.03131	0.0422238	0.135333	3	3	3	1	1	0	3	1	7	0	0	1
EA674_12385|type_VI_secretion_system_baseplate_subunit_TssE	20.887	-0.793161	0.390565	-2.0308	0.042275	0.135414	22	13	21	21	15	12	23	17	11	30	40	31
EA674_12940|beta-ketoacyl-ACP_synthase_III	460.899	0.195811	0.096437	2.03045	0.0423104	0.135445	685	505	443	619	312	474	358	326	526	481	459	534
EA674_11545|malonate_decarboxylase_subunit_epsilon	12.3132	-1.02478	0.505329	-2.02795	0.0425657	0.136178	7	17	6	20	2	16	7	12	6	13	21	31
EA674_14315|acyl-CoA_thioesterase	133.208	0.328796	0.162152	2.0277	0.0425912	0.136178	219	129	142	179	85	162	95	94	153	137	119	146
EA674_14745|threonine_export_protein_RhtC	53.715	-0.493383	0.243362	-2.02736	0.0426257	0.136197	69	54	44	56	24	55	28	38	70	81	81	81
EA674_09580|hypothetical_protein	12.5098	-0.947037	0.467181	-2.02713	0.0426492	0.136197	12	11	9	16	5	7	13	10	10	21	25	18
EA674_02495|symmetrical_bis(5'-nucleosyl)-tetraphosphatase	153.507	0.304021	0.150011	2.02665	0.0426978	0.13627	228	175	125	202	121	158	150	105	177	143	154	143
EA674_06920|methionine_ABC_transporter_ATP-binding_protein	1167.38	0.171566	0.0847216	2.02506	0.0428614	0.136709	1544	1271	1161	1424	808	1260	1083	813	1307	1124	1318	1229
EA674_15080|malonyl-ACP_O-methyltransferase_BioC	29.4302	0.660238	0.326197	2.02405	0.0429653	0.136941	40	60	34	46	17	27	17	16	25	32	34	23
EA674_10540|alkane_1-monooxygenase	28.4004	-0.661458	0.326833	-2.02384	0.0429864	0.136941	34	15	38	26	15	24	26	12	25	51	42	51
EA674_19730|helix-turn-helix_domain-containing_protein	56.7806	-0.454934	0.224968	-2.02222	0.0431541	0.137392	79	48	46	74	35	67	31	40	53	87	69	88
EA674_12090|catalase_family_peroxidase	30.2024	-0.652702	0.323121	-2.01999	0.0433842	0.138041	23	29	30	29	19	40	24	19	24	53	45	38
CP039993_647211_647269	63.707	0.494453	0.244886	2.01912	0.0434751	0.138246	76	68	97	98	36	77	55	38	64	45	60	77
EA674_10395|PepSY_domain-containing_protein	12.6551	0.965511	0.478407	2.01818	0.0435725	0.138472	23	16	16	13	9	16	12	10	10	14	9	6
EA674_01300|RNA-binding_transcriptional_accessory_protein	870.234	0.178739	0.0887688	2.01354	0.0440582	0.139931	1233	990	819	1218	592	865	665	669	942	978	883	918
EA674_19545|hypothetical_protein	1.27735	3.56746	1.77194	2.01331	0.0440819	NA	1	2	3	4	2	1	2	0	0	0	0	0
EA674_07085|hypothetical_protein	22.3138	0.696905	0.346283	2.01253	0.0441641	0.140182	46	28	24	32	11	19	17	18	24	21	18	23
EA674_17060|SAM-dependent_methyltransferase	37.4058	0.63605	0.316351	2.01059	0.0443692	0.140748	50	52	27	63	42	43	32	23	35	21	35	30
EA674_15070|23S_rRNA_pseudouridine(2605)_synthase_RluB	701.313	0.172532	0.085887	2.00883	0.0445553	0.141236	964	818	697	873	496	702	610	438	788	784	709	793
CP039993_1660369_1660604	48.5581	0.591452	0.294456	2.00863	0.0445769	0.141236	55	63	56	77	32	48	53	46	35	53	43	25
CP039993_1335980_1336267	7.6308	-1.39061	0.692467	-2.00819	0.0446233	0.141298	1	9	6	6	2	11	1	9	5	19	6	21
EA674_07030|cytochrome_o_ubiquinol_oxidase_subunit_I	16811.5	0.138985	0.0692235	2.00777	0.0446674	0.141353	23506	17653	17542	22132	11344	17815	13876	11689	17280	19647	17630	17988
CP039993_441872_441979	5180.59	0.186852	0.093138	2.00618	0.0448368	0.141803	7105	5527	5861	6572	3494	5399	4022	3726	5390	6462	5165	5286
CP039993_1273922_1274068	3.76975	2.26932	1.13201	2.00469	0.0449963	0.142136	5	6	3	4	6	4	5	4	2	3	0	0
EA674_17125|type_II_secretion_system_protein_GspG	73.2595	-0.41064	0.204848	-2.00461	0.0450047	0.142136	99	74	60	91	51	79	42	48	58	101	123	95
EA674_08780|3-deoxy-7-phosphoheptulonate_synthase	641.987	-0.199426	0.0994923	-2.00444	0.0450233	0.142136	806	659	611	796	418	560	610	430	592	780	815	887
CP039993_1107184_1107238	79.0882	0.426133	0.212636	2.00405	0.0450647	0.142181	110	77	91	102	52	80	72	76	86	89	56	70
CP039993_174362_174589	2.14726	2.93775	1.46627	2.00354	0.045119	0.142267	7	8	0	2	1	0	4	1	2	0	0	2
CP039993_3354933_3355119	1.20199	-3.3922	1.69518	-2.00108	0.0453837	NA	0	1	0	2	0	1	0	0	1	2	3	7
CP039993_1914719_1914966	2.06941	2.80456	1.40592	1.99483	0.0460614	0.145151	9	3	2	4	1	1	3	1	1	0	0	2
CP039993_2796939_2797008	3.12575	-1.92456	0.965022	-1.99432	0.0461176	0.145241	1	5	0	3	1	1	2	1	3	7	9	8
CP039993_2349170_2349273	48.8155	0.526168	0.263872	1.99403	0.0461491	0.145254	59	75	68	77	35	52	28	24	44	44	46	59
EA674_03005|CoA_transferase	16.7432	-0.797043	0.399958	-1.99282	0.0462817	0.145584	31	11	11	18	8	17	8	8	14	27	30	36
EA674_05310|NUDIX_hydrolase	232.256	0.248972	0.124954	1.9925	0.0463163	0.145605	334	250	257	277	141	246	193	186	246	249	239	247
EA674_09030|transcriptional_regulator_FeaR	17.4511	-0.787196	0.395215	-1.99182	0.0463912	0.145684	18	21	10	28	9	15	6	13	16	26	28	34
EA674_04545|signal_peptidase_I	633.796	0.186323	0.0935464	1.99177	0.0463967	0.145684	823	740	625	850	422	639	604	425	685	678	631	695
EA674_16000|50S_ribosomal_protein_L35	6565.48	0.179922	0.090345	1.99149	0.0464265	0.14569	8973	7334	7225	8139	4684	6502	5405	4344	6827	8255	6653	6711
EA674_07505|TonB-dependent_siderophore_receptor	10.5127	1.11239	0.559142	1.98946	0.0466509	0.146307	8	28	14	17	6	7	6	7	12	9	7	9
CP039993_3972072_3972162	15.192	0.874939	0.440045	1.9883	0.046779	0.146621	24	13	23	25	10	21	10	15	11	14	11	9
EA674_17530|DNA_transfer_protein_p32	79.6819	0.396131	0.199277	1.98784	0.0468295	0.146691	120	73	84	133	53	91	56	70	88	65	65	88
EA674_05165|DUF962_domain-containing_protein	71.9499	-0.418162	0.21067	-1.98492	0.0471534	0.147618	97	73	59	94	37	60	47	47	83	83	124	109
EA674_12105|hypothetical_protein	37.2308	-0.607823	0.306271	-1.98459	0.0471901	0.147645	45	38	33	30	24	35	22	26	30	80	33	71
EA674_05995|Arc_family_DNA-binding_protein	29.0695	-0.610111	0.307693	-1.98286	0.0473832	0.148161	31	30	24	33	12	38	17	18	31	46	47	42
CP039993_1626257_1626410	7.29138	-1.14441	0.577592	-1.98134	0.0475533	0.148604	10	5	6	5	3	5	4	4	5	11	15	22
EA674_18025|hypothetical_protein	34.1498	-0.542351	0.274004	-1.97936	0.0477758	0.149211	37	42	38	37	14	24	24	19	22	61	60	58
CP039993_1159520_1159847	2.31232	2.67461	1.35167	1.97874	0.0478456	0.14934	3	6	3	4	2	1	1	2	4	0	1	1
EA674_17235|bifunctional_phosphoribosyl-AMP_cyclohydrolase/phosphoribosyl-ATP_diphosphatase_HisIE	288.25	0.223038	0.112737	1.97838	0.0478856	0.149376	401	340	283	372	201	283	262	208	290	288	289	335
CP039993_3231954_3232096	32.7224	0.581909	0.294201	1.97793	0.047937	0.149447	51	37	36	40	26	33	26	30	33	23	29	34
EA674_08640|hypothetical_protein	87.1342	-0.415574	0.210242	-1.97665	0.0480818	0.14981	98	94	63	123	36	97	65	73	93	94	103	158
CP039993_3008551_3008618	4.36494	-1.57055	0.794951	-1.97565	0.048194	0.15007	4	2	4	2	0	6	4	2	2	11	8	12
EA674_05555|TetR/AcrR_family_transcriptional_regulator	2.53891	2.94372	1.49211	1.97286	0.0485121	0.150954	3	4	1	7	0	8	1	5	1	0	1	0
CP039993_812190_812503	424.979	0.213958	0.108462	1.97265	0.0485354	0.150954	580	441	508	552	305	399	371	264	454	450	414	515
CP039993_351843_352052	40.9414	-0.547844	0.278093	-1.97	0.0488379	0.151805	56	38	36	76	9	41	19	30	33	51	82	63
CP039993_698700_699298	426.006	-0.240709	0.122236	-1.96922	0.048928	0.151995	530	435	354	482	295	447	347	347	396	451	589	576
EA674_08325|haloacid_dehalogenase	75.4029	-0.391826	0.199061	-1.96837	0.0490253	0.152207	87	79	66	77	49	66	69	51	73	87	121	109
EA674_13455|hypothetical_protein	1.59663	-3.03313	1.54217	-1.9668	0.0492061	NA	1	1	0	0	0	0	0	1	2	5	1	11
CP039993_2828414_2828834	22441.9	-0.203709	0.103656	-1.96524	0.0493869	0.153239	30309	19980	25001	25816	13759	20691	18215	14682	21470	34331	26677	29050
EA674_10360|ABC_transporter_permease	6.75198	-1.21044	0.616042	-1.96486	0.0494306	0.153284	10	6	2	5	5	4	4	2	7	16	14	12
EA674_13510|hypothetical_protein	3.82571	-1.68792	0.859835	-1.96308	0.0496371	0.153834	5	1	2	5	0	3	4	1	4	10	8	8
EA674_02775|hypothetical_protein	57.4099	0.450025	0.229333	1.96233	0.0497246	0.154014	105	63	61	89	34	47	42	51	53	59	57	56
EA674_09545|hypothetical_protein	4.13191	-1.59819	0.814742	-1.96159	0.0498104	0.15413	5	0	4	3	3	2	2	2	4	9	8	11
EA674_13325|chemotaxis_protein	38.9133	-0.520223	0.265217	-1.9615	0.0498207	0.15413	46	35	27	57	23	38	33	30	37	58	45	57
EA674_11020|hypothetical_protein	15.5556	-0.861066	0.439129	-1.96085	0.0498966	0.154274	15	15	10	13	17	11	8	11	15	22	18	36
EA674_05560|pirin_family_protein	40.6211	-0.526192	0.26842	-1.96033	0.0499569	0.154369	45	32	39	53	14	44	38	34	36	59	54	61
CP039993_2636071_2636432	5.21802	-1.63135	0.832405	-1.9598	0.0500188	0.15447	1	5	1	4	5	1	9	2	11	4	10	9
EA674_05005|hypothetical_protein	8.54217	-1.16436	0.594762	-1.95769	0.0502661	0.155142	10	5	5	15	4	2	8	7	7	10	18	18
EA674_04490|sulfate_ABC_transporter_permease_subunit_CysT	3.1608	2.12543	1.08651	1.9562	0.0504415	0.155592	7	9	1	3	2	3	3	0	8	1	1	2
EA674_14420|sigma-70_family_RNA_polymerase_sigma_factor	6.06837	1.3842	0.707809	1.95562	0.0505102	0.155713	19	10	7	11	3	9	0	2	6	2	5	7
EA674_17645|heme_biosynthesis_protein_HemY	58.6709	0.472336	0.241615	1.95491	0.0505938	0.155879	97	60	66	59	47	68	62	33	60	40	68	58
EA674_09500|ABC_transporter_ATP-binding_protein	6.3703	1.30632	0.668475	1.95417	0.0506809	0.156055	14	14	8	9	2	3	9	2	5	6	6	3
EA674_00220|hypothetical_protein	2.16905	-2.48044	1.26952	-1.95384	0.05072	0.156085	2	0	1	1	0	2	2	0	4	2	9	6
EA674_00430|glutamate_racemase	81.8912	-0.389388	0.199575	-1.95109	0.0510465	0.156997	95	82	77	89	67	69	80	30	82	126	96	125
CP039993_3133703_3133925	46.1771	-0.474282	0.243175	-1.95037	0.051132	0.157115	57	40	47	61	25	45	28	38	32	58	80	70
EA674_06270|hypothetical_protein	299.461	0.22167	0.113662	1.95026	0.0511447	0.157115	414	349	305	380	216	302	244	218	309	304	345	302
CP039993_3741_3793	412.591	-0.221427	0.113572	-1.94966	0.0512172	0.157246	502	410	333	517	289	397	361	345	412	438	523	544
EA674_03915|dihydropteroate_synthase	114.494	0.33505	0.172075	1.94711	0.051521	0.157995	193	129	102	174	64	122	92	79	137	111	110	124
EA674_12135|gamma_carbonic_anhydrase_family_protein	423.291	0.426788	0.21919	1.94711	0.0515213	0.157995	416	428	544	451	399	428	501	267	496	331	331	447
EA674_01010|helix-turn-helix_domain-containing_protein	16.9224	0.814797	0.418808	1.94551	0.0517131	0.15849	33	24	20	21	9	15	12	12	21	9	25	11
EA674_17320|triose-phosphate_isomerase	795.074	0.152575	0.0784404	1.9451	0.0517623	0.158549	1080	873	816	994	568	796	693	515	888	844	863	883
EA674_06375|YfhL_family_4Fe-4S_dicluster_ferredoxin	31.056	0.621067	0.319403	1.94446	0.05184	0.158694	54	29	32	45	24	34	19	33	33	25	18	34
EA674_08160|sulfurtransferase_complex_subunit_TusD	371.159	-0.222516	0.114456	-1.94411	0.0518825	0.158732	445	340	402	445	230	369	298	263	369	425	476	550
EA674_04925|hypothetical_protein	22.917	-0.665209	0.342234	-1.94373	0.0519285	0.15878	25	20	20	33	11	18	14	15	28	39	36	32
EA674_17230|FAD-dependent_monooxygenase	9.29024	-1.03096	0.531713	-1.93894	0.0525091	0.160462	11	6	8	10	4	14	3	4	8	14	17	22
CP039993_3442130_3442251	280.435	0.234616	0.121044	1.93826	0.0525911	0.160619	402	281	309	327	194	292	259	214	286	275	303	297
CP039993_182113_182505	27.2993	-0.623061	0.321619	-1.93727	0.0527126	0.160896	34	19	26	23	16	31	26	13	28	35	47	44
CP039993_3538254_3538404	2.59134	-2.18133	1.12903	-1.93204	0.0533548	0.162762	0	1	3	5	1	2	0	0	3	5	6	9
CP039993_1286870_1287091	110.869	0.320551	0.166047	1.93048	0.0535475	0.163243	163	135	126	124	76	124	92	74	102	122	116	115
EA674_11815|methyltransferase_domain-containing_protein	111.733	-0.346034	0.179268	-1.93026	0.0535748	0.163243	159	115	83	155	57	128	68	91	90	122	187	157
CP039993_3534545_3534621	6.46427	-1.41981	0.736429	-1.92797	0.0538594	0.164015	7	2	3	10	5	14	1	4	4	8	5	20
CP039993_206623_206681	10.664	1.09789	0.569919	1.9264	0.0540544	0.164513	15	10	12	24	7	15	11	4	17	7	3	8
CP039993_2651549_2651773	83.0847	-0.361687	0.187808	-1.92584	0.0541248	0.164632	109	89	69	83	61	70	74	45	80	98	117	141
EA674_17355|pyrimidine/purine_nucleoside_phosphorylase	363.208	0.196237	0.101918	1.92545	0.0541734	0.164685	565	414	381	443	219	360	277	275	360	387	415	426
CP039993_1288050_1288153	139.92	-0.305517	0.159078	-1.92056	0.0547876	0.166456	186	132	111	148	99	162	106	102	140	175	191	180
EA674_00285|replication-associated_recombination_protein_A	178.594	-0.295548	0.153916	-1.92019	0.0548336	0.166499	247	167	151	209	79	220	144	130	184	243	224	247
EA674_09745|alpha/beta_hydrolase	10.6687	-0.921006	0.480969	-1.91489	0.0555059	0.168443	16	10	8	8	6	7	6	7	3	19	25	22
EA674_01315|aminotransferase_class_I/II-fold_pyridoxal_phosphate-dependent_enzyme	27.5991	-0.584138	0.305282	-1.91344	0.0556919	0.16891	39	29	32	28	9	11	14	19	20	53	49	54
EA674_18430|arginine--tRNA_ligase	752.498	0.178462	0.0932937	1.9129	0.0557606	0.16902	1107	793	737	1110	517	771	604	568	716	857	773	773
CP039993_1563690_1564051	5.99922	-1.33721	0.699182	-1.91253	0.0558083	0.169067	6	4	5	8	5	3	4	1	2	21	11	7
EA674_13470|hypothetical_protein	1.54728	-3.15327	1.65043	-1.91058	0.056059	NA	1	0	0	0	1	1	2	3	0	3	4	3
CP039993_523004_523204	17.1403	-0.792139	0.414697	-1.91016	0.0561123	0.16989	16	23	14	23	12	7	10	7	11	22	33	42
EA674_17220|hypothetical_protein	365.64	0.198865	0.104183	1.90881	0.0562864	0.170319	490	424	373	435	280	363	314	236	413	397	354	417
EA674_03960|hypothetical_protein	136.675	-0.29245	0.153261	-1.90818	0.0563679	0.170419	178	124	126	195	101	138	90	88	127	177	173	193
CP039993_3255029_3255329	45.6122	-0.511013	0.26782	-1.90805	0.0563854	0.170419	58	33	43	69	34	48	20	27	47	77	60	60
EA674_12180|phenylacetate-CoA_oxygenase_subunit_PaaC	1817.91	-0.158051	0.0828447	-1.9078	0.056417	0.170419	2544	1752	1791	2487	864	2092	1237	1414	1684	2278	2343	2400
EA674_12725|HAD-IIIA_family_hydrolase	185.789	0.269177	0.141156	1.90695	0.0565271	0.170654	255	190	210	260	121	175	157	147	208	208	180	177
EA674_07380|transcriptional_regulator	106.35	-0.393397	0.206341	-1.90653	0.0565809	0.170668	153	89	81	162	45	115	58	82	136	160	132	141
CP039993_986077_986374	72.4408	0.406243	0.213093	1.90641	0.0565966	0.170668	98	96	69	100	55	69	66	47	84	48	79	80
EA674_13640|hypothetical_protein	10.9069	-0.942814	0.494806	-1.90542	0.0567253	0.170877	9	12	11	10	6	2	6	8	9	18	25	22
EA674_09605|indoleacetamide_hydrolase	9.82928	-1.01467	0.53258	-1.9052	0.0567544	0.170877	6	13	8	8	4	12	2	6	9	15	23	20
CP039993_307445_307505	16.2277	0.783935	0.411487	1.90513	0.0567636	0.170877	24	24	18	17	16	14	13	7	25	12	13	15
CP039993_1419118_1420120	5.59936	-1.22551	0.643431	-1.90465	0.0568255	0.170965	6	5	5	5	2	4	3	1	4	12	13	14
EA674_15390|HAMP_domain-containing_protein	415.89	-0.209501	0.110067	-1.9034	0.0569885	0.171357	516	445	347	535	244	489	318	284	446	466	526	579
CP039993_3740543_3741452	222.223	0.330274	0.173683	1.90159	0.0572252	0.17197	226	278	227	358	195	234	221	128	224	227	191	196
EA674_01950|ABC_transporter_substrate-binding_protein	842.738	0.160836	0.0845995	1.90115	0.0572825	0.172044	1251	841	885	1207	537	851	692	600	867	913	883	958
EA674_04235|ABC_transporter_permease	16.6094	-0.804721	0.423395	-1.90064	0.0573493	0.172146	19	13	10	21	10	26	10	9	17	18	21	37
EA674_01730|superoxide_dismutase_family_protein	565.401	-0.192087	0.101136	-1.89929	0.0575264	0.172579	683	543	587	665	345	566	501	382	578	646	720	801
CP039993_2404970_2405058	2.55028	-2.59826	1.36834	-1.89884	0.057586	0.172659	0	2	0	1	5	1	4	1	2	4	1	8
EA674_16940|DUF1345_domain-containing_protein	11.4319	-1.00385	0.529326	-1.89648	0.0578969	0.173444	9	13	8	14	11	12	3	1	12	21	25	17
EA674_00860|16S_rRNA_(uracil(1498)-N(3))-methyltransferase	29.3314	0.585818	0.308919	1.89635	0.0579138	0.173444	42	49	35	37	25	21	18	19	28	29	28	31
CP039993_2131058_2131556	103.239	-0.363262	0.191808	-1.89388	0.0582404	0.174241	166	93	87	156	51	88	83	64	77	129	146	181
EA674_17915|TetR_family_transcriptional_regulator	26.1231	0.653895	0.345275	1.89384	0.0582463	0.174241	30	42	36	36	18	15	26	15	30	17	27	29
EA674_06040|hypothetical_protein	8.72526	1.09477	0.578598	1.89211	0.0584758	0.174828	19	16	7	11	6	7	11	5	6	9	7	4
CP039993_3262636_3262775	13.164	-0.875522	0.462963	-1.89113	0.0586073	0.175121	19	10	7	12	4	13	10	14	10	20	27	20
CP039993_3014130_3014331	73.8117	-0.393471	0.208094	-1.89083	0.0586473	0.175141	99	63	71	86	49	63	61	30	92	115	83	119
EA674_02330|PhoH_family_protein	1289.32	-0.13586	0.0719055	-1.88942	0.0588357	0.175604	1647	1396	1209	1655	789	1306	1017	888	1307	1628	1553	1677
EA674_05795|hypothetical_protein	5.46537	-1.54124	0.816046	-1.88866	0.0589368	0.175806	6	0	5	2	0	5	4	7	7	11	7	15
CP039993_805915_805970	9.01094	-1.10201	0.583861	-1.88745	0.0591	0.176193	10	6	9	7	3	11	3	3	10	26	7	23
EA674_03025|DUF934_domain-containing_protein	180.578	0.268296	0.142219	1.88651	0.0592267	0.17647	301	208	185	237	116	173	119	116	217	183	201	210
EA674_12370|hypothetical_protein	12.4709	-0.837367	0.444095	-1.88556	0.0593547	0.176751	15	17	12	8	2	10	6	3	10	33	24	25
EA674_14445|hypothetical_protein	131.223	-0.333884	0.177198	-1.88425	0.0595313	0.177176	192	136	137	134	81	114	68	74	123	251	156	199
EA674_12330|DotU_family_type_IV/VI_secretion_system_protein	15.1779	-0.778423	0.413266	-1.88359	0.0596205	0.177342	16	14	14	20	8	15	8	5	17	23	24	32
EA674_03645|DUF3298_domain-containing_protein	65.4335	-0.424008	0.225208	-1.88274	0.0597363	0.177585	94	52	58	65	28	64	57	51	71	82	89	111
EA674_16170|tRNA_dihydrouridine(20/20a)_synthase_DusA	228.282	0.230494	0.122488	1.88177	0.0598675	0.177801	351	245	252	267	141	235	199	157	237	250	231	268
EA674_02415|DUF4256_domain-containing_protein	17.93	-0.750248	0.398707	-1.8817	0.0598764	0.177801	22	18	7	20	10	12	20	12	22	23	28	30
CP039993_1569141_1569765	4.16314	-1.61623	0.860297	-1.87869	0.0602871	0.178919	4	2	2	6	6	3	2	1	1	9	10	6
CP039993_2485902_2485965	1.59244	3.07424	1.63647	1.87858	0.0603019	NA	5	2	2	6	0	0	1	2	2	0	1	0
EA674_01180|hypothetical_protein	21.6775	-0.693618	0.369537	-1.87699	0.060519	0.179438	35	18	10	33	6	23	18	18	15	30	35	38
CP039993_764780_765734	1572.57	0.175155	0.0933207	1.87691	0.0605304	0.179438	2223	1705	1695	2013	1054	1628	1231	1192	1527	1964	1537	1667
CP039993_1798567_1798994	227.908	0.749147	0.399244	1.87641	0.0605986	0.179539	765	221	177	214	151	195	159	165	201	197	247	222
EA674_15275|hypothetical_protein	36.9479	-0.533005	0.284108	-1.87606	0.0606469	0.179581	44	29	36	49	17	35	40	24	26	57	47	60
CP039993_121803_121862	55.5224	-0.44516	0.237334	-1.87567	0.0607007	0.179638	52	48	57	73	28	79	41	42	47	62	80	83
CP039993_1794658_1794733	46.0818	0.550456	0.29362	1.87472	0.0608309	0.179922	124	46	34	52	35	36	37	29	51	47	43	48
EA674_07560|Lrp/AsnC_family_transcriptional_regulator	8.14139	1.16772	0.623067	1.87414	0.0609106	0.17998	17	9	9	10	9	7	4	9	8	6	2	8
EA674_14360|homocysteine_S-methyltransferase_family_protein	5.80102	1.43024	0.763166	1.87408	0.0609188	0.17998	7	13	8	8	6	8	6	2	1	3	6	2
EA674_19130|lytic_murein_transglycosylase	176.767	-0.263613	0.140703	-1.87354	0.0609932	0.18002	235	168	161	187	105	174	154	127	185	204	249	248
EA674_01720|MFS_transporter	75.1505	0.39053	0.208482	1.8732	0.0610403	0.18002	91	101	88	81	70	62	62	35	103	67	72	86
EA674_00165|TetR/AcrR_family_transcriptional_regulator	29.865	0.615023	0.328328	1.8732	0.0610411	0.18002	57	36	23	33	25	36	26	22	31	34	18	25
EA674_18675|DUF1003_domain-containing_protein	12.789	-0.833615	0.445072	-1.87299	0.0610698	0.18002	17	9	9	18	7	14	8	9	8	18	24	22
EA674_09385|IclR_family_transcriptional_regulator	56.7277	-0.408211	0.21807	-1.87193	0.0612167	0.180301	74	58	58	67	24	69	33	34	45	94	81	87
EA674_07355|glutamine_amidotransferase	38.1256	-0.514243	0.274733	-1.87179	0.0612358	0.180301	56	28	32	59	18	37	28	25	34	44	65	61
EA674_05695|DUF4105_domain-containing_protein	37.3954	-0.501082	0.267766	-1.87134	0.0612973	0.180301	39	49	36	38	22	32	24	16	34	65	62	57
EA674_13445|hypothetical_protein	1.6361	-2.64208	1.41189	-1.87131	0.0613022	NA	1	0	1	1	1	1	1	1	1	3	4	6
EA674_08925|YeeE/YedE_family_protein	6.60284	1.40103	0.748691	1.87131	0.0613023	0.180301	11	11	6	8	4	3	4	8	14	6	0	5
CP039993_1462010_1462165	166.757	0.279338	0.149362	1.87021	0.0614548	0.180648	262	208	155	255	85	161	143	122	169	181	174	176
CP039993_1297987_1298191	3.49131	1.98518	1.06176	1.86972	0.0615229	0.180747	4	7	4	2	6	4	5	2	1	2	1	1
CP039993_3555284_3555455	143.558	-0.327978	0.175641	-1.86732	0.0618567	0.18161	189	127	133	168	85	130	144	102	123	144	224	216
EA674_04035|protease_HtpX	643.976	-0.171587	0.0918998	-1.86711	0.0618857	0.18161	892	641	631	802	375	671	474	424	645	896	807	817
EA674_01205|homoserine_kinase	70.2329	0.4011	0.215001	1.86557	0.0621015	0.182141	126	84	63	100	35	79	41	62	81	66	67	79
EA674_04140|DUF1232_domain-containing_protein	10.9934	-0.980416	0.525631	-1.86522	0.0621507	0.182184	12	14	4	12	5	9	3	9	12	12	29	20
CP039993_279355_279653	130.614	0.400445	0.214767	1.86456	0.0622436	0.182354	166	135	217	174	86	105	95	83	139	176	99	142
EA674_09615|DHA2_family_efflux_MFS_transporter_permease_subunit	1.85145	-2.65627	1.42609	-1.86262	0.0625154	0.183048	1	1	0	1	0	4	2	1	1	2	5	6
CP039993_1247982_1248061	1.70805	-2.72818	1.46517	-1.86202	0.0626003	NA	0	2	0	0	0	2	1	1	2	7	4	3
EA674_16310|oligoribonuclease	166.494	0.266159	0.143009	1.86114	0.0627244	0.183558	209	197	167	202	132	158	144	123	201	158	151	189
EA674_00275|YcgN_family_cysteine_cluster_protein	42.8723	0.498426	0.268457	1.85664	0.0633629	0.185323	76	45	46	72	26	55	34	31	31	39	29	54
CP039993_3612245_3612603	14.2911	0.878315	0.473581	1.85463	0.0636497	0.186058	21	16	19	17	7	22	16	15	8	7	9	16
CP039993_3106240_3106334	38.5108	0.525069	0.283201	1.85405	0.0637322	0.186196	53	54	50	59	17	43	32	20	43	29	36	50
EA674_07105|type_1_glutamine_amidotransferase_domain-containing_protein	6.59828	1.29574	0.699029	1.85363	0.0637921	0.186267	14	13	4	7	6	10	3	4	8	3	2	8
EA674_05730|indole-3-glycerol_phosphate_synthase_TrpC	333.784	0.207856	0.1122	1.85255	0.0639473	0.186617	486	349	322	438	222	351	332	216	372	355	344	335
CP039993_3962880_3963068	3.34826	-1.70363	0.920087	-1.8516	0.0640832	0.186909	1	2	3	4	2	2	2	3	2	5	6	10
CP039993_2945447_2945708	10.0941	1.00837	0.544804	1.85089	0.0641855	0.187104	16	13	10	9	8	14	12	7	12	8	7	5
CP039993_1650283_1650351	1.04081	-3.38787	1.83653	-1.84471	0.0650794	NA	0	0	0	0	0	1	2	2	1	2	3	1
EA674_17840|riboflavin_synthase	183.326	0.254164	0.137866	1.84355	0.0652482	0.190096	249	207	192	265	109	197	161	121	211	202	176	187
EA674_11115|type_1_fimbrial_protein	0.93862	-3.60173	1.95391	-1.84334	0.0652794	NA	0	0	0	2	0	0	3	0	0	2	3	2
CP039993_1630762_1630983	3.44608	-1.88835	1.02471	-1.84282	0.0653555	0.190303	1	0	4	3	1	5	6	1	2	8	3	9
EA674_04850|hypothetical_protein	3.49134	1.7005	0.924023	1.84032	0.0657211	0.191109	9	8	5	4	2	2	0	4	3	4	0	3
EA674_12830|LexA_family_transcriptional_regulator	29.4137	0.576093	0.31306	1.8402	0.0657385	0.191109	51	27	28	49	19	35	24	26	32	22	22	29
CP039993_1745554_1745908	15.4443	-0.827175	0.449507	-1.84018	0.0657413	0.191109	25	8	8	20	10	10	20	9	11	21	28	24
CP039993_2428012_2428117	18374.5	-0.540068	0.293581	-1.83959	0.0658287	0.191257	19775	18424	18992	19180	7592	16787	18727	5812	20557	24856	29768	33347
EA674_13560|glutamate_5-kinase	1.50102	-2.9413	1.59974	-1.83862	0.0659715	NA	2	0	0	0	0	3	0	0	1	6	2	7
EA674_05635|acinetobactin_biosynthesis_bifunctional_isochorismatase/aryl_carrier_protein_BasF	1.20659	3.33235	1.81449	1.83652	0.0662806	NA	0	3	2	1	3	2	1	0	1	0	0	0
EA674_08890|protocatechuate_3,4-dioxygenase_subunit_beta	28.9079	0.566415	0.308659	1.83508	0.0664933	0.193081	48	41	31	48	18	32	16	16	32	28	26	30
CP039993_2038042_2038622	21.7131	-0.71181	0.388166	-1.83378	0.0666868	0.193535	22	19	15	13	18	29	23	13	17	38	27	30
EA674_14550|transcriptional_regulator	8.6729	-0.993139	0.541928	-1.8326	0.0668614	0.193935	10	7	8	12	6	7	3	3	5	15	13	24
EA674_19040|NAD(P)H-dependent_oxidoreductase	128.693	-0.290998	0.158907	-1.83125	0.0670629	0.194333	192	114	144	145	69	117	81	88	109	183	166	222
CP039993_3395367_3395489	170.908	0.276357	0.150917	1.83119	0.0670727	0.194333	202	207	167	194	132	199	161	128	186	160	158	180
EA674_01715|hypothetical_protein	15.9141	-0.773194	0.422644	-1.82942	0.0673365	0.19499	13	21	9	21	8	15	6	18	11	26	24	27
EA674_13730|hypothetical_protein	136.351	-0.282434	0.154435	-1.82882	0.0674268	0.195144	174	134	134	182	82	131	111	75	133	174	208	176
CP039993_1768646_1768861	133.287	-0.332976	0.18217	-1.82783	0.0675757	0.195467	156	141	95	146	100	128	146	84	129	127	198	187
EA674_03440|AraC_family_transcriptional_regulator	40.3613	-0.497732	0.272374	-1.82738	0.0676425	0.195552	43	48	29	49	17	43	34	25	45	57	48	72
EA674_02840|hypothetical_protein	10.1762	0.96898	0.530412	1.82684	0.0677231	0.195678	15	13	15	16	3	13	12	8	8	9	7	7
CP039993_1394833_1395119	2.69799	-1.81494	0.993853	-1.82616	0.0678255	0.195866	2	3	1	0	2	1	0	1	3	7	7	8
EA674_02630|hypothetical_protein	223.451	0.230235	0.126173	1.82475	0.0680381	0.196372	320	251	205	298	170	246	192	160	223	237	213	234
CP039993_3473079_3473227	19.8479	0.823853	0.451636	1.82415	0.068129	0.196526	38	16	10	27	11	28	17	33	21	15	12	9
EA674_17660|hydroxymethylbilane_synthase	102.278	0.332965	0.182598	1.82349	0.0682296	0.196617	189	127	97	164	54	107	71	71	82	124	113	98
CP039993_3517831_3517908	22.054	0.657591	0.36063	1.82345	0.0682354	0.196617	37	25	25	34	14	39	9	19	16	16	22	19
CP039993_3720282_3720593	43.7247	-0.54625	0.299725	-1.82251	0.0683779	0.196919	46	42	33	49	29	49	48	26	35	32	69	84
CP039993_1274695_1274840	131.395	0.320542	0.176165	1.81955	0.0688273	0.198105	157	125	156	190	108	151	111	103	128	139	97	132
EA674_07280|hypothetical_protein	180.168	-0.28427	0.156272	-1.81907	0.0689002	0.198206	201	190	174	206	121	173	165	106	178	177	271	274
EA674_18950|bifunctional_3-demethylubiquinone_3-O-methyltransferase/2-octaprenyl-6-hydroxy_phenol_methylase	193.428	0.254996	0.140333	1.81708	0.0692056	0.198887	298	217	212	292	116	184	138	131	207	234	179	218
EA674_17295|ribosome_maturation_factor_RimP	871.842	0.25063	0.137934	1.81703	0.0692128	0.198887	887	1078	990	985	818	784	919	480	933	918	824	901
EA674_00570|hypothetical_protein	111.447	-0.301017	0.16569	-1.81675	0.0692553	0.198901	150	108	115	134	51	111	66	91	103	144	152	182
CP039993_3123963_3124195	72.8269	-0.355134	0.195532	-1.81624	0.0693333	0.198915	92	76	69	69	48	64	61	49	62	109	99	107
CP039993_2009504_2009596	3.78674	-1.53493	0.845122	-1.81622	0.0693362	0.198915	1	4	4	4	1	2	2	2	1	15	6	7
EA674_03265|YdcF_family_protein	25.9878	0.582407	0.320837	1.81528	0.0694815	0.199223	41	31	29	37	19	29	23	19	22	21	23	26
CP039993_2310185_2310347	13.4808	0.849304	0.467976	1.81484	0.0695478	0.199305	32	23	14	11	7	15	6	7	18	9	20	10
CP039993_401015_401188	76.8613	0.369349	0.203602	1.81408	0.0696659	0.199436	106	83	77	114	51	80	64	65	90	78	79	56
EA674_05280|protease_SohB	324.895	-0.204501	0.112731	-1.81405	0.0696696	0.199436	440	357	268	418	197	330	245	204	351	386	425	458
EA674_15140|sulfite_exporter_TauE/SafE_family_protein	30.7678	0.552769	0.304994	1.81239	0.0699253	0.200059	48	45	29	42	14	40	19	27	34	29	32	25
CP039993_2033334_2034146	69.2388	1.41077	0.778857	1.81133	0.0700901	0.200421	283	52	57	272	30	33	33	25	35	44	41	55
EA674_13645|hypothetical_protein	14.2226	-0.800503	0.442616	-1.80857	0.0705175	0.201476	18	10	12	18	9	16	9	8	9	30	13	29
CP039993_522722_522889	249.547	0.224316	0.124044	1.80836	0.0705501	0.201476	330	287	264	325	193	233	217	164	268	285	255	245
CP039993_2605266_2605360	41.3509	-0.522283	0.288849	-1.80815	0.0705831	0.201476	58	26	44	52	18	40	43	21	33	62	75	52
EA674_03660|tRNA_(cytidine(34)-2'-O)-methyltransferase	64.1717	0.400169	0.221363	1.80775	0.070646	0.201476	83	69	61	87	54	82	62	35	83	50	53	65
EA674_02430|DUF1446_domain-containing_protein	22.3088	-0.644488	0.356521	-1.80771	0.070651	0.201476	35	19	14	25	12	19	11	13	30	41	32	35
EA674_00440|UDP-N-acetylglucosamine_diphosphorylase/glucosamine-1-phosphate_N-acetyltransferase	833.037	0.157899	0.0873729	1.80719	0.0707325	0.201599	1092	969	859	1049	555	861	667	590	922	958	835	937
CP039993_3090542_3090638	1285.87	0.157688	0.0873351	1.80555	0.0709884	0.202219	1570	1419	1427	1595	888	1345	1094	846	1494	1353	1354	1451
EA674_05225|DUF541_domain-containing_protein	70.7658	-0.373032	0.20666	-1.80505	0.0710671	0.202269	82	78	71	83	35	71	58	31	75	108	92	113
CP039993_2697460_2697620	11.1662	-0.957331	0.530393	-1.80495	0.071083	0.202269	10	4	7	19	7	20	9	7	14	17	11	14
CP039993_2719633_2720157	2.19996	4.18431	2.31899	1.80437	0.0711737	0.202417	1	4	4	5	0	0	0	5	7	0	0	0
EA674_14545|DNA-binding_protein	10.3033	-0.960986	0.532809	-1.80362	0.0712908	0.20264	12	8	10	7	8	10	8	5	1	15	20	26
EA674_10045|LysR_family_transcriptional_regulator	110.145	0.321454	0.178632	1.79953	0.0719346	0.20436	150	120	119	129	77	148	86	96	96	104	110	110
EA674_01680|EamA_family_transporter	91.8574	-0.332584	0.184844	-1.79927	0.0719752	0.204365	112	80	92	108	60	71	74	71	98	135	107	130
EA674_16030|threonine--tRNA_ligase	3594.96	0.134111	0.0745487	1.79898	0.0720226	0.204388	4675	4001	3791	4477	2638	3469	3157	2396	3785	4147	3802	3905
EA674_05970|hypothetical_protein	1.56642	-2.6614	1.47958	-1.79876	0.0720568	NA	1	0	1	2	1	0	0	2	0	5	5	3
CP039993_3494166_3494900	36.4457	-0.482152	0.268195	-1.79777	0.072214	0.204821	44	29	41	43	23	35	27	21	29	56	53	57
EA674_12005|4-hydroxybenzoate_3-monooxygenase	12.3058	-0.859247	0.478051	-1.79739	0.072273	0.204877	12	15	5	22	2	14	6	13	9	18	24	18
CP039993_2284967_2285385	32.8113	0.593587	0.330408	1.79653	0.0724109	0.205158	67	57	60	38	10	19	9	7	38	34	45	49
CP039993_2961365_2961488	1.32366	-2.997	1.66886	-1.79583	0.0725209	NA	1	0	0	1	2	1	1	1	0	1	5	3
EA674_01110|TetR/AcrR_family_transcriptional_regulator	0.782293	-3.59017	2.00002	-1.79507	0.0726431	NA	0	0	0	2	0	0	0	0	2	2	2	3
CP039993_384686_384834	5.59248	1.21019	0.674588	1.79397	0.0728188	0.206202	12	9	10	9	3	3	3	4	4	3	5	6
EA674_03920|hypothetical_protein	34.1949	0.609027	0.339579	1.79348	0.0728968	0.206312	29	46	38	47	28	31	41	36	28	19	31	29
EA674_05135|L-cystine_transporter	345.52	0.208993	0.116659	1.79149	0.0732145	0.207099	468	402	359	447	238	337	292	263	342	419	325	362
CP039993_277804_278077	25.7915	-0.569973	0.318238	-1.79103	0.073289	0.207198	36	22	25	29	16	24	18	14	16	51	38	38
EA674_11585|GNAT_family_N-acetyltransferase	8.11477	1.07367	0.599573	1.79072	0.073338	0.207225	12	12	12	11	2	8	8	4	15	5	6	7
EA674_10290|O-succinylhomoserine_sulfhydrylase	215.814	0.246121	0.137504	1.78992	0.0734666	0.207477	345	219	188	303	139	250	204	152	226	218	223	208
CP039993_1346216_1346417	33.5209	0.561497	0.313884	1.78887	0.0736363	0.207804	52	41	46	60	24	35	16	18	33	27	24	48
EA674_09485|NAD(P)-dependent_alcohol_dehydrogenase	34.9183	0.505343	0.282518	1.78871	0.0736615	0.207804	67	39	34	57	19	40	24	24	37	34	30	37
EA674_12675|O-methyltransferase	78.9869	0.378375	0.211594	1.78821	0.0737425	0.207921	128	74	101	128	43	68	65	65	72	79	91	71
EA674_11095|tRNA_epoxyqueuosine(34)_reductase_QueG	39.212	0.470498	0.263293	1.78698	0.0739414	0.208204	71	46	42	49	28	44	33	24	33	41	39	38
EA674_09505|GNAT_family_N-acetyltransferase	4.50565	1.46428	0.819428	1.78695	0.0739451	0.208204	12	7	10	1	2	9	1	1	4	3	2	6
EA674_02195|succinate_dehydrogenase_assembly_factor_2	76.3718	0.369289	0.206674	1.78682	0.0739668	0.208204	137	74	77	109	59	81	68	44	73	77	79	72
EA674_11080|helix-turn-helix_domain-containing_protein	29.4815	-0.579419	0.324313	-1.7866	0.0740015	0.208204	27	33	22	43	22	25	26	17	24	29	42	58
CP039993_1731421_1731825	1.28094	3.06165	1.71478	1.78545	0.0741887	NA	5	3	1	6	0	1	0	1	0	0	1	0
EA674_15345|NADH-quinone_oxidoreductase_subunit_NuoH	2394.31	0.142886	0.0800747	1.78441	0.0743571	0.209092	3194	2397	2581	3240	1544	2763	2057	1731	2368	2591	2561	2552
EA674_04705|hypothetical_protein	1.86081	-2.85215	1.59947	-1.78319	0.0745561	0.209539	1	0	0	3	3	1	3	0	3	4	4	0
EA674_13775|hypothetical_protein	6.65457	-1.19849	0.672663	-1.7817	0.074798	0.210107	5	3	7	8	6	6	2	4	6	9	20	7
EA674_19190|guanine_deaminase	171.465	0.253068	0.142165	1.7801	0.0750598	0.210729	257	185	149	231	120	203	144	115	207	167	162	182
EA674_03110|TonB-dependent_receptor	202.552	-0.238678	0.134148	-1.77921	0.0752053	0.211005	258	198	198	249	102	206	151	168	197	268	237	298
CP039993_952913_953176	3.71005	-1.54967	0.871083	-1.77901	0.0752382	0.211005	3	3	1	4	1	4	3	3	4	9	7	5
EA674_10760|orotidine-5'-phosphate_decarboxylase	265.313	0.210559	0.118393	1.77848	0.0753257	0.211137	368	281	259	382	191	273	235	199	266	249	251	315
EA674_18965|hypothetical_protein	73.1894	-0.349512	0.196669	-1.77716	0.0755425	0.211547	93	70	59	92	43	73	55	52	86	90	90	113
CP039993_3359290_3359397	9.24371	-1.0544	0.593332	-1.77709	0.0755539	0.211547	8	2	14	10	2	3	10	7	8	16	17	20
EA674_09900|bifunctional_metallophosphatase/5'-nucleotidase	3.99291	-1.74741	0.983433	-1.77685	0.0755927	0.211547	0	3	3	2	0	1	7	5	5	5	10	7
EA674_08450|hypothetical_protein	31.4098	0.562475	0.316648	1.77634	0.0756768	0.211669	59	43	28	56	12	31	17	27	37	27	37	26
EA674_05925|hypothetical_protein	11.1782	0.887565	0.499857	1.77564	0.0757928	0.211881	27	15	14	15	6	14	6	9	5	4	15	12
EA674_00700|DUF2147_domain-containing_protein	2001.77	-0.186743	0.105217	-1.77484	0.0759248	0.212137	2819	1931	1717	2781	1017	2048	1383	1763	2047	2179	2537	2864
CP039993_3867009_3867167	14.1793	-0.837822	0.472144	-1.7745	0.0759797	0.212177	23	15	4	18	8	10	10	4	17	32	26	17
EA674_01485|PilN_domain-containing_protein	7.2916	-1.22549	0.690934	-1.77368	0.0761167	0.212447	4	7	4	13	3	0	5	9	9	12	12	13
CP039993_535430_535491	1.36162	2.97251	1.67634	1.77322	0.0761924	NA	2	5	1	4	1	0	1	1	1	1	0	0
CP039993_3449247_3449359	23.0605	0.622781	0.351244	1.77308	0.0762162	0.212612	36	35	25	39	7	32	17	14	24	18	21	26
EA674_00595|LysM_peptidoglycan-binding_domain-containing_protein	1.00008	-3.28455	1.85272	-1.77283	0.0762575	NA	1	0	0	0	0	2	0	0	0	2	5	4
EA674_06730|BLUF_domain-containing_protein	12.8242	-0.92899	0.52405	-1.77271	0.0762765	0.212667	9	17	6	6	5	20	9	9	15	15	28	21
CP039993_2082764_2083282	9.67448	-0.968574	0.546465	-1.77243	0.0763225	0.212682	11	6	9	16	2	3	8	8	9	15	15	23
CP039993_1347697_1347930	86.9053	0.33331	0.188207	1.77097	0.0765649	0.213244	132	95	89	127	66	97	69	64	75	84	73	103
CP039993_2658225_2658391	6.61626	-1.10343	0.623569	-1.76954	0.0768046	0.213799	6	7	4	11	2	9	2	3	5	10	16	12
EA674_12745|hypothetical_protein	347.359	-0.432883	0.244868	-1.76782	0.0770915	0.214484	283	350	379	298	265	277	370	177	382	367	474	634
EA674_08745|M48_family_metallopeptidase	117.73	0.295214	0.167064	1.76707	0.0772163	0.214717	147	137	135	139	93	106	112	73	138	116	134	107
CP039993_66725_66779	10.6226	-1.06404	0.60229	-1.76666	0.0772851	0.214769	12	12	3	11	2	16	9	11	1	30	18	9
CP039993_1222422_1222638	2.35828	2.84776	1.61212	1.76647	0.0773168	0.214769	3	1	0	8	3	6	1	3	3	0	0	0
CP039993_577750_578039	159.393	-0.251216	0.142299	-1.76541	0.0774941	0.215148	207	156	152	246	73	186	98	126	135	235	199	201
EA674_10430|nicotinate-nucleotide--dimethylbenzimidazole_phosphoribosyltransferase	55.3536	0.400033	0.226626	1.76517	0.0775353	0.215148	97	69	59	70	42	50	41	26	64	62	49	65
CP039993_2504789_2504866	68.624	0.490346	0.277839	1.76486	0.0775876	0.21518	61	86	57	87	62	95	94	25	102	49	38	67
CP039993_3716056_3716148	111.417	0.295299	0.167345	1.76461	0.0776288	0.21518	153	143	118	143	69	138	71	93	100	107	117	128
CP039993_3790254_3790331	2465.03	0.158038	0.0895951	1.76392	0.0777463	0.215392	3068	2716	2541	3276	1843	2546	2050	1853	2529	2843	2478	2469
EA674_09595|hypothetical_protein	0.953278	-3.56649	2.02409	-1.76203	0.0780647	NA	0	0	0	0	1	0	1	2	0	2	0	5
CP039993_2410836_2410924	0.805639	3.4875	1.98186	1.75971	0.0784568	NA	2	4	0	1	0	1	1	1	0	0	0	0
EA674_00180|hypothetical_protein	43.2177	0.463085	0.263745	1.75581	0.0791212	0.219086	60	46	65	55	29	46	38	24	41	50	42	38
EA674_01430|sulfate_ABC_transporter_substrate-binding_protein	3.16755	-1.77321	1.01108	-1.75378	0.0794687	0.219932	5	0	2	0	0	2	2	4	2	5	8	11
EA674_09625|GH3_auxin-responsive_promoter_family_protein	2.90249	-1.96017	1.11855	-1.75242	0.0797017	0.22043	4	1	0	4	1	0	0	3	6	5	9	5
EA674_00375|acyltransferase	5.59131	-1.26196	0.720198	-1.75224	0.0797327	0.22043	1	6	6	6	2	2	3	6	4	11	9	14
CP039993_683427_683505	3.25373	-1.61865	0.926241	-1.74755	0.0805422	0.222551	4	2	1	3	1	3	1	2	4	7	3	12
CP039993_857676_857765	1.34774	-3.11856	1.78472	-1.74737	0.0805733	NA	0	0	0	5	1	1	1	3	0	0	4	1
EA674_06555|ATP-dependent_RNA_helicase_RhlB	798.595	0.162611	0.09312	1.74625	0.0807669	0.223054	989	860	838	995	655	756	790	475	894	828	778	907
EA674_07700|DUF551_domain-containing_protein	18.5066	-0.708956	0.406115	-1.7457	0.0808629	0.223202	19	28	12	13	11	12	15	11	11	42	20	39
EA674_13450|hypothetical_protein	17.2174	-0.761648	0.436605	-1.74448	0.0810758	0.223654	9	19	22	14	13	17	14	3	13	25	28	39
EA674_19630|signal_peptidase_I	1.93735	2.93429	1.68225	1.74427	0.0811119	0.223654	1	2	1	8	2	7	2	0	1	0	0	0
EA674_18170|TerC_family_protein	353.043	-0.177796	0.102011	-1.74291	0.081349	0.22419	467	373	345	444	213	358	243	237	353	470	428	495
EA674_10030|short-chain_fatty_acid_transporter	623.896	-0.176201	0.101471	-1.73646	0.0824826	0.227195	892	592	553	872	313	707	421	526	589	732	850	784
CP039993_3767670_3767837	49.2858	0.420028	0.242008	1.73559	0.0826358	0.227498	74	60	53	54	37	50	51	32	47	41	57	47
EA674_14870|tartrate_dehydrogenase	15.434	-0.770549	0.44425	-1.7345	0.0828301	0.227913	23	10	6	21	7	19	15	7	22	21	23	23
CP039993_1127987_1128153	102.735	-0.334264	0.192787	-1.73385	0.082944	0.228097	134	97	90	155	37	97	76	98	92	152	111	156
EA674_11905|acyl-CoA_dehydrogenase	7.73119	-1.14995	0.66332	-1.73363	0.082984	0.228097	7	7	3	20	4	3	1	6	11	10	14	15
EA674_00245|hypothetical_protein	40.2554	0.481297	0.277751	1.73283	0.0831253	0.228366	49	55	44	69	23	46	29	30	44	48	29	34
CP039995_3771_4020	53.9236	-0.402037	0.232135	-1.73191	0.0832895	0.228698	69	51	43	96	26	64	39	37	38	80	76	66
EA674_19290|hypothetical_protein	1.83859	2.96369	1.71328	1.72984	0.0836595	0.229432	1	0	3	5	1	5	4	0	3	0	0	0
EA674_10670|ABC_transporter_ATP-binding_protein	48.9347	-0.455233	0.263184	-1.72972	0.0836807	0.229432	83	32	42	66	18	49	33	35	51	81	72	65
EA674_07630|iron-containing_alcohol_dehydrogenase	53.4416	-0.386725	0.223582	-1.72968	0.0836881	0.229432	64	52	53	58	38	42	37	38	52	79	75	76
EA674_08965|SDR_family_oxidoreductase	15.8924	-0.733218	0.424148	-1.72868	0.0838661	0.2298	17	15	15	18	6	15	7	12	16	39	25	17
EA674_00950|NTPase	3.66102	-1.62101	0.938222	-1.72775	0.0840331	0.230138	7	1	0	7	3	3	0	2	2	5	7	12
EA674_06030|hypothetical_protein	1.30596	-2.72943	1.58109	-1.7263	0.0842942	NA	2	0	0	1	1	1	0	0	0	2	5	6
EA674_17665|response_regulator_transcription_factor	39.1034	-0.457971	0.265488	-1.72502	0.0845244	0.231269	45	45	42	41	12	38	27	20	41	61	64	65
EA674_00885|winged_helix-turn-helix_transcriptional_regulator	5.72918	1.27496	0.739125	1.72496	0.0845341	0.231269	8	6	9	8	5	11	5	4	3	3	3	4
EA674_08330|hypothetical_protein	3.4183	-1.62179	0.940558	-1.72428	0.0846567	0.231483	1	5	1	2	2	2	1	1	6	3	11	9
CP039993_2353957_2354134	1.1865	-3.11872	1.81029	-1.72278	0.0849287	NA	0	0	0	4	1	2	0	1	2	0	4	1
EA674_16495|tail-specific_protease	432.834	-0.164449	0.0955341	-1.72136	0.0851854	0.232787	602	440	419	584	256	428	295	296	426	528	553	616
EA674_10560|poly(hydroxyalcanoate)_granule_associated_protein	147.513	-0.284113	0.165071	-1.72116	0.0852223	0.232787	173	162	110	170	105	154	120	120	139	150	204	209
CP039993_3775285_3775354	10.8948	0.906801	0.527242	1.71989	0.0854515	0.233292	19	15	8	14	9	14	5	11	15	7	7	9
EA714_003840|CapA_family_protein	8.28998	-1.05008	0.610889	-1.71894	0.0856248	0.233644	10	5	6	5	1	8	13	5	7	11	12	22
CP039993_582422_582535	62.1085	-0.404349	0.235345	-1.71811	0.0857763	0.233934	48	75	56	73	51	45	55	39	67	86	79	86
EA674_07565|leucine_efflux_protein_LeuE	27.9777	0.592159	0.344705	1.71787	0.0858205	0.233934	49	35	30	27	13	21	21	33	36	29	21	28
CP039993_3059071_3059135	11.9218	0.897232	0.522527	1.7171	0.0859608	0.234195	14	22	7	20	8	18	8	10	15	10	8	6
EA674_03055|hypothetical_protein	41.1035	-0.478688	0.278855	-1.71662	0.0860479	0.234311	45	28	38	56	33	42	31	22	54	61	59	40
EA674_07760|hypothetical_protein	5.4238	-1.17297	0.683891	-1.71514	0.0863188	0.234927	8	4	4	2	1	3	4	5	2	12	10	15
CP039993_2126674_2126851	1.33214	2.9304	1.70979	1.71389	0.0865488	NA	4	1	3	6	0	0	1	1	1	0	0	1
EA674_11940|nitronate_monooxygenase	19.1307	-0.725868	0.424073	-1.71166	0.0869594	0.236384	20	24	9	20	5	29	22	10	13	27	28	36
CP039993_3691534_3691813	206.413	0.239724	0.140064	1.71153	0.086984	0.236384	314	223	206	299	123	225	162	184	173	172	237	242
EA674_13070|M48_family_metallopeptidase	285.996	-0.207887	0.121465	-1.7115	0.0869893	0.236384	440	263	275	374	143	316	189	205	254	401	342	419
CP039993_1747351_1747405	1.23723	-3.01756	1.76321	-1.71141	0.0870061	NA	0	0	1	5	0	0	1	0	1	4	4	1
EA674_04160|DNA_repair_protein_RadA	105.316	0.315821	0.184624	1.71062	0.0871519	0.236703	141	133	117	139	68	120	73	82	102	91	90	149
CP039993_1912689_1912970	5.97803	1.27782	0.747135	1.71029	0.0872115	0.236743	13	5	8	16	6	2	4	4	6	3	3	5
CP039993_943436_943527	5.77476	1.32256	0.775078	1.70636	0.0879405	0.238598	13	8	6	11	2	3	5	3	12	7	0	4
CP039993_2637062_2637446	80.1434	-0.413615	0.242507	-1.70558	0.0880863	0.238871	57	81	87	76	67	62	105	37	77	88	119	114
CP039993_2621108_2621452	4.45121	1.39179	0.81685	1.70385	0.0884092	0.239622	10	10	3	6	3	1	6	1	7	2	3	4
CP039993_2639046_2639195	19.6092	0.63847	0.374877	1.70315	0.0885408	0.239855	35	30	22	31	7	29	7	13	20	15	20	23
EA674_17520|DUF4442_domain-containing_protein	18.4356	-0.645033	0.378963	-1.7021	0.0887362	0.24026	18	26	19	29	5	15	7	11	7	26	43	35
EA674_08220|multidrug_efflux_transcriptional_repressor_AdeN	49.1941	0.422864	0.248728	1.70011	0.0891108	0.241062	65	65	52	49	42	54	50	28	51	49	38	55
EA674_03615|recombinase	107.012	-0.30401	0.178826	-1.70004	0.0891241	0.241062	134	126	92	116	57	92	103	73	91	147	162	142
EA674_03980|phosphoenolpyruvate_carboxykinase_(GTP)	4872.19	0.127389	0.0749679	1.69925	0.089272	0.241338	6593	5198	5001	5968	3723	4821	4415	3131	5098	5625	4929	5426
CP039993_3602733_3602791	7.6752	-0.989378	0.582399	-1.6988	0.0893574	0.241444	9	8	4	12	4	3	3	6	7	14	13	16
EA674_12340|type_VI_secretion_system_protein_TssA	11.8718	-0.843574	0.496668	-1.69847	0.0894198	0.241489	12	15	8	10	8	5	6	8	12	21	32	12
EA674_01125|hypothetical_protein	9.41045	-0.928112	0.546766	-1.69746	0.0896104	0.24169	17	8	4	6	5	7	3	7	9	22	21	12
EA674_17730|tRNA_glutamyl-Q(34)_synthetase_GluQRS	196.52	0.230578	0.135849	1.69732	0.0896362	0.24169	276	227	206	264	127	214	135	151	209	235	198	194
EA674_10895|phosphotransferase	199.177	0.226763	0.133622	1.69705	0.0896875	0.24169	262	234	192	274	153	210	186	128	198	193	201	218
CP039993_3200103_3200327	1.63392	-2.82431	1.66453	-1.69676	0.0897426	NA	0	1	0	2	1	2	0	0	7	1	4	3
EA674_05385|EF-P_beta-lysylation_protein_EpmB	138.378	0.266524	0.157096	1.69657	0.0897785	0.24169	188	157	151	177	92	180	109	95	132	148	125	157
EA674_12210|aldehyde_dehydrogenase_(NADP(+))	4.78725	-1.34047	0.790109	-1.69657	0.0897788	0.24169	2	4	4	8	1	3	2	3	8	5	13	9
EA674_08505|DNA-binding_protein	7.12813	-1.0766	0.634718	-1.69619	0.0898503	0.24169	5	6	6	6	2	9	5	8	4	6	15	17
EA674_06870|aspartate/glutamate_racemase_family_protein	31.2481	0.504737	0.29758	1.69614	0.0898593	0.24169	41	37	35	45	21	35	27	26	32	32	26	25
EA674_05100|rRNA_large_subunit_pseudouridine_synthase_E	291.647	0.197807	0.116623	1.69612	0.0898625	0.24169	364	346	302	358	223	308	250	182	328	293	300	330
CP039993_759919_759994	125.184	0.303432	0.178938	1.69574	0.0899355	0.241762	186	123	110	174	108	167	91	77	156	113	120	116
EA674_08785|alpha/beta_hydrolase	57.2265	-0.389328	0.229756	-1.69453	0.0901653	0.242182	54	62	50	86	27	64	51	37	58	77	74	77
CP039993_1007628_1007696	1.44682	2.54766	1.50352	1.69446	0.0901775	NA	2	7	2	1	1	0	1	0	2	1	1	0
EA674_12350|PAAR_domain-containing_protein	11.6193	-0.929726	0.548696	-1.69443	0.090184	0.242182	11	17	2	19	10	4	6	5	15	21	17	21
EA674_17450|acetyl-CoA_C-acyltransferase_FadA	1353.97	-0.158783	0.0937579	-1.69354	0.0903527	0.242511	1942	1240	1357	1875	753	1417	1012	883	1340	1863	1643	1717
EA674_17440|lipid_A_hydroxylase_LpxO	391.285	0.171744	0.101496	1.69213	0.0906206	0.243106	558	440	374	539	258	432	307	270	422	438	389	434
EA674_17110|apolipoprotein_N-acyltransferase	166.248	0.229559	0.135731	1.69128	0.0907834	0.243418	249	207	179	221	98	167	125	119	149	201	176	185
[truncated: 3,696 more rows]
