# Supplementary material for: Bacterial Genome Wide Association Studies (bGWAS) and Transcriptomics Identifies Cryptic Antimicrobial Resistance Mechanisms in Acinetobacter baumannii
Source: Front Public Health. 2020 Sep 2;8:451. doi: 10.3389/fpubh.2020.00451 (PMC7493718; doi:10.3389/fpubh.2020.00451)
Supplement: Table S8 — DESeq2 results of Pair 2 RNA-Seq datasets. Biological replicates denoted with (a,b,c). Isolates grown in sub-inhibitory concentrations are labeled as “sub” with the corresponding antimicrobial. [file Table_8.xlsx]

## Sheet: pair2_salmon
Table S8: DESeq2 results of Pair 2 RNA-Seq datasets. Biological replicates denoted with (a,b,c). Isolates grown in sub-inhibitory concentrations are labeled as "sub" with the corresponding antimicrobial.
	baseMean	log2FoldChange	lfcSE	stat	pvalue	padj	TG31302a	TG31302b	TG31302c	TG31986a	TG31986b	TG31986c	TG31986-subFEPa	TG31986-subFEPb	TG31986-subFEPc
EA665_000515|IS66_family_insertion_sequence_hypothetical_protein	755.108	2.19872	0.112864	19.4811	1.58927e-84	6.54939e-81	239	267	217	914	1055	864	1074	1134	970
EA665_006735|IS5_family_transposase	330.436	3.10885	0.166721	18.647	1.33544e-77	2.75168e-74	57	58	54	373	521	359	527	557	448
EA665_012890|poly-beta-1,6_N-acetyl-D-glucosamine_export_porin_PgaA (biofilm)	130.145	-4.31699	0.255228	-16.9143	3.53122e-64	4.85072e-61	355	416	365	14	23	12	21	24	13
CP039343_3704751_3705056	978.699	-1.42435	0.0888416	-16.0325	7.57597e-58	7.80514e-55	1675	1800	1826	561	611	514	694	722	686
EA665_011190|cytochrome_d_ubiquinol_oxidase_subunit_II	2358.73	1.20608	0.0761982	15.8282	1.98848e-56	1.63891e-53	1373	1375	1397	2960	2935	2298	2812	3136	2920
EA665_011185|cytochrome_bd-I_ubiquinol_oxidase_subunit_CydA	3036.37	1.11152	0.0776424	14.3159	1.74038e-46	1.19535e-43	1824	1772	1925	3692	3773	2783	3642	4193	3780
EA665_009920|LysR_family_transcriptional_regulator	592.235	1.48326	0.106445	13.9345	3.9081e-44	2.30075e-41	258	328	287	687	831	578	751	787	821
EA665_012885|poly-beta-1,6-N-acetyl-D-glucosamine_N-deacetylase_PgaB	105.692	-2.95503	0.221634	-13.3329	1.48939e-40	7.67224e-38	283	287	268	39	33	21	30	19	19
CP039343_2128636_2128721	309.814	2.23165	0.17121	13.0346	7.78046e-39	3.56259e-36	101	107	60	321	482	286	475	512	450
EA665_019425|matrixin_family_metalloprotease	389.037	-1.52841	0.117334	-13.0261	8.69036e-39	3.5813e-36	707	690	722	197	261	174	273	286	316
CP039343_1410413_1410641	105.443	3.32076	0.271213	12.2441	1.80619e-34	6.76664e-32	11	16	18	126	164	98	172	171	172
EA665_011420|recombinase_RecA	7376	0.909011	0.0748146	12.1502	5.7244e-34	1.96586e-31	5101	5433	4946	8012	9636	7252	7786	9274	9053
CP039343_1897865_1897969	4827.04	-1.10731	0.0932497	-11.8747	1.60216e-32	5.07885e-30	8443	8439	6897	3005	3665	2787	3788	3824	3788
EA665_011295|phosphoenolpyruvate--protein_phosphotransferase	1206.7	1.05477	0.0908135	11.6147	3.47054e-31	1.02158e-28	732	785	761	1449	1504	1109	1563	1578	1394
EA665_011200|cytochrome_bd_biosynthesis_protein	422.46	1.24957	0.110358	11.3228	1.01136e-29	2.77854e-27	228	242	258	520	544	419	485	570	532
EA665_011460|outer_membrane_protein_assembly_factor_BamA	5204.6	0.759506	0.0693199	10.9565	6.18243e-28	1.59236e-25	3658	3632	3748	5696	5963	4391	6538	6733	6796
EA665_011030|CTP_synthase	5321.43	0.708149	0.0658914	10.7472	6.10757e-27	1.48055e-24	3870	3973	3942	5505	6327	4684	6456	6828	6603
EA665_000520|IS66_family_insertion_sequence_hypothetical_protein	351.36	1.45091	0.135736	10.6892	1.1439e-26	2.6189e-24	163	179	175	367	466	374	519	473	434
EA665_011495|30S_ribosomal_protein_S12_methylthiotransferase_RimO	2821.69	0.781224	0.0735185	10.6262	2.25057e-26	4.88137e-24	1970	2145	1995	2922	3436	2630	3361	3547	3491
EA665_019085|L-lactate_permease	1035.53	1.14379	0.111145	10.291	7.73594e-25	1.56186e-22	581	640	653	1114	1314	1100	1034	1474	1407
EA665_012880|poly-beta-1,6_N-acetyl-D-glucosamine_synthase	53.6115	-3.35938	0.326525	-10.2883	7.95899e-25	1.56186e-22	142	135	162	12	18	7	17	10	6
EA665_011305|PTS_fructose_transporter_subunit_IIBC	642.425	1.0681	0.104612	10.2101	1.78602e-24	3.34555e-22	383	394	419	803	803	553	794	789	863
EA665_011490|UMP_kinase	3563.43	0.815428	0.0804959	10.1301	4.06417e-24	7.28194e-22	2429	2689	2511	4249	4133	3132	4422	4308	4315
EA665_015930|hypothetical_protein	363.503	1.56651	0.155677	10.0626	8.08538e-24	1.38833e-21	164	192	168	371	509	439	367	582	461
EA665_010670|hydrolase	1122.32	1.05189	0.105609	9.96018	2.27649e-23	3.75257e-21	690	799	700	1304	1407	1161	1074	1475	1487
EA665_011465|RIP_metalloprotease_RseP	1846.49	0.793837	0.080885	9.8144	9.76186e-23	1.54726e-20	1318	1304	1292	1989	2115	1700	2342	2288	2326
EA665_011455|OmpH_family_outer_membrane_protein	1648.38	0.763825	0.0786776	9.7083	2.77934e-22	4.2421e-20	1148	1219	1116	1654	1971	1448	2003	2196	2183
EA665_011035|internalin	2417.01	0.745323	0.0770277	9.67605	3.81177e-22	5.6101e-20	1798	1873	1752	2852	2860	2098	2664	2977	2991
EA665_011020|phosphopyruvate_hydratase	3713.1	0.742922	0.07772	9.55896	1.18941e-21	1.69019e-19	2484	2808	2584	4084	4167	3063	4873	4762	4837
EA665_012990|hypothetical_protein	1662.23	-0.885181	0.0941204	-9.40477	5.21433e-21	7.16275e-19	2586	2816	2721	1423	1377	982	952	1238	1241
EA665_009485|HAD_family_hydrolase	672.595	-0.971641	0.10404	-9.33908	9.71747e-21	1.2918e-18	1039	958	1095	436	501	411	517	627	629
EA665_011475|phosphatidate_cytidylyltransferase	1761.06	0.780267	0.0838864	9.30147	1.38517e-20	1.78384e-18	1260	1320	1234	1831	2109	1662	2207	2200	2073
EA665_011470|1-deoxy-D-xylulose-5-phosphate_reductoisomerase	1341.32	0.807449	0.08836	9.13817	6.35158e-20	7.93177e-18	902	939	911	1299	1596	1227	1755	1837	1670
EA665_011250|Grx4_family_monothiol_glutaredoxin	1414.46	0.798152	0.0879525	9.07482	1.13868e-19	1.37542e-17	955	1032	1031	1651	1645	1210	1779	1688	1801
EA743_00490|IS3_family_transposase	54.5653	-2.89668	0.319297	-9.07203	1.16816e-19	1.37542e-17	140	149	128	23	23	3	12	24	17
EA665_011025|3-deoxy-8-phosphooctulonate_synthase	3284.04	0.647969	0.0716841	9.03923	1.57773e-19	1.80606e-17	2419	2679	2428	3405	3818	2881	3963	4064	4088
EA665_000270|DUF1328_domain-containing_protein	1260.89	-0.866668	0.0975873	-8.88096	6.62879e-19	7.38304e-17	1824	2080	2033	827	1075	874	864	1018	1018
EA665_011480|di-trans,poly-cis-decaprenylcistransferase	1764.2	0.723917	0.0817632	8.85382	8.45767e-19	9.05397e-17	1237	1363	1256	1856	2028	1568	2272	2254	2127
EA665_007785|phenylacetic_acid_degradation_operon_negative_regulatory_protein_PaaX	716.4	1.06271	0.120049	8.85236	8.56843e-19	9.05397e-17	397	460	461	667	950	734	792	1042	962
EA665_007780|phenylacetate--CoA_ligase	1967.18	1.10029	0.124909	8.80873	1.26567e-18	1.30396e-16	1140	1153	1189	1676	2592	2091	2183	2941	2778
EA665_011115|ribose-5-phosphate_isomerase_RpiA	1065.42	0.80287	0.0917177	8.75371	2.06449e-18	2.07507e-16	789	765	781	1286	1233	972	1252	1337	1196
EA665_011485|ribosome_recycling_factor	2134.25	0.777739	0.0894241	8.6972	3.40178e-18	3.3378e-16	1456	1621	1531	2544	2529	1732	2681	2554	2682
EA665_011140|peptidase_M16	1588.79	0.701546	0.0807333	8.68967	3.6349e-18	3.41215e-16	1181	1149	1144	1678	1839	1337	2033	2021	2017
CP039343_3339112_3339199	274.173	10.2873	1.18389	8.68941	3.64316e-18	3.41215e-16	0	1	0	409	423	320	448	428	399
EA665_011300|1-phosphofructokinase	331.785	1.06059	0.122497	8.65813	4.79585e-18	4.39193e-16	207	213	186	401	386	297	416	452	437
EA665_008145|hypothetical_protein	56163.4	-0.804944	0.0932111	-8.63571	5.83617e-18	5.22844e-16	87243	88306	85166	39861	47102	40079	35449	46489	46678
CP039343_1698312_1698596	30288.6	-0.801028	0.0934195	-8.57453	9.9489e-18	8.72328e-16	48479	47188	44966	22559	24541	21583	19088	24598	25301
EA665_011945|hypothetical_protein	92.5543	1.9065	0.223528	8.52914	1.47438e-17	1.26582e-15	30	40	34	113	126	95	121	119	152
EA665_011445|3-hydroxyacyl-ACP_dehydratase_FabZ	2304.99	0.779708	0.0930273	8.3815	5.22573e-17	4.39495e-15	1576	1735	1604	2408	2716	2097	3153	2887	2645
EA665_007750|phenylacetate-CoA_oxygenase_subunit_PaaJ	662.47	1.08754	0.130647	8.32423	8.48754e-17	6.99543e-15	445	339	447	721	837	680	656	931	909
EA665_009910|hypothetical_protein	169.188	-1.44423	0.175608	-8.22416	1.96558e-16	1.58827e-14	310	296	299	69	118	97	132	139	110
EA665_011150|adenosine_kinase	1016.3	0.694369	0.0848037	8.18796	2.65701e-16	2.10568e-14	751	788	761	1111	1208	877	1236	1245	1223
EA665_007755|phenylacetate-CoA_oxygenase/reductase_subunit_PaaK	1435.03	0.981927	0.120877	8.12337	4.5343e-16	3.52563e-14	964	822	1037	1477	1884	1419	1377	2007	1969
CP039343_2055691_2056469	136.793	-1.45279	0.178933	-8.11918	4.69333e-16	3.58171e-14	221	233	236	66	93	58	119	148	103
EA665_002430|hypothetical_protein	1219.83	0.738991	0.0912657	8.09714	5.62675e-16	4.21597e-14	890	867	942	1272	1487	1105	1385	1694	1398
EA665_007790|gamma_carbonic_anhydrase_family_protein	273.099	1.18568	0.147087	8.06107	7.56298e-16	5.56554e-14	159	147	171	269	360	297	301	352	398
EA665_007775|3-oxoadipyl-CoA_thiolase	1532.42	0.983954	0.123314	7.97923	1.47247e-15	1.06457e-13	929	1011	1074	1429	1988	1654	1500	2159	2063
EA665_006745|phage_tail_protein	147.205	1.37983	0.175951	7.84216	4.42849e-15	3.14652e-13	69	90	76	169	188	164	154	214	196
EA665_015595|adenosylmethionine--8-amino-7-oxononanoate_transaminase	204.758	1.21982	0.155813	7.82873	4.92839e-15	3.44235e-13	92	138	119	233	266	197	283	257	258
EA665_015605|trehalose-phosphatase	129.362	-1.39402	0.178974	-7.78894	6.7575e-15	4.64127e-13	226	271	237	73	87	78	58	92	78
EA665_014845|choline_dehydrogenase	263.006	-1.11285	0.143394	-7.76077	8.4413e-15	5.70272e-13	455	410	435	159	171	180	208	206	198
CP039343_2433259_2433494	75.376	-1.78712	0.232554	-7.68473	1.53319e-14	1.01907e-12	138	161	126	30	39	36	61	52	60
EA665_011215|signal_recognition_particle-docking_protein_FtsY	1092.15	0.687605	0.0898676	7.65131	1.98941e-14	1.30133e-12	758	867	811	1247	1264	866	1277	1422	1406
EA665_010675|antibiotic_biosynthesis_monooxygenase	646.671	0.874903	0.11453	7.63909	2.18761e-14	1.40862e-12	418	502	445	697	884	575	634	833	870
EA665_012035|hypothetical_protein	2340.33	0.793472	0.10403	7.62731	2.39694e-14	1.51966e-12	1727	1656	1755	3101	2731	1858	2684	2738	2930
EA665_011440|acyl-ACP--UDP-N-acetylglucosamine_O-acyltransferase	2596.1	0.705773	0.092688	7.6145	2.64717e-14	1.65288e-12	1792	2018	1853	2545	3100	2273	3580	3260	3085
EA665_011450|UDP-3-O-(3-hydroxymyristoyl)glucosamine_N-acyltransferase	1758.29	0.708948	0.0942572	7.52142	5.41853e-14	3.3328e-12	1187	1395	1276	1617	2139	1634	2213	2294	2160
EA665_007760|2,3-dehydroadipyl-CoA_hydratase	823.019	0.972074	0.129362	7.51439	5.7178e-14	3.46516e-12	508	547	571	747	1061	903	832	1175	1067
EA665_007730|phenylacetic_acid_degradation_bifunctional_protein_PaaZ	3627.24	0.795204	0.105919	7.50763	6.02062e-14	3.59579e-12	2709	2253	2932	4135	4355	3276	3593	4807	4748
EA665_011195|cytochrome_bd-I_oxidase_subunit_CydX	245.33	0.998269	0.136061	7.33694	2.18527e-13	1.2865e-11	161	158	155	299	273	237	285	326	315
EA665_010625|histidine_kinase	591.886	0.742274	0.102321	7.25436	4.03574e-13	2.34243e-11	430	449	398	647	719	475	742	769	742
EA665_015590|8-amino-7-oxononanoate_synthase	179.69	1.29764	0.179746	7.21934	5.2241e-13	2.97074e-11	107	85	100	179	262	177	273	226	206
EA665_008935|trifunctional_transcriptional_regulator/proline_dehydrogenase/L-glutamate_gamma-semialdehyde_dehydrogenase	8228.9	0.50498	0.0699578	7.21835	5.2624e-13	2.97074e-11	6839	6821	7013	8179	9482	7434	8839	10255	9692
EA665_011120|threonine_ammonia-lyase,_biosynthetic	954.558	0.722732	0.100179	7.21437	5.41838e-13	3.01745e-11	700	735	625	1088	1111	734	1214	1246	1216
CP039343_1697985_1698090	7462.07	-0.842832	0.117397	-7.17933	7.00549e-13	3.84928e-11	10613	12227	11677	4478	6515	5368	4830	6703	6333
EA665_008945|sodium/proline_symporter_PutP	1368.12	0.686243	0.0959755	7.15019	8.66598e-13	4.69901e-11	966	1025	988	1466	1525	1124	1923	1677	1704
EA665_011135|phospholipase	785.05	0.703454	0.098507	7.14116	9.25462e-13	4.95303e-11	612	584	559	776	964	712	959	1019	918
EA665_014840|betaine-aldehyde_dehydrogenase	439.948	-0.956464	0.135139	-7.07762	1.46654e-12	7.74823e-11	731	698	725	257	359	327	270	365	315
EA665_019070|D-lactate_dehydrogenase	664.837	0.864836	0.123448	7.00568	2.45796e-12	1.28219e-10	416	474	471	613	807	688	693	896	943
EA665_011530|ornithine_carbamoyltransferase	1283.22	0.738083	0.106472	6.93215	4.1448e-12	2.13509e-10	974	885	928	1594	1432	986	1532	1592	1717
EA665_010620|hypothetical_protein	487.676	0.749809	0.108263	6.92583	4.33441e-12	2.2052e-10	332	337	362	487	611	396	577	676	655
EA665_011100|N-acetyl-gamma-glutamyl-phosphate_reductase	615.104	0.67904	0.0986104	6.88609	5.73475e-12	2.88206e-10	440	488	479	622	768	544	719	735	776
EA665_015585|malonyl-[acyl-carrier_protein]_O-methyltransferase_BioC	106.844	1.44049	0.209446	6.87764	6.08524e-12	3.02136e-10	53	51	48	118	130	105	177	131	146
EA665_010660|quinoprotein_glucose_dehydrogenase	1292.88	0.656602	0.095654	6.86434	6.67983e-12	3.27709e-10	994	1067	1013	1545	1499	1116	1250	1682	1545
EA665_011085|ATP-dependent_Clp_protease_ATP-binding_subunit_ClpA	2344.3	0.535917	0.0781497	6.85757	7.00441e-12	3.3959e-10	1753	2031	2044	2506	2675	2052	2492	2972	2728
CP039343_1616582_1616635	480.892	0.929018	0.135814	6.84035	7.90022e-12	3.78567e-10	328	266	345	442	598	487	525	666	684
EA665_012565|iron-containing_alcohol_dehydrogenase	302.79	1.10917	0.162401	6.82986	8.49996e-12	4.02625e-10	189	203	199	302	420	362	282	451	304
EA665_007745|phenylacetate-CoA_oxygenase_subunit_PaaI	1580.68	0.86877	0.128216	6.77584	1.23688e-11	5.79226e-10	1165	848	1224	1712	1968	1410	1576	2201	2210
CP039343_1899643_1899799	1153.64	-0.768726	0.114781	-6.69733	2.12264e-11	9.82855e-10	1618	1570	1570	808	868	711	1061	1460	981
EA665_007770|3-hydroxyacyl-CoA_dehydrogenase	1949.93	0.879428	0.131344	6.69558	2.14815e-11	9.83612e-10	1198	1498	1335	1680	2582	2050	1942	2862	2464
EA665_006775|hypothetical_protein	88.9969	1.46817	0.219785	6.68003	2.38895e-11	1.08185e-09	34	48	42	98	113	83	109	128	149
EA665_011245|aspartate_aminotransferase_family_protein	375.02	0.953763	0.144166	6.61571	3.69771e-11	1.65633e-09	250	211	252	483	431	280	467	459	568
EA665_009905|hypothetical_protein	176.981	-1.25499	0.19253	-6.51841	7.10557e-11	3.14861e-09	313	322	265	71	124	124	116	156	145
EA665_011145|TonB-dependent_siderophore_receptor	538.273	1.0166	0.156143	6.51069	7.4807e-11	3.27957e-09	363	327	318	643	632	477	895	603	584
EA665_007735|1,2-phenylacetyl-CoA_epoxidase_subunit_A	3264.17	0.686068	0.1061	6.46625	1.00467e-10	4.35816e-09	2588	2177	2724	4004	3705	2673	3387	4097	4226
EA665_007795|PaaI_family_thioesterase	77.6459	1.50357	0.236942	6.34571	2.21402e-10	9.50415e-09	35	42	39	77	120	85	79	118	103
CP039343_2742732_2742879	685.914	-0.955441	0.151077	-6.32419	2.54568e-10	1.08152e-08	946	1261	1107	435	611	420	346	610	618
EA665_011735|translesion_error-prone_DNA_polymerase_V_autoproteolytic_subunit	44.512	2.03053	0.322609	6.2941	3.09196e-10	1.3002e-08	17	13	15	65	47	45	65	66	65
EA665_018935|alanine_racemase	452.954	0.695913	0.111078	6.2651	3.72591e-10	1.55096e-08	320	355	371	541	524	389	475	553	573
EA665_019230|acyl-CoA_desaturase	51.9749	2.13794	0.342891	6.23505	4.51629e-10	1.86116e-08	20	27	12	40	87	91	53	65	60
EA665_007765|2-(1,2-epoxy-1,2-dihydrophenyl)acetyl-CoA_isomerase	1006.49	0.871016	0.139981	6.22237	4.89687e-10	1.99802e-08	690	766	690	867	1351	1119	939	1416	1228
EA665_014420|copper_resistance_protein_NlpE	661.461	-0.815209	0.131075	-6.21942	4.99007e-10	2.01609e-08	880	1152	1013	491	594	402	380	620	584
EA665_010655|potassium_transporter	634.318	0.799289	0.12862	6.21436	5.15341e-10	2.06186e-08	409	483	479	602	726	691	658	912	753
EA665_007525|hypothetical_protein	2339.61	-0.463886	0.0748957	-6.19376	5.87471e-10	2.32785e-08	3052	2936	2939	1878	2157	1531	2273	2377	2347
EA665_011205|DUF2057_domain-containing_protein	49.6933	1.77135	0.286297	6.1871	6.1282e-10	2.40517e-08	19	23	23	57	76	57	70	61	57
EA665_011625|molybdopterin_molybdotransferase_MoeA	216.762	0.974039	0.157992	6.16511	7.04336e-10	2.73827e-08	100	144	160	213	252	211	272	323	284
EA665_014825|choline_transporter	554.2	-0.725814	0.118423	-6.12898	8.84437e-10	3.40632e-08	759	861	783	358	524	365	423	485	551
EA665_019080|transcriptional_regulator_LldR	450.573	0.792783	0.130805	6.06078	1.35467e-09	5.16907e-08	320	335	321	421	537	479	447	605	597
CP039343_96708_96769	43.0638	-1.91772	0.31829	-6.02508	1.69031e-09	6.39061e-08	97	92	90	30	23	11	14	15	32
EA665_006765|hypothetical_protein	100.843	1.19732	0.199034	6.01566	1.79158e-09	6.71191e-08	63	67	49	117	146	91	117	125	135
EA665_018930|RidA_family_protein	476.44	0.885647	0.14726	6.01416	1.80818e-09	6.71306e-08	268	385	351	428	633	516	473	662	579
EA665_007740|1,2-phenylacetyl-CoA_epoxidase_subunit_B	386.469	0.849873	0.141531	6.00486	1.91493e-09	7.04592e-08	283	216	300	458	460	323	391	526	546
EA665_011740|Y-family_DNA_polymerase	31.2924	2.32031	0.388269	5.97604	2.28623e-09	8.33765e-08	9	8	10	36	48	32	41	52	45
EA665_011630|bifunctional_molybdenum_cofactor_biosynthesis_protein_MoaC/MoaB	217.191	0.941801	0.158297	5.94959	2.68812e-09	9.71733e-08	114	147	152	244	240	194	224	333	321
EA665_019235|ferredoxin_reductase	67.048	1.96035	0.329788	5.94428	2.77677e-09	9.95049e-08	18	36	24	39	116	101	77	96	88
EA665_011265|type_I_methionyl_aminopeptidase	405.696	0.82104	0.138466	5.92954	3.03789e-09	1.07924e-07	312	271	303	555	500	302	483	475	473
EA665_006760|hypothetical_protein	107.22	1.19778	0.202323	5.92017	3.21611e-09	1.13279e-07	53	66	73	141	154	86	132	118	146
EA665_004990|NADP-dependent_isocitrate_dehydrogenase	978.392	0.576026	0.0977013	5.89578	3.72915e-09	1.30236e-07	819	800	805	1097	1094	899	927	1209	1200
EA665_011155|Rieske_(2Fe-2S)_protein	588.05	0.572176	0.0972034	5.88637	3.94764e-09	1.35868e-07	486	489	451	634	672	512	673	703	705
EA665_014835|transcriptional_regulator_BetI	203.681	-0.960246	0.163141	-5.88601	3.95635e-09	1.35868e-07	322	311	350	107	189	137	131	167	166
EA665_017115|HdeD_family_acid-resistance_protein	116.649	-1.15257	0.196228	-5.87361	4.2641e-09	1.45226e-07	187	217	191	87	78	64	55	103	100
EA665_008625|tautomerase_family_protein	202.383	-0.883719	0.150739	-5.86258	4.55727e-09	1.53938e-07	331	322	293	141	154	142	129	167	183
EA665_008155|iron-containing_redox_enzyme_family_protein	927.476	-0.857973	0.146636	-5.85104	4.88513e-09	1.63672e-07	1225	1637	1369	570	905	540	559	926	868
EA665_011270|branched-chain_amino_acid_transport_system_II_carrier_protein	685.339	0.809589	0.13889	5.82899	5.57642e-09	1.84432e-07	482	531	529	729	905	680	889	848	573
EA665_009940|CoA_transferase_subunit_A	916.482	-0.750759	0.128809	-5.82846	5.59427e-09	1.84432e-07	1465	1115	1424	807	759	494	685	808	897
EA665_011690|Y-family_DNA_polymerase	44.3011	1.84947	0.31831	5.81027	6.2372e-09	2.03996e-07	15	21	16	68	54	39	58	53	74
EA665_011180|hypothetical_protein	173.535	0.909775	0.157118	5.79038	7.02266e-09	2.27877e-07	105	135	105	202	210	145	225	223	221
CP039343_2393784_2393835	1146.55	0.616819	0.106671	5.78247	7.36112e-09	2.36994e-07	953	958	795	1354	1297	922	1317	1302	1496
EA665_002095|hypothetical_protein	267.604	-0.916033	0.158741	-5.77061	7.8986e-09	2.52327e-07	408	424	375	138	216	190	201	285	231
EA665_002100|ABC_transporter_ATP-binding_protein	1052.7	-0.523672	0.0910931	-5.74875	8.99046e-09	2.84997e-07	1360	1464	1424	772	979	774	929	1008	944
CP039343_1700800_1700854	893.564	-0.789395	0.137521	-5.74018	9.4575e-09	2.97514e-07	1164	1574	1251	566	832	580	579	932	781
EA665_015580|ATP-dependent_dethiobiotin_synthetase_BioD	101.689	1.16644	0.203431	5.73385	9.81742e-09	3.06497e-07	52	67	52	107	134	89	153	137	128
EA665_011510|nitrogen_regulation_protein_NR(I)	817.651	0.582601	0.102578	5.67959	1.35014e-08	4.18342e-07	698	680	661	800	975	828	813	962	959
CP039344_31435_31754	78.7146	1.27697	0.224918	5.67749	1.36689e-08	4.2037e-07	46	45	35	95	95	72	108	99	114
EA665_010555|type_I_secretion_C-terminal_target_domain-containing_protein	965.444	0.533764	0.0942623	5.66254	1.49146e-08	4.55281e-07	804	767	806	1079	1013	850	1094	1121	1202
EA665_006785|hypothetical_protein	60.3436	1.45911	0.258079	5.65374	1.56992e-08	4.7571e-07	27	37	29	59	93	67	75	77	77
EA665_011415|RNA-binding_protein	1301.43	0.642486	0.113755	5.64798	1.62343e-08	4.88331e-07	1074	1147	1035	1216	1785	1346	1156	1515	1466
EA665_002110|outer_membrane_lipid_asymmetry_maintenance_protein_MlaD	1061.53	-0.493996	0.0878691	-5.62195	1.88811e-08	5.63834e-07	1376	1484	1370	873	1021	691	987	1022	928
EA665_006770|hypothetical_protein	78.6976	1.27909	0.228175	5.60571	2.07397e-08	6.14881e-07	38	48	46	80	110	84	81	103	118
EA665_001490|sel1_repeat_family_protein	466.76	-0.621464	0.113265	-5.48684	4.09199e-08	1.20451e-06	629	645	700	417	421	269	365	412	443
EA665_002105|lipid_asymmetry_maintenance_ABC_transporter_permease_subunit_MlaE	664.779	-0.543332	0.0992186	-5.47611	4.3477e-08	1.2707e-06	837	938	945	505	633	462	598	627	559
EA665_011230|hypothetical_protein	872.964	0.618204	0.112929	5.47425	4.39359e-08	1.27507e-06	684	737	647	791	1065	853	876	1157	1090
EA665_012580|aldehyde_dehydrogenase_family_protein	2756.27	0.575052	0.105819	5.43429	5.50166e-08	1.58548e-06	2290	2293	2157	2447	3313	2786	2791	3527	3302
EA665_018940|D-amino_acid_dehydrogenase	957.103	0.64817	0.119316	5.43237	5.56115e-08	1.59149e-06	785	745	759	1283	1050	758	967	1104	1219
CP039343_3096801_3096875	97.3479	1.22794	0.226636	5.41812	6.02277e-08	1.71171e-06	39	65	70	91	137	118	118	106	126
EA665_011110|M48_family_peptidase	265.617	0.766598	0.141596	5.41397	6.16426e-08	1.73993e-06	219	190	191	267	335	271	297	350	272
CP039343_432011_432137	199.299	-0.850916	0.157712	-5.39538	6.83804e-08	1.91698e-06	312	290	290	113	173	137	149	202	171
CP039343_3950626_3950998	123.568	1.02467	0.190942	5.36641	8.03205e-08	2.23649e-06	68	78	95	134	153	131	117	159	177
EA665_006755|DUF2163_domain-containing_protein	72.0624	1.27283	0.238096	5.34586	8.99895e-08	2.4889e-06	32	38	56	83	109	70	91	87	82
EA665_005165|phosphonate_ABC_transporter_substrate-binding_protein	247.391	0.713188	0.133713	5.33372	9.62193e-08	2.64346e-06	193	211	169	261	310	234	282	285	288
EA665_009935|CoA_transferase_subunit_B	528.596	-0.625424	0.11792	-5.3038	1.13418e-07	3.09533e-06	730	625	805	440	437	326	444	510	548
EA665_008785|DMT_family_transporter	2816.46	-0.468015	0.0891179	-5.25164	1.50751e-07	4.08713e-06	3556	3760	3964	2358	2732	1920	2074	2758	2751
EA665_014425|isocitrate_lyase	623.679	-0.583002	0.111475	-5.22987	1.69631e-07	4.56894e-06	863	804	870	457	582	416	473	660	615
EA665_011940|hypothetical_protein	43.8346	1.54822	0.297413	5.20563	1.93343e-07	5.17381e-06	16	29	20	57	56	49	48	59	58
CP039343_3351342_3351510	2625.63	-0.643795	0.123964	-5.19339	2.06497e-07	5.49016e-06	3599	4077	3780	1876	2514	1883	1525	2487	2415
EA665_010090|pyrroloquinoline_quinone_biosynthesis_protein_PqqB	408.25	-0.583372	0.112432	-5.18868	2.11793e-07	5.59486e-06	560	578	549	334	368	265	314	371	416
EA665_011710|hypothetical_protein	176.466	0.771103	0.14999	5.14102	2.73255e-07	7.13507e-06	128	135	124	193	223	152	189	222	233
CP039343_1906228_1906597	93.1824	-1.20158	0.233733	-5.14081	2.7356e-07	7.13507e-06	143	159	147	55	56	55	60	125	65
EA665_001195|4-aminobutyrate--2-oxoglutarate_transaminase	1608.64	0.430448	0.0845615	5.09036	3.57388e-07	9.26287e-06	1275	1527	1358	1561	1900	1350	1850	1952	1841
EA665_011435|tetratricopeptide_repeat_protein	813.961	0.566206	0.111406	5.08238	3.72731e-07	9.60014e-06	663	685	644	903	967	669	1070	884	885
EA665_011280|hypothetical_protein	391.61	0.667464	0.131777	5.06509	4.082e-07	1.04484e-05	311	288	302	484	412	331	409	458	550
EA665_008165|SDR_family_oxidoreductase	619.169	-0.766925	0.151981	-5.04618	4.50723e-07	1.14656e-05	798	1085	980	380	591	462	344	573	490
EA665_019075|alpha-hydroxy-acid_oxidizing_protein	418.739	0.755494	0.150396	5.02337	5.07714e-07	1.28361e-05	245	374	298	380	517	420	418	623	515
EA665_010665|LysR_family_transcriptional_regulator	294.503	0.626346	0.125373	4.99588	5.85685e-07	1.47171e-05	234	236	204	320	328	245	346	401	358
EA665_006750|hypothetical_protein	70.5952	1.15262	0.231706	4.97449	6.54184e-07	1.63387e-05	43	37	47	88	86	68	73	103	91
EA665_007530|type_VI_secretion_system_contractile_sheath_small_subunit	2537	-0.369587	0.0743491	-4.97097	6.66191e-07	1.65384e-05	3066	3162	3127	2233	2348	1649	2531	2612	2556
EA665_015735|hypothetical_protein	1951.3	-0.591143	0.119131	-4.96214	6.97193e-07	1.71686e-05	2537	2932	2730	1320	1826	1488	1316	1930	1843
EA665_012535|hypothetical_protein	48.9607	-1.40587	0.283362	-4.96139	6.99909e-07	1.71686e-05	75	112	90	36	34	20	22	26	42
EA665_016275|ribosome-associated_translation_inhibitor_RaiA	3846.99	-0.654906	0.132163	-4.95531	7.22157e-07	1.76095e-05	4958	6090	5490	2550	3721	2715	2346	3856	3721
EA665_011605|TusE/DsrC/DsvC_family_sulfur_relay_protein	100.546	0.924187	0.18679	4.94774	7.50799e-07	1.82003e-05	77	74	73	122	141	102	108	101	104
CP039343_3933442_3933800	203.754	-0.698694	0.141492	-4.93806	7.89036e-07	1.90153e-05	301	310	298	181	167	132	164	147	171
EA665_010940|glucose/quinate/shikimate_family_membrane-bound_PQQ-dependent_dehydrogenase	107.611	0.997549	0.202587	4.92404	8.47749e-07	2.01948e-05	72	69	65	104	156	95	152	144	116
EA665_011090|ATP-dependent_Clp_protease_adapter_ClpS	657.522	0.481232	0.0977313	4.92403	8.47779e-07	2.01948e-05	558	552	590	752	734	551	681	757	786
EA665_011240|CBS_domain-containing_protein	584.066	0.578518	0.117573	4.92048	8.633e-07	2.04463e-05	425	483	496	711	652	443	612	711	777
EA665_012875|poly-beta-1,6-N-acetyl-D-glucosamine_biosynthesis_protein_PgaD	19.7373	-2.10855	0.42868	-4.9187	8.71212e-07	2.05158e-05	46	49	45	11	11	6	9	5	3
CP039343_2379722_2379867	1854.71	0.56576	0.11521	4.91068	9.07599e-07	2.12512e-05	1450	1566	1487	2050	2516	1253	1948	2380	2284
EA665_010115|hypothetical_protein	1880.84	-0.654312	0.133317	-4.90794	9.20357e-07	2.14282e-05	2522	3035	2567	1281	1898	1260	1134	1873	1777
EA665_011545|hypothetical_protein	116.575	0.888651	0.181449	4.89753	9.70498e-07	2.23801e-05	85	80	78	135	143	108	116	151	157
EA665_011365|S8_family_peptidase	127.474	0.906648	0.185136	4.8972	9.72105e-07	2.23801e-05	89	83	100	128	188	123	117	171	153
CP039341_2060392_2060657	51.1511	1.34198	0.275005	4.87983	1.06176e-06	2.43084e-05	31	24	26	51	77	49	66	66	71
EA665_009690|hypothetical_protein	138.833	-0.779188	0.160022	-4.86925	1.12022e-06	2.55051e-05	204	229	208	110	112	97	94	116	106
EA665_011010|cell_division_protein_FtsB	377.302	0.576792	0.118511	4.86701	1.13297e-06	2.56537e-05	301	308	292	367	423	357	412	450	503
EA665_011925|hypothetical_protein	39.9983	1.52086	0.312728	4.8632	1.15501e-06	2.60099e-05	17	22	20	60	53	33	55	48	52
EA665_003525|hypothetical_protein	1751.64	-0.402654	0.0831635	-4.84172	1.28722e-06	2.87165e-05	2297	2333	2331	1628	1531	1333	1464	1544	1540
CP039343_3946602_3947044	296.865	0.788967	0.162962	4.84142	1.28914e-06	2.87165e-05	182	243	182	242	364	288	307	432	453
EA665_004180|MBL_fold_metallo-hydrolase	367.688	-0.557599	0.115639	-4.8219	1.42201e-06	3.15059e-05	483	514	496	323	305	241	292	379	347
EA665_011320|GGDEF_domain-containing_protein	400.581	0.593274	0.123225	4.81455	1.47535e-06	3.25129e-05	342	319	330	511	447	328	409	453	488
EA665_011770|TIGR02594_family_protein	39.7754	1.48904	0.310068	4.80231	1.56847e-06	3.43813e-05	15	25	23	50	50	50	51	43	46
EA665_001115|carbapenem_susceptibility_porin_CarO	3227.41	0.478561	0.0997944	4.79547	1.62291e-06	3.53863e-05	2517	2911	2640	3296	3584	2743	4349	3681	3520
EA665_001935|Glu/Leu/Phe/Val_dehydrogenase	4026.44	0.429155	0.0902137	4.75709	1.96401e-06	4.25983e-05	3265	3470	3368	3855	4423	3371	5357	5004	4433
EA665_006780|hypothetical_protein	33.3333	1.62941	0.343005	4.75041	2.03003e-06	4.36362e-05	16	21	13	40	56	37	46	31	37
CP039343_1999834_2000332	158.447	-1.05211	0.221491	-4.75011	2.03304e-06	4.36362e-05	219	275	266	85	165	70	80	168	152
EA665_011875|DUF1983_domain-containing_protein	97.8786	0.961488	0.203529	4.72407	2.31166e-06	4.93593e-05	67	74	51	108	118	94	100	138	134
EA665_011595|hypothetical_protein	149.352	0.757943	0.161163	4.70296	2.56419e-06	5.44692e-05	98	112	112	154	181	132	191	196	176
EA665_012525|SCPU_domain-containing_protein	290.798	-0.732595	0.156553	-4.67953	2.87535e-06	6.07657e-05	389	518	408	170	270	232	205	243	235
CP039343_2118291_2118741	28.1154	1.89631	0.409709	4.62843	3.68444e-06	7.74672e-05	21	6	11	35	56	32	18	40	32
EA665_002870|HAMP_domain-containing_histidine_kinase	576.701	-0.510365	0.110449	-4.62082	3.82227e-06	7.99572e-05	738	814	790	501	545	369	411	584	555
EA665_011765|hypothetical_protein	556.349	0.484247	0.105096	4.60766	4.0723e-06	8.46817e-05	436	459	508	584	629	470	561	699	707
EA665_011210|nitroreductase_family_protein	262.612	0.626446	0.135983	4.6068	4.08921e-06	8.46817e-05	201	211	227	284	307	252	239	344	309
EA665_010310|IclR_family_transcriptional_regulator	144.371	0.766563	0.166556	4.60243	4.17588e-06	8.6044e-05	112	102	103	179	161	123	157	182	187
EA665_009930|short-chain_fatty_acid_transporter	936.569	-0.460869	0.101134	-4.557	5.18902e-06	0.000106388	1243	1170	1234	764	823	678	731	968	978
EA665_010615|restriction_endonuclease	154.588	0.763029	0.167907	4.54436	5.51022e-06	0.000112414	107	123	91	140	189	138	203	201	209
EA665_004055|hypothetical_protein	84.0811	0.935123	0.205845	4.54286	5.54968e-06	0.000112661	63	63	59	106	116	82	78	84	105
EA665_013220|NirD/YgiW/YdeI_family_stress_tolerance_protein	105.796	-0.885197	0.194955	-4.54051	5.61187e-06	0.000112906	167	176	176	76	89	75	47	79	89
EA665_011620|transcriptional_regulator	125.118	0.851863	0.187621	4.54033	5.61654e-06	0.000112906	91	85	89	159	156	98	116	175	167
EA665_010900|phosphotransferase_family_protein	159.465	0.724554	0.160098	4.52569	6.0199e-06	0.000120427	123	111	112	160	186	144	171	221	217
EA665_000385|HutD_family_protein	99.7636	0.891807	0.197448	4.51668	6.28179e-06	0.000125059	59	82	72	105	132	101	95	132	122
CP039343_2602268_2602490	286.284	0.560298	0.12419	4.5116	6.43398e-06	0.00012723	215	233	231	275	339	245	330	388	344
EA665_013245|DUF2171_domain-containing_protein	965.15	-1.05349	0.233539	-4.51099	6.45256e-06	0.00012723	1437	1824	1604	648	832	539	425	840	809
CP039343_1928110_1928322	2065.34	-0.492476	0.109593	-4.49368	7.00038e-06	0.000137374	2439	2555	2587	1467	1799	1350	2072	2831	1924
EA665_012325|acetyl-CoA_C-acetyltransferase	519.386	-0.468599	0.104337	-4.49118	7.08289e-06	0.000138335	664	736	720	410	483	413	418	449	456
EA665_010630|DNA_cytosine_methyltransferase	141.297	0.793721	0.178093	4.45678	8.31998e-06	0.000161729	104	84	113	127	187	134	161	180	188
EA665_014465|sulfate_adenylyltransferase_subunit_CysD	919.64	0.438007	0.0983721	4.45255	8.48557e-06	0.000164174	707	870	765	894	1076	754	1142	1089	1059
EA665_007545|type_VI_secretion_system_baseplate_subunit_TssE	1081.03	-0.406161	0.0915408	-4.43694	9.1247e-06	0.000175714	1303	1325	1418	924	963	731	1128	1029	1089
EA665_018250|nucleotidyltransferase	177.358	0.814701	0.185762	4.38572	1.15602e-05	0.00022158	137	104	131	251	190	125	191	251	231
EA665_007410|voltage-gated_chloride_channel_protein	243.04	-0.656239	0.150156	-4.37039	1.24027e-05	0.000236117	316	343	368	156	253	153	195	257	202
CP039343_3541341_3542029	11301.2	-0.319031	0.0730074	-4.36985	1.24333e-05	0.000236117	14499	14351	14659	10052	10755	8958	8925	10680	10299
EA665_016695|ketol-acid_reductoisomerase	2194.35	0.324912	0.0747298	4.34782	1.37497e-05	0.00025992	1941	2042	1962	2293	2270	1810	2440	2600	2575
EA665_012455|mechanosensitive_ion_channel	85.2241	-0.913812	0.211363	-4.32343	1.53625e-05	0.000289081	128	142	131	66	63	53	56	58	89
EA665_018615|hypothetical_protein	155.325	-0.704656	0.163049	-4.32173	1.54807e-05	0.000289982	233	223	210	110	128	111	109	158	146
EA665_002045|PspC_domain-containing_protein	344.673	-0.537393	0.124376	-4.32071	1.55528e-05	0.000290014	434	465	461	298	306	203	273	366	372
EA665_001350|aquaporin_Z	121.054	-0.754723	0.174779	-4.31816	1.57333e-05	0.000292058	178	193	174	90	121	68	97	107	90
EA665_019505|GlsB/YeaQ/YmgE_family_stress_response_membrane_protein	240.987	-0.576462	0.134273	-4.2932	1.76115e-05	0.000325456	337	374	366	202	239	178	134	197	183
EA665_007550|type_VI_secretion_system_baseplate_subunit_TssF	1011.06	-0.381011	0.0889633	-4.28279	1.84561e-05	0.000339543	1230	1164	1269	794	956	669	1056	1075	1070
EA665_008075|acetyl/propionyl/methylcrotonyl-CoA_carboxylase_subunit_alpha	1461.03	-0.397458	0.0929834	-4.27451	1.91561e-05	0.000350854	1744	1833	1820	1093	1396	1024	1292	1717	1504
EA665_010485|NAD(P)-dependent_alcohol_dehydrogenase	72.6891	0.94629	0.221452	4.27312	1.92759e-05	0.000351487	47	50	45	79	85	70	83	98	99
EA665_019435|lytic_murein_transglycosylase	395.681	-0.480438	0.112577	-4.26763	1.97563e-05	0.000358659	451	548	514	339	329	260	367	410	419
EA665_008095|TetR/AcrR_family_transcriptional_regulator	1101.52	-0.600283	0.140994	-4.25751	2.06718e-05	0.000373633	1592	1330	1619	1122	824	633	800	1101	1117
CP039343_2055378_2055469	151.177	-1.74711	0.412047	-4.24008	2.23443e-05	0.0004021	292	280	244	31	117	63	97	159	135
EA665_006225|TonB-dependent_receptor	174.743	0.856586	0.202211	4.2361	2.27435e-05	0.000407504	126	134	106	164	233	171	279	204	155
EA665_011685|ABC_transporter_substrate-binding_protein	54.5146	1.1176	0.264794	4.22062	2.43632e-05	0.000434635	24	39	40	60	74	57	51	76	70
EA665_011255|hypothetical_protein	38.3954	1.27825	0.303964	4.20527	2.60773e-05	0.00046321	25	20	21	50	47	40	42	48	51
CP039343_3984489_3984662	21.0593	2.19638	0.525487	4.17971	2.91884e-05	0.000516246	7	12	1	12	32	33	32	30	27
EA665_011410|haloacid_dehalogenase	124.727	0.73293	0.175683	4.1719	3.02072e-05	0.000531982	100	93	99	144	159	114	115	140	163
CP039343_3060640_3060735	58.0335	-1.09178	0.26233	-4.16186	3.15669e-05	0.000550154	108	81	100	30	47	39	30	56	45
EA665_010380|hypothetical_protein	99.7262	0.808425	0.194265	4.16146	3.16219e-05	0.000550154	84	69	69	118	118	97	100	114	129
EA665_005650|class_C_beta-lactamase_ADC-152	20066.6	0.255509	0.0614007	4.16133	3.16395e-05	0.000550154	18662	19863	18932	20738	21924	16209	20862	22747	22530
EA665_011235|DUF2750_domain-containing_protein	709.337	0.475612	0.114625	4.14928	3.33526e-05	0.000577504	666	610	556	864	727	593	740	823	845
EA665_010490|4-carboxymuconolactone_decarboxylase	36.9208	1.28867	0.312171	4.12807	3.65817e-05	0.000630767	24	21	18	47	54	32	42	44	51
EA665_015785|hypothetical_protein	3647.42	-0.48105	0.116762	-4.11991	3.79023e-05	0.000650814	4387	5511	4964	2645	3575	2850	2466	3607	3450
CP039343_2692959_2693116	112.287	-0.908844	0.220889	-4.11449	3.88042e-05	0.000663535	172	178	202	118	100	39	70	90	74
EA665_004965|NAD(P)/FAD-dependent_oxidoreductase	218.858	-0.559967	0.136168	-4.11234	3.91677e-05	0.000666984	290	312	300	163	211	151	167	209	209
CP039343_2092459_2092682	190.503	-0.596051	0.145256	-4.10346	4.0702e-05	0.000689455	244	287	235	141	160	132	175	198	179
CP039343_2320066_2320173	119.393	0.732186	0.178461	4.10278	4.08219e-05	0.000689455	79	86	94	124	129	114	140	167	146
EA665_011635|molybdenum_cofactor_biosynthesis_protein_MoaE	112.849	0.824839	0.201827	4.08687	4.3724e-05	0.000735456	57	87	102	134	142	98	106	153	144
EA665_005110|ferredoxin_reductase	1742.06	0.48437	0.118554	4.08565	4.39542e-05	0.000736321	1368	1645	1417	1446	2138	1696	2064	2157	1832
EA665_001710|bacterioferritin	1516.09	-0.399571	0.0980229	-4.0763	4.57585e-05	0.000763444	1919	1902	1993	1442	1362	987	1209	1503	1600
EA665_017195|asparaginase	339.331	-0.560219	0.138018	-4.05904	4.92748e-05	0.000818797	454	495	511	284	335	232	248	344	214
CP039343_393356_393988	1966.93	0.363954	0.0900982	4.03952	5.35596e-05	0.000886423	1655	1788	1590	1749	2226	1586	2496	2538	2275
EA665_010220|hypothetical_protein	14.1439	2.27388	0.56351	4.0352	5.4556e-05	0.000899301	8	2	4	23	24	12	14	20	20
EA665_008580|dicarboxylate/amino_acid:cation_symporter	1448.29	-0.453488	0.112529	-4.02997	5.57836e-05	0.000915874	1877	1787	1968	1457	1207	878	1423	1403	1291
EA665_019660|Txe/YoeB_family_addiction_module_toxin	371.913	0.529399	0.131507	4.02564	5.68217e-05	0.000929215	319	322	301	469	403	297	409	382	467
EA665_005160|amino_acid_permease	259.314	0.575333	0.143393	4.01229	6.01318e-05	0.000979459	192	197	234	261	318	219	245	362	330
EA665_005115|acyl-CoA_desaturase	2229.49	0.424457	0.105846	4.01012	6.0687e-05	0.000984611	1852	2143	1853	1912	2661	2118	2484	2790	2384
EA665_011715|MFS_transporter	46.4231	1.14133	0.284861	4.00661	6.15976e-05	0.000995466	36	30	22	52	62	52	57	60	44
EA665_007660|DUF333_domain-containing_protein	472.038	-0.543778	0.135848	-4.00283	6.25904e-05	0.00100756	609	750	642	357	442	370	282	441	436
EA665_004980|NADP-dependent_isocitrate_dehydrogenase	7309.8	0.292264	0.0731699	3.99432	6.48797e-05	0.00104035	6293	6983	6784	7391	7759	5897	8669	8461	8210
EA665_002880|branched-chain_amino_acid_transaminase	1686.41	0.331531	0.0832664	3.98157	6.8463e-05	0.00109355	1501	1517	1557	1554	1931	1448	1933	1967	1905
EA665_009900|aspartate_ammonia-lyase	2512.24	-0.316976	0.0798802	-3.96814	7.24365e-05	0.00114983	2989	3273	3015	2306	2427	1677	2467	2421	2450
CP039343_4021857_4021958	42.2894	-1.24785	0.314496	-3.96778	7.25447e-05	0.00114983	81	73	62	16	29	32	39	34	23
CP039343_709543_709682	1268.59	-0.358366	0.0904646	-3.96139	7.45134e-05	0.00117651	1633	1611	1674	1244	1123	917	1114	1132	1146
EA665_015200|phosphomannomutase/phosphoglucomutase	458.819	-0.501952	0.126961	-3.95359	7.69872e-05	0.00121093	584	643	612	456	395	268	347	455	464
EA665_013070|IS3_family_transposase	40.9387	-1.12289	0.284577	-3.94582	7.95259e-05	0.00124611	67	65	69	32	25	22	27	35	37
EA665_014610|inorganic_phosphate_transporter	1126.74	0.389409	0.0987873	3.9419	8.08394e-05	0.00126189	905	1032	1043	1209	1205	929	1379	1351	1171
EA665_011095|hypothetical_protein	502.819	0.401679	0.102005	3.93783	8.22228e-05	0.0012777	410	445	430	506	545	405	574	600	658
CP039343_3056546_3056663	122.891	-0.686238	0.1743	-3.9371	8.24723e-05	0.0012777	155	183	161	83	100	82	111	119	138
EA665_011540|2-C-methyl-D-erythritol_2,4-cyclodiphosphate_synthase	94.2847	0.787869	0.200494	3.92965	8.50697e-05	0.001313	69	81	66	113	108	97	97	94	122
EA665_007535|type_VI_secretion_system_contractile_sheath_large_subunit	9288.51	-0.268255	0.0683437	-3.92509	8.66974e-05	0.00133313	10859	11042	10857	8272	8751	6352	9648	9801	9506
EA665_011105|hypothetical_protein	179.477	0.614406	0.157023	3.91284	9.12152e-05	0.00139739	135	138	157	165	229	170	190	242	199
EA665_003355|entericidin_A/B_family_lipoprotein	2474.51	-0.423228	0.108244	-3.90995	9.23165e-05	0.00140902	3149	3554	3404	1851	2413	2130	1715	2232	2147
CP039343_58423_58594	55.8295	-0.951775	0.246247	-3.86512	0.000111033	0.00168844	81	92	99	45	39	36	31	49	43
EA665_011790|hypothetical_protein	26.1904	1.43369	0.37103	3.86408	0.000111506	0.0016894	13	12	15	33	36	24	31	37	35
EA665_011645|GTP_3',8-cyclase_MoaA	110.506	0.786752	0.203667	3.86294	0.000112032	0.00169114	80	78	73	120	127	95	97	165	169
EA665_014470|hypothetical_protein	281.444	0.525946	0.136231	3.8607	0.000113065	0.00170051	221	277	215	288	342	250	345	312	297
EA665_001125|excinuclease_ABC_subunit_UvrA	869.031	-0.341335	0.0886032	-3.8524	0.000116968	0.00175282	1024	1185	1107	753	884	612	736	863	803
CP039343_3935650_3935887	183.018	-0.604528	0.156975	-3.85111	0.000117583	0.00175565	292	241	282	186	163	113	118	148	137
EA665_014820|MarC_family_protein	209.744	-0.57209	0.149077	-3.83754	0.000124275	0.00184887	268	282	293	144	197	145	183	180	236
EA665_014460|sulfate_adenylyltransferase_subunit_CysN	1138.71	0.360852	0.0942829	3.82733	0.000129542	0.00192029	931	1180	980	1089	1333	978	1223	1361	1270
CP039343_2225244_2225396	200.124	0.680603	0.178252	3.8182	0.00013443	0.00198562	165	128	130	221	201	160	195	290	331
EA665_001085|hypothetical_protein	644.495	-0.470906	0.123387	-3.8165	0.000135356	0.0019863	771	997	867	497	600	519	459	662	530
EA665_010755|FadR_family_transcriptional_regulator	117.892	0.694273	0.181921	3.81635	0.000135441	0.0019863	90	91	97	136	132	116	119	123	158
EA665_011610|DMT_family_transporter	30.313	1.25359	0.328635	3.81452	0.000136448	0.00199398	20	20	19	39	49	33	28	35	28
CP039343_2692496_2692728	236.141	-0.540918	0.141956	-3.81047	0.000138705	0.00201868	328	327	365	211	232	160	137	215	194
EA665_011220|hypothetical_protein	152.797	0.621368	0.1631	3.80973	0.000139118	0.00201868	133	115	113	162	193	124	160	206	182
EA665_009685|hypothetical_protein	237.796	-0.525867	0.138557	-3.79531	0.00014746	0.00213222	347	323	282	204	203	160	191	236	237
CP039343_1618193_1618270	46.6062	1.08492	0.286051	3.79276	0.000148983	0.00214671	29	36	21	50	71	37	57	63	59
EA665_007905|FMN-dependent_NADH-azoreductase	59.0488	1.00566	0.266059	3.77986	0.000156919	0.00225318	33	51	51	103	87	45	44	63	56
EA665_008160|catalase_HPII	6423.62	-0.765421	0.202697	-3.77619	0.000159245	0.00227864	8611	10705	9293	3637	6050	4652	4166	6444	5658
EA665_012675|hypothetical_protein	203.271	-0.541627	0.143507	-3.77421	0.000160515	0.00228887	272	270	257	166	168	136	170	199	230
EA665_011315|hypothetical_protein	96.5606	0.720075	0.190972	3.77058	0.000162868	0.00231442	81	79	70	108	118	98	107	104	103
CP039343_187671_187921	81.9369	-1.78103	0.472581	-3.76873	0.000164078	0.0023236	136	281	79	44	49	31	60	48	40
CP039343_1827284_1827396	243.258	-0.569753	0.151265	-3.76658	0.0001655	0.00233571	318	322	362	178	232	169	160	235	262
EA665_008555|hypothetical_protein	1321.04	-0.312221	0.0829217	-3.76525	0.000166383	0.00234015	1563	1768	1539	1162	1275	929	1186	1396	1290
EA665_008780|hypothetical_protein	795.258	-0.410007	0.109011	-3.76114	0.000169143	0.00237087	1050	978	1082	695	756	559	580	751	841
CP039343_1953494_1953730	109.847	-0.767056	0.204413	-3.75247	0.0001751	0.00244606	149	151	152	71	104	55	79	118	141
CP039343_3913330_3913492	240.791	0.697383	0.186118	3.74699	0.000178969	0.00249166	156	189	197	176	318	254	224	363	303
CP039343_301572_301950	277.433	-0.508097	0.135655	-3.74551	0.000180024	0.00249791	371	341	413	257	245	178	223	236	283
EA665_004680|hypothetical_protein	7846.67	-0.310302	0.0829168	-3.74232	0.000182326	0.00252136	9109	10538	9891	6835	7709	5848	6101	7968	7860
CP039343_3934310_3934715	203.922	-0.598163	0.160026	-3.73792	0.000185547	0.00255733	274	287	328	221	164	120	151	175	154
CP039343_508175_508634	17861.3	0.244631	0.0655009	3.73476	0.000187892	0.00258101	16641	17162	17443	17875	19212	14899	19507	19525	19968
EA665_004000|sodium:proton_antiporter	411.172	-0.411049	0.110152	-3.73166	0.000190222	0.00260434	511	573	494	324	397	296	374	418	383
EA665_015610|trehalose-6-phosphate_synthase	1726.36	-1.11992	0.300596	-3.72566	0.000194804	0.00265823	2540	3498	2904	738	1475	1262	841	1509	1199
EA665_001110|BCCT_family_transporter	752.989	-0.339508	0.0911926	-3.72298	0.000196888	0.00267781	953	928	947	681	706	531	701	760	686
EA743_19625|hypothetical_protein	406.328	0.435555	0.117182	3.71689	0.000201687	0.00273405	386	361	360	419	478	384	438	391	451
EA665_011920|hypothetical_protein	25.1057	1.48016	0.399705	3.70313	0.000212955	0.00287733	14	10	10	28	34	20	40	30	41
EA665_016905|phosphate_acetyltransferase	804.997	-0.36263	0.0980472	-3.69853	0.000216852	0.00292041	978	1011	1064	738	746	554	691	884	715
EA665_011900|antitoxin	695.348	0.350524	0.0948491	3.6956	0.000219372	0.00294473	599	665	653	753	787	560	702	772	829
EA665_011425|regulatory_protein_RecX	92.8447	0.771045	0.209145	3.68666	0.00022722	0.00304018	55	80	58	92	103	86	99	140	129
EA665_001185|amino_acid_permease	540.076	0.390213	0.105873	3.68567	0.000228105	0.00304213	473	491	429	512	636	424	584	688	684
EA665_014325|META_domain-containing_protein	1947.35	-0.339528	0.0922483	-3.68058	0.000232699	0.0030934	2348	2483	2453	1901	1807	1251	1826	2049	1744
EA665_010645|amidohydrolase	37.1076	1.13781	0.309305	3.6786	0.00023452	0.00309946	16	31	27	50	55	35	35	39	46
EA665_016060|acyl-CoA_dehydrogenase	175.754	-0.577787	0.157074	-3.67845	0.00023466	0.00309946	243	238	265	126	177	126	118	174	148
CP039343_3256264_3256491	324.081	-0.446247	0.121356	-3.67718	0.00023583	0.00310496	430	431	429	304	309	203	250	311	311
EA665_011820|hypothetical_protein	133.543	0.650527	0.177418	3.66663	0.000245764	0.00322546	94	89	116	133	163	108	164	155	191
EA665_004225|transporter_substrate-binding_domain-containing_protein	429.304	-0.588814	0.160799	-3.6618	0.000250449	0.00327651	596	652	533	244	393	365	399	414	330
EA665_010435|methylenetetrahydrofolate_reductase	108.148	0.738217	0.202371	3.64784	0.000264455	0.0034488	80	65	90	137	120	81	145	122	140
EA665_011535|hypothetical_protein	85.022	0.749203	0.205867	3.63925	0.000273428	0.0035472	58	57	73	100	97	74	99	108	103
CP039343_17805_18198	252.864	0.546061	0.150059	3.63898	0.000273722	0.0035472	220	230	234	260	279	304	254	238	241
EA665_000775|glycoside_hydrolase_family_19	201.95	-0.550212	0.151241	-3.63797	0.000274792	0.00354989	266	279	256	196	163	112	182	193	213
CP039343_1038035_1038435	855.226	0.331176	0.0911528	3.6332	0.000279932	0.003605	719	795	788	803	940	734	995	1035	958
EA665_018560|TonB-dependent_copper_receptor	546.783	0.43037	0.118669	3.62663	0.000287144	0.00368636	463	516	462	521	624	512	663	652	532
EA665_012320|3-oxoacyl-ACP_reductase	151.202	-0.584605	0.161773	-3.61373	0.000301819	0.00386272	181	221	195	128	133	82	143	147	166
EA665_011660|nitrate_reductase	55.4356	0.935879	0.259337	3.60873	0.000307696	0.00392574	38	37	41	63	71	56	44	79	71
EA665_009075|lipid_A_export_permease/ATP-binding_protein_MsbA	740.452	-0.34811	0.0964894	-3.60776	0.000308854	0.00392836	881	939	900	556	727	547	693	771	772
CP039343_1941240_1941306	311.115	-0.456225	0.126681	-3.60137	0.000316545	0.00401379	384	389	378	213	307	202	296	362	334
EA665_011930|hypothetical_protein	35.271	1.23318	0.343076	3.5945	0.000325019	0.00410859	17	19	16	45	28	31	57	48	57
EA665_014830|BCCT_family_transporter	343.271	-0.53944	0.150346	-3.58798	0.000333251	0.00419977	480	522	408	216	312	294	280	327	299
EA665_019275|hypothetical_protein	12.1899	-1.96077	0.547079	-3.58407	0.000338282	NA	22	22	33	4	8	5	9	5	6
EA665_003895|RNA_polymerase_sigma_factor_RpoD	4752.82	-0.235474	0.0658387	-3.57653	0.000348185	0.00436889	5328	5913	5721	4283	4656	3422	4398	4905	4879
EA665_002115|ABC_transporter_substrate-binding_protein	1829.8	-0.347125	0.0970686	-3.57608	0.00034879	0.00436889	2417	2256	2359	1849	1669	1237	1673	1590	1688
EA665_016770|rhodanese-like_domain-containing_protein	1128.64	-0.300259	0.0845296	-3.55212	0.000382144	0.00477217	1266	1470	1457	963	1105	846	1046	1097	1075
EA665_004480|AI-2E_family_transporter	868.449	-0.320097	0.0904088	-3.54055	0.000399296	0.00497129	1027	1152	1096	719	839	682	750	870	804
EA665_008140|hypothetical_protein	7051.95	-0.881258	0.249192	-3.53646	0.000405522	0.00503361	9922	12741	10692	3509	6443	5383	4098	6440	5766
CP039343_2350363_2350554	69.1603	0.823079	0.233074	3.53141	0.000413352	0.00511539	58	44	53	74	96	66	83	86	63
EA665_006835|ATP_phosphoribosyltransferase_regulatory_subunit	2522.22	-0.281471	0.0798605	-3.52454	0.000424226	0.00523424	2947	3127	3050	2012	2470	1935	2481	2534	2505
EA665_011375|amino_acid_permease	24.8113	1.36457	0.387406	3.52232	0.000427789	0.00526244	12	19	12	29	45	22	28	35	22
CP039343_2936558_2936978	16605.4	-0.235324	0.0668463	-3.52037	0.000430944	0.00528548	19763	20346	20018	14532	16580	12640	15016	17415	15454
EA665_008990|transcriptional_regulator	57.1909	1.02466	0.291316	3.51733	0.000435906	0.00533047	34	33	38	86	57	41	97	58	72
CP039343_3908985_3909150	229.376	-0.507745	0.144439	-3.51528	0.000439292	0.00535598	331	256	301	201	192	144	209	236	237
EA665_013440|hypothetical_protein	74.3942	-0.798245	0.227494	-3.50887	0.00045002	0.00547059	116	122	106	47	54	66	48	59	62
EA665_001010|putative_porin	2014.56	-0.300416	0.0858333	-3.5	0.00046526	0.00563922	2335	2605	2603	1715	1904	1601	1652	1956	2038
EA665_011760|hypothetical_protein	596.745	0.358629	0.102557	3.49686	0.000470763	0.00568919	523	542	551	584	631	551	594	726	706
EA665_003910|hypothetical_protein	72.8579	-0.7857	0.22487	-3.49402	0.000475804	0.00573329	112	83	119	53	56	47	67	65	68
CP039343_2596860_2597090	61.4745	0.948381	0.272675	3.47806	0.000505058	0.00606806	48	50	38	77	84	64	45	99	48
EA665_019625|hypothetical_protein	152.627	0.562375	0.161897	3.47366	0.000513406	0.0061188	138	125	133	174	171	154	170	161	146
CP039343_2476050_2476111	23.3396	1.4003	0.403251	3.47252	0.000515598	0.0061188	13	9	16	32	36	19	35	27	23
CP039343_1411574_1411680	21.5205	1.57192	0.45272	3.47216	0.00051629	0.0061188	10	4	15	22	24	27	37	25	27
EA665_011515|TetR/AcrR_family_transcriptional_regulator	166.617	0.575499	0.165749	3.47212	0.000516364	0.0061188	125	125	138	163	175	155	161	236	233
CP039343_2350974_2351233	126.471	0.670616	0.193163	3.47176	0.000517056	0.0061188	113	85	104	169	163	86	128	155	147
CP039343_679528_679653	80.2975	-0.728325	0.209821	-3.47117	0.00051819	0.0061188	99	126	111	51	73	50	67	86	79
EA665_011050|SGNH/GDSL_hydrolase_family_protein	119.703	0.639851	0.184398	3.46995	0.000520556	0.00612918	112	88	89	119	150	117	112	146	148
EA665_005890|hypothetical_protein	1674.76	-0.328527	0.0947029	-3.46902	0.000522352	0.0061328	2162	2018	1997	1481	1608	1144	1418	1642	1885
CP039343_3834046_3834536	18014.6	0.240118	0.0693187	3.46397	0.000532264	0.00623142	16947	17425	17592	17958	19233	15294	19847	19357	19858
EA665_010890|SDR_family_oxidoreductase	52.2383	0.900668	0.260323	3.45981	0.000540553	0.00631053	37	37	33	52	73	47	69	62	62
CP039343_2340597_2340786	119.013	0.629025	0.181853	3.45896	0.000542259	0.00631256	87	101	92	109	151	111	118	156	154
EA665_010685|MBL_fold_metallo-hydrolase	86.7375	-0.703237	0.203573	-3.45448	0.000551365	0.0064005	108	119	144	60	83	53	78	78	77
CP039343_2057366_2057603	58.0447	1.06089	0.308325	3.44082	0.000579944	0.00671334	33	30	26	42	94	28	82	94	107
EA665_009590|DUF937_domain-containing_protein	518.645	-0.386307	0.112381	-3.43748	0.000587144	0.00677764	603	680	665	440	436	393	424	573	537
EA665_009415|hypothetical_protein	90.2925	-0.674571	0.196311	-3.43623	0.000589865	0.00679003	116	135	138	68	75	65	63	85	85
CP039343_2452220_2452435	78.5289	0.749916	0.218568	3.43103	0.000601285	0.00688789	49	55	63	86	96	60	95	94	116
EA665_019120|glycosyltransferase	367.924	0.383192	0.11169	3.43084	0.000601708	0.00688789	315	340	316	374	424	291	425	433	428
EA665_019665|hypothetical_protein	141.853	0.583333	0.170109	3.42917	0.000605425	0.00691124	108	125	123	172	183	106	146	149	177
EA665_009170|DUF1049_domain-containing_protein	964.985	-0.304237	0.0887557	-3.42781	0.000608477	0.00692689	1165	1252	1119	824	893	730	873	961	1009
EA665_003680|IS66-like_element_ISAba25_family_transposase	2007.65	0.287993	0.0842633	3.41778	0.000631351	0.00716749	1874	1738	2001	2132	2145	1608	2114	2290	2347
EA665_004660|hypothetical_protein	2162.26	-0.262971	0.077081	-3.41162	0.000645775	0.0073111	2468	2733	2555	1828	2169	1552	2148	2270	2076
EA665_011225|hypothetical_protein	694.287	0.39398	0.115799	3.40228	0.000668251	0.00754483	644	637	632	795	755	603	580	789	860
EA665_019430|hypothetical_protein	201.435	-0.499372	0.146987	-3.39738	0.000680342	0.00765172	299	262	263	192	165	142	164	170	186
EA665_010385|deoxyguanosinetriphosphate_triphosphohydrolase_family_protein	322.489	0.428196	0.126053	3.39694	0.000681432	0.00765172	284	244	292	305	390	256	372	388	403
EA665_001200|NAD-dependent_succinate-semialdehyde_dehydrogenase	1582.04	0.287394	0.0846721	3.3942	0.000688305	0.00769872	1307	1616	1381	1496	1722	1281	1793	1935	1873
EA665_017730|pyrimidine/purine_nucleoside_phosphorylase	353.02	0.39212	0.115541	3.39378	0.000689354	0.00769872	295	300	328	372	397	273	414	423	409
CP039343_2339046_2339103	5.34887	4.14486	1.22151	3.39323	0.000690746	NA	1	0	1	4	19	8	5	6	3
EA665_015730|iron-sulfur_cluster_carrier_protein_ApbC	347.436	-0.424149	0.125136	-3.3895	0.000700196	0.0077816	405	476	440	254	365	229	340	365	321
EA665_009630|hypothetical_protein	263.244	-0.467754	0.138032	-3.38875	0.000702125	0.0077816	314	365	379	184	255	213	218	238	243
EA665_011260|LysR_family_transcriptional_regulator	276.252	0.454648	0.134193	3.38802	0.000703994	0.0077816	252	245	206	310	288	228	332	326	317
EA665_002120|STAS_domain-containing_protein	599.847	-0.388672	0.114724	-3.38789	0.000704328	0.0077816	687	810	788	610	507	381	552	588	581
EA665_005170|phosphate_ABC_transporter_permease_subunit_PstC	189.795	0.546443	0.161418	3.38528	0.000711067	0.00783505	134	204	140	208	241	152	216	221	208
EA665_006505|alpha/beta_hydrolase	30.5477	1.16756	0.345137	3.3829	0.000717251	0.00788211	15	24	15	31	43	30	32	45	41
EA665_006530|NAD(P)/FAD-dependent_oxidoreductase	20.9126	1.48391	0.439379	3.3773	0.000732024	0.00801116	8	11	9	20	33	15	25	34	36
EA665_006340|gamma-aminobutyraldehyde_dehydrogenase	158.205	-0.541479	0.160344	-3.37697	0.000732882	0.00801116	214	195	226	134	128	111	124	174	146
EA665_010440|NUDIX_domain-containing_protein	68.9758	0.824504	0.244597	3.37087	0.000749306	0.00816903	34	60	50	72	83	63	64	102	98
EA665_004855|excinuclease_ABC_subunit_UvrB	567.019	-0.390875	0.116418	-3.35752	0.00078645	0.00855135	697	795	793	538	522	429	364	538	513
EA665_015710|LysE_family_translocator	284.205	-0.459219	0.137164	-3.34796	0.000814077	0.00882845	371	351	383	276	239	176	283	289	240
CP039343_1940417_1940502	313.72	-0.534166	0.159754	-3.34367	0.000826777	0.00894265	435	415	361	222	341	166	249	340	374
EA665_015620|bacterioferritin	1946.02	-0.278001	0.0832919	-3.33768	0.000844822	0.00909941	2333	2443	2416	1734	1894	1453	1555	2012	1968
EA665_000335|4-hydroxyphenylpyruvate_dioxygenase	268.247	0.478584	0.143401	3.33739	0.000845687	0.00909941	236	214	265	346	275	232	269	283	304
EA665_003530|wax_ester/triacylglycerol_synthase_family_O-acyltransferase	651.329	-0.441829	0.132491	-3.33478	0.000853666	0.00916135	813	996	818	427	691	532	537	608	539
CP039343_3881191_3881265	15.4342	1.66678	0.500134	3.33266	0.000860193	0.00920741	6	8	10	18	26	21	23	15	9
EA665_000485|hypothetical_protein	41.6961	-1.0304	0.310321	-3.32042	0.000898812	0.00959587	73	60	61	36	28	18	36	24	50
EA665_009925|thiolase_family_protein	2108.31	-0.317431	0.0956307	-3.31934	0.000902301	0.00960822	2444	2842	2637	1634	2157	1644	1726	2233	1984
EA665_011310|MarR_family_transcriptional_regulator	65.4064	0.817491	0.246752	3.313	0.000923	0.00978214	38	46	54	80	82	48	61	96	91
CP039343_2342787_2343002	286.867	0.503573	0.152032	3.31228	0.000925389	0.00978214	221	240	230	233	369	241	282	380	419
EA665_011590|sulfurtransferase_complex_subunit_TusD	572.634	0.338472	0.102213	3.31145	0.000928138	0.00978214	506	572	563	632	641	503	505	638	632
CP039343_2400228_2400340	168.189	0.551763	0.166636	3.31119	0.000929016	0.00978214	152	125	130	205	192	119	183	227	198
CP039343_2285664_2285723	15.4681	1.84116	0.556118	3.31074	0.000930502	0.00978214	9	6	5	36	15	11	10	20	27
CP039343_3254459_3254587	223.174	-0.487738	0.147743	-3.30126	0.000962529	0.0100931	289	326	296	177	225	156	172	244	165
EA665_017090|hypothetical_protein	376.56	-0.443127	0.134406	-3.29692	0.000977509	0.0102242	436	551	523	346	383	230	259	362	378
EA665_018255|ThiF_family_adenylyltransferase	53.7224	0.848965	0.25771	3.29427	0.000986785	0.010295	37	43	32	63	69	42	71	68	62
EA665_011775|hypothetical_protein	12.3998	1.93365	0.588856	3.28373	0.00102442	NA	2	7	5	14	20	12	14	25	13
EA665_001680|LemA_family_protein	240.222	-0.473243	0.144299	-3.2796	0.00103955	0.0108182	290	328	345	242	211	144	183	245	222
EA665_018770|threonine_transporter_RhtB	106.109	-0.633424	0.194214	-3.26147	0.00110838	0.0115053	139	142	148	68	97	72	110	118	82
CP039343_881654_882026	171.008	-0.620575	0.190318	-3.26073	0.00111127	0.0115064	235	248	244	88	180	136	155	159	123
CP039343_3058286_3058539	59.1109	-0.815572	0.250458	-3.25632	0.00112868	0.0116574	92	93	90	29	55	49	43	48	43
CP039343_2103979_2104791	176.428	-2.04765	0.629009	-3.25536	0.00113249	0.0116675	330	414	328	32	176	29	86	138	141
CP039343_999338_999523	6.45963	-3.30315	1.01501	-3.2543	0.00113672	NA	10	10	15	0	1	2	9	10	4
CP039343_395260_395404	765.722	0.357546	0.109937	3.2523	0.00114476	0.0117645	692	668	665	726	783	700	963	922	812
CP039343_4009745_4009803	95.0529	0.630264	0.194118	3.24681	0.00116708	0.011964	73	88	70	107	111	88	112	110	99
EA665_006945|hypothetical_protein	1822.7	-0.354276	0.109199	-3.24432	0.00117729	0.0120388	2281	2505	2232	1384	1780	1507	1346	1852	1776
EA665_018480|YgiQ_family_radical_SAM_protein	2009.75	-0.363743	0.112221	-3.2413	0.00118984	0.012137	2394	2798	2425	1381	2011	1645	1757	2081	1893
EA665_002400|M3_family_peptidase	513.372	-0.394585	0.121765	-3.24054	0.00119301	0.0121393	680	592	678	495	464	320	432	489	563
CP039343_2008823_2008894	74.5996	-0.762776	0.235554	-3.23822	0.00120279	0.0122087	123	101	93	65	63	34	53	73	86
EA665_001515|CusA/CzcA_family_heavy_metal_efflux_RND_transporter	109.471	-0.634434	0.196017	-3.23662	0.00120954	0.012247	131	150	177	80	107	67	115	99	82
CP039343_880450_880541	47.5914	-0.947596	0.292958	-3.23458	0.00121824	0.0123048	70	78	73	41	37	21	27	34	61
CP039343_2059732_2059797	449.809	-0.89559	0.276989	-3.23331	0.00122366	0.0123293	619	656	640	207	488	209	395	527	448
EA665_009825|EamA_family_transporter	592.66	-0.450498	0.139433	-3.23092	0.00123392	0.0124024	713	863	751	370	568	505	478	605	570
EA665_008070|hydroxymethylglutaryl-CoA_lyase	754.327	-0.393825	0.122074	-3.22612	0.00125482	0.0125818	864	1061	890	538	734	559	604	878	801
EA665_010085|pyrroloquinoline_quinone_precursor_peptide_PqqA	139.84	-0.527681	0.163794	-3.22162	0.0012747	0.0127501	179	209	165	105	130	94	123	140	141
EA665_007180|hypothetical_protein	98.5167	-0.717603	0.223514	-3.21054	0.00132484	0.0132195	132	158	144	71	83	71	46	112	91
EA665_007150|phage_head_morphogenesis_protein	30.2934	-1.09695	0.341995	-3.2075	0.00133896	0.0133281	48	52	44	15	27	16	17	35	28
EA665_000265|dienelactone_hydrolase_family_protein	413.969	-0.348663	0.108777	-3.2053	0.00134919	0.0133977	485	578	582	387	412	308	320	347	367
EA665_012735|outer_membrane_protein_assembly_factor	924.38	-0.297414	0.0930493	-3.19631	0.00139198	0.0137893	1107	1148	1103	821	837	679	803	938	1025
CP039343_1843784_1844202	39.773	-1.15906	0.36281	-3.19466	0.00139994	0.0138349	83	81	40	41	17	20	17	38	31
EA665_001590|penicillin-binding_protein_PBP3	1040.68	-0.266493	0.0835977	-3.1878	0.00143357	0.0141334	1158	1297	1256	866	1040	742	1020	1095	1061
EA665_016670|hypothetical_protein	24.0713	-1.20884	0.379456	-3.18571	0.00144399	0.0141901	41	43	36	16	20	9	12	26	22
EA665_010960|protocatechuate_3,4-dioxygenase_subunit_alpha	58.6224	0.800171	0.25121	3.18526	0.00144622	0.0141901	34	41	44	61	63	53	85	83	66
EA665_007175|DUF4142_domain-containing_protein	1881.1	-0.711275	0.223377	-3.1842	0.00145157	0.0142088	2601	3136	2724	1092	1910	1411	1061	1764	1619
EA665_017830|serine_hydrolase_family_protein	33.1962	-1.01259	0.318768	-3.17658	0.00149023	0.0145527	52	45	62	25	27	16	20	28	33
EA665_013460|RNA_polymerase_sigma_factor_RpoH	1844.94	-0.251058	0.0791416	-3.17226	0.00151257	0.0147359	2178	2296	2218	1549	1804	1451	1639	1922	1800
CP039343_781616_781974	326.775	-0.422264	0.133671	-3.15897	0.00158327	0.0153884	396	402	474	325	269	219	265	309	337
EA665_011130|potassium_transporter_TrkH	82.7639	0.660862	0.209258	3.15811	0.00158794	0.0153974	55	61	76	96	92	72	97	106	94
CP039343_2352966_2353190	52.3757	1.02597	0.325131	3.15555	0.00160197	0.015497	32	24	39	48	63	54	86	90	35
EA665_015230|septum_site-determining_protein_MinC	1074.8	-0.261644	0.0829968	-3.15246	0.00161904	0.0156254	1166	1305	1291	908	1047	740	1043	1207	1153
EA665_007050|hypothetical_protein	116.885	-0.583541	0.185624	-3.14368	0.00166838	0.016064	154	198	147	86	126	75	84	99	108
EA665_015310|EcsC_family_protein	1193.52	-0.302017	0.0961081	-3.14248	0.00167526	0.0160926	1495	1444	1499	1121	1136	836	936	1221	1246
EA665_011700|acetyl-CoA_carboxylase_biotin_carboxyl_carrier_protein	492.018	-0.403674	0.128955	-3.13035	0.001746	0.0167332	618	620	617	427	447	330	552	512	385
CP039343_316397_316513	513.08	-0.33868	0.10848	-3.12205	0.00179597	0.0171544	597	663	603	408	513	346	449	558	578
CP039343_1125295_1125477	15.9495	-1.53363	0.491286	-3.12167	0.00179828	0.0171544	31	23	36	7	6	13	6	16	9
EA665_009410|AarF/ABC1/UbiB_kinase_family_protein	470.563	-0.349386	0.111953	-3.12084	0.00180337	0.0171632	574	555	620	432	440	309	406	463	519
EA665_011600|DsrH_like_protein	57.0863	0.77053	0.247369	3.1149	0.00184009	0.0174724	39	43	48	59	75	56	73	62	59
CP039343_3240461_3240575	82.5391	-0.669047	0.214905	-3.11322	0.00185056	0.0175314	115	102	119	66	63	52	58	95	91
EA665_000260|HIT_family_protein	315.081	-0.400865	0.128958	-3.10848	0.00188049	0.0177741	386	401	372	216	329	211	312	340	330
EA665_019615|TIGR02594_family_protein	162.305	0.492666	0.158634	3.10568	0.00189839	0.0178792	132	159	131	181	176	150	167	168	203
EA665_010905|acyl-CoA_dehydrogenase	75.2532	0.75855	0.244269	3.10539	0.00190028	0.0178792	43	45	69	60	83	82	85	108	104
EA665_006510|SDR_family_oxidoreductase	73.2598	0.873823	0.283118	3.08643	0.00202577	0.0189962	52	47	50	49	93	89	55	110	115
EA665_010285|SDR_family_NAD(P)-dependent_oxidoreductase	7.35005	2.7502	0.891165	3.08607	0.00202823	NA	5	0	0	10	16	4	8	14	10
EA665_003270|DsbC_family_protein	190.496	-0.490028	0.158798	-3.08585	0.00202969	0.0189962	290	241	227	153	180	131	143	212	172
EA665_012665|GNAT_family_N-acetyltransferase	146.672	-0.534502	0.17324	-3.08533	0.00203329	0.0189962	198	216	170	116	115	112	124	127	165
CP039343_3146417_3146487	798.803	-0.286836	0.0929861	-3.08472	0.00203745	0.0189962	878	1009	934	642	802	544	766	897	863
EA665_000740|pyridoxal_phosphate-dependent_aminotransferase	165.118	-0.560526	0.182551	-3.07051	0.00213693	0.019844	218	227	222	114	165	110	100	190	177
EA665_003890|DUF493_domain-containing_protein	525.385	-0.333846	0.108732	-3.07036	0.00213801	0.019844	625	700	663	480	522	355	404	532	541
EA665_019655|type_II_toxin-antitoxin_system_prevent-host-death_family_antitoxin	306.461	0.393215	0.128503	3.05997	0.0022136	0.0204994	270	287	271	370	334	232	321	373	328
EA665_005625|murein_L,D-transpeptidase	1495.43	-0.246458	0.0805673	-3.05903	0.00222057	0.0205179	1706	1871	1803	1381	1479	1039	1450	1440	1521
EA665_015695|hypothetical_protein	314.172	-0.402695	0.13171	-3.05745	0.0022323	0.0205681	419	376	393	274	286	212	245	366	314
EA665_011550|D-amino_acid_dehydrogenase	1311.87	0.667831	0.218463	3.05695	0.00223599	0.0205681	886	1187	1107	1217	1696	1381	1007	1754	1619
EA665_010765|LysR_family_transcriptional_regulator	76.1207	0.669294	0.219618	3.04754	0.00230727	0.0211765	60	65	54	94	90	61	74	107	86
CP039343_351555_351799	194.83	-0.480707	0.157778	-3.04673	0.00231349	0.0211864	244	249	260	200	158	107	171	198	207
CP039343_2587880_2588429	100.458	-0.603999	0.198659	-3.04039	0.00236274	0.0215894	138	139	164	68	88	90	65	83	82
CP039343_2122601_2122748	9.425	-2.20727	0.726118	-3.03982	0.00236716	NA	10	24	10	2	2	4	7	14	16
EA665_010915|IclR_family_transcriptional_regulator_PcaU	44.7552	0.824976	0.272068	3.03225	0.00242741	0.0221314	33	34	32	49	62	40	44	56	55
EA665_014490|SRPBCC_domain-containing_protein	127.485	-0.628165	0.207552	-3.02654	0.00247368	0.0225034	198	184	146	93	108	91	72	148	133
CP039343_797439_797586	1835.46	-0.239523	0.0792106	-3.02387	0.00249562	0.022653	2061	2101	2046	1632	1678	1210	2031	2030	2040
EA665_017575|hypothetical_protein	381.665	-0.343694	0.113703	-3.02273	0.00250503	0.0226884	475	536	463	348	360	286	293	366	365
EA665_004160|BapA_prefix-like_domain-containing_protein	682.176	-0.298794	0.098983	-3.01864	0.00253912	0.0229468	821	765	859	555	638	508	686	742	667
EA665_003200|RtcB_family_protein	141.401	-0.518976	0.172197	-3.01386	0.00257947	0.0232604	206	204	161	99	135	107	125	122	136
EA665_010965|protocatechuate_3,4-dioxygenase_subunit_beta	56.4308	0.829559	0.276265	3.00277	0.00267534	0.0240722	33	47	33	76	53	43	79	60	87
EA665_019825|hypothetical_protein	73.1058	0.658034	0.219316	3.00039	0.00269632	0.0242081	65	56	59	70	96	77	71	80	84
EA665_000680|hypothetical_protein	3533.72	-0.302245	0.1008	-2.99846	0.00271349	0.0243093	4287	4591	4333	2713	3385	2997	2843	3673	3438
EA665_001975|peptidase_S8	47.8577	-0.808228	0.269882	-2.99475	0.0027467	0.0245535	65	89	76	27	47	38	26	36	36
CP039343_3799054_3799165	3.26961	-4.24379	1.41763	-2.99358	0.00275729	NA	6	11	7	0	0	1	3	2	1
EA665_011615|PLP-dependent_aminotransferase_family_protein	67.3642	0.736379	0.246147	2.99162	0.002775	0.0247528	35	76	53	76	88	69	65	81	64
EA665_011285|hypothetical_protein	58.2827	0.716824	0.239704	2.99046	0.0027856	0.0247936	41	45	49	63	78	50	63	67	72
EA665_011970|sperm-activating_peptide	7.12314	2.2461	0.753064	2.98261	0.00285801	NA	2	2	4	7	12	13	6	8	8
EA665_011990|hypothetical_protein	6.61845	3.62345	1.21497	2.98233	0.00286062	NA	0	0	2	9	12	1	15	10	12
EA665_016340|organic_hydroperoxide_resistance_protein	43.3757	0.859911	0.288367	2.98201	0.00286367	0.0254336	26	39	30	56	54	38	58	50	40
EA665_001970|hypothetical_protein	23.7203	-1.10443	0.370948	-2.97733	0.00290773	0.0257694	32	46	47	12	24	14	15	16	14
EA665_019390|hypothetical_protein	77.1963	-0.642179	0.216338	-2.9684	0.00299353	0.0264728	114	119	105	78	55	52	52	64	69
EA665_012030|hypothetical_protein	60.0202	0.748413	0.252675	2.96196	0.00305689	0.0269753	51	36	39	61	70	51	61	84	92
EA665_011870|hypothetical_protein	21.5143	1.19266	0.404012	2.95204	0.00315682	0.0277976	15	10	14	31	22	23	26	25	26
EA665_015790|hypothetical_protein	643.228	-0.332989	0.11287	-2.9502	0.00317567	0.027904	817	800	874	667	585	446	495	560	641
CP039343_2092757_2092832	41.1038	-0.87078	0.296109	-2.94074	0.0032743	0.0287093	53	63	59	24	41	18	43	34	47
CP039343_1697583_1697667	131.396	-0.545466	0.185668	-2.93786	0.00330491	0.0289162	176	194	215	86	131	123	85	87	100
EA665_004575|Tol-Pal_system_beta_propeller_repeat_protein_TolB	845.168	-0.253699	0.0867131	-2.92573	0.00343647	0.0300036	958	1036	1065	768	809	621	766	843	865
EA665_010595|SLC13_family_permease	4.00434	4.30332	1.47104	2.92535	0.00344068	NA	0	0	0	2	2	5	10	14	3
EA665_001570|DUF4179_domain-containing_protein	1204.1	-0.250327	0.0856984	-2.92103	0.0034888	0.0303961	1428	1442	1398	1039	1130	901	1080	1271	1327
EA665_000865|alpha/beta_hydrolase	119.228	-0.49831	0.170877	-2.91619	0.00354331	0.0308059	165	165	161	97	121	81	90	117	98
CP039343_1936071_1936123	297.249	-0.389215	0.13379	-2.90915	0.0036241	0.0314419	392	368	348	250	293	187	252	293	350
CP039343_2949742_2950044	29.3284	-0.997873	0.343507	-2.90496	0.00367302	0.0317994	42	53	41	13	24	21	21	32	24
CP039343_3285723_3286556	10.255	1.86541	0.643238	2.90003	0.00373123	NA	5	9	0	16	12	15	11	14	8
EA665_011125|TrkA_family_potassium_uptake_protein	103.25	0.578319	0.199486	2.89904	0.00374302	0.0323375	79	77	86	107	128	77	131	106	148
EA665_003925|citrate_(Si)-synthase	6125.61	-0.214053	0.0739521	-2.89448	0.00379791	0.0326534	6878	7179	7321	5893	5677	4252	6052	6565	6247
CP039343_2377632_2377746	28.3429	1.06075	0.366522	2.89411	0.00380241	0.0326534	18	19	11	22	38	26	39	43	41
EA665_002510|lytic_transglycosylase	397.034	-0.323474	0.111773	-2.89403	0.00380336	0.0326534	463	482	494	351	344	288	358	414	442
EA665_019175|outer_membrane_protein	1215.98	-0.236125	0.0816252	-2.8928	0.00381823	0.0327129	1348	1550	1453	1127	1157	881	1167	1232	1208
EA665_000975|TonB-dependent_siderophore_receptor	174.393	0.523711	0.181195	2.89031	0.00384858	0.0328569	148	135	168	233	178	145	222	187	158
EA665_003960|2-oxoglutarate_dehydrogenase_E1_component	13217.1	-0.21526	0.0744813	-2.89012	0.00385098	0.0328569	14613	15739	15671	12124	12098	9680	13986	13526	13355
EA665_004925|UDP-N-acetylglucosamine_2-epimerase_(non-hydrolyzing)	193.971	-0.43575	0.150877	-2.88811	0.00387566	0.0329992	230	261	267	144	193	143	145	211	187
EA665_015700|hypothetical_protein	59.2176	-0.750706	0.260026	-2.88704	0.00388885	0.0330432	85	74	80	35	44	42	40	70	76
EA665_012985|tRNA_uridine-5-carboxymethylaminomethyl(34)_synthesis_enzyme_MnmG	3939.41	-0.24347	0.0848979	-2.8678	0.00413338	0.0350487	4338	5029	4693	3081	4003	3066	3768	4168	3883
CP039343_1078523_1078663	158.4	0.47116	0.164894	2.85736	0.00427186	0.0361486	118	135	132	177	167	115	177	238	186
EA665_019620|hypothetical_protein	108.232	0.521915	0.18338	2.84609	0.00442596	0.0373757	77	107	92	121	122	96	115	121	129
EA665_013805|acyl-CoA_dehydrogenase	112.815	-0.525545	0.184713	-2.84519	0.00443847	0.0374048	169	179	145	109	100	84	72	103	71
EA665_013820|adenosylhomocysteinase	4544.88	-0.196881	0.0692142	-2.84452	0.0044479	0.0374078	5165	5471	5386	4140	4475	3369	4514	4666	4343
EA665_012730|DUF490_domain-containing_protein	2107.41	-0.309566	0.108948	-2.84141	0.00449148	0.0376973	2351	2762	2550	1524	2103	1648	1745	2406	2224
EA665_012640|tRNA_(adenosine(37)-N6)-dimethylallyltransferase_MiaA	767.851	-0.276221	0.0972503	-2.84031	0.00450695	0.0377503	990	920	917	656	746	596	684	811	694
EA665_001635|hypothetical_protein	11.4579	1.63678	0.576308	2.84011	0.00450975	NA	6	9	2	13	17	15	9	16	15
EA665_019725|hypothetical_protein	33.8736	0.880128	0.310358	2.83585	0.00457042	0.0381855	21	29	28	46	50	28	34	34	36
CP039343_3113076_3113239	157.314	-0.436163	0.15383	-2.83536	0.00457744	0.0381855	212	196	220	144	149	106	119	150	147
CP039343_2009059_2009501	81.6474	-0.600311	0.212331	-2.82724	0.00469515	0.0390883	112	111	104	66	81	40	67	94	81
EA665_003655|patatin-like_phospholipase_family_protein	266.073	-0.398713	0.141156	-2.82462	0.0047337	0.0392534	337	381	305	215	225	219	262	235	248
EA665_010360|DUF2075_domain-containing_protein	18.9366	1.20744	0.427475	2.8246	0.00473403	0.0392534	15	9	10	24	28	16	20	25	24
EA665_015575|23S_rRNA_pseudouridine(2605)_synthase_RluB	1320.78	-0.234571	0.0831964	-2.81949	0.00481006	0.0398037	1495	1613	1568	1080	1382	954	1269	1387	1349
EA665_011360|SulP_family_inorganic_anion_transporter	58.4567	0.678814	0.241988	2.80515	0.00502926	0.0415342	41	53	42	61	75	51	61	69	77
EA665_011865|hypothetical_protein	22.039	1.0905	0.389374	2.80065	0.00509999	0.0420341	16	15	14	35	31	17	20	26	25
EA665_011160|DUF1449_family_protein	50.6054	0.758281	0.271065	2.79741	0.00515138	0.0423729	44	36	33	72	50	42	55	64	61
EA665_003990|DUF808_domain-containing_protein	355.454	-0.335767	0.12009	-2.79597	0.00517448	0.0424782	382	479	457	335	325	236	312	380	357
CP039343_2345778_2346005	71.3762	0.638024	0.228424	2.79315	0.0052197	0.0427642	53	60	47	80	85	50	80	91	105
CP039343_2368502_2368748	51.5869	0.760074	0.272259	2.79173	0.00524274	0.0428677	42	43	24	53	64	42	69	71	60
EA665_012670|rRNA_pseudouridine_synthase	294.832	-0.3722	0.133363	-2.79088	0.00525642	0.0428945	367	418	353	242	253	251	240	299	267
CP039343_1972767_1972871	42.9123	-0.863394	0.30962	-2.78856	0.00529431	0.0431183	69	54	68	21	46	24	25	39	52
CP039343_3373197_3373256	2.47195	4.50257	1.61634	2.78566	0.00534188	NA	0	0	0	0	8	3	6	1	4
CP039343_2021942_2022099	87.58	-0.573544	0.206064	-2.78333	0.00538042	0.0437332	110	95	107	54	73	53	89	116	112
EA665_011895|type_II_toxin-antitoxin_system_RelE/ParE_family_toxin	472.767	0.319553	0.115181	2.77435	0.00553116	0.0448699	409	431	449	408	552	417	472	578	582
EA665_001330|hypothetical_protein	246.183	-0.41794	0.150975	-2.76828	0.00563531	0.0456249	260	385	361	194	260	190	168	222	217
EA665_017495|hypothetical_protein	232.036	-0.379661	0.137286	-2.76548	0.00568396	0.0459286	304	286	273	217	203	150	204	258	235
EA665_001885|superoxide_dismutase	478.232	-0.289665	0.104853	-2.7626	0.00573436	0.0462452	556	637	575	407	496	340	408	497	468
EA665_018620|DUF2846_domain-containing_protein	43.6088	-0.807626	0.292527	-2.76086	0.00576501	0.0464015	81	65	45	27	40	27	35	40	42
EA665_013555|penicillin-binding_protein_1B	1660.11	-0.25641	0.0931028	-2.75405	0.00588621	0.0472848	1964	2176	1900	1406	1729	1210	1399	1860	1566
EA665_010840|SDR_family_oxidoreductase	9.75736	1.77509	0.644895	2.75253	0.00591366	NA	3	3	6	12	12	11	16	16	8
EA665_001965|hypothetical_protein	633.871	-0.286748	0.104181	-2.7524	0.00591603	0.0474318	754	767	831	605	617	436	530	589	677
EA665_005250|LysR_family_transcriptional_regulator	417.586	-0.291817	0.106145	-2.74924	0.00597343	0.047799	477	526	502	357	422	279	401	437	431
CP039343_1485679_1486062	32.8203	-0.941429	0.342945	-2.74513	0.00604871	0.0483076	44	53	50	16	39	12	24	33	36
CP039343_2392970_2393055	781.017	0.618221	0.225662	2.73958	0.00615173	0.0490353	555	635	577	1001	939	436	1025	950	1020
EA665_003970|dihydrolipoyl_dehydrogenase	7616.2	-0.189799	0.0693471	-2.73694	0.00620127	0.0493348	8364	8648	8566	6661	7083	5465	8398	8233	8254
EA665_019125|glycosyltransferase_family_4_protein	205.767	0.382961	0.140318	2.72923	0.00634832	0.0504074	190	175	168	200	230	167	247	251	242
EA665_014895|type_VI_secretion_system_tip_protein_VgrG	955.234	-0.232106	0.0850671	-2.7285	0.00636223	0.0504206	1127	1128	1094	809	944	694	964	1001	979
CP039343_3614302_3614548	85.0974	-0.565458	0.207291	-2.72785	0.00637483	0.0504235	110	125	117	88	65	51	75	82	69
CP039343_542570_542628	106.038	0.550276	0.201873	2.72585	0.00641361	0.0506115	97	86	85	124	149	69	123	109	124
EA665_011005|2-C-methyl-D-erythritol_4-phosphate_cytidylyltransferase	177.43	0.424021	0.155583	2.72536	0.00642315	0.0506115	154	135	170	175	183	167	183	221	218
EA665_016075|adenosine_deaminase	39.8068	-0.811754	0.298028	-2.72375	0.00645451	0.0507615	53	66	57	37	35	15	30	34	43
EA665_012040|hypothetical_protein	101.375	0.509891	0.187567	2.71845	0.00655889	0.0514842	87	82	87	116	113	84	100	130	121
EA665_009975|GntP_family_permease	88.7098	-0.596626	0.219575	-2.71718	0.006584	0.051583	138	115	114	91	62	55	69	72	98
EA665_005155|alpha-keto_acid_decarboxylase_family_protein	433.433	0.7821	0.287968	2.71593	0.00660901	0.0516692	381	247	361	705	457	314	459	495	498
EA665_011290|alpha/beta_fold_hydrolase	30.3325	0.960963	0.353897	2.71538	0.00662007	0.0516692	19	17	22	44	36	18	40	35	45
EA665_016755|Bax_inhibitor-1/YccA_family_protein	1109.89	-0.221623	0.0816698	-2.71364	0.00665479	0.0517687	1270	1386	1321	1043	1080	803	990	1151	1110
EA665_013975|KilA-N_domain-containing_protein	48.5791	0.709174	0.261352	2.71349	0.00665796	0.0517687	46	39	33	53	67	46	49	52	53
EA665_019130|EpsG_family_protein	49.479	0.839213	0.309496	2.71155	0.00669702	0.0519065	61	32	22	72	62	44	54	53	44
EA665_016700|acetolactate_synthase_small_subunit	1139.37	0.24807	0.0914929	2.71136	0.00670087	0.0519065	1155	1023	1048	1172	1183	930	1183	1307	1354
EA665_017180|aspartate-semialdehyde_dehydrogenase	965.128	0.262557	0.0968932	2.70976	0.00673329	0.0520598	912	930	875	1055	1025	725	1069	1183	1013
EA665_009705|MoxR_family_ATPase	637.62	-0.274234	0.101257	-2.70829	0.00676318	0.052193	721	760	797	515	608	487	599	733	615
EA665_002995|YdiU_family_protein	184.531	-0.385249	0.14235	-2.70636	0.00680256	0.0523988	214	255	232	158	173	129	159	187	186
EA665_004960|peptidylprolyl_isomerase	3565.79	-0.209067	0.0772841	-2.70517	0.00682695	0.0524885	4073	4455	4245	2939	3728	2794	3283	3588	3472
CP039343_3960912_3960994	18.5917	1.20632	0.446322	2.70281	0.00687567	0.0527647	18	13	8	33	17	26	16	19	13
EA665_009200|malate_synthase_G	1664.5	-0.279191	0.103383	-2.70055	0.00692251	0.0530254	1944	1906	2133	1692	1486	1067	1469	1784	1786
EA665_013800|lipoyl_synthase	1415.76	0.211028	0.0781946	2.69875	0.00696008	0.0532143	1278	1425	1426	1430	1552	1121	1501	1614	1540
EA665_007205|LPS_export_ABC_transporter_periplasmic_protein_LptC	300.337	-0.330378	0.12268	-2.693	0.00708123	0.0540403	335	386	389	288	273	197	281	305	301
EA665_016705|acetolactate_synthase_3_large_subunit	1360.27	0.22198	0.0825156	2.69015	0.00714192	0.0544027	1296	1330	1307	1455	1393	1084	1431	1545	1528
EA665_014890|DUF4123_domain-containing_protein	304.554	-0.317167	0.118109	-2.68537	0.00724502	0.0550862	351	394	355	261	290	207	282	329	326
CP039343_3838880_3838952	98.7499	0.565319	0.210622	2.68405	0.00727372	0.0552026	78	92	79	108	120	88	139	100	87
EA665_011640|MoaD/ThiS_family_protein	62.6889	0.637473	0.237755	2.68122	0.00733546	0.0555688	38	54	50	64	77	49	70	83	86
EA665_019260|HAD_family_hydrolase	251.711	-0.363782	0.136547	-2.66415	0.0077184	0.0583624	309	294	315	229	193	186	235	281	261
EA665_009830|AraC_family_transcriptional_regulator	189.923	-0.388382	0.145906	-2.66187	0.00777081	0.0586381	207	253	240	144	180	134	170	217	200
EA665_016840|phosphatase_PAP2_family_protein	59.1205	-0.668468	0.251178	-2.66133	0.00778331	0.0586381	91	83	79	39	59	39	35	54	66
CP039343_222802_222985	216.146	-0.431852	0.162878	-2.65138	0.00801636	0.0602836	302	243	279	204	203	122	169	212	256
EA665_018555|hypothetical_protein	121.401	0.481529	0.181739	2.64956	0.00805961	0.0604984	93	109	95	116	129	109	148	175	127
EA665_014310|Lon_protease	5262	-0.253456	0.0958047	-2.64555	0.0081559	0.06111	6290	7258	6893	4348	5865	4444	3654	4780	4473
EA665_017800|CHAP_domain-containing_protein	136.786	0.618121	0.234699	2.63368	0.00844653	0.0631026	122	105	106	229	115	96	150	132	182
CP039343_206332_206531	215.322	-0.51438	0.195326	-2.63344	0.00845247	0.0631026	247	283	263	140	250	97	172	275	276
CP039341_2059231_2059301	7.51321	1.93177	0.73694	2.62135	0.00875835	NA	3	7	1	10	21	6	4	11	5
EA665_015215|outer_membrane_protein	1699.31	-0.215292	0.0823454	-2.6145	0.00893574	0.0665898	1998	2149	2121	1721	1686	1231	1395	1594	1635
CP039343_1397733_1397787	5.97229	3.15252	1.20759	2.61059	0.00903875	NA	1	1	0	5	4	6	11	13	13
EA665_018925|amino_acid_permease	543.834	0.747947	0.286772	2.60816	0.00910297	0.0677054	346	463	392	381	708	615	519	860	627
CP039343_130135_130247	1670.04	-0.278688	0.10689	-2.60725	0.0091273	0.0677054	1954	2135	2062	1296	1563	1439	1342	1741	1707
EA665_002055|acyl-CoA_dehydrogenase	290.077	-0.320462	0.122925	-2.60697	0.00913473	0.0677054	348	361	363	231	290	215	251	288	310
EA665_001055|acetate--CoA_ligase	260.879	-0.372912	0.143482	-2.59901	0.00934922	0.0691708	335	295	356	269	233	155	235	255	262
EA665_009165|integration_host_factor_subunit_beta	636.342	-0.250018	0.0962354	-2.59799	0.00937716	0.0692532	749	824	728	561	598	494	568	651	641
CP039343_418361_418614	223.861	-0.377615	0.145565	-2.59414	0.00948282	0.0699083	264	305	271	224	201	132	192	226	244
EA665_005190|BapA_prefix-like_domain-containing_protein	318.285	0.318207	0.122775	2.59178	0.00954815	0.0702641	299	304	314	315	396	272	283	380	329
EA665_001620|penicillin-binding_protein_PBP1a	1331.45	-0.209615	0.0809028	-2.59094	0.00957132	0.0703091	1548	1607	1510	1146	1295	1012	1244	1468	1343
EA665_007560|hypothetical_protein	12.33	-1.40729	0.543434	-2.58962	0.00960814	NA	21	18	20	4	8	7	6	16	15
CP039343_3330153_3330289	38.5554	-0.816279	0.315599	-2.58644	0.00969728	0.0709935	51	55	50	36	22	18	34	35	56
EA665_019740|3'-5'_exonuclease	22.0074	1.00193	0.387388	2.58638	0.00969894	0.0709935	16	12	22	29	33	24	14	22	25
CP039343_2921832_2922494	630.062	-0.303178	0.117596	-2.57814	0.00993348	0.0725814	787	749	682	466	671	416	591	685	744
EA665_017895|DNA_transfer_protein_p32	74.2646	-0.575544	0.223416	-2.57611	0.00999187	0.0728787	92	117	105	76	68	38	51	73	66
EA665_008995|TetR/AcrR_family_transcriptional_regulator	453.154	-0.288868	0.112253	-2.57337	0.0100713	0.0733283	529	560	553	378	458	319	383	458	518
EA665_015155|ferric_iron_uptake_transcriptional_regulator	1318.63	-0.222455	0.0867121	-2.56545	0.0103043	0.0748922	1550	1487	1557	1241	1268	882	1356	1388	1347
EA665_011755|PAAR_domain-containing_protein	617.394	0.25051	0.0977766	2.56206	0.0104052	0.0754929	595	595	572	642	677	483	610	713	734
EA665_001985|hypothetical_protein	107.944	-0.465551	0.181854	-2.56003	0.0104663	0.0757074	147	141	147	104	105	63	83	100	103
EA665_012720|hypothetical_protein	243.086	-0.348048	0.135964	-2.55986	0.0104715	0.0757074	290	296	294	193	224	175	205	294	260
CP039343_57500_57685	206.605	-0.386401	0.151015	-2.5587	0.0105064	0.0758263	255	247	256	153	219	129	178	220	246
EA665_010770|muconate_cycloisomerase	35.326	0.777883	0.304397	2.55549	0.010604	0.0763968	24	29	29	43	41	36	43	37	35
EA665_011015|DUF421_domain-containing_protein	59.6227	0.64669	0.253324	2.55282	0.0106854	0.076849	44	41	42	55	69	47	68	106	72
EA665_010920|MBL_fold_metallo-hydrolase	57.3295	0.639644	0.250739	2.55103	0.0107404	0.0771102	40	39	51	56	76	43	71	68	78
EA665_016440|NADAR_family_protein	77.6717	-0.535012	0.209774	-2.55042	0.0107592	0.0771107	83	110	110	61	67	51	71	82	80
EA665_010945|carbohydrate_porin	28.8453	0.921594	0.361451	2.54971	0.0107813	0.0771353	18	14	22	35	31	22	33	35	52
EA665_012415|hypothetical_protein	114.553	-0.462934	0.18165	-2.54849	0.010819	0.0772702	167	165	157	110	102	91	69	108	77
EA665_001510|efflux_RND_transporter_periplasmic_adaptor_subunit	38.7717	-0.766976	0.30114	-2.54691	0.0108681	0.0774074	51	51	65	22	28	33	32	33	40
EA665_011850|hypothetical_protein	14.0509	1.41822	0.55707	2.54586	0.0109008	0.0774074	9	6	4	7	24	13	16	26	23
EA665_003265|sel1_repeat_family_protein	171.666	-0.416144	0.163468	-2.54572	0.0109054	0.0774074	192	204	241	160	133	115	191	179	158
EA665_018980|SDR_family_NAD(P)-dependent_oxidoreductase	38.4373	-0.756084	0.297032	-2.54546	0.0109133	0.0774074	60	58	43	34	28	20	34	41	37
CP039343_1954009_1954223	32.5803	-0.858509	0.337827	-2.54126	0.0110452	0.0782087	43	55	45	18	32	18	19	44	29
EA665_000380|histidine_utilization_repressor	160.992	0.429302	0.169053	2.53946	0.0111024	0.0784097	140	145	167	167	205	150	134	209	141
EA665_018175|LPS_export_ABC_transporter_permease_LptG	479.646	-0.260605	0.102634	-2.53917	0.0111117	0.0784097	536	617	543	403	457	352	476	512	495
EA665_010070|Fur_family_transcriptional_regulator	10.2865	-1.53406	0.605365	-2.53411	0.0112735	NA	10	19	18	7	5	2	10	14	12
EA665_000575|hypothetical_protein	44.2571	0.721859	0.284879	2.53392	0.0112795	0.0794576	29	45	32	59	47	43	38	59	47
CP039343_2276945_2277033	5.80938	2.50506	0.988747	2.53357	0.0112907	NA	1	1	2	3	7	9	15	7	6
EA665_007210|lipopolysaccharide_transport_periplasmic_protein_LptA	367.323	-0.286325	0.1134	-2.5249	0.011573	0.0812758	429	432	469	330	326	276	335	398	364
EA665_011840|hypothetical_protein	22.4894	1.09546	0.433883	2.52478	0.011577	0.0812758	14	20	9	14	29	34	20	31	29
EA665_002770|acyl-CoA_thioesterase	106.528	0.461102	0.183263	2.51607	0.0118673	0.0831721	82	96	102	103	123	103	115	123	116
CP039343_1484506_1485085	652.48	-0.624341	0.248242	-2.51505	0.0119017	0.0832716	918	1040	928	375	667	548	364	560	582
CP039343_65857_66186	810.919	0.234445	0.0933047	2.51269	0.0119816	0.0836885	788	774	826	798	901	706	876	839	845
EA665_011750|hypothetical_protein	3.63001	3.245	1.29509	2.50561	0.0122239	NA	0	2	0	7	4	5	2	6	6
CP039343_919397_919661	2.28586	3.86996	1.54609	2.50306	0.0123125	NA	0	1	0	4	3	6	2	3	0
EA665_018900|AMP-binding_protein	358.383	0.317256	0.126777	2.50247	0.0123329	0.0859965	349	268	320	337	371	293	393	471	459
EA665_019765|RepB_family_plasmid_replication_initiator_protein	313.008	0.354303	0.141851	2.49772	0.0124995	0.0870108	300	276	269	385	345	206	344	373	356
EA665_008875|FxsA_family_protein	308.675	-0.378984	0.151962	-2.49394	0.0126335	0.0877953	361	400	451	319	280	202	204	279	337
CP039343_3433978_3434308	9.30041	-1.50543	0.603731	-2.49355	0.0126474	NA	16	14	16	5	6	3	9	10	8
EA665_010150|phospholipase_D_family_protein	40.5257	-0.717663	0.287888	-2.49286	0.0126719	0.0879141	68	55	49	26	38	26	37	40	34
EA665_019685|hypothetical_protein	7.79321	1.8611	0.746952	2.49159	0.0127173	NA	4	4	2	8	7	15	15	5	7
CP039343_234551_234847	76.4478	-0.618524	0.248758	-2.48645	0.0129025	0.0892766	113	101	93	69	77	29	55	76	97
EA665_001685|TPM_domain-containing_protein	186.579	-0.410056	0.164933	-2.4862	0.0129116	0.0892766	193	296	230	174	175	116	146	192	196
EA665_010345|YciI_family_protein	5.66864	2.44227	0.982384	2.48607	0.0129163	NA	1	5	0	9	2	15	9	2	4
EA665_011075|3-deoxy-7-phosphoheptulonate_synthase	1182.72	0.245581	0.0990849	2.47849	0.0131939	0.0910755	1200	1156	1036	1098	1327	1020	1112	1438	1365
CP039343_882521_882610	2.77955	-3.67681	1.485	-2.47596	0.0132877	NA	10	4	2	0	0	1	3	2	4
EA665_011080|YnfA_family_protein	59.1141	0.689836	0.279072	2.47189	0.0134399	0.0926187	37	39	50	40	89	47	60	97	82
EA665_010990|3-oxoadipyl-CoA_thiolase	34.9683	0.784474	0.317494	2.47083	0.01348	0.0927395	23	24	36	33	49	40	32	45	32
CP039343_441126_441205	32.3423	-0.798178	0.323389	-2.46817	0.0135806	0.0932762	45	52	46	24	23	23	19	39	27
CP039343_2958784_2959020	34.3133	0.837832	0.339586	2.46722	0.0136168	0.0933688	32	24	21	37	51	31	38	53	23
CP039343_2479230_2479293	20.5886	1.04762	0.425546	2.46183	0.0138229	0.0945689	15	13	8	17	28	19	33	28	25
CP039343_2864357_2864578	757.857	-0.224182	0.091077	-2.46145	0.0138377	0.0945689	841	927	894	655	777	528	770	789	761
EA665_005845|hypothetical_protein	9.42414	1.6352	0.666205	2.45449	0.0141084	NA	10	4	0	13	11	13	10	13	9
EA665_003835|outer_membrane_lipoprotein_chaperone_LolA	246.795	-0.327459	0.133519	-2.45252	0.0141858	0.0967879	320	316	302	247	226	169	196	237	247
EA665_002150|NAD-dependent_epimerase/dehydratase_family_protein	116.09	-0.456701	0.186584	-2.4477	0.0143771	0.0978197	138	156	153	117	83	78	99	130	111
EA665_017040|peptide-methionine_(S)-S-oxide_reductase	676.676	0.233682	0.0954928	2.44711	0.0144005	0.0978197	670	682	625	664	792	544	686	726	767
EA743_08205|hypothetical_protein	1827.7	-0.630094	0.257584	-2.44617	0.0144384	0.0978197	2309	2947	2664	1027	1720	1568	1085	1853	1592
EA665_008410|cytochrome_d_ubiquinol_oxidase_subunit_II	166.234	-0.389831	0.159376	-2.44598	0.0144461	0.0978197	223	221	197	160	148	112	152	179	131
EA665_002705|OmpA_family_protein	506.733	-0.24409	0.0998022	-2.44573	0.0144558	0.0978197	585	616	585	458	480	356	500	513	546
EA665_018380|PLP-dependent_aminotransferase_family_protein	19.1355	-1.03777	0.424692	-2.44358	0.0145425	0.0982454	22	44	27	10	19	10	16	16	14
EA665_005030|insulinase_family_protein	440.261	-0.258534	0.10584	-2.44269	0.0145782	0.0983255	492	570	522	368	453	316	418	445	449
EA665_003320|response_regulator	31.8442	0.829373	0.340051	2.43897	0.0147294	0.0991827	28	16	23	43	37	23	36	48	35
EA665_016600|Re/Si-specific_NAD(P)(+)_transhydrogenase_subunit_alpha	229.402	-0.457375	0.187879	-2.43441	0.014916	0.100275	275	271	340	266	182	111	236	202	228
EA665_010355|hypothetical_protein	294.334	-0.301133	0.12376	-2.4332	0.0149662	0.100343	344	383	330	265	282	191	304	295	306
EA665_009035|LPS-assembly_protein_LptD	1346.77	-0.204216	0.0839363	-2.43299	0.0149747	0.100343	1542	1533	1597	1291	1267	927	1349	1441	1379
EA665_009080|tetraacyldisaccharide_4'-kinase	217.583	-0.351181	0.14447	-2.43083	0.0150645	0.10078	261	282	278	157	219	174	216	195	206
EA665_006195|LysM_peptidoglycan-binding_domain-containing_protein	3371.06	-0.179932	0.0741742	-2.4258	0.0152747	0.102021	3678	4040	4163	3257	3326	2423	3084	3416	3442
EA665_008685|LLM_class_flavin-dependent_oxidoreductase	4.42714	2.28661	0.942809	2.42531	0.0152952	NA	1	2	2	5	10	6	6	4	3
CP039343_669415_669736	7.02944	2.1225	0.875227	2.42509	0.0153047	NA	0	3	4	12	13	2	15	3	12
EA665_012440|hypothetical_protein	29.0637	-0.872102	0.360286	-2.42058	0.0154958	0.102941	42	40	44	20	29	11	24	42	19
CP039343_2503395_2503469	17.6881	-1.07486	0.44406	-2.42053	0.0154981	0.102941	24	24	21	9	10	9	25	22	20
EA665_011570|hypothetical_protein	34.7125	0.796383	0.329091	2.41995	0.0155226	0.102941	33	22	22	53	40	23	36	44	42
CP039343_1788500_1788966	261.995	-0.408279	0.168728	-2.41974	0.0155314	0.102941	316	340	357	300	211	147	210	232	295
EA665_015675|hypothetical_protein	33.7056	-0.761062	0.314539	-2.41961	0.0155373	0.102941	54	44	45	31	27	15	28	36	32
CP039343_1715576_1715664	1.43834	4.12194	1.70567	2.4166	0.015666	NA	0	0	0	4	1	3	2	1	1
EA665_013445|ATP-dependent_RNA_helicase_RhlB	1575.95	-0.259847	0.107528	-2.41655	0.0156683	0.103642	1858	1949	1794	1113	1577	1295	1485	1740	1591
EA665_001625|pilus_assembly_protein_PilM	53.9604	0.612961	0.253936	2.41384	0.0157855	0.10425	47	46	40	60	56	57	53	56	70
CP039343_899013_899132	7.98284	-1.80416	0.748187	-2.41138	0.0158922	NA	9	15	8	4	4	0	9	13	14
CP039343_3298492_3298858	246.379	-0.345343	0.143248	-2.41081	0.0159172	0.104952	309	349	285	178	254	202	229	222	222
EA665_006515|NAD(P)/FAD-dependent_oxidoreductase	134.103	0.871024	0.361643	2.40852	0.0160174	0.105444	101	73	111	94	181	166	103	187	189
EA665_010950|3-dehydroshikimate_dehydratase	45.4777	0.66205	0.274974	2.40768	0.0160542	0.105513	38	39	34	60	53	38	38	61	51
EA665_000505|RTG_family_carbenicillin-hydrolyzing_class_A_beta-lactamase_CARB-16	4113.31	-0.200084	0.0831218	-2.40711	0.0160792	0.105513	4709	4886	4832	3301	4077	3333	3843	4489	4087
EA665_011935|hypothetical_protein	20.768	1.02751	0.427115	2.4057	0.0161417	0.105755	9	11	15	22	28	12	32	27	34
CP039343_1414844_1415130	126.422	0.4315	0.179426	2.40488	0.0161777	0.105822	110	115	113	123	132	132	149	141	123
CP039341_2436311_2436546	48.2841	0.744013	0.309557	2.40348	0.0162398	0.105969	48	32	18	42	56	43	72	73	53
CP039343_2180106_2180218	15.8351	1.14863	0.477954	2.40322	0.0162515	0.105969	6	15	7	16	21	16	17	22	23
EA665_015005|hypothetical_protein	124.887	-0.428838	0.178785	-2.39862	0.016457	0.107061	162	174	151	85	142	85	109	121	119
CP039343_2061207_2061323	136.434	-1.14655	0.478128	-2.398	0.0164846	0.107061	199	162	242	59	116	62	55	185	197
CP039343_434409_434483	507.734	-0.256963	0.107169	-2.39773	0.016497	0.107061	638	610	637	512	462	377	465	471	461
EA665_003365|DUF454_domain-containing_protein	108.628	-0.432054	0.180908	-2.38825	0.0169287	0.10969	142	154	128	101	92	76	94	98	110
EA665_017185|hypothetical_protein	56.6174	0.58372	0.244704	2.38542	0.0170598	0.110367	48	58	44	62	71	59	46	69	53
EA665_008215|N-acetyltransferase	134.067	-0.396975	0.166575	-2.38316	0.0171648	0.110872	165	158	162	111	130	77	134	143	155
EA665_011860|hypothetical_protein	7.01751	2.1032	0.883495	2.38054	0.0172871	NA	1	6	0	12	4	9	12	15	3
EA665_015450|outer_membrane_lipoprotein_LolB	100.798	-0.46973	0.197785	-2.37495	0.0175511	0.11319	119	151	117	65	99	75	86	102	112
EA665_001095|DUF485_domain-containing_protein	625.758	-0.305217	0.128639	-2.37267	0.0176603	0.113716	852	683	778	647	544	419	498	655	654
EA665_015290|elongation_factor_Tu	61777.3	0.191395	0.080704	2.37157	0.0177127	0.113875	58716	59690	61223	62688	63088	49813	73070	67171	65902
EA665_003275|folate-binding_protein_YgfZ	151.981	0.391801	0.165256	2.37087	0.0177461	0.113912	137	133	149	194	163	116	160	161	166
EA665_017200|tRNA_pseudouridine(38-40)_synthase_TruA	199.546	-0.358473	0.151248	-2.37011	0.0177829	0.113971	219	285	249	154	196	152	154	213	208
EA665_009030|peptidylprolyl_isomerase	1040.12	-0.222319	0.0938615	-2.36859	0.0178561	0.114262	1174	1258	1217	1029	997	670	1031	1078	1080
EA665_004550|RNA_polymerase_sigma_factor	1170.92	-0.205975	0.0870127	-2.36719	0.0179239	0.11439	1299	1404	1470	1098	1121	878	1001	1220	1214
EA665_015370|BCCT_family_carnitine_transporter	49.6459	0.662027	0.279704	2.36689	0.0179385	0.11439	34	41	40	52	60	44	78	54	45
EA665_018465|DNA_polymerase_IV	58.679	0.576641	0.243673	2.36645	0.0179594	0.11439	54	44	62	69	73	62	60	58	44
EA665_000770|type_VI_secretion_system_tip_protein_VgrG	31.0428	-0.771753	0.326489	-2.3638	0.0180888	0.115037	48	48	41	28	24	17	27	20	33
EA665_001860|antibiotic_biosynthesis_monooxygenase	77.6105	-0.486182	0.206141	-2.35849	0.0183495	0.116515	95	106	108	61	80	49	70	71	74
EA665_011745|IS5_family_transposase	28.5391	0.813506	0.345179	2.35676	0.018435	0.116878	17	24	23	42	28	26	30	34	33
CP039343_2457695_2457768	4.10891	2.79298	1.18739	2.3522	0.018663	NA	2	1	0	9	0	8	5	5	5
EA665_015015|DUF3800_domain-containing_protein	149.707	-0.389691	0.165733	-2.35132	0.0187069	0.118419	165	203	169	127	145	82	149	185	157
EA665_010290|SDR_family_NAD(P)-dependent_oxidoreductase	17.1585	1.0543	0.448817	2.34907	0.0188204	0.118955	11	10	11	20	21	16	16	21	29
EA665_010580|MFS_transporter	12.1061	1.35182	0.57551	2.34891	0.0188283	NA	6	2	10	12	13	14	21	16	14
CP039343_2348709_2349061	105.659	0.490793	0.209406	2.34374	0.0190913	0.120483	96	76	87	133	124	60	123	133	134
EA665_012725|hypothetical_protein	109.633	-0.438309	0.187067	-2.34306	0.0191264	0.120519	126	148	134	74	113	72	97	117	129
EA665_010095|pyrroloquinoline-quinone_synthase_PqqC	172.796	-0.35521	0.151876	-2.33882	0.019345	0.121711	210	240	196	157	151	124	165	185	154
EA665_005230|hypothetical_protein	332.435	-0.324155	0.138712	-2.3369	0.0194443	0.122149	357	442	450	322	314	221	258	304	383
EA665_017870|OmpW_family_protein	15850.4	-0.195965	0.0839698	-2.33376	0.0196085	0.122994	17762	19840	18912	14568	15602	12055	12692	16466	17037
EA665_005175|phosphate_ABC_transporter_permease_PstA	120.711	0.41359	0.17733	2.33231	0.0196842	0.12315	92	108	104	125	126	96	159	153	134
EA665_007045|four-helix_bundle_copper-binding_protein	109.018	-0.45711	0.196004	-2.33214	0.0196933	0.12315	115	179	155	91	98	89	70	100	101
CP039343_485997_486588	100.166	0.466139	0.200039	2.33024	0.0197934	0.123589	84	83	91	120	112	75	98	106	142
CP039343_3768270_3768747	282.893	0.301737	0.129556	2.32901	0.0198584	0.123807	262	296	250	325	294	234	269	311	327
EA665_007650|hypothetical_protein	7.38311	1.60048	0.687396	2.32832	0.019895	NA	6	2	4	12	9	10	6	10	6
EA665_008820|type_1_fimbrial_protein	19.1351	-0.956804	0.411013	-2.32792	0.0199164	0.123981	26	28	29	15	15	7	20	19	19
EA665_001380|hypothetical_protein	68.7098	-0.552768	0.237724	-2.32525	0.0200588	0.124679	88	93	97	69	68	28	61	61	71
EA665_016625|hypothetical_protein	462.027	-0.244781	0.105333	-2.32388	0.020132	0.124946	573	558	564	459	449	322	407	450	444
EA665_011890|hypothetical_protein	23.6127	0.889645	0.382999	2.32284	0.0201877	0.125103	15	19	16	22	31	26	27	21	35
EA665_011725|hypothetical_protein	22.1746	1.07972	0.465385	2.32007	0.0203372	0.12584	19	8	18	21	26	33	11	42	19
CP039343_1900492_1900657	12.6531	-1.36351	0.587928	-2.31918	0.0203852	NA	16	25	26	4	9	9	1	18	10
EA665_015845|NADH-quinone_oxidoreductase_subunit_J	1523.42	0.206665	0.0891813	2.31735	0.0204844	0.126561	1404	1504	1498	1421	1591	1325	1756	1745	1585
EA665_018180|LPS_export_ABC_transporter_permease_LptF	632.155	-0.213187	0.0921252	-2.3141	0.0206624	0.12739	702	741	742	572	599	446	639	687	659
EA665_019555|hypothetical_protein	74.4647	0.506887	0.219074	2.31377	0.0206804	0.12739	61	73	58	93	80	61	74	81	94
EA665_010180|DUF4882_domain-containing_protein	21.9616	-0.899014	0.388947	-2.3114	0.0208105	0.127982	35	39	24	13	18	14	15	22	23
EA665_008475|taurine_dioxygenase	32.0046	0.762931	0.330224	2.31034	0.0208692	0.127982	27	22	20	29	38	33	31	46	43
EA665_011505|PAS_domain-containing_protein	310.403	0.311611	0.134877	2.31033	0.0208696	0.127982	286	305	293	281	348	305	271	385	337
EA665_015690|hypothetical_protein	445.951	-0.261055	0.113033	-2.30954	0.0209136	0.128056	515	497	549	372	430	316	389	518	504
EA665_016590|NAD(P)(+)_transhydrogenase_(Re/Si-specific)_subunit_beta	159.694	-0.360483	0.156121	-2.309	0.0209439	0.128056	201	217	217	166	163	98	121	146	137
EA665_015195|acetylglutamate_kinase	427.384	-0.27364	0.118576	-2.30771	0.0210154	0.128303	457	549	556	414	372	317	397	393	451
EA665_010835|oxidoreductase	14.8515	1.19991	0.520584	2.30493	0.0211707	0.12906	7	5	13	11	15	22	15	21	23
EA665_013825|methylenetetrahydrofolate_reductase_[NAD(P)H]	888.002	-0.213473	0.0928278	-2.29967	0.0214669	0.130672	1035	1107	946	742	901	644	901	936	915
EA665_013840|NADP-dependent_malic_enzyme	2887.24	0.217346	0.094694	2.29524	0.0217192	0.132013	2725	2766	2739	2984	3095	2160	3594	3170	3044
EA665_015830|NADH-quinone_oxidoreductase_subunit_M	4024.52	0.218186	0.0952264	2.29123	0.0219499	0.133219	3785	3940	3973	3494	4325	3748	4491	4571	4147
EA665_014555|carbonic_anhydrase	176.356	0.400112	0.174789	2.28912	0.0220724	0.133765	156	158	142	173	206	139	260	182	184
CP039343_2244724_2244838	85.9615	0.473328	0.206922	2.28747	0.0221685	0.133996	70	83	71	94	89	82	92	84	111
EA665_000685|SCP-2_sterol_transfer_family_protein	1032.03	-0.216219	0.0945283	-2.28735	0.0221754	0.133996	1117	1296	1225	856	1023	798	893	1105	1129
EA665_001505|TolC_family_protein	36.3773	-0.686819	0.300438	-2.28606	0.0222507	0.134254	59	50	47	22	34	27	27	32	36
EA665_011405|hypothetical_protein	15.6351	1.11175	0.486572	2.28485	0.0223214	0.134483	6	12	12	25	20	11	12	18	26
EA665_012795|AarF/ABC1/UbiB_kinase_family_protein	620.126	-0.214542	0.0939268	-2.28415	0.0223629	0.134537	684	739	740	538	633	432	598	676	643
CP039343_2619381_2619481	182.754	-0.359557	0.157485	-2.28311	0.0224238	0.13467	243	204	220	152	195	104	171	192	202
EA665_007800|DUF4011_domain-containing_protein	608.263	0.226315	0.0991452	2.28266	0.0224505	0.13467	569	572	591	547	672	516	651	746	668
CP039343_2303399_2303634	5.39595	2.58932	1.13471	2.28192	0.0224941	NA	0	0	3	1	12	3	8	9	14
EA665_007400|5-oxoprolinase/urea_amidolyase_family_protein	51.0857	0.607622	0.266455	2.28039	0.0225844	0.135277	45	37	46	71	57	40	43	59	65
EA665_003060|acetyl-CoA_carboxylase_carboxyltransferase_subunit_beta	1420.57	0.251779	0.110466	2.27924	0.022653	0.13549	1210	1387	1348	1413	1485	1126	1906	1572	1462
CP039343_2702396_2702752	2.23004	3.53915	1.55332	2.27844	0.0227005	NA	1	0	0	6	4	1	3	4	1
EA665_008645|hypothetical_protein	125.171	-0.400819	0.175927	-2.27833	0.022707	0.135617	179	148	150	109	119	83	98	132	131
EA665_019045|2-methylcitrate_synthase	883.44	-0.237517	0.104378	-2.27555	0.0228727	0.136409	1011	952	1079	700	780	714	856	1037	941
CP039343_2489539_2489611	1.69698	3.88257	1.70723	2.27419	0.0229546	NA	0	0	0	2	3	2	3	0	5
EA665_016360|DUF2339_domain-containing_protein	127.023	-0.416815	0.183602	-2.27022	0.0231944	0.138127	131	182	172	108	134	72	104	146	124
CP039343_2598263_2598457	69.0198	0.559983	0.246944	2.26765	0.0233505	0.138856	67	51	48	67	98	48	66	104	82
CP039343_2039663_2039758	6.89633	-1.69843	0.750132	-2.26418	0.0235632	NA	6	23	9	2	5	3	4	6	7
EA665_001100|cation_acetate_symporter	1367.76	-0.203782	0.090165	-2.26011	0.0238147	0.141412	1575	1484	1723	1279	1345	949	1244	1516	1411
EA665_010955|type_I_3-dehydroquinate_dehydratase	40.8599	0.689689	0.305481	2.25772	0.0239633	0.14209	32	32	32	35	70	30	40	46	56
EA665_012085|XRE_family_transcriptional_regulator	27.5461	0.756724	0.335468	2.25573	0.0240878	0.142623	19	24	24	31	38	28	25	31	28
CP039343_2402458_2402579	43.1923	0.68846	0.305515	2.25344	0.0242313	0.143267	45	29	26	54	44	40	44	41	66
EA665_011785|hypothetical_protein	8.35256	1.70862	0.758254	2.25336	0.0242362	NA	7	1	2	13	7	8	19	5	12
EA665_004185|glycerophosphodiester_phosphodiesterase	5.54587	-1.98137	0.879812	-2.25204	0.0243196	NA	6	13	8	2	4	0	4	6	10
EA665_019140|glycosyltransferase	400.68	0.277942	0.123525	2.25009	0.0244435	0.144315	404	358	347	439	421	298	436	437	507
EA665_015840|NADH-quinone_oxidoreductase_subunit_NuoK	1122.12	0.229882	0.102233	2.24862	0.0245367	0.144658	1026	1103	1082	1047	1142	1014	1315	1325	1118
CP039343_2437615_2437858	16.7399	1.03939	0.462586	2.24691	0.0246459	0.145094	15	8	10	17	28	14	13	24	23
EA665_019440|5-(carboxyamino)imidazole_ribonucleotide_synthase	910.464	0.203306	0.090566	2.24484	0.0247786	0.145667	835	950	892	955	984	708	985	962	1014
EA665_018835|porin	16.6363	1.06522	0.474906	2.24302	0.0248953	0.146145	9	13	9	27	12	16	23	23	17
CP039343_2789090_2789175	426.415	-0.300816	0.134319	-2.23956	0.0251197	0.147113	485	564	503	285	418	367	419	428	423
EA665_009405|acyl-CoA_dehydrogenase	23.2457	-0.87478	0.390636	-2.23937	0.0251316	0.147113	26	37	28	13	13	16	21	35	26
EA665_017580|polyphosphate--AMP_phosphotransferase	131.14	-0.378216	0.168974	-2.23831	0.0252007	0.147308	153	188	154	119	122	86	117	122	143
CP039343_975764_976058	389.528	-0.259225	0.115897	-2.23668	0.0253073	0.147721	444	518	463	335	354	324	360	396	358
EA665_018550|DUF2236_domain-containing_protein	80.2267	0.477522	0.213785	2.23366	0.0255057	0.148669	72	81	61	92	96	68	66	92	100
EA665_008920|hypothetical_protein	294.785	-0.281194	0.12607	-2.23046	0.0257171	0.149689	369	348	350	272	299	187	301	294	283
CP039343_2792495_2792631	5.29618	1.84945	0.830198	2.22772	0.0258989	NA	2	2	4	4	14	7	5	3	6
EA665_015090|EmrA/EmrK_family_multidrug_efflux_transporter_periplasmic_adaptor_subunit	196.811	0.319424	0.143457	2.22662	0.0259724	0.150963	197	178	180	225	212	158	196	228	213
EA665_009025|fructose-bisphosphate_aldolase_class_II	1886.31	0.189137	0.0850196	2.22463	0.026106	0.151525	1787	1907	1805	1868	1973	1528	2206	2014	2057
EA665_007195|KpsF/GutQ_family_sugar-phosphate_isomerase	757.56	-0.206659	0.0929673	-2.22292	0.0262214	0.151981	792	929	924	669	747	549	701	802	824
EA665_007275|peptidase_M15	408.591	-0.246754	0.111045	-2.2221	0.0262765	0.152087	447	549	513	361	421	308	349	422	368
EA665_009710|VWA_domain-containing_protein	310.104	-0.271443	0.122271	-2.22001	0.0264181	0.152525	351	343	389	264	268	234	297	347	344
CP039343_1118221_1118460	36.9795	-0.70312	0.316799	-2.21946	0.0264558	0.152525	39	57	54	28	30	21	22	46	46
EA665_019495|guanine_deaminase	173.673	-0.335605	0.151218	-2.21934	0.0264634	0.152525	210	198	212	164	154	105	181	185	186
EA665_003090|preprotein_translocase_subunit_SecA	2189.73	-0.172522	0.0777568	-2.21874	0.0265043	0.152548	2383	2826	2696	2055	2346	1627	1875	2146	2063
EA665_007310|lauroyl_acyltransferase	202.074	-0.428583	0.193227	-2.21803	0.026553	0.152615	249	292	236	104	218	170	170	234	179
EA665_001855|hypothetical_protein	71.3007	-0.492621	0.222371	-2.21531	0.0267387	0.153468	81	95	116	65	72	42	64	59	62
EA665_000640|phosphatidylglycerophosphatase_A	373.019	-0.251313	0.113862	-2.20718	0.0273015	0.156481	412	450	439	288	369	279	384	415	379
EA665_001470|sulfate_permease	18.387	0.996384	0.45184	2.20517	0.027442	0.156958	12	15	12	26	19	21	30	12	16
EA665_006730|hypothetical_protein	40.991	0.676145	0.306655	2.2049	0.0274609	0.156958	27	36	38	35	65	39	29	48	55
EA665_001665|glutamate_synthase_large_subunit	4232.8	-0.189058	0.0857849	-2.20386	0.0275342	0.157158	4576	5340	5024	3440	4282	3451	3918	4539	4076
EA665_008695|SfnB_family_sulfur_acquisition_oxidoreductase	3.73939	2.57099	1.16702	2.20304	0.0275922	NA	2	1	0	5	4	6	1	9	5
EA665_010895|histidine_phosphatase_family_protein	83.6133	0.486051	0.221371	2.19564	0.0281175	0.160266	63	81	67	75	108	71	70	112	115
EA665_005130|DUF541_domain-containing_protein	95.9058	-0.432936	0.197283	-2.19449	0.0282001	0.160515	141	138	117	84	104	65	79	90	61
EA665_005880|hypothetical_protein	85.7237	-0.499942	0.228049	-2.19225	0.0283612	0.161209	108	115	117	80	82	46	52	83	109
EA665_015085|DHA2_family_efflux_MFS_transporter_permease_subunit	100.983	0.412032	0.188354	2.18754	0.0287029	0.162927	99	83	99	120	114	87	107	107	97
EA665_016895|phosphogluconate_dehydratase	1555.41	0.199967	0.0914778	2.18597	0.0288181	0.163355	1347	1583	1596	1531	1628	1285	1817	1707	1641
EA665_001135|NADPH:quinone_oxidoreductase	58.5075	-0.524904	0.240388	-2.18357	0.0289937	0.164125	69	100	71	49	55	39	49	57	49
CP039343_371197_371406	45.6947	-0.59678	0.273535	-2.18173	0.0291295	0.164667	79	62	56	36	44	32	30	34	46
EA665_013130|glycine_betaine/L-proline_transporter_ProP	58.3659	-0.528382	0.242349	-2.18025	0.0292386	0.165058	70	82	88	38	57	47	45	60	48
CP039343_465322_465429	5392.79	0.186356	0.08554	2.17858	0.029363	0.165533	4955	5014	5486	5357	5482	4230	6583	6085	5869
CP039343_1704488_1704972	1219.48	-0.558321	0.256378	-2.17773	0.0294265	0.165556	1573	1844	1659	726	1239	970	708	1264	1222
EA665_008060|indolepyruvate_ferredoxin_oxidoreductase_family_protein	2083.56	0.287086	0.131845	2.17745	0.0294473	0.165556	2066	1461	2288	2395	2186	1545	2205	2434	2374
EA665_015825|NADH-quinone_oxidoreductase_subunit_NuoN	3125.15	0.192047	0.0882337	2.17657	0.0295125	0.16565	2920	3079	3129	2714	3416	2765	3434	3655	3273
EA665_019820|hypothetical_protein	51.7165	0.613997	0.282149	2.17614	0.0295445	0.16565	29	53	43	46	65	52	59	45	75
EA665_017560|exodeoxyribonuclease_V_subunit_alpha	120.148	0.40076	0.184638	2.17052	0.0299674	0.167793	96	100	110	95	150	102	149	155	136
CP039343_164525_164714	607.434	0.230287	0.106222	2.16797	0.0301609	0.168647	569	628	622	673	703	463	558	612	702
CP039343_3173059_3173123	12.5	1.17948	0.544183	2.16743	0.0302018	NA	11	10	3	15	20	12	16	8	17
CP039343_3475349_3475666	52.0042	-0.543586	0.250945	-2.16615	0.0302995	0.169179	66	62	67	36	47	32	57	58	54
EA665_005870|hypothetical_protein	181.43	-0.319084	0.147339	-2.16565	0.030338	0.169179	203	210	242	151	164	134	180	203	174
EA665_009675|ribonuclease_D	216.068	-0.355669	0.164287	-2.16493	0.0303929	0.169256	258	277	253	128	240	161	203	251	213
CP039343_419262_419334	3.41365	-2.89143	1.33669	-2.16312	0.0305319	NA	6	1	11	0	0	2	2	6	4
EA665_018565|DUF2946_domain-containing_protein	346.776	0.323636	0.149938	2.15846	0.0308922	0.171725	319	330	327	319	405	320	436	398	283
EA665_006025|hypothetical_protein	1166.38	-0.188445	0.0873197	-2.1581	0.0309197	0.171725	1266	1393	1405	1073	1108	871	1023	1289	1241
EA665_010985|3-carboxy-cis,cis-muconate_cycloisomerase	43.3957	0.641378	0.297424	2.15644	0.0310491	0.172212	32	35	38	36	47	55	38	61	47
EA665_011985|TraR/DksA_family_transcriptional_regulator	1.79319	3.85519	1.78781	2.15638	0.0310542	NA	0	0	0	0	5	2	6	3	0
CP039343_779632_779729	410.774	-0.23298	0.108092	-2.15538	0.0311322	0.17224	468	531	498	404	402	288	363	400	405
EA665_011045|alpha/beta_hydrolase	81.0598	0.445626	0.206758	2.15531	0.0311377	0.17224	62	78	73	91	86	71	78	97	99
EA665_003315|hypothetical_protein	1.41551	3.975	1.84461	2.15493	0.0311674	NA	0	0	0	2	6	0	3	2	0
EA665_015490|aminoacyl-tRNA_hydrolase	1774.24	-0.179437	0.0832927	-2.15429	0.0312173	0.172449	2009	2048	2048	1503	1804	1319	1876	1893	1717
CP039343_2179413_2179467	31.7668	0.747634	0.347195	2.15335	0.0312909	0.172623	22	25	18	23	44	27	33	56	42
EA665_009520|3-deoxy-7-phosphoheptulonate_synthase	727.573	0.194829	0.0905062	2.15266	0.0313456	0.172694	691	714	691	715	799	550	804	835	833
EA665_005835|hypothetical_protein	6.1601	1.66369	0.773702	2.1503	0.0315312	NA	4	1	4	7	7	10	6	9	6
EA665_004380|glycosyltransferase_family_39_protein	5.99408	-1.76001	0.818659	-2.14986	0.0315659	NA	5	13	10	1	3	3	9	5	7
CP039343_2729398_2729980	1.64437	3.45011	1.60488	2.14977	0.0315734	NA	0	1	0	4	3	3	1	1	1
EA665_018920|amino_acid_permease	254.103	0.31209	0.145263	2.14845	0.031678	0.174239	216	254	252	249	324	200	281	312	225
EA665_017110|ATP-dependent_helicase	246.686	-0.282949	0.131788	-2.147	0.0317935	0.174239	288	331	282	212	226	194	213	266	243
CP039343_3217179_3217474	722.615	-0.237396	0.110572	-2.14697	0.0317956	0.174239	848	883	867	538	801	554	642	710	770
EA665_016385|acetyl-CoA_carboxylase_carboxyltransferase_subunit_alpha	1376.04	0.271405	0.126475	2.14592	0.0318793	0.174239	1130	1302	1329	1356	1432	1098	1978	1471	1398
EA665_010820|primary-amine_oxidase	12.5271	1.20753	0.562868	2.14532	0.0319274	NA	11	3	5	15	14	9	14	21	22
EA665_011655|molybdenum_cofactor_guanylyltransferase	21.3159	0.94085	0.438567	2.14528	0.0319303	0.174239	6	12	21	16	28	20	22	34	35
EA665_010470|ABC_transporter_ATP-binding_protein	23.3195	0.809827	0.377581	2.14478	0.0319707	0.174239	17	17	14	26	25	21	27	34	30
EA665_013215|BLUF_domain-containing_protein	20.0007	-0.914951	0.426597	-2.14477	0.0319713	0.174239	32	27	25	19	16	4	17	23	24
CP039343_3653674_3653763	575.183	0.231844	0.108118	2.14437	0.0320035	0.174239	508	563	575	495	640	515	641	655	630
EA665_017820|peptide_signal_protein	29.4657	-0.703048	0.327864	-2.14433	0.0320065	0.174239	35	46	50	23	27	19	28	22	21
EA665_002175|metal-dependent_hydrolase	54.717	-0.554769	0.258969	-2.14222	0.0321758	0.174929	60	90	60	47	40	35	61	52	58
CP039343_2547620_2547855	29.8137	-0.716915	0.334911	-2.14061	0.0323053	0.175402	39	41	43	27	27	11	26	29	34
EA665_010875|MarR_family_transcriptional_regulator	104.245	0.449278	0.210038	2.13903	0.0324334	0.175866	69	101	95	104	92	109	112	148	111
CP039343_3492928_3493120	64.547	-0.50922	0.238233	-2.13749	0.0325585	0.176312	74	81	72	43	63	32	76	89	68
EA665_002525|DUF2789_domain-containing_protein	209.847	-0.313943	0.14694	-2.13654	0.0326353	0.176496	253	285	252	193	213	141	151	228	211
CP039343_2149704_2150373	4.35928	1.87748	0.879218	2.1354	0.0327285	NA	2	2	3	9	7	6	4	4	1
CP039343_2907885_2907937	2.13485	3.10895	1.45597	2.13532	0.032735	NA	0	1	1	2	4	8	1	0	0
EA665_007070|exodeoxyribonuclease_VII	29.8818	-0.698409	0.327347	-2.13354	0.0328805	0.177589	45	42	50	25	24	23	14	29	22
EA665_006350|aspartate_aminotransferase_family_protein	46.3471	0.62884	0.295244	2.1299	0.0331801	0.178973	43	39	36	71	49	37	46	34	63
EA665_003055|tryptophan_synthase_subunit_alpha	2684.68	0.221346	0.104156	2.12513	0.0335754	0.180868	2466	2548	2630	2700	2806	2134	3491	2894	2719
CP039343_3245016_3245302	11.6309	-1.17947	0.555018	-2.1251	0.0335783	NA	23	11	16	8	6	5	10	13	16
CP039343_1980365_1980503	5.35257	-1.81453	0.853864	-2.12508	0.0335802	NA	7	10	8	1	2	3	6	8	5
EA665_018005|acyl-CoA_thioesterase	27.3315	0.774407	0.364513	2.1245	0.0336284	0.180917	15	24	22	42	30	18	36	32	29
EA665_000345|VOC_family_protein	30.1076	0.738366	0.34767	2.12376	0.0336905	0.180966	23	20	22	21	42	30	40	33	41
EA665_013585|NirD/YgiW/YdeI_family_stress_tolerance_protein	42.2049	0.651173	0.306726	2.12298	0.0337555	0.180966	36	30	40	33	71	40	45	54	33
EA665_012800|HesA/MoeB/ThiF_family_protein	153.521	-0.356172	0.167783	-2.12282	0.0337692	0.180966	162	210	202	151	125	107	127	176	148
EA665_016830|nucleoside-diphosphate_kinase	2417.26	0.165173	0.0778662	2.12124	0.0339013	0.181438	2224	2514	2336	2257	2618	1926	2756	2754	2627
CP039343_378255_378504	6.26617	1.70412	0.804458	2.11834	0.0341459	NA	7	2	0	11	6	8	8	7	6
EA665_003915|rhodanese-related_sulfurtransferase	1250.61	-0.181567	0.0858158	-2.11577	0.034364	0.183676	1417	1481	1410	1028	1320	917	1191	1328	1356
CP039343_294222_294525	4.09679	2.12734	1.00703	2.1125	0.0346437	NA	0	2	3	7	3	8	6	2	4
EA665_017865|DUF1311_domain-containing_protein	266.486	-0.322396	0.152704	-2.11125	0.034751	0.185504	350	366	297	189	270	231	200	284	246
EA665_018990|DUF3396_domain-containing_protein	768.999	-0.200215	0.0948913	-2.10994	0.0348637	0.185865	832	826	868	692	722	481	852	882	905
EA665_011995|hypothetical_protein	8.92616	1.54614	0.733656	2.10745	0.0350788	NA	1	5	3	8	12	3	13	17	21
EA665_015035|hypothetical_protein	12.0578	-1.16229	0.551607	-2.1071	0.0351087	NA	18	24	13	2	11	8	10	13	13
EA665_000070|tyrosine--tRNA_ligase	532.965	0.227953	0.108213	2.10651	0.0351597	0.1872	513	518	498	595	544	400	586	585	611
EA665_018245|ImmA/IrrE_family_metallo-endopeptidase	459.433	0.236923	0.112539	2.10524	0.0352703	0.187547	429	473	393	495	477	340	516	542	521
EA665_019050|methylisocitrate_lyase	445.145	-0.236373	0.112331	-2.10425	0.0353566	0.187763	520	504	550	381	390	366	428	471	449
CP039343_3076448_3076861	19.0133	-0.86955	0.413504	-2.10288	0.0354763	0.188157	36	20	33	15	16	11	14	13	17
CP039343_2173768_2173863	1.23176	3.83707	1.82498	2.10253	0.0355071	NA	0	0	0	2	4	1	1	0	3
EA665_019100|glucose-6-phosphate_isomerase	1478.02	-0.192336	0.0915037	-2.10195	0.0355575	0.188345	1597	1738	1684	1116	1490	1149	1493	1637	1615
CP039343_4036713_4036885	122.304	-0.358825	0.170778	-2.10112	0.0356302	0.18845	176	174	146	123	119	90	88	97	104
EA665_010540|TetR/AcrR_family_transcriptional_regulator	48.0186	0.565079	0.268997	2.10068	0.0356687	0.18845	44	36	37	60	52	37	59	51	59
EA665_008225|amino_acid_ABC_transporter_permease	7.83633	1.38548	0.660357	2.09807	0.0358986	NA	3	4	6	9	11	9	9	8	11
EA665_017890|DNA_transfer_protein_p32	50.6919	-0.522113	0.249262	-2.09464	0.0362034	0.19085	64	68	82	42	51	35	42	42	39
CP039343_402310_402903	106.423	-0.391204	0.186836	-2.09384	0.0362742	0.19085	143	136	121	91	86	83	91	120	102
CP039343_2970257_2970845	147.018	-0.338236	0.161565	-2.0935	0.0363042	0.19085	179	173	185	135	121	107	130	170	146
EA665_010105|pyrroloquinoline_quinone_biosynthesis_protein_PqqE	159.034	-0.356425	0.170286	-2.09309	0.0363409	0.19085	157	211	220	153	140	101	130	187	164
EA665_009760|lipoyl_synthase	194.931	-0.375182	0.179297	-2.09251	0.0363925	0.19085	210	236	239	115	163	168	179	268	207
EA665_010970|4-carboxymuconolactone_decarboxylase	47.6689	0.608905	0.291032	2.09223	0.036418	0.19085	44	25	37	39	46	52	61	67	58
EA665_012015|hypothetical_protein	18.7163	0.88838	0.424675	2.0919	0.0364472	0.19085	12	15	14	27	21	17	13	24	26
CP039343_2381564_2381880	64.2375	0.497941	0.238095	2.09136	0.0364959	0.190862	61	67	47	68	89	56	68	53	72
CP039343_1421667_1421730	954.886	-0.17767	0.0849882	-2.09053	0.0365706	0.191011	1087	1139	1145	828	995	733	904	935	955
EA665_011730|DUF159_family_protein	20.5796	0.82244	0.393631	2.08937	0.0366747	0.191312	13	16	17	27	26	17	24	23	23
CP039343_2877380_2877526	5.73349	-1.72231	0.827218	-2.08206	0.0373374	NA	5	11	15	1	4	3	2	9	4
EA665_003930|succinate_dehydrogenase,_cytochrome_b556_subunit	1442.83	-0.168945	0.0811726	-2.0813	0.0374064	0.194882	1576	1675	1686	1328	1420	1024	1517	1474	1495
EA665_011565|hypothetical_protein	1.96199	3.5826	1.72211	2.08035	0.0374934	NA	0	0	1	8	1	2	0	0	5
CP039343_3571603_3571931	581.759	0.215069	0.103525	2.07745	0.0377598	0.196357	554	622	546	561	620	524	627	624	595
EA665_000950|M23_family_metallopeptidase	1203.42	0.173334	0.0834465	2.07718	0.0377847	0.196357	1155	1182	1183	1237	1275	902	1324	1355	1353
EA665_001955|N-succinylarginine_dihydrolase	548.077	0.248004	0.119477	2.07574	0.037918	0.196801	501	538	445	509	577	426	742	647	603
EA665_016675|TetR/AcrR_family_transcriptional_regulator	9.15687	-1.21754	0.58879	-2.06787	0.0386524	NA	14	23	12	7	6	5	5	8	5
EA665_010585|SMP-30/gluconolactonase/LRE_family_protein	18.3485	0.940532	0.455259	2.06593	0.0388352	0.201308	6	15	16	16	28	17	14	29	26
CP039343_568497_569031	79.3031	-0.451353	0.218632	-2.06444	0.0389758	0.201783	98	95	107	68	80	42	77	99	66
EA665_007420|filamentous_hemagglutinin_N-terminal_domain-containing_protein	273.583	0.269649	0.130916	2.05971	0.0394259	0.203857	273	263	229	282	271	235	308	313	307
EA665_011555|hypothetical_protein	28.9706	0.743558	0.361224	2.05844	0.0395481	0.204233	10	25	24	29	29	26	35	39	46
CP039343_1931404_1931483	55.1591	-0.648876	0.315363	-2.05755	0.0396329	0.204415	59	72	101	28	71	30	28	61	63
EA665_003420|TIGR01666_family_membrane_protein	406.341	-0.234936	0.114297	-2.05549	0.0398322	0.205137	436	513	470	324	397	310	412	464	392
CP039343_4014041_4014214	23.7621	-0.869901	0.423296	-2.05507	0.0398724	0.205137	15	31	44	12	17	13	29	39	21
EA665_015900|HAMP_domain-containing_protein	896.975	-0.195916	0.0957118	-2.04694	0.0406644	0.20895	931	1140	1089	753	895	708	802	953	928
CP039343_2065359_2065561	7.78766	-1.47282	0.719808	-2.04613	0.0407434	NA	13	7	13	3	2	5	8	6	15
CP039343_3422555_3422890	322.344	-0.252926	0.123671	-2.04515	0.0408399	0.209591	399	373	379	319	282	227	322	318	327
CP039344_24639_24957	39.8226	0.591931	0.289777	2.04271	0.0410811	0.210566	26	36	44	48	58	32	39	38	40
EA665_002715|YfiR_family_protein	90.8734	-0.408588	0.200275	-2.04014	0.0413367	0.211613	112	102	114	64	92	57	97	91	107
EA665_008665|ABC_transporter_permease	3.36544	2.20584	1.08144	2.03972	0.0413778	NA	0	2	2	3	9	4	4	3	3
CP039343_2317015_2317197	14.1921	0.973869	0.477899	2.03782	0.0415684	0.212535	14	12	6	19	20	15	11	13	17
EA665_000185|molecular_chaperone_DnaJ	793.312	-0.187787	0.0922522	-2.03558	0.0417926	0.213417	881	1028	987	712	835	630	642	769	759
CP039343_3565549_3566283	37.9959	-0.625069	0.307828	-2.03058	0.0422981	0.215731	42	48	60	33	33	18	37	51	30
EA665_018135|homoserine_dehydrogenase	1034.11	0.18099	0.0891554	2.03005	0.0423516	0.215737	931	1004	1056	1036	1094	783	1192	1154	1172
CP039343_2541564_2541737	38.9732	-0.737085	0.363245	-2.02917	0.0424414	0.215751	49	43	63	20	54	9	44	44	39
EA665_013380|hypothetical_protein	124.886	-0.352495	0.173729	-2.02899	0.0424592	0.215751	164	155	144	122	105	84	127	124	118
CP039343_3358548_3359266	5719.41	0.158572	0.0782076	2.02758	0.0426034	0.216217	5294	5747	5427	4912	6302	4553	6616	6663	6618
EA665_011855|hypothetical_protein	15.0095	0.963505	0.475386	2.02678	0.0426844	0.216362	6	10	16	18	24	12	17	17	16
CP039343_882700_882780	5.88206	1.55711	0.768766	2.02546	0.0428201	NA	4	3	2	8	10	5	6	7	8
CP039343_2887330_2887817	3.86831	2.11236	1.04321	2.02487	0.0428812	NA	0	3	2	2	13	4	2	3	6
CP039343_2952693_2952748	1.40286	3.80655	1.87991	2.02486	0.0428815	NA	0	0	0	0	6	1	0	3	3
EA665_011885|hypothetical_protein	15.9253	0.997257	0.493201	2.02201	0.0431753	0.218582	9	10	14	9	20	26	13	19	21
EA665_014385|urease_accessory_protein	39.5241	0.61078	0.30225	2.02078	0.0433028	0.218958	45	34	26	51	56	32	29	49	36
EA665_010910|LysR_family_transcriptional_regulator	35.3114	0.619834	0.307088	2.01842	0.0435472	0.219924	22	34	28	36	46	29	40	47	39
EA665_010125|uracil-DNA_glycosylase_family_protein	59.9607	-0.551117	0.273118	-2.01787	0.0436048	0.219945	64	80	85	58	49	28	49	51	91
CP039343_2119032_2120339	2.17307	3.24701	1.61037	2.01631	0.0437673	NA	0	0	1	4	4	1	0	5	5
EA665_003000|acyl-CoA_desaturase	5092.46	-0.167724	0.0832	-2.01592	0.0438085	0.220703	5742	6132	5808	4194	5286	3995	5047	5560	4745
EA665_013310|hypothetical_protein	326.011	-0.237523	0.1179	-2.01462	0.0439446	0.221118	364	350	401	281	301	229	325	362	374
EA665_010335|SDR_family_oxidoreductase	9.26881	1.21073	0.601746	2.01203	0.0442171	NA	9	6	3	13	14	9	10	12	7
EA665_006860|cAMP-activated_global_transcriptional_regulator_CRP	694.888	0.202955	0.100878	2.01187	0.0442332	0.222299	630	676	700	749	726	511	697	810	839
EA665_010400|acid_phosphatase	9.2418	1.22794	0.610475	2.01144	0.0442788	NA	7	4	6	11	12	11	13	6	12
EA665_005150|Lrp/AsnC_family_transcriptional_regulator	44.7668	0.57753	0.287225	2.01072	0.0443545	0.222438	34	43	40	67	42	40	37	58	43
EA665_015425|23S_rRNA_pseudouridine(1911/1915/1917)_synthase_RluD	528.766	-0.201822	0.100379	-2.01059	0.0443688	0.222438	573	586	636	431	520	387	540	591	577
CP039343_2441173_2441224	9.76914	1.3139	0.655296	2.00505	0.044958	NA	0	5	10	11	13	8	10	18	14
EA665_007540|type_VI_secretion_system_tube_protein_Hcp	13314.8	-0.145605	0.0726247	-2.00489	0.0449743	0.225199	15159	14861	14825	12457	13009	9398	14086	13802	14131
CP039343_1563309_1563388	206.298	-0.295344	0.147419	-2.00343	0.0451307	0.225482	235	237	286	184	182	161	211	185	201
EA665_007215|LPS_export_ABC_transporter_ATP-binding_protein	187.646	-0.293008	0.14626	-2.00335	0.0451402	0.225482	188	238	239	157	177	131	189	193	209
CP039343_2966412_2966513	6.09575	1.60613	0.802574	2.00122	0.0453684	NA	2	5	1	7	9	5	11	7	8
EA665_007405|ATP-grasp_domain-containing_protein	81.6988	0.408519	0.204274	1.99986	0.0455156	0.227082	76	79	72	86	90	81	82	95	76
CP039343_1835816_1835879	1.26521	-3.63365	1.81903	-1.99757	0.0457632	NA	3	0	5	0	0	0	2	1	1
EA665_016780|protein-export_chaperone_SecB	1846.59	-0.154818	0.0775065	-1.99749	0.045772	0.227948	2168	2352	2109	1678	1989	1443	1570	1803	1742
EA665_006590|hypothetical_protein	200.992	-0.302503	0.151461	-1.99723	0.0457998	0.227948	268	222	232	172	190	141	225	205	183
EA665_003975|ADP-forming_succinate--CoA_ligase_subunit_beta	5448.56	-0.144687	0.0724644	-1.99666	0.0458619	0.227982	5897	6124	5998	4774	5171	4011	6089	5924	5807
EA665_014860|homocysteine_S-methyltransferase_family_protein	22.6624	0.838693	0.420355	1.9952	0.0460208	0.228496	17	14	14	33	25	12	41	27	23
CP039343_3103425_3103767	1518.06	-0.183888	0.0922201	-1.99401	0.0461506	0.228737	1886	1804	1771	1349	1429	1310	1347	1506	1408
CP039343_1759341_1759782	2.78487	2.67211	1.3404	1.99353	0.0462038	NA	1	1	0	3	5	3	3	5	4
EA665_008615|[protein-PII]_uridylyltransferase	545.258	-0.202971	0.101847	-1.9929	0.0462725	0.228737	579	681	638	461	537	413	494	599	588
EA665_014445|citrate_transporter	1007.38	0.198849	0.0997833	1.99281	0.0462821	0.228737	1002	1019	918	1008	1022	852	1180	1114	1026
CP039343_1476844_1477362	746.867	0.263002	0.131981	1.99273	0.0462913	0.228737	874	692	733	708	894	753	697	597	783
EA665_003160|nitrite/sulfite_reductase	804.053	0.229492	0.115274	1.99083	0.0464995	0.22949	738	758	787	927	843	543	951	888	897
EA665_019185|polysaccharide_biosynthesis_tyrosine_autokinase	2147	-0.14491	0.0728259	-1.98981	0.0466121	0.229771	2266	2577	2480	1906	2179	1595	2075	2308	2248
CP039343_357074_357243	3.66163	2.15359	1.0825	1.98946	0.0466506	NA	4	0	1	8	10	2	0	3	5
EA665_012810|AMP-binding_protein	505.559	-0.30509	0.153447	-1.98825	0.0467845	0.230345	676	453	712	496	485	310	424	575	510
CP039343_244878_244942	5.04573	1.82973	0.920868	1.98696	0.0469265	NA	0	1	5	4	7	7	5	7	9
EA665_016900|acetate_kinase	662.545	-0.273157	0.137687	-1.9839	0.0472669	0.232442	795	708	894	739	582	393	590	728	650
EA665_006220|NADH:flavin_oxidoreductase/NADH_oxidase_family_protein	131.981	0.384783	0.194051	1.98289	0.0473796	0.232719	119	110	134	187	127	94	128	149	151
EA665_002090|DEAD/DEAH_box_helicase	15584.2	-0.21924	0.110619	-1.98193	0.0474872	0.23297	18951	19360	17949	11665	16076	13388	15771	15561	13225
EA665_010495|cupin_domain-containing_protein	35.6535	0.646889	0.326881	1.97897	0.0478189	0.234318	22	32	24	47	28	29	44	42	55
CP039343_160290_160342	12.8371	-1.20269	0.608884	-1.97524	0.0482405	NA	30	7	19	14	3	4	12	19	11
EA665_004475|phosphoribosylformylglycinamidine_cyclo-ligase	1700.34	0.164258	0.0831619	1.97516	0.0482503	0.236152	1554	1773	1691	1694	1742	1374	1927	1846	1863
CP039343_2041800_2042041	3.56288	2.23844	1.13407	1.97382	0.0484026	NA	1	0	3	7	4	5	4	0	7
CP039343_3185029_3185100	234.868	-0.264557	0.13422	-1.97107	0.0487158	0.238147	268	256	301	188	224	176	225	266	246
EA665_008520|metalloregulator_ArsR/SmtB_family_transcription_factor	5.83939	1.54525	0.78444	1.96988	0.0488526	NA	2	3	4	10	10	3	8	6	7
CP039343_3763493_3763650	5.13367	-1.73658	0.882242	-1.96837	0.0490258	NA	9	6	8	2	3	1	10	5	4
CP039343_3619970_3620686	10615.1	-0.16329	0.0829849	-1.96771	0.0491013	0.239747	13329	12183	12695	10595	10183	8407	8624	10352	10362
EA665_011040|metal-dependent_hydrolase	16.5143	0.974721	0.495721	1.96627	0.0492673	0.240064	4	16	11	10	25	17	17	24	26
CP039343_3201755_3201839	1660.1	0.197553	0.100495	1.96581	0.0493211	0.240064	1662	1607	1481	1657	1688	1323	2076	1789	1801
EA665_016645|aconitate_hydratase_AcnA	1566.15	-0.234636	0.119369	-1.96563	0.049341	0.240064	1673	2055	1994	1235	1661	1259	1132	1729	1596
EA665_006075|hypothetical_protein	10.9255	1.04481	0.531843	1.9645	0.0494719	NA	7	7	13	17	19	12	10	5	7
EA665_004920|hypothetical_protein	176.176	-0.294582	0.150034	-1.96344	0.0495956	0.241018	220	206	211	174	161	112	162	191	179
CP039343_2216620_2216772	1.37576	3.488	1.77753	1.96227	0.0497308	NA	1	0	0	1	4	5	0	0	0
EA665_008175|stress-induced_protein	3425.67	-0.492611	0.251214	-1.96092	0.0498886	0.242007	4203	5301	4739	2006	3350	3162	2216	3470	2860
EA665_018720|glutathione_S-transferase	166.05	-0.34195	0.174404	-1.96068	0.0499165	0.242007	205	190	209	156	143	110	119	213	181
EA665_006740|GDSL_family_lipase	24.6793	0.776348	0.396271	1.95913	0.0500972	0.242597	15	21	18	25	30	24	14	36	41
EA665_018945|winged_helix-turn-helix_transcriptional_regulator	6.44274	1.49891	0.765582	1.95787	0.0502458	NA	6	2	3	11	10	6	12	3	4
CP039343_1697275_1697361	28.0376	-0.81326	0.415667	-1.95652	0.0504042	0.243532	37	59	28	11	39	12	18	22	36
EA665_009370|hypothetical_protein	67.3628	-0.45329	0.231793	-1.95558	0.0505148	0.243532	83	80	89	53	54	50	75	55	77
CP039343_1559467_1560069	172.093	-0.329805	0.16869	-1.95509	0.0505722	0.243532	240	189	175	120	164	128	183	179	197
CP039343_1268515_1268608	48.8382	0.503263	0.257423	1.95501	0.0505824	0.243532	43	44	42	59	50	47	51	53	51
EA665_000760|glutamate--cysteine_ligase	240.157	-0.254916	0.130393	-1.95498	0.0505856	0.243532	270	285	280	191	229	179	225	279	262
EA665_000940|UDP-3-O-acyl-N-acetylglucosamine_deacetylase	310.29	-0.252576	0.129492	-1.95052	0.0511142	0.24579	330	398	367	252	322	216	347	319	292
CP039343_3930293_3930553	1.49613	-3.24781	1.6651	-1.95052	0.0511144	NA	4	5	3	0	0	1	0	0	1
CP039343_2004953_2005218	561.625	-0.734907	0.377207	-1.94828	0.0513809	0.246502	758	741	697	318	659	201	392	715	770
EA665_013400|amidophosphoribosyltransferase	1369.92	-0.155779	0.0799574	-1.94828	0.051382	0.246502	1450	1663	1632	1290	1373	993	1287	1456	1386
CP039343_3941439_3941505	252.255	-0.249626	0.128245	-1.94648	0.0515972	0.246745	297	300	293	209	230	200	244	278	253
EA665_014955|DUF2939_domain-containing_protein	110.324	-0.362422	0.186194	-1.94647	0.0515978	0.246745	116	125	143	89	95	72	103	125	147
EA665_003450|patatin-like_phospholipase_family_protein	79.4744	-0.415168	0.213342	-1.94602	0.0516525	0.246745	89	98	115	80	63	51	75	74	84
CP039343_3727320_3727428	14.3454	-0.953856	0.490199	-1.94585	0.0516722	0.246745	28	18	17	9	11	8	19	12	10
CP039343_1531405_1531707	36.8874	-0.57812	0.297634	-1.94238	0.0520907	0.248127	45	54	42	23	34	24	37	39	42
EA665_001825|hemerythrin_domain-containing_protein	317.886	-0.248603	0.127998	-1.94224	0.0521078	0.248127	375	398	370	295	296	233	246	359	339
EA665_012710|hypothetical_protein	2.78877	2.79281	1.43798	1.94217	0.0521165	NA	0	0	2	0	8	4	3	6	2
EA665_012945|50S_ribosomal_protein_L9	6827.45	0.151712	0.0781304	1.94178	0.0521632	0.248127	6675	6678	6687	6549	6995	5510	8041	7564	7392
EA665_015780|hypothetical_protein	69.421	-0.437655	0.225462	-1.94115	0.0522399	0.248127	83	90	95	54	69	47	49	83	69
EA665_013065|sorbosone_dehydrogenase_family_protein	189.944	-0.31135	0.16041	-1.94096	0.0522626	0.248127	211	242	245	199	152	130	153	219	190
EA665_018740|PadR_family_transcriptional_regulator	37.301	0.581078	0.299606	1.93947	0.0524438	0.248701	28	31	38	52	38	34	39	42	34
EA665_013090|MCE_family_protein	150.262	-0.310985	0.161047	-1.93102	0.0534802	0.253136	184	160	185	137	123	105	148	166	168
CP039343_3741_3793	800.5	-0.197842	0.102489	-1.93037	0.053561	0.253136	907	928	885	768	681	578	762	866	947
EA665_007450|glutathione-dependent_formaldehyde_dehydrogenase	39.2217	-0.605924	0.313893	-1.93035	0.0535634	0.253136	47	77	44	35	31	28	20	43	36
CP039343_3129055_3129255	93.0949	-0.398995	0.206859	-1.92883	0.0537523	0.253372	142	107	130	86	92	69	57	72	96
EA665_006290|hypothetical_protein	139.101	-0.312158	0.161861	-1.92855	0.0537863	0.253372	165	169	177	136	129	89	127	138	146
EA665_015495|aspartate_1-decarboxylase	886.887	-0.194799	0.101024	-1.92824	0.0538251	0.253372	934	1065	1035	791	828	649	1010	952	842
EA665_009265|ABC_transporter_ATP-binding_protein	110.875	0.363421	0.188536	1.92759	0.0539063	0.253372	87	102	95	110	115	88	142	115	154
EA665_004820|GFA_family_protein	20.3719	-0.77662	0.402921	-1.92747	0.0539208	0.253372	27	38	24	19	18	8	19	16	20
EA665_002480|DUF3108_domain-containing_protein	344.885	-0.238427	0.123737	-1.92688	0.0539949	0.253432	411	443	425	335	319	272	256	327	360
EA665_017850|hypothetical_protein	149.1	0.354635	0.184272	1.92452	0.0542893	0.254523	138	152	150	194	201	95	116	149	166
CP039343_2404762_2404907	9.48502	1.34734	0.700258	1.92406	0.0543475	NA	6	7	4	18	15	5	7	2	22
CP039343_2067190_2067957	11.4542	-1.01065	0.52613	-1.92091	0.054743	NA	17	17	20	9	8	6	8	7	14
EA665_014315|23S_rRNA_(pseudouridine(1915)-N(3))-methyltransferase_RlmH	104.079	-0.400905	0.208727	-1.92072	0.0547675	0.256474	145	134	108	82	117	56	116	113	88
CP039343_1868175_1868598	5.89809	1.52211	0.792604	1.9204	0.054808	NA	5	3	1	6	8	8	10	6	5
CP039343_225895_226060	59.6641	-0.467623	0.243573	-1.91985	0.0548769	0.256694	57	86	82	53	54	33	56	69	61
EA665_003485|Asp-tRNA(Asn)/Glu-tRNA(Gln)_amidotransferase_subunit_GatB	1505.96	0.170389	0.0888064	1.91865	0.0550281	0.25711	1391	1504	1524	1488	1587	1189	1761	1728	1532
CP039343_799658_800071	57.558	-0.478211	0.249699	-1.91515	0.0554738	0.258898	85	73	84	46	65	39	30	50	57
EA665_019385|alpha/beta_hydrolase	116.789	-0.370749	0.193812	-1.91294	0.0557563	0.259923	124	147	160	118	102	67	91	126	141
EA665_010100|pyrroloquinoline_quinone_biosynthesis_peptide_chaperone_PqqD	83.2067	-0.388697	0.203295	-1.91198	0.0558781	0.260196	100	109	106	63	74	68	69	92	80
CP039343_3632918_3633066	178.399	-0.282441	0.147852	-1.9103	0.056095	0.260727	188	229	215	149	181	117	188	191	180
CP039343_211734_212028	43.1574	-0.57006	0.298443	-1.91011	0.0561187	0.260727	67	40	74	44	35	26	32	34	44
EA665_006580|adenosine_deaminase	354.294	-0.209705	0.109823	-1.90948	0.0562002	0.260812	403	431	406	312	345	262	344	369	368
CP039343_2377983_2378080	6.99423	1.54647	0.809985	1.90925	0.0562294	NA	3	2	3	10	5	5	4	15	17
EA665_017910|50S_ribosomal_protein_L7/L12	8827.97	0.16077	0.0843911	1.90506	0.0567729	0.263173	8835	8445	8343	8800	9057	6748	10669	9789	9669
EA743_02110|DEAD/DEAH_box_helicase	21077.4	-0.210747	0.110692	-1.90391	0.0569225	0.263263	25499	25928	24205	15573	21981	18089	21347	21144	18241
CP039343_1111214_1111287	556.358	0.210392	0.110555	1.90305	0.0570341	0.263263	527	530	542	581	571	435	619	561	694
EA665_007055|hypothetical_protein	22.3708	-0.699299	0.367535	-1.90267	0.0570833	0.263263	37	35	36	15	24	18	10	18	12
EA665_002620|enoyl-CoA_hydratase/isomerase_family_protein	16.6828	-0.939345	0.493756	-1.90245	0.0571126	0.263263	23	29	22	4	17	12	7	25	16
EA665_011400|hypothetical_protein	61.4772	0.485769	0.255389	1.90207	0.0571619	0.263263	48	50	43	47	69	53	59	93	99
CP039343_1586946_1587263	18.4875	0.856853	0.450509	1.90197	0.0571756	0.263263	6	20	14	20	31	12	21	20	25
CP039343_2937296_2937368	18.2098	-0.854332	0.449419	-1.90097	0.0573059	0.263569	24	24	33	14	18	7	7	19	24
CP039343_3986085_3986163	6.82371	-1.54998	0.816332	-1.89871	0.0576024	NA	7	9	8	6	0	1	12	11	10
EA665_000195|4-hydroxy-tetrahydrodipicolinate_reductase	520.819	0.189101	0.0995961	1.89868	0.0576071	0.264659	536	506	528	533	573	430	499	559	569
EA665_003475|hypothetical_protein	87.4682	-0.397544	0.209464	-1.89791	0.0577077	0.264826	111	107	110	96	67	51	82	88	91
CP039343_1318749_1318814	44.9702	0.575518	0.303447	1.8966	0.0578806	0.265146	36	41	45	71	42	42	54	44	28
EA665_015570|SMC-Scp_complex_subunit_ScpB	663.074	-0.179498	0.0946749	-1.89594	0.0579675	0.265146	754	772	807	562	680	522	625	693	639
CP039343_2358716_2359382	25.4298	0.764506	0.403237	1.89592	0.0579704	0.265146	11	18	26	35	31	15	24	47	26
EA665_004685|CysB_family_HTH-type_transcriptional_regulator	134.023	0.320995	0.169391	1.89499	0.0580935	0.265414	132	115	138	141	145	125	123	135	158
EA665_016940|TonB-dependent_siderophore_receptor	1024.69	0.502799	0.265594	1.89311	0.0583433	0.26626	812	854	825	1110	1131	797	1755	1025	964
EA665_003570|undecaprenyl-diphosphate_phosphatase	310.848	-0.233011	0.123153	-1.89204	0.0584853	0.266613	341	392	382	304	299	212	271	307	340
EA665_008775|cytosine_permease	58.994	0.473515	0.250416	1.89091	0.0586359	0.267004	50	53	49	49	77	55	50	82	71
EA665_018625|F0F1_ATP_synthase_subunit_epsilon	3860.89	0.182063	0.0964709	1.88723	0.059129	0.268952	3617	3811	3797	3563	4048	3264	4795	4295	3870
EA665_003340|response_regulator	38.0256	0.579775	0.307297	1.88669	0.0592018	0.268986	30	29	34	40	44	35	44	58	30
CP039343_2297424_2298051	46.6711	0.533218	0.282945	1.88453	0.0594935	0.270014	28	46	37	38	55	44	47	59	70
EA665_012925|cytochrome_o_ubiquinol_oxidase_subunit_IV	756.121	0.215138	0.11428	1.88255	0.0597618	0.270934	714	827	711	710	813	702	781	913	682
CP039343_3084261_3084616	2.31341	2.8124	1.4957	1.88033	0.0600634	NA	1	0	1	10	0	2	2	1	3
EA665_005840|HNH_endonuclease	9.5078	1.14679	0.610999	1.87692	0.0605296	NA	8	3	7	9	13	12	6	12	15
EA665_005185|protease_SohB	370.297	-0.237025	0.12632	-1.87639	0.0606016	0.274322	404	486	485	382	387	238	289	358	368
EA665_006270|DUF898_domain-containing_protein	37.6278	-0.542557	0.289195	-1.87609	0.0606425	0.274322	43	57	53	28	36	26	33	39	31
CP039343_3709916_3710078	4257.32	0.14512	0.0774476	1.87378	0.0609602	0.275259	4126	4328	4099	4270	4462	3202	4884	4639	4780
EA665_003965|2-oxoglutarate_dehydrogenase_complex_dihydrolipoyllysine-residue_succinyltransferase	4971.35	-0.144709	0.0772352	-1.87362	0.0609832	0.275259	5343	5763	5551	4286	4794	3799	5479	5325	5054
CP039343_428611_428733	154.447	0.298189	0.159315	1.87169	0.0612491	0.276147	120	163	151	155	173	129	168	186	159
EA665_000310|4-hydroxy-tetrahydrodipicolinate_synthase	3283.95	0.131643	0.0703511	1.87122	0.0613139	0.276147	3182	3356	3452	3133	3487	2741	3410	3639	3463
EA665_000835|allantoinase_PuuE	6.73205	1.4353	0.767783	1.86941	0.0615665	NA	2	2	6	6	9	8	13	10	4
EA665_002935|aspartate--tRNA_ligase	3253.98	0.165628	0.0886491	1.86836	0.0617125	0.277551	3038	3140	3301	3313	3342	2474	3945	3579	3489
EA665_000945|DUF721_domain-containing_protein	793.22	0.176763	0.0946262	1.86801	0.0617603	0.277551	788	779	736	792	794	642	906	882	892
CP039343_2738415_2738578	1.80424	-3.14071	1.6816	-1.8677	0.0618043	NA	8	3	0	1	0	0	1	1	3
EA665_015835|NADH-quinone_oxidoreductase_subunit_L	4179.68	0.173172	0.0927546	1.86699	0.0619029	0.277889	3901	4147	4208	3598	4412	3748	4788	4764	4372
EA665_015235|septum_site-determining_protein_MinD	3644.93	-0.124673	0.0668043	-1.86624	0.0620074	0.278055	3900	4275	4127	3230	3684	2756	3565	3908	3863
EA665_004485|DnaA_regulatory_inactivator_Hda	181.313	-0.274818	0.147341	-1.86519	0.0621553	0.278415	199	227	209	145	176	129	162	209	208
EA665_009680|hypothetical_protein	75.0567	-0.403101	0.216278	-1.86381	0.062349	0.27898	114	100	92	68	83	49	56	54	72
EA665_002060|hypothetical_protein	241.28	-0.244433	0.131196	-1.86312	0.0624456	0.279109	277	284	280	202	234	173	214	281	267
EA665_002875|bifunctional_[glutamate--ammonia_ligase]-adenylyl-L-tyrosine_phosphorylase/[glutamate--ammonia-ligase]_adenylyltransferase	1133.9	0.160685	0.0863723	1.86037	0.0628326	0.280408	1079	1140	1156	1014	1250	964	1150	1320	1243
EA665_008100|AMP-binding_protein	820.924	-0.267152	0.143623	-1.86009	0.0628723	0.280408	1030	776	1090	825	704	541	651	960	951
EA665_009380|HU_family_DNA-binding_protein	2943.19	0.148734	0.0800513	1.85798	0.063172	0.281358	2961	2916	2861	3099	2936	2274	3103	3265	3378
EA665_015350|oxidoreductase	34.8121	0.591798	0.318577	1.85763	0.0632219	0.281358	31	29	21	42	43	21	42	46	43
CP039343_2191756_2191922	1.4833	3.20147	1.724	1.85701	0.0633099	NA	1	0	0	1	2	5	2	1	0
CP039343_3839948_3840070	176.803	0.272743	0.146944	1.8561	0.0634388	0.282019	162	187	166	182	211	142	181	204	173
EA665_001915|class_I_SAM-dependent_methyltransferase	86.7599	-0.386127	0.208127	-1.85525	0.0635605	0.28211	102	119	94	74	78	55	69	101	107
EA665_009340|Fe-S_protein_assembly_chaperone_HscA	1185.66	-0.168115	0.090628	-1.855	0.0635962	0.28211	1347	1458	1290	1028	1250	857	1238	1178	1196
EA665_002145|ATP-dependent_DNA_helicase_RecG	208.375	-0.2625	0.141659	-1.85305	0.0638758	0.283045	237	280	246	176	188	177	181	210	205
EA665_017325|Rne/Rng_family_ribonuclease	2457.3	0.16492	0.0890538	1.85192	0.0640375	0.28316	2335	2548	2508	2318	2705	2069	2664	2876	2314
EA665_000010|DNA_polymerase_III_subunit_beta	764.013	0.187834	0.101453	1.85144	0.064106	0.28316	717	854	735	767	874	615	810	861	717
EA665_017915|50S_ribosomal_protein_L10	21586	0.153583	0.0829538	1.85143	0.0641077	0.28316	21079	21340	21541	21980	21792	17156	25400	23023	22921
EA665_005980|hypothetical_protein	9.9862	1.06288	0.574348	1.85058	0.0642298	NA	10	5	6	14	15	9	6	13	12
CP039343_2613243_2613325	191.088	0.32133	0.17366	1.85034	0.064264	0.28332	169	193	171	201	242	134	205	269	161
CP039343_3201328_3201518	508.869	0.195332	0.105572	1.85022	0.0642815	0.28332	480	543	506	516	519	457	472	560	563
EA665_003615|hypothetical_protein	1.9941	2.92125	1.57944	1.84955	0.0643787	NA	1	0	0	2	3	2	2	4	4
EA665_008120|LysR_family_transcriptional_regulator	22.6217	-0.683859	0.37016	-1.84747	0.0646789	0.284535	38	27	38	16	22	17	18	17	14
EA665_006275|NLPA_lipoprotein	186.519	0.268269	0.145218	1.84736	0.0646953	0.284535	170	171	184	199	193	150	182	230	218
EA665_008735|YebC/PmpR_family_DNA-binding_transcriptional_regulator	683.835	0.201263	0.108987	1.84667	0.0647955	0.284672	650	643	665	759	709	474	793	768	775
EA665_013190|sodium/glutamate_symporter	275.472	0.261596	0.141752	1.84545	0.0649717	0.285142	261	277	253	336	270	208	310	280	307
EA665_000995|phosphoglucosamine_mutase	1163.84	-0.155651	0.0843897	-1.84443	0.0651203	0.28549	1229	1386	1374	1077	1112	875	1094	1312	1180
EA665_017900|DNA-directed_RNA_polymerase_subunit_beta'	28678.1	0.137943	0.0748432	1.84309	0.0653161	0.286044	28299	27064	28923	26858	28929	23477	32934	32401	31949
CP039343_2371429_2372657	26.2618	0.818851	0.444756	1.84112	0.0656035	0.286916	13	8	27	21	43	11	45	30	44
EA665_016775|glutaredoxin_3	1199.07	-0.158707	0.0862388	-1.84032	0.0657219	0.286916	1350	1551	1449	1065	1290	980	1032	1070	1143
EA665_014475|capsule_assembly_Wzi_family_protein	938.033	-0.181022	0.0983974	-1.8397	0.0658122	0.286916	1025	1205	1079	959	892	655	850	923	993
EA665_000720|phosphate_regulon_transcriptional_regulatory_protein_PhoB	258.409	0.234594	0.127541	1.83936	0.0658617	0.286916	253	244	249	267	265	219	281	298	269
EA665_009070|biopolymer_transporter_ExbD	114.26	-0.341303	0.185556	-1.83935	0.0658633	0.286916	124	146	136	83	94	95	127	113	125
EA665_002000|hypothetical_protein	2.81061	2.20547	1.19939	1.83883	0.0659403	NA	1	1	1	3	6	3	5	2	3
EA665_016160|S-formylglutathione_hydrolase	292.494	-0.22728	0.12375	-1.8366	0.0662695	0.288071	328	344	327	247	255	226	278	344	326
EA665_001580|16S_rRNA_(cytosine(1402)-N(4))-methyltransferase_RsmH	592.088	-0.187326	0.102014	-1.83627	0.0663176	0.288071	647	735	673	543	624	390	567	607	644
EA665_001550|amino_acid_permease	264.199	0.310667	0.169196	1.83613	0.0663382	0.288071	287	219	237	287	324	189	346	280	232
EA665_018730|pirin_family_protein	410.098	-0.198356	0.108099	-1.83496	0.0665123	0.288523	479	459	503	357	405	314	374	424	432
CP039343_2562544_2562833	19.7166	-0.798327	0.435287	-1.83402	0.0666506	0.288723	27	24	28	12	23	5	15	29	22
EA665_004335|amino_acid_permease	383.6	0.202563	0.110477	1.83353	0.0667238	0.288723	365	363	373	363	416	308	386	477	444
EA665_000735|MATE_family_efflux_transporter	66.0829	-0.421995	0.230192	-1.83323	0.0667684	0.288723	73	90	103	54	73	44	46	68	57
EA665_011650|molybdopterin_oxidoreductase_family_protein	28.7135	0.654615	0.357338	1.83192	0.0669632	0.28907	18	22	27	35	29	26	23	32	48
EA665_010800|3-oxoadipate_enol-lactonase	19.2636	0.769298	0.419984	1.83173	0.0669916	0.28907	19	8	18	21	26	19	23	20	19
EA665_013430|NAD(P)H-dependent_glycerol-3-phosphate_dehydrogenase	460.572	-0.19598	0.107018	-1.83128	0.0670591	0.28907	494	544	557	389	454	349	415	529	484
CP039343_2278809_2278897	4.39201	1.99675	1.09207	1.8284	0.0674889	NA	0	0	4	2	9	3	11	6	5
EA665_014655|galactose_mutarotase	187.762	-0.276654	0.151344	-1.82798	0.0675519	0.29089	214	279	223	177	198	133	135	184	178
EA665_014375|urease_accessory_protein	71.1435	0.4188	0.22928	1.82659	0.067762	0.29149	61	56	82	84	69	73	68	78	69
EA665_005260|MFS_transporter	501.932	-0.18074	0.0990265	-1.82517	0.0679753	0.292102	567	603	571	448	491	377	482	551	498
EA665_008135|hypothetical_protein	43.1826	-0.545548	0.299269	-1.82293	0.0683138	0.293195	52	75	55	26	49	32	23	49	37
EA665_019135|glycosyltransferase_family_1_protein	535.071	0.204121	0.112023	1.82214	0.0684344	0.293195	533	501	503	577	529	413	598	564	648
EA665_010110|peptidase	83.5599	-0.437688	0.240213	-1.82208	0.0684429	0.293195	99	131	89	55	70	74	56	107	84
CP039343_2103079_2103511	190.062	-0.267021	0.146601	-1.82141	0.0685446	0.293237	201	234	239	183	180	119	175	206	209
CP039343_2436331_2436478	8.39898	1.32354	0.726666	1.82139	0.0685478	NA	1	9	2	6	8	11	16	14	8
EA665_012975|circularly_permuted_type_2_ATP-grasp_protein	113.021	-0.334827	0.183862	-1.82108	0.0685952	0.293237	129	140	156	119	102	69	95	121	107
EA665_008405|DUF2474_domain-containing_protein	31.8156	-0.663081	0.364431	-1.8195	0.0688358	0.293961	33	51	36	12	39	15	28	43	40
EA665_006535|SDR_family_NAD(P)-dependent_oxidoreductase	11.5376	1.1662	0.64201	1.81649	0.0692951	NA	10	3	2	5	14	10	19	15	27
EA665_004545|hypothetical_protein	417.042	-0.19472	0.107208	-1.81628	0.0693267	0.295511	444	534	489	390	402	306	394	433	422
EA665_003935|succinate_dehydrogenase,_hydrophobic_membrane_anchor_protein	1820.04	-0.146321	0.0805801	-1.81584	0.0693949	0.295511	1961	2120	2137	1681	1729	1393	1901	1877	1810
CP039343_2767935_2768000	71.4769	0.409274	0.225407	1.81572	0.069414	0.295511	66	76	56	73	91	62	86	73	64
CP039343_2795961_2796054	6.82981	-1.23323	0.679215	-1.81568	0.0694202	NA	12	11	12	4	7	2	4	7	5
EA665_017025|thymidylate_synthase	550.483	-0.210656	0.116137	-1.81386	0.0696995	0.296421	589	694	632	447	531	434	602	607	491
EA665_015320|protoporphyrinogen_oxidase_HemJ	353.157	0.298714	0.164972	1.8107	0.0701877	0.298189	297	284	379	371	365	277	522	368	340
EA665_004690|sulfate_ABC_transporter_ATP-binding_protein	64.6133	0.409545	0.226463	1.80844	0.0705384	0.299321	51	60	68	74	69	60	63	70	69
EA665_017380|AarF/ABC1/UbiB_kinase_family_protein	165.377	-0.310799	0.171898	-1.80805	0.0705994	0.299321	186	197	227	177	155	93	131	183	173
CP039343_1872459_1872597	3.90827	-1.84848	1.02256	-1.8077	0.0706529	NA	1	7	13	2	2	1	3	5	3
EA665_000840|HPF/RaiA_family_ribosome-associated_protein	3259.44	0.178975	0.0990162	1.80753	0.070679	0.29935	3272	3318	3209	3722	3316	2494	2937	3506	3898
EA665_015995|LysR_family_transcriptional_regulator	2.63005	2.23773	1.23802	1.80751	0.0706829	NA	1	2	0	4	4	4	2	1	5
CP039343_1714927_1715070	56.0186	-0.439151	0.243177	-1.80589	0.0709356	0.300129	70	85	61	49	53	35	52	53	57
EA665_001705|O-antigen_ligase_family_protein	130.695	0.320843	0.177762	1.8049	0.0710898	0.300473	101	127	132	111	164	111	141	139	163
EA665_000745|DUF445_domain-containing_protein	182.89	-0.289794	0.16064	-1.804	0.0712319	0.300765	214	233	211	142	210	114	164	223	173
EA665_007330|DUF2147_domain-containing_protein	13.0965	-0.866805	0.480565	-1.80372	0.071275	NA	24	20	23	12	7	12	7	7	7
CP039343_2619700_2619953	5.28616	-1.56754	0.87053	-1.80068	0.0717541	NA	13	6	5	2	3	2	8	2	8
CP039343_3578664_3578776	2.08852	2.61987	1.45578	1.79963	0.0719191	NA	0	0	2	3	7	1	2	2	2
CP039343_2380917_2380970	40.0756	0.553359	0.308085	1.79612	0.0724749	0.3057	30	39	29	51	45	28	34	66	44
EA665_018895|acyl-CoA_dehydrogenase	282.395	0.229249	0.127772	1.79421	0.0727798	0.306672	238	254	262	281	294	187	321	380	369
EA665_011585|SDR_family_NAD(P)-dependent_oxidoreductase	792.556	0.194253	0.108315	1.79341	0.0729077	0.306897	753	760	860	833	890	614	683	978	854
EA665_015165|RnfH_family_protein	300.973	-0.210444	0.117432	-1.79205	0.0731242	0.307495	333	348	355	267	299	204	301	331	321
EA665_000790|esterase	116.947	0.315631	0.176177	1.79155	0.073205	0.307521	113	119	98	128	138	88	115	137	129
CP039343_1798242_1798344	11.2311	-0.983196	0.548876	-1.79129	0.0732468	NA	13	19	20	4	7	11	7	12	10
CP039343_12041_12383	15.3496	0.847951	0.473743	1.7899	0.0734703	0.308321	12	11	10	15	21	15	10	20	25
EA665_000355|fumarylacetoacetase	73.8419	0.398689	0.222949	1.78825	0.0737363	0.309014	55	63	77	65	82	72	74	97	84
EA665_015455|4-(cytidine_5'-diphospho)-2-C-methyl-D-erythritol_kinase	3307.53	0.165478	0.0925525	1.78794	0.0737855	0.309014	3188	3141	3197	3327	3263	2564	4142	3750	3517
CP039343_3809818_3809971	51.1654	-0.478813	0.26793	-1.78708	0.0739244	0.309282	51	73	67	41	55	23	46	62	57
EA665_001035|3-deoxy-D-manno-octulosonic_acid_transferase	134.204	-0.296696	0.16612	-1.78604	0.0740933	0.309674	152	177	176	134	115	102	121	119	129
EA665_008480|aspartate/glutamate_racemase_family_protein	7.63254	1.22202	0.684293	1.78581	0.0741298	NA	5	7	3	5	15	10	8	4	11
EA665_014285|hypothetical_protein	13.81	-0.894913	0.501375	-1.78492	0.0742748	0.310118	20	22	19	12	8	8	6	21	12
EA665_017070|coniferyl_aldehyde_dehydrogenase	955.755	0.195681	0.109729	1.78331	0.0745352	0.31089	907	904	1086	1128	1014	715	890	1063	993
CP039343_1947848_1948037	1.64402	3.0694	1.72136	1.78312	0.0745662	NA	0	1	0	6	2	0	1	4	1
CP039343_3053592_3053853	6.19215	-1.29153	0.724676	-1.78222	0.074713	NA	8	16	11	4	3	5	4	5	1
EA665_015990|DUF1852_domain-containing_protein	2201.4	-0.168317	0.0944957	-1.78121	0.0748777	0.311873	2709	2755	2433	1835	2339	1834	2081	2126	1940
EA665_001865|flavodoxin_family_protein	81.1793	-0.366496	0.20581	-1.78075	0.0749538	0.311873	93	106	122	64	84	65	68	77	63
CP039343_987415_987630	4.23468	-1.67996	0.943407	-1.78073	0.0749561	NA	7	9	6	4	2	0	3	2	7
CP039343_3522191_3522358	4268.91	0.140773	0.0790648	1.78048	0.0749977	0.311873	4243	4452	4311	4208	4454	3593	4706	4494	4304
CP039343_3547297_3547355	1.24103	3.19003	1.79216	1.77999	0.075077	NA	0	1	0	3	1	4	0	1	0
CP039343_2600613_2600756	488.147	0.218619	0.122874	1.77922	0.0752038	0.312414	428	469	468	402	607	363	500	601	627
CP039343_482330_482576	63.1541	0.45546	0.256102	1.77843	0.0753334	0.312637	44	61	73	89	78	44	71	52	61
EA665_017000|PhoX_family_phosphatase	7.98911	1.23921	0.696933	1.77808	0.0753899	NA	3	3	10	10	11	11	2	7	14
EA665_015430|outer_membrane_protein_assembly_factor_BamD	1284.6	-0.143333	0.0807449	-1.77513	0.0758759	0.314548	1399	1552	1459	1117	1284	1013	1240	1370	1293
EA665_012685|LysR_family_transcriptional_regulator	285.444	-0.288126	0.162352	-1.77471	0.0759464	0.314548	344	365	366	174	324	253	243	292	244
CP039343_3700576_3700662	1684.92	0.135868	0.0766414	1.77278	0.0762651	0.315551	1622	1613	1640	1613	1718	1268	1941	1985	1966
EA665_011380|kynureninase	11.7874	1.00309	0.566111	1.7719	0.0764106	NA	4	6	11	7	17	12	13	18	19
EA665_003875|iron-containing_alcohol_dehydrogenase	933.527	0.225386	0.127456	1.76835	0.0770026	0.318282	943	885	1020	1211	966	693	775	964	1031
EA665_004220|SCP-2_sterol_transfer_family_protein	805.438	-0.172838	0.0978541	-1.76628	0.0773485	0.318822	896	1012	924	829	749	576	733	817	826
EA665_001585|cell_division_protein_FtsL	225.931	-0.23787	0.134676	-1.76624	0.0773556	0.318822	243	290	295	197	223	180	187	224	225
CP039343_3029368_3029544	1.43131	3.34607	1.89447	1.76623	0.077358	NA	0	0	0	0	4	1	4	0	4
CP039343_436459_436616	116.634	0.314695	0.17827	1.76527	0.0775191	0.318822	106	109	99	113	121	100	117	138	157
CP039343_1644926_1645017	3.46713	2.05948	1.16669	1.76523	0.0775252	NA	1	1	1	5	5	1	5	7	6
EA665_007325|MFS_transporter	6.07196	-1.3061	0.740144	-1.76466	0.077621	NA	12	9	8	2	4	4	7	5	5
EA665_006175|alpha/beta_hydrolase	238.045	-0.241151	0.136666	-1.76453	0.0776435	0.318822	257	277	308	185	248	178	212	263	253
EA665_014270|hypothetical_protein	7.06102	1.20471	0.682739	1.76452	0.0776443	NA	7	3	5	14	10	6	7	8	3
EA665_017065|TetR/AcrR_family_transcriptional_regulator	133.966	0.301079	0.170654	1.76426	0.0776883	0.318822	118	118	139	151	149	98	140	142	165
EA665_010975|MFS_transporter	34.1759	0.640252	0.362926	1.76414	0.0777088	0.318822	29	26	25	20	35	49	46	44	30
CP039343_1664599_1664660	1.3644	3.24768	1.84101	1.76408	0.0777192	NA	1	0	0	8	1	0	0	1	1
EA665_005775|hypothetical_protein	221.349	-0.248795	0.141045	-1.76394	0.0777422	0.318822	274	240	259	195	222	144	197	246	255
EA665_001220|FAD-binding_protein	479.004	0.280681	0.159127	1.76388	0.0777521	0.318822	452	459	427	496	523	378	709	467	431
CP039343_769613_769740	3.2597	1.82502	1.0347	1.76382	0.0777621	NA	2	1	3	7	5	6	0	4	0
EA665_014850|malate_dehydrogenase_(quinone)	1619.1	0.167711	0.0951143	1.76326	0.0778573	0.318936	1612	1605	1512	1639	1686	1239	1946	1854	1643
CP039343_1330544_1330669	1.89991	2.59087	1.46989	1.76262	0.0779642	NA	1	1	0	5	1	4	1	2	1
EA665_008880|hypothetical_protein	201.954	-0.255161	0.144825	-1.76186	0.0780934	0.319549	234	223	242	169	200	135	177	236	239
EA665_012045|HicB_family_protein	26.5045	0.711319	0.403827	1.76144	0.0781634	0.319549	16	25	18	18	40	25	16	47	37
EA665_014485|esterase	97.7065	-0.370363	0.210315	-1.76099	0.0782395	0.319549	100	101	150	87	84	62	83	111	121
EA665_019345|NADPH-dependent_oxidoreductase	220.652	-0.258176	0.146733	-1.75949	0.0784938	0.320148	273	301	246	191	212	182	162	212	235
EA665_015365|alpha/beta_hydrolase	27.5692	0.636473	0.36187	1.75884	0.0786044	0.320148	23	20	18	22	32	27	41	40	26
CP039343_3153007_3153126	15.1439	-0.847168	0.481767	-1.75846	0.0786696	0.320148	16	23	18	5	12	10	21	19	16
EA665_000965|hypothetical_protein	32.9955	-0.558258	0.317552	-1.75801	0.0787466	0.320148	38	40	43	24	23	23	36	32	44
EA665_018125|site-specific_tyrosine_recombinase_XerD	21.895	-0.664226	0.377865	-1.75784	0.0787745	0.320148	30	31	29	19	19	11	24	19	20
EA665_001410|DUF805_domain-containing_protein	41.0906	-0.499168	0.284097	-1.75703	0.0789125	0.320392	49	54	58	38	29	30	38	34	46
CP039343_3765048_3765105	531.571	0.235561	0.134265	1.75446	0.0793525	0.321862	573	502	515	656	496	448	507	500	615
EA665_005875|hypothetical_protein	6.28305	1.21579	0.693045	1.75427	0.0793837	NA	3	7	4	9	12	7	5	5	4
EA665_003175|VOC_family_protein	97.7896	-0.344068	0.196241	-1.75329	0.0795523	0.322355	129	124	121	89	107	59	70	109	92
EA665_003790|multidrug_efflux_RND_transporter_outer_membrane_channel_subunit_AdeK	6155.98	0.133787	0.0763752	1.75171	0.079824	0.323138	6155	5920	6124	5878	6130	5052	6998	6939	6780
EA665_014595|hypothetical_protein	94.7224	-0.337926	0.193025	-1.75069	0.08	0.323533	134	116	127	84	111	63	73	74	86
EA665_011395|hypothetical_protein	47.082	0.482866	0.276042	1.74925	0.080248	0.323988	42	37	47	52	50	48	33	61	55
CP039343_1169128_1169715	6.62293	-1.41221	0.80734	-1.74922	0.0802532	NA	8	6	10	2	6	0	7	9	15
EA665_001455|HAMP_domain-containing_protein	452.726	-0.192201	0.109884	-1.74912	0.0802699	0.323988	449	554	550	416	419	328	471	493	462
EA665_009205|GNAT_family_acetyltransferase	7.70646	-1.17803	0.67375	-1.74847	0.0803823	NA	12	10	12	4	6	3	5	6	14
EA665_015615|MFS_transporter	2194.27	-0.161604	0.0925421	-1.74628	0.0807627	0.325659	2530	2639	2491	1716	2317	1817	2030	2275	2204
EA665_009535|PepSY_domain-containing_protein	31.0428	0.564765	0.324176	1.74216	0.0814812	0.327785	28	23	26	33	32	32	37	32	36
EA665_015435|DNA_primase	293.976	-0.216204	0.124134	-1.7417	0.0815611	0.327785	342	340	369	242	325	212	281	299	281
CP039343_3516101_3516201	203.186	0.29336	0.168449	1.74153	0.08159	0.327785	237	190	167	217	245	166	205	251	166
EA665_005330|IS4_family_transposase_ISAba1	485.369	0.195943	0.112539	1.74111	0.0816637	0.327785	459	457	432	430	526	371	516	572	668
EA665_010350|PAAR_domain-containing_protein	269.441	-0.23873	0.137124	-1.74098	0.0816877	0.327785	289	353	297	268	239	176	242	318	291
EA665_016245|aminodeoxychorismate_synthase_component_I	30.6163	0.555502	0.319279	1.73986	0.0818834	0.328217	22	28	30	34	40	27	33	33	30
EA665_004555|RNA_methyltransferase	310.323	-0.227826	0.130976	-1.73946	0.0819546	0.328217	333	417	339	243	306	245	327	302	323
EA665_011370|alpha/beta_hydrolase	24.9621	0.658346	0.378664	1.7386	0.0821049	0.328499	17	23	18	34	22	22	20	32	38
EA665_008300|glutathione_transferase	121.824	-0.311734	0.179505	-1.73663	0.0824528	0.329281	140	160	150	93	109	106	96	130	128
CP039343_3378962_3379283	2539.77	-0.16726	0.0963151	-1.73659	0.0824602	0.329281	2759	3119	2852	1911	2754	1995	2438	2708	2688
CP039344_7903_7965	159.965	0.263906	0.152113	1.73494	0.0827521	0.330127	140	162	145	166	173	122	179	187	183
EA665_011665|nitrite_reductase_small_subunit_NirD	13.1539	0.907777	0.523307	1.73469	0.0827949	NA	4	9	13	18	15	9	13	20	19
EA665_010230|multidrug_efflux_RND_transporter_permease_subunit_AdeB	32.7042	-0.551527	0.318228	-1.73312	0.0830744	0.331092	39	42	36	22	31	16	38	42	37
CP039343_1305816_1305875	11.7423	-0.973973	0.562137	-1.73263	0.0831619	NA	11	20	20	3	10	9	6	16	14
EA665_004170|chaperonin_GroEL	2384.79	0.151632	0.0875369	1.7322	0.0832373	0.331421	2189	2782	2303	2469	2603	1864	2284	2631	2604
EA665_008970|ABC_transporter_ATP-binding_protein	396.595	-0.199472	0.115234	-1.73102	0.0834474	0.331937	476	441	424	339	410	259	408	431	450
EA665_005440|hypothetical_protein	3.00658	2.07329	1.19929	1.72877	0.0838512	NA	2	2	0	5	3	6	0	7	1
EA665_004325|Tim44_domain-containing_protein	1453.05	-0.145308	0.0840658	-1.72851	0.0838971	0.33318	1588	1777	1732	1242	1522	1177	1281	1481	1460
EA665_001090|response_regulator	240.755	-0.234126	0.13546	-1.72837	0.0839216	0.33318	243	274	321	201	232	177	234	269	254
CP039343_4028180_4028250	4.36812	-1.60859	0.930888	-1.72802	0.0839855	NA	12	6	4	1	1	4	3	4	5
EA665_012500|SDR_family_NAD(P)-dependent_oxidoreductase	57.7165	-0.50583	0.292861	-1.7272	0.0841316	0.333692	72	70	70	25	43	57	45	65	80
EA665_008170|hypothetical_protein	4.53406	-1.47257	0.852727	-1.7269	0.0841861	NA	6	8	9	2	2	3	4	4	4
CP039343_1229629_1229698	36.5981	-0.538225	0.311728	-1.72658	0.0842426	0.333811	41	52	41	22	40	18	46	41	38
EA665_000210|2,5-didehydrogluconate_reductase_DkgB	77.8127	-0.393825	0.228174	-1.72599	0.0843499	0.333915	95	89	102	43	86	58	70	94	78
EA665_007025|copper_chaperone	133.201	-0.301123	0.174602	-1.72462	0.084596	0.334568	166	153	166	107	128	102	99	151	148
CP039343_1853758_1853861	5.00628	-1.46134	0.84777	-1.72374	0.0847543	NA	14	8	4	4	1	3	4	3	5
EA665_007355|hypothetical_protein	161.348	0.275532	0.160004	1.72203	0.0850633	0.336094	146	163	147	171	159	141	145	191	202
EA665_015925|ribonucleotide-diphosphate_reductase_subunit_beta	8031.63	0.115197	0.0669397	1.72091	0.0852674	0.336578	7986	7933	8076	7766	8228	6287	8873	9058	8944
CP039343_3825815_3826120	16.8865	-0.834546	0.485603	-1.71858	0.0856912	0.337591	20	24	28	6	13	15	17	25	7
EA665_010930|YeeE/YedE_family_protein	44.0149	0.482207	0.280655	1.71815	0.0857694	0.337591	32	40	40	47	43	43	51	42	59
EA665_010500|AraC_family_transcriptional_regulator	40.0781	0.519721	0.30249	1.71815	0.0857699	0.337591	36	36	21	41	39	34	44	52	61
CP039343_2414824_2415032	12.6075	0.950118	0.553069	1.7179	0.0858143	NA	12	7	6	16	23	4	16	15	17
EA665_003230|gamma-glutamylcyclotransferase	56.0309	0.456853	0.266038	1.71725	0.0859337	0.337913	36	39	68	58	62	48	55	67	76
EA665_014965|SAM-dependent_DNA_methyltransferase	317.859	0.21271	0.124002	1.71538	0.0862753	0.33863	309	331	294	340	338	251	362	323	340
CP039343_940209_940525	73.079	-0.410299	0.239195	-1.71534	0.0862837	0.33863	87	81	88	35	75	55	71	91	89
EA665_015095|thioesterase_family_protein	77.2205	0.388679	0.226648	1.7149	0.0863629	0.33863	65	76	70	103	87	49	70	88	97
CP039343_1332217_1332287	5.51439	-1.37156	0.799858	-1.71475	0.0863905	NA	11	9	10	5	3	2	6	0	5
CP039343_949676_949771	7.45069	1.20052	0.700156	1.71464	0.0864103	NA	6	5	3	6	9	12	4	14	7
CP039343_3683344_3683412	4.15153	-1.7231	1.00499	-1.71454	0.0864289	NA	9	2	8	2	2	1	4	9	2
EA665_018155|PAS_domain-containing_sensor_histidine_kinase	40.4554	0.551039	0.321408	1.71446	0.0864448	0.33863	43	25	27	49	35	35	58	57	36
EA665_015815|cold_shock_domain-containing_protein	324.933	-0.206304	0.120363	-1.71401	0.0865269	0.33863	393	350	339	275	302	228	339	374	376
EA665_018705|NAD-dependent_malic_enzyme	682.474	0.224947	0.131389	1.71207	0.0868839	0.339583	631	682	624	740	690	514	929	707	684
EA665_010760|hypothetical_protein	464.018	0.186147	0.108744	1.71179	0.0869352	0.339583	475	471	417	455	534	348	472	542	518
CP039343_1408567_1408629	8.88574	1.21768	0.712387	1.7093	0.0873958	NA	2	14	2	11	6	17	11	9	5
EA665_007200|HAD-IIIA_family_hydrolase	257.387	-0.220824	0.129215	-1.70897	0.0874571	0.341298	270	308	325	237	237	189	267	270	250
EA665_008890|methionine_adenosyltransferase	1214.31	0.146047	0.0855148	1.70786	0.087663	0.341778	1158	1187	1242	1252	1243	914	1329	1345	1395
CP039343_4011343_4011732	5194.51	0.122099	0.071591	1.70551	0.0881001	0.342805	5053	5259	4957	4786	5404	4057	6006	5900	5911
EA665_011275|heme-binding_protein	504.186	0.21304	0.124919	1.70543	0.0881135	0.342805	503	477	466	410	615	417	517	659	531
CP039343_980681_980761	2.89181	2.15603	1.26441	1.70517	0.0881625	NA	0	2	1	1	4	6	6	4	1
EA665_013765|elongation_factor_Ts	4451.9	0.142096	0.0833361	1.7051	0.088176	0.342805	4281	4380	4383	4515	4613	3260	5306	4954	4888
EA665_000300|phosphoribosylaminoimidazolesuccinocarboxamide_synthase	1376.78	0.134313	0.0788311	1.7038	0.0884178	0.342876	1286	1427	1399	1325	1452	1091	1500	1583	1477
EA665_016730|DNA_polymerase_III_subunit_delta	196.132	0.254649	0.14946	1.70379	0.0884207	0.342876	178	208	199	200	211	184	217	204	172
EA665_002205|cystathionine_beta-lyase	121.966	-0.3049	0.178976	-1.70358	0.0884599	0.342876	139	177	146	104	116	99	117	123	92
EA665_018145|D-alanyl-D-alanine_endopeptidase_PBP7/8	1264.5	-0.190102	0.111613	-1.70322	0.0885271	0.342876	1397	1394	1625	1348	1218	781	1218	1299	1311
EA665_009330|adenylate/guanylate_cyclase_domain-containing_protein	252.608	-0.219446	0.12896	-1.70166	0.0888197	0.343687	278	328	298	230	270	169	237	249	257
EA665_003140|AraC_family_transcriptional_regulator	531.267	0.188612	0.111039	1.69861	0.0893933	0.345093	517	512	553	569	576	406	605	577	517
CP039343_3195217_3195348	621.477	-0.184917	0.108868	-1.69854	0.0894064	0.345093	627	758	745	577	638	401	669	678	607
EA665_013835|EAL_domain-containing_protein	167.229	-0.257843	0.151825	-1.69829	0.0894523	0.345093	189	215	171	137	156	119	169	191	186
EA665_004865|EamA_family_transporter_RarD	47.9825	-0.488118	0.287476	-1.69794	0.0895182	0.345093	47	72	72	49	47	22	54	45	35
CP039343_2742200_2742498	1.91679	-2.46998	1.45669	-1.6956	0.0899611	NA	6	5	2	0	1	1	0	2	1
EA665_012520|molecular_chaperone	51.3728	-0.545659	0.322093	-1.69411	0.0902449	0.34757	69	83	74	20	48	61	24	45	42
EA665_013980|Arc_family_DNA-binding_protein	21.5966	0.705938	0.417746	1.68987	0.0910524	0.350352	10	19	20	17	34	18	34	23	21
CP039343_35085_35164	3.45359	-2.04968	1.21608	-1.68549	0.0918949	NA	6	6	3	1	0	2	7	7	0
EA665_002350|50S_ribosomal_protein_L17	6005.89	0.158123	0.0939163	1.68366	0.0922472	0.354618	5790	5586	5977	5999	5772	4780	7533	6659	6497
EA665_006035|phage_tail_tape_measure_protein	78.4749	-0.411347	0.244389	-1.68316	0.0923439	0.354659	61	102	108	57	60	56	75	123	81
EA665_010810|NAD-dependent_phenylacetaldehyde_dehydrogenase	10.6617	0.988384	0.58773	1.6817	0.0926273	NA	6	5	7	9	15	7	11	21	17
CP039343_839612_839746	2136.72	-0.140126	0.0833877	-1.68042	0.0928763	0.356372	2420	2705	2514	1846	2269	1804	1833	2123	1953
EA665_006660|helix-turn-helix_domain-containing_protein	108.213	-0.307303	0.182942	-1.67979	0.092999	0.35651	124	143	142	101	102	80	97	85	115
CP039343_1295166_1295224	13.9077	0.914947	0.544912	1.67907	0.0931382	0.356712	8	10	8	14	22	7	30	18	10
EA665_004035|CatB-related_O-acetyltransferase	58.9037	-0.42186	0.251514	-1.67729	0.0934865	0.357435	56	70	84	50	46	38	63	81	54
EA665_002315|50S_ribosomal_protein_L15	9981.65	0.160483	0.0956844	1.67722	0.0935004	0.357435	9629	8971	10069	9577	9448	8280	12520	11217	10949
CP039343_2682492_2682692	48.8556	-0.437727	0.261154	-1.67612	0.093714	0.357698	55	55	63	34	47	29	49	63	56
CP039343_3244370_3244515	49.4922	-0.506569	0.302253	-1.67598	0.0937428	0.357698	47	68	80	28	50	39	29	68	47
EA665_007425|SMI1/KNR4_family_protein	69.2282	0.378388	0.226028	1.67408	0.0941154	0.358788	68	53	58	76	71	53	74	93	84
EA665_004075|ATP-dependent_metallopeptidase_FtsH/Yme1/Tma_family_protein	9935.76	-0.147714	0.0882774	-1.67329	0.09427	0.359045	10931	12277	11721	8003	10503	8380	9013	10407	9359
EA665_016885|gluconate_permease	1325.92	0.158203	0.0945802	1.67268	0.0943902	0.359171	1150	1374	1336	1176	1370	1126	1532	1586	1411
EA665_017700|type_IV-A_pilus_assembly_ATPase_PilB	24.093	0.619837	0.370724	1.67196	0.0945319	0.359378	21	16	19	26	28	20	32	24	32
EA665_014215|hypothetical_protein	2.0856	2.62045	1.56851	1.67066	0.0947885	NA	0	2	0	6	5	0	2	0	4
EA665_008655|DUF962_domain-containing_protein	83.6697	-0.340402	0.203991	-1.66871	0.0951746	0.361267	96	104	99	60	86	57	79	88	100
EA665_000450|chloramphenicol/florfenicol_efflux_MFS_transporter_FloR	394.6	0.218712	0.131078	1.66856	0.0952041	0.361267	365	441	382	344	428	400	374	452	383
CP039343_605273_605399	9.91408	-1.04759	0.628489	-1.66683	0.0955473	NA	10	21	10	7	6	4	4	13	18
CP039343_540491_541030	5261.25	0.135071	0.0810946	1.6656	0.0957939	0.363171	4927	5320	5127	4449	5829	4203	6039	6187	5881
EA665_014590|formylglycine-generating_enzyme_family_protein	8.56067	-1.03137	0.62061	-1.66186	0.096541	NA	16	8	14	4	7	5	9	7	9
EA665_018665|F0F1_ATP_synthase_subunit_I	1260.86	-0.158821	0.0955735	-1.66177	0.0965597	0.365543	1384	1433	1494	1073	1223	1001	1390	1284	1215
EA665_004145|phosphoenolpyruvate_carboxykinase_(GTP)	7121.99	-0.131232	0.0789804	-1.66158	0.096597	0.365543	7767	8354	7949	6440	7152	5265	7797	7402	6918
EA665_001500|cation_transporter	83.1528	-0.3582	0.215666	-1.6609	0.0967331	0.365722	109	106	86	54	89	59	73	91	97
EA665_011835|hypothetical_protein	9.2522	1.01421	0.610683	1.66078	0.0967567	NA	7	3	8	8	12	11	8	12	14
EA665_006070|hypothetical_protein	2.14436	2.18661	1.31664	1.66074	0.096765	NA	2	1	0	5	5	2	0	1	3
EA665_015045|hypothetical_protein	7.44622	-1.13196	0.682177	-1.65933	0.0970495	NA	10	14	17	1	9	6	2	7	3
CP039343_2754656_2755285	193.822	-0.265617	0.16011	-1.65897	0.0971221	0.366827	226	206	232	180	194	105	219	237	185
EA665_001980|hypothetical_protein	76.9585	-0.371945	0.224257	-1.65857	0.0972034	0.366827	104	105	95	92	69	42	57	69	74
EA665_002085|inositol_monophosphatase	1005.93	0.150096	0.0905907	1.65686	0.097547	0.367591	947	1061	1018	903	1135	839	1090	1089	1069
EA665_001130|TetR/AcrR_family_transcriptional_regulator	24.085	-0.615337	0.371428	-1.65668	0.0975843	0.367591	42	27	32	20	23	14	14	24	26
EA665_010735|aldehyde_dehydrogenase_(NADP(+))	36.9211	0.509633	0.308282	1.65314	0.0983021	0.369957	24	33	30	45	40	22	44	52	48
CP039343_376814_376890	9.77125	-1.13894	0.689527	-1.65176	0.0985826	NA	9	12	7	7	3	1	15	12	26
EA665_018230|P-II_family_nitrogen_regulator	694.3	0.185276	0.112205	1.65123	0.0986919	0.371085	729	679	654	793	672	545	690	735	813
EA665_014280|hypothetical_protein	26.4346	-0.599657	0.36331	-1.65054	0.0988334	0.371278	38	27	38	16	29	14	20	34	29
EA665_012530|aminopeptidase_N	931.553	-0.168786	0.102331	-1.64942	0.0990624	0.3718	1032	1149	1186	868	1055	662	718	908	952
CP039343_1951900_1952120	2.07342	-2.40853	1.46027	-1.64937	0.0990716	NA	8	4	1	0	0	2	1	2	1
CP039343_1161841_1162084	8.09094	1.14704	0.696173	1.64764	0.0994263	NA	3	8	5	14	13	4	4	6	17
EA665_003995|neutral_zinc_metallopeptidase	384.555	-0.201665	0.12243	-1.64719	0.0995185	0.373172	406	463	515	363	380	288	299	402	402
CP039343_514542_514709	111.76	0.341078	0.207505	1.64371	0.100236	0.375521	94	122	91	95	127	109	110	103	161
CP039343_2365603_2365701	2.10214	2.15699	1.31255	1.64335	0.10031	NA	1	0	2	4	7	1	1	1	2
EA665_013290|hypothetical_protein	125.079	-0.300615	0.18314	-1.64145	0.100704	0.376716	135	172	133	87	127	92	109	149	145
EA665_007725|L-serine_ammonia-lyase	36.0464	0.560985	0.341822	1.64116	0.100764	0.376716	33	24	31	24	43	43	26	54	47
CP039343_2217330_2217624	11.9732	-0.877396	0.534633	-1.64112	0.100773	NA	15	14	14	5	8	7	14	16	18
EA665_009695|YcgL_domain-containing_protein	413.538	-0.177935	0.108449	-1.64072	0.100855	0.376716	472	438	474	369	400	283	425	458	469
CP039343_2410489_2410554	204.003	0.257217	0.156801	1.64041	0.100921	0.376716	191	197	210	235	240	143	165	246	236
CP039343_1865372_1865746	24.0071	-0.633183	0.386323	-1.639	0.101213	0.377465	25	43	30	20	26	9	28	24	18
CP039343_262845_263161	6.15498	1.28083	0.781665	1.63859	0.101299	NA	2	5	4	10	8	5	12	2	7
EA665_004400|ABC_transporter_permease	23.7739	-0.61051	0.372665	-1.63823	0.101374	0.377723	26	34	39	18	25	13	20	29	16
EA665_014500|FAD-dependent_oxidoreductase	296.814	0.194832	0.119013	1.63706	0.101617	0.378013	281	312	282	283	321	253	299	335	332
EA665_004845|diguanylate_cyclase	49.0962	-0.412146	0.251773	-1.63698	0.101635	0.378013	59	63	71	40	46	38	43	46	43
EA665_016125|cation_transporter	34.5467	0.532751	0.325928	1.63457	0.10214	0.379414	32	31	31	53	31	32	35	24	41
EA665_007880|cytosine_permease	3.69677	1.6123	0.986412	1.63451	0.102152	NA	4	2	0	4	8	4	4	5	2
CP039343_1589874_1590407	107.566	-0.335096	0.205081	-1.63397	0.102265	0.379414	110	173	136	84	121	80	68	108	108
EA665_003845|serine--tRNA_ligase	1157.78	-0.132196	0.08091	-1.63386	0.102288	0.379414	1237	1295	1352	1069	1148	827	1172	1282	1209
CP039343_3693653_3693757	7.52855	-1.08923	0.666921	-1.63322	0.102422	NA	11	11	15	10	3	2	5	6	7
EA665_006880|ATP-dependent_chaperone_ClpB	2832.15	-0.326631	0.200195	-1.63156	0.102772	0.380867	3157	4319	3819	2114	3207	2369	1678	2748	2505
EA665_002155|putative_multidrug_efflux_protein_AdeT2	61.9763	-0.391387	0.23997	-1.63098	0.102894	0.380977	75	74	72	40	57	47	57	84	63
EA665_016945|Fe2+-dependent_dioxygenase	157.791	0.255427	0.156764	1.62937	0.103234	0.381642	158	136	166	153	193	127	160	172	170
EA665_010925|YeeE/YedE_family_protein	52.8393	0.42577	0.261328	1.62925	0.103259	0.381642	46	35	55	64	53	40	60	66	61
EA665_013565|NUDIX_domain-containing_protein	48.0852	-0.437589	0.269008	-1.62668	0.103805	0.383317	66	59	57	29	48	38	47	42	54
CP039343_2507468_2507923	4.36014	1.59468	0.980419	1.62653	0.103836	NA	2	4	0	2	11	3	5	5	8
EA665_015535|3-oxoacyl-ACP_reductase_FabG	4011.93	0.169571	0.104289	1.62597	0.103956	0.38352	3777	3974	3763	3932	4123	3060	5353	4265	4254
EA665_019785|hypothetical_protein	228.322	0.271512	0.167028	1.62554	0.104047	0.38352	213	225	193	283	223	151	294	233	264
EA665_008855|XRE_family_transcriptional_regulator	27.0407	-0.592355	0.364912	-1.62328	0.10453	0.384956	30	47	36	14	22	27	17	28	26
CP039343_2825214_2825285	3.20425	1.84348	1.13617	1.62253	0.10469	NA	1	3	1	10	6	0	5	1	2
CP039343_3999694_3999902	2.52736	1.97331	1.21663	1.62195	0.104814	NA	2	0	2	5	2	6	3	0	1
CP039343_286539_286710	18.4988	-0.737967	0.455267	-1.62095	0.105028	0.386445	26	23	24	10	12	15	23	9	27
CP039343_2566171_2566350	10.9216	0.904377	0.558255	1.62001	0.105231	NA	9	9	8	16	16	10	9	4	17
EA665_009355|Fe-S_cluster_assembly_scaffold_IscU	665.87	-0.155564	0.0960519	-1.61959	0.105321	0.38718	751	768	784	638	649	487	655	729	623
EA665_000460|IS91-like_element_ISVsa3_family_transposase	60.0106	0.401449	0.248518	1.61537	0.106231	0.390175	51	57	65	54	66	73	62	53	56
CP039343_723264_723400	3.27255	2.08095	1.28836	1.61519	0.106269	NA	1	0	2	9	1	1	2	11	3
EA665_006840|adenylosuccinate_synthase	3958.59	-0.116984	0.0724985	-1.61361	0.106613	0.391052	4305	4645	4485	3687	3945	2986	4108	4031	3938
EA665_003105|hemolysin_III	73.6063	0.389338	0.241316	1.61339	0.106659	0.391052	65	75	48	62	103	49	76	96	101
EA665_008860|N-acetyltransferase_family_protein	193.15	-0.23138	0.143611	-1.61116	0.107145	0.392108	220	228	238	155	193	152	167	201	212
CP039343_2140481_2140646	7.1314	1.12237	0.696717	1.61094	0.107193	NA	3	6	5	8	10	8	5	5	14
EA665_018570|peptide_deformylase	710.269	0.178252	0.110671	1.61065	0.107256	0.392108	664	707	737	698	817	540	840	796	669
CP039343_2618143_2618240	40.4789	-0.486468	0.302144	-1.61005	0.107386	0.392108	54	49	36	33	28	24	53	40	55
CP039343_643008_643182	41.1684	-0.455397	0.282864	-1.60995	0.107409	0.392108	56	68	51	29	51	30	27	37	29
CP039343_1385827_1385961	5.28398	1.33264	0.827895	1.60967	0.10747	NA	7	1	2	11	7	4	7	3	5
EA665_009525|sulfite_exporter_TauE/SafE_family_protein	73.2329	0.369727	0.2297	1.60961	0.107484	0.392108	57	72	68	61	85	71	97	79	72
EA665_019395|hypothetical_protein	35.9594	-0.527662	0.327852	-1.60945	0.107518	0.392108	27	48	63	25	34	23	35	45	32
CP039343_1541283_1541360	11.9019	0.874918	0.543834	1.6088	0.107661	NA	4	14	8	14	11	15	15	11	14
CP039343_2217859_2218243	8.37454	1.09324	0.679826	1.60812	0.107809	NA	4	5	6	15	10	3	6	11	17
EA665_000885|orotate_phosphoribosyltransferase	299.312	0.229674	0.142948	1.60669	0.108122	0.393962	295	249	307	349	310	203	344	329	342
EA665_006615|DUF262_domain-containing_protein	14.7578	0.742559	0.462333	1.60611	0.10825	0.394078	13	13	12	25	19	11	14	10	16
EA665_005265|lactoylglutathione_lyase	327.971	0.191386	0.119219	1.60533	0.10842	0.394352	345	335	294	342	357	257	333	361	360
EA665_011905|hypothetical_protein	10.7887	0.895649	0.558251	1.60438	0.10863	NA	8	8	9	19	12	9	8	7	17
CP039343_69831_70352	42.3058	0.448376	0.279553	1.60391	0.108735	0.395076	32	44	41	51	44	41	34	45	50
EA665_012175|hypothetical_protein	14.6933	0.785641	0.489936	1.60356	0.108811	0.395076	8	11	13	18	15	14	21	10	22
EA665_002655|4-hydroxythreonine-4-phosphate_dehydrogenase_PdxA	253.846	-0.205738	0.128507	-1.60099	0.10938	0.396792	271	294	298	205	248	188	242	282	297
CP039343_782781_783006	4.97642	-1.37407	0.858371	-1.60078	0.109425	NA	11	5	8	3	3	2	8	5	1
EA665_018630|F0F1_ATP_synthase_subunit_beta	11666.6	0.151401	0.0946051	1.60034	0.109522	0.396959	10993	11471	11617	10562	11829	9875	14540	13242	11852
EA665_010325|outer_membrane_porin,_OprD_family	16.2674	0.767551	0.479754	1.59988	0.109624	0.396979	6	11	16	14	13	20	20	25	21
EA665_018890|enoyl-CoA_hydratase	159.93	0.281207	0.175979	1.59796	0.110052	0.39786	130	155	149	186	176	95	161	196	218
EA665_010120|hypothetical_protein	52.2161	-0.402102	0.251641	-1.59792	0.110061	0.39786	70	70	66	53	54	28	39	50	51
EA665_018150|response_regulator	362.629	0.211862	0.132655	1.59709	0.110247	0.398183	329	377	384	435	353	292	327	368	429
EA665_011720|hypothetical_protein	3.84445	1.63037	1.02094	1.59693	0.110281	NA	3	1	1	3	4	6	3	4	9
EA665_001360|hypothetical_protein	10.8873	0.935097	0.58569	1.59657	0.110361	NA	12	6	6	9	15	15	18	6	9
EA665_009620|YARHG_domain-containing_protein	491.436	-0.16361	0.102486	-1.59641	0.110397	0.398375	552	585	579	483	462	367	441	517	503
EA665_001240|MFS_transporter	30.7698	-0.548466	0.343673	-1.5959	0.110512	0.398443	34	50	34	23	19	26	22	36	38
CP039343_768677_768917	52.6583	-0.42782	0.268218	-1.59505	0.110702	0.398778	61	63	75	54	48	26	43	47	69
CP039344_30374_31358	9.3211	0.979007	0.61399	1.5945	0.110824	NA	7	7	3	9	13	7	10	13	16
EA665_019270|hypothetical_protein	118.626	-0.279314	0.175232	-1.59396	0.110944	0.399301	130	147	149	114	100	86	105	136	119
EA665_005955|glutamate_5-kinase	6.99433	1.12103	0.70379	1.59284	0.111195	NA	3	5	5	8	8	8	4	13	9
EA665_017305|YafY_family_transcriptional_regulator	41.6454	0.477565	0.299916	1.59233	0.111311	0.400272	43	33	37	32	48	53	44	38	44
EA665_002345|DNA-directed_RNA_polymerase_subunit_alpha	30574.6	0.132312	0.083143	1.59137	0.111525	0.400694	29516	29303	30724	30034	30258	23763	37302	33755	33609
EA665_012385|magnesium-translocating_P-type_ATPase	38.1503	0.47065	0.295875	1.59071	0.111676	0.400885	33	33	32	43	45	29	38	39	55
CP039343_2636876_2637041	85.444	-0.323547	0.203505	-1.58988	0.111863	0.40115	90	119	99	73	80	58	85	80	100
EA665_008000|3-hydroxyacyl-CoA_dehydrogenase	7.37806	1.15879	0.728923	1.58972	0.111897	NA	5	12	0	14	8	10	4	8	4
EA665_012545|hydroxyethylthiazole_kinase	74.2104	-0.33854	0.212983	-1.58951	0.111944	0.40115	92	85	99	56	74	57	69	80	67
EA665_005350|hydrolase	41.7028	-0.436219	0.274609	-1.58851	0.112171	0.401496	59	70	49	40	43	30	24	35	32
CP039343_2245753_2245853	21.6715	0.655852	0.413103	1.58762	0.112372	0.401496	13	26	14	31	20	20	16	33	23
EA665_005145|aldehyde_dehydrogenase_family_protein	1286.64	0.190784	0.12018	1.58749	0.112402	0.401496	1204	1120	1469	1436	1268	1007	1144	1489	1577
CP039343_3151790_3152059	408.435	-0.190198	0.11982	-1.58736	0.112431	0.401496	446	532	456	356	450	278	359	470	401
EA665_015130|exonuclease_SbcCD_subunit_D	48.0895	0.417311	0.263306	1.58489	0.112992	0.403094	43	46	40	56	60	33	56	54	50
EA665_010880|MFS_transporter	7.54835	1.04062	0.656688	1.58465	0.113045	NA	5	5	8	6	11	14	3	6	8
EA665_010795|3-oxoadipyl-CoA_thiolase	24.1762	0.622361	0.392773	1.58453	0.113074	0.403094	19	18	18	25	17	29	21	36	34
EA665_017790|thioesterase_family_protein	38.8753	-0.500247	0.31584	-1.58386	0.113226	0.403247	50	66	39	22	43	29	34	28	46
EA665_008905|polyisoprenoid-binding_protein	349.275	-0.216036	0.136491	-1.58279	0.113469	0.403247	407	460	423	398	343	218	306	298	345
EA665_008125|hypothetical_protein	14.0225	-0.86724	0.547999	-1.58256	0.113522	0.403247	24	16	22	13	1	14	12	14	11
EA665_002505|tRNA_(N6-isopentenyl_adenosine(37)-C2)-methylthiotransferase_MiaB	1685.81	-0.148563	0.0938941	-1.58224	0.113595	0.403247	1742	2074	1910	1325	1792	1307	1594	1902	1777
EA665_002355|NAD(P)/FAD-dependent_oxidoreductase	101.438	0.30044	0.18993	1.58185	0.113684	0.403247	98	91	104	116	112	82	84	117	118
EA665_008865|OXA-51_family_carbapenem-hydrolyzing_class_D_beta-lactamase	3484.47	0.148303	0.0937578	1.58176	0.113704	0.403247	3574	3639	3414	4000	3646	2513	3479	3665	3817
EA665_012005|hypothetical_protein	4.51538	1.39159	0.880181	1.58102	0.113873	NA	3	2	2	6	7	3	6	7	5
CP039343_3170446_3170603	9.65929	0.946987	0.59905	1.58082	0.11392	NA	4	11	6	14	8	12	10	14	7
CP039343_3577298_3577530	385.124	0.17892	0.113318	1.57892	0.114354	0.405206	364	354	363	352	417	284	470	450	460
CP039343_616536_616878	91.9959	-0.297225	0.188554	-1.57634	0.114947	0.406957	120	134	115	79	100	78	69	74	69
EA665_002845|tRNA_guanosine(34)_transglycosylase_Tgt	564.854	-0.157826	0.100185	-1.57534	0.115177	0.40742	598	676	663	522	566	403	595	570	572
EA665_008415|cytochrome_ubiquinol_oxidase_subunit_I	212.155	-0.241984	0.153724	-1.57415	0.115453	0.408047	269	253	278	221	195	163	204	201	148
EA665_000020|DNA_topoisomerase_(ATP-hydrolyzing)_subunit_B	5052.28	-0.106133	0.0674788	-1.57284	0.115756	0.408765	5336	5886	5760	4601	5020	3882	4788	5387	5482
CP039343_1763383_1763450	3.05899	1.73917	1.10638	1.57195	0.115962	NA	1	2	2	1	12	2	3	2	3
CP039343_1066231_1066371	1.55253	-2.65852	1.69152	-1.57167	0.116027	NA	2	4	2	0	1	0	0	2	4
CP039343_3744054_3744298	12.4177	-0.841373	0.535434	-1.57138	0.116093	NA	19	17	21	14	12	2	10	15	6
EA665_012965|transglutaminase_family_protein	204.557	-0.236131	0.150299	-1.57108	0.116165	0.40986	223	227	274	185	189	152	163	231	229
EA665_008400|PLP-dependent_aminotransferase_family_protein	57.2035	-0.381569	0.242973	-1.57042	0.116318	0.410048	64	81	67	44	59	37	47	68	60
EA665_011845|hypothetical_protein	4.7307	1.44876	0.922566	1.57036	0.116331	NA	2	6	0	7	3	8	8	3	4
EA665_002325|50S_ribosomal_protein_L36	6312.49	0.145859	0.0929073	1.56994	0.116429	0.41009	6042	5787	6419	6433	6078	4792	7835	6984	7088
EA665_009315|hypothetical_protein	83.0742	-0.341237	0.217659	-1.56776	0.116937	0.411526	95	101	107	72	88	47	78	110	68
EA665_004815|PaaI_family_thioesterase	48.2923	-0.435723	0.278266	-1.56585	0.117384	0.412746	65	66	61	43	40	38	45	57	26
EA665_011825|ImmA/IrrE_family_metallo-endopeptidase	595.135	0.226577	0.144785	1.56492	0.117601	0.413156	587	591	564	778	608	380	547	654	724
CP039343_1114425_1114593	15.4305	0.721622	0.46208	1.56168	0.118363	0.41548	7	14	18	17	22	16	12	13	20
EA665_001950|succinylglutamate-semialdehyde_dehydrogenase	515.216	0.161732	0.103707	1.55952	0.118874	0.416918	503	505	461	475	526	407	613	599	603
EA665_010340|sugar_phosphate_isomerase/epimerase	5.85401	1.23079	0.789542	1.55887	0.119027	NA	2	3	4	5	7	6	7	12	7
CP039344_15234_15307	37.741	0.462712	0.296868	1.55865	0.11908	0.417288	37	28	33	48	38	30	40	45	43
EA665_013780|OmpW_family_protein	105.177	-0.350503	0.225007	-1.55774	0.119294	0.417682	132	130	139	78	91	97	57	128	108
EA665_016320|anti-anti-sigma_factor_GigB	937.007	-0.13626	0.0875136	-1.55701	0.119468	0.417935	941	1094	1082	815	940	678	951	1020	1056
CP039343_3503316_3503512	16.8601	0.695851	0.447132	1.55625	0.119648	0.418208	12	14	20	18	16	28	13	15	12
CP039343_1512380_1512495	23.2474	0.667219	0.428951	1.55547	0.119835	0.418508	22	21	17	10	39	32	20	30	17
EA665_004470|phosphoribosylglycinamide_formyltransferase	674.117	0.173363	0.11151	1.55468	0.120023	0.418765	659	651	640	667	673	542	852	704	736
EA665_019095|UDP-glucose_4-epimerase_GalE	751.209	-0.141076	0.0907708	-1.5542	0.120138	0.418765	838	869	826	668	755	549	699	848	822
EA665_017565|exonuclease_V_subunit_beta	358.238	0.188407	0.12125	1.55388	0.120213	0.418765	327	335	400	335	401	301	399	380	377
EA665_017050|MotA/TolQ/ExbB_proton_channel_family_protein	864.2	0.190105	0.122416	1.55294	0.120437	0.418859	854	832	811	885	879	679	1149	867	891
EA665_017190|hypothetical_protein	30.3282	0.532251	0.342743	1.55291	0.120444	0.418859	31	21	22	32	28	31	36	44	28
CP039343_2474583_2474789	8.49535	1.06093	0.683405	1.55242	0.120563	NA	2	7	8	14	13	4	4	9	17
EA665_013510|bifunctional_prephenate_dehydrogenase/3-phosphoshikimate_1-carboxyvinyltransferase	1159.56	0.124656	0.0804038	1.55037	0.121053	0.420478	1158	1160	1145	1099	1216	922	1185	1338	1342
EA665_015445|tetratricopeptide_repeat_protein	177.829	-0.251623	0.162325	-1.55012	0.121113	0.420478	197	212	217	167	179	108	138	215	204
EA665_005400|aminopeptidase_P_family_protein	25.8143	0.556076	0.359029	1.54883	0.121422	0.421194	23	18	26	21	40	24	24	31	27
CP039343_4014445_4014836	6.2457	-1.12809	0.728406	-1.54872	0.12145	NA	10	12	13	5	7	2	6	0	3
EA665_010330|MFS_transporter	14.962	0.734704	0.474627	1.54796	0.121632	0.421568	9	10	13	15	20	11	22	15	21
EA665_008455|hypothetical_protein	14.0816	-0.797201	0.515286	-1.54711	0.121838	0.421927	21	22	9	6	14	6	19	18	16
EA665_003940|succinate_dehydrogenase_flavoprotein_subunit	6490.73	-0.113894	0.0737113	-1.54514	0.122312	0.423215	6900	7501	7216	5885	6236	4958	7034	6902	6606
EA665_002320|preprotein_translocase_subunit_SecY	28500.2	0.142788	0.092452	1.54446	0.122477	0.423428	27676	25836	28898	28234	27468	22173	35801	32027	31169
EA665_005725|hypothetical_protein	9.33174	0.89859	0.581852	1.54436	0.122501	NA	6	8	6	10	13	9	12	9	11
CP039343_3988372_3988437	94.2921	-0.330113	0.213993	-1.54263	0.122919	0.424603	120	98	131	95	96	50	91	78	108
CP039343_1445689_1445862	13.2787	-0.791407	0.513876	-1.54007	0.123542	NA	22	20	15	8	17	4	10	10	18
EA665_003405|YdcF_family_protein	36.6034	0.46748	0.30367	1.53943	0.123699	0.426938	32	38	28	51	35	30	39	40	38
EA665_012225|DNA-binding_protein	4.68523	1.31586	0.855558	1.53802	0.124045	NA	6	1	2	4	7	8	3	5	5
EA665_001610|hypothetical_protein	117.434	0.282238	0.183542	1.53773	0.124115	0.42778	132	116	101	128	138	99	131	114	104
EA665_013570|hemin_uptake_protein_HemP	145.331	0.256736	0.166974	1.53758	0.124151	0.42778	141	162	130	169	175	103	148	157	139
EA665_015650|biotin--[acetyl-CoA-carboxylase]_ligase	125.921	0.262343	0.1707	1.53687	0.124326	0.427983	121	115	136	136	142	105	135	136	116
EA665_005320|PaaX_family_transcriptional_regulator	479.538	-0.161333	0.105	-1.53649	0.124417	0.427983	557	568	517	443	484	336	438	529	519
CP039343_3687654_3687774	1.50061	2.49217	1.62236	1.53614	0.124504	NA	2	0	0	6	3	1	1	0	0
EA665_016745|AdeC/AdeK/OprM_family_multidrug_efflux_complex_outer_membrane_factor	71.0288	-0.381383	0.248451	-1.53504	0.124773	0.428849	83	100	84	43	74	58	85	73	49
EA665_009350|iron-sulfur_cluster_assembly_protein_IscA	656.182	-0.153313	0.0999117	-1.53449	0.12491	0.428963	740	792	709	636	664	437	643	677	712
CP039344_33659_33798	3.18709	1.69553	1.10586	1.53322	0.125223	NA	2	2	1	3	7	4	7	0	2
EA665_006865|OsmC_family_protein	412.519	-0.165616	0.108031	-1.53304	0.125265	0.429586	474	480	480	392	392	311	381	459	399
EA665_007265|universal_stress_protein	499.132	-0.231481	0.151048	-1.5325	0.125399	0.429586	598	592	657	598	446	313	376	438	552
CP039343_255213_255546	285.009	-1.12578	0.734612	-1.53248	0.125405	0.429586	472	442	421	303	233	20	221	269	294
EA665_009715|tryptophan_synthase_subunit_beta	198.102	-0.222802	0.145477	-1.53152	0.12564	0.430035	241	238	218	158	196	157	169	218	216
CP039343_2628860_2628928	821.513	-0.166675	0.108958	-1.52972	0.126087	0.431038	921	909	916	773	872	480	846	961	873
EA665_003350|succinyl-diaminopimelate_desuccinylase	362.809	-0.204695	0.133832	-1.52949	0.126142	0.431038	400	473	370	271	357	292	409	366	374
CP039343_953562_953616	2.2513	-1.88594	1.23307	-1.52946	0.12615	NA	4	5	4	1	1	1	2	1	2
CP039343_3453713_3453868	5.37878	-1.351	0.883411	-1.5293	0.126191	NA	7	6	8	1	3	3	6	2	14
EA665_011390|N-acetyltransferase	21.7729	0.62015	0.405748	1.52841	0.12641	0.431122	18	13	18	25	18	21	19	37	28
CP039343_2395319_2395520	30.2382	0.55717	0.364561	1.52833	0.126431	0.431122	25	27	24	44	29	23	23	54	26
CP039343_779161_779344	102.244	-0.297668	0.194844	-1.52772	0.126581	0.431122	124	142	115	85	118	65	91	116	84
EA665_001440|GNAT_family_acetyltransferase	21.7962	-0.642265	0.420433	-1.52763	0.126605	0.431122	32	22	27	16	19	10	31	13	31
EA665_012290|phospholipase_C,_phosphocholine-specific	34.3972	0.518293	0.339356	1.52729	0.12669	0.431122	36	35	18	27	40	41	43	36	32
EA665_005290|EF-P_beta-lysylation_protein_EpmB	173.578	0.227871	0.149532	1.52389	0.127535	0.433388	176	178	155	175	196	141	183	204	170
CP039343_1381135_1381324	3.05641	-1.81683	1.19228	-1.52383	0.127551	NA	5	2	5	1	2	0	4	5	5
EA665_000305|lipoprotein-34_precursor_(NlpB)	1260.14	0.120113	0.078826	1.52377	0.127566	0.433388	1214	1349	1266	1205	1347	1014	1313	1427	1340
CP039343_2236014_2236343	40.9935	-0.546904	0.359093	-1.52301	0.127755	0.433673	55	60	54	40	54	9	30	55	26
CP039343_3049163_3049249	65.7375	0.353917	0.232488	1.5223	0.127933	0.433919	59	65	59	82	63	55	64	85	64
EA665_014035|phage_tail_protein	9.7991	0.873362	0.573952	1.52166	0.128093	NA	9	7	5	10	13	10	13	12	9
CP039343_845540_845642	33.5391	-0.530967	0.349149	-1.52075	0.128323	0.434855	35	37	40	15	41	12	44	47	42
CP039343_539859_539987	36.0867	0.481222	0.316587	1.52003	0.128504	0.434855	34	34	26	37	52	25	32	55	35
EA665_007345|3-hydroxyacyl-CoA_dehydrogenase	30.9811	0.518275	0.340983	1.51994	0.128525	0.434855	20	35	22	40	28	26	33	45	32
EA665_008895|transketolase	4073.2	-0.107562	0.0708113	-1.51899	0.128765	0.435308	4334	4696	4418	3731	4128	2878	4234	4327	4518
CP039343_2298729_2298825	45.418	0.459179	0.302452	1.51818	0.128968	0.435637	36	34	26	45	43	26	70	87	50
EA665_014910|dihydrodipicolinate_synthase_family_protein	2.87907	-1.86649	1.23045	-1.51691	0.129289	NA	2	4	7	2	0	1	4	6	1
CP039343_2006154_2006457	31.9162	-0.523458	0.3453	-1.51595	0.129532	0.437182	44	36	36	16	36	18	24	44	42
CP039343_1931840_1931974	8.12486	-0.95431	0.629552	-1.51586	0.129556	NA	14	9	11	5	5	5	7	9	10
EA665_005990|SH3_domain-containing_protein	58.513	0.368749	0.243359	1.51525	0.12971	0.437425	53	48	47	58	67	40	64	75	83
CP039343_2870594_2870830	698.908	0.178223	0.117697	1.51426	0.129961	0.437914	715	670	688	734	775	515	857	717	688
EA665_000705|phosphatidylserine_decarboxylase	358.599	-0.175851	0.116254	-1.51264	0.13037	0.438934	360	431	409	292	366	254	380	420	375
CP039343_1001997_1002048	2.88011	-1.65477	1.09419	-1.51233	0.13045	NA	8	7	3	4	1	0	1	1	2
CP039343_3906484_3906565	154.5	0.26447	0.174926	1.5119	0.130561	0.439216	147	121	155	143	145	144	159	172	214
CP039343_2227129_2227267	25.3028	-0.551904	0.365318	-1.51075	0.130853	0.439841	37	35	31	20	28	13	31	20	18
CP039343_662696_662749	1.13212	-2.96619	1.96379	-1.51044	0.130931	NA	0	6	4	0	1	0	0	0	0
CP039343_2851309_2851446	2835.93	0.123993	0.0821821	1.50875	0.131362	0.440919	2782	2860	2835	2767	2882	2260	3301	3169	2945
EA665_004290|TetR/AcrR_family_transcriptional_regulator	26.5727	0.564761	0.374386	1.5085	0.131427	0.440919	27	23	18	37	31	19	40	23	22
EA665_011065|PadR_family_transcriptional_regulator	38.3089	0.459327	0.304546	1.50823	0.131495	0.440919	27	33	35	43	33	35	43	59	39
EA665_014380|urease_accessory_protein_UreG	95.2619	0.280357	0.185944	1.50775	0.131619	0.440978	97	100	96	114	107	84	80	96	88
EA665_015355|NAD-dependent_succinate-semialdehyde_dehydrogenase	48.16	0.431678	0.286495	1.50675	0.131874	0.441092	50	38	38	64	51	32	51	44	70
EA665_001365|imidazole_glycerol_phosphate_synthase_subunit_HisF	455.594	0.1575	0.104556	1.50637	0.131971	0.441092	457	446	461	453	507	349	445	513	522
EA665_012635|RNA_chaperone_Hfq	1127.26	0.386201	0.256396	1.50627	0.131997	0.441092	1036	1130	1111	1228	1352	1079	1212	1361	662
EA665_015660|signal_recognition_particle_protein	2065.71	0.116649	0.0774589	1.50594	0.132081	0.441092	2126	2100	2169	2134	2154	1657	2085	2122	2238
CP039343_2281203_2281832	1.79693	2.37402	1.57821	1.50425	0.132516	NA	1	0	1	7	1	1	0	4	1
EA665_005050|DUF962_domain-containing_protein	87.8251	-0.330298	0.219688	-1.50348	0.132714	0.442847	95	94	133	84	85	52	64	101	101
CP039343_3502524_3502692	38.1802	0.460352	0.306344	1.50273	0.132909	0.443137	31	49	31	46	50	35	21	45	38
EA665_006500|GMC_family_oxidoreductase	95.3458	0.29835	0.198597	1.50228	0.133024	0.443162	93	88	84	93	97	88	83	125	114
EA665_012435|hypothetical_protein	7.30655	-1.13874	0.758091	-1.50212	0.133067	NA	8	16	7	9	1	2	8	4	13
CP039343_3238017_3238245	80.0193	-0.314963	0.209953	-1.50016	0.133574	0.44429	94	113	98	76	82	53	71	88	59
CP039343_2695524_2695613	1019.37	-0.136264	0.0908339	-1.50014	0.133578	0.44429	1061	1239	1089	899	1043	710	975	1162	1166
EA665_001690|hypothetical_protein	64.366	-0.343263	0.229192	-1.49771	0.13421	0.445966	82	74	76	60	55	42	64	61	76
EA665_016475|translation_initiation_factor_IF-3	4154.18	0.117189	0.0782766	1.49712	0.134362	0.445966	4066	4266	4208	3779	4449	3414	4604	4789	4230
CP039343_1096463_1096565	23.4328	-0.55569	0.371343	-1.49644	0.13454	0.445966	29	27	28	14	20	15	27	31	25
EA665_009480|N-acetyltransferase	109.234	0.347663	0.23234	1.49635	0.134562	0.445966	108	97	100	142	125	70	159	102	89
EA665_006620|hypothetical_protein	8.2904	0.975355	0.65191	1.49615	0.134614	NA	2	9	6	12	6	10	8	10	11
CP039343_3205289_3205378	30.0187	-0.489396	0.327111	-1.49612	0.134623	0.445966	40	35	38	27	23	19	25	32	37
EA665_018995|hypothetical_protein	577.975	-0.15067	0.100752	-1.49545	0.134796	0.446182	647	643	648	542	555	403	588	593	669
EA665_016010|hypothetical_protein	3.70124	-1.49766	1.00181	-1.49496	0.134925	NA	8	5	4	2	0	3	3	5	4
EA665_006085|phosphoethanolamine--lipid_A_transferase	20.6954	-0.57415	0.384138	-1.49464	0.135007	0.44626	27	28	27	16	16	15	17	22	22
CP039343_1074403_1074678	123.335	0.278917	0.186625	1.49453	0.135037	0.44626	101	103	132	130	104	112	139	144	152
EA665_017475|sulfurtransferase_TusA	46.3219	-0.41101	0.275096	-1.49406	0.13516	0.446308	63	60	44	41	32	34	45	54	51
EA665_010405|hypothetical_protein	11.371	0.835883	0.559671	1.49352	0.1353	NA	9	13	3	13	13	12	13	9	17
EA665_004620|phosphoribosylformylglycinamidine_synthase	7303.63	-0.0971351	0.0650851	-1.49243	0.135586	0.447358	7661	8137	8251	6739	7112	5416	7642	7923	7841
EA665_012765|sensor_histidine_kinase_KdpD	55.0178	-0.374262	0.250954	-1.49136	0.135867	0.447925	52	79	65	38	50	41	58	62	60
EA665_010185|fimbrial_protein	52.1342	-0.373675	0.250692	-1.49057	0.136073	0.448248	54	67	76	45	47	38	45	58	48
CP039343_734002_734129	3.13504	1.8299	1.22806	1.49007	0.136207	NA	1	2	0	1	4	4	7	3	6
EA665_005805|hypothetical_protein	7.2354	1.15698	0.776635	1.48974	0.136294	NA	4	1	7	10	13	1	9	7	15
CP039343_2654915_2655135	93.2416	-0.34199	0.229585	-1.4896	0.136329	0.448733	132	97	117	105	90	43	71	105	100
EA665_016690|bifunctional_diguanylate_cyclase/phosphodiesterase	147.17	0.255801	0.171898	1.4881	0.136725	0.449677	147	146	134	186	154	100	150	169	155
EA665_004780|DNA_repair_protein_RecO	237.809	-0.208445	0.140182	-1.48696	0.137024	0.450301	266	284	252	168	247	180	256	261	263
EA665_011705|acetyl-CoA_carboxylase_biotin_carboxylase_subunit	1093.25	-0.168525	0.11337	-1.48651	0.137145	0.450338	1117	1385	1240	948	1086	816	1284	1136	974
CP039343_891956_892070	3.30718	1.87995	1.2654	1.48565	0.137371	NA	0	2	1	2	8	0	8	7	3
CP039343_1194585_1194646	34.7219	0.531074	0.357571	1.48523	0.137484	0.450951	19	39	31	31	52	28	20	57	41
CP039343_3852024_3852101	2307.05	0.131951	0.0888762	1.48466	0.137634	0.450951	2200	2296	2373	2171	2407	1865	2750	2573	2350
EA665_002910|hypothetical_protein	100.028	-0.28063	0.189032	-1.48456	0.13766	0.450951	115	113	118	76	88	79	99	124	103
EA665_003305|efflux_RND_transporter_permease_subunit	250.733	0.192123	0.129478	1.48383	0.137854	0.451229	238	255	251	224	287	217	245	294	269
CP039343_2996776_2997060	30.1981	0.517447	0.348905	1.48306	0.138059	0.45154	25	18	29	31	36	22	41	47	26
EA665_011385|Lrp/AsnC_family_transcriptional_regulator	5.82635	1.12417	0.758664	1.48178	0.1384	NA	7	3	2	8	5	9	5	5	7
EA665_017425|TIGR03862_family_flavoprotein	97.2421	0.293829	0.198317	1.48161	0.138444	0.451997	94	100	90	89	118	91	113	84	100
EA665_008465|ATP-binding_cassette_domain-containing_protein	17.4669	0.62642	0.422823	1.48152	0.138468	0.451997	14	18	14	25	21	15	12	22	17
EA665_007130|hypothetical_protein	114.783	0.28273	0.190866	1.4813	0.138528	0.451997	110	127	93	113	109	118	119	115	131
CP039343_1428548_1428848	20.871	-0.645317	0.436331	-1.47896	0.139151	0.453672	20	51	20	17	21	12	16	12	24
EA665_007955|MFS_transporter	4.75757	1.26704	0.857152	1.4782	0.139354	NA	1	5	3	5	5	8	2	7	6
EA665_018215|bifunctional_diaminohydroxyphosphoribosylaminopyrimidine_deaminase/5-amino-6-(5-phosphoribosylamino)uracil_reductase_RibD	371.767	-0.195796	0.132605	-1.47654	0.139799	0.455426	395	467	446	264	425	291	343	406	366
CP039343_581563_581786	7.433	-1.0215	0.691997	-1.47616	0.1399	NA	4	13	14	4	5	4	10	6	9
EA665_006970|peroxiredoxin	8231.79	0.119711	0.0811236	1.47567	0.140033	0.455807	7930	9134	8579	7588	9509	6805	7366	9305	8775
CP039343_3622438_3622546	55.9448	0.382612	0.259349	1.47528	0.140138	0.455807	55	39	59	52	79	42	67	59	57
CP039343_3712087_3712195	114.304	0.290176	0.196847	1.47412	0.14045	0.456462	121	103	92	141	101	89	120	147	124
EA665_004970|D-alanyl-D-alanine_carboxypeptidase_PBP6B	352.404	0.179803	0.122059	1.47308	0.14073	0.457012	334	347	359	364	382	267	420	377	357
EA665_004305|formate_dehydrogenase_accessory_sulfurtransferase_FdhD	61.8746	-0.359776	0.244377	-1.47222	0.140962	0.457405	60	78	82	46	66	36	52	80	72
CP039343_3655160_3655450	6.67894	1.07301	0.729318	1.47125	0.141224	NA	1	6	8	13	8	6	3	5	10
EA665_004655|diphthine--ammonia_ligase	77.9516	-0.30875	0.209922	-1.47079	0.141349	0.4583	97	90	106	63	81	59	80	70	66
CP039343_2108452_2108681	60.8432	-0.36656	0.249471	-1.46935	0.141739	0.459147	70	91	54	52	59	33	69	68	65
CP039343_2676023_2676339	891.615	-0.184344	0.125489	-1.469	0.141833	0.459147	1028	1009	979	876	949	489	940	1068	863
CP039343_2543216_2543341	3.43386	1.42779	0.973387	1.46683	0.142422	NA	2	2	2	5	6	3	2	5	4
EA665_013730|lytic_murein_transglycosylase_B	264.527	-0.189382	0.129177	-1.46607	0.14263	0.461366	292	351	297	235	268	203	261	274	235
EA665_003955|hypothetical_protein	1822.31	-0.131482	0.0897459	-1.46505	0.142908	0.46145	1982	2111	2201	1803	1671	1429	1844	1753	1808
EA665_002960|hypothetical_protein	22.2401	-0.538236	0.367495	-1.46461	0.143028	0.46145	28	39	32	16	22	20	14	18	14
EA665_002190|flavohemoprotein	169.665	-0.226553	0.15471	-1.46437	0.143093	0.46145	183	187	194	130	167	117	158	216	207
CP039343_2790008_2790141	211.714	0.212777	0.145307	1.46433	0.143105	0.46145	199	202	239	186	250	198	193	232	221
EA665_000215|LysR_family_transcriptional_regulator	33.8638	0.487364	0.333148	1.46291	0.143493	0.462162	33	34	21	43	36	27	23	48	43
CP039343_3855956_3856060	1029.57	-0.145112	0.0992086	-1.4627	0.143549	0.462162	1131	1179	1245	842	1055	848	1065	1058	961
EA665_010830|flavin_reductase	20.8061	0.689687	0.471772	1.46191	0.143767	0.4625	26	5	17	22	21	23	16	38	19
EA665_010605|MFS_transporter	23.4477	0.543018	0.371774	1.46061	0.144121	0.462597	16	22	18	21	29	20	30	30	27
CP039343_3836435_3836505	17.8894	0.640476	0.438498	1.46061	0.144121	0.462597	13	15	12	14	20	19	16	30	23
CP039343_1382397_1382466	151.233	-0.263148	0.180168	-1.46057	0.144133	0.462597	168	206	171	127	139	121	114	141	196
EA665_003500|rod_shape-determining_protein	1417.04	0.12247	0.0839383	1.45904	0.144553	0.463582	1285	1491	1521	1398	1513	1102	1524	1527	1549
CP039343_347173_347512	8.60257	-1.02566	0.703041	-1.45889	0.144595	NA	18	12	6	4	12	0	12	9	8
EA665_017920|50S_ribosomal_protein_L1	12004.5	0.111515	0.076521	1.45732	0.145028	0.464744	11805	12052	12161	11479	12385	9479	13998	13180	12727
EA665_010415|GH3_auxin-responsive_promoter	17.5748	0.658455	0.452221	1.45605	0.14538	0.465509	9	14	16	23	12	17	26	21	20
CP039343_3186258_3186416	57.1014	-0.377751	0.259577	-1.45525	0.145599	0.465561	57	59	85	57	38	37	60	69	62
EA665_019330|isoleucine--tRNA_ligase	2303.73	0.107984	0.0742069	1.45517	0.145622	0.465561	2166	2398	2389	2099	2478	1844	2446	2670	2505
EA665_018000|H-NS_histone_family_protein	354.576	0.182706	0.125654	1.45404	0.145934	0.466197	322	320	367	313	400	272	347	478	421
EA665_010130|phospholipase_D_family_protein	19.6142	-0.611566	0.420988	-1.45269	0.146309	0.466723	23	33	20	19	16	8	17	18	28
EA665_015565|segregation/condensation_protein_A	384.535	-0.170703	0.117513	-1.45263	0.146325	0.466723	440	419	463	361	332	308	378	419	385
CP039343_3822639_3822853	241.857	-0.208008	0.143376	-1.45078	0.14684	0.468003	294	306	255	208	229	195	218	290	213
EA665_000530|IS3-like_element_ISAba21_family_transposase	115.239	0.260355	0.179658	1.44917	0.14729	0.468806	98	112	122	101	134	105	119	138	117
CP039343_2362954_2363079	29.2675	0.517984	0.357487	1.44896	0.14735	0.468806	31	20	25	39	33	22	19	33	44
EA665_008425|hypothetical_protein	328.238	-0.206727	0.142703	-1.44866	0.147433	0.468806	413	349	404	369	283	217	323	326	315
EA665_010705|MerR_family_transcriptional_regulator	27.8711	0.506279	0.34958	1.44825	0.147547	0.468807	29	22	19	26	38	22	35	27	35
EA665_012330|chlorhexidine_efflux_PACE_transporter_AceI	3.29841	-1.47662	1.0199	-1.44781	0.14767	NA	6	7	3	1	3	1	3	4	3
CP039343_3142493_3142686	4.17002	-1.25627	0.867778	-1.44768	0.147706	NA	7	8	7	4	3	1	2	2	5
EA665_014785|poly-beta-1,6-N-acetyl-D-glucosamine_N-deacetylase_PgaB	324.336	-0.166032	0.114807	-1.44619	0.148124	0.469793	344	371	374	289	315	229	320	380	349
EA665_013795|Si-specific_NAD(P)(+)_transhydrogenase	865.48	0.132149	0.0913786	1.44617	0.14813	0.469793	819	917	870	820	991	649	854	1023	960
CP039343_515273_515409	108.619	0.297807	0.205964	1.44592	0.1482	0.469793	105	87	103	77	141	94	104	145	134
EA665_010980|3-oxoadipate_enol-lactonase	34.4896	0.466907	0.323118	1.445	0.148456	0.470245	26	28	30	29	31	38	40	53	36
CP039343_1011168_1011279	3.07728	-1.60792	1.11375	-1.44369	0.148826	NA	6	5	6	1	4	0	5	2	0
EA665_017995|general_secretion_pathway_protein	157.467	0.22614	0.156654	1.44357	0.148861	0.471163	139	141	162	160	165	119	188	176	184
EA665_016415|integration_host_factor_subunit_alpha	941.98	-0.130894	0.0907552	-1.44228	0.149224	0.471952	1035	1065	1105	861	894	745	841	1025	1027
EA665_012780|potassium-transporting_ATPase_subunit_KdpA	28.6258	-0.47123	0.326933	-1.44136	0.149482	0.472405	36	49	38	27	28	21	22	25	16
CP039343_1274006_1274215	166.661	0.256226	0.17789	1.44036	0.149765	0.472475	131	144	198	195	172	119	153	201	208
EA665_009280|3'(2'),5'-bisphosphate_nucleotidase_CysQ	228.882	-0.210107	0.145899	-1.44009	0.149843	0.472475	250	240	278	184	213	171	201	301	260
EA665_019700|hypothetical_protein	18.5925	-0.606119	0.420959	-1.43985	0.149909	0.472475	26	23	27	12	19	12	17	11	24
CP039343_2954152_2954423	1.85204	2.02093	1.40369	1.43973	0.149944	NA	0	2	1	1	9	1	1	1	1
EA665_003115|GNAT_family_N-acetyltransferase	32.384	0.439386	0.305201	1.43966	0.149963	0.472475	32	35	28	40	37	33	28	29	29
CP039343_1630255_1630407	14.1165	-0.810259	0.563284	-1.43846	0.150305	0.4725	6	18	29	15	7	4	13	17	23
CP039343_3317521_3317577	501.874	0.190591	0.132499	1.43844	0.15031	0.4725	425	492	478	464	519	382	722	566	521
EA665_015820|uracil_phosphoribosyltransferase	772.69	-0.131126	0.0911599	-1.43842	0.150315	0.4725	809	930	872	698	728	609	750	834	823
CP039343_2405399_2405495	4.3391	1.42573	0.991361	1.43815	0.15039	NA	1	4	1	4	1	8	5	6	8
EA665_003120|patatin_family_protein	108.786	-0.256899	0.178694	-1.43765	0.150535	0.472831	129	130	126	101	97	78	111	121	102
EA665_018130|DsbC_family_protein	301.556	-0.178119	0.123974	-1.43674	0.150791	0.473047	346	367	354	287	310	214	311	304	263
EA665_002130|TIGR00730_family_Rossman_fold_protein	194.191	0.215701	0.150173	1.43635	0.150903	0.473047	177	190	189	192	186	172	190	261	207
EA665_005785|hypothetical_protein	153.349	0.233468	0.16256	1.43619	0.150948	0.473047	147	146	154	164	170	118	136	165	197
EA665_003180|thiolase_family_protein	227.42	-0.201099	0.140083	-1.43558	0.151123	0.473235	234	255	307	209	205	177	222	230	237
EA665_003685|DcaP-like_protein	2565.76	0.12609	0.0878803	1.43479	0.151346	0.473573	2586	2476	2455	2636	2554	1866	3022	2979	2818
EA665_010460|AraC_family_transcriptional_regulator	4.86465	1.29272	0.901643	1.43374	0.151647	NA	1	2	4	6	7	2	4	8	11
EA665_011965|hypothetical_protein	1.42949	2.56557	1.79103	1.43246	0.152013	NA	0	1	0	1	0	4	2	1	3
EA665_016965|sel1_repeat_family_protein	1208.68	-0.12354	0.0862622	-1.43215	0.152101	0.475574	1294	1372	1461	1091	1246	913	1067	1334	1272
EA665_008375|malonate_decarboxylase_holo-ACP_synthase	12.8373	0.702364	0.490585	1.43169	0.152234	NA	12	9	13	13	17	17	11	8	14
CP039343_3102507_3102562	28.2885	-0.535096	0.374112	-1.43031	0.152628	0.476861	27	43	28	12	21	24	27	33	45
EA665_018400|outer_membrane_porin,_OprD_family	3157.03	-0.119123	0.0833273	-1.42958	0.152836	0.477029	3443	3709	3441	2740	3220	2400	3396	3476	3005
EA665_012130|HNH_endonuclease	16.9427	-0.671988	0.470146	-1.42932	0.152913	0.477029	15	24	27	14	9	12	25	10	19
EA665_014040|hypothetical_protein	2.39106	2.14697	1.50339	1.42808	0.153268	NA	1	1	0	0	7	1	7	3	2
EA665_015665|cytochrome_C_assembly_protein	83.3076	-0.282569	0.198358	-1.42454	0.154289	0.479931	92	106	108	72	85	59	81	83	77
EA665_013010|bifunctional_phosphoribosylaminoimidazolecarboxamide_formyltransferase/IMP_cyclohydrolase	3518.2	-0.0985545	0.0691915	-1.42437	0.154339	0.479931	3651	4102	3897	3210	3523	2599	3647	3755	3767
CP039343_256991_257129	8.81461	-0.893414	0.627426	-1.42393	0.154465	NA	17	10	13	2	6	10	7	9	6
EA665_013545|DUF1315_family_protein	425.41	-0.165092	0.115945	-1.42389	0.154479	0.479931	466	541	493	417	422	309	371	392	478
EA665_018515|GNAT_family_N-acetyltransferase	19.2028	-0.597037	0.419315	-1.42384	0.154494	0.479931	20	33	18	12	15	13	22	24	20
EA665_014530|monofunctional_biosynthetic_peptidoglycan_transglycosylase	141.662	-0.242065	0.170043	-1.42355	0.154576	0.479931	162	146	176	142	116	93	141	156	166
EA665_009550|lipid-A-disaccharide_synthase	128.205	-0.24033	0.168829	-1.42351	0.154588	0.479931	137	155	159	120	129	80	117	138	143
EA665_015360|ring-hydroxylating_oxygenase_subunit_alpha	64.6829	0.366143	0.257321	1.4229	0.154764	0.479931	62	66	45	80	66	46	93	69	60
EA665_000930|cell_division_protein_FtsA	2619.12	-0.101319	0.071208	-1.42287	0.154775	0.479931	2811	2907	2995	2303	2667	1993	2533	2903	2820
EA665_007380|LysR_family_transcriptional_regulator	29.1545	-0.474055	0.333491	-1.42149	0.155173	0.480804	33	36	40	19	26	22	23	36	33
CP039343_2794048_2794174	1.21792	2.64661	1.86251	1.42099	0.155319	NA	0	1	0	4	2	0	2	0	2
EA665_004580|cell_envelope_integrity_protein_TolA	440.471	-0.174264	0.122652	-1.4208	0.155376	0.481069	441	516	552	367	475	309	495	458	420
EA665_010635|TetR/AcrR_family_transcriptional_regulator	1.63115	2.24424	1.58017	1.42025	0.155535	NA	0	0	2	2	3	3	3	1	0
EA665_004540|DUF3106_domain-containing_protein	275.791	-0.185749	0.130919	-1.41882	0.155953	0.482493	283	358	342	253	272	214	248	308	242
EA665_005520|threo-3-hydroxy-L-aspartate_ammonia-lyase	11.4395	0.769612	0.542543	1.41853	0.156037	NA	6	10	8	12	13	10	10	15	20
EA665_014390|urease_accessory_protein_UreE	36.3372	0.416772	0.293856	1.41829	0.156106	0.482606	34	40	29	42	44	32	33	42	33
EA665_007435|hypothetical_protein	2.78921	1.5407	1.08652	1.41801	0.156188	NA	1	3	1	3	3	6	2	3	2
CP039343_3733664_3733739	10.3385	0.831647	0.586509	1.41796	0.156202	NA	8	8	7	4	18	13	10	14	11
EA665_008395|LysR_family_transcriptional_regulator	32.561	-0.475458	0.335374	-1.41769	0.15628	0.482782	46	30	43	29	28	17	24	47	37
CP039343_197110_197201	6.40727	-1.08627	0.766537	-1.41712	0.156448	NA	9	6	7	2	5	2	10	12	7
CP039343_3023751_3023857	1.7286	1.95394	1.37948	1.41643	0.15665	NA	1	2	0	2	5	3	1	1	0
EA665_019040|Fe/S-dependent_2-methylisocitrate_dehydratase_AcnD	1150.34	-0.136198	0.0961629	-1.41633	0.15668	0.483339	1189	1307	1304	976	1056	913	1269	1353	1132
EA665_004740|Do_family_serine_endopeptidase	150.353	0.308455	0.217794	1.41627	0.156695	0.483339	116	142	169	222	158	80	165	153	169
CP039343_7335_7585	8.18464	0.941978	0.665264	1.41595	0.156791	NA	8	6	5	20	9	3	10	7	6
CP039343_2229034_2229192	16.748	-0.633673	0.447549	-1.41587	0.156813	0.483339	22	17	22	8	17	9	20	18	22
EA665_006110|UPF0149_family_protein	500.391	-0.1443	0.102007	-1.41462	0.157181	0.484114	528	591	578	439	486	388	517	508	533
CP039343_1746584_1746681	6.36177	-1.06353	0.752436	-1.41345	0.157524	NA	7	11	13	3	8	2	2	11	3
CP039343_2662224_2662422	14.5311	0.691708	0.489523	1.41303	0.157648	0.48475	12	5	17	14	18	15	13	18	19
EA665_006305|hypothetical_protein	170.31	0.210857	0.149244	1.41284	0.157704	0.48475	167	176	164	175	180	147	188	177	170
CP039343_653564_653696	15.5046	0.693796	0.49133	1.41208	0.157927	0.48475	4	16	15	17	16	15	22	22	13
CP039343_211046_211158	160.27	-0.490851	0.347754	-1.41149	0.158101	0.48475	181	198	173	97	201	53	182	206	204
EA665_002980|hypothetical_protein	16.6251	-0.657177	0.465666	-1.41126	0.158167	0.48475	15	28	32	9	21	11	9	20	9
EA665_012505|glutathione_S-transferase_family_protein	67.2933	-0.389673	0.276133	-1.41118	0.158192	0.48475	78	78	87	34	51	70	51	92	72
EA665_012120|hypothetical_protein	6.7838	0.947015	0.671137	1.41106	0.158227	NA	5	7	4	8	8	10	4	7	7
EA665_002670|DUF2147_domain-containing_protein	127.85	-0.254599	0.180499	-1.41053	0.158384	0.48475	147	160	144	127	110	87	99	157	142
EA665_012940|30S_ribosomal_protein_S18	10571.6	0.109074	0.0773311	1.41049	0.158396	0.48475	10560	10583	10791	10426	10966	8172	12160	11402	11186
EA665_000205|MFS_transporter	74.0025	-0.29723	0.210764	-1.41025	0.158466	0.48475	84	88	96	57	75	55	68	80	75
EA665_014790|FKBP-type_peptidyl-prolyl_cis-trans_isomerase	104.642	0.265943	0.188623	1.40992	0.158564	0.48475	98	100	106	119	119	77	111	97	125
EA665_018985|hypothetical_protein	91.7841	-0.284958	0.202199	-1.4093	0.158747	0.484948	109	93	96	72	72	65	94	114	127
EA665_015765|HlyD_family_secretion_protein	53.6677	-0.372675	0.264537	-1.40878	0.1589	0.485056	59	62	74	46	40	42	63	64	40
CP039343_1935436_1935636	31.3676	-0.566531	0.402419	-1.40782	0.159185	0.485239	40	35	39	17	40	11	15	48	49
EA665_011800|hypothetical_protein	35.3236	0.442036	0.313994	1.40778	0.159195	0.485239	31	25	27	40	33	24	49	51	42
EA665_017810|fatty_acid_oxidation_complex_subunit_alpha_FadB	3512.24	-0.118304	0.0840613	-1.40735	0.159323	0.485269	3771	3926	4118	3561	3363	2436	3311	3953	3696
EA665_018685|metal_ABC_transporter_permease	181.547	0.208625	0.148332	1.40648	0.159582	0.485701	183	210	177	184	198	179	173	173	162
EA665_003765|hypothetical_protein	112.126	0.306946	0.218386	1.40552	0.159867	0.486022	120	109	100	171	114	68	106	123	110
CP039343_2271692_2271808	3.82709	1.33279	0.948538	1.4051	0.159993	NA	4	0	4	8	3	6	4	2	2
EA665_013605|ferredoxin--NADP_reductase	414.223	0.167352	0.119121	1.40489	0.160054	0.486022	381	393	457	426	415	341	466	418	465
EA665_012740|MFS_transporter	165.025	-0.221893	0.157963	-1.40472	0.160105	0.486022	190	205	182	173	145	107	161	186	163
EA665_004720|endolytic_transglycosylase_MltG	233.271	-0.200339	0.142659	-1.40431	0.160225	0.486022	255	240	294	204	242	147	266	252	240
EA665_001015|putative_porin	59.7845	-0.330317	0.235245	-1.40414	0.160277	0.486022	68	76	70	55	52	39	54	62	73
EA665_002010|hypothetical_protein	38.3205	-0.428366	0.305551	-1.40195	0.160931	0.487493	51	52	40	24	38	29	44	45	28
EA665_015240|cell_division_topological_specificity_factor_MinE	633.788	-0.14614	0.104258	-1.40172	0.160999	0.487493	740	734	657	529	630	490	587	750	677
EA665_006805|translesion_error-prone_DNA_polymerase_V_autoproteolytic_subunit	8.05337	0.909137	0.648981	1.40087	0.161253	NA	3	6	9	12	10	7	4	13	9
CP039343_2768186_2768240	1198.49	0.12193	0.0870594	1.40054	0.161351	0.4882	1193	1245	1152	1147	1299	913	1305	1443	1232
CP039343_1618654_1618849	7.35062	1.00816	0.719948	1.40032	0.161416	NA	4	2	8	7	15	3	6	11	12
EA665_013095|paraquat-inducible_protein_A	58.4952	-0.372592	0.266183	-1.39975	0.161587	0.488489	68	55	81	33	52	49	49	73	76
EA665_004495|CSLREA_domain-containing_protein	73.4165	0.311951	0.222913	1.39943	0.161684	0.488489	67	77	64	60	98	64	71	92	75
EA665_010850|aromatic_ring-hydroxylating_dioxygenase_subunit_alpha	7.5843	0.962507	0.688474	1.39803	0.162104	NA	4	7	4	9	9	7	3	14	12
EA665_015805|LysR_family_transcriptional_regulator	208.611	-0.199035	0.142371	-1.398	0.162114	0.488557	244	212	264	176	212	151	206	234	210
EA665_012315|hypothetical_protein	195.796	-0.194773	0.139332	-1.39791	0.162141	0.488557	215	235	222	171	194	139	181	215	222
CP039343_3490760_3490907	14.8527	-0.636774	0.455528	-1.39788	0.162148	0.488557	17	27	21	11	16	9	12	9	15
EA665_014795|YaeQ_family_protein	79.067	0.313641	0.224386	1.39778	0.162181	0.488557	71	70	75	102	75	54	92	103	78
CP039343_579524_579583	6.47746	-1.1186	0.801392	-1.39582	0.162768	NA	10	11	2	1	4	4	11	10	7
CP039343_309028_309160	18.9219	-0.59352	0.42524	-1.39573	0.162796	0.490051	22	30	29	8	16	21	13	16	17
CP039343_542836_543169	48225.7	0.101789	0.0729497	1.39534	0.162914	0.490051	48628	52362	49202	46046	50493	41048	50761	48858	50683
CP039343_1228784_1229092	65.6949	-0.310474	0.223172	-1.39119	0.164169	0.493464	68	85	82	52	61	49	63	71	71
CP039343_3773613_3773664	1.99772	1.87259	1.34616	1.39106	0.164207	NA	0	2	1	1	3	5	2	1	2
CP039343_700757_700835	5.50334	-1.14093	0.820368	-1.39076	0.1643	NA	2	14	14	3	8	1	4	3	3
EA665_010995|CoA_transferase_subunit_B	29.8403	0.483094	0.347388	1.39065	0.164332	0.493596	30	25	21	31	33	27	22	49	33
CP039343_1034738_1034839	10.2011	0.878253	0.632755	1.38798	0.165142	NA	10	3	6	4	15	11	17	17	9
CP039343_3591916_3591993	19.4785	0.610753	0.440177	1.38752	0.165284	0.495944	8	19	22	17	22	24	28	17	17
EA665_006680|hypothetical_protein	2.46618	-1.93472	1.3944	-1.38749	0.165294	NA	2	3	4	0	1	1	6	2	4
EA665_016570|NAD(P)-dependent_oxidoreductase	66.9234	0.339974	0.245127	1.38693	0.165464	0.495944	56	66	65	91	74	40	68	65	86
EA665_011950|hypothetical_protein	13.7401	0.701447	0.505852	1.38666	0.165544	0.495944	8	7	16	19	12	12	15	14	21
EA665_019580|N4-gp56_family_major_capsid_protein	849.235	0.121642	0.0877335	1.3865	0.165596	0.495944	823	904	886	869	902	668	825	906	951
EA665_017035|DUF4105_domain-containing_protein	376.4	0.170409	0.123131	1.38397	0.166369	0.497899	428	384	354	357	450	321	365	416	343
EA665_015905|response_regulator	682.25	-0.146966	0.106277	-1.38286	0.166707	0.498549	795	816	812	722	651	504	540	694	696
EA665_016395|thioredoxin	560.513	-0.140309	0.101508	-1.38224	0.166898	0.498756	606	655	632	553	548	377	546	599	617
CP039343_1312662_1312805	7.35376	-0.986145	0.71367	-1.38179	0.167035	NA	10	6	9	3	6	2	10	15	8
EA665_000550|hypothetical_protein	31.677	-0.442753	0.320569	-1.38115	0.167233	0.499397	44	45	35	29	26	23	24	26	38
EA665_019400|MBL_fold_metallo-hydrolase	94.0236	-0.262595	0.190279	-1.38005	0.16757	0.500041	128	121	105	80	98	75	76	87	88
CP039343_3996998_3997258	3.93453	-1.53233	1.1104	-1.37999	0.16759	NA	4	1	12	4	0	1	1	6	8
EA665_002615|acyl-CoA_dehydrogenase	28.7707	-0.472889	0.343178	-1.37797	0.168213	0.501597	34	41	32	26	22	18	37	32	22
EA665_013315|filamentous_hemagglutinin_N-terminal_domain-containing_protein	2439.35	-0.13229	0.096103	-1.37655	0.168653	0.501986	2641	2670	2775	2529	2213	1607	2592	2600	2696
EA665_016735|MacA_family_efflux_pump_subunit	119.607	-0.246573	0.179143	-1.37641	0.168695	0.501986	130	146	145	93	102	106	122	123	122
CP039343_3129948_3130074	21.5563	0.54366	0.394998	1.37636	0.168709	0.501986	17	23	16	29	17	23	25	21	22
CP039344_10233_10296	16.3016	0.621208	0.451634	1.37547	0.168986	0.502448	9	18	14	21	19	14	23	14	15
CP039343_3418559_3418797	38.6998	-0.407922	0.296864	-1.37411	0.169409	0.503341	42	49	48	40	29	21	46	44	37
CP039343_3710363_3710419	7449.51	0.102172	0.0745009	1.37142	0.170245	0.50546	7031	7612	7300	6969	7613	5625	8942	8498	8344
EA665_009510|histidine-type_phosphatase	7.49989	-0.944204	0.688721	-1.37095	0.17039	NA	8	12	9	1	8	4	8	9	11
EA665_016580|ribosome_silencing_factor	1529.22	-0.146684	0.106995	-1.37094	0.170393	0.505536	1680	1867	1829	1160	1644	1333	1395	1612	1415
EA665_000325|MATE_family_efflux_transporter	5.72044	1.10396	0.806277	1.36921	0.170933	NA	2	4	4	6	11	2	7	12	5
EA665_010725|alpha/beta_hydrolase	481.779	0.159442	0.116469	1.36897	0.17101	0.507	435	516	497	413	551	419	441	566	548
EA665_017805|lipid_A_hydroxylase_LpxO	480.097	0.151482	0.110802	1.36714	0.171581	0.50833	466	476	470	510	486	352	554	560	501
EA665_001270|AraC_family_transcriptional_regulator	12.4358	0.782276	0.572533	1.36634	0.171831	NA	10	19	2	19	17	10	16	12	7
CP039343_243130_243435	196.802	0.229761	0.168208	1.36593	0.17196	0.508922	184	186	169	210	233	108	230	268	219
EA665_006790|HNH_endonuclease	47.3519	0.360449	0.263927	1.36572	0.172028	0.508922	42	43	48	41	65	41	49	48	53
EA665_007470|flavodoxin_family_protein	3.93181	1.36569	1.00037	1.36518	0.172197	NA	3	3	1	4	4	7	8	4	0
CP039343_2876608_2876753	280.265	0.194825	0.142862	1.36372	0.172655	0.510409	328	275	243	311	310	214	260	282	326
EA665_011070|alpha/beta_hydrolase	127.446	0.241136	0.176987	1.36245	0.173056	0.511229	125	117	114	137	144	83	127	155	164
CP039343_1068549_1068616	2.05354	-2.25666	1.65711	-1.36181	0.173259	NA	3	1	2	1	0	0	9	1	2
CP039343_3119013_3119119	183.706	0.215118	0.157998	1.36152	0.173349	0.511586	166	216	173	223	185	144	179	180	203
EA665_008805|fimbrial_protein	19.0123	-0.57437	0.421934	-1.36128	0.173425	0.511586	31	26	23	12	12	21	15	19	13
EA665_001700|O-antigen_ligase_domain-containing_protein	8.17052	-0.943256	0.69339	-1.36035	0.173718	NA	11	10	15	2	8	6	1	13	10
EA665_001715|(2Fe-2S)-binding_protein	64.3742	0.317632	0.233553	1.36	0.17383	0.51198	62	56	63	60	86	49	76	72	62
EA665_004585|protein_TolR	202.883	-0.219153	0.161174	-1.35973	0.173915	0.51198	194	236	269	177	202	137	249	208	186
EA665_017535|MerR_family_transcriptional_regulator	92.4438	-0.272368	0.200372	-1.35931	0.174049	0.51198	117	128	106	102	81	66	66	86	93
EA665_013450|cold-shock_protein	8007.54	-0.100925	0.0742486	-1.35929	0.174056	0.51198	8806	8948	8497	6593	8176	6194	8281	8851	8800
EA665_010570|DMT_family_transporter	2.74173	1.6351	1.20302	1.35916	0.174094	NA	3	1	0	6	4	1	1	3	6
CP039343_3989184_3989455	117.116	-0.238307	0.175515	-1.35776	0.174541	0.512692	125	142	150	109	104	89	103	135	114
EA665_001025|transcriptional_regulator	152.385	0.227664	0.16782	1.3566	0.17491	0.512692	148	146	151	130	184	133	181	168	142
CP039343_3158674_3158768	9264.51	0.100252	0.0739064	1.35647	0.174951	0.512692	9058	9016	9461	9078	9127	7089	10684	10455	10445
CP039343_3229565_3229705	260.755	0.197627	0.145698	1.35642	0.174967	0.512692	253	245	243	253	245	226	334	258	306
EA665_013035|hydroxyacylglutathione_hydrolase	93.0003	0.27845	0.205289	1.35638	0.174978	0.512692	87	94	85	96	117	66	77	104	124
CP039343_3589683_3590128	227.285	0.182114	0.134346	1.35556	0.175239	0.512692	217	216	217	198	253	182	240	268	281
EA665_010005|FAD-binding_oxidoreductase	5.37245	-1.11575	0.823139	-1.35548	0.175264	NA	5	7	10	3	6	0	5	7	8
EA665_011060|NADPH-dependent_2,4-dienoyl-CoA_reductase	30.8318	0.440441	0.324947	1.35543	0.175282	0.512692	26	29	25	34	33	26	28	35	44
EA665_007270|O-methyltransferase	103.787	-0.24711	0.182317	-1.35539	0.175294	0.512692	124	120	120	93	96	74	113	108	101
EA665_013305|hypothetical_protein	322.551	-0.165986	0.122499	-1.355	0.175417	0.512692	351	325	386	293	294	225	363	357	357
EA665_005295|elongation_factor_P	3025.43	0.114653	0.0846541	1.35437	0.17562	0.51292	2962	3125	3019	3108	3044	2306	3488	3212	3281
EA665_017925|50S_ribosomal_protein_L11	13493	0.105862	0.0782386	1.35306	0.176036	0.513772	13307	13757	13631	13046	13934	10564	15775	14645	14166
CP039343_838762_838961	26.911	0.475583	0.35208	1.35078	0.176766	0.515536	21	28	22	35	24	25	24	28	36
EA665_014260|hypothetical_protein	1.41515	2.38704	1.76787	1.35024	0.17694	NA	0	1	0	3	2	0	3	1	3
EA665_015940|Darcynin_1	1.71944	-2.26218	1.67694	-1.349	0.177339	NA	4	1	1	0	0	1	3	5	1
EA665_005515|pirin_family_protein	59.5158	-0.324258	0.240426	-1.34868	0.17744	0.516847	81	62	68	51	48	45	56	65	68
CP039343_632344_632499	46.7573	0.362906	0.269174	1.34822	0.177587	0.516847	39	47	46	48	53	44	56	38	51
EA665_006170|BON_domain-containing_protein	323.101	-0.178626	0.132491	-1.34821	0.177592	0.516847	359	371	423	357	291	226	277	335	314
EA665_015335|NAD+_synthase	1198.48	-0.118558	0.0880559	-1.3464	0.178174	0.518176	1205	1428	1384	1031	1277	872	1173	1355	1247
CP039343_3004837_3004941	2.47321	2.0051	1.49032	1.34542	0.178491	NA	0	1	1	6	1	0	2	5	7
EA665_012220|hypothetical_protein	7.5334	0.892644	0.663485	1.34539	0.178501	NA	8	7	4	11	15	5	8	2	8
EA665_003505|rod_shape-determining_protein_MreC	642.955	0.136606	0.101607	1.34445	0.178803	0.519479	603	687	622	650	622	523	725	693	721
EA665_011975|terminase	13.8523	0.682039	0.507468	1.344	0.178947	0.519479	10	8	11	7	20	13	17	19	21
CP039343_1842615_1842693	360.937	-0.162398	0.120846	-1.34384	0.179	0.519479	398	402	416	354	359	225	372	372	412
CP039343_1317847_1318041	9.33668	0.875848	0.652346	1.34261	0.179398	NA	6	12	3	7	10	15	16	8	5
EA665_015315|beta-ketoacyl-ACP_synthase_II	2561.83	0.172385	0.128466	1.34187	0.179638	0.520964	2334	2435	2451	2539	2574	1878	3795	2689	2615
CP039343_2083155_2083346	2.33723	-1.65098	1.23082	-1.34137	0.179802	NA	6	2	6	1	3	0	2	0	2
CP039343_830654_830709	14.1471	-0.713942	0.532457	-1.34084	0.179971	0.521562	10	22	19	5	16	6	18	11	25
EA665_013755|AraC_family_transcriptional_regulator	59.6106	-0.316201	0.235915	-1.34032	0.180142	0.521691	64	78	71	59	52	36	57	66	65
EA665_000495|type_VI_secretion_protein_ImpB	130.276	-0.291424	0.217596	-1.33929	0.180477	0.522293	115	179	157	75	104	129	140	150	137
CP039343_804885_805344	91.8932	0.287354	0.214659	1.33865	0.180684	0.522525	89	92	71	107	106	54	90	110	123
CP039343_3291450_3291544	6.25354	1.11436	0.832852	1.33801	0.180894	NA	8	0	2	10	6	3	7	8	13
EA665_003945|succinate_dehydrogenase_iron-sulfur_subunit	2203.56	-0.107477	0.0803345	-1.33787	0.180938	0.522894	2353	2442	2481	2032	2145	1615	2441	2386	2232
CP039343_855041_855432	1488.32	-0.116385	0.0870239	-1.3374	0.181094	0.522976	1710	1645	1609	1380	1454	1096	1627	1536	1529
CP039343_895340_895734	127.774	-0.231161	0.172967	-1.33645	0.181404	0.523505	156	143	169	133	117	92	99	132	127
CP039343_1467366_1467441	4.46009	1.17992	0.883254	1.33588	0.181589	NA	3	4	1	5	9	2	5	6	6
EA665_010315|hypothetical_protein	17.2835	0.615668	0.460951	1.33565	0.181664	0.523631	16	5	20	20	19	15	21	18	22
CP039343_1477578_1477781	244.901	0.213363	0.159759	1.33553	0.181702	0.523631	249	255	228	177	314	235	247	266	250
EA665_010000|SDR_family_oxidoreductase	1.23594	-2.45702	1.84089	-1.33469	0.181979	NA	0	3	4	0	1	0	0	2	2
EA665_017485|apolipoprotein_N-acyltransferase	284.5	-0.176945	0.132578	-1.33465	0.181992	0.524102	271	338	374	249	297	201	279	318	280
CP039343_2594662_2594743	20.435	-0.547384	0.410354	-1.33393	0.182227	0.524411	25	20	27	15	21	7	26	27	22
CP039343_3139778_3139977	64.7389	-0.345037	0.259213	-1.33109	0.183158	0.526596	91	78	81	80	54	36	39	75	61
CP039343_2752219_2752390	35.3049	-0.410674	0.308582	-1.33084	0.183242	0.526596	44	43	40	27	39	17	33	46	38
EA665_019515|cation_transporter	16.7009	0.582251	0.437729	1.33016	0.183465	0.526819	13	15	12	19	16	16	16	24	20
EA665_003565|PaaX_family_transcriptional_regulator	39.0967	-0.415927	0.312853	-1.32947	0.183694	0.526819	54	46	48	27	38	30	27	59	30
CP039343_2557121_2557194	2.17567	1.80355	1.3566	1.32946	0.183695	NA	2	1	0	2	4	3	5	0	2
CP039343_2153073_2153150	8.21895	0.914974	0.688468	1.329	0.183848	NA	2	8	4	9	4	9	12	14	12
EA665_002975|acyl-CoA_dehydrogenase	1028	-0.172412	0.129732	-1.32898	0.183853	0.526819	1183	1132	1259	1190	918	631	903	1077	1126
EA665_005075|thiamine_phosphate_synthase	152.87	0.208	0.156534	1.32878	0.18392	0.526819	159	159	142	158	183	117	161	158	154
CP039343_217074_217450	2.4022	1.56671	1.17941	1.32838	0.184053	NA	2	1	1	3	3	4	2	4	1
EA665_014925|hypothetical_protein	4.93203	1.13693	0.856473	1.32745	0.184359	NA	4	0	5	6	6	5	8	4	6
CP039343_2230398_2230490	29.702	-0.51193	0.385715	-1.32723	0.184434	0.526819	44	43	31	38	29	6	26	25	34
EA665_005825|hypothetical_protein	3.40107	1.28033	0.964836	1.327	0.18451	NA	2	2	3	5	8	2	2	5	2
EA665_012490|chorismate_mutase	22.5096	-0.530168	0.399588	-1.32679	0.18458	0.526819	28	26	31	18	22	11	12	28	33
EA665_009325|HIT_domain-containing_protein	415.381	-0.139637	0.105259	-1.32661	0.184638	0.526819	466	488	488	383	437	305	406	408	414
EA665_007570|type_VI_secretion_system-associated_protein_TagF	9.36216	0.797589	0.60125	1.32655	0.184657	NA	4	5	12	8	12	11	11	12	9
CP039343_756480_756534	66.0986	0.36071	0.271918	1.32654	0.184661	0.526819	38	70	63	48	89	52	63	111	72
EA665_000005|chromosomal_replication_initiator_protein_DnaA	997.931	0.121528	0.0916278	1.32632	0.184735	0.526819	912	1028	1031	859	1076	829	1039	1200	1119
EA665_010700|type_1_glutamine_amidotransferase_domain-containing_protein	142.208	-0.262744	0.198211	-1.32557	0.184981	0.526819	194	181	172	176	142	78	106	105	150
EA665_014960|restriction_endonuclease_subunit_S	299.739	0.161137	0.121566	1.32551	0.185001	0.526819	318	293	299	317	331	228	296	317	330
EA665_001800|50S_ribosomal_protein_L19	6029.73	0.103991	0.0784679	1.32527	0.185081	0.526819	5744	6238	6065	5691	6183	4736	7107	6799	6351
CP039343_898143_898221	45.7888	-0.375074	0.283117	-1.3248	0.185236	0.526819	64	55	51	27	53	33	36	57	45
EA665_009765|thiamine_pyrophosphate-dependent_dehydrogenase_E1_component_subunit_alpha	1065.12	-0.120293	0.0908079	-1.3247	0.185271	0.526819	1172	1060	1254	948	1019	783	1113	1210	1177
CP039343_3911514_3911890	50.8886	0.356543	0.269186	1.32452	0.18533	0.526819	32	50	55	57	52	41	62	49	64
EA665_016920|DUF2846_domain-containing_protein	55.17	-0.323904	0.244564	-1.32442	0.185365	0.526819	57	76	62	46	54	34	54	63	62
EA665_018950|DUF1624_domain-containing_protein	5.6596	-1.15471	0.872376	-1.32363	0.185625	NA	10	14	2	3	4	3	12	2	2
EA665_017285|Zn-dependent_hydrolase	126.549	-0.218975	0.165629	-1.32208	0.186142	0.528664	143	168	147	120	122	95	119	127	115
CP039343_4009204_4009537	48328.5	0.0973609	0.0738478	1.3184	0.18737	0.531142	48885	52858	49069	46072	50512	41133	50564	48583	51366
CP039343_689483_689610	68.6416	-0.289901	0.219912	-1.31826	0.187417	0.531142	70	82	91	58	62	50	65	74	77
EA665_010425|DHA2_family_efflux_MFS_transporter_permease_subunit	23.7344	0.501964	0.380834	1.31806	0.187483	0.531142	23	19	16	30	19	21	32	28	26
EA665_003165|DUF934_domain-containing_protein	209.311	0.185677	0.140887	1.31792	0.18753	0.531142	204	240	189	229	225	164	211	225	217
CP039343_482870_482977	4.81486	1.32938	1.01054	1.31552	0.188336	NA	3	4	0	4	6	5	13	8	0
CP039343_392953_393176	5.93456	-1.05739	0.804459	-1.31442	0.188706	NA	2	9	13	5	4	1	5	8	9
CP039343_879860_880066	250.022	-0.179834	0.1369	-1.31362	0.188975	0.534868	267	322	275	255	221	177	262	258	248
EA665_005305|YbdD/YjiX_family_protein	125.314	0.22408	0.170752	1.31231	0.189415	0.535192	132	125	115	123	138	111	119	151	123
CP039343_3869600_3869660	30.6796	0.429598	0.327399	1.31215	0.189468	0.535192	30	30	26	38	26	34	27	33	31
CP039343_1238969_1239055	9.92511	-0.774273	0.590163	-1.31196	0.189532	NA	9	16	16	4	6	10	6	13	11
EA665_003015|cob(I)yrinic_acid_a,c-diamide_adenosyltransferase	90.9921	0.262005	0.199775	1.3115	0.189689	0.535192	92	82	98	94	89	94	84	98	89
EA665_018140|threonine_synthase	2304.04	0.099882	0.0761602	1.31147	0.189698	0.535192	2205	2468	2303	2151	2335	1898	2499	2628	2483
EA665_016595|NAD(P)_transhydrogenase_subunit_alpha	71.7042	-0.329279	0.251099	-1.31135	0.189739	0.535192	90	84	95	89	47	47	63	57	83
CP039343_991587_991657	168.121	-0.20989	0.160155	-1.31054	0.190014	0.5356	177	223	172	141	146	134	175	203	165
EA665_007510|ABC_transporter_permease	8.53997	-0.849802	0.648676	-1.31006	0.190177	NA	9	7	15	6	7	2	9	10	15
EA665_004860|hypothetical_protein	107.883	-0.238403	0.182015	-1.3098	0.190264	0.535679	146	147	131	114	108	86	65	89	97
CP039343_549923_550115	23.2082	0.489273	0.37358	1.30969	0.190302	0.535679	23	18	24	27	21	29	18	24	23
CP039343_3990355_3990475	1.17128	2.49718	1.90683	1.3096	0.190332	NA	1	0	0	3	0	2	1	0	3
EA665_019010|beta-ketoacyl-ACP_synthase_I	8.19408	0.888599	0.678627	1.30941	0.190396	NA	10	1	8	6	18	7	10	7	7
EA665_006445|p-hydroxycinnamoyl_CoA_hydratase/lyase	6.40958	-0.965363	0.737258	-1.3094	0.1904	NA	5	8	15	5	2	5	5	9	5
EA665_007480|hypothetical_protein	39.3965	-0.395986	0.302485	-1.30911	0.190497	0.535862	60	45	52	33	43	27	20	47	35
CP039343_3385048_3385205	7.52247	0.894939	0.683643	1.30907	0.190509	NA	5	6	4	9	9	6	13	12	4
EA665_012205|ead/Ea22-like_family_protein	9.95102	-0.779998	0.596	-1.30872	0.190629	NA	10	16	10	5	8	5	7	18	14
CP039343_771919_771986	193.992	0.192967	0.147487	1.30837	0.190749	0.536204	193	202	182	186	214	165	225	187	206
CP039343_1772863_1772953	1.7837	-1.99263	1.52319	-1.30819	0.190808	NA	1	4	4	0	2	0	3	1	2
CP039343_1479377_1479530	4.90941	1.07852	0.824698	1.30778	0.190948	NA	1	4	5	7	6	5	5	3	8
CP039343_3467323_3467422	19.2192	-0.535712	0.409719	-1.30751	0.19104	0.536656	29	25	24	16	23	8	18	21	14
CP039343_2054779_2055192	3.08641	1.42313	1.08892	1.30691	0.191242	NA	2	2	2	3	2	8	2	0	5
EA665_008925|tRNA_(uridine(54)-C5)-methyltransferase_TrmA	275.295	-0.164499	0.125914	-1.30645	0.191401	0.537295	307	300	340	256	280	191	282	297	266
CP039343_2853236_2853440	2.61599	-1.49734	1.14637	-1.30616	0.191498	NA	2	9	5	2	3	0	0	2	2
CP039343_570300_570368	45.9612	-0.350196	0.268206	-1.3057	0.191655	0.537295	69	58	53	44	42	35	29	46	44
EA665_018575|LysM_peptidoglycan-binding_domain-containing_protein	24.9855	0.468121	0.358524	1.30569	0.191658	0.537295	26	25	20	32	34	19	29	19	22
CP039343_2754090_2754206	255.914	-0.167589	0.128493	-1.30426	0.192144	0.53829	284	279	302	246	237	178	251	274	291
CP039343_1480321_1480614	2.37129	-1.54096	1.18248	-1.30316	0.192519	NA	2	9	3	1	1	2	1	2	1
CP039343_2580639_2580716	7.83067	-0.93025	0.714103	-1.30268	0.192683	NA	9	8	13	3	10	1	6	7	17
EA665_019805|hypothetical_protein	314.9	0.170383	0.130971	1.30093	0.193284	0.54063	328	312	305	282	335	290	278	353	375
CP039343_1854335_1854440	3.38201	1.43417	1.10252	1.30081	0.193322	NA	1	4	1	0	4	9	2	5	3
CP039343_252209_252609	40.5433	-0.437332	0.336302	-1.30041	0.193459	0.54063	50	48	55	44	47	9	33	50	42
EA665_000650|transcription_antitermination_factor_NusB	673.248	0.136504	0.104975	1.30035	0.193482	0.54063	628	729	627	612	717	539	799	788	692
EA665_009045|nucleotidyltransferase_family_protein	285.599	0.173576	0.133491	1.30028	0.193504	0.54063	237	328	263	265	320	217	289	340	350
CP039343_610881_611125	653.951	0.164843	0.126916	1.29883	0.194001	0.541653	627	649	638	683	663	496	868	687	634
CP039343_2133758_2133949	3.24197	1.33794	1.03091	1.29782	0.194348	NA	2	4	0	3	6	4	3	5	2
EA665_010280|alpha/beta_fold_hydrolase	15.6757	0.65226	0.502771	1.29733	0.194518	0.542728	7	20	5	14	17	12	25	24	19
EA665_001830|EamA_family_transporter	167.604	-0.213227	0.164546	-1.29586	0.195025	0.543775	211	205	198	151	149	150	123	189	149
CP039343_2254960_2255031	4.71666	1.1244	0.868313	1.29493	0.195345	NA	1	4	4	4	9	4	3	4	10
EA665_018975|DUF1003_domain-containing_protein	6.06598	1.0554	0.815102	1.29481	0.195385	NA	2	2	6	6	8	4	13	3	11
EA665_000815|ion_channel_protein_Tsx	288.182	0.193452	0.14952	1.29382	0.195728	0.545147	277	283	273	287	307	224	389	320	259
EA665_015255|DNA_translocase_FtsK	2177.05	-0.10288	0.0795358	-1.2935	0.195837	0.545147	2267	2615	2472	1941	2181	1729	1974	2378	2319
EA665_013910|MFS_transporter	96.4552	-0.256823	0.198583	-1.29328	0.195914	0.545147	124	118	130	113	97	59	67	92	84
EA665_019170|Vi_polysaccharide_biosynthesis_UDP-N-acetylglucosamine_C-6_dehydrogenase_TviB	2271.82	-0.103456	0.0800434	-1.2925	0.196183	0.545344	2492	2571	2559	2278	2214	1607	2247	2356	2438
EA665_014415|hypothetical_protein	39.9935	-0.384183	0.297284	-1.29231	0.19625	0.545344	46	66	39	39	40	21	37	45	36
CP039343_4004810_4004943	12.0858	-0.699461	0.541348	-1.29207	0.196332	NA	13	13	14	4	9	8	14	22	15
CP039343_1975653_1975777	1.26565	-2.44901	1.89553	-1.29199	0.196359	NA	0	6	1	1	0	0	3	1	0
CP039343_3381191_3381359	104.145	-0.262667	0.203363	-1.29162	0.196489	0.545642	135	108	105	99	89	62	124	100	133
CP039343_178041_178278	54.0594	0.323657	0.250837	1.29031	0.196943	0.546132	56	54	46	62	69	38	60	58	49
EA665_009180|lysine_exporter_LysO_family_protein	100.975	-0.259169	0.200902	-1.29003	0.197041	0.546132	125	123	104	70	116	68	111	116	94
CP039343_3513512_3513634	118.607	-0.228091	0.17682	-1.28996	0.197063	0.546132	120	137	158	113	104	86	118	132	117
CP039343_2571498_2571686	2.57168	1.47689	1.14547	1.28934	0.197281	NA	1	2	2	7	3	2	0	2	4
EA665_019200|murein_biosynthesis_integral_membrane_protein_MurJ	196.258	0.182546	0.141703	1.28823	0.197665	0.54743	199	194	201	197	228	155	201	226	185
CP039343_4029501_4029636	4.04966	1.20984	0.939351	1.28796	0.197761	NA	1	3	3	8	4	2	3	6	7
EA665_004355|LysE_family_translocator	50.4279	-0.324976	0.252396	-1.28756	0.197898	0.547709	62	64	60	50	41	36	48	47	53
EA665_000170|efflux_RND_transporter_periplasmic_adaptor_subunit	7.82771	0.823585	0.63983	1.28719	0.198027	NA	5	8	5	13	6	8	8	8	9
EA665_017835|MerR_family_transcriptional_regulator	10.7977	-0.717663	0.557702	-1.28682	0.198157	NA	15	10	21	11	7	6	13	6	10
EA665_003545|long-chain_fatty_acid_transporter	2209.19	-0.126821	0.0985995	-1.28623	0.198364	0.548631	2414	2362	2664	2304	2039	1515	2074	2332	2503
EA665_013240|acyl-CoA_dehydrogenase	22.4944	-0.484167	0.376678	-1.28536	0.198666	0.548684	26	47	29	21	28	14	13	12	17
CP039343_3754570_3754695	150.26	-0.206021	0.160291	-1.28529	0.198691	0.548684	171	195	158	120	159	111	152	149	160
EA665_016410|hypothetical_protein	1073.7	0.127511	0.0992384	1.2849	0.198828	0.548684	1067	1044	1033	1013	1083	846	1342	1209	1133
CP039343_1396064_1396213	7.0868	0.876638	0.682329	1.28477	0.198871	NA	8	3	7	11	13	5	4	3	10
EA665_019565|hypothetical_protein	326.869	0.153863	0.119792	1.28442	0.198994	0.548684	305	354	361	363	348	262	292	342	346
CP039343_2946535_2947312	1.50452	-1.93448	1.50629	-1.28427	0.199047	NA	3	3	3	0	1	1	1	1	1
EA665_015060|transcriptional_regulator	23.6311	0.511016	0.397905	1.28426	0.19905	0.548684	18	39	13	26	33	26	23	19	15
EA665_010610|hypothetical_protein	8.37286	-0.861421	0.671174	-1.28345	0.199333	NA	9	15	10	1	9	6	4	13	11
EA665_009700|hypothetical_protein	353.074	-0.147303	0.114819	-1.28292	0.199521	0.549364	390	413	435	325	349	282	302	348	377
CP039343_636311_636477	1.38739	-2.26602	1.76631	-1.28291	0.199522	NA	4	0	2	1	0	0	2	1	3
EA665_016805|histidine--tRNA_ligase	1758.67	0.0999515	0.0779167	1.2828	0.199563	0.549364	1735	1780	1820	1648	1840	1410	1944	1910	1923
CP039343_366623_366830	6791.74	0.0950283	0.074158	1.28143	0.200042	0.549654	6806	7049	6646	6384	6932	5425	7737	7578	7271
EA665_019145|acyltransferase	330.8	0.163627	0.127759	1.28075	0.200281	0.549654	327	308	330	339	305	278	342	357	419
EA665_006605|aspartate_kinase	3046.98	0.104815	0.0818404	1.28072	0.200291	0.549654	2887	3206	3198	3153	3102	2317	3291	3166	3437
CP039343_1279202_1279282	76.8737	0.283213	0.221141	1.28069	0.200303	0.549654	69	87	69	93	70	70	65	93	80
CP039343_1488596_1488809	220.541	-0.196434	0.153432	-1.28027	0.20045	0.549654	228	247	265	201	175	173	190	285	253
CP039343_193045_193293	93.8124	-0.75168	0.587306	-1.27988	0.200588	0.549654	136	120	127	30	123	48	37	127	128
EA665_002755|TIGR01244_family_phosphatase	116.792	0.233591	0.182604	1.27922	0.200819	0.549654	109	106	136	136	135	85	104	121	132
CP039343_4013504_4013714	43.9791	-0.356226	0.278472	-1.27922	0.200821	0.549654	51	47	76	43	38	35	35	37	39
EA665_013770|30S_ribosomal_protein_S2	16922.2	0.100844	0.0788411	1.27908	0.200868	0.549654	17098	17226	16906	15955	17660	13467	19688	18403	17594
EA665_019715|hypothetical_protein	80.5602	0.291416	0.227901	1.2787	0.201003	0.549656	69	77	73	89	104	41	97	100	90
EA665_018210|DNA_modification_methylase	779.987	-0.133792	0.104686	-1.27803	0.20124	0.54994	831	960	878	631	848	607	701	906	772
EA665_003820|hypothetical_protein	68.2496	0.304949	0.238854	1.27672	0.201702	0.550838	67	58	64	64	70	65	61	68	101
CP039343_1277677_1277770	5.57184	-1.05378	0.825722	-1.27619	0.201889	NA	8	4	8	2	1	5	7	7	9
CP039343_2191058_2191135	1.76067	1.83962	1.44191	1.27582	0.202018	NA	0	1	2	4	2	3	3	0	0
CP039343_2018342_2018453	11.8894	0.687388	0.538828	1.27571	0.202058	NA	11	8	6	10	17	8	12	19	18
CP039343_2252238_2252497	2.34641	1.68295	1.31983	1.27513	0.202263	NA	2	1	1	1	11	0	1	1	4
EA665_000780|hypothetical_protein	26.0824	-0.460378	0.361104	-1.27492	0.202338	0.55221	26	35	42	21	31	13	26	19	28
EA665_019755|hypothetical_protein	13.597	0.613294	0.481105	1.27476	0.202393	NA	9	13	12	17	12	15	13	17	14
EA665_006800|Y-family_DNA_polymerase	10.6983	0.696067	0.546425	1.27386	0.202714	NA	10	8	11	17	11	12	12	10	4
EA665_004995|hypothetical_protein	8.50917	-0.880374	0.691204	-1.27368	0.202776	NA	18	14	4	2	10	5	7	14	5
CP039343_98074_98166	98.3397	-0.288136	0.226336	-1.27304	0.203003	0.553529	77	145	106	61	84	82	118	109	118
CP039343_1706439_1706721	27.3488	0.42566	0.334536	1.27239	0.203235	0.553529	28	30	23	37	36	21	21	26	26
EA665_010445|nicotinate_phosphoribosyltransferase	30.1118	0.446045	0.350557	1.27239	0.203235	0.553529	22	33	17	29	25	29	44	36	37
EA665_016925|ATP-dependent_Clp_protease_ATP-binding_subunit_ClpX	2299.62	-0.100175	0.0787512	-1.27204	0.203359	0.553529	2432	2720	2639	1978	2397	1842	2135	2509	2338
EA665_006390|glucarate_dehydratase	12.3326	0.630942	0.496523	1.27072	0.203828	NA	14	10	9	18	15	11	9	11	14
CP039343_409741_409964	2.38224	-1.60786	1.26615	-1.26989	0.204125	NA	2	4	5	0	1	2	3	1	4
CP039343_106862_107192	27.1558	-0.515298	0.405863	-1.26963	0.204215	0.554581	24	18	52	13	23	20	28	31	41
EA665_012560|helicase	375.782	-0.139154	0.109614	-1.26949	0.204266	0.554581	390	450	450	350	374	280	362	386	392
EA665_016815|helix-turn-helix_domain-containing_protein	1368.07	0.10142	0.0798915	1.26947	0.204274	0.554581	1317	1510	1398	1282	1464	1132	1363	1494	1493
CP039343_1426363_1426802	317.866	0.150485	0.118564	1.26923	0.204361	0.554581	314	322	330	311	323	281	317	331	355
CP039343_3673323_3673441	62.131	-0.298698	0.235401	-1.26889	0.20448	0.554581	74	66	72	42	62	44	70	76	64
EA665_018435|trimeric_intracellular_cation_channel_family_protein	76.7077	0.270553	0.213255	1.26869	0.204553	0.554581	63	84	78	91	83	59	83	76	80
EA665_010370|TetR/AcrR_family_transcriptional_regulator	5.48913	-0.963459	0.759693	-1.26822	0.204719	NA	9	10	6	4	4	3	2	7	6
CP039343_3321176_3321325	11.5749	-0.700293	0.552742	-1.26694	0.205175	NA	19	17	10	10	13	2	14	11	12
CP039343_1319534_1319593	21.397	0.501728	0.396512	1.26535	0.205745	0.557445	26	17	16	26	27	19	22	27	13
CP039343_1911577_1911686	1.08998	-2.25777	1.78522	-1.2647	0.205979	NA	3	1	2	0	0	1	1	1	1
CP039343_2066687_2066788	5.97249	-1.18986	0.94089	-1.26462	0.206009	NA	7	2	12	8	0	0	7	6	14
EA665_012245|PepSY_domain-containing_protein	32.1535	0.410199	0.324425	1.26439	0.206091	0.557461	23	30	34	39	40	21	39	30	37
CP039343_1603045_1603530	4.44014	-1.09943	0.869649	-1.26423	0.206149	NA	8	6	6	1	4	3	4	2	7
EA665_007830|catalase_family_peroxidase	30.4265	-0.41552	0.328693	-1.26416	0.206174	0.557461	46	34	42	23	35	21	22	22	34
EA665_012835|peptide_chain_release_factor_1	433.318	0.134596	0.106512	1.26367	0.206348	0.557461	419	449	396	415	437	337	459	514	525
EA665_018010|heme_biosynthesis_protein_HemY	98.0052	-0.251243	0.198822	-1.26366	0.206354	0.557461	109	122	100	96	77	65	118	100	110
EA665_017795|excinuclease_ABC_subunit_UvrC	143.255	0.209892	0.166176	1.26307	0.206563	0.557461	146	142	140	137	173	116	152	171	126
EA665_019450|hypothetical_protein	266.506	0.161574	0.12795	1.26279	0.206664	0.557461	245	292	257	285	269	207	283	291	297
CP039343_2579375_2579567	1.48819	2.0668	1.63703	1.26253	0.206759	NA	0	2	0	1	3	3	0	1	3
CP039343_2904022_2904083	66.8223	-0.291908	0.231272	-1.26219	0.206881	0.557461	83	76	78	62	58	46	51	75	84
EA665_019090|phosphomannomutase/phosphoglucomutase	677.724	-0.135875	0.107669	-1.26197	0.20696	0.557461	706	732	824	656	704	421	691	762	723
EA665_012715|bifunctional_aconitate_hydratase_2/2-methylisocitrate_dehydratase	6176.28	0.0809525	0.0641621	1.26169	0.207061	0.557461	6103	6176	6236	5738	6434	4652	6708	7349	6977
EA665_018225|ammonium_transporter	238.878	0.167184	0.132531	1.26148	0.207137	0.557461	221	257	237	213	268	206	237	282	252
CP039343_553339_553390	8.09158	0.998306	0.791465	1.26134	0.207187	NA	13	2	1	15	13	1	13	8	8
CP039343_3863897_3864392	89.2979	0.279318	0.221509	1.26098	0.207316	0.557461	81	75	90	103	102	54	124	97	89
CP039343_2224130_2224317	99.8207	0.282996	0.224454	1.26082	0.207374	0.557461	81	102	82	103	124	54	92	161	121
EA665_000145|sulfite_exporter_TauE/SafE_family_protein	15.4137	0.594357	0.47182	1.25971	0.207773	0.558013	15	11	11	18	17	13	10	19	26
CP039343_593021_593188	109.895	-0.251035	0.199313	-1.2595	0.20785	0.558013	136	99	154	112	96	73	114	113	108
CP039343_1624921_1625362	3.27546	1.2309	0.977819	1.25883	0.208093	NA	1	4	2	5	5	4	4	3	1
EA665_019000|type_VI_secretion_system_tip_protein_VgrG	2006.5	-0.113474	0.0903277	-1.25625	0.209027	0.560196	2293	2231	2327	2064	1949	1432	2063	1961	1993
EA665_019310|TetR_family_transcriptional_regulator	162.496	0.204737	0.163006	1.25601	0.209111	0.560196	171	147	159	192	168	114	175	186	168
EA665_003885|lipoyl(octanoyl)_transferase_LipB	170.142	-0.184081	0.146561	-1.256	0.209114	0.560196	198	206	205	150	186	125	155	177	154
EA665_003645|SPFH/Band_7/PHB_domain_protein	177.011	-0.192022	0.152924	-1.25567	0.209236	0.560196	207	205	206	163	189	115	154	176	209
EA665_012600|glutamine_amidotransferase	62.2972	-0.308406	0.245669	-1.25537	0.209343	0.560196	82	57	71	52	55	39	82	70	63
EA665_017845|DsbA_family_oxidoreductase	296.507	-0.155331	0.123889	-1.25378	0.209921	0.561044	338	346	336	260	321	208	292	337	277
EA665_004140|glycerol-3-phosphate_dehydrogenase	113.515	-0.230881	0.184152	-1.25375	0.209932	0.561044	137	114	153	104	106	85	94	129	116
CP039343_2079183_2079632	11.6512	-0.73207	0.58417	-1.25318	0.21014	NA	21	8	19	10	9	6	5	22	8
EA665_008045|PaaI_family_thioesterase	5.73736	0.979479	0.781998	1.25253	0.210376	NA	2	4	5	4	5	9	5	9	8
EA665_006120|ubiquinone_biosynthesis_protein_UbiH	390.379	-0.140603	0.112334	-1.25165	0.210696	0.56272	439	461	421	348	363	312	360	441	418
EA665_012815|acyl-CoA_dehydrogenase	250.538	0.163537	0.1307	1.25124	0.210848	0.562763	227	245	265	258	240	207	263	293	280
CP039343_1463235_1463518	2.82527	1.35432	1.08247	1.25114	0.210882	NA	1	3	2	5	4	4	0	5	1
CP039343_2863295_2863398	24.4837	-0.510259	0.408067	-1.25043	0.211142	0.563182	47	28	27	11	26	24	15	30	15
EA665_012380|MgtC/SapB_family_protein	15.5334	0.568193	0.4549	1.24905	0.211647	0.563975	15	12	11	17	22	10	15	21	19
CP039343_1468278_1468871	62.0178	-0.332241	0.266101	-1.24855	0.21183	0.563975	78	91	74	55	38	68	49	62	45
CP039343_1390616_1390670	11.7934	0.689981	0.552683	1.24842	0.211878	NA	7	13	7	18	15	5	15	10	18
EA665_004930|hypothetical_protein	83.1581	-0.290471	0.232746	-1.24802	0.212024	0.563975	93	93	110	56	91	61	55	110	96
EA665_002250|30S_ribosomal_protein_S3	23483.6	0.12165	0.0974825	1.24791	0.212063	0.563975	23146	21680	24575	23284	22221	18948	29077	25540	24924
EA665_015265|leucyl/phenylalanyl-tRNA--protein_transferase	78.9466	-0.271653	0.217715	-1.24775	0.212124	0.563975	86	83	101	63	75	54	65	107	92
CP039343_3043676_3043924	1.14396	2.58953	2.07769	1.24635	0.212636	NA	0	0	0	1	2	0	0	7	1
EA665_010160|hypothetical_protein	44.3939	0.377698	0.303134	1.24598	0.212773	0.565337	31	44	57	64	47	36	25	51	48
EA665_015510|3,4-dihydroxy-2-butanone-4-phosphate_synthase	790.738	-0.119077	0.0956596	-1.2448	0.213205	0.565867	801	860	932	661	833	560	797	934	868
EA665_013505|hypothetical_protein	149.044	-0.194581	0.156333	-1.24466	0.213255	0.565867	188	174	169	141	145	112	145	150	136
EA665_009020|hypothetical_protein	169.57	0.193741	0.155701	1.24431	0.213384	0.565867	173	171	144	146	187	145	194	189	192
EA665_003725|phosphatase_PAP2_family_protein	5.22024	-1.04122	0.837024	-1.24396	0.213515	NA	10	3	10	4	6	0	6	4	6
EA665_012080|hypothetical_protein	21.6852	0.523797	0.421193	1.2436	0.213646	0.566197	15	31	11	18	36	17	22	28	20
CP039343_1032730_1032833	6.87939	-0.875677	0.704277	-1.24337	0.213732	NA	15	8	5	4	4	5	8	8	6
CP039343_1372457_1372521	1.30513	-2.45421	1.9748	-1.24276	0.213955	NA	1	6	0	0	0	1	4	0	0
EA665_015010|hypothetical_protein	33.0957	-0.411712	0.331485	-1.24202	0.214227	0.567079	47	38	28	24	21	27	40	39	38
CP039343_342240_342310	332.212	-0.150643	0.121295	-1.24195	0.214254	0.567079	344	393	382	272	336	255	326	403	328
CP039343_2260229_2260438	9.46434	0.773792	0.623364	1.24132	0.214489	NA	11	6	2	9	11	8	9	14	16
CP039343_2550910_2551040	2.82473	1.35139	1.08878	1.2412	0.214532	NA	3	1	1	4	4	3	5	2	2
CP039343_3615760_3615844	7.07481	-0.898149	0.723704	-1.24104	0.214589	NA	7	11	11	4	3	6	8	13	2
CP039343_3419724_3419791	4.57431	-1.15639	0.932024	-1.24073	0.214707	NA	6	2	10	4	2	1	2	7	9
EA665_004190|multidrug_efflux_RND_transporter_permease_subunit	137.1	-0.207628	0.167408	-1.24025	0.214882	0.567287	137	166	153	117	137	86	146	145	173
EA665_002265|30S_ribosomal_protein_S17	19463.2	0.132281	0.106677	1.24002	0.214969	0.567287	19129	17017	20251	19776	17457	15490	24594	21071	22078
EA665_004615|deoxyguanosinetriphosphate_triphosphohydrolase	218.526	-0.190248	0.153445	-1.23985	0.215033	0.567287	245	269	258	171	253	159	185	269	195
EA665_003880|hypothetical_protein	679.926	0.187778	0.151471	1.23969	0.215089	0.567287	701	669	652	913	660	423	658	712	817
CP039343_3322117_3322349	18.1377	0.513182	0.414009	1.23954	0.215145	0.567287	23	19	14	32	22	15	11	13	14
CP039343_3705977_3706296	16141.5	0.0969492	0.0782161	1.2395	0.215159	0.567287	15925	16157	15863	15940	16225	11898	19204	18003	17961
CP039343_2912113_2912181	4.48233	1.0692	0.862956	1.239	0.215346	NA	2	2	5	4	6	6	3	4	8
EA665_008285|SDR_family_oxidoreductase	3.18198	1.24788	1.00728	1.23886	0.215398	NA	2	2	2	3	4	5	3	2	5
CP039343_1370285_1370347	7.81567	0.922315	0.744656	1.23858	0.215501	NA	4	3	3	4	5	7	17	12	16
EA665_006900|hypothetical_protein	3.34106	-1.33743	1.07982	-1.23856	0.215508	NA	3	3	6	1	1	2	5	4	6
EA665_002585|DUF4256_domain-containing_protein	367.174	0.205156	0.165683	1.23824	0.215626	0.568155	343	398	331	246	416	383	344	446	420
EA665_003245|DNA-3-methyladenine_glycosylase	25.2942	0.44752	0.361569	1.23772	0.215822	0.568307	15	25	23	25	31	18	32	33	29
EA665_011350|quinoprotein_glucose_dehydrogenase	442.362	0.153332	0.123988	1.23666	0.216212	0.568972	448	462	480	551	442	335	414	465	424
CP039343_3408478_3408650	6.18756	-0.893573	0.722807	-1.23625	0.216365	NA	11	8	7	3	5	4	6	4	9
EA665_019105|UDP-glucose/GDP-mannose_dehydrogenase_family_protein	1006.96	-0.105325	0.0852927	-1.23486	0.216882	0.570371	1061	1140	1140	849	1051	764	1017	1112	1070
CP039343_3432911_3433114	66.2956	0.293573	0.237991	1.23355	0.217371	0.57067	45	71	66	59	83	50	79	69	83
CP039343_100806_100880	59.9482	0.317833	0.257672	1.23348	0.217397	0.57067	69	42	53	56	70	50	81	64	58
EA665_016680|TetR/AcrR_family_transcriptional_regulator	13.9043	-0.597954	0.484919	-1.2331	0.217539	0.57067	12	26	18	12	14	6	15	13	13
CP039343_641444_641825	4735.99	0.0836651	0.0678859	1.23244	0.217786	0.57067	4825	5051	4717	4497	4961	3791	4978	5129	5175
CP039343_2860546_2860829	16.4226	-0.593411	0.481748	-1.23179	0.218028	0.57067	22	18	29	21	8	10	6	19	18
EA665_018415|hypothetical_protein	47.1304	0.335084	0.272053	1.23169	0.218066	0.57067	38	52	37	48	43	45	45	60	59
EA665_007030|copper-translocating_P-type_ATPase	60.466	-0.314246	0.255137	-1.23167	0.218071	0.57067	88	60	70	42	71	39	50	63	73
EA665_015055|DNA-binding_protein	24.051	0.461012	0.374323	1.23159	0.218104	0.57067	16	40	21	28	39	24	14	17	18
CP039343_2750758_2750878	3.48204	1.29293	1.0505	1.23077	0.21841	NA	1	3	2	2	3	7	8	2	2
EA665_002050|hypothetical_protein	235.098	-0.171459	0.139368	-1.23027	0.218597	0.571598	276	291	247	240	220	161	239	257	219
EA665_003720|two-component_system_sensor_histidine_kinase_PmrB	61.4284	-0.296365	0.241007	-1.22969	0.218813	0.571799	76	71	73	54	52	47	47	62	80
CP039343_4026565_4026806	38.4851	0.350055	0.284793	1.22916	0.219012	0.571958	39	41	35	49	45	32	39	36	32
CP039343_58753_58947	2.52303	-1.57215	1.27926	-1.22896	0.219088	NA	3	2	5	0	3	0	4	4	3
CP039343_2545227_2545299	35.5615	-0.371509	0.302839	-1.22675	0.219915	0.57369	32	49	46	28	32	24	36	38	42
CP039343_2155411_2155608	37.8579	0.370386	0.302043	1.22627	0.220098	0.57369	29	36	32	31	48	29	52	40	48
CP039343_3386717_3386775	50.464	-0.338529	0.276077	-1.22621	0.22012	0.57369	56	80	43	41	38	41	55	57	50
CP039343_2141417_2141676	18.9935	0.535832	0.437089	1.22591	0.220233	0.57369	17	8	21	16	22	19	28	21	19
CP039343_563565_563616	464.123	-0.145234	0.118513	-1.22547	0.220398	0.573758	520	570	482	396	489	337	528	477	443
EA665_006655|hypothetical_protein	10.7425	0.654262	0.534146	1.22488	0.220622	NA	8	8	14	16	17	8	11	8	7
EA665_000295|hypothetical_protein	22.8204	-0.457198	0.373346	-1.2246	0.220727	0.574168	38	30	23	16	24	17	18	22	21
CP039343_1690604_1690674	106.006	-0.252917	0.206578	-1.22431	0.220834	0.574168	160	99	109	84	100	81	102	112	121
EA665_015525|peptidoglycan-binding_protein_LysM	2007.16	0.125121	0.102249	1.22368	0.221071	0.574423	1924	2183	2061	1834	2196	1718	1664	2402	2299
CP039343_3001275_3001576	4.94777	1.0662	0.87171	1.22312	0.221285	NA	4	3	2	1	8	7	9	5	5
EA665_009085|3-deoxy-manno-octulosonate_cytidylyltransferase	234.74	-0.161582	0.13216	-1.22263	0.221469	0.575095	244	287	270	227	221	166	218	260	256
EA665_012145|hypothetical_protein	11.1385	-0.707587	0.57933	-1.22139	0.221939	NA	17	16	9	10	6	6	7	10	22
CP039343_867868_867926	571.263	0.142183	0.11646	1.22087	0.222134	0.576384	554	641	582	683	573	428	520	599	621
EA665_017625|monovalent_cation/H+_antiporter_subunit_A	1137.96	-0.108913	0.0892304	-1.22058	0.222246	0.576384	1256	1325	1318	1143	1131	831	1150	1173	1060
CP039343_1420317_1420500	164.159	-0.204324	0.167491	-1.21991	0.2225	0.576403	164	202	200	120	153	144	168	156	189
CP039343_1483930_1484079	34.1426	-0.383413	0.314411	-1.21946	0.222669	0.576403	34	49	45	31	37	17	39	32	31
CP039343_707975_708088	85.9778	0.251196	0.205991	1.21945	0.222673	0.576403	71	80	84	90	80	69	111	94	102
CP039343_546368_546577	29.8988	0.407021	0.333942	1.21884	0.222906	0.576527	29	30	25	27	49	21	30	31	31
EA665_014985|hypothetical_protein	137.77	0.209369	0.171828	1.21848	0.223042	0.576527	135	124	152	127	181	103	133	145	157
EA665_017205|AraC_family_transcriptional_regulator	340.617	-0.153531	0.126045	-1.21807	0.223198	0.576527	391	361	388	352	303	226	361	368	366
EA665_005195|DUF2238_domain-containing_protein	12.4021	-0.618476	0.507851	-1.21783	0.223288	NA	21	18	12	10	14	5	10	11	14
CP039343_928804_929051	77.2961	-0.272555	0.223853	-1.21756	0.22339	0.576527	76	96	106	51	91	56	72	88	74
CP039343_701396_701585	19.6798	0.495611	0.407078	1.21748	0.22342	0.576527	24	15	14	27	19	18	20	21	19
CP039343_3989812_3990034	8.16745	-0.792912	0.65172	-1.21665	0.223739	NA	18	10	9	5	12	2	8	4	8
EA665_003810|recombinase	444.856	-0.153264	0.126072	-1.21569	0.224104	0.577931	509	528	486	333	467	370	423	530	415
EA665_008115|SGNH/GDSL_hydrolase_family_protein	10.5797	0.684783	0.563645	1.21492	0.224397	NA	7	11	6	16	9	8	10	13	16
EA665_003865|flavodoxin_family_protein	49.0167	-0.31711	0.261222	-1.21395	0.224768	0.577989	49	60	64	42	37	39	48	52	57
CP039343_1270147_1270214	144.261	0.224138	0.184675	1.21368	0.224868	0.577989	129	164	145	153	151	132	96	175	165
EA665_002330|30S_ribosomal_protein_S13	11691.4	0.106545	0.0877952	1.21356	0.224914	0.577989	10913	11703	12671	11198	11720	9524	13829	12635	12122
EA665_007370|serine_hydrolase	31.4441	-0.39646	0.326707	-1.2135	0.224937	0.577989	42	47	32	34	26	19	22	32	35
CP039343_3524936_3525048	422.507	-0.142198	0.117182	-1.21348	0.224947	0.577989	455	529	455	404	413	302	358	477	476
EA665_010775|muconolactone_Delta-isomerase	25.5917	0.473325	0.390356	1.21255	0.225304	0.577989	25	13	27	23	40	16	29	23	38
EA665_008680|methionine_transporter	8.05581	-0.789813	0.651434	-1.21242	0.225351	NA	12	17	5	5	8	4	5	11	8
EA665_004165|co-chaperone_GroES	750.815	0.128979	0.106389	1.21233	0.225385	0.577989	708	844	766	858	752	565	718	799	829
EA665_017530|DNA-binding_protein	264.044	-0.159578	0.13163	-1.21232	0.225388	0.577989	316	339	327	297	263	195	209	253	209
EA665_008840|tRNA_epoxyqueuosine(34)_reductase_QueG	73.565	-0.268727	0.221683	-1.21221	0.225432	0.577989	83	91	82	48	77	57	84	74	77
EA665_003125|hypothetical_protein	49.2674	0.311475	0.257127	1.21137	0.225755	0.577989	46	50	50	57	60	39	49	40	56
EA665_009790|2,3-butanediol_dehydrogenase	264.09	-0.156794	0.129447	-1.21126	0.225796	0.577989	286	282	306	252	235	185	274	322	275
EA665_016490|ribosome-associated_protein	392.958	-0.140436	0.115966	-1.21102	0.225889	0.577989	389	461	444	324	420	267	430	454	415
EA665_017885|DUF4442_domain-containing_protein	21.1407	-0.498134	0.411441	-1.21071	0.226008	0.577989	17	33	32	13	24	13	13	25	26
EA665_003325|response_regulator	34.9605	0.39091	0.322935	1.21049	0.226091	0.577989	22	29	47	44	37	29	32	34	43
CP039343_391106_391519	1.69246	-1.96965	1.62781	-1.21	0.226279	NA	0	5	4	1	1	0	4	1	0
EA665_016630|LysR_family_transcriptional_regulator	96.4821	-0.229582	0.189818	-1.20949	0.226477	0.578617	100	116	133	94	91	70	92	94	92
CP039343_2330373_2330610	4.44787	1.07762	0.891113	1.2093	0.226549	NA	3	2	3	6	8	1	7	6	5
EA665_013810|4-carboxymuconolactone_decarboxylase	34.035	0.370248	0.306409	1.20835	0.226913	0.579112	36	30	37	31	53	31	30	28	32
EA665_002970|acyl-CoA_dehydrogenase	543.863	-0.174203	0.144178	-1.20825	0.226951	0.579112	645	573	663	637	475	328	494	550	617
EA665_010855|nuclear_transport_factor_2_family_protein	4.24736	1.14316	0.946132	1.20824	0.226954	NA	1	3	3	1	6	6	7	7	4
EA665_001445|acetyl-CoA_hydrolase/transferase_family_protein	5161.45	-0.0959572	0.0794531	-1.20772	0.227155	0.579272	5403	5617	6024	5009	4994	3691	4842	5755	5878
EA665_006320|APC_family_permease	21.6417	-0.479934	0.397614	-1.20704	0.227418	0.579587	26	22	26	11	16	18	26	23	30
EA665_007865|LLM_class_flavin-dependent_oxidoreductase	11.1145	0.702681	0.582227	1.20689	0.227476	NA	8	4	12	15	13	6	21	12	10
EA665_003535|phosphoadenylyl-sulfate_reductase	350.904	0.148936	0.123657	1.20442	0.228426	0.581794	316	355	356	366	382	235	353	411	437
EA665_004610|Holliday_junction_branch_migration_protein_RuvA	298.02	-0.155214	0.128996	-1.20325	0.228881	0.582366	320	365	333	238	285	255	301	295	323
EA665_013120|HD_domain-containing_protein	31.2593	0.391355	0.325286	1.20311	0.228933	0.582366	27	30	29	40	40	18	31	38	33
CP039343_2717129_2717363	1.71954	-1.6643	1.38359	-1.20288	0.229021	NA	3	2	6	0	2	1	1	0	1
CP039343_1402954_1403014	8.60195	0.820748	0.682514	1.20254	0.229155	NA	2	8	9	14	10	5	13	3	14
EA665_005970|hypothetical_protein	6.09867	0.900815	0.749328	1.20216	0.2293	NA	6	3	4	8	8	5	6	3	12
EA665_018855|acyl-CoA_dehydrogenase	2.13366	1.64442	1.36816	1.20193	0.229393	NA	1	2	0	4	2	2	4	4	0
EA665_000785|hypothetical_protein	51.5716	-0.300567	0.250078	-1.2019	0.229404	0.583204	60	70	64	37	57	41	42	51	50
EA665_010305|citrate_transporter	13.0469	0.598243	0.497853	1.20165	0.2295	NA	14	10	11	11	17	17	16	12	8
CP039343_218929_219304	56.5706	-0.296949	0.247384	-1.20036	0.230001	0.584362	77	61	78	42	57	51	41	52	56
EA665_014435|HlyC/CorC_family_transporter	189.91	-0.174914	0.145765	-1.19998	0.230148	0.584375	216	236	194	173	195	125	198	211	193
EA665_007860|flavin_reductase	6.20201	-0.856377	0.713797	-1.19975	0.230237	NA	7	11	9	4	7	2	6	8	4
CP039344_7386_7453	26.8113	0.408109	0.340267	1.19938	0.23038	0.584604	26	30	21	30	29	28	27	27	23
EA665_014300|outer_membrane_protein_assembly_factor_BamE	9.32766	0.719689	0.600398	1.19869	0.230649	NA	10	7	4	10	13	7	7	12	15
EA665_001960|succinylglutamate_desuccinylase	277.044	0.154402	0.128893	1.19791	0.230951	0.585693	226	262	263	224	288	205	359	361	345
CP039343_638599_638679	7.864	-0.795719	0.664437	-1.19758	0.231079	NA	13	6	11	3	8	4	7	8	13
EA665_003190|OmpA_family_protein	37584.1	0.0739929	0.061836	1.1966	0.231463	0.586449	37223	40799	39366	35402	39575	30724	38152	41099	39824
EA665_009500|nicotinate-nucleotide--dimethylbenzimidazole_phosphoribosyltransferase	104.498	-0.233468	0.195158	-1.19631	0.231578	0.586449	119	108	145	80	102	88	85	111	116
EA665_013195|alpha/beta_fold_hydrolase	14.7941	-0.543469	0.454386	-1.19605	0.231677	0.586449	19	18	23	9	13	13	14	13	13
CP039343_2750357_2750488	10.0307	-0.685172	0.573061	-1.19564	0.231839	NA	13	10	16	6	10	5	11	15	7
EA665_007145|hypothetical_protein	11.0302	-0.645044	0.539639	-1.19533	0.231959	NA	15	20	14	11	10	6	6	15	5
EA665_008810|fimbrial_biogenesis_outer_membrane_usher_protein	14.3871	0.583146	0.487875	1.19528	0.231978	0.586852	11	9	15	11	20	14	17	11	22
CP039343_3998480_3998560	4.50598	1.06894	0.894442	1.19509	0.23205	NA	2	4	2	5	3	6	6	3	9
CP039343_505239_505356	7.37539	0.846369	0.708993	1.19376	0.232571	NA	13	2	4	15	10	5	6	3	8
CP039343_2565618_2566039	5.12858	-0.965791	0.809094	-1.19367	0.232607	NA	10	5	8	6	1	3	5	6	3
CP039343_2852199_2852408	8311.85	0.0990886	0.0830199	1.19355	0.232653	0.588199	8577	8642	8304	8560	8610	6324	9377	8840	8433
CP039343_2442553_2442694	4.91994	1.08097	0.905938	1.1932	0.232789	NA	1	1	6	4	3	7	5	11	6
EA665_003010|glycerophosphodiester_phosphodiesterase	62.0365	-0.283355	0.237656	-1.19229	0.233148	0.588775	59	75	88	48	61	47	61	58	71
EA665_016535|SDR_family_oxidoreductase	18.3871	-0.502127	0.421163	-1.19224	0.233167	0.588775	27	21	21	17	15	10	23	21	14
EA665_019265|YciK_family_oxidoreductase	280.403	-0.157396	0.132112	-1.19138	0.233503	0.589263	311	312	355	293	247	210	273	271	285
EA665_008900|OsmC_family_peroxiredoxin	61.3847	-0.315733	0.266003	-1.18695	0.235246	0.592645	75	55	86	55	65	31	71	49	78
EA665_009090|DNA_polymerase_III_subunit_delta'	162.598	-0.196104	0.165226	-1.18688	0.235274	0.592645	171	202	179	155	158	102	200	166	157
EA665_002485|hypothetical_protein	108.379	-0.216243	0.182243	-1.18656	0.235401	0.592645	135	118	141	96	124	73	97	110	99
EA665_008790|LysR_family_transcriptional_regulator	11.3241	-0.649849	0.547703	-1.1865	0.235426	NA	18	11	18	8	12	6	6	18	8
EA665_004070|23S_rRNA_(uridine(2552)-2'-O)-methyltransferase_RlmE	3185.24	-0.094565	0.0797036	-1.18646	0.235441	0.592645	3518	3741	3628	2715	3312	2675	3033	3270	3121
EA665_006670|XRE_family_transcriptional_regulator	10.5371	0.678563	0.572031	1.18624	0.235529	NA	6	13	6	10	19	6	9	14	14
CP039343_1875311_1875429	51.1099	-0.336182	0.283489	-1.18588	0.235671	0.592645	78	63	46	61	40	27	50	53	51
EA665_006920|DUF2520_domain-containing_protein	55.1291	-0.292656	0.246853	-1.18555	0.235802	0.592645	71	60	60	43	53	38	50	63	68
EA665_009100|YchF/TatD_family_DNA_exonuclease	314.499	-0.141848	0.119703	-1.185	0.236019	0.592645	344	338	351	278	293	231	320	338	383
EA665_002920|hypothetical_protein	147.422	-0.193439	0.163265	-1.18481	0.236092	0.592645	154	179	163	124	156	94	172	159	152
EA665_015440|glutamyl-tRNA_reductase	422.913	-0.126944	0.107196	-1.18423	0.236323	0.592645	460	502	453	387	424	302	451	444	444
[truncated: 3,813 more rows]
