# Supplementary material for: Bacterial Genome Wide Association Studies (bGWAS) and Transcriptomics Identifies Cryptic Antimicrobial Resistance Mechanisms in Acinetobacter baumannii
Source: Front Public Health. 2020 Sep 2;8:451. doi: 10.3389/fpubh.2020.00451 (PMC7493718; doi:10.3389/fpubh.2020.00451)
Supplement: Table S9 — DESeq2 results of Pair 3 RNA-Seq datasets. Biological replicates denoted with (a,b,c). Isolates grown in sub-inhibitory concentrations are labeled as “sub” with the corresponding antimicrobial. [file Table_9.xlsx]

## Sheet: pair_3_salmon 9.42.24 AM
Table S9: DESeq2 results of Pair 3 RNA-Seq datasets. Biological replicates denoted with (a,b,c). Isolates grown in sub-inhibitory concentrations are labeled as "sub" with the corresponding antimicrobial.
	baseMean	log2FoldChange	lfcSE	stat	pvalue	padj	TG29392a	TG29392b	TG29392c	TG29392-subCXMa	TG29392-subCXMb	TG29392-subCXMc	TG29392-subCROa	TG29392-subCROb	TG29392-subCROc	TG31307-subCXMa	TG31307-subCXMb	TG31307c
EA667_008585|recombinase_RecA	5911.5	-1.64502	0.0694682	-23.6801	5.78e-124	3.16e-120	4121	3178	4706	3689	3804	4026	4125	3679	3753	10900	11097	12521
EA667_000515|IS66_family_insertion_sequence_hypothetical_protein	522.12	-2.28053	0.0990687	-23.0197	2.96e-117	8.09e-114	295	201	346	253	282	243	279	222	234	1181	1180	1366
TG31307_2_1204807_1205112	654.442	-2.14959	0.0956138	-22.482	6.23e-112	1.14e-108	374	283	406	394	410	372	395	337	348	1412	1502	1405
EA667_018685|L-lactate_permease	189.417	-4.02189	0.187952	-21.3985	1.38e-101	1.89e-98	44	18	58	44	57	45	48	52	40	505	590	663
EA667_010085|LysR_family_transcriptional_regulator	524.397	-2.20183	0.104776	-21.0148	4.81e-98	5.26e-95	286	195	372	248	285	266	335	292	294	1096	1117	1351
EA667_008815|cytochrome_d_ubiquinol_oxidase_subunit_II	2212	-1.67456	0.0819157	-20.4425	7.01e-93	6.39e-90	1559	909	1480	1881	1970	1759	2012	1600	1705	3774	3721	3950
EA667_008975|CTP_synthase	5486.4	-1.37311	0.0722632	-19.0015	1.66e-80	1.3e-77	4454	2837	4373	4432	4834	4592	4493	3816	3891	9296	9254	8964
EA667_009350|potassium_transporter	532.134	-1.968	0.109033	-18.0496	7.95e-73	5.43e-70	305	259	351	353	354	335	368	283	331	1110	1132	1049
EA667_009335|hydrolase	897.9	-1.90214	0.10707	-17.7655	1.31e-70	7.95e-68	600	415	631	522	485	602	550	513	578	1759	1690	2193
TG31307_2_3610338_3610603	107.138	-3.78576	0.214415	-17.6562	9.12e-70	4.99e-67	32	19	29	22	19	21	23	21	23	316	323	369
EA667_008540|RIP_metalloprotease_RseP	1373.6	-1.33487	0.075766	-17.6184	1.78e-69	8.85e-67	1000	710	1117	1173	1190	1134	1371	1129	1059	2025	2191	2299
EA667_008515|UMP_kinase	2671.72	-1.56931	0.0901508	-17.4076	7.23e-68	3.29e-65	1974	1339	1911	2034	2307	2255	2118	1639	1874	4714	4968	4505
EA667_008820|cytochrome_bd-I_ubiquinol_oxidase_subunit_CydA	2531.84	-1.59387	0.0919213	-17.3395	2.37e-67	9.96e-65	1823	1021	1817	2209	2254	2161	2495	1906	1835	3999	3864	4879
EA667_009330|antibiotic_biosynthesis_monooxygenase	478.9	-1.99512	0.115215	-17.3165	3.53e-67	1.38e-64	297	247	288	293	280	309	277	254	271	981	931	1168
EA667_008525|di-trans,poly-cis-decaprenylcistransferase	1115.18	-1.5071	0.0879624	-17.1334	8.36e-66	3.05e-63	816	493	846	946	1015	881	1059	895	795	1886	1832	1833
EA667_008520|ribosome_recycling_factor	1604.64	-1.4703	0.08607	-17.0826	2e-65	6.83e-63	1234	809	1130	1349	1517	1322	1361	1171	1130	2785	2629	2637
EA667_008510|30S_ribosomal_protein_S12_methylthiotransferase_RimO	2335.43	-1.52873	0.08982	-17.0199	5.85e-65	1.88e-62	1677	1235	1839	1695	2050	1776	1747	1424	1640	4164	4378	3999
EA667_008590|RNA-binding_protein	1441.75	-1.69639	0.0997355	-17.0088	7.06e-65	2.15e-62	953	677	1270	852	840	917	1068	966	950	2483	2650	3404
EA667_008545|outer_membrane_protein_assembly_factor_BamA	4116.74	-1.22346	0.0724324	-16.891	5.24e-64	1.51e-61	3269	2402	3422	3426	3665	3486	3758	3032	3080	6574	6521	6392
EA667_008700|PTS_fructose_transporter_subunit_IIBC	600.453	-1.62931	0.098164	-16.5978	7.23e-62	1.98e-59	405	271	459	465	502	505	528	394	410	1072	1080	1038
EA667_012800|IS5_family_transposase	136.447	-3.01765	0.182573	-16.5285	2.29e-61	5.96e-59	55	31	69	41	53	39	58	53	37	327	391	419
TG31307_3_248596_248741	905.6	-1.52649	0.092651	-16.4757	5.48e-61	1.36e-58	628	497	796	616	579	606	650	661	595	1561	1601	1907
EA667_008710|phosphoenolpyruvate--protein_phosphotransferase	1319.79	-1.38229	0.0857405	-16.1218	1.79e-58	4.26e-56	1044	724	1088	948	1098	1032	1084	864	968	2334	2253	2214
EA667_008535|1-deoxy-D-xylulose-5-phosphate_reductoisomerase	721.74	-1.49435	0.0927706	-16.108	2.24e-58	5.11e-56	509	363	550	606	621	584	665	502	519	1224	1245	1190
EA667_009345|quinoprotein_glucose_dehydrogenase	1518.8	-1.49202	0.0940941	-15.8567	1.26e-56	2.76e-54	1171	806	1163	1102	1129	1241	1082	1001	1174	2595	2559	2953
EA667_008865|peptidase_M16	1373.41	-1.17524	0.0742887	-15.8199	2.27e-56	4.77e-54	1170	798	1229	1132	1128	1124	1227	996	969	2185	2167	2240
EA667_008970|internalin	2342.13	-1.20159	0.0760623	-15.7975	3.24e-56	6.56e-54	2037	1289	2081	1797	1997	2008	1868	1722	1791	3717	3770	3822
EA667_008985|phosphopyruvate_hydratase	3135.69	-1.42296	0.0903924	-15.7421	7.79e-56	1.52e-53	2511	1722	2321	2524	2806	2486	2474	1992	2188	5586	5462	5086
EA667_019185|amino_acid_ABC_transporter_substrate-binding_protein	1670.12	1.2791	0.0819264	15.6127	5.96e-55	1.12e-52	2135	1452	2196	2178	2045	2017	2233	2039	2110	698	676	808
EA667_008890|ribose-5-phosphate_isomerase_RpiA	946.563	-1.25738	0.0809351	-15.5356	1.99e-54	3.63e-52	763	487	785	783	846	860	849	793	711	1454	1409	1570
EA667_008530|phosphatidate_cytidylyltransferase	1024.43	-1.75099	0.112903	-15.5088	3.02e-54	5.33e-52	652	456	689	823	886	713	1018	658	727	1844	1956	1719
EA667_008555|UDP-3-O-(3-hydroxymyristoyl)glucosamine_N-acyltransferase	888.565	-1.26401	0.0816433	-15.4821	4.59e-54	7.84e-52	679	472	796	736	799	723	810	662	672	1376	1421	1458
EA667_008855|adenosine_kinase	1132.91	-1.39643	0.0910387	-15.3388	4.21e-53	6.97e-51	891	595	969	865	998	803	924	738	789	2005	1986	1884
EA667_008475|ornithine_carbamoyltransferase	1928.31	-1.25596	0.0823426	-15.2529	1.58e-52	2.53e-50	1602	1182	1694	1454	1619	1662	1303	1221	1303	3219	3303	3293
EA667_018670|D-lactate_dehydrogenase	195.361	-2.43319	0.161827	-15.0358	4.28e-51	6.68e-49	110	79	95	83	102	117	84	89	91	472	513	423
EA667_008980|3-deoxy-8-phosphooctulonate_synthase	2865.49	-1.35666	0.0910063	-14.9073	2.95e-50	4.49e-48	2311	1724	2134	2244	2534	2304	2204	1875	1981	4890	5013	4707
CP039930_3623793_3624098	1391.39	1.33455	0.089536	14.9052	3.05e-50	4.51e-48	1611	1364	1834	1813	1952	1717	1843	1683	1540	573	586	604
EA667_008885|threonine_ammonia-lyase,_biosynthetic	1230.87	-1.2521	0.0859876	-14.5614	4.94e-48	7.11e-46	979	673	1118	1005	1059	962	992	886	976	2049	2013	1934
EA667_008755|Grx4_family_monothiol_glutaredoxin	1701.31	-1.09898	0.0758801	-14.4831	1.55e-47	2.17e-45	1468	983	1515	1422	1472	1555	1445	1384	1314	2586	2584	2580
EA667_008905|N-acetyl-gamma-glutamyl-phosphate_reductase	715.616	-1.24737	0.0871263	-14.3168	1.72e-46	2.35e-44	589	400	636	556	629	552	612	492	536	1152	1118	1251
EA667_009450|type_I_secretion_C-terminal_target_domain-containing_protein	678.474	-1.33125	0.0933256	-14.2646	3.64e-46	4.85e-44	444	309	518	604	670	636	803	656	600	893	938	1086
EA667_008870|phospholipase	512.372	-1.43364	0.101545	-14.1182	2.93e-45	3.82e-43	376	251	399	444	430	408	507	385	381	821	765	946
EA667_008920|ATP-dependent_Clp_protease_ATP-binding_subunit_ClpA	2908.92	-1.02475	0.07403	-13.8423	1.42e-43	1.8e-41	2633	1754	2802	2489	2455	2459	2429	2051	2328	4443	4244	4645
EA667_008790|signal_recognition_particle-docking_protein_FtsY	1599.46	-1.15843	0.0838934	-13.8084	2.27e-43	2.82e-41	1373	949	1636	1117	1324	1328	1141	1034	1094	2661	2671	2688
CP039930_1771514_1771659	622.787	-1.59424	0.115966	-13.7475	5.27e-43	6.41e-41	424	356	464	413	405	450	407	439	495	1112	1107	1256
EA667_008760|aspartate_aminotransferase_family_protein	628.343	-1.35605	0.0990001	-13.6975	1.05e-42	1.25e-40	546	349	551	437	426	488	411	431	421	1061	1143	1170
EA667_008910|hypothetical_protein	657.599	-1.19162	0.087459	-13.6249	2.85e-42	3.31e-40	570	379	625	503	548	507	547	433	444	1023	1066	1188
EA667_005155|alpha-keto_acid_decarboxylase_family_protein	2639.04	1.10003	0.0811256	13.5596	6.95e-42	7.92e-40	3597	2351	3593	3257	3241	2846	3364	2959	3181	1355	1261	1451
TG31307_8_499_824	2015.07	-15.4167	1.18098	-13.0542	6.02e-39	6.71e-37	0	0	0	0	0	0	0	0	0	6946	7162	8382
EA667_008810|cytochrome_bd-I_oxidase_subunit_CydX	376.313	-1.46034	0.114246	-12.7824	2.06e-37	2.25e-35	272	176	287	360	379	298	333	256	288	608	569	667
EA667_008805|cytochrome_bd_biosynthesis_protein	415.781	-1.49478	0.117086	-12.7666	2.52e-37	2.7e-35	299	184	287	388	432	352	401	292	356	681	600	698
EA667_018680|transcriptional_regulator_LldR	122.21	-2.32863	0.183077	-12.7194	4.61e-37	4.85e-35	68	36	73	67	89	73	78	82	64	223	270	314
EA667_019335|hypothetical_protein	2131.07	0.967515	0.0763048	12.6796	7.67e-37	7.91e-35	3022	2222	3313	2339	2470	2467	2158	1954	2099	1368	1281	1361
EA667_000520|IS66_family_insertion_sequence_element_accessory_protein_TnpB	223.008	-1.97921	0.156316	-12.6616	9.65e-37	9.77e-35	137	73	175	133	151	133	210	154	111	457	444	460
EA667_007195|AMP-binding_protein	2290.69	1.09155	0.0865614	12.6101	1.86e-36	1.85e-34	2973	2096	3103	2757	2458	2224	3293	3004	2711	1101	1122	1296
EA667_008550|OmpH_family_outer_membrane_protein	1081.38	-1.08689	0.0870712	-12.4828	9.27e-36	9.05e-34	805	689	923	984	1007	910	1024	954	870	1556	1525	1662
EA667_008850|Rieske_(2Fe-2S)_protein	578.715	-1.41863	0.114003	-12.4437	1.51e-35	1.45e-33	425	343	443	476	485	417	438	375	454	952	1071	962
EA667_008705|1-phosphofructokinase	328.649	-1.45134	0.11685	-12.4205	2.02e-35	1.91e-33	237	178	252	254	284	267	282	208	266	538	538	598
TG31307_3_262658_262709	772.778	-1.31333	0.105915	-12.3999	2.62e-35	2.41e-33	637	456	610	576	720	547	623	538	566	1315	1339	1233
EA667_018675|alpha-hydroxy-acid_oxidizing_protein	103.098	-2.59809	0.209537	-12.3992	2.64e-35	2.41e-33	50	17	70	64	59	59	48	45	57	237	244	257
EA667_011445|hypothetical_protein	8993.71	1.12441	0.0917527	12.2548	1.58e-34	1.42e-32	12698	10724	16482	8338	8032	9335	9824	9189	8261	5152	5214	6496
EA667_008915|ATP-dependent_Clp_protease_adapter_ClpS	688.956	-1.17219	0.0961161	-12.1956	3.28e-34	2.89e-32	547	421	635	571	580	596	508	488	538	1014	1125	1172
EA667_001055|acetate--CoA_ligase	1310.21	1.01066	0.0837085	12.0735	1.46e-33	1.27e-31	1941	1253	1992	1549	1439	1328	1553	1320	1356	750	783	812
EA667_005880|hypothetical_protein	256.103	1.67624	0.143702	11.6647	1.93e-31	1.65e-29	406	361	572	256	204	242	239	244	219	121	131	132
EA667_008595|haloacid_dehalogenase	228.773	-1.654	0.143984	-11.4874	1.53e-30	1.28e-28	168	103	182	143	185	171	179	141	144	384	374	542
EA667_007560|hypothetical_protein	188.945	1.81239	0.158121	11.4621	2.05e-30	1.7e-28	368	285	354	154	179	182	174	168	169	85	69	112
EA667_019445|OXA-51 beta lactamase	8646.49	0.853749	0.0759373	11.2428	2.51e-29	2.05e-27	11648	7152	12211	9902	10616	11112	9798	8871	9491	5164	4889	5503
EA667_010065|CoA_transferase_subunit_A	4372.84	0.942995	0.0839362	11.2347	2.76e-29	2.22e-27	5341	3831	5976	5557	4748	4503	6140	5402	5024	2293	2257	2664
EA667_008825|hypothetical_protein	512.812	-1.23096	0.109821	-11.2088	3.69e-29	2.93e-27	400	256	419	479	426	472	500	449	441	713	669	923
TG31307_2_3249730_3249835	14445.6	0.94076	0.084587	11.1218	9.83e-29	7.68e-27	18712	16337	22304	14183	15232	15391	15844	16030	14138	8770	8807	10142
CP039930_1785680_1785778	105.276	-2.36376	0.212719	-11.1121	1.1e-28	8.44e-27	44	46	67	58	55	48	57	32	72	222	257	264
EA667_008995|cell_division_protein_FtsB	460.138	-1.2199	0.110311	-11.0588	1.99e-28	1.51e-26	378	239	485	337	367	331	388	362	287	704	756	859
EA667_005110|ferredoxin_reductase	247.68	-1.79812	0.164628	-10.9223	9.02e-28	6.75e-26	118	64	121	283	299	268	355	324	218	257	303	398
EA667_018510|CoA-acylating_methylmalonate-semialdehyde_dehydrogenase	2702.12	1.00792	0.0924714	10.8998	1.15e-27	8.53e-26	3191	2318	3833	3462	2891	2773	3926	3478	3151	1272	1411	1556
EA667_009380|histidine_kinase	418.799	-1.20595	0.110892	-10.8751	1.52e-27	1.1e-25	369	250	317	356	408	347	324	326	300	640	651	696
EA667_019530|hypothetical_protein	2424.07	0.912831	0.084368	10.8196	2.78e-27	2e-25	3115	2725	3990	2405	2321	2325	2872	2526	2435	1568	1507	1742
EA667_007970|hypothetical_protein	3126.72	-0.80022	0.0741256	-10.7955	3.62e-27	2.57e-25	2851	2146	3176	2630	2870	2770	2654	2651	2599	4189	4107	4782
EA667_008565|acyl-ACP--UDP-N-acetylglucosamine_O-acyltransferase	1536	-1.13207	0.105141	-10.7672	4.92e-27	3.45e-25	1349	714	1175	1517	1569	1367	1772	1392	1216	2206	2077	2138
EA667_011410|stress-induced_protein	3753.49	1.1669	0.108731	10.732	7.2e-27	4.99e-25	5093	4746	7466	3198	3258	3510	4354	3721	3327	1982	2386	2736
EA667_009385|hypothetical_protein	306.395	-1.3506	0.126561	-10.6716	1.38e-26	9.45e-25	238	173	218	241	254	276	293	269	206	521	462	493
CP039930_2368571_2368676	1351.74	1.3493	0.127449	10.587	3.42e-26	2.31e-24	1771	1658	2820	1385	1179	1403	1521	1435	1140	647	713	890
EA667_008735|branched-chain_amino_acid_transport_system_II_carrier_protein	365.006	-1.27219	0.120385	-10.5677	4.2e-26	2.8e-24	317	195	286	268	350	276	296	322	276	557	562	644
EA667_007015|hypothetical_protein	3448.68	1.31637	0.12491	10.5386	5.74e-26	3.78e-24	6077	4321	6846	2814	2877	3813	2681	3025	3263	1982	1848	2516
EA667_010070|CoA_transferase_subunit_B	2361.42	1.0802	0.103814	10.4051	2.35e-25	1.53e-23	3289	2245	3355	3145	2655	2291	3037	2551	2576	1345	1287	1207
CP039930_949760_949855	452.499	-9.73586	0.940417	-10.3527	4.07e-25	2.62e-23	0	4	2	0	10	3	3	7	5	1802	1518	1685
EA667_010075|short-chain_fatty_acid_transporter	3017.27	1.19271	0.11528	10.3462	4.35e-25	2.77e-23	4717	3318	4160	3637	3550	3327	3063	2717	3414	1669	1754	1497
EA667_019300|peptide-methionine_(R)-S-oxide_reductase_MsrB	498.374	1.12939	0.109431	10.3206	5.69e-25	3.57e-23	714	410	752	566	570	617	595	561	588	253	255	267
EA667_015210|trehalose-phosphatase	166.417	1.7077	0.167362	10.2036	1.91e-24	1.19e-22	292	303	437	124	118	120	112	96	116	104	86	102
EA667_008765|CBS_domain-containing_protein	980.457	-0.860918	0.0845245	-10.1854	2.3e-24	1.42e-22	938	663	1030	760	782	878	800	723	765	1408	1403	1558
EA667_019790|N4-gp56_family_major_capsid_protein	801.642	0.900966	0.0887326	10.1537	3.19e-24	1.94e-22	959	687	1135	965	938	985	1020	941	872	413	440	506
EA667_009000|2-C-methyl-D-erythritol_4-phosphate_cytidylyltransferase	233.774	-1.26337	0.124859	-10.1183	4.58e-24	2.75e-22	182	136	227	159	196	189	186	167	144	375	401	417
EA667_008560|3-hydroxyacyl-ACP_dehydratase_FabZ	1255.48	-1.01233	0.100136	-10.1096	5.01e-24	2.98e-22	1129	649	1022	1349	1246	1101	1336	1151	990	1730	1693	1708
EA667_003085|peroxiredoxin	344.826	1.35878	0.134551	10.0987	5.6e-24	3.29e-22	619	501	759	258	271	331	260	243	273	232	177	265
CP039930_2361689_2362173	438.646	1.29949	0.129033	10.071	7.42e-24	4.32e-22	714	674	894	325	332	419	374	355	352	252	296	313
EA667_008570|tetratricopeptide_repeat_protein	1080.97	-0.84646	0.08482	-9.97949	1.87e-23	1.08e-21	1061	778	1145	832	940	938	759	731	775	1631	1598	1689
EA746_019935|TonB-dependent_receptor	161.041	-11.7716	1.18508	-9.93316	2.99e-23	1.7e-21	0	0	0	0	0	0	0	0	0	580	552	665
EA667_008495|nitrogen_regulation_protein_NR(I)	537.513	-0.946933	0.0961936	-9.84403	7.27e-23	4.1e-21	446	290	483	522	539	525	580	445	504	695	712	731
EA667_008740|type_I_methionyl_aminopeptidase	482.834	-0.999181	0.102315	-9.76569	1.58e-22	8.82e-21	408	267	458	454	412	439	458	413	424	655	623	785
EA667_010240|thiamine_pyrophosphate-dependent_dehydrogenase_E1_component_subunit_alpha	1183.98	1.01205	0.103751	9.75458	1.76e-22	9.74e-21	1330	707	1198	1618	1576	1417	1990	1774	1625	441	463	550
EA667_008455|D-amino_acid_dehydrogenase	1018.05	-1.0637	0.110105	-9.66078	4.42e-22	2.42e-20	922	587	1028	731	792	938	737	786	812	1519	1445	1856
TG31307_2_2745785_2745991	173.312	1.54784	0.162001	9.55448	1.24e-21	6.72e-20	225	164	277	220	229	196	243	202	182	62	58	88
CP039930_3508725_3509170	364.471	-1.03949	0.108899	-9.54546	1.36e-21	7.26e-20	333	224	371	292	280	263	287	291	264	578	512	650
EA667_019385|amidohydrolase	163.028	1.74014	0.182867	9.51589	1.8e-21	9.56e-20	276	147	243	202	229	192	181	155	212	63	51	67
EA667_011430|iron-containing_redox_enzyme_family_protein	939.938	0.961068	0.101153	9.50117	2.08e-21	1.09e-19	1506	1225	1780	792	734	883	808	705	817	685	682	767
EA667_019245|hypothetical_protein	185.039	1.4439	0.152065	9.49528	2.2e-21	1.14e-19	290	220	320	182	210	211	171	183	196	97	83	100
CP039930_1758326_1758411	364.149	-1.33488	0.14085	-9.47729	2.61e-21	1.35e-19	317	218	230	265	306	335	298	278	278	599	636	551
EA667_019265|tautomerase_family_protein	289.738	1.38549	0.146832	9.43584	3.88e-21	1.98e-19	425	317	387	298	329	375	329	344	340	114	122	165
EA667_011070|trifunctional_transcriptional_regulator/proline_dehydrogenase/L-glutamate_gamma-semialdehyde_dehydrogenase	4217	-0.712679	0.0757081	-9.41352	4.8e-21	2.43e-19	3387	2538	4164	4281	4182	3876	5216	4087	4133	4723	5040	5327
EA667_008930|3-deoxy-7-phosphoheptulonate_synthase	991.75	-0.866062	0.0929201	-9.32051	1.16e-20	5.81e-19	858	614	938	926	823	885	1089	868	886	1326	1173	1528
EA667_008380|molybdopterin_molybdotransferase_MoeA	153.382	-1.53701	0.165829	-9.26863	1.89e-20	9.37e-19	115	92	112	110	126	143	93	67	95	286	306	260
EA667_019180|amino_acid_ABC_transporter_permease	416.459	1.26619	0.13775	9.19199	3.86e-20	1.9e-18	583	334	485	598	600	485	546	448	533	190	178	163
EA746_019930|sel1_repeat_family_protein	89.247	-10.9199	1.18857	-9.18749	4.02e-20	1.96e-18	0	0	0	0	0	0	0	0	0	328	310	357
EA667_008770|DUF2750_domain-containing_protein	1034.26	-0.976876	0.106811	-9.14587	5.92e-20	2.86e-18	974	790	1057	671	826	867	649	581	696	1666	1724	1737
EA746_019965|septicolysin	85.1245	-10.8515	1.18901	-9.12645	7.08e-20	3.4e-18	0	0	0	0	0	0	0	0	0	299	322	327
EA667_019475|biotin_synthase_BioB	1406.49	0.801967	0.0880043	9.11282	8.03e-20	3.82e-18	1596	1031	1615	1862	1992	1656	2016	1829	1543	743	698	778
EA667_006760|DUF2171_domain-containing_protein	3713.26	1.10179	0.120937	9.11046	8.2e-20	3.87e-18	6154	5570	8025	2489	2891	3461	2351	2637	2713	2636	2752	3127
EA667_001095|DUF485_domain-containing_protein	1835.81	0.699298	0.0769758	9.08465	1.04e-19	4.86e-18	2360	1610	2524	2142	2014	1845	2246	2058	2021	1209	1155	1288
EA667_019310|dicarboxylate/amino_acid:cation_symporter	4960.22	0.941234	0.10377	9.07035	1.19e-19	5.5e-18	7005	4484	5913	6047	6679	6241	5600	4764	5757	2844	2851	2623
EA746_019945|BrnT_family_toxin	81.1523	-10.7831	1.18979	-9.06301	1.27e-19	5.83e-18	0	0	0	0	0	0	0	0	0	292	273	341
EA746_019875|acetyltransferase	109.869	1.87336	0.20682	9.05791	1.33e-19	6.06e-18	142	99	152	139	163	130	147	148	142	30	35	33
EA667_019190|glutathione_S-transferase	384.727	1.14366	0.1265	9.04078	1.56e-19	7.03e-18	477	269	530	516	444	522	542	475	474	176	153	192
CP039930_1408514_1408661	1297.5	1.17958	0.130542	9.03603	1.62e-19	7.28e-18	2096	2068	2942	859	966	1104	780	967	933	912	972	1023
EA667_009695|IclR_family_transcriptional_regulator	166.766	-1.2923	0.143736	-8.99083	2.45e-19	1.09e-17	131	89	141	123	156	138	142	127	133	284	256	266
EA667_019295|glutathione_peroxidase	764.093	0.996492	0.111103	8.96906	2.99e-19	1.32e-17	1128	672	1085	859	831	1036	896	722	851	434	429	451
EA667_008895|M48_family_metallopeptidase	155.094	-1.40684	0.157461	-8.93456	4.09e-19	1.79e-17	115	97	121	107	135	94	142	118	92	264	257	294
EA667_010030|GntP_family_permease	278.482	1.15754	0.129823	8.91627	4.82e-19	2.09e-17	400	276	394	341	327	290	358	290	302	160	143	136
EA667_019785|hypothetical_protein	197.73	1.32778	0.149033	8.9093	5.14e-19	2.21e-17	261	198	288	203	220	239	242	267	235	88	88	97
CP039930_1078607_1078747	610.188	1.1237	0.126415	8.88899	6.17e-19	2.63e-17	886	641	815	667	789	769	620	584	694	351	346	293
EA667_008375|bifunctional_molybdenum_cofactor_biosynthesis_protein_MoaC/MoaB	164.467	-1.36863	0.154052	-8.88419	6.44e-19	2.73e-17	154	85	120	131	143	131	131	98	114	285	294	266
EA667_011485|AMP-binding_protein	3433.51	0.814988	0.0918099	8.87691	6.87e-19	2.89e-17	4631	3314	4418	4122	3907	3543	3946	3586	3963	2154	2183	2136
EA667_008935|alpha/beta_hydrolase	211.223	-1.20049	0.135379	-8.86768	7.47e-19	3.12e-17	178	113	238	134	158	144	161	144	147	323	364	412
EA667_011420|SDR_family_oxidoreductase	584.01	1.11852	0.128333	8.71581	2.89e-18	1.2e-16	955	815	1334	408	429	532	438	419	446	392	383	538
EA667_019800|hypothetical_protein	375.581	1.02362	0.117989	8.67554	4.12e-18	1.69e-16	455	370	564	378	456	450	452	441	412	185	209	233
EA667_014025|copper_resistance_protein_NlpE	1055.05	1.041	0.120257	8.65648	4.87e-18	1.99e-16	1663	1266	1904	943	1082	1136	816	837	1032	711	618	831
EA667_009625|hypothetical_protein	98.6842	-1.59292	0.184209	-8.64737	5.27e-18	2.13e-16	64	49	75	75	84	80	64	82	77	167	163	189
CP039931_30630_31096	975.257	0.982604	0.113852	8.63055	6.11e-18	2.45e-16	1411	920	1123	1124	1327	1238	1099	991	1098	548	537	527
TG31307_2_3340311_3340777	974.381	0.970354	0.112469	8.62776	6.26e-18	2.5e-16	1323	981	1081	1197	1316	1270	1126	970	1038	540	530	538
CP039930_3865644_3866086	78.0753	-1.9574	0.227456	-8.60562	7.59e-18	3.01e-16	55	50	42	31	27	45	49	38	32	176	197	159
EA667_010250|transcriptional_regulator	375.798	1.08317	0.125956	8.59957	8e-18	3.15e-16	513	383	570	449	404	329	469	475	376	206	213	215
EA667_009845|hypothetical_protein	119.272	1.77124	0.206401	8.58156	9.36e-18	3.66e-16	221	205	258	85	84	127	84	99	92	54	49	84
CP039930_3828027_3828192	621.122	1.05397	0.12299	8.56956	1.04e-17	4.03e-16	668	552	990	762	707	608	884	830	683	293	304	373
EA667_019390|hydrolase	67.8693	2.35037	0.274391	8.56578	1.07e-17	4.13e-16	103	71	117	96	81	92	73	66	89	12	22	18
TG31307_2_242780_242927	1325.99	1.15607	0.135491	8.53246	1.43e-17	5.48e-16	2140	2168	2884	849	1004	1219	801	928	932	968	967	1072
EA746_019940|toxin-antitoxin_system,_antitoxin_component	53.9352	-10.194	1.19513	-8.52963	1.47e-17	5.58e-16	0	0	0	0	0	0	0	0	0	176	189	238
EA667_015530|ribonucleotide-diphosphate_reductase_subunit_beta	5762.58	-0.605267	0.0711821	-8.50308	1.85e-17	6.96e-16	4953	3413	5821	5992	6264	6082	6924	5343	5452	6310	6665	6621
EA667_005145|aldehyde_dehydrogenase_family_protein	3796.94	0.59778	0.0705217	8.47654	2.32e-17	8.69e-16	4433	3097	4968	4511	4197	4218	4802	4385	4372	2337	2434	2772
EA667_009570|methylenetetrahydrofolate_reductase	160.602	-1.36945	0.161607	-8.47397	2.37e-17	8.82e-16	131	86	145	114	129	132	111	75	130	290	268	293
EA667_009520|NAD(P)-dependent_alcohol_dehydrogenase	98.3216	-1.60968	0.190187	-8.46369	2.59e-17	9.57e-16	99	41	82	54	75	66	51	44	37	202	214	194
CP039930_2368065_2368349	48554.7	0.876811	0.104068	8.42536	3.6e-17	1.32e-15	58437	55253	80099	47889	49461	51904	48006	52755	48886	29295	31586	36941
EA667_019795|hypothetical_protein	408.314	0.958024	0.113728	8.42384	3.64e-17	1.33e-15	515	308	596	447	466	511	564	493	484	204	217	239
TG31307_2_3256233_3256717	423.115	1.33072	0.1587	8.38512	5.07e-17	1.83e-15	593	620	930	275	338	401	394	398	394	203	262	325
EA667_010315|hypothetical_protein	198.513	1.36567	0.163169	8.36968	5.78e-17	2.08e-15	343	188	475	197	172	175	200	181	181	99	113	136
EA667_008315|Y-family_DNA_polymerase	34.5485	-2.91564	0.350427	-8.32024	8.78e-17	3.14e-15	7	10	21	12	16	23	12	18	20	93	73	95
EA667_015595|DUF1852_domain-containing_protein	560.213	-0.880194	0.105864	-8.31438	9.22e-17	3.27e-15	489	326	463	520	635	542	637	510	473	697	757	698
EA667_015590|methionine_synthase	435.364	-1.0547	0.126897	-8.31143	9.46e-17	3.34e-15	330	197	320	450	449	437	656	443	394	485	565	550
EA667_011440|hypothetical_protein	89843	0.826068	0.0997293	8.2831	1.2e-16	4.21e-15	107054	96141	147609	89670	91029	97966	90853	100691	91144	55813	58251	68386
EA667_012420|DUF4142_domain-containing_protein	1244.78	1.05685	0.127814	8.26865	1.35e-16	4.72e-15	1613	1699	2421	1007	964	1133	1284	1324	1070	738	832	993
EA667_019450|N-acetyltransferase_family_protein	517.995	0.936321	0.113565	8.24479	1.65e-16	5.73e-15	632	512	828	580	555	554	675	604	472	287	294	363
EA667_019525|DMT_family_transporter	6789.66	0.746918	0.0906794	8.2369	1.77e-16	6.08e-15	8059	6704	11302	6844	6368	6572	8382	7616	6919	4249	4555	5408
TG31307_2_2949478_2949532	21.8607	-3.81437	0.463496	-8.22955	1.88e-16	6.42e-15	6	4	6	4	11	7	1	2	2	67	60	79
EA667_008250|PAAR_domain-containing_protein	861.948	-0.878027	0.106947	-8.20994	2.21e-16	7.52e-15	808	640	969	641	635	679	585	520	685	1314	1320	1442
EA667_016715|HdeD_family_acid-resistance_protein	178.692	1.25335	0.15294	8.19505	2.5e-16	8.45e-15	247	192	346	184	199	206	180	175	168	90	88	122
EA667_008265|Y-family_DNA_polymerase	41.5095	-2.57412	0.314344	-8.18884	2.64e-16	8.85e-15	19	6	29	21	30	20	27	22	28	104	70	113
EA746_019975|helix-turn-helix_transcriptional_regulator	41.404	-9.8126	1.1993	-8.18194	2.79e-16	9.31e-15	0	0	0	0	0	0	0	0	0	137	142	184
EA667_008875|potassium_transporter_TrkH	129.885	-1.3874	0.171613	-8.08448	6.24e-16	2.07e-14	95	81	106	83	116	104	112	88	74	255	195	229
CP039930_3258153_3258240	54.6403	-8.37923	1.03889	-8.06556	7.29e-16	2.4e-14	0	0	2	0	0	1	0	0	0	185	201	221
EA667_000335|4-hydroxyphenylpyruvate_dioxygenase	909.516	1.10222	0.137135	8.03746	9.17e-16	3e-14	898	626	957	1306	1283	848	1742	1439	1124	329	373	354
CP039931_6013_6107	181.494	1.32276	0.164803	8.02629	1e-15	3.27e-14	240	180	224	246	240	203	234	206	217	84	88	65
CP039930_3869668_3870040	21.2674	-3.97446	0.496046	-8.01227	1.13e-15	3.64e-14	5	0	10	5	0	2	5	4	2	64	61	85
TG31307_2_3614207_3614323	400.867	1.14466	0.143068	8.00079	1.24e-15	3.98e-14	614	442	515	536	467	380	495	390	399	245	202	211
EA667_004180|MBL_fold_metallo-hydrolase	429.145	0.883754	0.110624	7.98878	1.36e-15	4.36e-14	493	309	535	535	534	475	652	560	548	209	197	253
EA746_019980|type_II_toxin-antitoxin_system_RelE/ParE_family_toxin	35.4066	-9.58632	1.20144	-7.97903	1.47e-15	4.69e-14	0	0	0	0	0	0	0	0	0	132	118	145
EA667_009340|LysR_family_transcriptional_regulator	264.152	-1.03144	0.129714	-7.95162	1.84e-15	5.82e-14	255	157	226	237	196	231	254	207	201	364	371	460
TG31307_2_3379095_3379207	691.536	0.800716	0.100953	7.93159	2.16e-15	6.8e-14	884	746	1117	648	619	652	840	747	717	496	415	540
EA667_008490|TetR/AcrR_family_transcriptional_regulator	128.661	-1.29008	0.163116	-7.90899	2.59e-15	8.11e-14	87	83	124	96	86	87	119	101	82	202	222	236
TG31307_3_261844_261929	130.538	-1.44365	0.182896	-7.89331	2.94e-15	9.14e-14	124	49	85	108	110	115	108	119	106	195	230	209
EA667_008690|hypothetical_protein	153.068	-1.25091	0.158748	-7.87986	3.28e-15	1.01e-13	111	97	141	134	146	97	106	111	110	252	253	257
EA667_012650|hypothetical_protein	2094.04	0.723693	0.0919413	7.87126	3.51e-15	1.08e-13	2803	2300	3605	1961	2098	2184	1844	1904	1920	1525	1523	1793
EA667_018505|3-hydroxyisobutyrate_dehydrogenase	1053.93	0.923044	0.117339	7.86644	3.65e-15	1.11e-13	1475	1068	1314	1347	1170	1176	1212	1008	1207	593	690	597
CP039930_1458665_1458897	241.743	1.21702	0.155156	7.84385	4.37e-15	1.33e-13	406	307	424	225	204	278	185	223	234	130	149	172
EA667_008270|translesion_error-prone_DNA_polymerase_V_autoproteolytic_subunit	47.9192	-2.02565	0.258518	-7.8356	4.67e-15	1.41e-13	34	19	27	26	29	28	44	26	33	91	94	113
EA667_009515|4-carboxymuconolactone_decarboxylase	49.4612	-1.95928	0.250221	-7.83019	4.87e-15	1.46e-13	31	19	36	29	33	29	41	25	36	97	97	110
EA667_011455|hypothetical_protein	154.424	1.21365	0.155352	7.81226	5.62e-15	1.68e-13	216	177	267	154	164	179	171	164	137	86	81	94
CP039930_3825526_3825607	283.75	1.14069	0.14623	7.80066	6.16e-15	1.83e-13	425	333	363	356	314	338	286	263	300	149	169	155
EA667_008400|TusE/DsrC/DsvC_family_sulfur_relay_protein	126.079	-1.31163	0.168411	-7.78828	6.79e-15	2.01e-13	98	66	119	111	108	83	105	95	78	236	202	199
EA667_019175|amino_acid_ABC_transporter_permease	450.865	1.03191	0.132874	7.76612	8.09e-15	2.38e-13	620	391	525	549	597	586	561	428	593	225	235	229
TG31307_3_171561_171784	123.304	-1.2296	0.159599	-7.7043	1.32e-14	3.85e-13	101	63	117	108	102	110	100	81	92	204	189	205
EA667_019270|formate-dependent_phosphoribosylglycinamide_formyltransferase	790.369	0.681724	0.0889156	7.66709	1.76e-14	5.12e-13	992	653	1188	860	908	875	979	814	839	489	536	576
EA667_008685|EAL_domain-containing_protein	504.055	-0.775995	0.101385	-7.65395	1.95e-14	5.64e-13	486	322	591	404	387	395	482	453	355	698	690	785
CP039930_616623_616965	103.17	1.5061	0.197469	7.62706	2.4e-14	6.91e-13	192	167	216	80	79	93	64	77	89	73	57	57
EA667_000350|maleylacetoacetate_isomerase	129.978	1.81756	0.239151	7.60006	2.96e-14	8.47e-13	122	83	165	204	160	120	296	216	166	26	31	38
EA667_015520|ribonucleoside-diphosphate_reductase_subunit_alpha	10929.5	-0.514308	0.0680716	-7.55541	4.18e-14	1.19e-12	10409	7513	11634	10837	11294	10915	11863	9175	9728	12904	12799	12869
EA667_008240|hypothetical_protein	580.084	-0.91402	0.12119	-7.54202	4.63e-14	1.31e-12	580	428	577	385	492	503	400	335	436	923	950	872
EA667_008880|TrkA_family_potassium_uptake_protein	161.788	-1.11773	0.148311	-7.53641	4.83e-14	1.36e-12	139	117	140	132	126	130	129	97	112	281	252	260
EA667_012550|four-helix_bundle_copper-binding_protein	221.895	1.22528	0.164019	7.47036	8e-14	2.24e-12	352	312	517	152	160	220	167	156	196	135	148	180
EA667_019170|amino_acid_ABC_transporter_ATP-binding_protein	501.365	0.907407	0.121828	7.44826	9.46e-14	2.64e-12	646	363	538	631	732	745	631	545	607	236	235	282
EA667_006960|dicarboxylate/amino_acid:cation_symporter	569.248	-0.861988	0.116078	-7.42597	1.12e-13	3.11e-12	453	246	389	683	657	606	837	699	565	569	599	630
EA667_009065|glucose/quinate/shikimate_family_membrane-bound_PQQ-dependent_dehydrogenase	95.0028	-1.47475	0.198917	-7.41388	1.23e-13	3.39e-12	67	29	75	85	90	106	101	80	85	122	139	167
EA667_008960|alpha/beta_hydrolase	99.2052	-1.37047	0.184929	-7.41082	1.26e-13	3.45e-12	87	55	81	66	83	83	58	73	62	149	175	204
EA667_015215|trehalose-6-phosphate_synthase	1470.94	0.759915	0.102735	7.39686	1.39e-13	3.81e-12	2319	1723	3003	1136	1211	1418	1064	1037	1164	1200	1242	1341
EA667_005160|amino_acid_permease	1033.41	1.04147	0.141546	7.35782	1.87e-13	5.09e-12	1574	1044	1209	1171	1261	1419	1056	906	1256	565	618	536
CP039931_76985_77097	705.457	0.798698	0.108632	7.35231	1.95e-13	5.27e-12	888	789	1109	729	654	685	895	697	662	492	437	552
TG31307_2_192544_192776	248.772	1.05849	0.144	7.35065	1.97e-13	5.31e-12	429	273	434	199	232	281	224	217	251	156	148	194
EA667_014030|isocitrate_lyase	1975	1.37055	0.18666	7.34252	2.1e-13	5.62e-12	2500	2700	4764	1586	1550	1787	1925	1998	1751	1111	1087	1334
EA667_009885|hypothetical_protein	157.665	1.25817	0.171567	7.33344	2.24e-13	5.98e-12	218	169	270	142	160	200	196	173	157	70	71	111
TG31307_2_2962158_2962386	34.2772	-2.29528	0.314471	-7.29886	2.9e-13	7.7e-12	23	15	18	9	11	23	14	17	14	77	77	99
EA667_009620|deoxyguanosinetriphosphate_triphosphohydrolase_family_protein	410.644	-0.811157	0.111142	-7.29835	2.91e-13	7.7e-12	389	297	417	364	350	342	351	330	287	538	532	714
CP039930_2889291_2889879	422.617	1.09075	0.149974	7.27292	3.52e-13	9.25e-12	480	546	844	375	352	425	446	447	410	249	252	311
CP039930_1751041_1751153	99.3122	-1.31105	0.181139	-7.23784	4.56e-13	1.19e-11	82	62	78	84	97	72	70	61	64	185	157	164
EA667_010230|2-oxo_acid_dehydrogenase_subunit_E2	1106.18	0.872014	0.120685	7.22555	4.99e-13	1.3e-11	1204	530	1100	1566	1555	1480	1866	1574	1517	411	458	516
EA667_005115|acyl-CoA_desaturase	411.578	-1.88866	0.26191	-7.21111	5.55e-13	1.44e-11	187	96	253	415	387	356	656	521	351	493	461	817
EA667_008245|hypothetical_protein	872.174	-0.868843	0.120959	-7.18295	6.82e-13	1.76e-11	831	640	998	619	646	731	568	494	707	1349	1399	1375
EA667_019105|GlsB/YeaQ/YmgE_family_stress_response_membrane_protein	303.137	0.98195	0.137317	7.15098	8.62e-13	2.21e-11	461	326	504	308	277	324	263	303	330	208	172	218
TG31307_3_273371_273548	236.537	-0.971774	0.13752	-7.0664	1.59e-12	4.06e-11	196	132	263	174	173	211	218	209	210	319	318	414
EA667_008580|regulatory_protein_RecX	122.431	-1.19811	0.170031	-7.04641	1.84e-12	4.67e-11	102	96	111	63	82	78	100	86	65	226	221	209
EA667_001010|putative_porin	2472.7	0.635965	0.0904509	7.03105	2.05e-12	5.19e-11	3134	2057	3668	2701	2628	2892	2881	2571	2625	1544	1567	2070
TG31307_2_3363870_3364406	220.989	1.08077	0.153915	7.02189	2.19e-12	5.52e-11	285	180	257	294	245	257	302	318	269	106	83	124
EA667_004990|NADP-dependent_isocitrate_dehydrogenase	733.46	-0.643361	0.0918332	-7.00576	2.46e-12	6.16e-11	661	411	650	712	761	783	852	776	820	761	817	874
EA667_008745|LysR_family_transcriptional_regulator	353.756	-0.768268	0.109764	-6.99928	2.57e-12	6.42e-11	320	250	390	300	260	300	322	291	300	489	497	509
TG31307_5_10594_11321	106.763	-1.31798	0.189262	-6.96376	3.31e-12	8.23e-11	77	59	87	116	86	83	73	93	86	183	152	174
EA667_001085|hypothetical_protein	540.94	0.71403	0.102588	6.9602	3.4e-12	8.41e-11	795	530	888	475	547	573	523	500	541	401	384	443
TG31307_2_3393530_3393601	217.346	0.96859	0.139372	6.94968	3.66e-12	9.02e-11	306	182	329	248	238	223	306	241	229	116	113	150
EA746_019970|hypothetical_protein	16.7524	-8.50683	1.22566	-6.94061	3.9e-12	9.57e-11	0	0	0	0	0	0	0	0	0	65	52	70
CP039930_3199981_3200310	1125.24	-0.631681	0.0911809	-6.92778	4.28e-12	1.04e-10	1068	762	1005	1101	1260	1136	1192	963	1024	1369	1352	1320
EA667_009510|cupin_domain-containing_protein	58.0136	-1.56855	0.227176	-6.90453	5.04e-12	1.22e-10	40	28	55	32	42	40	44	32	42	101	116	114
EA667_010235|alpha-ketoacid_dehydrogenase_subunit_beta	1056.38	0.857486	0.124242	6.90172	5.14e-12	1.24e-10	1184	515	1114	1511	1485	1344	1792	1426	1405	424	454	507
EA667_009250|FadR_family_transcriptional_regulator	128.068	-1.14293	0.165733	-6.89621	5.34e-12	1.29e-10	93	75	132	87	99	116	125	110	89	203	180	221
EA667_008410|hypothetical_protein	166.348	-1.0036	0.145801	-6.88336	5.85e-12	1.4e-10	149	110	174	120	114	121	150	114	135	258	225	312
EA667_002240|30S_ribosomal_protein_S19	9507.89	-0.53005	0.0771895	-6.86687	6.56e-12	1.57e-10	8009	5076	8495	11035	11632	10621	13284	10059	9472	9306	9391	9573
TG31307_3_180498_180924	489.12	-0.745275	0.108625	-6.86097	6.84e-12	1.63e-10	440	381	467	409	392	404	466	460	414	616	634	755
EA667_009105|phosphotransferase_family_protein	122.349	-1.11163	0.162038	-6.8603	6.87e-12	1.63e-10	113	69	116	94	101	91	103	90	96	214	167	205
EA667_017130|DNA-binding_protein	462.544	0.772567	0.112674	6.85668	7.05e-12	1.66e-10	625	410	786	447	450	464	529	515	483	288	289	389
EA667_017450|hypothetical_protein	202.498	1.02913	0.150188	6.85223	7.27e-12	1.71e-10	315	193	372	186	184	225	195	233	193	122	120	148
EA667_008405|DsrH_like_protein	95.3472	-1.26848	0.185162	-6.85069	7.35e-12	1.72e-10	84	60	77	78	79	61	83	57	62	177	145	167
EA667_011060|sodium/proline_symporter_PutP	1045.18	-0.768673	0.112381	-6.83986	7.93e-12	1.84e-10	1019	565	837	1145	1138	1080	1186	889	1019	1324	1266	1158
EA667_011525|indolepyruvate_ferredoxin_oxidoreductase_family_protein	8219.8	0.538938	0.0788636	6.8338	8.27e-12	1.92e-10	9479	7246	10398	9773	8900	8304	10505	9082	9464	5680	5728	5754
EA667_011100|polyisoprenoid-binding_protein	632.871	0.665662	0.0975072	6.8268	8.68e-12	2e-10	817	584	964	674	702	685	657	623	669	405	441	515
TG31307_3_302133_302368	71.4204	-1.39349	0.204154	-6.82571	8.75e-12	2.01e-10	55	39	54	61	66	52	64	50	52	118	117	121
EA667_012455|hypothetical_protein	362.164	0.886568	0.130151	6.81183	9.64e-12	2.2e-10	550	426	688	312	245	318	351	366	321	256	235	334
EA667_019570|PLxRFG_domain-containing_protein	612.567	0.702914	0.103307	6.80413	1.02e-11	2.32e-10	735	462	870	658	672	751	827	746	674	339	387	423
EA667_008370|molybdenum_cofactor_biosynthesis_protein_MoaE	104.566	-1.25325	0.18432	-6.79929	1.05e-11	2.39e-10	93	58	89	81	88	95	70	76	71	138	203	181
EA667_001100|cation_acetate_symporter	3353.45	0.614034	0.090473	6.78693	1.15e-11	2.59e-10	4519	2847	4239	4020	3779	3581	3950	3434	3722	2299	2434	2178
EA667_012045|type_VI_secretion_system_baseplate_subunit_TssF	871.294	-0.61568	0.0907574	-6.78381	1.17e-11	2.63e-10	773	517	884	950	964	810	997	819	809	1012	1018	994
EA667_011495|isovaleryl-CoA_dehydrogenase	3154.46	0.577529	0.085289	6.77143	1.28e-11	2.86e-10	3872	2390	4326	3714	3228	3077	4374	3676	3663	2073	2057	2285
CP039930_1928694_1928929	73.4871	-1.47539	0.217953	-6.7693	1.29e-11	2.89e-10	51	50	49	57	44	55	68	43	60	118	134	136
TG31307_3_94118_94270	112.647	-1.25376	0.185305	-6.76594	1.32e-11	2.94e-10	105	85	71	79	77	82	92	82	71	190	183	209
CP039931_61688_61766	1037.36	0.764489	0.113558	6.73212	1.67e-11	3.7e-10	1483	794	1345	1185	1249	1413	1133	1025	1202	599	609	724
CP039931_7001_7537	244.901	0.979789	0.145838	6.71836	1.84e-11	4.05e-10	327	204	286	330	293	307	316	285	285	136	96	148
EA667_009110|histidine_phosphatase_family_protein	68.7043	-1.46649	0.218553	-6.70998	1.95e-11	4.27e-10	50	36	54	46	65	67	51	51	43	109	100	146
EA667_015340|hypothetical_protein	1363.83	0.669713	0.100188	6.68459	2.32e-11	5.06e-10	1800	1371	2320	1219	1275	1480	1327	1350	1329	970	976	1206
EA667_007550|mechanosensitive_ion_channel	218.267	0.910596	0.136344	6.67866	2.41e-11	5.25e-10	363	257	379	192	209	246	172	175	173	173	160	153
EA667_002220|50S_ribosomal_protein_L3	29305.3	-0.47273	0.0708158	-6.67548	2.46e-11	5.35e-10	25485	18165	28216	32442	34330	30744	37932	29248	28328	29390	30871	30856
EA667_002225|50S_ribosomal_protein_L4	15466.4	-0.457246	0.0685101	-6.67414	2.49e-11	5.37e-10	13321	9785	14855	16970	17849	16416	20022	15785	15095	15724	15922	16062
EA667_003265|sel1_repeat_family_protein	292.406	0.785829	0.117761	6.67306	2.51e-11	5.39e-10	397	272	477	317	316	287	315	290	305	191	203	210
EA667_011935|DUF333_domain-containing_protein	659.54	0.846096	0.126967	6.66389	2.67e-11	5.72e-10	971	737	1132	588	681	777	497	552	638	451	450	549
EA667_011415|hypothetical_protein	27.9886	2.86216	0.429775	6.65966	2.74e-11	5.86e-10	57	51	110	16	10	31	11	12	20	5	13	9
EA667_019805|hypothetical_protein	247.114	0.909302	0.136584	6.65744	2.79e-11	5.93e-10	291	225	338	284	298	307	271	313	284	124	139	154
EA667_014915|EcsC_family_protein	1891.45	0.51525	0.0774191	6.65534	2.83e-11	5.99e-10	2455	1771	2781	1948	1902	2093	1945	1799	1864	1481	1400	1602
EA667_009245|hypothetical_protein	590.853	-0.609388	0.0918332	-6.63581	3.23e-11	6.81e-10	511	401	626	567	603	567	650	552	503	673	705	770
EA667_012625|peroxiredoxin	7483.04	-0.495756	0.0748055	-6.62726	3.42e-11	7.19e-10	7514	4912	8321	6802	6988	7678	7653	6994	6948	8335	8242	10042
CP039930_3203336_3203473	801.661	-0.62863	0.0949039	-6.62386	3.5e-11	7.33e-10	636	480	789	840	876	845	955	817	785	797	986	902
EA667_003680|IS66-like_element_ISAba25_family_transposase	4661.96	-0.453127	0.0685049	-6.61452	3.73e-11	7.78e-10	5022	3479	5980	3930	3927	3902	4090	3796	3904	5777	6004	6224
EA667_001980|hypothetical_protein	236.402	0.884098	0.133884	6.60345	4.02e-11	8.35e-10	396	270	444	219	236	261	152	165	187	170	184	194
EA667_019320|DNA_polymerase_III_subunit_alpha	981.721	0.523464	0.0793545	6.59652	4.21e-11	8.72e-10	1141	788	1249	1150	1250	1134	1244	1031	1035	641	669	708
CP039930_1757546_1757597	72.6569	-1.43614	0.217938	-6.58967	4.41e-11	9.1e-10	41	48	64	49	68	64	47	46	49	109	141	132
EA667_008900|hypothetical_protein	145.668	-1.06816	0.162287	-6.5819	4.64e-11	9.55e-10	125	62	160	119	129	124	126	140	116	204	214	234
EA667_008460|hypothetical_protein	149.428	-0.975356	0.148433	-6.57101	5e-11	1.02e-09	146	96	159	104	117	113	123	95	110	214	221	285
EA667_006785|NirD/YgiW/YdeI_family_stress_tolerance_protein	125.756	1.22454	0.186644	6.56087	5.35e-11	1.09e-09	205	139	273	112	100	107	100	143	122	81	64	94
TG31307_3_269102_269214	127.917	-1.09463	0.167925	-6.51856	7.1e-11	1.44e-09	132	88	102	104	125	120	80	63	70	233	192	208
EA667_010375|hypothetical_protein	544.903	0.78585	0.120755	6.5078	7.63e-11	1.54e-09	714	626	950	486	531	570	509	486	526	378	351	496
EA667_008365|MoaD/ThiS_family_protein	44.1326	-1.69468	0.260628	-6.50229	7.91e-11	1.6e-09	28	21	32	35	42	31	39	28	28	77	73	90
EA667_006565|hypothetical_protein	139.668	1.14815	0.176867	6.49161	8.49e-11	1.71e-09	231	177	304	125	110	139	120	101	105	92	69	133
TG31307_3_91326_91561	61.6784	-1.38854	0.214198	-6.48249	9.02e-11	1.81e-09	52	36	52	34	44	35	52	42	46	113	112	110
EA667_012145|glutathione-dependent_formaldehyde_dehydrogenase	65.6451	1.41707	0.219079	6.46827	9.91e-11	1.98e-09	123	100	146	50	56	55	41	56	42	37	42	48
EA667_016500|acetate_kinase	2734.8	0.566237	0.0878024	6.44899	1.13e-10	2.24e-09	4037	2735	4022	2689	2838	2639	2658	2362	2584	2410	2171	2079
TG31307_2_1303970_1304057	20.7481	-7.84257	1.21718	-6.44324	1.17e-10	2.32e-09	0	0	1	0	0	0	1	0	0	69	87	73
EA667_008800|DUF2057_domain-containing_protein	54.7078	-1.60553	0.249337	-6.43921	1.2e-10	2.37e-09	44	24	45	39	42	42	39	35	26	121	111	78
TG31307_2_3250057_3250341	143.801	1.35809	0.211273	6.42812	1.29e-10	2.54e-09	190	270	247	120	127	109	116	139	129	78	94	92
EA667_008940|PadR_family_transcriptional_regulator	74.5425	-1.32606	0.206644	-6.41711	1.39e-10	2.72e-09	54	37	79	48	54	65	60	54	51	118	142	125
CP039930_3175298_3175525	462.509	0.781124	0.12191	6.40737	1.48e-10	2.89e-09	661	504	745	439	461	534	404	387	468	349	298	374
EA667_015395|hypothetical_protein	745.696	1.42339	0.222723	6.39083	1.65e-10	3.21e-09	1152	669	1480	772	634	823	861	909	824	321	273	513
EA667_001985|hypothetical_protein	287.796	0.886121	0.139683	6.34379	2.24e-10	4.35e-09	435	352	579	232	231	265	205	255	260	222	203	251
EA667_007665|transaldolase	1174.93	0.757848	0.119559	6.3387	2.32e-10	4.48e-09	1686	1333	2237	952	1087	1250	909	892	1091	970	866	1000
EA667_012415|hypothetical_protein	147.259	1.03058	0.162709	6.33385	2.39e-10	4.6e-09	252	217	307	87	117	130	104	104	108	100	126	124
TG31307_2_193007_193164	124.297	1.25176	0.198499	6.30613	2.86e-10	5.49e-09	219	134	282	89	89	148	103	105	118	79	70	91
EA667_016795|asparaginase	481.389	0.683983	0.108591	6.29868	3e-10	5.74e-09	679	485	848	451	430	467	462	450	457	351	340	450
EA667_017430|serine_hydrolase_family_protein	67.962	1.3339	0.212268	6.28407	3.3e-10	6.28e-09	133	86	150	51	56	56	58	61	47	50	36	47
EA667_005885|hypothetical_protein	311.197	0.836179	0.133313	6.27229	3.56e-10	6.75e-09	414	386	452	290	289	303	328	327	319	207	192	256
EA667_009390|restriction_endonuclease	101.484	-1.13419	0.181199	-6.25936	3.87e-10	7.31e-09	84	49	95	86	79	76	102	107	85	159	126	169
EA667_008425|class_II_fumarate_hydratase	1524.48	-0.671134	0.107284	-6.2557	3.96e-10	7.46e-09	1755	1049	1853	1129	1110	1402	1112	958	1167	2242	2054	2417
TG31307_2_3036251_3036830	357.437	0.997031	0.159558	6.24872	4.14e-10	7.78e-09	414	522	703	295	294	343	347	332	296	218	255	295
EA667_011480|class_I_SAM-dependent_methyltransferase	316.216	0.886922	0.141998	6.24604	4.21e-10	7.88e-09	494	347	421	345	340	367	307	265	328	244	184	202
EA667_018500|AMP-binding_protein	597.417	0.887751	0.142352	6.23633	4.48e-10	8.36e-09	866	560	716	703	603	782	615	598	780	340	346	381
EA667_005935|hypothetical_protein	90.2771	1.25993	0.203005	6.20642	5.42e-10	1.01e-08	113	80	127	109	115	108	122	102	115	43	36	43
EA667_019160|Lrp/AsnC_family_transcriptional_regulator	193.658	0.924195	0.148996	6.20281	5.55e-10	1.03e-08	221	172	275	214	218	225	270	248	214	126	101	94
EA667_019275|[protein-PII]_uridylyltransferase	947.35	0.577762	0.0933948	6.18624	6.16e-10	1.14e-08	1169	856	1307	1050	1116	1101	1064	841	1026	652	704	686
EA667_012330|universal_stress_protein	878.552	0.708715	0.114661	6.18095	6.37e-10	1.17e-08	1299	823	1539	783	726	947	902	863	835	610	600	820
CP039930_1496258_1496478	214.627	0.943115	0.152667	6.1776	6.51e-10	1.19e-08	265	208	299	244	211	197	307	299	229	116	99	155
EA667_008415|sulfurtransferase_complex_subunit_TusD	682.976	-0.638103	0.10361	-6.15872	7.33e-10	1.34e-08	636	521	852	556	488	550	605	542	561	894	872	1098
EA667_003835|outer_membrane_lipoprotein_chaperone_LolA	435.653	0.695447	0.113159	6.14576	7.96e-10	1.45e-08	602	436	715	410	489	488	386	374	425	305	340	342
EA667_005940|methyltransferase	97.2959	1.20471	0.196367	6.13497	8.52e-10	1.55e-08	112	92	144	116	126	112	137	109	112	50	45	43
EA667_007190|acyl-CoA_dehydrogenase	649.211	0.609354	0.099415	6.1294	8.82e-10	1.6e-08	872	544	885	704	713	692	747	655	758	424	475	473
EA667_016000|transcription_termination_factor_Rho	4136.17	-0.42834	0.0701211	-6.10857	1.01e-09	1.81e-08	3818	2951	4341	4233	4355	4131	4571	4025	3821	4454	4733	4530
EA667_009565|NUDIX_hydrolase	105.513	-1.12758	0.18473	-6.10395	1.03e-09	1.86e-08	91	58	107	85	71	94	84	71	90	138	167	204
EA667_008640|S8_family_peptidase	124.373	-0.969579	0.158872	-6.10288	1.04e-09	1.87e-08	118	77	124	93	100	93	114	95	102	174	170	227
CP039930_2127930_2128294	194.58	1.02032	0.167293	6.09897	1.07e-09	1.91e-08	252	123	207	235	268	217	337	261	254	71	97	92
CP039930_2090057_2090173	224.938	1.07139	0.175751	6.09608	1.09e-09	1.94e-08	341	250	276	287	308	202	287	215	199	153	107	123
CP039930_1458277_1458434	84.147	1.37305	0.225959	6.07657	1.23e-09	2.18e-08	150	95	178	61	67	107	64	80	82	45	45	58
EA667_001680|LemA_family_protein	363.971	0.814826	0.134437	6.06102	1.35e-09	2.39e-08	461	317	589	364	369	402	450	433	382	218	181	308
EA667_012050|type_VI_secretion_system_baseplate_subunit_TssE	873.561	-0.532226	0.0879543	-6.05116	1.44e-09	2.54e-08	785	496	847	948	964	939	1066	940	835	887	848	1066
EA667_010805|malate_synthase_G	4229.7	0.487386	0.080615	6.04585	1.49e-09	2.61e-08	5446	4174	6259	4262	4239	4549	4072	3809	4170	3489	3378	3521
EA667_009375|DNA_cytosine_methyltransferase	118.407	-1.12958	0.187744	-6.01663	1.78e-09	3.12e-08	104	60	111	107	116	81	106	80	108	184	140	223
EA667_002250|30S_ribosomal_protein_S3	20121.2	-0.4674	0.0777316	-6.013	1.82e-09	3.18e-08	17268	10849	19495	23827	24357	22559	26966	20375	20366	19918	19772	19737
EA667_017135|MerR_family_transcriptional_regulator	179.444	0.881468	0.146775	6.00559	1.91e-09	3.32e-08	288	199	293	188	151	200	164	166	148	122	122	144
EA667_002215|30S_ribosomal_protein_S10	15920.7	-0.416008	0.0693764	-5.99639	2.02e-09	3.5e-08	13919	10494	16255	17080	18502	16094	19643	16119	15411	16143	16776	16723
EA667_014415|hypothetical_protein	427.324	0.733279	0.122377	5.99198	2.07e-09	3.59e-08	755	560	827	273	278	339	279	326	325	420	349	413
TG31307_6_2687_2814	8.72019	-7.564	1.26527	-5.97815	2.26e-09	3.89e-08	0	0	0	0	0	0	0	0	0	32	33	32
EA667_011490|TetR/AcrR_family_transcriptional_regulator	3354.28	0.511163	0.0856681	5.96678	2.42e-09	4.16e-08	3894	2661	4331	3738	3454	3530	4468	4177	3851	2135	2056	2793
EA667_008990|DUF421_domain-containing_protein	54.3442	-1.39844	0.234445	-5.96488	2.45e-09	4.2e-08	34	31	54	46	47	39	36	31	40	98	91	97
CP039930_75046_75404	111.913	1.37263	0.231836	5.92069	3.21e-09	5.48e-08	90	68	137	147	140	103	254	204	150	30	40	33
TG31307_2_3141619_3142152	99.1208	1.11599	0.188897	5.90795	3.46e-09	5.9e-08	138	122	167	102	115	102	101	100	80	53	53	76
EA667_016200|Re/Si-specific_NAD(P)(+)_transhydrogenase_subunit_alpha	584.133	0.901185	0.152661	5.90319	3.57e-09	6.05e-08	970	591	915	571	689	797	434	392	571	435	422	346
EA667_008465|2-C-methyl-D-erythritol_2,4-cyclodiphosphate_synthase	116.336	-1.02901	0.174814	-5.88631	3.95e-09	6.69e-08	104	67	117	96	108	99	80	77	107	156	179	200
EA667_019315|type_II_asparaginase	985.965	0.650947	0.110828	5.87347	4.27e-09	7.2e-08	1058	650	943	1367	1432	1178	1616	1271	1127	549	451	544
TG31307_2_3365300_3365394	108.7	1.16516	0.198988	5.85541	4.76e-09	8.01e-08	129	107	120	127	138	133	137	152	139	56	45	46
CP039932_7198_7517	40.0546	-1.76507	0.301501	-5.85429	4.79e-09	8.04e-08	36	12	29	21	38	29	17	27	30	87	67	81
EA667_016085|acyl-CoA_synthetase	480.297	0.667548	0.11405	5.85311	4.82e-09	8.07e-08	610	401	728	596	472	474	584	518	515	310	317	366
EA667_010835|DUF1049_domain-containing_protein	1314.23	0.496545	0.0850989	5.83492	5.38e-09	8.97e-08	1761	1295	1974	1244	1324	1442	1247	1180	1238	1104	1047	1112
EA667_018990|hypothetical_protein	128.05	1.01627	0.174231	5.83292	5.45e-09	9.05e-08	174	131	230	124	135	137	118	133	144	69	79	93
EA667_011850|phenylacetate-CoA_oxygenase_subunit_PaaC	4079.02	0.523815	0.089835	5.83086	5.51e-09	9.14e-08	4946	3468	5205	5015	4456	4523	4768	4059	4713	2908	2979	2769
TG31307_2_3656979_3657791	113.985	1.21654	0.209113	5.81765	5.97e-09	9.86e-08	201	153	237	86	66	67	109	151	81	66	62	106
EA667_011425|catalase_HPII	3842.73	0.539667	0.0928013	5.8153	6.05e-09	9.97e-08	5492	3984	6271	3276	3443	4112	3582	3023	3560	3205	3281	3412
CP039930_2368994_2369078	87.2003	1.28189	0.220823	5.80505	6.43e-09	1.06e-07	107	94	169	86	91	89	130	85	84	51	53	34
EA667_002235|50S_ribosomal_protein_L2	19852.6	-0.448528	0.0773375	-5.79962	6.65e-09	1.09e-07	16502	11721	20043	22752	23791	21071	26553	20239	19308	19686	19912	20223
EA667_004660|hypothetical_protein	2320.12	0.452617	0.0782922	5.78112	7.42e-09	1.21e-07	3026	2278	3454	2229	2412	2494	2141	2162	2115	1917	1942	2004
CP039930_2365807_2365861	419.125	0.788341	0.136615	5.77053	7.9e-09	1.29e-07	584	502	778	438	391	364	420	253	371	318	334	338
EA667_008715|alpha/beta_fold_hydrolase	75.7098	-1.28663	0.223084	-5.76745	8.05e-09	1.31e-07	59	33	69	56	61	68	75	70	62	105	88	164
EA746_017625|pyrroloquinoline_quinone_biosynthesis_protein_PqqB	753.158	0.546	0.0948738	5.75501	8.66e-09	1.4e-07	951	787	1122	787	817	815	754	632	681	594	625	582
EA667_008385|helix-turn-helix_transcriptional_regulator	113.133	-1.08462	0.18848	-5.75454	8.69e-09	1.4e-07	88	55	113	86	99	106	115	121	87	146	134	213
CP039930_1848471_1848694	78.9609	-1.22002	0.212281	-5.74719	9.07e-09	1.46e-07	57	50	69	65	65	67	71	42	75	135	126	115
EA667_019585|hypothetical_protein	299.829	-0.72721	0.126723	-5.73856	9.55e-09	1.53e-07	260	187	295	281	283	319	284	264	313	326	370	428
TG31307_2_3249328_3249412	98.4227	1.14059	0.200587	5.68627	1.3e-08	2.08e-07	127	126	168	92	105	113	116	80	95	45	61	71
EA667_009075|YeeE/YedE_family_protein	72.5215	-1.1739	0.207021	-5.67043	1.42e-08	2.27e-07	63	33	69	66	53	53	73	69	54	103	107	127
EA667_001685|TPM_domain-containing_protein	343.278	0.670699	0.118388	5.66525	1.47e-08	2.33e-07	466	277	526	369	362	382	371	381	358	211	245	265
CP039930_2377752_2377863	550.069	0.822297	0.145169	5.66443	1.48e-08	2.34e-07	551	365	817	793	641	706	836	734	508	273	289	316
EA667_011865|phenylacetic_acid_degradation_bifunctional_protein_PaaZ	6580.9	0.443339	0.0784471	5.65144	1.59e-08	2.51e-07	7400	5278	9004	7645	6861	6972	8154	7148	7531	4515	4603	5406
CP039930_1231279_1231477	81.0626	1.19526	0.211509	5.65111	1.59e-08	2.51e-07	134	111	136	73	77	79	59	80	77	57	43	54
EA667_017175|hypothetical_protein	551.716	0.545162	0.0971401	5.61212	2e-08	3.14e-07	766	509	865	538	557	595	550	487	530	413	425	497
EA667_017410|fatty_acid_oxidation_complex_subunit_alpha_FadB	6021.79	-0.382881	0.068456	-5.59309	2.23e-08	3.49e-07	5997	3845	6585	6349	6047	6289	6829	5672	5998	6308	6288	6839
TG31307_3_212821_212961	307.677	-0.876647	0.157286	-5.57359	2.5e-08	3.9e-07	297	250	312	181	235	310	183	186	225	503	481	476
EA667_000990|IMP_dehydrogenase	4039.87	-0.409123	0.0736046	-5.55839	2.72e-08	4.24e-07	3979	2862	4298	4017	4605	4190	4031	3478	3815	4357	4600	4584
CP039930_455091_455148	7512.79	-0.403597	0.072827	-5.54186	2.99e-08	4.65e-07	7013	4910	7378	8191	8822	7777	9428	7400	6938	7810	7601	7952
CP039930_1925985_1926137	57.819	-1.3365	0.24197	-5.5234	3.33e-08	5.15e-07	47	39	44	39	36	55	35	51	32	89	100	115
EA667_003795|multidrug_efflux_RND_transporter_permease_subunit_AdeJ	12887.2	-0.401328	0.0728033	-5.5125	3.54e-08	5.46e-07	11662	7322	12240	15166	15569	14185	17263	13686	12687	12324	12299	12791
CP039931_80713_81297	42.8568	1.61919	0.294775	5.49298	3.95e-08	6.09e-07	66	64	86	46	40	45	33	51	25	23	19	23
EA667_008645|SulP_family_inorganic_anion_transporter	49.8336	-1.48329	0.270363	-5.48629	4.1e-08	6.3e-07	40	12	50	35	43	34	52	51	30	85	75	93
EA667_011840|phenylacetate-CoA_oxygenase/reductase_subunit_PaaK	3778.96	0.654814	0.119551	5.47727	4.32e-08	6.62e-07	4958	3354	4610	4494	4493	4987	3694	3328	4665	2461	2579	2497
TG31307_3_201448_202036	9.79124	-3.66988	0.670955	-5.46964	4.51e-08	6.89e-07	5	1	2	4	2	3	0	2	0	35	30	27
EA667_000505|RTG_family_carbenicillin-hydrolyzing_class_A_beta-lactamase_CARB-16	4052.74	0.377772	0.0691622	5.46212	4.7e-08	7.17e-07	4713	3072	4737	4840	4871	4368	5272	4646	4313	2898	2862	3034
TG31307_2_3240543_3240654	667.862	0.532884	0.0977948	5.44901	5.07e-08	7.69e-07	857	528	865	775	671	699	838	786	743	446	445	525
EA667_017255|ribosome-binding_factor_A	984.215	-0.649178	0.119334	-5.43999	5.33e-08	8.07e-07	701	443	785	1205	1220	985	1636	1363	971	855	887	1002
EA667_008360|GTP_3',8-cyclase_MoaA	129.696	-0.909481	0.167881	-5.41743	6.05e-08	9.13e-07	116	75	106	102	111	130	140	155	112	170	155	186
EA667_008845|DUF1449_family_protein	62.5678	-1.2056	0.223551	-5.39294	6.93e-08	1.04e-06	47	31	67	51	59	52	43	42	53	92	111	99
EA667_001885|superoxide_dismutase_family_protein	629.946	0.574007	0.106539	5.38776	7.13e-08	1.07e-06	876	605	1013	583	671	692	613	506	598	432	524	571
CP039930_1835422_1835497	65.06	-1.1563	0.214635	-5.38727	7.15e-08	1.07e-06	63	37	59	50	46	58	39	51	47	100	108	115
EA667_011855|1,2-phenylacetyl-CoA_epoxidase_subunit_B	1738.6	0.465981	0.0867284	5.37288	7.75e-08	1.16e-06	1860	1362	2242	2157	1949	1813	2291	1988	2027	1097	1164	1352
EA667_008320|ABC_transporter_substrate-binding_protein	45.3759	-1.42653	0.265683	-5.3693	7.9e-08	1.18e-06	34	20	35	41	36	34	52	28	45	68	65	85
EA667_000775|glycoside_hydrolase_family_19	299.575	0.739443	0.137738	5.36848	7.94e-08	1.18e-06	345	309	433	336	341	325	369	329	270	180	166	257
EA667_000355|fumarylacetoacetase	300.872	1.75532	0.327107	5.36618	8.04e-08	1.19e-06	212	155	338	436	421	234	792	635	370	51	59	78
EA667_008795|nitroreductase_family_protein	267.115	-0.696957	0.129918	-5.36458	8.11e-08	1.2e-06	234	218	315	214	208	235	200	200	213	383	385	375
TG31307_2_3620190_3620957	27.3745	2.08878	0.39145	5.33599	9.5e-08	1.4e-06	50	29	42	40	29	28	40	29	26	9	7	10
TG31307_3_188940_189047	64.2677	-1.22882	0.230818	-5.32379	1.02e-07	1.49e-06	44	28	56	58	68	67	62	72	47	73	102	97
CP039930_1807294_1807434	171.569	-0.980159	0.184143	-5.32282	1.02e-07	1.5e-06	136	147	164	112	132	173	98	100	136	267	284	273
EA667_016195|NAD(P)_transhydrogenase_subunit_alpha	157.658	0.94959	0.179074	5.30277	1.14e-07	1.67e-06	252	169	253	151	215	231	115	85	138	107	104	108
EA667_000270|DUF1328_domain-containing_protein	1476.79	0.586178	0.110654	5.2974	1.17e-07	1.71e-06	1691	1515	2524	1350	1378	1498	1449	1601	1454	1067	1120	1311
EA667_014695|EmrA/EmrK_family_multidrug_efflux_transporter_periplasmic_adaptor_subunit	353.571	-0.607665	0.114756	-5.29526	1.19e-07	1.73e-06	301	225	387	360	368	297	414	336	319	429	393	445
EA667_012450|hypothetical_protein	41.9557	1.47158	0.27805	5.2925	1.21e-07	1.75e-06	67	65	104	38	44	33	27	21	33	23	28	27
EA667_002255|50S_ribosomal_protein_L16	15615.6	-0.356669	0.0678726	-5.25497	1.48e-07	2.14e-06	13677	9321	15212	18503	19143	17610	20175	16022	16161	14934	14911	14646
EA667_002525|DUF2789_domain-containing_protein	285.487	0.66543	0.126718	5.25128	1.51e-07	2.18e-06	377	308	475	259	266	292	258	295	266	215	206	250
EA667_012635|O-methyltransferase	208.318	0.686227	0.130846	5.24455	1.57e-07	2.25e-06	277	207	339	187	212	213	238	206	197	158	139	170
EA667_001830|EamA_family_transporter	244.14	0.665701	0.126939	5.24427	1.57e-07	2.25e-06	339	249	397	209	231	262	244	229	244	189	182	196
EA667_018690|phosphomannomutase/phosphoglucomutase	1026.78	0.499851	0.0953886	5.24016	1.6e-07	2.3e-06	1414	940	1460	1061	1304	1205	1063	778	857	834	830	794
EA667_009650|hypothetical_protein	454.06	-0.638147	0.121817	-5.23858	1.62e-07	2.31e-06	484	395	520	340	392	415	263	253	322	657	677	676
EA667_014455|malate_dehydrogenase_(quinone)	1153.18	-0.700668	0.133798	-5.23675	1.63e-07	2.33e-06	1068	481	822	1386	1486	1171	1757	1330	1127	1173	1139	1156
EA667_007620|magnesium-translocating_P-type_ATPase	67.1788	-1.18225	0.225857	-5.2345	1.65e-07	2.35e-06	45	32	66	62	55	69	79	54	52	100	108	85
EA667_010105|aspartate_ammonia-lyase	5341.33	0.483604	0.0925421	5.22578	1.73e-07	2.46e-06	6451	4589	6049	6337	7341	6946	5629	4891	5731	3796	3765	3702
EA667_012680|OmpA_family_protein	419.196	0.604923	0.115813	5.22327	1.76e-07	2.48e-06	597	387	608	407	438	428	418	410	461	343	272	340
EA667_010190|sulfite_exporter_TauE/SafE_family_protein	193.414	0.928626	0.177971	5.21786	1.81e-07	2.55e-06	203	151	200	396	412	377	139	95	155	103	94	70
EA667_018940|peptidylprolyl_isomerase	348.85	-0.596339	0.114314	-5.21667	1.82e-07	2.56e-06	312	202	377	347	326	326	435	359	323	375	381	467
EA667_019145|50S_ribosomal_protein_L34	1827.61	-0.384607	0.0737543	-5.21471	1.84e-07	2.58e-06	1674	1216	1803	1922	2185	2016	2149	1876	1724	1893	1843	1874
EA667_008295|hypothetical_protein	137.769	-0.907357	0.174107	-5.21148	1.87e-07	2.62e-06	106	81	172	111	122	129	111	116	98	205	160	245
EA667_001330|hypothetical_protein	538.802	0.71685	0.137633	5.20841	1.9e-07	2.66e-06	897	611	1055	436	430	568	333	341	449	459	492	463
EA667_017505|DNA-directed_RNA_polymerase_subunit_beta	20817.7	-0.344365	0.0662523	-5.19778	2.02e-07	2.81e-06	20693	13756	21221	22546	24015	22436	24679	19503	19453	21521	21328	21623
EA667_019590|hypothetical_protein	631.83	-0.493346	0.0949347	-5.19669	2.03e-07	2.82e-06	589	427	658	615	646	669	630	603	636	659	696	803
TG31307_2_3231872_3232076	719.276	0.584119	0.112479	5.19313	2.07e-07	2.86e-06	772	669	899	840	770	692	979	920	788	443	431	574
EA667_008470|hypothetical_protein	99.8643	-0.925156	0.178188	-5.19202	2.08e-07	2.87e-06	88	69	96	79	91	84	102	71	73	140	127	175
EA667_001225|class_I_SAM-dependent_methyltransferase	131.109	0.955632	0.184387	5.18274	2.19e-07	3.01e-06	192	135	161	169	178	120	161	137	118	79	81	72
EA667_019340|alpha/beta_hydrolase	157.029	0.882041	0.170211	5.18203	2.19e-07	3.02e-06	208	147	229	153	215	197	149	153	182	93	107	89
CP039930_2839266_2839464	90.6947	1.11315	0.214924	5.17928	2.23e-07	3.05e-06	126	116	133	99	94	82	80	92	113	56	56	49
EA667_019845|hypothetical_protein	281.699	0.669051	0.129364	5.17184	2.32e-07	3.17e-06	322	204	407	333	363	336	364	304	312	149	193	188
TG31307_2_3551645_3552143	170.659	0.742339	0.143715	5.16534	2.4e-07	3.27e-06	241	188	283	147	191	191	164	146	137	126	127	137
EA667_006005|hypothetical_protein	34.983	1.82447	0.353531	5.16069	2.46e-07	3.34e-06	42	40	48	39	40	53	54	37	43	7	15	12
EA667_000005|chromosomal_replication_initiator_protein_DnaA	986.257	-0.398825	0.0772835	-5.16054	2.46e-07	3.34e-06	994	690	1131	957	1001	974	1036	882	878	1049	1142	1192
EA667_011845|phenylacetate-CoA_oxygenase_subunit_PaaJ	2151.69	0.574456	0.111485	5.15277	2.57e-07	3.47e-06	2808	1786	2563	2686	2594	2510	2299	2021	2631	1478	1534	1378
EA667_010225|dihydrolipoyl_dehydrogenase	752.067	0.704148	0.136779	5.14809	2.63e-07	3.55e-06	807	341	737	1048	1139	1164	1186	920	996	285	347	402
EA667_010025|3-hydroxybutyrate_dehydrogenase	119.033	0.99455	0.193868	5.13003	2.9e-07	3.9e-06	185	109	151	145	147	140	126	129	123	91	51	62
CP039930_2375987_2376057	186.815	0.81656	0.160366	5.09185	3.55e-07	4.76e-06	243	165	259	184	276	216	209	191	204	136	104	105
EA667_009655|PAAR_domain-containing_protein	459.698	-0.563887	0.110831	-5.08782	3.62e-07	4.85e-06	496	383	583	332	413	404	302	264	330	622	651	708
CP039930_222802_222985	658.053	0.488442	0.0961396	5.08055	3.76e-07	5.03e-06	766	564	806	775	753	672	785	778	734	440	449	510
CP039930_454528_454779	9286.45	-0.37615	0.0741127	-5.07537	3.87e-07	5.16e-06	8258	6556	9315	10009	10939	9311	10988	9290	8978	9373	9736	9728
EA667_019290|AraC_family_transcriptional_regulator	201.759	0.837477	0.165189	5.06981	3.98e-07	5.3e-06	266	190	266	271	201	256	235	179	232	117	145	108
EA667_009100|acyl-CoA_dehydrogenase	56.3126	-1.21937	0.240746	-5.06495	4.09e-07	5.42e-06	39	32	58	46	27	46	52	43	53	89	96	88
EA667_002960|hypothetical_protein	47.2704	1.40982	0.278461	5.06291	4.13e-07	5.47e-06	56	64	90	42	53	51	52	51	44	18	30	25
EA667_018755|DegT/DnrJ/EryC1/StrS_family_aminotransferase	1013.43	-0.446493	0.0882615	-5.05875	4.22e-07	5.57e-06	1021	642	1030	1077	1132	1009	1182	905	950	1133	1109	1095
EA667_002065|shikimate_dehydrogenase	161.172	-0.869614	0.172068	-5.0539	4.33e-07	5.7e-06	113	104	174	156	131	164	144	146	148	179	197	280
EA667_001825|hemerythrin_domain-containing_protein	427.333	0.599495	0.118689	5.05097	4.4e-07	5.78e-06	585	415	695	391	367	457	415	451	408	324	300	397
CP039930_1818219_1818807	8.85212	-3.3949	0.672959	-5.04474	4.54e-07	5.96e-06	3	1	4	3	3	4	2	3	3	27	20	29
EA667_007185|3-hydroxyacyl-CoA_dehydrogenase	822.475	0.473796	0.0939881	5.04102	4.63e-07	6.06e-06	1012	660	1080	892	845	854	1081	856	977	603	536	667
EA667_009130|winged_helix-turn-helix_transcriptional_regulator	119.035	-0.824669	0.16384	-5.03338	4.82e-07	6.29e-06	107	77	116	90	112	122	108	104	105	163	152	171
EA667_018600|type_VI_secretion_system_tip_protein_VgrG	2257.44	-0.414518	0.0824067	-5.03015	4.9e-07	6.38e-06	2291	1490	2345	2347	2544	2353	2433	1978	2123	2391	2661	2377
CP039930_3015835_3015909	32.7644	-1.57183	0.31298	-5.02214	5.11e-07	6.64e-06	24	16	23	15	29	20	42	21	28	55	62	54
EA667_003875|iron-containing_alcohol_dehydrogenase	2038.84	-0.495965	0.098828	-5.01846	5.21e-07	6.75e-06	1764	1335	2403	1918	1718	2068	2307	2134	1958	2168	2163	2731
CP039930_1740827_1740892	156.376	-0.754149	0.150318	-5.01703	5.25e-07	6.78e-06	145	117	160	131	99	121	159	139	140	199	233	222
EA667_003175|VOC_family_protein	156.168	0.849432	0.169409	5.0141	5.33e-07	6.87e-06	209	151	205	198	152	170	215	157	166	97	74	118
EA667_000360|amino_acid_permease	159.29	0.927264	0.185663	4.99433	5.9e-07	7.6e-06	155	114	174	217	238	163	298	227	175	63	79	71
EA667_007330|hypothetical_protein	204.692	0.753657	0.150953	4.99268	5.95e-07	7.64e-06	266	256	382	178	183	213	157	182	165	169	163	161
EA667_006000|phage_tail_protein	37.7697	1.57173	0.316609	4.96426	6.9e-07	8.83e-06	64	41	50	45	42	51	54	35	35	12	18	18
CP039930_3217526_3217892	109.649	-0.953633	0.192257	-4.96021	7.04e-07	9e-06	91	70	81	87	138	114	118	107	78	142	156	134
CP039930_1839331_1839757	201.907	-0.646948	0.130551	-4.95551	7.21e-07	9.2e-06	206	146	200	172	168	177	201	178	179	263	236	295
EA667_004170|chaperonin_GroEL	3821.51	-0.359996	0.0727343	-4.94947	7.44e-07	9.46e-06	4021	2733	4217	3894	4192	4323	3491	3097	3374	4102	4129	4644
EA667_009835|phage_capsid_protein	158.041	0.725281	0.14683	4.93959	7.83e-07	9.93e-06	222	163	272	132	143	153	162	156	159	129	113	120
EA667_007115|poly-beta-1,6_N-acetyl-D-glucosamine_export_porin_PgaA	40.0687	1.61422	0.326937	4.93742	7.92e-07	1e-05	46	32	72	60	44	60	50	42	48	15	19	10
EA667_002270|50S_ribosomal_protein_L14	12515.3	-0.378703	0.0768598	-4.92719	8.34e-07	1.05e-05	11714	7507	11305	14443	15396	14480	16087	12567	12694	12392	12086	11709
EA667_002245|50S_ribosomal_protein_L22	12969.5	-0.354963	0.0720567	-4.92616	8.39e-07	1.06e-05	11127	8354	12836	14812	15535	14124	17009	13093	13068	12748	12429	12644
EA667_011835|2,3-dehydroadipyl-CoA_hydratase	1942.28	0.599369	0.12202	4.91207	9.01e-07	1.13e-05	2464	1729	2577	2154	2407	2741	1726	1605	2220	1342	1359	1390
EA667_007470|hypothetical_protein	81.4523	1.06121	0.216598	4.89945	9.61e-07	1.21e-05	148	91	205	66	34	46	69	71	75	60	60	71
EA667_013080|NAD(P)/FAD-dependent_oxidoreductase	92.0226	-1.00828	0.206016	-4.89421	9.87e-07	1.24e-05	59	60	96	77	62	59	97	109	83	102	143	152
EA667_008925|YnfA_family_protein	76.966	-1.03495	0.211536	-4.89255	9.95e-07	1.24e-05	66	59	73	49	63	66	59	50	51	129	145	99
TG31307_3_93004_93191	54.8672	-1.20725	0.247514	-4.87751	1.07e-06	1.34e-05	40	37	43	40	40	44	41	47	61	73	79	105
CP039930_1746707_1746884	83.8215	-1.00615	0.206482	-4.87281	1.1e-06	1.37e-05	74	47	86	52	71	68	60	74	91	117	117	144
EA667_016120|polynucleotide_adenylyltransferase_PcnB	812.967	-0.406244	0.0833878	-4.87174	1.11e-06	1.37e-05	772	525	890	879	885	909	907	768	697	848	865	924
TG31307_2_3394426_3394504	284.054	0.640553	0.131681	4.86443	1.15e-06	1.42e-05	378	205	380	312	372	392	306	290	304	182	186	190
CP039930_405134_405228	199.523	0.818374	0.168491	4.85707	1.19e-06	1.47e-05	298	279	339	158	183	181	121	186	167	164	145	175
EA667_014690|DHA2_family_efflux_MFS_transporter_permease_subunit	154.339	-0.722177	0.149543	-4.82924	1.37e-06	1.69e-05	137	101	150	142	175	126	170	141	131	196	183	207
EA667_009505|AraC_family_transcriptional_regulator	46.2714	-1.2715	0.264359	-4.80974	1.51e-06	1.86e-05	36	15	48	49	38	34	46	38	40	65	67	82
EA667_006210|Si-specific_NAD(P)(+)_transhydrogenase	930.334	-0.404184	0.0841242	-4.80461	1.55e-06	1.9e-05	942	614	1017	938	1044	1065	969	818	775	1012	1054	1029
CP039931_32404_33087	179.839	0.76058	0.158546	4.79722	1.61e-06	1.97e-05	208	138	188	259	253	207	247	239	186	94	97	98
EA667_008500|PAS_domain-containing_protein	162.792	-0.827047	0.172411	-4.79694	1.61e-06	1.97e-05	144	110	150	161	139	172	171	120	128	173	194	296
EA667_019810|hypothetical_protein	160.193	0.71662	0.149644	4.78883	1.68e-06	2.04e-05	185	135	228	179	180	191	195	184	184	100	94	110
EA667_008290|MFS_transporter	40.2504	-1.45636	0.304501	-4.78276	1.73e-06	2.1e-05	26	29	18	46	41	32	34	29	32	51	55	84
EA667_006205|lipoyl_synthase	1409.52	-0.368833	0.077209	-4.77707	1.78e-06	2.16e-05	1279	951	1515	1525	1652	1442	1614	1377	1329	1451	1486	1477
CP039930_3533344_3533590	165.341	0.777459	0.16289	4.77292	1.82e-06	2.2e-05	265	172	224	192	165	172	157	145	165	92	127	136
EA667_007590|hypothetical_protein	230.851	0.812741	0.170322	4.77179	1.83e-06	2.2e-05	312	274	551	167	203	238	145	175	161	180	173	234
EA667_019840|hypothetical_protein	167.078	0.772411	0.161934	4.76992	1.84e-06	2.22e-05	209	107	244	194	221	197	216	202	185	84	110	100
EA667_018945|NAD(P)H-dependent_oxidoreductase	312.162	0.646459	0.135544	4.76936	1.85e-06	2.22e-05	444	297	551	290	306	361	257	249	307	262	244	240
EA667_007055|replicative_DNA_helicase	651.861	-0.426437	0.0894991	-4.76471	1.89e-06	2.27e-05	655	475	719	621	700	646	681	540	560	705	777	792
EA667_009040|protocatechuate_3,4-dioxygenase_subunit_beta	30.9332	-1.49155	0.313098	-4.76385	1.9e-06	2.27e-05	27	13	19	19	26	25	29	32	27	48	55	48
EA667_002260|50S_ribosomal_protein_L29	13069.2	-0.361108	0.0758124	-4.76318	1.91e-06	2.28e-05	11600	8446	11822	15291	16293	14843	16134	12875	13901	12687	12664	12258
EA746_019885|acetyltransferase	658.871	-0.44565	0.0936337	-4.75951	1.94e-06	2.31e-05	644	482	696	634	592	632	768	632	591	713	710	858
EA667_017260|translation_initiation_factor_IF-2	9726.85	-0.513352	0.108249	-4.74235	2.11e-06	2.51e-05	7532	4753	9143	11400	11357	9790	15863	12203	9504	8418	8903	10268
EA667_007485|molecular_chaperone	43.6037	1.39097	0.293453	4.74	2.14e-06	2.53e-05	63	73	92	28	39	50	28	37	34	19	32	30
CP039930_459806_459898	9517.74	-0.380973	0.0804883	-4.73327	2.21e-06	2.61e-05	8554	6276	8798	11096	11487	10765	11581	9120	9595	9754	9597	8899
CP039930_2598140_2598622	559.754	3.3862	0.715686	4.7314	2.23e-06	2.63e-05	527	52	1347	785	809	827	992	1012	722	45	47	57
EA667_016780|aspartate-semialdehyde_dehydrogenase	1063.08	-0.435069	0.0919683	-4.73063	2.24e-06	2.64e-05	1108	695	1016	1099	1245	1156	1128	992	953	1174	1206	1097
EA667_011820|3-oxoadipyl-CoA_thiolase	1801.49	0.55292	0.11692	4.72903	2.26e-06	2.65e-05	2482	1524	2218	1961	2338	2531	1752	1449	1901	1293	1331	1247
EA667_015680|adenosine_deaminase	88.6051	1.05165	0.222668	4.72296	2.32e-06	2.73e-05	122	79	162	91	81	98	112	98	92	44	34	81
EA667_010020|AraC_family_transcriptional_regulator	138.747	0.784584	0.166139	4.72245	2.33e-06	2.73e-05	180	119	182	174	162	129	169	170	160	79	88	88
EA667_008775|hypothetical_protein	560.805	-0.632106	0.133963	-4.71851	2.38e-06	2.78e-05	460	339	599	503	441	474	700	768	521	580	571	827
CP039930_211734_212028	143.895	0.945812	0.200519	4.71682	2.4e-06	2.79e-05	193	163	181	187	200	107	172	158	132	94	71	95
EA667_002265|30S_ribosomal_protein_S17	16979.6	-0.363439	0.0771238	-4.71241	2.45e-06	2.85e-05	15253	10488	15912	19859	20980	19204	21740	16773	17533	16989	16380	15534
EA667_018150|DUF2236_domain-containing_protein	54.3588	-1.10949	0.235685	-4.7075	2.51e-06	2.91e-05	43	42	53	33	40	41	31	47	36	82	94	99
EA746_007985|IS3_family_transposase	44.3301	1.42991	0.305463	4.68111	2.85e-06	3.31e-05	58	34	78	43	49	36	69	72	55	11	16	30
EA667_008450|hypothetical_protein	28.2324	-1.51379	0.32345	-4.68015	2.87e-06	3.31e-05	23	20	18	13	16	21	16	24	17	54	48	60
TG31307_2_3496234_3496403	1033.91	-0.378163	0.0810205	-4.66751	3.05e-06	3.52e-05	1006	667	997	1134	1205	1148	1180	1098	946	1001	1049	1124
EA667_019155|YebC/PmpR_family_DNA-binding_transcriptional_regulator	1380.15	0.434071	0.0931469	4.66007	3.16e-06	3.64e-05	1719	1112	1615	1517	1864	1748	1497	1387	1411	1038	1001	968
CP039930_2091583_2091648	314.365	0.714423	0.153377	4.65794	3.19e-06	3.67e-05	418	337	408	321	473	362	276	238	332	207	219	232
EA667_015535|hypothetical_protein	223.175	-0.618993	0.133105	-4.65041	3.31e-06	3.8e-05	186	165	231	226	211	211	256	188	189	250	274	299
EA667_017350|Holliday_junction_resolvase_RuvX	206.943	-0.625751	0.134656	-4.64703	3.37e-06	3.85e-05	174	136	206	194	201	201	221	240	193	233	221	276
EA667_010215|2,3-butanediol_dehydrogenase	447.615	0.57	0.122874	4.63891	3.5e-06	4e-05	517	272	477	572	663	602	540	530	578	248	264	259
CP039930_364871_365017	1667.88	-0.376258	0.0815431	-4.61422	3.95e-06	4.49e-05	1616	992	1673	1910	1897	1767	2067	1715	1622	1667	1727	1642
CP039931_20734_20862	36.1636	1.41851	0.30794	4.60645	4.1e-06	4.66e-05	59	36	54	39	49	48	39	36	35	14	15	22
EA667_017850|nucleotidyltransferase	320.692	-0.598053	0.129855	-4.60554	4.11e-06	4.67e-05	374	273	375	225	258	278	194	177	237	490	472	458
TG31307_2_3252545_3252599	472.287	0.620476	0.134907	4.59928	4.24e-06	4.8e-05	638	589	739	405	404	504	414	345	461	387	399	403
EA667_006770|PIG-L_family_deacetylase	54.7307	1.15851	0.251949	4.59818	4.26e-06	4.81e-05	86	69	111	44	47	59	36	45	59	38	31	40
EA667_003280|toxin	222.506	0.674875	0.147001	4.59096	4.41e-06	4.97e-05	268	166	339	248	244	218	300	246	274	131	123	184
EA667_001860|antibiotic_biosynthesis_monooxygenase	129.722	0.754939	0.164615	4.58609	4.52e-06	5.08e-05	196	141	190	131	138	125	120	109	138	92	95	100
EA667_002230|50S_ribosomal_protein_L23	14045.4	-0.306915	0.0669982	-4.58094	4.63e-06	5.2e-05	12571	9144	15164	15347	16186	14714	17841	14634	13740	13627	13783	14132
CP039930_1971914_1971968	21.1232	-1.73929	0.379908	-4.57818	4.69e-06	5.26e-05	13	12	14	20	15	15	10	18	11	33	46	41
TG31307_3_221840_222064	33.1249	-1.35704	0.296986	-4.56937	4.89e-06	5.47e-05	30	16	25	21	30	24	29	33	21	52	50	64
EA667_006690|filamentous_hemagglutinin_N-terminal_domain-containing_protein	1603	-0.453132	0.0992498	-4.56557	4.98e-06	5.56e-05	1417	743	1292	2095	2221	1869	2248	1803	1692	1436	1378	1453
EA667_018080|YgiQ_family_radical_SAM_protein	1609.33	-0.341559	0.0748479	-4.56337	5.03e-06	5.61e-05	1556	1095	1857	1633	1693	1676	1723	1591	1486	1601	1797	1798
EA667_014260|galactose_mutarotase	288.009	0.667516	0.146555	4.55471	5.25e-06	5.83e-05	381	301	474	266	304	368	228	226	289	216	202	249
EA667_009305|type_1_glutamine_amidotransferase_domain-containing_protein	208.521	0.748352	0.165071	4.5335	5.8e-06	6.43e-05	302	177	410	205	169	183	211	216	214	156	119	200
EA667_015220|MFS_transporter	1567.27	-0.419948	0.0927528	-4.52761	5.97e-06	6.6e-05	1355	1175	1678	1543	1674	1687	1628	1429	1548	1711	1796	1676
CP039930_2581788_2582171	24.0199	1.70244	0.376135	4.52613	6.01e-06	6.64e-05	51	35	53	18	28	23	10	25	11	14	13	12
CP039930_3298003_3298324	1769.17	-0.392754	0.086785	-4.5256	6.02e-06	6.64e-05	1630	1416	1818	1733	1729	1794	1873	1707	1668	1869	1973	2085
EA667_007565|hypothetical_protein	54.0469	1.19044	0.263132	4.52412	6.06e-06	6.67e-05	96	67	104	45	32	52	43	42	68	39	28	40
EA667_008785|hypothetical_protein	255.294	-0.606352	0.134268	-4.51598	6.3e-06	6.92e-05	232	187	329	176	192	228	228	208	242	325	346	366
EA667_019135|membrane_protein_insertion_efficiency_factor_YidD	947.035	-0.40641	0.0900446	-4.51344	6.38e-06	6.99e-05	894	670	914	1017	1167	964	1090	879	851	960	1000	1064
EA667_004685|CysB_family_HTH-type_transcriptional_regulator	179.537	-0.676347	0.149904	-4.51187	6.43e-06	7.03e-05	151	111	157	194	186	220	227	144	169	201	199	214
TG31307_3_48287_48341	24.298	-1.85308	0.411545	-4.50273	6.71e-06	7.32e-05	20	10	16	13	9	14	5	23	22	58	57	35
CP039930_3738989_3739302	158.269	0.711721	0.158458	4.49155	7.07e-06	7.7e-05	192	154	216	162	130	166	205	193	194	92	100	124
EA667_010195|TIGR01244_family_phosphatase	1411.04	0.487122	0.108507	4.48932	7.14e-06	7.77e-05	1450	850	1573	2539	2465	2916	1097	942	1167	778	788	931
TG31307_2_3412140_3412547	58.167	-1.05962	0.236362	-4.48305	7.36e-06	7.98e-05	55	33	34	60	54	53	66	55	53	79	77	78
EA667_009095|LysR_family_transcriptional_regulator	35.3473	-1.31357	0.294212	-4.46471	8.02e-06	8.68e-05	22	25	32	20	27	29	21	32	27	56	67	58
EA667_012055|type_VI_secretion_system_tube_protein_Hcp	10179.3	-0.350298	0.0785907	-4.45724	8.3e-06	8.97e-05	9187	5791	8789	12612	12907	11257	13816	11963	10308	9251	8872	9523
EA667_008420|SDR_family_NAD(P)-dependent_oxidoreductase	1184.37	-0.506545	0.113793	-4.45145	8.53e-06	9.2e-05	1138	953	1724	860	820	985	923	943	904	1526	1504	1910
TG31307_2_3255678_3255819	13.1013	2.36445	0.531468	4.44891	8.63e-06	9.29e-05	28	25	42	7	8	15	4	6	8	3	3	11
EA667_001800|50S_ribosomal_protein_L19	4721.79	-0.367027	0.0825317	-4.4471	8.7e-06	9.35e-05	4323	2793	4412	5386	5829	4901	6465	5387	4533	4494	4410	4639
EA667_003880|hypothetical_protein	1289.47	-0.524609	0.117998	-4.4459	8.75e-06	9.38e-05	1102	811	1411	1268	1076	1304	1573	1426	1285	1311	1200	1860
CP039930_1852556_1852652	25.1304	-1.56845	0.352878	-4.44475	8.8e-06	9.42e-05	20	8	25	13	22	24	16	11	20	39	46	56
TG31307_2_3338320_3339003	187.08	0.722372	0.162561	4.44369	8.84e-06	9.44e-05	248	128	184	261	251	235	256	216	218	114	98	97
EA667_014285|MHS_family_MFS_transporter	77.6627	0.988768	0.222549	4.44292	8.87e-06	9.46e-05	99	59	107	100	82	92	95	117	85	39	43	39
EA667_016390|ribosome_biogenesis_GTPase_Der	1140.01	-0.371462	0.0836627	-4.44	9e-06	9.57e-05	1103	727	1199	1186	1333	1300	1361	1047	1038	1187	1185	1191
EA667_014910|30S_ribosomal_protein_S12	11521.8	-0.327972	0.0739076	-4.4376	9.1e-06	9.66e-05	11401	7167	11385	13008	13795	12697	14263	11294	11046	11289	11680	11205
EA667_010260|GGDEF_domain-containing_protein	97.3993	0.884025	0.199313	4.43536	9.19e-06	9.74e-05	120	61	132	121	112	105	148	127	128	45	47	61
EA667_000500|hypothetical_protein	191.119	0.685281	0.154753	4.42821	9.5e-06	0.000100494	216	175	221	246	261	190	257	225	196	119	121	111
EA667_009080|YeeE/YedE_family_protein	50.829	-1.06463	0.24105	-4.41664	1e-05	0.000105821	42	23	57	42	43	47	42	39	46	70	74	86
TG31307_2_3362760_3363105	62.6044	1.08272	0.246239	4.39704	1.1e-05	0.000115616	85	43	88	85	73	72	80	79	78	23	37	32
CP039930_3800233_3800307	36.3463	-1.35972	0.30951	-4.39312	1.12e-05	0.000117492	20	19	34	24	35	29	41	23	38	54	71	45
EA667_003020|TonB-dependent_receptor	988.503	-0.393509	0.0897585	-4.38409	1.16e-05	0.000122241	955	708	995	974	1058	1040	1136	902	974	1014	1138	1053
EA667_013830|hypothetical_protein	307.172	0.520143	0.11867	4.3831	1.17e-05	0.000122562	349	276	383	337	379	348	362	366	303	218	210	218
EA667_017490|DNA_transfer_protein_p32	80.133	0.869061	0.198549	4.37707	1.2e-05	0.000125761	124	79	133	84	76	85	87	71	74	58	61	48
EA667_001665|glutamate_synthase_large_subunit	2939.79	-0.389597	0.0890704	-4.37404	1.22e-05	0.000127275	2660	1896	3610	2988	2975	2908	3547	2617	2829	3114	3177	3375
CP039930_3236056_3236295	88.1537	0.865495	0.198357	4.36333	1.28e-05	0.000133419	127	84	132	109	91	78	113	96	79	50	56	66
EA667_015390|hypothetical_protein	4259.2	0.426444	0.0979884	4.35199	1.35e-05	0.000140244	5731	3803	6474	4135	4233	4952	3931	3531	4268	3538	3301	3992
EA667_011860|1,2-phenylacetyl-CoA_epoxidase_subunit_A	7690.72	0.496219	0.114129	4.34787	1.37e-05	0.000142631	7653	5069	10593	9380	7994	8483	11115	10176	9436	4286	4397	6216
CP039930_2972000_2972110	277.54	0.640195	0.147522	4.33965	1.43e-05	0.000147793	435	342	541	176	184	259	195	222	219	285	247	240
EA667_011500|methylcrotonoyl-CoA_carboxylase	2706.42	0.473516	0.109189	4.33666	1.45e-05	0.000149531	3623	2231	3389	3161	2868	2999	3064	2406	3229	2050	2088	1920
TG31307_3_196908_197144	62.2814	-1.09262	0.252148	-4.33324	1.47e-05	0.000151587	33	36	69	58	52	63	53	71	44	77	77	115
CP039930_2151048_2151546	143.214	0.758086	0.175166	4.32782	1.51e-05	0.00015507	215	155	219	128	183	163	119	133	110	103	79	139
TG31307_2_3612732_3612797	411.781	0.620671	0.143513	4.32485	1.53e-05	0.000156884	543	439	532	432	458	508	379	314	472	305	296	313
CP039930_1802320_1802672	74.6618	-0.85654	0.198174	-4.32215	1.55e-05	0.000158514	67	47	72	72	68	60	67	68	66	105	90	113
EA667_001790|ribosome_maturation_factor_RimM	9717.03	-0.35904	0.0831724	-4.31682	1.58e-05	0.000162088	9279	6133	9061	10814	11448	10149	13139	10374	9130	9305	9843	9544
EA667_005050|DUF962_domain-containing_protein	173.932	0.676105	0.156913	4.30877	1.64e-05	0.000167782	215	147	307	186	163	146	226	179	189	109	127	142
EA667_009720|SDR_family_NAD(P)-dependent_oxidoreductase	8.68506	-2.96469	0.689789	-4.29797	1.72e-05	0.00017584	4	3	1	6	6	1	9	7	6	24	15	19
EA667_007480|spore_coat_protein_U_domain-containing_protein	156.111	0.75063	0.175303	4.28191	1.85e-05	0.00018868	194	157	284	152	101	153	194	176	152	109	97	138
EA667_011760|hypothetical_protein	30.6206	1.38598	0.323725	4.28136	1.86e-05	0.00018879	54	38	57	37	29	26	29	30	22	23	16	13
EA667_001365|imidazole_glycerol_phosphate_synthase_subunit_HisF	543.57	-0.400426	0.0935515	-4.28028	1.87e-05	0.00018936	545	340	530	574	626	613	611	526	531	558	553	592
EA667_006815|sodium/glutamate_symporter	351.547	-0.485563	0.113509	-4.27776	1.89e-05	0.000191164	360	203	344	370	398	401	380	345	315	345	406	402
EA667_007595|DNA_breaking-rejoining_protein	10.0926	2.55545	0.598016	4.27321	1.93e-05	0.000194743	30	20	27	8	3	8	2	6	6	3	6	3
EA667_004045|carbamoyl-phosphate_synthase_large_subunit	5858.18	-0.34588	0.0811245	-4.26357	2.01e-05	0.000202966	5496	3592	6025	6534	7155	6329	7736	5749	5356	5794	5680	5967
EA667_019130|membrane_protein_insertase_YidC	4131.23	-0.369492	0.0867089	-4.26129	2.03e-05	0.00020467	4099	2712	4163	4366	4925	4427	4853	3874	3798	4463	4513	3929
EA667_004680|hypothetical_protein	11416.6	0.377295	0.0886238	4.25726	2.07e-05	0.000208009	14378	9920	15469	11327	12098	13841	11157	11123	11721	8914	8699	10400
CP039930_2656170_2656276	17.5558	-1.92906	0.45363	-4.2525	2.11e-05	0.000212046	7	5	18	12	20	13	11	8	13	20	46	36
TG31307_2_3350545_3350673	36.0041	1.40558	0.330558	4.25214	2.12e-05	0.000212046	59	35	54	35	33	56	50	29	42	20	11	20
CP039930_3619618_3619704	1373.56	-0.348416	0.0819917	-4.2494	2.14e-05	0.000214267	1254	929	1382	1496	1626	1475	1732	1327	1304	1416	1335	1407
CP039930_69831_70352	135.687	1.406	0.331388	4.24277	2.21e-05	0.000220298	96	99	171	215	177	132	283	254	136	39	32	56
EA667_008955|SGNH/GDSL_hydrolase_family_protein	98.0297	-0.76991	0.181629	-4.23891	2.25e-05	0.000223711	80	72	105	64	86	85	103	94	82	116	132	155
EA667_013970|penicillin-binding_protein_2	329.132	-0.505475	0.119318	-4.23637	2.27e-05	0.000225843	297	215	348	347	428	330	340	278	290	369	390	353
EA667_019330|serine_O-acetyltransferase	387.239	0.483807	0.114597	4.22182	2.42e-05	0.000240488	439	333	497	438	481	434	491	369	421	281	292	257
EA667_007975|hypothetical_protein	68.3498	-0.929511	0.220419	-4.21702	2.48e-05	0.000245225	68	46	73	35	73	49	53	49	44	92	119	114
EA667_010200|MBL_fold_metallo-hydrolase	615.907	0.51556	0.122498	4.20872	2.57e-05	0.000253945	575	373	715	1129	1073	1235	496	477	515	346	284	424
EA667_002790|FAD-dependent_oxidoreductase	311.51	-0.480328	0.114139	-4.20829	2.57e-05	0.00025397	261	203	315	326	345	364	358	304	305	326	341	326
CP039930_2093777_2094014	28.5545	-1.56344	0.371583	-4.20752	2.58e-05	0.000254372	18	10	25	22	48	15	28	23	14	39	50	52
EA667_001795|tRNA_(guanosine(37)-N1)-methyltransferase_TrmD	7415.85	-0.376827	0.0899039	-4.19145	2.77e-05	0.000272592	6995	4401	6913	8311	8858	7657	10520	8146	6961	7047	7384	7200
TG31307_2_3573753_3573910	104.524	0.801196	0.191236	4.18956	2.79e-05	0.000274374	125	102	158	101	115	92	158	133	94	75	64	63
EA667_001595|UDP-N-acetylmuramoyl-L-alanyl-D-glutamate--2,_6-diaminopimelate_ligase	589.341	-0.384506	0.0918101	-4.18806	2.81e-05	0.000275706	576	386	655	586	641	611	658	552	562	579	658	684
EA667_010415|DUF937_domain-containing_protein	845.771	0.375482	0.0897117	4.18544	2.85e-05	0.000278408	994	657	1134	977	940	907	1097	913	794	636	614	701
CP039930_975848_976142	589.655	0.434564	0.103871	4.18367	2.87e-05	0.000280073	631	550	781	594	633	670	672	689	615	431	436	471
EA667_011120|hypothetical_protein	182.719	0.689899	0.165075	4.1793	2.92e-05	0.000285003	194	139	234	229	210	183	317	238	190	100	90	131
EA667_019780|hypothetical_protein	125.67	0.733983	0.175837	4.17422	2.99e-05	0.000290925	134	115	178	128	149	154	151	168	126	76	82	77
EA667_014820|outer_membrane_protein	2746.21	0.386554	0.0927291	4.16864	3.06e-05	0.000297191	3521	2266	4045	2798	2975	3303	2597	2454	2761	2219	2096	2501
EA667_000480|transcriptional_regulator	484.037	-0.496373	0.119076	-4.16855	3.07e-05	0.000297191	361	252	469	601	544	480	676	609	531	400	443	544
EA667_008945|NADPH-dependent_2,4-dienoyl-CoA_reductase	69.487	-0.906696	0.217975	-4.15964	3.19e-05	0.000308483	75	37	68	50	62	45	59	55	75	101	108	96
EA667_010590|hypothetical_protein	243.618	0.621701	0.149521	4.15795	3.21e-05	0.000309862	311	263	443	187	217	249	245	215	228	164	184	258
EA667_019395|LysR_family_transcriptional_regulator	36.9137	1.28894	0.310003	4.15781	3.21e-05	0.000309862	40	42	64	38	47	37	51	36	43	15	17	23
CP039930_3908226_3908497	206.82	0.551057	0.132588	4.15617	3.24e-05	0.000311552	282	167	306	235	231	231	217	194	205	144	157	166
EA667_004785|pyridoxine_5'-phosphate_synthase	443.519	-0.464916	0.111967	-4.15225	3.29e-05	0.000316375	459	295	419	447	539	501	448	382	394	513	508	458
TG31307_2_3607189_3607280	52.3558	1.14005	0.274618	4.15139	3.3e-05	0.00031701	64	65	59	64	75	68	47	61	52	23	31	26
EA667_005165|phosphonate_ABC_transporter_substrate-binding_protein	216.329	-0.654047	0.157745	-4.14622	3.38e-05	0.000323683	214	121	191	259	201	225	259	212	184	274	268	208
EA667_000345|VOC_family_protein	64.6132	1.23024	0.297265	4.13853	3.5e-05	0.000334132	75	35	67	96	94	56	138	114	65	25	21	22
TG31307_2_3374895_3375479	46.9981	1.1658	0.281809	4.13683	3.52e-05	0.00033604	51	54	108	40	55	42	46	49	45	34	26	26
CP039930_1531912_1532012	68.5326	0.853639	0.206499	4.13387	3.57e-05	0.000339795	105	78	130	66	56	67	58	60	56	51	50	57
EA667_008345|nitrate_reductase	49.3523	-1.16762	0.28256	-4.1323	3.59e-05	0.000341543	35	33	49	40	36	35	69	26	25	82	65	95
EA667_017225|monovalent_cation/H+_antiporter_subunit_A	1126.63	-0.344026	0.0834501	-4.12253	3.75e-05	0.000355735	1256	755	1243	1110	1204	1184	1213	957	983	1217	1256	1278
EA667_018595|hypothetical_protein	571.464	-0.391107	0.0950977	-4.11268	3.91e-05	0.000370244	591	397	597	587	655	563	602	500	522	632	643	623
EA667_009890|hypothetical_protein	2527.66	0.446707	0.108621	4.11252	3.91e-05	0.000370244	3138	2970	4462	1931	2045	2307	2210	2261	2001	2104	2365	2698
EA667_011370|N-acetyltransferase	195.381	0.578089	0.140924	4.10214	4.09e-05	0.000386577	239	203	289	201	174	198	218	216	184	141	159	150
EA667_006605|amidophosphoribosyltransferase	1751.69	-0.318365	0.0777123	-4.09672	4.19e-05	0.000395062	1754	1335	2095	1644	1817	1858	1670	1500	1567	1974	1926	2010
EA667_008860|TonB-dependent_siderophore_receptor	376.025	-1.08569	0.26511	-4.09526	4.22e-05	0.000396878	395	152	223	390	471	369	449	362	266	544	487	439
CP039930_1074487_1074762	344.901	0.509022	0.124419	4.09118	4.29e-05	0.000403234	423	242	455	389	344	395	461	417	401	207	220	286
EA667_007040|transglutaminase_family_protein	323.328	0.497823	0.121718	4.08997	4.31e-05	0.000404648	415	263	427	349	334	403	400	329	327	226	209	279
EA667_015295|hypothetical_protein	525.487	0.484608	0.118598	4.08615	4.39e-05	0.000410369	596	413	571	708	590	588	782	594	563	323	373	340
EA667_011815|phenylacetate--CoA_ligase	1559.56	0.46102	0.112832	4.08591	4.39e-05	0.000410369	2200	1257	1811	1745	1912	1831	1591	1473	1733	1101	1266	1120
CP039930_2582765_2583344	299.258	1.21592	0.297672	4.08477	4.41e-05	0.000411693	325	288	704	302	281	323	385	398	196	148	174	184
CP039930_58423_58594	86.4221	0.800803	0.196218	4.08119	4.48e-05	0.000417327	117	99	142	95	77	99	78	79	75	52	67	70
EA667_004225|transporter_substrate-binding_domain-containing_protein	287.364	-0.51457	0.126095	-4.08082	4.49e-05	0.000417327	268	227	327	279	288	251	256	225	248	345	397	335
EA667_017465|DUF1311_domain-containing_protein	362.154	0.503019	0.123322	4.07889	4.53e-05	0.000420086	436	354	536	296	383	384	415	338	404	283	262	314
CP039930_508262_508721	29501.7	-0.280924	0.0689361	-4.07513	4.6e-05	0.000425999	28407	20925	27965	33425	34392	32609	33756	30090	29472	27797	28979	29912
EA667_009115|SDR_family_oxidoreductase	43.6885	-1.03768	0.254654	-4.07485	4.6e-05	0.000425999	38	24	49	24	39	30	41	36	35	67	74	65
CP039930_1927064_1927251	56.0735	-1.12975	0.277885	-4.06554	4.79e-05	0.000442626	46	33	60	45	39	56	21	33	56	71	97	109
EA667_000185|molecular_chaperone_DnaJ	1336.12	-0.406106	0.100004	-4.0609	4.89e-05	0.000450761	1267	826	1525	1342	1357	1479	1483	1332	1276	1235	1347	1771
CP039930_1831208_1831315	54.7556	-0.97929	0.241551	-4.05417	5.03e-05	0.000463139	47	36	42	57	67	42	42	44	50	73	78	76
CP039930_1741900_1742014	213.526	-0.525557	0.130163	-4.03769	5.4e-05	0.000496069	256	164	251	166	167	201	157	152	160	272	298	312
EA667_009210|3-oxoadipyl-CoA_thiolase	28.1361	-1.32715	0.328944	-4.03457	5.47e-05	0.000501861	16	15	34	16	26	18	26	16	21	42	45	61
EA667_009910|pyrroloquinoline-quinone_synthase_PqqC	624.621	0.432044	0.107241	4.02871	5.61e-05	0.000513672	823	664	893	613	630	679	546	500	578	546	557	523
CP039930_3402459_3403221	770.187	0.428666	0.106436	4.02747	5.64e-05	0.000515535	1064	781	1002	780	801	825	720	660	740	711	605	635
EA667_017735|homoserine_dehydrogenase	1027.4	-0.349864	0.0869338	-4.02449	5.71e-05	0.000521229	1123	634	1090	1091	1185	1128	1106	903	941	1060	1068	1160
TG31307_2_274057_274202	1056.84	-0.346454	0.0861597	-4.02107	5.79e-05	0.000527984	1024	677	1031	1139	1267	1149	1212	1149	1018	1008	1123	1038
CP039930_3163404_3163549	53.6325	0.99577	0.248742	4.00322	6.25e-05	0.0005685	64	63	80	58	49	52	62	63	64	30	32	34
EA667_007365|tRNA_(adenosine(37)-N6)-dimethylallyltransferase_MiaA	926.35	0.393363	0.0984158	3.99695	6.42e-05	0.000582813	1030	898	1389	864	957	870	1083	961	888	817	683	819
CP039930_171649_172104	172.08	0.779739	0.195544	3.98754	6.68e-05	0.000605398	186	187	439	160	147	129	167	138	130	137	144	143
EA667_015665|acyl-CoA_dehydrogenase	291.265	0.570421	0.143114	3.98579	6.73e-05	0.000608863	270	205	385	338	297	286	510	424	349	144	182	200
EA667_018865|YciK_family_oxidoreductase	404.689	0.478058	0.119986	3.98429	6.77e-05	0.000610827	527	306	590	388	422	479	451	428	446	331	280	310
EA667_005275|50S_ribosomal_protein_L31	2364.59	-0.316403	0.0794136	-3.98424	6.77e-05	0.000610827	2238	1497	2444	2518	2715	2489	3109	2611	2166	2256	2319	2430
EA667_012060|type_VI_secretion_system_contractile_sheath_large_subunit	7177.54	-0.335851	0.0843301	-3.98257	6.82e-05	0.000613195	6885	4455	6284	8319	8937	7587	9457	7927	7148	6943	6690	6737
EA667_006965|hypothetical_protein	1308.62	0.48782	0.12249	3.98254	6.82e-05	0.000613195	1664	1330	2134	1226	1049	1225	1239	1389	1263	961	971	1432
EA667_016075|translation_initiation_factor_IF-3	2876.52	-0.318325	0.0800054	-3.97879	6.93e-05	0.000621783	2675	1864	3176	2972	3359	2846	3624	3102	2633	2816	2908	3019
EA667_012065|type_VI_secretion_system_contractile_sheath_small_subunit	2674.91	-0.290302	0.0729686	-3.97845	6.94e-05	0.000621783	2674	1874	2723	2837	3094	2907	3089	2558	2542	2727	2750	2665
EA667_004595|tol-pal_system-associated_acyl-CoA_thioesterase	727.134	0.359483	0.0903838	3.9773	6.97e-05	0.000623796	839	563	889	914	906	807	870	769	717	492	537	602
EA667_013425|BON_domain-containing_protein	902.642	0.433411	0.109002	3.97618	7e-05	0.000625713	1250	925	1448	726	948	928	714	720	824	788	818	847
EA667_002600|DUF1446_domain-containing_protein	93.7922	0.773587	0.194591	3.97546	7.02e-05	0.000626575	123	82	148	90	100	112	101	112	94	71	63	53
TG31307_2_3586952_3587205	137.039	0.744413	0.187348	3.97342	7.08e-05	0.00063095	166	123	135	250	232	250	105	84	103	97	70	67
TG31307_3_210767_210874	81.1949	-0.837787	0.211063	-3.96938	7.21e-05	0.0006407	81	51	103	56	43	82	59	52	63	120	136	123
EA667_001690|hypothetical_protein	129.204	0.626051	0.15776	3.96837	7.24e-05	0.00064237	206	125	201	125	122	140	126	119	98	103	99	112
TG31307_5_1875_1930	2.67278	-5.81413	1.46561	-3.96704	7.28e-05	NA	0	0	0	0	0	0	0	1	0	12	5	12
EA667_014900|elongation_factor_G	42549.7	-0.32963	0.0831105	-3.96616	7.3e-05	0.000647295	41604	25576	39590	50224	53237	46338	56057	43028	41012	41387	40507	40170
EA667_011450|hypothetical_protein	63.7268	0.935162	0.235998	3.96258	7.41e-05	0.000656021	87	80	108	48	63	68	59	52	74	35	45	53
EA667_019235|DUF962_domain-containing_protein	141.896	0.724136	0.18284	3.9605	7.48e-05	0.000660694	150	121	160	177	137	168	238	202	148	66	78	97
EA667_006765|acyl-CoA_dehydrogenase	53.7486	1.02061	0.257957	3.9565	7.61e-05	0.000670775	84	56	113	37	46	69	49	47	46	28	36	49
CP039930_2052956_2053122	32.4491	1.3371	0.338173	3.95389	7.69e-05	0.000677032	46	48	55	18	26	44	35	29	36	15	20	20
CP039930_3955755_3955927	154.251	0.675696	0.171383	3.9426	8.06e-05	0.000708583	223	149	217	141	148	171	145	155	189	122	89	127
CP039930_3080590_3080749	7044.83	-0.26388	0.066952	-3.94134	8.1e-05	0.000711177	7159	4705	7004	7801	8307	7829	8119	7045	6928	6908	6914	6874
EA667_009715|SDR_family_NAD(P)-dependent_oxidoreductase	21.5928	-1.41399	0.358798	-3.94091	8.12e-05	0.000711294	19	11	22	10	12	7	13	18	17	41	32	53
EA667_009615|HD_domain-containing_protein	33.1831	-1.1256	0.285692	-3.9399	8.15e-05	0.00071317	38	21	28	22	23	23	20	23	21	49	57	68
TG31307_2_119429_119529	85.995	0.770829	0.195756	3.9377	8.23e-05	0.000717351	114	112	159	83	84	76	64	77	62	73	62	73
CP039930_1853330_1853957	32.0562	-1.23489	0.313612	-3.93766	8.23e-05	0.000717351	29	21	23	23	23	35	23	16	28	54	41	64
CP039931_50878_50988	15.5292	2.10725	0.535196	3.93735	8.24e-05	0.000717351	24	19	22	19	22	22	11	13	24	3	4	7
CP039930_3337600_3337838	91.8596	0.844909	0.214868	3.93223	8.42e-05	0.000731623	159	92	127	92	124	95	77	65	97	77	60	55
EA667_000955|pyruvate_dehydrogenase_(acetyl-transferring),_homodimeric_type	5082.63	0.288352	0.0734936	3.9235	8.73e-05	0.000757476	6525	4006	6537	5555	6020	5637	5475	4619	4992	4292	4144	4250
EA667_009280|alpha/beta_hydrolase	329.333	-0.495992	0.126654	-3.91613	9e-05	0.000779757	348	223	378	273	288	341	316	281	306	355	367	499
EA667_018760|N-acetyltransferase	1101.33	-0.409635	0.104708	-3.91215	9.15e-05	0.000791465	1212	702	1047	1125	1298	1152	1216	932	1081	1268	1158	1154
CP039930_2129281_2129438	87.1528	0.837881	0.214258	3.91062	9.21e-05	0.000795224	110	82	126	80	104	77	131	125	72	48	52	63
TG31307_3_247314_247509	13.0049	-1.91325	0.489389	-3.90947	9.25e-05	0.000797763	6	4	10	14	13	12	9	11	8	21	26	21
EA667_017730|DsbC_family_protein	457.428	0.383009	0.0979809	3.90902	9.27e-05	0.000797994	564	415	657	450	499	488	473	468	409	373	376	397
EA667_019735|DUF2829_domain-containing_protein	130.761	0.626167	0.160497	3.90142	9.56e-05	0.000822171	163	110	168	163	157	154	158	140	129	91	80	90
EA667_001485|energy-dependent_translational_throttle_protein_EttA	3914.37	-0.301075	0.0771905	-3.90041	9.6e-05	0.000824303	3982	2590	4089	4299	4681	4221	4461	3573	3703	4025	4107	3815
EA667_009055|3-dehydroshikimate_dehydratase	28.1635	-1.26959	0.325646	-3.89869	9.67e-05	0.000828901	32	12	19	22	21	22	31	18	22	41	46	51
EA667_003805|phosphatase_PAP2_family_protein	1871.67	-0.299951	0.0769445	-3.89828	9.69e-05	0.000829003	1766	1228	1834	2062	2132	1903	2467	2084	1845	1712	1794	1938
EA667_009880|uracil-DNA_glycosylase_family_protein	145.146	0.632065	0.162205	3.89671	9.75e-05	0.000833072	177	179	244	137	131	160	132	116	120	113	118	127
CP039930_3079941_3080119	7598.95	-0.269935	0.0692872	-3.89588	9.78e-05	0.000834628	7417	4981	7914	8592	9321	8120	9129	7531	7160	7507	7405	7391
EA667_002330|30S_ribosomal_protein_S13	11020.3	-0.295811	0.075966	-3.894	9.86e-05	0.000839845	10501	6939	10662	13244	13608	12265	13642	10905	10980	10734	10653	10046
EA667_001875|MFS_transporter	106.405	-0.743526	0.190966	-3.89351	9.88e-05	0.000840231	77	47	101	113	122	94	170	128	107	101	106	134
EA667_004150|diacylglycerol_kinase	83.5501	0.830566	0.213369	3.89262	9.92e-05	0.000842005	97	105	148	81	78	80	107	62	75	51	63	68
EA667_018850|thiol:disulfide_interchange_protein_DsbA/DsbL	871.94	0.347439	0.0892953	3.8909	9.99e-05	0.00084667	1148	682	1226	965	976	1016	873	804	799	667	751	755
EA667_010635|hypothetical_protein	123.562	0.719355	0.185049	3.88737	0.000101337	0.000857761	150	105	246	124	130	132	116	129	114	101	76	96
EA667_001785|30S_ribosomal_protein_S16	3411.57	-0.317779	0.0817683	-3.88633	0.000101771	0.000860095	3347	2097	3567	3793	4031	3497	4358	3517	3172	3387	3447	3339
EA667_019250|hypothetical_protein	176.171	0.618287	0.159261	3.88221	0.00010351	0.000873443	197	162	256	183	257	236	162	181	155	119	133	114
EA667_002645|30S_ribosomal_protein_S9	4202.16	-0.332055	0.0855474	-3.88153	0.000103802	0.000874556	4234	2702	4284	4638	4889	4072	5333	4328	3762	4287	4283	4280
EA667_003830|50S_ribosomal_protein_L27	3138.9	-0.3169	0.0817889	-3.87461	0.000106797	0.000898409	3067	1879	2996	3662	3891	3353	4081	3282	3067	2876	3079	3039
EA667_019745|hypothetical_protein	108.927	0.686577	0.177382	3.87061	0.000108562	0.000911854	138	91	141	131	110	114	140	130	129	64	69	77
EA667_007730|lactonase_family_protein	359.757	0.469077	0.121516	3.8602	0.000113293	0.000950129	477	314	478	399	373	451	381	301	377	280	274	283
EA667_008260|IS5_family_transposase	22.3712	-1.4116	0.365838	-3.85853	0.000114071	0.000954404	10	15	29	10	15	12	12	15	14	35	49	47
EA667_019545|LysR_family_transcriptional_regulator	17.4497	1.85595	0.48102	3.85836	0.000114151	0.000954404	20	19	41	14	30	22	17	22	12	6	6	8
EA667_013280|FAD-binding_oxidoreductase	118.32	-0.671358	0.174152	-3.85501	0.000115725	0.000966083	104	76	91	131	134	144	118	112	120	111	139	148
EA667_008720|hypothetical_protein	48.25	-0.981477	0.254691	-3.85359	0.000116398	0.000970219	37	35	49	39	30	29	47	57	31	72	65	83
EA667_004920|hypothetical_protein	286.023	0.50743	0.131807	3.84979	0.000118217	0.000983882	356	246	414	322	272	319	335	294	288	189	189	275
EA667_000045|RND_transporter	1821.57	0.316083	0.082213	3.84469	0.000120706	0.00100307	1856	1297	2086	2239	2037	1978	2530	2341	2115	1221	1168	1457
EA667_005680|DNA_mismatch_repair_protein_MutS	372.644	-0.399841	0.104164	-3.83857	0.000123755	0.00102684	367	254	436	370	392	398	351	345	327	403	404	463
EA667_002275|50S_ribosomal_protein_L24	18810.1	-0.294326	0.076725	-3.83611	0.000124998	0.00103559	18102	12187	17405	21846	23398	21386	23596	18575	18809	18111	18083	17365
EA667_009050|type_I_3-dehydroquinate_dehydratase	22.0391	-1.42544	0.372364	-3.82809	0.000129141	0.00106829	21	12	13	20	18	12	18	15	18	39	45	29
EA667_017810|DNA_modification_methylase	638.751	-0.383019	0.100183	-3.82319	0.000131735	0.00108811	606	425	788	598	612	663	708	627	566	636	710	807
TG31307_3_211661_211876	110.752	-0.70925	0.185557	-3.82228	0.000132226	0.00108971	92	76	103	104	81	92	127	143	104	122	117	170
CP039930_1772746_1772941	11.7655	-2.24388	0.587083	-3.82209	0.000132328	0.00108971	4	1	7	18	12	15	14	10	11	19	11	21
EA667_004480|AI-2E_family_transporter	927.987	0.317573	0.0831177	3.82077	0.000133036	0.0010939	1073	762	1219	1028	1057	970	1060	916	999	713	720	805
EA667_019750|hypothetical_protein	61.1357	0.895161	0.23554	3.80047	0.000144423	0.00118574	73	58	95	65	79	65	76	53	75	35	36	40
TG31307_2_3651258_3651424	33.7646	1.21378	0.319456	3.79952	0.000144977	0.00118851	51	45	60	23	20	39	47	26	37	23	19	20
EA667_006100|type_I_glutamate--ammonia_ligase	2963.49	-0.256199	0.0674712	-3.79716	0.000146361	0.00119806	2840	1962	3275	3189	3368	3355	3503	2863	2920	2822	2951	3002
CP039930_2925149_2925686	90.5091	0.760303	0.200553	3.79103	0.000150026	0.00122622	124	80	124	96	93	76	106	115	115	64	44	69
EA667_007370|RNA_chaperone_Hfq	885.93	-0.363057	0.0957847	-3.79034	0.000150442	0.00122656	896	620	885	848	1052	844	1033	856	862	947	845	1044
EA667_000740|pyridoxal_phosphate-dependent_aminotransferase	214.508	0.52437	0.138348	3.79022	0.000150516	0.00122656	301	201	359	201	197	226	205	163	217	176	183	184
CP039930_3548926_3549097	236.161	0.526109	0.138954	3.7862	0.000152968	0.00124468	320	231	383	223	208	285	214	201	217	176	193	223
TG31307_2_3242349_3242419	207.449	0.642037	0.169882	3.77932	0.000157259	0.00127733	266	235	236	196	254	221	231	195	232	161	158	122
EA667_014905|30S_ribosomal_protein_S7	12322.8	-0.25834	0.0683644	-3.77887	0.000157543	0.00127733	12192	7861	12918	13878	14757	13390	15039	12318	11908	11998	12031	11772
EA667_012745|M48_family_metallopeptidase	575.681	0.390733	0.103413	3.77838	0.000157853	0.00127733	745	491	897	562	565	645	580	501	563	494	490	488
EA667_007335|rRNA_pseudouridine_synthase	314.39	0.496696	0.131461	3.77828	0.000157914	0.00127733	376	339	526	260	305	338	289	279	290	279	268	259
CP039930_1798191_1798415	21.9085	-1.30474	0.345416	-3.7773	0.00015854	0.0012805	19	14	20	13	12	14	13	17	16	41	35	44
TG31307_2_3020973_3021455	832.625	0.477351	0.126647	3.76916	0.000163799	0.00132102	867	780	1326	830	810	886	954	1005	743	562	610	786
EA667_002335|30S_ribosomal_protein_S11	11642.4	-0.298802	0.0794155	-3.76252	0.000168212	0.00135462	11225	7064	11087	13956	14520	12914	14905	11624	11768	11246	11037	10569
EA667_002480|DUF3108_domain-containing_protein	547.343	0.382283	0.101811	3.75482	0.000173463	0.00139485	666	537	806	550	555	586	494	536	494	462	464	488
EA667_010100|hypothetical_protein	99.4627	0.785636	0.209353	3.75268	0.000174955	0.00140478	119	103	93	127	161	141	113	98	88	49	64	58
EA667_008750|hypothetical_protein	42.9156	-1.05663	0.281679	-3.75119	0.000175994	0.00141105	47	29	28	38	40	34	40	24	31	63	49	89
EA667_016220|tRNA_dihydrouridine(20/20a)_synthase_DusA	370.468	-0.435942	0.116286	-3.74888	0.000177625	0.00142204	390	262	382	331	425	401	378	307	319	417	456	405
CP039930_1469979_1470163	1551.37	-0.357813	0.0954685	-3.74796	0.000178276	0.00142448	1509	801	1351	1866	1937	1764	2146	1759	1598	1387	1414	1442
EA667_001510|efflux_RND_transporter_periplasmic_adaptor_subunit	43.5209	1.11611	0.297811	3.74772	0.000178451	0.00142448	53	31	57	58	59	53	63	68	39	22	16	21
EA667_003800|multidrug_efflux_RND_transporter_periplasmic_adaptor_subunit_AdeI	5951.57	-0.260699	0.0695723	-3.74717	0.000178842	0.00142552	5902	4051	5937	6706	6909	6365	7353	5901	5774	5826	5719	5887
CP039930_2971301_2971799	137.061	0.606685	0.162325	3.73746	0.000185887	0.00147952	229	174	255	85	108	113	116	88	89	146	100	151
CP039930_1361631_1362005	1156	-0.32489	0.0870083	-3.73401	0.000188452	0.00149776	1035	723	1180	1115	1265	1196	1556	1446	1194	999	1146	1212
EA667_009725|alpha/beta_hydrolase	13.4092	-1.79135	0.480599	-3.72734	0.000193512	0.00153574	11	2	12	9	5	10	10	13	11	20	26	31
EA667_016245|aconitate_hydratase_AcnA	1843.18	0.380055	0.102087	3.72285	0.00019699	0.00156108	2632	1603	2900	1779	1798	2042	1585	1404	1753	1551	1626	1780
EA667_002835|protein_translocase_subunit_SecD	1411.82	-0.3345	0.0898932	-3.72108	0.000198373	0.00156976	1348	808	1330	1610	1797	1562	1919	1491	1385	1277	1364	1349
EA667_005170|phosphate_ABC_transporter_permease_subunit_PstC	156.485	-0.612653	0.164841	-3.71664	0.000201891	0.00159529	150	79	151	168	198	174	208	125	130	183	164	178
CP039930_2477443_2477976	82.891	0.882378	0.237509	3.71513	0.000203096	0.0016025	104	89	141	72	86	95	113	93	57	36	50	81
EA667_009035|4-carboxymuconolactone_decarboxylase	27.9984	-1.27592	0.343908	-3.71005	0.000207216	0.00163265	21	14	24	17	30	22	25	17	34	53	33	44
EA667_007490|fimbrial_biogenesis_outer_membrane_usher_protein	54.6985	0.862633	0.232632	3.70815	0.000208781	0.00164261	85	67	108	38	48	53	49	41	45	41	35	55
CP039930_249335_249437	68.1295	1.03256	0.278555	3.70684	0.00020986	0.00164873	62	47	122	99	91	77	112	93	47	31	32	38
TG31307_4_31475_31537	157.697	0.584299	0.157726	3.70453	0.000211783	0.00166145	198	101	201	181	200	187	195	190	190	92	103	106
CP039931_62591_62662	78.75	0.805223	0.217462	3.70281	0.000213223	0.00167035	82	75	114	84	102	81	118	93	75	54	46	42
EA667_009415|GntR_family_transcriptional_regulator	89.8926	-0.70199	0.189833	-3.69794	0.00021736	0.00170032	95	68	88	75	67	80	76	86	63	103	129	144
EA667_004545|hypothetical_protein	942.57	0.307242	0.083093	3.69757	0.000217672	0.00170033	1153	782	1293	1021	959	977	1030	998	901	759	744	875
EA667_009045|protocatechuate_3,4-dioxygenase_subunit_alpha	40.5049	-1.08848	0.294494	-3.6961	0.000218936	0.00170776	44	19	22	43	33	34	54	41	32	61	52	52
CP039931_21252_21354	17.9102	1.8509	0.500872	3.69536	0.000219576	0.00171032	28	22	38	19	14	22	14	19	21	4	17	1
TG31307_3_271332_271453	26.6295	-1.23054	0.333039	-3.69487	0.000219999	0.00171117	15	15	33	23	19	25	23	12	19	43	42	49
EA667_004635|enoyl-CoA_hydratase	667.47	-0.4339	0.117732	-3.68549	0.000228266	0.00177295	564	382	717	688	718	716	899	773	644	570	616	856
EA667_009240|LysR_family_transcriptional_regulator	104.108	-0.627845	0.170625	-3.67967	0.000233534	0.00181129	94	68	125	102	91	88	105	86	92	128	135	140
EA667_019230|redox-regulated_ATPase_YchF	1681.1	0.305142	0.0829511	3.67858	0.000234537	0.0018165	1995	1405	1999	1974	2132	1937	1854	1508	1688	1364	1322	1321
CP039930_164525_164714	780.371	0.34223	0.093059	3.67756	0.000235479	0.00182005	894	616	995	898	893	956	835	815	830	553	565	687
EA667_004980|NADP-dependent_isocitrate_dehydrogenase	6337.59	-0.285274	0.0775757	-3.67736	0.000235661	0.00182005	6495	4028	6488	7378	7527	6784	7665	6042	5909	6276	6369	6179
TG31307_2_3658157_3658234	21.1813	1.46377	0.398606	3.67222	0.000240454	0.00185445	32	32	43	14	16	22	15	21	25	12	7	17
TG31307_2_3028589_3029107	35.5367	-1.17798	0.321606	-3.66282	0.000249452	0.00192113	25	18	20	32	28	22	68	48	36	35	57	39
EA667_005890|hypothetical_protein	1904.05	0.477346	0.130505	3.65769	0.0002545	0.00195725	1801	1397	2312	2085	1849	1996	3031	3072	2205	1022	1001	1614
EA667_001455|HAMP_domain-containing_protein	763.542	0.308367	0.0843406	3.65621	0.000255974	0.00196582	922	633	1109	771	809	788	862	729	739	619	639	697
EA667_000265|dienelactone_hydrolase_family_protein	564.772	0.390855	0.106946	3.6547	0.000257484	0.00197464	715	503	826	543	605	657	530	503	572	479	474	466
EA667_017415|acetyl-CoA_C-acyltransferase_FadA	1579.34	-0.350602	0.095951	-3.65397	0.000258216	0.00197748	1688	933	1775	1721	1761	1615	1762	1353	1562	1713	1672	1653
CP039930_1770411_1770464	26.1591	-1.20035	0.328757	-3.65118	0.00026104	0.00199631	18	19	23	18	14	21	28	19	22	45	44	38
EA667_009290|hypothetical_protein	61.7021	-0.816352	0.22371	-3.64915	0.000263111	0.00200935	62	36	60	47	55	59	57	50	62	74	74	106
EA667_016050|50S_ribosomal_protein_L35	7482.96	-0.271722	0.0745173	-3.64643	0.000265905	0.00202785	6641	4420	7549	8932	9215	7827	10001	8725	7678	6659	6783	6943
CP039930_83229_83382	110.469	-0.652855	0.179184	-3.64349	0.000268966	0.00204833	109	68	94	141	108	114	100	111	97	123	132	135
EA667_018320|glutathione_S-transferase	242.655	0.469975	0.129059	3.64154	0.000271014	0.00206107	331	254	376	241	234	220	206	216	223	215	222	198
EA667_003220|translational_GTPase_TypA	5738.39	-0.323966	0.0890772	-3.63691	0.000275924	0.00209549	5714	4040	5771	6282	6940	6065	6461	5119	5341	6250	6151	5388
EA667_000280|PQQ-dependent_sugar_dehydrogenase	121.303	0.666418	0.183697	3.6278	0.000285844	0.00216781	173	134	233	110	113	97	101	86	117	76	101	134
EA667_016885|Zn-dependent_hydrolase	200.283	0.516023	0.142323	3.62573	0.000288145	0.00217943	264	210	317	196	188	196	174	170	205	157	154	197
TG31307_3_250438_250754	49.3484	-0.853706	0.235459	-3.62571	0.000288173	0.00217943	50	34	53	41	42	44	34	40	25	80	68	78
EA667_018525|amino_acid_permease	696.239	0.765817	0.211368	3.62314	0.00029105	0.00219815	1136	597	810	803	830	914	722	558	789	482	500	377
EA667_018075|DUF2726_domain-containing_protein	103.482	0.722784	0.199895	3.61581	0.000299409	0.00225816	111	79	146	100	82	126	161	150	132	66	49	70
EA667_007070|30S_ribosomal_protein_S6	18162.4	-0.25489	0.070576	-3.61156	0.000304359	0.00229233	16860	10667	17081	22136	22683	20452	24843	20228	18582	15717	15930	16787
EA667_004415|TolC_family_protein	143.216	0.578951	0.160423	3.6089	0.000307496	0.00231277	197	119	217	156	163	156	145	122	155	120	99	104
EA667_014215|inorganic_phosphate_transporter	1087.4	-0.367697	0.102093	-3.60161	0.000316258	0.00237541	1011	659	1034	1299	1408	1194	1320	1126	1014	1134	1105	931
CP039930_351555_351799	366.499	0.448599	0.124618	3.59979	0.00031847	0.00238875	429	345	529	362	372	349	414	444	341	269	250	359
EA667_017265|transcription_termination/antitermination_protein_NusA	5329.95	-0.316059	0.0879578	-3.5933	0.00032651	0.0024457	5093	3404	5037	5951	6206	5521	7551	5758	4978	4971	5186	5257
EA667_009060|carbohydrate_porin	22.7816	-1.35998	0.37909	-3.58749	0.000333881	0.00249748	16	16	13	22	11	13	32	23	16	28	39	41
EA667_016365|ribosome_small_subunit-dependent_GTPase_A	524.098	-0.362424	0.101036	-3.58709	0.00033439	0.00249788	512	357	626	538	590	571	507	415	488	566	596	583
EA667_012750|hypothetical_protein	151.152	0.603911	0.168411	3.58594	0.000335868	0.00250549	167	163	223	160	142	139	191	136	177	99	122	115
TG31307_3_278241_278355	321.505	-0.463896	0.129445	-3.58374	0.00033871	0.00252325	368	241	418	212	244	289	254	262	282	391	392	507
CP039930_183980_184144	662.095	-0.326367	0.0910995	-3.58254	0.000340272	0.00253144	678	506	775	626	660	640	659	555	641	719	745	784
EA667_019400|GntR_family_transcriptional_regulator	57.996	0.85766	0.2402	3.5706	0.000356163	0.00264606	74	49	89	74	66	73	58	58	65	40	36	30
CP039930_641531_641912	4849.76	0.240285	0.067309	3.56988	0.000357147	0.00264977	5559	3705	5589	5694	5731	5372	6140	5224	4762	3706	3711	4085
EA667_011170|cytochrome_ubiquinol_oxidase_subunit_I	272.265	0.477055	0.133671	3.56888	0.000358504	0.00265624	320	206	386	352	356	368	262	232	270	173	177	245
EA667_015130|peptidoglycan-binding_protein_LysM	1599.07	0.370458	0.103966	3.56327	0.000366258	0.00271001	2092	1595	2183	1435	1674	1826	1369	1458	1536	1330	1355	1506
CP039930_1080127_1080582	29.8743	-1.20313	0.337694	-3.56278	0.000366942	0.0027114	21	8	32	25	34	30	39	31	19	46	33	46
EA667_010845|30S_ribosomal_protein_S1	33166	-0.249908	0.0702188	-3.55899	0.000372277	0.00274711	33579	23000	33973	36470	37874	34159	40709	33810	30729	32526	33108	32901
CP039930_714564_715162	714.595	0.364098	0.102505	3.55202	0.000382291	0.00281721	745	578	749	850	795	748	1001	903	865	478	438	574
EA667_005230|hypothetical_protein	634.857	0.426398	0.120074	3.55113	0.00038358	0.0028229	745	656	1093	553	607	669	534	561	580	569	576	549
EA667_004750|elongation_factor_4	1915.57	-0.290584	0.0819105	-3.54758	0.000388783	0.00285735	1828	1379	1980	2067	2289	2059	2189	1786	1822	1944	2021	1854
EA667_011505|enoyl-CoA_hydratase/isomerase_family_protein	791.486	0.483116	0.13624	3.54607	0.000391027	0.00286998	1100	715	948	865	927	967	724	624	939	592	554	675
EA667_000420|IS91_family_transposase	160.557	-0.536945	0.151484	-3.54457	0.000393249	0.00288242	127	98	136	177	192	169	218	197	156	143	162	176
EA667_017855|ThiF_family_adenylyltransferase	108.985	-0.689684	0.194835	-3.53984	0.000400373	0.00293071	116	98	117	69	100	88	58	62	87	180	168	145
EA667_014760|ferric_iron_uptake_transcriptional_regulator	1531.55	-0.322494	0.0911191	-3.53926	0.000401253	0.00293322	1687	1145	1509	1564	1642	1563	1534	1396	1449	1698	1691	1600
CP039930_3596949_3597520	964.814	-0.321945	0.0910681	-3.53521	0.00040745	0.00297455	963	678	1092	986	886	982	997	949	1016	971	1020	1128
TG31307_4_30958_31025	11.9948	1.96637	0.556679	3.53232	0.000411928	0.00300323	24	15	16	15	16	16	10	11	11	4	4	5
EA667_000210|2,5-didehydrogluconate_reductase_DkgB	118.216	0.666456	0.188703	3.53177	0.000412796	0.00300555	155	108	203	128	117	120	137	114	100	76	118	71
EA667_009020|3-carboxy-cis,cis-muconate_cycloisomerase	26.8919	-1.16762	0.331045	-3.52707	0.000420191	0.00305533	26	15	22	18	23	26	14	20	26	43	45	41
EA667_003505|rod_shape-determining_protein_MreC	721.338	-0.366705	0.104016	-3.52546	0.000422747	0.00306983	724	465	743	811	903	786	803	603	658	761	814	688
EA667_008635|alpha/beta_hydrolase	19.9708	-1.38488	0.392871	-3.52504	0.000423425	0.00307067	11	11	19	16	20	15	21	20	8	34	25	39
EA667_016165|crotonase/enoyl-CoA_hydratase_family_protein	175.287	-0.640727	0.181791	-3.52452	0.000424254	0.00307261	128	96	167	187	158	158	258	230	192	159	135	265
EA667_019420|taurine_ABC_transporter_permease_TauC	46.8684	-0.892858	0.253717	-3.51911	0.000432992	0.00313175	54	31	48	28	36	22	34	38	41	60	70	96
EA667_009235|muconate_cycloisomerase	68.0697	-0.769273	0.21885	-3.51506	0.00043965	0.00317218	65	38	69	48	66	58	87	71	54	102	72	92
EA667_007200|flavin_reductase_family_protein	104.916	0.629946	0.179216	3.51501	0.000439742	0.00317218	117	100	149	122	117	114	124	115	106	78	61	78
EA667_002280|50S_ribosomal_protein_L5	12654.1	-0.288602	0.0821229	-3.51426	0.000440975	0.00317688	11954	7967	11970	14805	15741	13866	16515	13147	12627	12569	11792	11171
EA667_013955|adenylate_kinase	961.536	-0.303134	0.0863046	-3.51237	0.000444123	0.00319535	946	623	1036	979	1221	1052	1083	954	879	980	945	998
EA667_002935|aspartate--tRNA_ligase	3279.76	-0.267509	0.0761935	-3.51091	0.000446569	0.00320872	3339	1978	3309	3850	3969	3652	4075	3290	3135	3094	3031	3293
EA667_003500|rod_shape-determining_protein	1745.34	-0.287394	0.0819722	-3.506	0.000454901	0.00326068	1840	1144	1959	1875	2043	1940	1792	1558	1585	1816	1915	1729
CP039930_3307030_3307278	4921.26	-0.250088	0.0713326	-3.50594	0.000454992	0.00326068	4496	2924	4916	5705	6016	5239	6473	5872	5115	4289	4482	4549
EA667_000930|cell_division_protein_FtsA	2790.69	-0.32408	0.09261	-3.49941	0.00046629	0.00333727	3027	2174	3159	2652	2971	2779	2558	2165	2552	3185	3419	2975
TG31307_2_3373505_3373662	44.2739	1.03502	0.295811	3.49893	0.000467126	0.00333888	60	46	69	42	65	46	43	61	32	22	35	21
CP039930_2831604_2831690	24.2475	1.38965	0.397389	3.49695	0.000470617	0.00335944	24	25	43	26	34	32	30	34	19	15	9	8
CP039930_2565681_2565797	33.2467	1.06657	0.305048	3.49639	0.000471591	0.00335963	50	35	57	28	29	27	52	32	36	16	19	27
EA667_010325|hypothetical_protein	101.491	0.675015	0.193069	3.49624	0.000471872	0.00335963	100	77	127	124	108	115	152	149	122	46	60	68
EA667_004890|glutamate_5-kinase	786.586	-0.305755	0.0876232	-3.48943	0.000484055	0.00344189	760	492	797	841	913	811	1011	844	799	705	795	807
EA667_008605|hypothetical_protein	63.6551	-0.838757	0.240495	-3.48762	0.000487339	0.00346074	49	39	64	67	46	41	69	82	59	62	85	102
EA667_013345|argininosuccinate_synthase	2310.18	-0.282375	0.0812216	-3.4766	0.000507821	0.00360151	2295	1509	2340	2591	2862	2545	2727	2235	2187	2269	2383	2152
TG31307_2_3320419_3320529	14.1342	1.93903	0.558071	3.47453	0.000511746	0.00362464	21	18	19	21	21	11	13	11	23	5	7	2
CP039930_3082596_3082946	1143.33	0.36015	0.103673	3.47389	0.000512978	0.00362867	1324	862	1077	1519	1480	1402	1481	1369	1142	745	757	844
EA667_010985|hypothetical_protein	144.212	-0.577696	0.166314	-3.47352	0.000513672	0.00362889	149	99	129	165	157	136	131	131	122	172	196	147
EA667_007840|helix-turn-helix_domain-containing_protein	158.142	0.507851	0.14624	3.47273	0.000515188	0.0036349	206	159	261	142	149	147	154	147	154	142	116	144
EA667_002305|30S_ribosomal_protein_S5	10653.3	-0.301664	0.0870037	-3.46725	0.000525812	0.00370507	10128	5841	9647	13136	14127	12365	14479	11247	10781	9912	9349	9311
EA667_017165|exonuclease_V_subunit_beta	290.422	-0.47484	0.137147	-3.46226	0.000535661	0.00376962	238	135	326	327	366	328	358	313	293	259	320	290
EA667_005395|NADH:flavin_oxidoreductase/NADH_oxidase	48.7177	-0.827182	0.239787	-3.44965	0.000561317	0.00394509	46	31	43	44	44	41	56	42	43	67	59	69
EA667_017235|monovalent_cation/H+_antiporter_subunit_D	563.441	-0.326328	0.094675	-3.44682	0.000567222	0.00398148	606	371	632	583	622	558	609	516	507	624	609	597
EA667_006245|DUF3465_domain-containing_protein	67.194	-0.741933	0.215403	-3.44439	0.000572342	0.00401227	52	41	68	77	68	57	66	65	70	74	80	92
EA667_013375|NADH:flavin_oxidoreductase/NADH_oxidase_family_protein	163.796	-0.574793	0.167039	-3.44107	0.000579429	0.00405674	171	85	164	159	161	195	165	164	159	153	173	241
EA667_001490|sel1_repeat_family_protein	1233.37	0.461508	0.134147	3.44031	0.00058105	0.00406289	1174	855	1736	1457	1301	1302	1887	1699	1316	713	687	1077
EA667_011530|thioesterase_family_protein	136.49	0.619649	0.180171	3.43922	0.000583396	0.00407409	136	116	193	155	186	145	140	173	162	88	74	103
EA667_016800|tRNA_pseudouridine(38-40)_synthase_TruA	294.69	0.416039	0.121044	3.43708	0.000588023	0.00410116	386	254	486	278	284	305	306	263	273	241	226	298
CP039930_3832372_3832534	379.544	0.49017	0.142871	3.43086	0.000601663	0.00419094	580	326	455	409	424	460	347	329	408	312	306	265
EA667_017525|50S_ribosomal_protein_L11	11801.8	-0.269162	0.0785052	-3.42858	0.000606737	0.00422091	11401	7028	11412	13987	14475	12734	16041	12750	11615	10792	10810	11055
EA667_007555|hypothetical_protein	299.324	0.548709	0.160164	3.42593	0.000612709	0.00425704	452	229	526	256	270	394	287	265	262	267	208	261
EA667_012480|cold-shock_protein	321.002	-0.853763	0.249257	-3.42523	0.00061427	0.00426247	167	145	250	351	324	246	633	563	314	253	343	331
EA667_009645|DUF2075_domain-containing_protein	29.1469	-1.17442	0.34291	-3.42485	0.000615135	0.00426307	19	10	41	27	23	18	30	20	24	33	54	53
EA667_002090|DEAD/DEAH_box_helicase	5970.38	-1.03319	0.30211	-3.41991	0.000626411	0.00433572	2791	3606	5700	5142	4638	3523	10826	8285	4559	6321	8082	8545
TG31307_2_3053798_3053914	39.6303	1.01076	0.295696	3.41825	0.000630243	0.00435672	43	49	67	37	32	40	52	35	53	20	26	27
EA667_004950|hypothetical_protein	67.1999	0.773378	0.226273	3.4179	0.000631062	0.00435688	82	64	112	70	66	78	71	71	71	36	39	63
EA667_002340|30S_ribosomal_protein_S4	19390.8	-0.261633	0.0765753	-3.41668	0.000633904	0.00437098	19033	11549	18567	22892	24823	21960	24522	20367	19467	18475	17584	17401
EA667_010220|acetoin_reductase	295.427	0.47228	0.138566	3.40833	0.000653624	0.00450128	310	154	279	375	423	432	426	363	408	148	171	165
EA667_017270|ribosome_maturation_factor_RimP	931.988	-0.341215	0.100196	-3.40548	0.000660475	0.00454274	902	670	994	953	1072	896	1078	918	824	972	1093	907
EA667_002320|preprotein_translocase_subunit_SecY	23553.7	-0.284746	0.0836731	-3.40308	0.000666304	0.00457707	21938	13132	20220	29008	31194	27733	32497	26412	24677	21318	20094	19813
EA667_019645|hypothetical_protein	31.1292	-1.09011	0.320497	-3.40133	0.000670588	0.00460072	18	21	36	15	23	31	23	34	23	48	47	51
EA667_010625|HU_family_DNA-binding_protein	3018.71	-0.231555	0.0682139	-3.39454	0.00068744	0.00471042	3108	2083	3079	3259	3568	3306	3433	3115	2837	2859	2963	3063
EA667_017590|general_secretion_pathway_protein	130.516	-0.571554	0.16845	-3.39302	0.000691257	0.00473044	114	72	134	139	121	148	166	142	118	162	126	143
EA667_017585|type_II_secretion_system_protein_GspD	334.642	-0.39111	0.11528	-3.39269	0.000692091	0.00473044	318	223	355	356	371	328	422	336	281	364	342	366
TG31307_3_217583_217935	81.9616	-0.684368	0.201922	-3.38926	0.000700803	0.00478401	77	74	75	72	73	65	62	77	60	107	101	131
EA667_000010|DNA_polymerase_III_subunit_beta	851.713	-0.308097	0.0909178	-3.38874	0.000702143	0.00478718	867	651	909	829	931	948	847	768	775	900	961	898
EA667_005090|RluA_family_pseudouridine_synthase	474.775	-0.346183	0.102386	-3.38117	0.00072177	0.00491487	482	328	533	449	553	506	468	418	457	490	492	576
EA667_003790|multidrug_efflux_RND_transporter_outer_membrane_channel_subunit_AdeK	4762.33	-0.275857	0.0815994	-3.38062	0.000723217	0.0049186	4415	2651	4718	5799	5939	5374	6502	5234	4747	4333	4283	4264
EA667_005630|uroporphyrinogen_decarboxylase	280.076	-0.406651	0.120557	-3.37311	0.000743236	0.00504847	258	178	258	329	353	333	294	282	273	270	302	269
EA667_003030|tryptophan_synthase_subunit_beta	545.396	-0.374154	0.110951	-3.37224	0.00074559	0.00505817	590	354	598	519	624	596	552	455	509	636	626	547
EA667_014805|phosphomannomutase/phosphoglucomutase	1074.58	0.397393	0.117861	3.37171	0.000747034	0.00506169	1406	1040	1571	1065	976	1262	902	925	1084	866	872	1063
CP039930_100806_100880	30.8844	-1.05764	0.313717	-3.3713	0.00074814	0.00506291	19	15	38	33	28	20	33	25	26	42	46	47
EA667_018375|hypothetical_protein	316.887	0.375941	0.111564	3.36974	0.000752399	0.00508543	385	252	416	347	319	339	393	345	337	232	247	260
EA667_003545|long-chain_fatty_acid_transporter	3843.84	0.272943	0.0810677	3.36685	0.000760319	0.00513262	3882	2535	4081	4864	4589	4096	5734	5018	4479	2454	2500	2973
TG31307_2_3609177_3609247	5.24426	-2.98778	0.887812	-3.36533	0.000764521	0.00515463	2	1	2	4	5	2	8	1	1	14	10	12
EA667_011475|TMF_family_protein	184.281	0.531581	0.157983	3.36479	0.000766006	0.00515518	256	160	229	211	181	224	186	174	216	147	124	137
EA667_019345|alkyl_hydroperoxide_reductase_subunit_F	129.804	0.591504	0.175801	3.36462	0.000766488	0.00515518	159	79	166	144	154	168	190	155	148	85	84	72
EA667_017535|preprotein_translocase_subunit_SecE	4589.49	-0.281877	0.0837949	-3.36389	0.000768528	0.00516255	4765	3186	4200	5268	5462	4924	5349	4513	4419	4367	4660	4567
EA667_001155|DUF475_domain-containing_protein	310.571	-0.414311	0.123222	-3.36231	0.000772923	0.00518569	324	182	268	335	381	345	375	324	302	306	325	309
EA667_001240|MFS_transporter	27.5528	-1.09148	0.324879	-3.35966	0.000780393	0.0052294	16	17	32	27	20	30	21	22	18	42	43	41
EA667_016960|DMT_family_transporter	38.3868	1.08616	0.323492	3.35761	0.000786187	0.00526178	74	31	57	51	30	51	45	44	23	17	22	30
TG31307_3_39199_39259	25.9718	-1.09881	0.327309	-3.35711	0.000787626	0.00526496	22	14	26	27	20	23	18	22	18	37	34	50
CP039930_99355_99737	530.201	0.359188	0.107046	3.35544	0.000792377	0.00529025	592	466	647	577	605	555	600	636	550	444	380	398
TG31307_2_3350053_3350155	19.9604	1.40082	0.418635	3.34616	0.000819393	0.00546395	23	20	32	23	27	29	23	20	23	7	9	10
CP039930_1808379_1808594	100.536	-0.659279	0.197089	-3.34508	0.000822586	0.00547857	80	72	90	96	94	92	129	129	76	112	100	142
TG31307_3_166298_166925	33.4	-1.01361	0.303221	-3.3428	0.000829373	0.00551705	38	21	23	31	25	24	33	33	18	55	47	50
EA667_002165|acyl-CoA_thioesterase_II	336.2	-0.394473	0.118024	-3.34232	0.000830817	0.00551994	286	190	359	358	370	371	443	371	357	310	293	394
TG31307_2_3115054_3115133	269.309	-0.436625	0.130725	-3.34001	0.00083775	0.00555924	224	158	294	321	320	257	345	276	256	250	273	308
EA667_004960|peptidylprolyl_isomerase	3835.11	-0.220923	0.0662377	-3.3353	0.000852074	0.00564745	3885	2859	4334	3913	3938	3965	4253	4011	3475	3772	3837	4226
EA667_000395|IS6-like_element_IS26_family_transposase	97.9535	-0.654659	0.196396	-3.33336	0.000858036	0.00568007	85	55	88	91	130	106	133	76	99	116	102	109
EA667_010740|ABC_transporter_ATP-binding_protein	84.6551	-0.673236	0.202732	-3.32082	0.000897548	0.00593445	64	37	86	99	81	95	101	107	92	82	90	97
EA667_004165|co-chaperone_GroES	1328.78	-0.339385	0.102225	-3.31999	0.000900212	0.00594488	1436	1016	1455	1288	1397	1445	1161	987	1295	1460	1441	1641
EA667_001230|GFA_family_protein	126.082	0.599622	0.180718	3.31801	0.000906628	0.00598003	174	106	198	153	128	145	155	107	98	105	70	111
EA667_017500|DNA-directed_RNA_polymerase_subunit_beta'	23494.7	-0.242815	0.0732445	-3.31513	0.000916016	0.00603467	22967	14965	23832	27158	27503	24453	31104	24562	23257	22072	22098	22345
CP039930_3907414_3907479	128.043	0.558385	0.168727	3.30939	0.000934983	0.00615221	176	124	176	122	127	140	117	137	139	106	95	95
EA667_016115|2-amino-4-hydroxy-6-_hydroxymethyldihydropteridine_diphosphokinase	309.297	-0.412718	0.124774	-3.30772	0.000940604	0.00618175	289	229	283	345	356	378	337	289	249	345	332	306
EA667_007225|potassium-transporting_ATPase_subunit_KdpA	42.7522	1.13571	0.343435	3.30693	0.000943251	0.00619171	46	18	44	74	72	52	90	54	44	17	14	13
EA667_009900|pyrroloquinoline_quinone_biosynthesis_protein_PqqE	295.109	0.476474	0.144133	3.3058	0.000947059	0.00620926	386	323	431	266	329	344	242	210	281	256	271	228
EA667_010960|nucleotidyltransferase_family_protein	323.074	-0.402829	0.121913	-3.30423	0.000952378	0.00623665	338	211	323	320	371	355	362	270	314	378	341	331
EA667_003100|MHS_family_MFS_transporter	390.555	0.364485	0.11033	3.30359	0.000954554	0.00624342	456	342	473	420	455	382	489	394	438	294	306	307
EA667_017745|D-alanyl-D-alanine_endopeptidase_PBP7/8	2709.69	0.25505	0.0772381	3.30213	0.000959548	0.00626181	3134	2143	3789	2731	2729	2918	3068	2798	2850	2131	2210	2559
EA667_001035|3-deoxy-D-manno-octulosonic_acid_transferase	129.506	-0.557852	0.168939	-3.30209	0.000959656	0.00626181	135	63	132	124	152	152	156	117	110	137	144	157
EA667_002285|30S_ribosomal_protein_S14	7385.54	-0.271146	0.0822317	-3.29734	0.000976038	0.00636112	6955	4752	7107	8616	9232	8281	9396	7550	7311	7264	7053	6403
EA667_004540|DUF3106_domain-containing_protein	651.786	0.307467	0.0932618	3.29682	0.000977864	0.00636543	772	594	990	611	639	658	657	657	605	574	563	599
EA667_018740|glycosyltransferase_family_4_protein	265.361	-0.395643	0.120043	-3.29584	0.000981286	0.00638011	261	181	262	287	291	267	309	266	242	274	297	276
EA667_013875|hypothetical_protein	10.5297	2.04674	0.622581	3.28751	0.00101076	0.00656396	16	12	17	12	12	11	10	11	18	2	4	4
EA667_010080|thiolase_family_protein	2745.54	0.382335	0.116385	3.28507	0.00101955	0.0066132	3632	2353	3388	2795	3106	3679	2546	2360	2982	1984	2204	2407
CP039930_3347482_3347606	132.694	0.523113	0.159772	3.27412	0.00105992	0.00686691	177	117	210	139	119	117	153	136	134	91	103	125
CP039930_3947222_3947292	11.6933	1.91219	0.585573	3.2655	0.00109271	0.00707096	23	9	28	7	15	13	11	10	16	9	4	1
CP039930_2305738_2305861	50.6455	0.920918	0.282322	3.26194	0.00110651	0.00715178	56	49	63	63	56	50	87	76	40	30	21	31
TG31307_3_275460_275655	76.457	0.723684	0.222088	3.25855	0.00111985	0.00722944	98	69	90	75	91	106	92	93	78	36	59	48
EA667_017520|50S_ribosomal_protein_L1	10748.9	-0.270186	0.083071	-3.25247	0.00114406	0.00737702	10128	6442	10328	13070	13045	11499	15021	11797	10439	9834	9747	9914
EA667_009920|pyrroloquinoline_quinone_precursor_peptide_PqqA	191.423	0.444857	0.136871	3.2502	0.00115326	0.00742757	235	180	260	198	189	217	213	201	181	136	157	162
CP039930_563652_563703	387.264	-0.360244	0.110922	-3.24772	0.00116335	0.00747887	357	270	341	409	470	430	494	391	390	372	368	406
EA667_010745|ABC_transporter_permease	84.1119	-0.6468	0.199164	-3.24757	0.00116396	0.00747887	69	47	69	93	109	93	105	88	84	71	99	95
TG31307_2_181278_181462	2107.41	-0.297512	0.0916337	-3.24675	0.00116731	0.00749163	2049	1110	1911	2677	2620	2351	2844	2396	2197	1886	1821	1924
EA667_016505|phosphate_acetyltransferase	1674.87	0.409264	0.126093	3.24573	0.00117151	0.00750978	2395	1766	2341	1629	1765	1754	1279	1157	1628	1607	1534	1365
EA667_009575|HlyD_family_secretion_protein	16.0873	-1.34524	0.414571	-3.24489	0.00117496	0.00752307	11	9	14	13	19	12	15	9	11	27	24	28
EA667_008390|PLP-dependent_aminotransferase_family_protein	57.8768	-0.822431	0.253921	-3.23892	0.00119981	0.0076732	39	30	75	47	54	47	71	57	52	75	53	102
EA667_003915|rhodanese-related_sulfurtransferase	1175.42	-0.265262	0.0820087	-3.23456	0.00121832	0.00777748	1168	762	1186	1293	1345	1377	1440	1170	1150	1037	1114	1271
EA667_009085|MBL_fold_metallo-hydrolase	99.6796	-0.648069	0.200367	-3.2344	0.00121897	0.00777748	107	63	106	97	64	77	103	90	98	126	97	172
CP039930_837012_837325	597.974	-0.343814	0.106395	-3.23148	0.0012315	0.00784832	537	364	725	606	705	591	717	632	544	621	618	622
EA667_018640|Fe/S-dependent_2-methylisocitrate_dehydratase_AcnD	941.608	-0.286427	0.0890083	-3.21798	0.00129095	0.00821762	962	550	971	1010	1004	1064	1147	1023	1000	884	849	1012
EA667_005945|HeH/LEM_domain_protein	40.3205	0.998567	0.310748	3.21343	0.0013116	0.00833932	45	48	62	54	49	23	45	44	48	20	24	28
CP039930_2670063_2670117	2.5773	-4.73602	1.47774	-3.2049	0.00135107	NA	0	1	0	0	0	0	0	1	0	8	4	15
EA667_017740|threonine_synthase	2097.94	-0.276205	0.0862585	-3.20206	0.0013645	0.00866558	2218	1460	2088	2350	2495	2296	2266	1866	2013	2103	2247	2036
EA667_012265|DUF2147_domain-containing_protein	16.8014	1.52736	0.477674	3.19749	0.00138627	0.0087866	20	19	20	21	20	19	21	24	22	9	4	6
EA667_015085|ribose-phosphate_pyrophosphokinase	7910.99	-0.277886	0.0869104	-3.19739	0.00138677	0.0087866	7582	6151	7996	8292	9378	8084	9147	7324	7336	8106	8415	7856
EA667_009205|3-oxoadipate_enol-lactonase	20.8591	-1.21133	0.379117	-3.19513	0.00139768	0.00884388	21	14	12	17	23	13	12	20	14	31	31	39
TG31307_2_204543_204971	53.9581	-0.784627	0.245591	-3.19485	0.00139904	0.00884388	55	31	37	61	61	51	59	45	56	65	69	60
TG31307_2_3179082_3179248	12.3971	1.63158	0.510827	3.194	0.00140315	0.00885964	22	14	29	15	15	14	5	8	12	6	4	9
EA667_008210|transcriptional_regulator	32.5755	-0.966695	0.304233	-3.17748	0.00148561	0.00936947	26	18	28	30	36	30	40	31	25	50	44	34
EA667_009090|IclR_family_transcriptional_regulator_PcaU	54.3262	-0.745388	0.235112	-3.17035	0.00152253	0.00959124	56	38	65	33	33	56	41	42	42	79	72	92
EA667_009535|ABC_transporter_ATP-binding_protein	23.0903	-1.1346	0.357953	-3.16968	0.00152604	0.00960232	14	18	27	21	12	14	14	20	13	33	47	39
EA667_003205|amino_acid_permease	603.538	-0.359489	0.113567	-3.16544	0.00154846	0.00973218	557	357	553	674	769	658	849	630	599	572	624	516
EA667_002650|50S_ribosomal_protein_L13	10366.1	-0.250198	0.0791186	-3.16231	0.00156522	0.00982618	10360	7645	10850	11061	11638	10049	12631	10515	9366	10283	10865	10379
CP039930_337304_337758	247.206	-0.509272	0.161098	-3.16125	0.00157093	0.00984205	214	167	306	190	223	296	241	207	252	248	283	360
EA667_004700|sulfate_ABC_transporter_permease_subunit_CysT	11.1385	-1.67255	0.529091	-3.16117	0.00157134	0.00984205	5	5	12	5	5	5	12	5	14	21	27	15
EA667_005640|DUF3015_domain-containing_protein	1968.87	-0.245616	0.0778003	-3.157	0.00159402	0.00997263	1730	1246	2011	2313	2336	2082	2372	2403	2090	1723	1750	1925
EA667_003000|acyl-CoA_desaturase	3489.48	-0.221784	0.0702808	-3.15568	0.00160126	0.0100065	3690	2670	4359	3288	3659	3386	3602	3021	3154	3732	3873	3781
CP039930_366623_366830	5042.2	-0.249413	0.0790964	-3.15328	0.00161449	0.0100777	4976	3167	5036	5511	5896	5194	6935	5632	4869	4577	4724	4965
CP039930_3892542_3892734	103.425	0.554325	0.175851	3.15224	0.00162023	0.010102	159	101	143	104	112	116	93	97	82	77	91	83
EA667_016915|RluA_family_pseudouridine_synthase	425.577	-0.318438	0.101032	-3.15186	0.00162234	0.0101036	426	269	446	477	453	435	520	429	424	425	415	455
EA667_018480|MHS_family_MFS_transporter	67.2806	0.777036	0.246799	3.14845	0.00164136	0.0102104	99	57	105	62	85	76	64	65	74	44	64	29
TG31307_3_25841_26014	12.7717	-1.45103	0.461101	-3.14687	0.00165026	0.0102541	9	6	15	9	9	8	4	8	9	27	20	27
EA667_004005|Ig-like_domain-containing_protein	5136.38	-0.283162	0.090015	-3.14573	0.00165675	0.0102828	4887	3115	5774	5366	5057	5098	7127	5989	5057	4442	5010	5714
EA667_003510|rod_shape-determining_protein_MreD	273.383	-0.417814	0.132838	-3.14531	0.00165914	0.0102859	286	166	258	290	350	286	327	259	238	292	306	264
EA667_019730|hypothetical_protein	112.601	0.582328	0.185242	3.1436	0.00166882	0.0103342	129	82	174	109	144	130	142	112	133	84	64	84
EA667_015095|aminoacyl-tRNA_hydrolase	1840.14	-0.282892	0.0900903	-3.14009	0.00168896	0.0104471	1929	1556	2040	1753	2030	1844	1790	1479	1524	2100	2138	1969
CP039930_3933083_3933256	53.5973	0.830345	0.264602	3.13809	0.00170055	0.0105069	60	77	104	64	43	59	31	40	41	43	36	47
EA667_004410|HlyD_family_secretion_protein	162.63	0.505206	0.161023	3.13748	0.00170408	0.0105168	213	134	233	183	155	205	155	152	185	121	122	128
EA667_000495|type_VI_secretion_protein_ImpB	68.6588	0.874731	0.278955	3.13574	0.00171419	0.0105673	91	71	95	97	70	51	103	83	50	26	62	41
EA667_015500|hypothetical_protein	277.279	0.395433	0.126156	3.13447	0.00172164	0.0106013	366	274	393	256	263	303	265	250	270	243	205	274
EA667_019650|S24_family_peptidase	81.7629	-0.644715	0.205782	-3.133	0.00173031	0.0106427	63	51	81	71	99	62	110	93	81	79	96	104
TG31307_2_352247_352456	3119.66	-0.266889	0.0852126	-3.13204	0.00173595	0.0106654	3055	1897	2838	3680	3971	3419	3985	3661	2991	2703	2842	3016
CP039930_1194053_1194198	611.884	-0.344198	0.109936	-3.13089	0.00174276	0.0106952	564	381	584	766	729	568	711	719	641	576	600	596
EA667_018050|TIGR00730_family_Rossman_fold_protein	101.995	0.62831	0.201027	3.1255	0.00177504	0.0108811	108	105	198	104	99	102	106	81	99	85	88	68
CP039930_465409_465516	5249.39	-0.244461	0.0782319	-3.12483	0.00177911	0.0108938	4928	3162	4825	6493	6860	6132	6701	5534	5501	4864	4618	4455
CP039930_2351525_2351668	51.5412	0.858151	0.274674	3.12426	0.00178254	0.0109026	63	71	78	59	39	50	44	45	60	42	39	28
EA667_000475|sulfonamide-resistant_dihydropteroate_synthase_Sul2	1227.33	-0.326536	0.104591	-3.12201	0.0017962	0.0109739	960	707	1318	1447	1417	1243	1788	1493	1237	1026	1102	1268
EA667_019740|hypothetical_protein	94.8269	0.614761	0.196935	3.12164	0.00179847	0.0109755	108	89	127	102	109	86	110	131	99	61	74	59
EA667_015195|8-amino-7-oxononanoate_synthase	83.706	-0.735199	0.235681	-3.11946	0.00181182	0.0110411	73	31	59	113	105	87	130	112	71	62	98	85
EA667_019255|AzlC_family_ABC_transporter_permease	52.0135	0.882013	0.282767	3.11923	0.00181327	0.0110411	60	53	63	54	72	51	82	66	48	29	16	44
CP039930_2386330_2386534	573.318	1.01506	0.325561	3.11788	0.00182156	0.011075	442	397	862	856	755	679	984	1000	408	220	239	300
EA667_018870|hypothetical_protein	219.565	0.431267	0.13833	3.11767	0.00182288	0.011075	271	168	354	222	235	240	218	230	222	161	178	191
EA667_008340|nitrite_reductase_small_subunit_NirD	12.8912	-1.60131	0.514072	-3.11494	0.0018398	0.0111621	8	6	8	9	13	22	6	6	14	23	21	17
CP039930_528711_528883	2429.21	-0.268213	0.0861121	-3.1147	0.0018413	0.0111621	2424	1689	2626	2582	2642	2416	3009	2517	2179	2495	2592	2309
EA667_004345|diaminopimelate_decarboxylase	719.769	-0.298428	0.0958385	-3.11386	0.00184658	0.0111701	748	511	772	671	748	823	817	685	662	701	802	780
EA667_009730|AraC_family_transcriptional_regulator	40.2591	-0.828666	0.266124	-3.11384	0.0018467	0.0111701	40	24	42	43	28	33	32	34	35	53	61	57
EA667_018530|RidA_family_protein	760.688	0.434536	0.139803	3.10821	0.00188225	0.0113725	1096	627	897	882	848	900	697	665	885	649	595	520
EA667_009660|YciI_family_protein	7.73551	-2.18114	0.7037	-3.09953	0.00193828	0.0116873	2	4	2	6	11	6	10	7	10	12	10	12
CP039930_1338558_1338623	155.112	0.518166	0.167191	3.09924	0.00194017	0.0116873	245	150	187	143	186	174	136	152	137	134	122	117
CP039930_371197_371406	109.347	0.568795	0.183533	3.09915	0.00194075	0.0116873	131	122	140	94	107	118	126	125	113	92	71	83
EA667_003355|entericidin_A/B_family_lipoprotein	2411.21	0.382778	0.12359	3.09715	0.0019539	0.0117535	2437	2189	4041	2205	2403	2484	2385	2794	2375	1787	1936	2334
EA667_005780|hypothetical_protein	479.868	-0.314232	0.101714	-3.08937	0.00200584	0.0120527	510	318	563	463	502	492	484	476	440	530	539	497
TG31307_2_3037424_3037807	25.1662	1.12954	0.365666	3.089	0.00200833	0.0120544	38	36	44	16	27	38	14	23	18	14	19	17
EA667_009780|excinuclease_ABC_subunit_UvrA	45.6039	0.822457	0.266338	3.08802	0.00201494	0.0120808	61	49	86	40	51	35	34	49	49	31	33	37
CP039930_192624_192772	20.0471	1.292	0.418696	3.08576	0.0020303	0.0121596	43	20	37	22	13	18	31	9	18	11	9	17
EA667_006380|YfhL_family_4Fe-4S_dicluster_ferredoxin	73.5054	-0.719652	0.2334	-3.08334	0.00204691	0.0122431	73	41	90	53	48	93	58	70	57	89	95	119
EA667_000960|biotin/lipoyl-binding_protein	2318.52	0.225689	0.0732026	3.08308	0.00204872	0.0122431	2588	1608	2847	2670	2732	2595	3020	2573	2335	1759	1758	1939
EA667_003930|succinate_dehydrogenase,_cytochrome_b556_subunit	2042.33	0.243152	0.0789068	3.08151	0.00205953	0.0122942	2383	1556	2409	2456	2526	2222	2545	1976	2008	1627	1599	1666
EA667_005300|carbon_starvation_protein_A	1290.53	0.270654	0.0878993	3.07914	0.00207599	0.0123691	1594	900	1457	1548	1650	1477	1562	1334	1321	987	961	1025
EA667_003090|preprotein_translocase_subunit_SecA	3203.97	-0.218248	0.0708816	-3.07905	0.0020766	0.0123691	3351	2366	3708	3214	3323	3429	3346	2872	3180	3261	3245	3512
EA667_019140|ribonuclease_P_protein_component	1805.4	-0.249647	0.081237	-3.07307	0.00211871	0.0126062	1777	1398	1915	1860	2127	1820	1955	1743	1668	1800	1907	1869
EA667_001605|phospho-N-acetylmuramoyl-pentapeptide-_transferase	387.829	-0.416122	0.13546	-3.07191	0.00212692	0.0126413	427	204	390	413	436	395	539	367	338	428	372	426
CP039930_98074_98166	54.149	0.795109	0.258897	3.07115	0.00213239	0.01266	71	52	70	73	52	48	78	69	47	33	39	30
EA667_014200|hypothetical_protein	118.895	0.707087	0.230455	3.06823	0.00215332	0.0127704	129	95	220	133	106	97	173	146	123	67	52	127
EA667_015365|MFS_transporter	62.8268	0.703916	0.229825	3.06283	0.00219256	0.0129891	80	54	95	76	74	68	79	48	70	40	38	50
EA667_011140|hypothetical_protein	165.191	0.458206	0.149703	3.06077	0.00220766	0.0130644	192	138	191	168	208	176	219	202	177	104	122	122
EA667_016170|NAD(P)-dependent_oxidoreductase	204.272	-0.437463	0.143155	-3.05588	0.00224403	0.0132652	186	128	209	210	180	187	266	231	233	197	181	270
EA667_008080|hypothetical_protein	21.4844	1.18892	0.389128	3.05534	0.00224809	0.0132749	33	20	32	20	30	19	30	27	20	10	11	13
TG31307_3_249791_249844	35.3747	-0.867976	0.284373	-3.05225	0.00227135	0.0133962	33	35	35	20	19	24	30	18	26	51	68	56
TG31307_3_209471_209660	74.6508	-0.666178	0.218279	-3.05196	0.00227353	0.0133962	68	59	87	55	46	74	64	50	75	115	100	96
CP039930_855125_855516	1314.9	0.345458	0.11323	3.05095	0.00228119	0.0134136	1782	1244	1602	1459	1666	1380	1222	1008	1236	1212	1119	1021
TG31307_2_3342208_3342448	8.48858	2.12134	0.695311	3.05092	0.00228139	0.0134136	11	12	20	8	16	7	12	4	6	2	6	1
TG31307_2_62592_62881	19.1043	1.30536	0.428985	3.04291	0.00234301	0.0137611	18	20	35	21	19	27	24	25	19	8	9	10
EA667_005350|hydrolase	47.1643	0.832588	0.273708	3.04189	0.00235099	0.0137931	46	62	71	46	40	44	59	54	53	24	35	35
EA667_014840|septum_site-determining_protein_MinD	3157.1	-0.195635	0.0643468	-3.04032	0.00236329	0.0138504	3307	2301	3647	3301	3323	3444	3391	2953	2954	3157	3225	3286
EA667_017910|copper_oxidase	189.73	0.443244	0.145923	3.03752	0.00238531	0.0139645	286	162	250	192	173	219	215	171	179	148	148	172
EA667_016045|50S_ribosomal_protein_L20	6497.75	-0.241299	0.0794494	-3.03714	0.00238838	0.0139675	5959	4006	6374	7792	7996	6860	9009	7272	6465	5868	5851	5871
CP039930_1924822_1925007	6.20935	-2.17359	0.715747	-3.03681	0.00239096	0.0139677	3	2	6	3	3	5	1	1	4	15	7	23
EA667_000730|SDR_family_NAD(P)-dependent_oxidoreductase	90.1168	-0.592285	0.195296	-3.03276	0.00242331	0.0141416	70	52	92	74	94	106	116	104	92	82	102	110
EA667_017345|YqgE/AlgH_family_protein	362.31	-0.396666	0.130822	-3.0321	0.00242862	0.0141575	385	216	397	350	329	389	431	403	314	342	362	488
EA667_003150|carbohydrate_porin	2314.17	0.242682	0.0801642	3.02731	0.00246738	0.0143681	2587	1562	2574	2815	2717	2594	3220	2744	2415	1639	1696	1827
EA667_018570|RluA_family_pseudouridine_synthase	34.1057	-0.939113	0.310418	-3.02532	0.0024837	0.0144332	23	16	30	50	38	34	34	42	26	45	38	37
EA667_000925|FtsQ-type_POTRA_domain-containing_protein	778.33	-0.259464	0.0857645	-3.0253	0.00248384	0.0144332	821	607	875	746	875	803	779	674	697	819	839	871
CP039931_18498_18670	2.50455	4.4816	1.48158	3.02489	0.00248727	NA	10	1	3	4	3	6	1	2	2	0	0	0
EA667_019640|hypothetical_protein	10.8159	-1.55798	0.515403	-3.02284	0.00250417	0.0145359	5	7	11	7	9	12	4	3	7	26	17	19
CP039930_1744600_1744795	76.4457	0.645311	0.213937	3.01636	0.0025583	0.0148343	91	58	93	85	82	84	110	116	79	49	44	48
EA667_018995|hypothetical_protein	72.3795	0.634815	0.210584	3.01454	0.00257368	0.0149077	102	72	157	59	60	75	56	62	49	60	66	66
EA667_002315|50S_ribosomal_protein_L15	8445.02	-0.270175	0.0896559	-3.01347	0.00258281	0.0149448	8022	4828	7609	10488	11130	9750	11588	9126	8325	7950	7269	7180
CP039930_3854692_3854929	548.988	0.410754	0.136355	3.01238	0.00259209	0.0149826	477	444	766	645	715	593	697	679	554	343	334	487
TG31307_2_3029323_3029526	26.0003	-1.16318	0.386256	-3.01142	0.00260031	0.0150143	14	8	17	27	27	19	64	38	26	28	26	25
EA667_007020|tRNA_uridine-5-carboxymethylaminomethyl(34)_synthesis_enzyme_MnmG	2634.51	-0.271004	0.0900528	-3.00938	0.00261777	0.0150991	2629	1973	2912	2805	2979	2804	2804	2226	2445	2768	3004	2524
CP039931_51675_51870	6.18524	3.02743	1.00613	3.00898	0.00262126	0.0151033	9	9	8	9	5	8	5	9	10	0	1	2
EA667_019605|replication_initiation_protein	466.012	-0.343722	0.114341	-3.00612	0.00264604	0.01523	477	296	565	430	506	504	467	433	445	443	482	614
EA667_017825|ammonium_transporter	304.629	-0.499566	0.166331	-3.00344	0.00266946	0.0153487	259	136	372	356	279	349	407	326	283	259	311	395
EA667_005930|hypothetical_protein	22.4126	1.27673	0.425172	3.00285	0.00267461	0.0153534	17	25	43	17	19	23	34	38	26	17	9	6
EA667_018535|alanine_racemase	1454.97	0.346318	0.115339	3.00261	0.00267673	0.0153534	1854	1049	1833	1728	1569	1793	1523	1362	1722	1093	984	1299
EA667_007035|hypothetical_protein	58.5385	0.700158	0.2332	3.00239	0.0026787	0.0153534	69	53	90	72	62	64	69	56	63	44	32	43
CP039930_3782939_3783434	102.507	-0.575734	0.191842	-3.00108	0.00269023	0.0154002	83	50	103	123	117	100	139	126	92	119	88	111
EA667_017210|bifunctional_phosphoribosyl-AMP_cyclohydrolase/phosphoribosyl-ATP_diphosphatase_HisIE	464.848	-0.337006	0.112305	-3.00082	0.0026925	0.0154002	483	257	491	504	546	505	554	457	470	407	503	493
EA667_001865|NAD(P)H-dependent_oxidoreductase	135.122	0.483135	0.161148	2.99809	0.0027168	0.0155141	154	132	215	122	148	118	163	130	136	99	107	122
EA667_002295|50S_ribosomal_protein_L6	14889.8	-0.231686	0.0772947	-2.99743	0.00272265	0.0155141	14327	9430	13866	17429	18403	17412	19447	15606	15233	14000	13477	12870
EA667_019835|hypothetical_protein	91.6111	0.58442	0.194974	2.99742	0.00272272	0.0155141	104	64	138	106	111	125	108	101	89	57	65	62
EA667_011345|transporter_substrate-binding_domain-containing_protein	27.7833	-1.01188	0.337596	-2.99731	0.00272376	0.0155141	21	26	22	18	19	17	22	26	24	41	57	32
EA667_019325|RNA_methyltransferase	370.576	0.348163	0.116355	2.99223	0.00276945	0.0157579	375	283	496	411	463	485	451	356	398	258	275	292
CP039930_2362587_2362728	9.45165	1.81444	0.607643	2.98603	0.00282622	0.0160642	12	25	21	4	7	11	5	5	5	5	2	9
EA667_015145|ACP_S-malonyltransferase	2815.35	0.29733	0.0996582	2.9835	0.00284976	0.0161734	3186	1929	2905	3593	3849	3286	4025	3208	2672	1898	2090	1957
EA667_017095|hypothetical_protein	260.907	0.522322	0.175081	2.98333	0.00285134	0.0161734	246	172	413	269	225	270	393	389	321	157	131	232
EA667_012640|DUF1653_domain-containing_protein	110.985	0.580403	0.194702	2.98098	0.00287328	0.0162809	151	110	166	103	111	117	111	127	94	76	62	125
TG31307_3_95248_95433	6.01719	-2.24924	0.755704	-2.97634	0.00291706	0.0165119	0	4	5	6	4	4	3	0	4	15	9	16
EA667_009420|SMP-30/gluconolactonase/LRE_family_protein	20.5138	-1.17674	0.395852	-2.97268	0.00295213	0.0166931	17	4	23	23	17	18	26	17	17	33	22	33
EA667_002325|50S_ribosomal_protein_L36	5606.24	-0.253708	0.0854107	-2.97045	0.00297364	0.0167974	5360	3170	4799	6928	7300	6886	7588	6008	6049	5017	4745	4696
EA667_006330|serine_hydroxymethyltransferase	3188.37	-0.245898	0.0828398	-2.96836	0.00299395	0.0168946	3379	2154	3318	3565	3775	3530	3438	2922	3081	3267	3312	2970
CP039930_1297953_1298157	5.89435	2.73	0.921035	2.96406	0.00303608	0.0171147	11	13	11	8	7	0	2	6	7	4	0	1
EA667_009685|LysR_family_transcriptional_regulator	31.1763	-0.892289	0.301076	-2.96366	0.00303999	0.0171191	36	16	29	25	22	16	38	29	27	49	44	43
EA667_003025|phosphoribosylanthranilate_isomerase	282.279	-0.337435	0.113915	-2.96216	0.00305492	0.0171855	275	206	323	265	279	264	319	299	255	288	306	335
EA667_006020|hypothetical_protein	643.074	0.347232	0.117256	2.96131	0.00306335	0.0172152	665	508	847	638	632	699	875	832	715	426	410	619
EA667_016410|flavodoxin-dependent_(E)-4-hydroxy-3-methylbut-2-enyl-diphosphate_synthase	1381.6	-0.262142	0.0885487	-2.96042	0.00307216	0.017247	1501	990	1441	1470	1559	1508	1492	1231	1239	1497	1476	1333
EA667_016270|iron-containing_redox_enzyme_family_protein	30.7924	0.988954	0.334112	2.95995	0.0030769	0.0172559	33	35	41	42	27	32	44	37	33	18	14	19
EA667_002980|hypothetical_protein	39.55	0.841467	0.284431	2.95842	0.00309221	0.017324	49	43	83	35	43	33	36	42	31	26	23	40
EA667_008355|molybdopterin_oxidoreductase_family_protein	32.1094	-0.885932	0.300093	-2.95219	0.00315524	0.017659	40	17	31	13	19	26	33	33	25	52	47	48
EA667_017170|exonuclease_V_subunit_gamma	215.801	-0.481616	0.163216	-2.95079	0.00316962	0.0177213	166	134	244	240	238	205	273	226	206	161	247	285
EA667_018985|alpha/beta_hydrolase	227.003	0.386196	0.130964	2.94887	0.00318934	0.0178134	276	200	309	252	234	270	248	201	228	169	170	211
EA667_013920|23S_rRNA_(pseudouridine(1915)-N(3))-methyltransferase_RlmH	93.3979	-0.533361	0.180934	-2.94782	0.00320027	0.0178562	74	62	100	98	108	99	100	89	88	105	101	106
EA667_018305|NAD-dependent_malic_enzyme	738.873	-0.39544	0.134231	-2.94597	0.00321944	0.0179449	703	373	610	970	1008	763	1061	920	634	670	653	686
EA667_019380|DUF1427_family_protein	8.62876	2.09136	0.710188	2.9448	0.00323164	0.0179945	16	6	16	13	8	13	15	7	7	3	0	5
EA667_016080|threonine--tRNA_ligase	4623.98	-0.190634	0.0647512	-2.9441	0.00323899	0.0180171	4579	3148	4941	4891	5501	5060	5676	4800	4492	4322	4396	4472
EA667_001600|UDP-N-acetylmuramoyl-tripeptide--D-alanyl-D-_alanine_ligase	505.891	-0.345778	0.117774	-2.93596	0.00332519	0.0184745	482	317	555	541	616	567	607	478	435	579	528	449
EA667_014940|NAD+_synthase	1544.62	0.225032	0.0766535	2.9357	0.00332799	0.0184745	1800	1419	2195	1540	1548	1552	1569	1435	1433	1431	1346	1466
CP039930_2460586_2460830	30.673	0.989564	0.337218	2.93449	0.00334095	0.0185277	28	31	54	22	28	36	49	36	40	17	17	18
CP039930_218929_219304	84.9038	0.676966	0.230748	2.93379	0.00334855	0.018551	147	70	133	55	110	82	96	82	71	83	49	65
EA667_019480|hypothetical_protein	28.5772	1.05696	0.360917	2.92855	0.0034055	0.0188474	32	40	41	36	28	20	37	31	29	24	9	18
EA667_002345|DNA-directed_RNA_polymerase_subunit_alpha	26992.8	-0.233492	0.0797482	-2.92787	0.00341298	0.018866	26442	16235	25464	32631	35276	30283	35263	28381	26872	24965	23961	23894
EA667_004675|2,3,4,5-tetrahydropyridine-2,6-dicarboxylate_N-succinyltransferase	1739.04	-0.244418	0.0834906	-2.92749	0.00341712	0.018866	1828	1206	1871	1890	1995	1792	1900	1634	1687	1804	1834	1652
EA667_011550|carbohydrate_porin	8.73813	1.83889	0.628188	2.9273	0.00341921	0.018866	18	8	18	7	7	7	9	12	11	6	3	2
EA667_008630|amino_acid_permease	14.8496	-1.39664	0.477584	-2.92438	0.0034514	0.0190244	11	3	12	16	6	9	22	15	24	22	20	19
EA667_003845|serine--tRNA_ligase	1342.15	-0.245955	0.0843199	-2.91693	0.00353493	0.0194653	1482	886	1389	1427	1543	1475	1419	1282	1342	1339	1352	1362
EA667_003990|DUF808_domain-containing_protein	515.303	0.316032	0.10839	2.91569	0.00354898	0.019523	612	473	698	547	542	574	536	451	513	488	406	418
EA667_004130|MFS_transporter	424.63	0.359933	0.123784	2.90776	0.00364029	0.0199978	606	350	488	484	486	500	416	373	442	341	314	375
EA667_001710|bacterioferritin	2615.05	0.34953	0.120214	2.90756	0.00364262	0.0199978	2639	2235	3742	2711	2722	2829	3017	3027	2781	1760	1737	2722
EA667_007770|iron-containing_redox_enzyme_family_protein	200.221	0.41583	0.143077	2.90633	0.00365693	0.0200563	233	171	245	209	181	194	271	270	219	166	128	152
EA667_011175|cytochrome_d_ubiquinol_oxidase_subunit_II	203.825	0.425491	0.14662	2.90199	0.00370795	0.0203157	266	186	249	256	253	276	178	158	182	161	127	193
EA667_000840|HPF/RaiA_family_ribosome-associated_protein	4197.09	0.261984	0.0903905	2.89836	0.00375126	0.0205324	4922	3213	4957	4633	4787	5132	4592	4444	4575	3173	2883	3943
EA667_015280|hypothetical_protein	57.7733	0.746776	0.257866	2.89598	0.00377972	0.0206675	61	61	65	73	69	45	86	65	74	29	34	41
EA667_003825|50S_ribosomal_protein_L21	12420.4	-0.196525	0.0678728	-2.89548	0.00378577	0.0206799	11897	8633	12803	13673	15470	13551	15253	13070	11775	11470	11663	11877
CP039930_867952_868010	980.825	-0.315555	0.109015	-2.89461	0.00379625	0.0207165	1045	798	1014	949	1049	1079	813	807	955	1063	1064	1164
CP039930_2046146_2046223	20.1706	1.09927	0.380176	2.89148	0.00383434	0.0209035	38	25	30	18	25	21	14	17	17	11	14	15
TG31307_2_3110726_3110997	15.1229	1.37151	0.474497	2.89046	0.00384676	0.0209503	19	20	25	20	11	14	18	20	14	8	4	11
CP039930_881738_882110	141.657	-0.462521	0.160049	-2.88987	0.00385406	0.0209627	126	116	167	128	150	117	139	115	125	172	187	158
EA667_008310|type_II_3-dehydroquinate_dehydratase	475.273	0.32207	0.111456	2.88965	0.00385671	0.0209627	532	314	500	623	631	530	651	588	493	309	328	343
EA667_006200|acyl-CoA_dehydrogenase	178.259	0.555681	0.192375	2.88853	0.00387047	0.0210153	258	158	290	158	156	228	134	149	206	169	119	146
CP039930_3741681_3741895	166.261	-0.406386	0.140704	-2.88824	0.00387407	0.0210153	171	104	176	169	153	162	194	173	169	173	175	196
EA667_018770|Vi_polysaccharide_biosynthesis_UDP-N-acetylglucosamine_C-6_dehydrogenase_TviB	2643.02	-0.28537	0.0988154	-2.88791	0.00387817	0.0210167	2955	2008	2791	2581	3003	2883	2433	2067	2516	2883	3028	2752
EA667_003190|OmpA_family_protein	39298.7	0.153191	0.0531235	2.88367	0.00393073	0.0212804	42946	29370	46003	44956	46470	44701	46721	41748	39701	31322	30955	34942
EA667_004885|GTPase_ObgE	2243.65	-0.219169	0.0761052	-2.87982	0.00397907	0.0215208	2231	1467	2395	2481	2569	2486	2749	2239	2248	2044	2286	2117
EA667_005690|anthranilate_phosphoribosyltransferase	807.537	-0.269184	0.0934921	-2.87922	0.00398662	0.0215403	872	553	856	844	917	857	921	723	753	810	891	802
EA667_017215|DNA_helicase	244.322	-0.376638	0.130881	-2.87772	0.00400563	0.0216217	223	163	310	263	237	222	262	239	222	278	278	262
EA667_012250|3-hydroxyacyl-CoA_dehydrogenase	50.7894	0.719282	0.250241	2.87435	0.00404854	0.0218318	80	42	64	53	52	55	60	53	60	30	34	39
TG31307_3_363123_363247	20.3039	-1.09183	0.379953	-2.87359	0.00405835	0.0218512	16	15	21	8	17	18	11	17	15	24	40	38
EA667_006685|ShlB/FhaC/HecB_family_hemolysin_secretion/activation_protein	448.602	-0.319051	0.111039	-2.87332	0.00406179	0.0218512	397	248	359	586	613	544	603	529	464	339	377	431
EA667_016290|bifunctional_diguanylate_cyclase/phosphodiesterase	233.58	0.386145	0.134398	2.87314	0.00406413	0.0218512	272	190	265	296	277	242	291	278	233	157	160	194
EA667_018630|hypothetical_protein	40.4141	0.820978	0.286154	2.86901	0.0041176	0.0221107	56	31	66	47	48	42	42	50	38	34	19	25
EA667_009015|3-oxoadipyl-CoA_thiolase	27.5151	-1.00083	0.348868	-2.86879	0.00412048	0.0221107	25	18	22	31	30	24	18	12	28	49	42	28
EA667_015335|iron-sulfur_cluster_carrier_protein_ApbC	403.836	0.31548	0.11004	2.86696	0.00414438	0.0222171	479	329	627	384	392	443	461	400	374	342	331	371
EA667_008280|hypothetical_protein	21.0204	-1.07822	0.376798	-2.86153	0.00421598	0.0225788	21	11	21	14	18	13	17	21	14	20	34	48
CP039930_895424_895818	149.426	0.542552	0.189711	2.85989	0.00423787	0.0226526	173	129	228	146	145	166	172	147	189	75	100	158
CP039933_4572_5113	1903.88	-0.25677	0.0897836	-2.85988	0.00423804	0.0226526	1868	1314	2273	1922	1917	1900	2286	2112	1613	1886	1831	2215
EA667_012445|phage_head_morphogenesis_protein	75.2514	0.614622	0.215022	2.85842	0.00425762	0.022735	98	69	137	72	75	82	66	59	82	47	61	72
EA667_014410|GTP-binding_protein	55.3606	-0.712754	0.249488	-2.85686	0.00427848	0.0228241	43	32	54	44	62	66	83	54	42	57	63	73
CP039932_31499_31566	14.6655	1.33235	0.466975	2.85314	0.00432891	0.02304	19	18	26	19	24	14	15	12	10	9	6	8
CP039930_429564_429973	1172.31	-0.752416	0.263716	-2.85313	0.00432914	0.02304	716	884	1250	994	916	735	1821	1405	886	1295	1590	1591
EA667_009185|primary-amine_oxidase	15.6526	-1.32814	0.465533	-2.85295	0.00433159	0.02304	12	3	21	21	8	8	16	11	10	24	30	25
EA667_000815|ion_channel_protein_Tsx	250.094	-0.454313	0.159308	-2.8518	0.00434726	0.0231009	204	107	182	330	382	292	406	325	238	216	208	187
EA667_007030|circularly_permuted_type_2_ATP-grasp_protein	123.49	0.467637	0.164342	2.84552	0.00443393	0.0235386	159	96	182	125	123	120	138	143	138	100	91	95
TG31307_3_35917_36963	9.61538	-1.46094	0.513601	-2.84451	0.00444797	0.0235902	8	6	9	7	8	4	4	4	5	18	18	22
TG31307_2_2975235_2975345	61.9562	0.634815	0.223236	2.84369	0.00445943	0.0236054	80	68	95	64	61	47	72	59	62	39	52	53
EA667_004205|lytic_transglycosylase_domain-containing_protein	56.3054	-0.710801	0.249957	-2.84369	0.00445947	0.0236054	55	21	52	55	78	54	79	59	48	62	62	64
CP039930_2301382_2301596	45.5866	0.744523	0.261897	2.84281	0.00447175	0.0236475	63	44	77	47	45	47	37	44	52	26	36	38
EA667_001400|1-(5-phosphoribosyl)-5-((5-_phosphoribosylamino)methylideneamino)imidazole-4-_carboxamide_isomerase	399.874	-0.328291	0.115494	-2.8425	0.00447615	0.0236479	425	226	444	422	475	453	471	373	351	393	436	409
EA667_001200|NAD-dependent_succinate-semialdehyde_dehydrogenase	1629.67	0.270721	0.0952581	2.84198	0.00448344	0.0236636	1906	1081	1913	1989	1896	1784	2361	1756	1669	1174	1224	1272
EA667_011825|3-hydroxyacyl-CoA_dehydrogenase	2516.46	0.543809	0.191388	2.84139	0.00449174	0.0236845	3350	2159	2951	2701	3513	3834	2187	1932	2789	1806	1786	1729
CP039930_316397_316513	410.109	-0.303833	0.107211	-2.83398	0.00459717	0.0241845	389	244	376	504	489	523	494	433	412	394	372	369
EA667_006360|ABC_transporter_permease_subunit	6.83839	-2.03165	0.716895	-2.83396	0.0045975	0.0241845	6	0	4	2	5	9	7	7	6	10	16	10
EA667_018605|sel1_repeat_family_protein	32.2617	0.886037	0.312668	2.8338	0.00459984	0.0241845	46	31	59	31	31	43	35	27	27	20	15	32
CP039930_3198984_3199061	450.092	0.321938	0.113644	2.83286	0.00461336	0.0242323	606	455	637	404	430	463	421	356	421	435	429	382
EA667_007000|DNA-binding_transcriptional_regulator_Fis	2063.41	-0.217475	0.0769573	-2.82591	0.00471459	0.0247403	2129	1547	2192	2177	2425	2190	2225	1980	1873	2124	2109	2026
EA667_013155|aldehyde_dehydrogenase	59.9326	0.671849	0.237867	2.82447	0.00473588	0.0248231	80	58	89	69	52	57	66	54	74	39	53	38
EA667_009070|hypothetical_protein	206.331	-0.378847	0.134153	-2.82399	0.00474306	0.0248231	212	145	217	198	219	241	216	185	182	209	207	268
CP039930_1970460_1970668	14.5767	-1.35216	0.478875	-2.82362	0.00474842	0.0248231	10	8	11	21	11	11	15	5	14	14	29	25
TG31307_2_3247210_3248591	33.463	0.841667	0.298081	2.82362	0.00474854	0.0248231	43	42	55	30	33	27	31	37	34	25	26	21
EA667_004620|phosphoribosylformylglycinamidine_synthase	7081.26	-0.23875	0.0847065	-2.81855	0.00482406	0.0251938	7568	5633	8299	6737	7943	7350	6884	5503	6352	7730	8065	7448
EA667_002825|bifunctional_phosphopantothenoylcysteine_decarboxylase/phosphopantothenate--cysteine_ligase_CoaBC	316.062	-0.338295	0.120049	-2.81799	0.00483259	0.0252143	334	191	334	313	361	379	357	282	310	300	323	363
CP039930_1748802_1748923	21.381	-1.04215	0.369915	-2.81726	0.00484352	0.0252401	21	14	14	16	17	19	26	19	16	39	24	30
EA667_018635|hypothetical_protein	392.125	0.300347	0.106618	2.81705	0.00484677	0.0252401	459	342	451	397	444	423	468	440	409	306	304	326
CP039930_1714903_1715050	4.61758	-2.53919	0.901665	-2.81611	0.00486093	NA	1	2	2	3	3	4	2	5	5	4	12	11
CP039930_3499780_3499942	11.3447	1.53925	0.546642	2.81583	0.00486513	0.0253116	21	12	21	14	13	16	13	8	6	4	2	11
CP039930_3484591_3485325	74.85	0.581067	0.20656	2.81307	0.00490711	0.0255058	104	68	135	74	63	75	73	64	73	49	62	75
EA667_007170|peptide_chain_release_factor_1	568.952	-0.265382	0.0944892	-2.8086	0.00497579	0.0258382	576	399	637	578	672	630	577	519	545	605	577	584
EA667_004770|GTPase_Era	1399.79	-0.237944	0.0848507	-2.80427	0.0050431	0.0261629	1297	994	1636	1460	1566	1460	1636	1425	1301	1338	1503	1379
TG31307_3_273636_273781	3.68128	-2.80683	1.00186	-2.80163	0.00508457	NA	0	3	1	2	2	0	4	2	1	8	10	9
EA667_018935|lipoprotein_signal_peptidase	484.53	-0.299655	0.107004	-2.80041	0.00510385	0.0264529	539	321	507	454	577	496	555	435	467	491	492	550
EA667_012290|EAL_domain-containing_protein	44.4283	0.754691	0.269725	2.798	0.00514208	0.0266258	63	28	75	50	50	47	51	48	50	28	28	32
CP039930_182657_182717	427.954	-0.300477	0.107446	-2.79654	0.00516532	0.0267209	475	322	482	370	490	411	426	378	376	468	496	475
EA667_017395|excinuclease_ABC_subunit_UvrC	283.176	-0.36107	0.129229	-2.79403	0.0052056	0.0269038	326	189	377	242	234	248	281	247	248	309	300	428
EA667_001460|two-component_system_response_regulator_OmpR	1067.92	0.267442	0.0957829	2.79217	0.00523558	0.0270332	1295	739	1497	1132	1075	1147	1342	1109	1118	870	805	963
EA667_015945|type_II_secretion_system_protein_GspE	173.207	-0.396601	0.142057	-2.79184	0.00524088	0.027035	176	106	181	171	180	196	197	167	175	176	167	212
EA667_012405|cysteine--tRNA_ligase	532.908	-0.294051	0.105376	-2.79051	0.00526255	0.0271095	506	377	582	594	568	577	558	486	563	574	548	518
EA667_002690|1-acyl-sn-glycerol-3-phosphate_acyltransferase	220.047	-0.36243	0.129895	-2.79017	0.00526803	0.0271095	189	160	227	240	263	236	229	234	205	221	226	233
EA667_009030|MFS_transporter	20.032	-1.08723	0.389684	-2.79004	0.00527019	0.0271095	15	14	14	26	20	17	23	11	15	22	27	36
EA667_008060|hypothetical_protein	60.2195	0.64507	0.231373	2.788	0.0053034	0.0272319	84	57	79	52	75	61	65	67	65	48	35	46
EA667_013085|SDR_family_oxidoreductase	31.4061	-0.813463	0.291776	-2.78797	0.00530395	0.0272319	31	20	32	27	28	22	28	28	27	38	49	46
EA667_004820|GFA_family_protein	48.1202	0.747443	0.268228	2.7866	0.00532644	0.0273218	58	42	66	54	46	59	74	48	53	36	32	22
EA667_006995|bifunctional_phosphoribosylaminoimidazolecarboxamide_formyltransferase/IMP_cyclohydrolase	2873.69	-0.231484	0.0831047	-2.78545	0.00534541	0.0273933	2999	2071	3081	3082	3567	3140	3116	2403	2663	3010	2911	2826
CP039930_291218_291873	152.566	0.431894	0.155154	2.78364	0.00537533	0.0275209	211	128	187	148	165	169	178	170	149	133	105	118
EA667_000050|hypothetical_protein	103.87	0.484616	0.174449	2.77797	0.00546993	0.027979	141	85	138	118	111	110	117	105	108	73	78	86
TG31307_3_321094_321309	38.5286	-0.803689	0.28943	-2.7768	0.00548966	0.0280537	37	22	36	36	40	48	27	44	23	57	41	53
EA667_004335|amino_acid_permease	689.71	0.253136	0.0912402	2.77439	0.00553055	0.0282363	738	503	796	842	803	764	859	775	793	520	525	513
EA667_009545|AraC_family_transcriptional_regulator	6.40639	-1.91713	0.691346	-2.77304	0.00555349	0.028327	3	4	5	4	1	4	7	4	1	17	8	17
EA667_008225|hypothetical_protein	2.81302	-4.0974	1.47851	-2.77131	0.00558308	NA	0	1	0	1	1	0	0	8	4	7	6	4
CP039930_2375073_2375315	43.4575	0.808322	0.292031	2.76794	0.00564123	0.0287477	46	40	64	59	56	61	53	49	28	32	29	17
CP039930_2206788_2206957	938.054	-0.247107	0.0893221	-2.76647	0.00566665	0.028843	956	642	953	988	1191	1003	1071	982	847	882	937	950
EA667_009355|hypothetical_protein	17.2008	-1.1278	0.4077	-2.76625	0.0056705	0.028843	13	11	17	12	19	8	17	12	14	33	20	29
CP039930_2378457_2378625	196.455	0.435125	0.157392	2.76459	0.00569939	0.0289631	230	122	276	214	229	166	277	257	233	144	117	156
CP039930_658871_659051	88.9862	0.55553	0.201062	2.76298	0.00572761	0.0290795	110	95	140	104	81	104	71	82	76	69	84	62
EA667_015400|hypothetical_protein	224.45	-0.368889	0.133533	-2.76252	0.00573574	0.0290937	228	179	224	223	275	215	224	186	200	232	254	266
TG31307_2_3378379_3378630	52.1727	0.675748	0.244706	2.76147	0.00575415	0.0291385	59	56	83	48	58	56	54	61	46	35	35	44
EA667_007400|glutamine--tRNA_ligase/YqeY_domain_fusion_protein	1616.06	-0.216049	0.0782386	-2.76141	0.00575523	0.0291385	1678	1128	1853	1650	1825	1764	1705	1501	1588	1704	1606	1610
EA667_004610|Holliday_junction_branch_migration_protein_RuvA	246.44	-0.364315	0.13198	-2.76039	0.00577328	0.0292029	246	148	294	257	288	259	251	212	241	295	244	260
CP039930_1983292_1984338	10.2096	-1.54079	0.558249	-2.76005	0.00577934	0.0292065	6	7	7	13	9	4	8	2	10	16	21	17
EA667_006640|tRNA_(adenosine(37)-N6)-threonylcarbamoyltransferase_complex_transferase_subunit_TsaD	327.709	-0.3206	0.116191	-2.75926	0.00579327	0.0292499	319	222	362	351	379	402	329	263	322	335	320	374
EA667_000430|aminoglycoside_N-acetyltransferase_AAC(6')-Ian	2605.26	-0.212945	0.0772054	-2.75816	0.0058128	0.029308	2405	1585	2789	2958	2916	2829	3504	2941	2756	2157	2288	2693
CP039930_3277589_3278307	5526.01	-0.243975	0.0884674	-2.7578	0.00581922	0.029308	5403	4142	5056	6381	6732	5966	6214	5958	5049	5256	5327	5468
EA667_009140|acyl-CoA_dehydrogenase	12.6324	1.98165	0.718587	2.75771	0.00582087	0.029308	18	7	5	23	14	17	32	18	17	1	3	3
EA667_019775|hypothetical_protein	151.17	0.450818	0.163728	2.75346	0.00589692	0.0296636	148	117	223	189	155	162	199	167	170	113	97	114
TG31307_2_3249020_3249106	26.7566	0.950122	0.345287	2.75168	0.00592898	0.0297975	39	38	43	21	26	27	28	15	28	20	12	26
EA667_018825|ribonuclease_PH	317.358	-0.324174	0.117892	-2.74974	0.00596427	0.0299473	315	210	297	349	395	359	375	304	309	330	315	296
EA667_003450|patatin-like_phospholipase_family_protein	175.08	0.44256	0.161197	2.74546	0.00604264	0.030313	260	141	296	185	132	172	199	150	148	139	140	183
CP039930_1451603_1451678	96.6444	0.508317	0.185169	2.74515	0.00604839	0.030314	107	100	141	108	103	88	108	94	99	77	74	74
EA667_010385|YARHG_domain-containing_protein	621.529	0.273705	0.0998215	2.74194	0.00610766	0.030583	681	543	827	665	644	681	705	652	610	498	453	608
EA667_000405|aminoglycoside_O-phosphotransferase_APH(3')-Ia	685.697	-0.261498	0.0954404	-2.73991	0.00614562	0.030745	734	420	696	809	857	755	769	656	647	622	686	706
TG31307_2_154963_155183	49.1524	0.799516	0.291896	2.73904	0.00616185	0.030798	47	43	74	67	57	32	67	78	52	23	33	30
EA667_019015|molecular_chaperone_DnaK	11753.1	-0.200848	0.0734012	-2.7363	0.0062135	0.0310278	13034	9045	14472	11085	11372	11900	11516	10259	11093	12132	11795	14476
EA667_008335|nitrite_reductase_large_subunit	7.28597	-1.88894	0.69134	-2.73228	0.00628971	0.0313797	9	1	2	4	2	10	8	6	5	11	14	15
EA667_004925|UDP-N-acetylglucosamine_2-epimerase_(non-hydrolyzing)	238.299	0.363979	0.133296	2.7306	0.00632192	0.0315116	262	218	358	236	255	269	227	233	245	194	192	209
CP039930_301572_301950	736.239	0.392	0.143646	2.72892	0.00635419	0.0316436	646	570	969	888	808	730	1081	1011	800	408	438	685
EA667_008395|DMT_family_transporter	32.198	-0.800478	0.293543	-2.72695	0.00639222	0.031804	25	24	48	18	22	20	26	24	23	60	47	46
EA667_006235|30S_ribosomal_protein_S2	12672.8	-0.231026	0.0847323	-2.72654	0.00640017	0.0318147	12209	8076	11759	15165	15617	13140	17506	14269	12387	11416	11334	11675
CP039930_2197650_2197886	81.1016	0.599196	0.220215	2.72096	0.00650931	0.0323278	92	85	158	84	94	77	74	63	62	44	69	89
CP039930_3120362_3120552	463.85	0.286228	0.105239	2.71978	0.00653255	0.0324138	528	429	588	479	534	496	466	494	448	376	370	422
CP039930_493636_493708	103.211	0.492125	0.180992	2.71905	0.00654704	0.0324562	127	126	173	86	103	88	88	79	94	84	90	106
CP039930_977906_977977	60.5824	-0.606961	0.223307	-2.71805	0.00656678	0.0325246	52	40	55	65	55	58	73	64	63	75	67	63
TG31307_2_2830947_2831027	110.913	0.483745	0.178008	2.71754	0.00657689	0.0325452	148	125	162	93	99	127	109	94	96	82	108	97
EA667_019455|helix-turn-helix_domain-containing_protein	58.9545	0.671548	0.247319	2.71531	0.0066213	0.0327353	65	50	99	52	50	58	101	76	53	36	36	50
TG31307_2_3352737_3352909	3.14376	3.80309	1.40062	2.71529	0.00662187	NA	8	2	7	6	3	5	2	4	2	0	0	1
EA667_004550|RNA_polymerase_sigma_factor	2571.96	0.234136	0.0862403	2.71493	0.00662899	0.0327437	2746	2042	3591	2763	2554	2794	3094	2820	2512	2078	1965	2442
EA667_007780|helix-turn-helix_domain-containing_protein	9.3763	1.81736	0.669623	2.714	0.00664753	0.0328057	11	11	12	16	10	16	9	13	8	1	3	5
EA667_000935|cell_division_protein_FtsZ	4142.04	-0.196869	0.0725491	-2.71359	0.00665576	0.0328167	4568	3041	5030	4047	4407	4139	4119	3617	4033	4404	4284	4482
EA667_003520|ribonuclease_G	344.806	-0.30823	0.113642	-2.7123	0.00668179	0.0329153	341	211	372	366	434	355	392	332	356	358	327	353
EA667_001670|glutamate_synthase_small_subunit	742.854	-0.259605	0.0957668	-2.71081	0.00671192	0.033034	690	501	920	743	783	817	882	690	715	739	768	784
TG31307_3_310047_310098	4.83577	-2.41835	0.892463	-2.70974	0.00673352	NA	0	1	5	3	3	2	5	6	4	4	7	18
EA667_010245|lipoyl_synthase	145.609	0.493158	0.18212	2.70787	0.00677165	0.0332772	142	80	159	204	176	145	244	229	177	78	92	74
EA667_019890|conjugal_transfer_protein_TraA	3014.16	0.233284	0.0861533	2.70778	0.0067735	0.0332772	3532	2417	4384	2844	2740	2958	3592	3392	2920	2487	2412	3081
CP039930_46351_46465	95.4786	-0.519997	0.192201	-2.70548	0.00682056	0.0334783	90	69	91	94	109	98	74	109	85	106	102	122
TG31307_2_3623120_3623445	19.2468	1.15724	0.427863	2.70471	0.00683648	0.0335263	29	21	17	22	19	18	28	28	24	8	10	10
CP039930_1782633_1782879	8.76723	-1.68671	0.623878	-2.70359	0.00685946	0.0336089	8	3	3	5	8	11	7	6	12	12	19	10
EA667_002630|hypothetical_protein	609.943	0.28226	0.104426	2.70296	0.00687255	0.0336429	733	571	789	608	710	637	562	600	599	535	481	570
EA667_019755|TIGR02594_family_protein	91.331	0.550675	0.203802	2.702	0.00689228	0.0336976	108	77	118	109	108	95	126	97	93	44	58	88
EA667_004300|FdhF/YdeP_family_oxidoreductase	851.602	0.239935	0.0888047	2.70182	0.00689606	0.0336976	1077	696	1195	863	808	864	900	815	865	707	734	844
CP039930_96708_96769	29.8178	0.966557	0.358578	2.69553	0.00702763	0.0343099	27	27	42	26	42	29	55	31	43	11	20	14
EA667_009600|hypothetical_protein	6.76392	-1.82271	0.677074	-2.69203	0.00710178	0.034641	2	2	8	4	6	5	6	8	2	13	10	15
EA667_014005|urease_subunit_beta	58.8288	-0.62655	0.233091	-2.688	0.00718805	0.0350305	53	25	71	50	53	49	68	73	67	61	72	73
EA667_005995|hypothetical_protein	16.115	1.29891	0.483648	2.68566	0.00723865	0.0352457	23	9	29	24	18	17	24	23	13	11	4	7
CP039930_1579707_1579895	5.39711	2.35834	0.878233	2.68532	0.00724594	0.0352498	13	15	3	3	3	6	2	6	5	2	2	2
CP039930_1298985_1299194	960.626	-0.277708	0.103486	-2.68355	0.00728454	0.0354061	946	548	973	1095	1192	1037	1359	1007	889	847	922	936
EA667_005175|phosphate_ABC_transporter_permease_PstA	79.2403	-0.582348	0.217069	-2.68277	0.00730143	0.0354282	82	37	78	119	85	74	88	70	67	84	84	98
EA667_012080|hypothetical_protein	64.9252	0.666103	0.248332	2.68231	0.00731156	0.0354282	84	54	96	80	65	56	94	77	58	58	26	50
EA667_004125|hypothetical_protein	242.179	0.329663	0.122907	2.68223	0.00731334	0.0354282	302	196	302	248	271	262	284	268	241	201	180	200
EA667_010185|homoserine_dehydrogenase	102.682	0.514602	0.191871	2.68203	0.0073177	0.0354282	119	81	114	171	203	173	72	57	73	61	80	60
CP039930_3820785_3820904	77.0649	0.613499	0.228776	2.68166	0.00732588	0.0354282	92	80	77	84	107	120	69	83	72	44	54	54
CP039930_3793973_3794166	11.3462	1.50524	0.56133	2.68156	0.00732796	0.0354282	23	9	18	10	12	12	14	12	15	3	2	11
EA667_008615|GNAT_family_N-acetyltransferase	42.6067	-0.679908	0.253979	-2.67702	0.00742805	0.0358804	39	35	53	25	32	32	34	38	33	59	52	76
EA667_012440|MFS_transporter	22.2611	1.08409	0.405249	2.67511	0.00747055	0.0360538	37	30	34	25	20	19	9	20	29	19	15	10
CP039930_3928246_3928579	39361	-0.242925	0.090827	-2.67459	0.00748197	0.0360771	42508	28986	36310	44576	46937	43244	41521	37419	37293	39240	40962	37480
TG31307_2_203004_203244	344.363	0.394801	0.147685	2.67327	0.00751153	0.0361877	408	331	592	314	266	323	343	346	338	255	261	410
CP039930_3081124_3081324	2644.06	-0.214194	0.0801598	-2.67209	0.00753814	0.0362839	2623	2014	2599	3002	3084	2912	3082	2523	2449	2537	2586	2638
CP039930_501751_501808	125.943	-0.423753	0.158626	-2.67139	0.00755367	0.0363267	142	91	126	123	115	134	124	114	108	144	143	154
CP039930_3923852_3923985	2.40611	4.11759	1.54187	2.67052	0.00757343	NA	4	4	2	7	1	0	3	5	3	0	0	0
EA667_016190|NAD(P)(+)_transhydrogenase_(Re/Si-specific)_subunit_beta	308.383	0.644333	0.241301	2.67024	0.00757963	0.0364195	500	305	480	285	351	427	236	152	276	278	255	212
EA667_004060|DOMON-like_domain-containing_protein	448.414	-0.275687	0.103269	-2.66959	0.00759445	0.0364587	431	320	481	507	518	427	517	426	446	433	449	484
EA667_011435|damage-inducible_protein_CinA	6.43735	1.87925	0.704191	2.66866	0.0076154	0.0365272	14	10	12	5	8	4	4	6	6	3	4	2
EA667_006290|NADPH-dependent_7-cyano-7-deazaguanine_reductase_QueF	397.189	-0.280559	0.105177	-2.6675	0.00764186	0.0365996	414	271	408	447	430	469	436	365	368	401	409	402
EA667_004260|hypothetical_protein	39.8292	0.776857	0.29124	2.66741	0.00764388	0.0365996	54	30	52	47	46	48	47	55	39	18	31	23
EA667_013960|hypothetical_protein	718.112	-0.229549	0.0860881	-2.66644	0.00766588	0.0366645	699	461	783	797	855	830	804	707	737	694	650	728
EA667_006225|OmpW_family_protein	209.142	0.37128	0.139253	2.66622	0.00767084	0.0366645	285	207	293	194	193	227	179	201	195	197	165	195
CP039930_2644250_2644360	52.6869	0.756661	0.283868	2.66554	0.00768648	0.0366872	76	31	107	67	46	66	65	41	46	34	28	50
CP039930_1810595_1810784	71.3614	-0.562015	0.210853	-2.66543	0.00768903	0.0366872	64	64	88	58	46	66	60	50	60	106	84	104
EA667_013090|alpha/beta_hydrolase	14.0672	-1.37042	0.514777	-2.66216	0.00776403	0.0370108	5	5	13	17	16	11	12	15	22	19	9	26
EA667_009230|muconolactone_Delta-isomerase	40.2728	-0.765006	0.287392	-2.66189	0.00777037	0.0370108	42	14	48	47	35	34	36	38	38	61	43	53
EA667_009590|GH3_auxin-responsive_promoter_family_protein	7.70315	-1.76179	0.662373	-2.65982	0.00781828	0.0372066	11	0	3	7	3	4	6	8	8	12	15	15
CP039930_1244643_1244739	5.42931	2.35576	0.886259	2.65809	0.00785847	0.0373653	6	11	10	7	6	1	7	6	6	3	1	1
EA667_016380|protein-export_chaperone_SecB	2441.86	-0.198149	0.0747226	-2.65179	0.00800661	0.0380366	2575	1886	3113	2275	2266	2370	2462	2410	2247	2468	2534	2931
EA667_014205|hypothetical_protein	392.351	0.297908	0.112366	2.65123	0.00801981	0.0380663	446	265	457	527	471	490	506	417	380	268	280	315
EA667_011095|phosphatidylcholine--retinol_O-acyltransferase	81.7171	0.543488	0.205082	2.65009	0.00804695	0.0381387	100	96	119	88	95	82	78	65	66	51	62	88
TG31307_2_3397330_3397453	49.9393	0.719431	0.271483	2.65001	0.00804903	0.0381387	56	46	51	69	58	56	83	61	46	26	31	29
EA667_013600|helix-turn-helix_domain-containing_protein	278.07	0.352366	0.133045	2.64847	0.00808566	0.0382791	347	243	441	265	256	274	297	314	220	245	208	281
EA667_001855|hypothetical_protein	101.333	0.498464	0.188253	2.64784	0.00810077	0.0382953	105	81	156	120	120	108	110	121	102	65	68	87
EA667_007050|alanine_racemase	250.695	-0.361938	0.136697	-2.64774	0.00810308	0.0382953	255	208	270	243	232	256	241	195	242	297	309	261
EA667_002105|lipid_asymmetry_maintenance_ABC_transporter_permease_subunit_MlaE	433.753	-0.259031	0.0978472	-2.64731	0.00811361	0.0383119	442	290	465	513	512	488	464	395	399	415	433	458
EA667_014555|type_I_restriction_endonuclease_subunit_R	235.176	0.356479	0.134681	2.64685	0.00812454	0.0383149	329	173	310	273	267	253	286	224	196	184	187	203
TG31307_2_72869_73167	83.2157	0.567203	0.214306	2.6467	0.00812826	0.0383149	134	70	117	92	69	103	80	93	63	58	60	79
EA667_011125|hypothetical_protein	236.407	0.411808	0.155864	2.6421	0.00823949	0.0388058	227	164	265	259	258	262	377	383	260	124	130	198
EA667_006115|alpha/beta_hydrolase	381.836	0.30294	0.114762	2.63974	0.008297	0.039043	436	259	410	423	415	457	515	481	466	243	262	312
TG31307_3_49587_49795	14.8726	-1.09104	0.414027	-2.6352	0.00840886	0.0395354	14	8	17	10	13	12	8	10	10	25	27	23
CP039930_2509271_2509366	4.2675	2.82316	1.07169	2.6343	0.00843115	NA	8	7	8	2	0	4	9	8	3	2	1	0
CP039930_3609722_3609824	231.565	0.36371	0.138153	2.63266	0.00847197	0.0397451	264	230	300	243	232	261	231	264	210	179	195	196
EA667_014055|hypothetical_protein	221.774	-0.349725	0.132847	-2.63255	0.00847478	0.0397451	203	148	231	225	220	243	260	272	209	226	229	222
TG31307_3_306489_306732	6.33321	-1.96252	0.745554	-2.6323	0.00848093	0.0397451	3	2	4	7	10	4	4	7	3	4	14	14
EA667_015310|dCTP_deaminase	823.304	-0.213375	0.0810624	-2.63223	0.00848255	0.0397451	838	567	980	848	932	880	897	790	762	802	823	889
EA667_013405|DNA_polymerase_III_subunit_epsilon	345.853	-0.288488	0.109721	-2.62928	0.00855661	0.0400578	351	253	368	346	392	370	397	297	329	359	344	385
EA667_009295|type_1_glutamine_amidotransferase_domain-containing_protein	30.7171	-0.862293	0.328293	-2.6266	0.00862435	0.0403404	34	14	34	32	29	27	24	21	22	58	24	52
CP039930_1809381_1809488	54.5775	-0.603394	0.229758	-2.62621	0.00863403	0.0403512	53	43	70	45	44	47	32	48	39	77	80	73
CP039930_1448197_1448437	257.398	0.37637	0.143329	2.62591	0.00864181	0.0403531	350	243	384	237	210	247	245	282	237	181	216	293
EA667_008650|DUF159_family_protein	100.083	0.523223	0.19949	2.62281	0.00872083	0.0406873	123	117	175	75	90	96	112	78	81	71	74	122
EA667_006495|bifunctional_prephenate_dehydrogenase/3-phosphoshikimate_1-carboxyvinyltransferase	1108.47	-0.243475	0.0929092	-2.62057	0.00877817	0.0409199	1222	808	1293	1068	1291	1195	1031	930	1002	1194	1257	1126
TG31307_2_2989604_2989817	66.1014	0.66703	0.254631	2.61959	0.00880345	0.0410028	105	49	73	80	87	65	54	88	78	41	43	46
EA667_013255|gamma-aminobutyraldehyde_dehydrogenase	245.232	-0.374368	0.142966	-2.61858	0.00882977	0.0410904	179	144	238	315	288	245	361	308	252	192	238	234
EA667_004765|ribonuclease_III	281.432	-0.326465	0.124773	-2.61648	0.00888413	0.0413082	246	195	303	287	329	279	359	313	254	255	277	323
CP039930_3100837_3100972	32.8061	0.811335	0.310183	2.61567	0.00890537	0.0413718	41	32	56	26	25	31	51	44	29	26	16	25
EA667_004605|Holliday_junction_branch_migration_DNA_helicase_RuvB	185.701	-0.375596	0.143618	-2.61524	0.00891658	0.0413887	165	107	225	204	191	200	219	174	194	185	198	199
EA667_006795|hypothetical_protein	10.9512	1.53282	0.586376	2.61405	0.00894748	0.0414969	24	8	13	14	21	11	10	9	12	7	4	3
EA667_002290|30S_ribosomal_protein_S8	8260.92	-0.215198	0.0823668	-2.61268	0.00898351	0.0416125	7843	5627	7913	9471	10396	8992	10675	8469	8357	8016	7507	7256
EA667_006075|hypothetical_protein	16.6839	1.34855	0.516186	2.61252	0.00898764	0.0416125	11	22	21	23	15	20	19	22	28	12	4	4
CP039930_3753088_3753578	5195.96	-0.249926	0.0956805	-2.61209	0.00899912	0.0416304	4999	4021	4737	6100	6289	5365	5653	5610	4839	5000	5057	5182
EA667_014920|beta-ketoacyl-ACP_synthase_II	2830.88	0.322072	0.12334	2.61124	0.00902136	0.041698	3286	1614	2578	3989	4078	3452	4341	3506	2723	1848	1723	1837
CP039930_1197842_1197922	1235.4	0.256027	0.0982222	2.60661	0.00914447	0.0422314	1658	958	1423	1299	1479	1457	1297	1192	1222	1078	937	1069
CP039930_187671_187921	71.859	0.569519	0.218543	2.60598	0.00916111	0.0422512	109	62	98	63	80	77	98	55	73	59	49	57
CP039930_701483_701672	23.1835	0.970115	0.372281	2.60587	0.00916422	0.0422512	34	26	29	21	21	21	37	20	31	17	11	14
EA667_004815|PaaI_family_thioesterase	61.4025	0.596764	0.229075	2.60511	0.00918453	0.0423092	80	45	78	76	75	72	82	59	67	36	41	45
EA667_000260|HIT_family_protein	326.7	0.333621	0.128294	2.60045	0.00931021	0.0428521	394	318	365	369	369	340	342	320	346	259	235	301
EA667_004475|phosphoribosylformylglycinamidine_cyclo-ligase	1552.83	-0.259884	0.0999888	-2.59913	0.00934593	0.0429689	1655	1014	1521	1801	2021	1699	1777	1436	1400	1602	1585	1377
CP039930_540578_541117	5077.33	-0.232968	0.0896397	-2.59894	0.00935132	0.0429689	4906	3894	4753	5892	6146	5338	5633	5423	4689	4969	4836	4992
EA667_001905|hypothetical_protein	124.307	0.535757	0.206279	2.59724	0.00939751	0.0431325	165	90	217	131	109	141	115	163	106	86	79	127
EA667_002830|protein_translocase_subunit_SecF	723.485	-0.255968	0.0985608	-2.59705	0.0094027	0.0431325	681	428	670	859	902	850	1004	783	728	690	614	630
EA667_017805|riboflavin_synthase	307.978	-0.354677	0.136789	-2.59288	0.00951755	0.0435727	296	181	371	275	332	395	352	315	259	298	337	342
EA667_008600|hypothetical_protein	15.1414	-1.16591	0.449674	-2.59279	0.00952003	0.0435727	10	9	12	18	16	8	13	19	12	16	24	24
CP039930_1452545_1452793	168.91	0.374534	0.144457	2.5927	0.00952257	0.0435727	186	159	225	184	204	188	193	153	160	141	126	137
CP039930_3919946_3920007	396.774	-0.269981	0.104226	-2.59034	0.00958809	0.0438214	406	236	419	447	458	455	461	398	397	376	366	419
EA667_007285|hypothetical_protein	378.25	0.281579	0.108731	2.58969	0.00960622	0.0438214	429	346	483	397	378	414	429	378	386	326	295	331
TG31307_2_3505305_3505541	247.771	0.352953	0.136296	2.5896	0.00960877	0.0438214	319	203	394	245	210	267	251	228	257	196	208	245
TG31307_2_3458039_3458408	176.407	0.412817	0.159414	2.58959	0.00960896	0.0438214	263	172	221	165	167	188	147	168	189	143	156	154
CP039930_3375930_3375997	79.4068	-0.525384	0.203101	-2.58681	0.00968685	0.0441397	81	37	89	80	82	71	100	79	81	76	93	99
CP039930_57500_57685	243.706	0.37773	0.146083	2.58572	0.0097175	0.0442426	319	261	258	243	249	254	270	230	253	201	193	209
CP039930_1111941_1112107	181.011	0.432456	0.167362	2.58395	0.00976749	0.0444006	213	135	256	217	219	200	161	238	173	145	115	145
EA667_015150|50S_ribosomal_protein_L32	5189.65	-0.181882	0.0703899	-2.58392	0.00976845	0.0444006	5282	3717	5394	5670	6019	5506	6127	5413	4940	4913	5134	4910
EA667_018735|glycosyltransferase	501.034	-0.296983	0.114979	-2.58294	0.00979626	0.04449	489	366	454	592	566	557	592	519	450	515	517	450
EA667_001895|ParA_family_protein	308.616	0.336722	0.130428	2.58167	0.00983241	0.0446171	323	238	419	351	335	317	402	375	313	222	193	293
TG31307_3_175684_175754	9.33148	-1.50999	0.585113	-2.58068	0.00986057	0.0447078	6	5	7	12	7	7	1	10	8	17	14	16
CP039930_1013982_1014131	460.716	0.3264	0.126555	2.57911	0.00990541	0.0448739	504	440	660	509	584	473	405	413	430	416	412	344
EA667_019470|tRNA_epoxyqueuosine(34)_reductase_QueG	101.478	0.478581	0.185607	2.57846	0.00992428	0.0449222	129	76	131	129	110	93	137	118	103	71	73	75
EA667_009275|acetoacetate_decarboxylase	19.6746	-1.01744	0.394896	-2.57648	0.00998106	0.0451418	18	16	15	16	21	23	17	9	7	23	24	46
EA667_008350|molybdenum_cofactor_guanylyltransferase	20.8064	-1.07185	0.416202	-2.57531	0.0100149	0.0452575	14	12	21	12	14	27	19	16	24	19	23	49
EA667_001570|DUF4179_domain-containing_protein	1106.59	-0.198887	0.0772456	-2.57474	0.0100316	0.0452954	1036	723	1084	1303	1288	1259	1359	1281	1158	964	981	1041
EA667_009550|sulfite_exporter_TauE/SafE_family_protein	1.83048	-3.91988	1.52251	-2.57462	0.0100349	NA	1	0	0	0	1	0	2	1	1	6	6	3
CP039930_3786717_3786828	90.0741	0.501701	0.195006	2.57275	0.0100895	0.0455191	124	105	121	87	78	89	79	87	85	88	66	75
EA667_011755|catalase_family_peroxidase	69.9939	0.550757	0.214221	2.57098	0.0101413	0.0457151	94	85	113	63	61	72	62	42	68	61	58	65
EA667_014220|methionine_synthase	726.777	-0.234439	0.0911984	-2.57065	0.0101508	0.0457203	793	497	774	801	857	784	838	634	645	724	719	771
CP039930_316813_317209	458.546	-0.248331	0.0966272	-2.56999	0.0101702	0.0457701	445	348	494	476	493	486	520	446	440	458	453	493
CP039930_679884_679982	3.61517	3.56319	1.38674	2.56948	0.0101852	NA	6	3	5	1	4	5	6	8	6	0	0	1
EA667_013045|pirin_family_protein	17.5673	-1.03112	0.401443	-2.56853	0.0102132	0.0459258	13	10	15	14	14	20	21	19	14	26	21	24
EA667_004810|hypothetical_protein	95.3224	0.507019	0.197428	2.56812	0.0102252	0.045942	95	76	133	113	91	101	155	114	98	61	62	72
CP039930_1446470_1446898	41.5344	-0.716132	0.278999	-2.56679	0.0102643	0.04608	36	24	31	44	54	47	34	48	46	42	50	45
EA667_009225|catechol_1,2-dioxygenase	66.839	-0.55857	0.217845	-2.56408	0.0103451	0.0464044	80	52	67	68	60	46	46	49	61	89	88	92
EA667_008680|universal_stress_protein	40.9752	-0.684663	0.267266	-2.56173	0.0104153	0.0466642	36	26	50	41	36	36	34	39	32	52	42	70
EA667_019280|succinyldiaminopimelate_transaminase	606.4	0.270384	0.105554	2.56157	0.0104201	0.0466642	749	489	735	653	774	745	638	519	602	497	525	470
EA667_019240|Crp/Fnr_family_transcriptional_regulator	21.079	0.995937	0.389425	2.55745	0.0105442	0.0471813	22	23	33	21	19	22	27	32	22	11	12	13
EA667_000695|nicotinate_phosphoribosyltransferase	479.217	0.276078	0.108066	2.55472	0.0106273	0.047496	510	344	672	536	546	487	617	546	479	373	349	418
EA667_001720|RidA_family_protein	366.398	0.28375	0.111075	2.55457	0.0106319	0.047496	438	320	494	382	411	409	341	347	371	308	314	318
CP039930_3173493_3173621	242.042	0.37108	0.145364	2.55277	0.010687	0.0477035	322	237	345	218	263	228	204	220	253	172	213	258
EA667_011830|2-(1,2-epoxy-1,2-dihydrophenyl)acetyl-CoA_isomerase	1882.34	0.533164	0.209262	2.54783	0.0108394	0.0483442	2433	1659	2395	1989	2431	2770	1548	1420	2203	1289	1434	1385
EA667_003870|APC_family_permease	963.193	-0.229131	0.0900099	-2.54562	0.0109084	0.0486122	970	669	1050	1035	1158	1055	1078	879	932	1016	958	897
EA667_001755|type_IV_pilus_modification_protein_PilV	2.20132	-3.96046	1.55727	-2.54321	0.010984	NA	0	0	0	5	1	7	4	0	2	3	2	3
CP039930_1773635_1773749	13.4262	-1.25446	0.493622	-2.54134	0.0110428	0.049147	13	9	8	12	6	6	19	11	9	20	12	35
EA667_000020|DNA_topoisomerase_(ATP-hydrolyzing)_subunit_B	5092.71	-0.178721	0.0703287	-2.54123	0.0110464	0.049147	5344	3672	5529	5324	5811	5697	5536	4735	5103	5009	5035	5003
CP039930_542923_543256	39360.4	-0.229827	0.0906041	-2.53661	0.0111931	0.0497419	43242	28501	36724	44071	46915	43471	41641	37644	37559	39215	40782	37013
EA667_006990|phosphoribosylamine--glycine_ligase	1368.47	-0.239091	0.094262	-2.53645	0.0111983	0.0497419	1463	939	1533	1439	1590	1409	1500	1199	1322	1464	1473	1275
EA667_008620|Lrp/AsnC_family_transcriptional_regulator	9.21352	-1.47524	0.581895	-2.53523	0.0112375	0.0498753	4	4	7	8	14	12	8	10	6	13	13	12
EA667_000745|DUF445_domain-containing_protein	220.045	0.314925	0.124234	2.53493	0.0112469	0.0498768	285	214	327	194	200	211	226	202	200	182	205	221
TG31307_3_216737_216788	14.1789	-1.14904	0.453352	-2.53455	0.0112593	0.0498911	15	5	17	15	6	7	14	8	10	19	30	24
EA667_012685|aspartate_carbamoyltransferase	390.182	-0.268563	0.106015	-2.53326	0.0113007	0.0500309	439	302	436	393	423	422	375	298	328	434	442	421
EA667_018035|trimeric_intracellular_cation_channel_family_protein	118.266	-0.440549	0.173924	-2.533	0.0113091	0.0500309	118	80	100	129	130	132	146	112	113	118	140	113
EA667_019760|hypothetical_protein	38.1151	0.748216	0.295643	2.53081	0.0113799	0.0503034	52	30	65	35	29	48	53	44	35	19	28	32
EA667_007045|peptidase	412.772	0.334329	0.13218	2.52934	0.0114276	0.0504735	461	294	575	449	413	513	505	482	419	273	278	405
EA667_015190|malonyl-ACP_O-methyltransferase_BioC	59.6859	-0.644183	0.254795	-2.52825	0.0114634	0.0505908	56	31	34	78	74	63	94	70	54	47	62	65
EA667_006875|glycine_betaine/L-proline_transporter_ProP	136.429	0.400505	0.158511	2.52667	0.0115149	0.0507436	217	153	242	83	101	129	107	88	102	147	135	141
EA667_014400|YaeQ_family_protein	111.108	-0.464897	0.184	-2.52662	0.0115166	0.0507436	126	60	98	126	133	139	119	99	96	136	112	107
EA667_014485|DUF2235_domain-containing_protein	479.446	-0.277772	0.109991	-2.5254	0.0115566	0.0508788	438	327	443	577	611	502	620	521	447	432	466	448
EA667_004155|3',5'-cyclic-nucleotide_phosphodiesterase	62.378	0.590996	0.234271	2.5227	0.0116458	0.0512302	83	68	96	68	69	42	64	55	61	56	36	59
EA667_007065|30S_ribosomal_protein_S18	10564.5	-0.201226	0.0798004	-2.52161	0.0116819	0.0513476	9797	6317	10344	13096	13175	11509	15062	11529	10755	9109	9081	9457
CP039930_284306_284459	21.4897	1.00498	0.3989	2.51939	0.0117558	0.0516313	32	24	24	19	26	35	17	25	22	12	12	13
CP039930_243130_243435	183.512	0.519579	0.206282	2.51879	0.011776	0.0516785	137	89	249	219	292	280	285	280	164	90	104	100
CP039930_3241158_3241390	27.3318	0.91046	0.361665	2.51742	0.0118219	0.0518382	40	28	45	30	31	29	39	13	26	23	9	23
CP039930_1468701_1468901	29.3133	-0.873054	0.346875	-2.51691	0.0118389	0.051871	26	20	28	22	42	17	26	22	24	24	46	55
TG31307_2_3025102_3025275	51.8352	-0.674873	0.268265	-2.5157	0.0118798	0.0519674	29	27	47	50	44	44	103	83	55	41	57	52
EA667_008185|hypothetical_protein	133.104	-0.401147	0.159458	-2.51569	0.0118799	0.0519674	134	104	155	117	136	129	112	138	101	154	163	158
EA667_001165|single-stranded_DNA-binding_protein	1719.51	-0.175927	0.0700025	-2.51316	0.0119656	0.0523003	1738	1240	1933	1837	1919	1814	1885	1730	1706	1716	1635	1716
EA667_010520|HAD_family_hydrolase	560.044	0.300402	0.119584	2.51205	0.0120031	0.0523699	766	599	1000	385	472	464	471	354	495	584	584	582
EA667_006790|BLUF_domain-containing_protein	29.5201	0.851699	0.339052	2.512	0.0120049	0.0523699	48	25	40	27	44	24	41	36	22	19	16	22
CP039930_3664642_3664697	649.848	-0.243181	0.0968136	-2.51184	0.0120102	0.0523699	710	496	689	645	727	699	676	558	601	689	707	660
CP039930_776526_776791	259.857	-0.305268	0.121644	-2.50951	0.01209	0.0526757	294	195	267	258	258	266	266	229	247	291	278	287
CP039930_2981428_2981938	258.043	-0.411016	0.163985	-2.50643	0.0121958	0.0530947	267	134	187	335	289	277	399	315	238	254	210	249
EA667_005130|DUF541_domain-containing_protein	101.962	0.457566	0.182733	2.50402	0.0122792	0.0534149	120	90	168	115	115	112	92	100	84	93	67	90
CP039930_3852484_3852842	557.949	0.308226	0.123146	2.50294	0.0123165	0.0535347	526	379	760	599	700	668	747	679	590	375	343	500
EA667_004030|universal_stress_protein	156.216	0.395141	0.158256	2.49684	0.0125304	0.0543814	191	130	227	167	161	176	174	141	163	98	123	159
TG31307_2_65666_66087	8.12493	1.59513	0.638863	2.49682	0.0125312	0.0543814	13	9	18	12	10	4	5	8	9	4	3	5
CP039931_82530_82687	27.6971	0.967567	0.387674	2.49583	0.0125664	0.054491	39	28	40	22	45	20	18	44	31	17	20	13
TG31307_2_3385324_3385483	1.5799	4.00007	1.60291	2.4955	0.0125781	NA	1	2	7	1	1	1	2	4	1	0	0	0
EA667_013260|polyketide_cyclase	155.508	-0.419028	0.168121	-2.49243	0.0126874	0.054972	139	89	143	197	200	158	216	170	135	119	158	176
EA667_003485|Asp-tRNA(Asn)/Glu-tRNA(Gln)_amidotransferase_subunit_GatB	1065.68	-0.241933	0.0971419	-2.49051	0.012756	0.0552256	1165	692	1021	1269	1289	1153	1315	995	973	1014	1023	1069
EA667_012320|peptidase_M15	440.477	-0.293174	0.11794	-2.4858	0.0129261	0.0558694	464	350	589	395	451	423	331	346	390	502	559	503
EA667_014430|choline_transporter	399.293	-0.271519	0.109231	-2.48573	0.0129287	0.0558694	433	293	520	321	378	361	429	380	349	415	500	449
EA667_018765|Gfo/Idh/MocA_family_oxidoreductase	1799.38	-0.247881	0.099729	-2.48554	0.0129354	0.0558694	2005	1364	1842	1869	2185	1881	1773	1528	1629	1997	1966	1711
TG31307_3_10291_10550	8.90823	-1.46923	0.591311	-2.4847	0.0129662	0.0559009	6	7	3	7	13	8	5	5	9	14	11	17
EA667_009610|hypothetical_protein	8.52877	-1.57193	0.632651	-2.48468	0.0129669	0.0559009	7	1	8	7	14	4	12	4	5	9	17	16
EA667_017240|Na+/H+_antiporter_subunit_E	145.541	-0.401604	0.161665	-2.48418	0.0129852	0.0559009	171	79	153	144	177	147	165	125	131	156	165	159
EA667_017570|anthranilate_synthase_component_I	506.676	-0.232035	0.0934117	-2.484	0.0129916	0.0559009	512	343	585	542	566	528	588	496	463	507	503	528
EA667_015775|tRNA_(adenosine(37)-N6)-threonylcarbamoyltransferase_complex_dimerization_subunit_type_1_TsaB	274.555	-0.298987	0.120368	-2.48394	0.0129938	0.0559009	284	170	323	287	310	284	291	279	246	299	287	278
EA667_007455|helix-turn-helix_domain-containing_protein	100.011	-0.456439	0.183846	-2.48273	0.0130381	0.0560473	100	69	110	71	116	96	103	96	97	126	108	115
TG31307_2_3410019_3410128	10.5539	-1.38337	0.557281	-2.48235	0.013052	0.0560535	5	4	7	12	11	11	10	15	14	14	12	12
CP039930_2507781_2508383	287.132	0.624098	0.251437	2.48213	0.01306	0.0560535	250	213	434	382	442	347	383	380	197	193	166	165
EA667_010555|(2Fe-2S)-binding_protein	11.442	-1.3847	0.558417	-2.47969	0.0131496	0.0563938	4	4	8	6	16	9	20	19	15	12	13	13
EA667_019635|hypothetical_protein	10.0412	-1.34039	0.54061	-2.4794	0.0131604	0.0563957	7	4	11	8	15	6	11	4	5	19	15	16
EA667_004020|metalloprotease	38.8662	0.693322	0.279812	2.47781	0.013219	0.0566025	57	36	54	37	44	44	45	34	41	21	34	28
EA667_014500|type_VI_secretion_system_tip_protein_VgrG	731.386	-0.21378	0.0862877	-2.47752	0.0132298	0.0566047	726	556	784	782	828	772	804	720	687	694	751	756
EA667_017705|UDP-N-acetylmuramoyl-L-alanine--D-glutamate_ligase	500.464	-0.292354	0.118021	-2.47713	0.0132442	0.056622	595	354	620	484	508	523	392	370	461	587	603	547
EA667_007340|GNAT_family_N-acetyltransferase	204.993	0.370267	0.149527	2.47626	0.0132765	0.0566818	219	228	308	227	209	183	189	188	183	182	167	192
CP039930_539946_540074	40.9112	-0.744783	0.300777	-2.4762	0.013279	0.0566818	33	35	20	51	60	44	45	33	30	39	46	55
EA667_014095|SRPBCC_domain-containing_protein	136.401	0.41258	0.166738	2.47442	0.0133451	0.0569197	160	136	186	141	139	131	128	141	155	121	107	105
EA667_002770|acyl-CoA_thioesterase	90.8013	-0.467073	0.188813	-2.47373	0.013371	0.0569817	88	51	102	91	104	95	114	77	82	107	98	96
CP039930_424549_424722	182.598	-0.481846	0.194805	-2.47348	0.0133805	0.0569817	133	117	262	174	156	204	157	184	179	189	174	284
EA667_019715|type_II_toxin-antitoxin_system_prevent-host-death_family_antitoxin	358.782	-0.325708	0.131737	-2.47241	0.0134206	0.0570564	436	194	351	387	379	420	389	366	340	357	368	383
EA667_004690|sulfate_ABC_transporter_ATP-binding_protein	81.3432	-0.514348	0.208069	-2.472	0.0134358	0.0570564	86	56	74	77	57	93	81	88	83	98	87	98
EA667_006555|cold-shock_protein	3991.86	-0.221575	0.089636	-2.47194	0.0134383	0.0570564	3579	2923	4191	4063	4197	3901	5413	4893	3802	3569	3983	3933
CP039930_2613978_2614072	170.457	0.469827	0.190067	2.4719	0.0134398	0.0570564	220	114	226	200	246	220	200	199	117	104	94	168
EA667_003185|prepilin-type_N-terminal_cleavage/methylation_domain-containing_protein	140.597	-0.401496	0.162567	-2.46972	0.0135218	0.05736	117	79	138	159	133	156	198	178	154	113	134	155
CP039930_1922189_1922347	8.29169	-1.4728	0.597156	-2.46636	0.0136495	0.0578569	5	4	8	9	5	3	9	9	4	16	9	18
EA667_004965|NAD(P)/FAD-dependent_oxidoreductase	244.612	0.318666	0.129228	2.46592	0.0136663	0.0578831	279	230	338	270	240	283	253	239	216	212	183	229
CP039930_404603_404702	17.0667	1.08176	0.439445	2.46165	0.0138298	0.0585305	23	19	32	9	20	19	17	26	12	8	10	14
EA667_006900|DMT_family_transporter	8.83387	1.61846	0.658211	2.45887	0.0139373	0.05894	9	17	12	10	7	13	5	12	8	3	2	7
CP039930_3744857_3745162	31.507	0.804714	0.32771	2.45557	0.0140662	0.0594389	38	22	55	38	47	31	39	38	24	23	17	19
EA667_002070|oxygen-dependent_coproporphyrinogen_oxidase	922.07	-0.594234	0.242105	-2.45444	0.0141103	0.0595793	752	455	1144	855	857	1112	957	977	955	847	869	1455
EA667_015840|protein_FilA	448.424	0.276367	0.112721	2.45179	0.0142148	0.059974	426	337	484	570	495	456	665	584	521	317	296	333
EA667_005105|HTH-type_transcriptional_repressor_FabR	180.668	-0.350566	0.143022	-2.45113	0.014241	0.0599962	154	129	211	194	205	191	178	186	164	178	206	191
EA667_001590|penicillin-binding_protein_PBP3	1043.17	-0.210722	0.0859702	-2.4511	0.014242	0.0599962	1082	783	1168	1048	1218	1192	1049	895	990	1082	1050	1081
TG31307_3_231828_231953	18.5644	-1.06225	0.433574	-2.44999	0.0142861	0.0601356	10	8	23	15	21	23	22	20	7	29	16	32
CP039930_3037244_3037513	117.937	-0.427066	0.174345	-2.44954	0.0143038	0.0601638	104	101	121	118	122	98	119	121	105	149	117	140
EA667_005660|GTP_cyclohydrolase_I_FolE	200.456	-0.329037	0.134414	-2.44793	0.014368	0.0603876	209	143	218	194	214	168	235	206	185	221	192	242
EA667_007570|hypothetical_protein	13.6011	1.14516	0.468636	2.4436	0.0145417	0.0610705	24	17	24	12	8	9	16	8	20	8	8	11
CP039930_1732153_1732379	21.6931	-0.907668	0.371654	-2.44224	0.0145964	0.0612534	14	17	16	21	18	19	21	29	21	26	30	26
EA667_004490|rhombotarget_A	572.145	0.238228	0.0975983	2.4409	0.0146506	0.0614337	675	463	644	662	667	604	664	622	582	464	464	457
EA667_016020|phenylalanine--tRNA_ligase_subunit_beta	2878.08	0.158422	0.0649552	2.43894	0.0147303	0.0617207	3387	2324	3634	2949	3233	3094	3276	2736	2767	2530	2403	2716
EA667_010340|YbaB/EbfC_family_nucleoid-associated_protein	1580.44	0.21785	0.0894257	2.4361	0.0148465	0.0621597	1979	1453	1786	1680	1757	1701	1644	1562	1435	1384	1360	1409
EA667_003300|proline--tRNA_ligase	869.098	-0.215713	0.0885889	-2.43499	0.0148923	0.0623038	865	590	932	907	1076	937	1037	871	831	821	882	823
CP039930_3122929_3123003	7155.13	-0.177831	0.0730502	-2.43437	0.0149179	0.0623318	7421	5212	7270	7667	8230	7849	8445	7270	6811	6844	7087	6737
EA667_001415|imidazole_glycerol_phosphate_synthase_subunit_HisH	459.178	-0.245511	0.100865	-2.43404	0.0149312	0.0623318	489	302	565	465	533	529	453	398	396	461	487	507
CP039930_602517_602589	34.59	-0.740097	0.304067	-2.434	0.0149332	0.0623318	29	24	30	48	41	42	25	24	25	41	56	30
EA667_002300|50S_ribosomal_protein_L18	6353.61	-0.208919	0.0859131	-2.43174	0.0150263	0.0626727	5986	4158	5910	7694	8169	7243	8413	6469	6413	5993	5659	5345
EA667_002350|50S_ribosomal_protein_L17	5462.17	-0.210223	0.0865264	-2.42958	0.0151163	0.0629998	5204	3215	5312	6339	7281	6230	7611	5935	5310	4909	4765	4729
EA667_011165|hypothetical_protein	47.301	0.631575	0.26005	2.42867	0.0151543	0.0631102	58	35	73	62	57	51	54	44	52	26	31	40
EA667_015100|aspartate_1-decarboxylase	1170.92	-0.215019	0.0885538	-2.42811	0.0151776	0.0631593	1174	983	1364	1126	1270	1257	1100	1065	1017	1184	1293	1292
TG31307_2_3556764_3557029	554.41	0.259738	0.10713	2.4245	0.0153295	0.0637222	693	523	634	588	588	588	557	563	546	483	458	489
EA667_019365|ACR3_family_arsenite_efflux_transporter	19.7347	1.05124	0.433667	2.42408	0.0153473	0.0637222	30	15	26	20	23	34	16	29	19	15	7	9
EA667_011810|phenylacetic_acid_degradation_operon_negative_regulatory_protein_PaaX	549.066	0.269525	0.111189	2.42402	0.0153496	0.0637222	735	425	642	557	662	621	565	550	575	469	445	447
EA667_006600|CvpA_family_protein	354.359	-0.288706	0.119113	-2.42379	0.0153595	0.0637222	396	200	406	384	378	401	368	352	332	336	357	410
EA667_009315|Rrf2_family_transcriptional_regulator	17.1131	-1.01346	0.418953	-2.41902	0.0155625	0.0645152	10	9	21	11	13	14	21	21	13	31	16	26
CP039930_2304047_2304571	347.972	-0.301947	0.125033	-2.41493	0.0157383	0.0651948	411	223	354	375	378	391	370	281	334	384	372	349
EA667_018540|D-amino_acid_dehydrogenase	1517.51	0.606072	0.251107	2.4136	0.0157957	0.0653717	1754	894	2144	1776	1681	2132	1838	1750	1993	798	680	1338
EA667_007210|AarF/ABC1/UbiB_kinase_family_protein	919.913	0.247498	0.102552	2.41339	0.0158049	0.0653717	1148	836	1336	905	846	996	870	760	905	860	872	817
EA667_016545|Fe2+-dependent_dioxygenase	145.575	-0.422951	0.17546	-2.41053	0.0159294	0.0658369	130	75	138	168	180	189	192	165	128	146	100	172
EA667_015200|adenosylmethionine--8-amino-7-oxononanoate_transaminase	108.403	-0.572758	0.237754	-2.40904	0.0159947	0.0660568	97	59	72	154	121	116	163	152	76	74	127	111
EA667_017200|2-octaprenylphenol_hydroxylase	426.746	-0.274181	0.113839	-2.4085	0.0160181	0.0660725	458	270	491	460	472	470	474	378	385	426	497	408
EA667_005675|xanthine_dehydrogenase_accessory_protein_XdhC	21.0405	-0.903522	0.375161	-2.40836	0.0160244	0.0660725	15	10	21	21	21	17	21	27	23	30	20	28
EA667_009530|iron_ABC_transporter_permease	6.42901	-1.67136	0.694052	-2.40812	0.0160348	0.0660725	2	2	8	7	10	5	2	4	3	8	16	10
CP039930_91098_91314	563.716	0.297257	0.12354	2.40616	0.0161211	0.0663764	578	427	787	693	665	509	740	654	533	395	436	493
EA667_017325|23S_rRNA_(guanosine(2251)-2'-O)-methyltransferase_RlmB	328.584	-0.277067	0.115162	-2.4059	0.0161328	0.0663764	315	216	348	356	385	339	370	332	360	283	320	370
TG31307_2_2851043_2851192	2.32926	3.51939	1.46355	2.40469	0.0161862	NA	4	5	4	1	4	3	2	1	3	0	1	0
EA667_016405|histidine--tRNA_ligase	1767.32	-0.221809	0.0922514	-2.4044	0.0161992	0.0665993	1918	1256	2026	1825	2114	1888	1791	1474	1634	1936	1896	1673
EA667_005705|aminodeoxychorismate/anthranilate_synthase_component_II	340.416	-0.278763	0.116007	-2.40298	0.0162623	0.0668085	338	232	377	319	388	411	355	325	339	319	352	377
EA667_000455|LysR_family_transcriptional_regulator	14.0873	-1.19227	0.49628	-2.4024	0.0162877	0.0668628	11	8	9	10	15	21	22	8	7	26	12	21
CP039930_2793629_2793838	246.998	0.438061	0.182585	2.39922	0.0164299	0.0673959	274	241	298	248	297	323	274	236	254	108	217	235
EA667_000400|hypothetical_protein	28.0738	-0.853676	0.355918	-2.39852	0.0164616	0.0674752	40	9	22	25	24	22	32	22	29	38	48	28
EA667_002880|branched-chain_amino_acid_transaminase	1352.11	-0.197988	0.082631	-2.39605	0.0165727	0.0678798	1358	858	1459	1535	1499	1366	1784	1382	1416	1236	1252	1340
TG31307_2_3372091_3372366	40.5001	0.688178	0.287427	2.39427	0.0166537	0.0681257	49	37	62	38	35	45	44	40	60	25	23	36
EA667_016445|glycosyltransferase_family_1_protein	81.2986	0.509563	0.212834	2.39418	0.0166577	0.0681257	85	95	125	77	87	87	98	70	63	52	67	80
EA667_011385|allantoin_permease	5.42283	-2.10327	0.880474	-2.38879	0.016904	0.0690817	5	0	1	4	2	5	7	8	10	13	3	7
EA667_019115|CDF_family_Co(II)/Ni(II)_efflux_transporter_DmeF	29.8653	0.815968	0.341635	2.38842	0.0169208	0.0690987	33	31	33	36	27	34	44	40	34	16	23	12
CP039930_870195_870301	33.1128	0.836143	0.350156	2.38792	0.0169442	0.0691424	39	23	38	42	47	29	47	64	29	19	13	19
CP039930_2058698_2058921	112.712	0.440788	0.184698	2.38653	0.0170083	0.0693217	137	107	142	125	151	107	115	135	91	77	90	95
EA667_004115|bifunctional_methylenetetrahydrofolate_dehydrogenase/methenyltetrahydrofolate_cyclohydrolase_FolD	1032.15	-0.205442	0.0860889	-2.38639	0.0170147	0.0693217	1108	703	1065	1130	1271	1145	1140	961	999	1000	1030	994
EA667_009690|hypothetical_protein	23.2991	-0.838237	0.351294	-2.38614	0.0170262	0.0693217	15	18	26	19	19	11	21	25	26	34	30	33
EA667_012905|hypothetical_protein	17.9467	1.0029	0.420575	2.3846	0.0170978	0.0695618	21	14	34	22	20	24	25	16	16	9	10	12
CP039930_867421_867661	319.692	-0.307393	0.129137	-2.38037	0.0172952	0.0703124	350	242	362	302	350	350	322	220	287	375	299	408
CP039930_1522465_1522533	522.519	0.240818	0.101302	2.37723	0.0174432	0.0708612	582	464	687	544	543	570	565	511	534	480	413	452
CP039930_3333072_3333153	76.2739	0.515467	0.216926	2.37623	0.0174907	0.0710017	93	88	139	86	70	73	56	70	43	81	58	66
EA667_003010|glycerophosphodiester_phosphodiesterase	67.1215	-0.520099	0.219231	-2.37238	0.017674	0.0716925	53	51	62	86	70	65	81	63	59	66	75	79
EA667_006285|hypothetical_protein	472.759	-0.24009	0.101246	-2.37136	0.017723	0.0718378	492	315	496	536	532	504	487	479	495	464	455	484
CP039930_3625019_3625338	14194.8	-0.211363	0.0891924	-2.36974	0.0178007	0.0720508	13991	8689	12174	17333	17987	15890	20099	15932	14345	12449	11921	12585
EA667_002185|Rrf2_family_transcriptional_regulator	44.8806	-0.670498	0.282945	-2.36971	0.0178019	0.0720508	47	27	39	48	54	26	54	38	45	40	53	72
CP039930_444896_445171	195.352	-0.337557	0.142531	-2.36831	0.0178695	0.072271	185	126	200	210	229	240	232	177	189	169	180	242
EA667_016395|outer_membrane_protein_assembly_factor_BamB	1785.44	-0.167423	0.0707918	-2.36501	0.0180296	0.0728647	1895	1221	2047	1959	2069	1985	1966	1644	1672	1771	1706	1790
EA667_008695|MarR_family_transcriptional_regulator	125.352	-0.387995	0.164356	-2.36069	0.0182408	0.0736637	137	83	165	105	110	129	105	110	115	135	152	169
EA667_015585|flavin_reductase	100.619	-0.537792	0.227935	-2.3594	0.0183043	0.0737392	69	40	125	87	102	93	160	155	102	89	80	134
EA667_009895|peptidase	131.551	0.459963	0.194953	2.35936	0.0183066	0.0737392	176	136	228	86	167	137	102	90	117	112	138	107
EA667_002875|bifunctional_[glutamate--ammonia_ligase]-adenylyl-L-tyrosine_phosphorylase/[glutamate--ammonia-ligase]_adenylyltransferase	1064.97	-0.208307	0.088293	-2.35928	0.0183107	0.0737392	1031	731	1130	1167	1142	1142	1317	1187	1048	910	952	1201
EA667_016680|50S_ribosomal_protein_L33	2782.51	-0.182508	0.0773594	-2.35922	0.0183134	0.0737392	2742	1775	2635	3271	3535	3134	3517	3160	2756	2468	2469	2477
EA667_015165|threonylcarbamoyl-AMP_synthase	161.847	0.348586	0.14824	2.3515	0.018698	0.0752323	205	114	229	180	189	188	183	165	146	127	116	146
TG31307_2_2889703_2889946	2.86216	-3.08966	1.31391	-2.35149	0.0186982	NA	0	0	2	1	3	3	2	5	3	4	8	3
CP039930_2763081_2763244	1.92365	-3.76429	1.60146	-2.35053	0.0187469	NA	0	0	0	1	6	2	6	1	1	1	3	3
CP039930_2923871_2923975	3.15377	3.45575	1.47027	2.35042	0.0187524	NA	5	0	9	3	5	0	7	7	4	1	0	0
EA667_016415|helix-turn-helix_domain-containing_protein	1518.39	-0.190165	0.0809123	-2.35027	0.01876	0.0754264	1562	1113	1716	1536	1832	1588	1640	1388	1470	1533	1537	1505
EA667_010920|3-deoxy-manno-octulosonate_cytidylyltransferase	281.605	-0.287468	0.122395	-2.34868	0.01884	0.0756924	264	198	361	271	312	282	271	264	277	299	286	328
EA667_007605|universal_stress_protein	423.921	0.301213	0.128307	2.3476	0.0188948	0.0758568	422	319	567	444	445	502	513	522	485	289	270	410
EA667_006950|MFS_transporter	10.2522	-1.30187	0.554752	-2.34676	0.0189374	0.0759717	7	3	8	5	12	12	11	15	11	14	12	14
CP039930_1805376_1805603	46.4753	-0.622301	0.265257	-2.34603	0.0189745	0.0760649	49	41	47	42	26	53	31	41	27	67	64	64
TG31307_2_194926_195302	1425.33	-0.271638	0.115818	-2.34539	0.0190072	0.0761401	1460	1237	1275	1458	1556	1595	1447	1288	1326	1562	1505	1427
CP039930_342240_342310	264.44	-0.30391	0.129667	-2.34378	0.0190894	0.076382	271	147	310	286	245	266	320	273	294	268	261	280
EA667_003810|recombinase	248.966	-0.308694	0.131715	-2.34365	0.0190961	0.076382	268	149	281	241	301	238	269	265	236	232	255	296
EA667_019435|hypothetical_protein	27.6724	0.794676	0.339116	2.34337	0.0191103	0.076382	38	37	32	27	33	27	34	22	26	20	14	24
EA667_015170|segregation/condensation_protein_A	699.129	0.246046	0.105008	2.34312	0.0191234	0.076382	734	568	940	720	744	671	943	830	660	517	544	668
CP039930_958642_958852	146.39	0.38607	0.164934	2.34075	0.0192449	0.0768112	162	121	150	201	177	182	201	150	141	103	106	96
EA667_017080|CBS_domain-containing_protein	331.427	0.258521	0.110464	2.34032	0.0192672	0.0768212	400	290	434	377	386	345	342	305	293	303	280	276
EA667_007320|LysR_family_transcriptional_regulator	150.193	-0.360223	0.153931	-2.34016	0.0192755	0.0768212	138	100	191	155	164	126	164	147	137	160	174	165
CP039930_584712_584882	251.285	-0.298635	0.127694	-2.33867	0.0193525	0.0770718	267	142	255	288	288	279	317	240	251	243	236	261
EA667_004050|glutamine-hydrolyzing_carbamoyl-phosphate_synthase_small_subunit	4522.46	-0.18095	0.0776375	-2.33071	0.0197688	0.0786414	4825	3540	5242	4609	5264	4610	4627	3904	3995	4821	4824	4473
EA667_010090|LysR_family_transcriptional_regulator	259.286	0.304175	0.130517	2.33054	0.0197775	0.0786414	323	206	307	326	307	255	302	286	236	207	190	222
CP039930_2590488_2591006	36.7807	-0.746724	0.320444	-2.33028	0.0197913	0.0786414	29	18	36	34	46	29	54	55	21	35	48	43
EA667_013890|hypothetical_protein	13.3265	1.13062	0.485238	2.33004	0.0198043	0.0786414	18	17	22	14	10	21	13	15	8	8	9	7
CP039930_2083423_2084190	16.5658	1.02827	0.44136	2.32977	0.0198186	0.0786414	23	16	21	22	17	18	24	14	21	10	8	9
EA667_009460|MFS_transporter	13.7799	-1.11374	0.478817	-2.32603	0.0200168	0.0793704	9	5	12	14	19	11	20	12	15	11	18	22
EA667_016110|3-methyl-2-oxobutanoate_hydroxymethyltransferase	592.344	-0.222582	0.0957786	-2.32392	0.0201296	0.0797599	626	448	626	618	710	666	655	518	495	602	605	613
EA667_001000|pyridoxamine_5'-phosphate_oxidase	530.041	0.234277	0.100845	2.32314	0.0201714	0.0798677	668	489	719	529	607	554	495	457	450	474	529	456
CP039930_2575382_2575656	38.3793	0.730322	0.314506	2.32213	0.0202261	0.0800263	42	36	54	53	44	40	62	43	25	16	31	26
EA667_011970|nucleoside_deaminase	15.5731	1.03743	0.448263	2.31433	0.0206498	0.0816435	30	13	25	20	10	18	17	13	16	7	9	14
CP039930_3374661_3374758	101.869	-0.413148	0.178571	-2.31363	0.0206878	0.0817346	106	76	110	95	115	90	85	93	100	108	126	122
EA667_013485|UPF0149_family_protein	498.755	-0.235767	0.102014	-2.31112	0.0208264	0.0822227	497	313	608	511	573	527	600	469	474	480	501	528
TG31307_3_38358_38431	7.85455	-1.46417	0.63361	-2.31083	0.0208422	0.0822258	6	1	10	8	3	6	4	4	11	13	15	13
EA667_001505|TolC_family_protein	40.1842	0.724272	0.313596	2.30957	0.0209119	0.0824414	60	18	50	50	68	48	55	50	34	25	20	24
EA667_008220|hypothetical_protein	2.71296	-2.72462	1.17978	-2.30944	0.0209193	NA	0	2	1	2	2	0	1	2	2	10	2	7
EA667_005210|tRNA_2-thiouridine(34)_synthase_MnmA	756.884	-0.217075	0.094037	-2.3084	0.0209767	0.0826374	862	477	821	831	857	831	854	714	697	709	779	786
EA667_015510|response_regulator	1101.87	0.227081	0.0983847	2.30809	0.020994	0.0826461	1502	1055	1559	1021	1039	1165	941	828	993	1103	1070	1044
EA667_019425|ATP-binding_cassette_domain-containing_protein	39.7441	-0.652372	0.282696	-2.30768	0.0210169	0.0826765	54	21	40	25	25	28	40	39	43	44	45	75
TG31307_2_3560162_3560292	3.05902	2.98478	1.29404	2.30657	0.0210789	NA	8	2	8	2	5	1	5	1	5	0	1	1
EA667_010525|acetyltransferase	96.0479	0.480027	0.20819	2.30572	0.0211264	0.0830477	148	64	116	110	124	99	131	81	98	80	63	69
EA667_004200|protease_HtpX	1104.67	-0.214058	0.092852	-2.30537	0.0211458	0.0830639	1176	785	1489	973	1133	1056	1204	1028	950	1190	1067	1366
EA667_016015|integration_host_factor_subunit_alpha	1050.21	0.191282	0.0830695	2.30267	0.0212973	0.083599	1206	873	1447	1022	1106	1168	1154	1014	981	936	857	1024
EA667_009270|aldehyde_dehydrogenase_(NADP(+))	38.4312	-0.637504	0.277031	-2.3012	0.0213803	0.0838061	44	21	38	44	37	29	39	32	35	44	55	46
CP039930_3687312_3687789	372.211	-0.262672	0.114146	-2.30119	0.0213807	0.0838061	437	318	416	333	339	339	325	317	351	397	443	454
EA667_000485|hypothetical_protein	44.1291	0.621745	0.270225	2.30085	0.0214004	0.0838232	49	46	60	45	58	46	64	41	37	29	30	34
TG31307_3_287876_288102	32.4488	-0.764975	0.332624	-2.29982	0.0214584	0.0839904	22	27	24	26	22	37	41	48	24	38	44	34
EA667_008505|hypothetical_protein	9.71528	-1.38703	0.603317	-2.299	0.021505	0.0841124	9	2	9	9	11	4	13	2	12	16	20	10
EA667_012375|RND_transporter	235.582	0.299317	0.130231	2.29836	0.0215416	0.0841953	265	195	286	293	263	239	284	253	239	173	198	184
EA667_010595|AarF/ABC1/UbiB_kinase_family_protein	1065.23	0.246158	0.107136	2.29762	0.0215833	0.0842982	1289	923	1625	989	1050	1166	989	891	1087	931	890	1123
EA667_016540|TonB-dependent_siderophore_receptor	921.126	0.770093	0.335268	2.29695	0.0216216	0.0843704	1099	339	619	1654	1714	1129	1780	1248	904	340	351	382
EA667_012470|pyrroline-5-carboxylate_reductase	122.912	-0.379726	0.165332	-2.29676	0.0216327	0.0843704	101	81	132	129	129	119	167	146	116	120	125	128
EA667_018490|enoyl-CoA_hydratase	234.735	0.434088	0.189024	2.29647	0.0216491	0.0843745	311	181	293	236	315	403	160	190	254	184	159	185
EA667_004590|protein_TolQ	825.878	0.198366	0.0864315	2.29507	0.0217291	0.0846258	1023	621	1104	897	922	912	847	778	806	712	710	747
EA667_012510|transposase	73.2823	-0.633992	0.27629	-2.29466	0.0217524	0.0846562	34	37	74	67	60	73	138	140	68	45	76	84
EA667_013290|hypothetical_protein	149.26	-0.334346	0.145732	-2.29425	0.0217764	0.0846893	154	117	172	148	149	167	138	120	124	171	155	186
CP039930_2034182_2034254	49.6213	0.633738	0.276318	2.29351	0.0218184	0.0847926	62	50	69	49	47	35	59	52	72	22	32	54
EA667_009580|DHA2_family_efflux_MFS_transporter_permease_subunit	15.7621	-0.992565	0.432926	-2.29269	0.021866	0.084907	19	11	12	10	10	13	20	12	4	21	27	29
CP039930_882784_882864	5.52185	2.11351	0.921985	2.29235	0.0218856	0.084907	14	5	10	7	1	2	3	18	2	2	2	2
EA667_003710|phosphoethanolamine--lipid_A_transferase	84.1372	0.441113	0.192451	2.29208	0.0219008	0.084907	117	76	127	84	76	78	96	78	78	70	83	61
CP039930_1136209_1136284	9.47283	-1.27965	0.558331	-2.29192	0.02191	0.084907	12	3	6	4	13	7	9	8	6	13	16	17
EA667_009135|amidase	10.8892	1.75249	0.764737	2.29163	0.021927	0.0849116	9	6	7	18	11	13	21	28	16	0	4	2
EA667_004755|signal_peptidase_I	760.38	-0.216946	0.0946798	-2.29137	0.0219422	0.0849116	707	514	796	815	968	797	917	779	815	680	757	704
CP039930_661794_661885	4.63526	2.47603	1.0809	2.29072	0.0219796	NA	8	2	9	14	6	3	6	4	4	2	0	1
EA667_004775|hypothetical_protein	240.866	-0.302972	0.132274	-2.2905	0.0219924	0.0850428	222	180	293	227	256	241	296	220	201	236	280	267
EA667_015385|hypothetical_protein	104.16	0.428842	0.187248	2.29024	0.0220072	0.0850428	142	89	155	84	121	107	120	104	91	63	94	104
EA667_003250|TonB-dependent_receptor	290.195	0.283278	0.123862	2.28704	0.0221933	0.0857004	380	243	368	334	327	307	306	255	272	205	273	266
CP039930_899609_899713	11.4715	1.27414	0.557177	2.28678	0.0222088	0.0857004	15	19	14	10	9	12	19	10	11	1	8	10
EA667_010580|siderophore_biosynthesis_protein	13.25	1.23816	0.541804	2.28524	0.0222985	0.085986	34	11	12	11	16	18	20	12	8	11	3	8
EA667_006985|NLPA_lipoprotein	1489.47	0.163275	0.0714989	2.28359	0.0223954	0.0862988	1664	1273	1910	1536	1615	1582	1645	1469	1436	1304	1277	1388
EA667_006700|hypothetical_protein	320.116	-0.291358	0.127614	-2.28312	0.0224233	0.0863453	317	170	359	357	370	343	443	317	312	281	311	340
EA667_003120|patatin_family_protein	105.554	-0.452834	0.198377	-2.28269	0.0224486	0.086382	87	55	115	98	134	111	159	105	110	94	87	138
EA667_000865|alpha/beta_hydrolase	145.038	0.343176	0.150385	2.28198	0.0224904	0.0864822	194	134	257	124	139	130	147	121	103	138	128	152
EA667_019710|Txe/YoeB_family_addiction_module_toxin	509.918	-0.285865	0.125323	-2.28103	0.0225469	0.0866383	589	264	536	599	570	546	565	562	478	530	486	500
CP039930_889509_889690	22.6048	0.869301	0.381274	2.27999	0.022608	0.0868123	34	24	25	23	31	35	19	18	24	18	11	13
EA667_004730|PaaI_family_thioesterase	41.9073	-0.628279	0.275596	-2.27971	0.0226247	0.0868155	42	28	33	28	42	34	58	53	40	47	58	41
EA667_001870|hypothetical_protein	26.8508	0.804761	0.353603	2.27589	0.0228525	0.0875688	32	22	57	29	36	17	29	31	22	19	15	23
EA667_006265|DUF962_domain-containing_protein	41.9208	0.645163	0.283478	2.27588	0.0228531	0.0875688	45	45	57	46	43	25	62	46	53	27	28	32
EA667_005685|indole-3-glycerol_phosphate_synthase_TrpC	508.355	-0.212291	0.0935545	-2.26917	0.0232578	0.0890008	539	383	580	525	567	521	518	473	459	498	551	542
EA667_006060|hypothetical_protein	51.8043	0.613021	0.270155	2.26915	0.0232594	0.0890008	63	35	62	42	63	82	73	66	58	32	27	36
EA667_017845|ImmA/IrrE_family_metallo-endopeptidase	604.527	-0.254683	0.112271	-2.26847	0.0233004	0.0890931	675	478	787	517	503	552	589	522	557	595	637	887
EA667_002635|ClpXP_protease_specificity-enhancing_factor	533.619	0.222907	0.0982742	2.26822	0.0233161	0.0890931	627	435	691	539	559	623	556	552	542	448	441	482
CP039930_170673_170822	83.6505	0.480807	0.212231	2.26548	0.0234831	0.0896686	111	85	102	93	76	101	76	97	75	58	56	84
CP039930_1068633_1068700	2.08569	3.62075	1.59903	2.26435	0.0235527	NA	2	3	10	3	0	0	0	5	2	0	0	1
EA667_000755|DUF924_domain-containing_protein	111.71	0.385043	0.170239	2.26178	0.023711	0.0904756	146	90	164	114	110	132	117	101	113	91	86	101
EA667_013055|metal-dependent_hydrolase	15.5645	-0.982736	0.434733	-2.26055	0.0237873	0.0907034	18	8	10	14	14	22	14	8	14	19	23	23
EA667_011950|epoxyqueuosine_reductase_QueH	75.3388	-0.460872	0.203944	-2.2598	0.0238338	0.0907937	69	43	79	83	80	83	94	69	78	83	66	90
CP039930_3684090_3684147	676.121	-0.254979	0.112841	-2.25963	0.0238442	0.0907937	680	432	712	684	631	843	839	699	723	581	644	759
EA667_001840|phosphoglycerate_dehydrogenase	2641.49	-0.163346	0.0723286	-2.25838	0.0239219	0.0909673	2929	1913	2985	2803	2956	2757	2860	2410	2459	2627	2743	2614
EA667_018590|DUF3396_domain-containing_protein	719.893	-0.259769	0.115025	-2.25836	0.023923	0.0909673	790	486	711	815	786	786	702	710	763	761	759	647
EA667_016750|ATP-binding_cassette_domain-containing_protein	394.486	-0.246847	0.109382	-2.25673	0.0240247	0.0912484	403	240	434	407	490	434	463	415	367	372	401	384
EA667_002310|50S_ribosomal_protein_L30	4888.4	-0.194304	0.0861032	-2.25664	0.0240303	0.0912484	4908	2859	4603	5900	6206	5652	6556	5147	5104	4512	4159	4159
EA667_007740|UDP-N-acetylmuramate_dehydrogenase	172.222	-0.32561	0.14432	-2.25617	0.0240598	0.0912972	179	115	163	201	178	196	189	177	166	161	183	180
EA667_016105|pantoate--beta-alanine_ligase	477.882	-0.239354	0.106136	-2.25517	0.0241226	0.0914718	497	333	515	572	568	553	507	384	428	522	469	456
EA667_018550|DUF1624_domain-containing_protein	5.30607	2.40128	1.06495	2.25484	0.0241434	0.0914874	6	5	6	7	9	4	12	3	11	0	0	3
EA667_017625|hydroxymethylbilane_synthase	223.267	-0.297722	0.132134	-2.25319	0.0242474	0.0918176	233	128	262	246	241	240	250	201	229	228	220	243
EA667_012255|DUF1826_domain-containing_protein	11.0117	-1.15607	0.513189	-2.25271	0.0242774	0.0918677	9	6	7	9	13	12	10	13	8	12	18	15
TG31307_2_3645459_3645682	103.856	0.407445	0.180899	2.25233	0.0243014	0.091895	135	75	146	119	108	96	121	116	114	69	81	93
EA667_016400|tetratricopeptide_repeat_protein	1120.71	-0.195803	0.0870132	-2.25027	0.0244319	0.0923246	1226	779	1177	1228	1303	1243	1192	1107	1030	1139	1134	1048
EA667_010290|tryptophan_synthase_subunit_beta	336.198	0.253744	0.112811	2.24928	0.0244949	0.0924988	455	283	459	332	360	372	320	280	316	280	295	340
TG31307_3_240303_241531	9.92859	-1.23776	0.550605	-2.24801	0.0245759	0.0927239	6	7	8	11	11	19	7	2	2	17	10	19
EA667_019215|methionine_transporter	10.8219	1.30991	0.582752	2.24781	0.0245885	0.0927239	17	5	20	13	20	9	11	12	14	5	3	7
CP039930_3881128_3881219	35.6919	-0.674683	0.300233	-2.24719	0.0246277	0.0928062	36	19	27	37	36	43	44	42	29	43	45	31
CP039931_77562_77813	50.2166	0.586094	0.260841	2.24693	0.0246442	0.0928062	47	51	71	50	43	59	76	56	55	34	29	41
TG31307_2_71546_71734	6.06934	1.66662	0.741997	2.24613	0.0246957	0.0929362	12	14	7	1	7	2	6	6	6	5	3	2
CP039930_1657008_1657132	16.3768	-0.975012	0.43448	-2.24409	0.0248266	0.0933644	13	18	14	9	12	16	4	12	9	18	31	35
EA667_018495|acyl-CoA_dehydrogenase	422.514	0.57363	0.255734	2.24308	0.0248918	0.0935454	602	372	437	466	490	679	354	347	521	310	278	287
EA667_013400|LysM_peptidoglycan-binding_domain-containing_protein	3791.29	-0.187296	0.0835669	-2.24127	0.0250085	0.0938463	4273	2847	4852	3673	3906	3940	3572	2969	3501	4145	4206	4005
EA667_012425|peptidoglycan-binding_protein	53.726	-0.522416	0.233102	-2.24115	0.0250166	0.0938463	51	41	67	53	53	53	37	35	46	77	70	61
EA667_003840|DUF3298_domain-containing_protein	153.966	0.368546	0.164453	2.24104	0.0250234	0.0938463	188	138	248	136	170	155	126	152	156	126	116	163
CP039930_1328382_1328438	1.8274	3.64482	1.62696	2.24026	0.0250738	NA	4	1	11	4	1	0	0	0	2	0	0	1
EA667_015105|GDYXXLXY_protein	96.2385	0.422753	0.188724	2.24006	0.0250871	0.0940206	102	74	132	106	125	103	102	113	112	69	66	74
EA667_019865|hypothetical_protein	279.965	-0.272376	0.121656	-2.2389	0.0251626	0.0941925	291	236	323	307	282	254	276	215	244	313	300	332
CP039930_3196912_3197058	187.343	0.354928	0.158533	2.23882	0.0251674	0.0941925	259	164	287	185	145	220	169	163	182	181	143	180
EA667_013420|alpha/beta_hydrolase	467.175	0.266887	0.119226	2.2385	0.0251885	0.094207	569	502	691	422	452	489	392	346	416	452	471	427
TG31307_2_3038856_3038919	44.3094	-0.605493	0.270736	-2.23647	0.0253211	0.0946381	39	32	32	55	45	58	42	46	39	57	42	46
EA667_017425|hypothetical_protein	31.6975	0.714252	0.319546	2.23521	0.0254037	0.0948596	36	34	47	27	41	33	38	37	28	16	18	32
EA667_012205|LamB/YcsF_family_protein	448.854	-0.267476	0.119686	-2.23481	0.0254295	0.0948596	479	311	470	517	407	459	500	434	473	434	508	441
EA667_009850|hypothetical_protein	835.174	0.216928	0.0970694	2.23477	0.0254324	0.0948596	959	679	1148	872	904	916	799	928	781	702	695	786
EA667_007205|HesA/MoeB/ThiF_family_protein	315.824	0.287926	0.128898	2.23376	0.0254991	0.0950221	405	269	476	353	256	317	322	275	314	285	268	302
CP039930_796027_796089	980.7	0.201456	0.0901941	2.23358	0.0255107	0.0950221	1133	799	1200	1198	1229	1067	1001	857	970	852	809	830
EA667_001410|DUF805_domain-containing_protein	51.8734	0.554388	0.248318	2.23258	0.0255768	0.0951792	63	41	70	58	46	60	62	67	60	31	34	43
TG31307_2_197236_197361	110.749	-0.394626	0.176771	-2.23241	0.0255877	0.0951792	116	84	105	122	134	104	91	111	98	120	122	127
EA667_019560|iron-containing_redox_enzyme_family_protein	174.161	0.335427	0.150393	2.23034	0.0257248	0.0956244	184	145	241	196	170	186	192	197	199	131	121	161
EA667_003270|DsbC_family_protein	219.105	0.289521	0.129856	2.22955	0.0257773	0.0957541	246	191	295	204	246	213	254	223	245	181	176	191
EA667_012705|hypothetical_protein	54.6013	0.556595	0.25007	2.22575	0.0260307	0.09663	70	36	76	65	68	64	69	64	51	27	34	51
CP039930_3120789_3120873	1438.38	0.257308	0.115842	2.2212	0.0263374	0.0977021	1452	977	1299	1934	2012	1617	2143	1979	1384	901	930	1043
EA667_009465|TetR/AcrR_family_transcriptional_regulator	46.522	-0.594239	0.267764	-2.21927	0.0264685	0.0981218	43	35	51	32	41	49	60	47	24	54	55	70
EA667_009220|3-oxoacid_CoA-transferase_subunit_A	31.0321	-0.699528	0.315286	-2.21871	0.0265065	0.0981962	39	21	29	27	33	29	18	14	29	53	34	45
EA667_018360|DoxX_family_protein	20.1805	0.869788	0.392111	2.21822	0.0265398	0.098253	30	17	27	19	22	23	26	22	25	8	12	17
TG31307_2_244325_244428	1.86399	-3.54826	1.59997	-2.2177	0.026575	NA	0	0	0	1	6	2	4	1	3	1	3	2
EA667_007430|transcriptional_regulator	187.078	0.317694	0.143314	2.21677	0.0266387	0.0985523	225	154	242	219	181	175	230	190	209	159	134	162
EA667_010460|TonB-dependent_siderophore_receptor	54.7173	0.603184	0.272292	2.21521	0.0267458	0.0988816	75	34	58	73	64	59	96	63	56	23	31	46
EA667_011285|glutathione_transferase	152.753	0.378875	0.171099	2.21436	0.026804	0.0990301	193	136	234	139	125	192	159	134	154	126	109	160
CP039930_2553984_2554253	1.77928	3.64052	1.64465	2.21355	0.02686	NA	0	4	3	1	0	1	3	7	2	0	0	0
EA667_012395|HAD-IIIA_family_hydrolase	453.851	-0.238742	0.107856	-2.21354	0.0268607	0.0991724	478	347	492	457	542	525	432	359	434	465	452	510
EA667_012240|hypothetical_protein	176.226	0.349292	0.157866	2.21259	0.0269258	0.0993458	227	142	238	176	187	191	185	206	166	139	109	187
CP039930_3629405_3629461	6063.62	-0.202494	0.0915324	-2.21226	0.0269485	0.0993625	6648	3581	5668	7071	7274	6707	7714	6824	5957	5543	5444	5592
EA667_001770|VWA_domain-containing_protein	59.8651	-0.542676	0.245638	-2.20925	0.0271571	0.100006	60	29	56	81	71	42	72	68	59	64	60	67
EA667_015660|MFS_transporter	20.8774	0.928402	0.42024	2.20922	0.0271596	0.100006	23	25	21	31	25	15	25	23	30	11	14	9
EA667_004705|alpha/beta_hydrolase	8.58336	-1.2492	0.565556	-2.20881	0.027188	0.100043	10	3	10	2	6	2	10	6	5	17	10	22
EA667_000710|alpha/beta_hydrolase	75.5614	0.481813	0.218169	2.20844	0.0272135	0.10006	70	58	98	87	75	72	116	93	109	40	47	61
TG31307_2_289436_289810	2191.06	-0.206192	0.0933747	-2.20822	0.0272292	0.10006	2001	1592	2240	2256	2365	2136	3020	2724	2077	1915	2136	2150
CP039930_2451215_2451268	207.937	0.313015	0.141785	2.20768	0.0272667	0.100131	279	190	230	251	237	227	215	188	189	181	173	164
TG31307_3_305205_305352	2.72476	-2.60299	1.17907	-2.20766	0.0272677	NA	0	0	3	3	3	2	4	1	1	6	4	6
EA667_018875|hypothetical_protein	30.9851	0.716127	0.32453	2.20666	0.0273377	0.100324	35	31	49	33	38	37	35	35	22	14	30	20
EA667_013095|GMC_family_oxidoreductase	109.408	-0.395423	0.179261	-2.20585	0.0273945	0.100465	90	65	115	108	94	109	157	137	132	88	104	132
EA667_016610|prolipoprotein_diacylglyceryl_transferase	161.918	-0.317387	0.144245	-2.20034	0.027783	0.101821	154	107	191	162	191	178	168	162	142	156	178	178
CP039930_603168_603263	39.6386	-0.626692	0.285177	-2.19756	0.0279808	0.102477	45	27	28	46	48	34	43	30	34	43	56	43
EA667_002945|TonB-dependent_receptor	67.4279	-0.479798	0.218836	-2.1925	0.0283431	0.103735	69	29	66	80	81	83	80	63	68	70	64	72
TG31307_2_121425_121650	10.427	-1.21714	0.555246	-2.19207	0.0283747	0.103781	7	9	4	10	8	8	8	8	16	18	14	12
EA667_014895|elongation_factor_Tu	56043.3	-0.184331	0.0841061	-2.19165	0.0284046	0.103806	57738	33706	53318	69084	71968	62684	73322	58482	55347	50554	49307	49424
EA667_013250|Lrp/AsnC_family_transcriptional_regulator	92.5301	0.423848	0.19341	2.19145	0.0284193	0.103806	116	75	128	113	102	103	95	105	79	65	59	93
EA667_001675|metal-dependent_hydrolase	12.6688	1.19743	0.546591	2.19073	0.0284714	0.103926	13	19	14	8	17	15	24	12	12	8	8	3
EA667_016440|phosphatase_PAP2_family_protein	76.4151	0.488445	0.223021	2.19013	0.0285146	0.104014	75	77	136	80	68	82	96	67	64	54	55	79
EA667_015185|ATP-dependent_dethiobiotin_synthetase_BioD	60.8232	-0.558197	0.254989	-2.1891	0.0285896	0.104219	45	40	37	74	86	78	100	66	48	53	59	55
EA667_004140|glycerol-3-phosphate_dehydrogenase	166.252	0.412507	0.188504	2.18832	0.0286461	0.104355	177	103	226	211	160	182	234	246	169	106	84	153
EA667_010655|iron-sulfur_cluster_assembly_protein_IscA	865.466	0.19215	0.0878612	2.18697	0.0287446	0.104644	1059	695	1059	927	909	841	969	899	921	697	721	834
EA667_002605|SDR_family_oxidoreductase	43.0068	0.616469	0.282067	2.18554	0.0288493	0.104955	76	38	51	48	50	46	31	40	45	37	34	27
EA667_003730|ammonium_transporter	8.24318	-1.43904	0.658994	-2.18369	0.0289848	0.105378	4	1	10	12	4	7	12	6	9	7	9	20
CP039930_3556806_3556959	132.149	-0.373808	0.171207	-2.18337	0.0290086	0.105395	116	89	110	137	156	152	146	167	151	107	140	129
EA667_017915|hypothetical_protein	45.5821	0.570973	0.261671	2.18203	0.0291076	0.105684	53	38	76	51	52	54	55	47	33	28	33	41
EA667_008965|metal-dependent_hydrolase	16.1525	-0.944141	0.432929	-2.18082	0.0291967	0.105937	10	13	15	16	12	16	11	20	11	15	26	27
CP039930_768761_769001	87.5296	0.434915	0.199453	2.18053	0.0292179	0.105944	130	95	122	76	82	99	88	53	77	75	88	73
TG31307_2_3319537_3319732	4.91944	2.15345	0.987599	2.18049	0.0292214	NA	8	6	5	12	2	4	6	8	5	0	2	2
CP039930_3112100_3112191	216.144	-0.315676	0.144848	-2.17936	0.029305	0.106189	187	133	204	270	278	229	308	240	194	204	206	185
EA667_002765|thioredoxin_TrxC	234.77	-0.274823	0.126456	-2.17326	0.0297606	0.107769	214	150	278	249	268	265	277	243	211	223	237	245
CP039930_299226_299523	137.194	-0.38589	0.177676	-2.17187	0.0298653	0.108048	115	91	153	120	181	141	151	118	166	127	149	152
CP039930_2788562_2788642	101.147	0.403569	0.18583	2.17171	0.0298772	0.108048	127	90	154	83	109	119	105	88	103	73	78	105
EA667_011515|hydroxymethylglutaryl-CoA_lyase	681.508	0.255528	0.117815	2.1689	0.0300905	0.108747	893	563	894	696	756	902	563	586	648	532	606	657
EA667_002180|YihA_family_ribosome_biogenesis_GTP-binding_protein	217.1	-0.274016	0.126431	-2.16732	0.0302103	0.109108	227	153	223	230	242	224	235	226	204	225	212	230
CP039930_252209_252609	35.9551	0.854097	0.39416	2.16688	0.030244	0.109114	43	14	66	55	46	40	66	50	15	21	20	18
EA667_006025|hypothetical_protein	1451.16	0.185582	0.085649	2.16678	0.0302519	0.109114	1612	1215	1796	1495	1501	1478	1687	1644	1481	1125	1149	1467
EA667_018365|DedA_family_protein	114.792	-0.392278	0.181265	-2.16411	0.0304556	0.109777	101	87	126	108	126	128	97	102	129	119	136	123
EA667_009560|nicotinate_phosphoribosyltransferase	35.1809	-0.621718	0.287537	-2.16222	0.0306014	0.11023	38	27	32	29	38	31	36	31	23	36	42	60
EA667_004405|ABC_transporter_permease	62.506	0.482811	0.223345	2.16173	0.0306392	0.110293	78	64	99	67	68	68	43	51	62	48	52	58
EA667_003015|cob(I)yrinic_acid_a,c-diamide_adenosyltransferase	82.456	-0.418698	0.193804	-2.16042	0.03074	0.110555	79	53	92	106	99	105	67	63	64	83	104	85
TG31307_3_342973_343205	10.2582	-1.20813	0.559253	-2.16026	0.0307524	0.110555	6	2	14	9	6	9	13	7	14	12	11	22
EA667_000385|HutD_family_protein	96.0701	-0.410483	0.190255	-2.15755	0.0309631	0.111239	78	54	113	105	104	107	119	101	96	105	77	113
CP039930_3353922_3354137	5.76301	1.8341	0.850714	2.15596	0.0310868	0.111575	13	6	4	9	5	6	10	8	4	3	0	3
EA667_011180|DUF2474_domain-containing_protein	35.525	0.639309	0.296549	2.15583	0.0310972	0.111575	36	36	61	39	47	51	35	30	22	23	29	26
EA667_002465|YihY_family_inner_membrane_protein	156.255	0.336102	0.155969	2.15493	0.0311672	0.111752	183	116	243	166	153	167	188	154	158	109	127	152
EA667_017515|50S_ribosomal_protein_L10	19619.7	-0.172187	0.0799304	-2.15421	0.0312238	0.111882	19083	11451	18657	24527	25333	21898	26957	22116	19842	16686	16516	17091
CP039930_1981824_1981897	4.72938	-1.82658	0.84885	-2.15183	0.0314107	NA	2	1	4	4	3	2	4	6	8	10	9	3
EA667_017190|bifunctional_demethylmenaquinone_methyltransferase/2-methoxy-6-polyprenyl-1,4-benzoquinol_methylase_UbiE	933.829	-0.181265	0.0842552	-2.15137	0.0314467	0.112607	883	680	1064	973	1092	1035	1107	889	902	851	910	965
CP039930_3178605_3178870	84.0679	-0.415601	0.19321	-2.15103	0.0314735	0.112629	67	64	85	91	91	84	101	86	81	90	90	85
CP039930_1865658_1865717	6.98117	-1.44807	0.673747	-2.14928	0.0316123	0.113052	9	1	5	4	6	2	4	10	6	15	14	7
TG31307_3_214652_214879	55.2052	-0.516803	0.240549	-2.14843	0.0316798	0.113219	54	46	82	45	49	38	26	50	32	82	75	80
EA667_006385|U32_family_peptidase	627.415	-0.672257	0.313407	-2.14499	0.0319533	0.114122	471	363	848	499	459	765	563	545	666	631	621	1165
CP039930_87207_87714	419.781	-0.242972	0.113327	-2.14398	0.0320347	0.114338	415	279	426	440	498	428	534	509	369	394	395	422
EA667_004825|molecular_chaperone	367.914	0.237348	0.110769	2.14273	0.0321348	0.11462	412	291	428	404	388	435	440	438	371	292	272	315
EA667_005305|YbdD/YjiX_family_protein	168.653	0.346603	0.161854	2.14146	0.0322372	0.114911	227	126	188	175	233	198	189	155	185	110	140	138
CP039930_3432554_3432676	100.701	-0.374827	0.175078	-2.14091	0.0322812	0.114993	104	68	98	98	107	109	121	104	91	107	107	106
CP039930_830738_830793	18.7695	0.864036	0.404558	2.13576	0.0326993	0.116406	28	17	29	19	19	13	31	22	16	15	8	14
EA667_000575|hypothetical_protein	35.2689	-0.649428	0.304125	-2.1354	0.0327286	0.116435	32	14	34	41	44	31	52	42	29	41	31	41
EA667_015370|HlyD_family_secretion_protein	77.9379	0.450972	0.211235	2.13493	0.0327665	0.116494	106	71	103	77	74	106	73	72	78	67	66	54
CP039930_2986576_2986631	3.75447	2.39632	1.1226	2.13462	0.0327917	NA	4	6	7	1	1	6	4	4	9	1	2	0
EA667_001160|MFS_transporter	729.576	-0.199402	0.0934984	-2.13268	0.0329512	0.117074	765	535	778	760	739	853	787	703	734	719	729	737
EA667_000940|UDP-3-O-acyl-N-acetylglucosamine_deacetylase	280.96	-0.252653	0.118515	-2.13182	0.033022	0.117182	262	170	313	305	319	284	345	311	310	245	264	297
EA667_019370|metalloregulator_ArsR/SmtB_family_transcription_factor	12.8012	1.06629	0.500184	2.13179	0.0330244	0.117182	14	18	17	11	10	13	16	17	16	9	4	9
EA667_005645|DUF4105_domain-containing_protein	287.963	0.287225	0.13481	2.1306	0.033122	0.117452	293	236	393	336	315	274	327	313	332	222	256	210
TG31307_2_220830_221220	9.92079	1.19777	0.562397	2.12976	0.0331917	0.117552	28	13	11	13	7	5	8	7	7	8	4	9
EA667_019495|molecular_chaperone	11.7215	1.25249	0.588097	2.12974	0.0331932	0.117552	12	9	21	13	15	20	21	12	8	6	0	10
CP039930_1207451_1207807	112.45	-0.366686	0.172226	-2.1291	0.0332464	0.117664	117	70	111	126	126	103	136	128	99	114	117	119
EA667_012210|divalent_metal_cation_transporter	821.484	-0.22236	0.104465	-2.12857	0.03329	0.117742	746	478	866	925	839	744	1153	1120	944	657	707	849
EA667_008950|nuclear_transport_factor_2_family_protein	23.3055	-0.786598	0.36981	-2.12703	0.0334174	0.118116	19	21	19	17	19	24	12	28	21	30	36	29
CP039930_2596275_2596499	102.867	0.382176	0.179731	2.12638	0.0334715	0.118231	142	79	156	99	114	98	105	112	92	79	98	84
EA667_010755|Zn-dependent_oligopeptidase	134.466	-0.348825	0.16415	-2.12504	0.0335835	0.118519	131	83	134	133	144	160	139	164	140	120	140	144
EA667_017890|ferrous_iron_transporter_B	91.5802	-0.406656	0.191378	-2.12488	0.0335964	0.118519	75	60	110	112	103	95	97	74	90	92	108	95
EA667_012545|hypothetical_protein	177.764	0.331375	0.156029	2.12381	0.0336861	0.118757	212	148	264	175	174	159	243	197	151	125	138	189
CP039931_48946_49003	5.27675	2.02693	0.954497	2.12356	0.0337071	0.118757	10	3	5	11	11	7	3	6	6	1	1	2
EA667_001405|3'-5'_exonuclease_domain-containing_protein_2	19.1391	-0.900928	0.424394	-2.12286	0.0337656	0.118886	12	4	20	23	23	25	27	18	24	17	15	28
EA667_010650|Fe-S_cluster_assembly_scaffold_IscU	837.211	0.196595	0.092665	2.12156	0.0338743	0.119121	1035	627	1027	893	895	856	1031	914	811	657	653	828
CP039930_1995773_1995970	52.1772	-0.542698	0.255803	-2.12155	0.0338759	0.119121	39	44	73	42	48	54	42	48	28	63	57	89
CP039930_3058812_3059011	142.764	0.352536	0.166361	2.1191	0.0340817	0.119768	185	141	172	158	137	174	133	128	140	102	118	141
CP039930_3203145_3203201	202.378	-0.340862	0.160904	-2.11842	0.0341399	0.119895	180	134	234	217	195	198	302	215	157	211	224	195
EA667_009400|MFS_transporter	17.4022	-0.864461	0.408239	-2.11754	0.0342144	0.12008	17	6	18	17	25	14	17	15	16	20	21	26
TG31307_2_87928_88477	26.6505	0.748627	0.353611	2.11709	0.034252	0.120111	28	37	49	26	11	25	26	32	23	21	20	22
CP039930_380424_380793	51.2922	-0.564074	0.266461	-2.11691	0.0342673	0.120111	37	22	64	53	48	42	87	64	49	53	45	65
EA667_006320|alpha/beta_fold_hydrolase	39.777	0.607914	0.287283	2.11608	0.0343379	0.120227	39	32	49	49	38	41	61	53	53	23	26	23
CP039930_106862_107192	25.262	-0.778419	0.367901	-2.11584	0.0343587	0.120227	17	13	22	32	28	25	23	37	27	37	23	21
EA667_014790|class_II_glutamine_amidotransferase	195.806	0.337035	0.159298	2.11575	0.0343662	0.120227	189	170	273	231	194	196	267	212	200	140	124	196
TG31307_2_3138157_3138235	5.02811	1.91537	0.905532	2.11519	0.0344138	0.120316	7	6	12	5	2	3	3	2	15	1	3	2
EA667_003815|polyprenyl_synthetase_family_protein	314.926	-0.258321	0.122171	-2.11442	0.0344794	0.120469	358	219	312	329	351	329	310	304	329	306	303	365
EA667_014515|dihydrodipicolinate_synthase_family_protein	4.8585	1.73546	0.821039	2.11374	0.0345377	NA	8	5	13	4	3	6	3	3	8	2	2	3
EA667_011875|APC_family_permease	5.69654	1.68163	0.795787	2.11317	0.0345866	0.120766	7	5	13	7	8	8	5	4	7	0	4	3
CP039930_1578274_1578572	64.4745	0.476307	0.22547	2.11251	0.0346429	0.120885	91	57	102	49	62	80	65	69	49	48	60	55
EA667_005075|thiamine_phosphate_synthase	190.273	-0.286872	0.135922	-2.11056	0.0348101	0.121391	199	142	186	206	198	196	217	190	177	180	201	210
EA667_007145|hypothetical_protein	101.494	0.395543	0.187532	2.1092	0.0349272	0.121722	146	85	140	104	89	128	108	85	97	74	81	102
CP039933_3733_3826	66.5401	0.477649	0.226573	2.10814	0.0350187	0.121963	87	55	69	77	78	82	70	79	75	43	52	44
EA667_009360|amidohydrolase	43.9449	-0.580145	0.275263	-2.10761	0.035065	0.122047	32	36	45	47	32	43	59	42	36	45	44	68
EA667_017230|Na+/H+_antiporter_subunit_C	162.067	-0.30218	0.143474	-2.10616	0.0351901	0.122404	178	100	187	163	177	181	176	148	142	173	173	173
EA667_014700|thioesterase_family_protein	148.774	-0.337977	0.160668	-2.10358	0.0354154	0.12311	128	100	151	136	155	155	200	168	174	114	144	182
CP039930_1494167_1494332	4.68751	-1.82727	0.868736	-2.10336	0.0354343	NA	1	1	4	7	9	6	4	4	2	8	7	4
EA667_002120|STAS_domain-containing_protein	551.901	0.195286	0.0928784	2.1026	0.0355006	0.123327	601	412	698	597	621	573	647	626	601	439	445	476
EA667_013575|Arc_family_DNA-binding_protein	107.148	0.40644	0.193333	2.10228	0.0355283	0.123345	110	88	160	128	114	110	154	113	92	88	63	95
EA667_012940|hypothetical_protein	6.76521	-1.62488	0.773421	-2.1009	0.0356495	0.123688	4	0	4	6	10	11	13	7	7	3	8	11
EA667_009585|hypothetical_protein	12.7453	-0.98844	0.470786	-2.09955	0.0357682	0.124021	11	8	16	10	9	4	6	8	16	21	19	23
CP039930_1033400_1033535	254.155	-0.299065	0.142531	-2.09825	0.0358833	0.124341	275	212	236	249	205	231	286	300	235	251	264	312
TG31307_2_3000277_3000341	7.23498	1.42175	0.678084	2.09672	0.0360188	0.124731	8	7	18	5	9	9	10	9	4	5	4	2
EA667_008780|hypothetical_protein	1020.84	-0.239906	0.114443	-2.0963	0.0360558	0.124781	1130	844	1395	784	867	877	835	1002	915	1121	1043	1479
EA667_017650|phosphate_signaling_complex_protein_PhoU	86.6652	-0.420313	0.200565	-2.09564	0.0361138	0.124902	95	48	78	101	118	82	91	93	80	91	80	98
EA667_012400|KpsF/GutQ_family_sugar-phosphate_isomerase	1068.87	-0.180471	0.0861434	-2.09501	0.0361703	0.124997	1102	890	1251	1091	1095	1154	1042	928	969	1038	1133	1216
EA667_018730|EpsG_family_protein	30.6319	-0.662511	0.316261	-2.09482	0.0361868	0.124997	29	16	40	28	18	36	27	23	32	40	36	45
EA667_003995|neutral_zinc_metallopeptidase	560.019	0.209488	0.100028	2.0943	0.0362333	0.125031	703	443	786	576	633	629	548	464	531	495	522	496
EA667_017470|OmpW_family_protein	18382.8	-0.196048	0.0936151	-2.0942	0.0362424	0.125031	17139	13379	22282	17587	18022	21354	19303	19851	18747	16965	17518	20819
EA667_002785|sulfurtransferase	874.099	0.17992	0.0859623	2.09301	0.0363487	0.125318	1006	691	1136	888	944	1011	952	847	896	735	719	826
EA667_000770|type_VI_secretion_system_tip_protein_VgrG	46.6248	0.633494	0.302744	2.09251	0.0363932	0.125393	64	26	52	70	69	56	69	59	32	34	29	19
CP039930_1299947_1300084	957.405	-0.232538	0.111183	-2.09148	0.0364849	0.125629	924	598	919	1208	1130	917	1382	978	1010	788	914	916
EA667_015300|hypothetical_protein	424.836	0.242326	0.116272	2.08413	0.037148	0.127832	425	277	514	547	481	423	590	510	515	288	300	344
TG31307_3_266984_267259	1.88921	-3.29191	1.58024	-2.08317	0.0372356	NA	0	0	0	2	1	2	5	4	4	2	2	1
CP039930_963436_963745	441.603	-0.25147	0.120834	-2.08112	0.0374233	0.128699	506	384	539	415	409	431	363	293	400	552	517	492
EA667_005920|phage_head_morphogenesis_protein	18.4196	0.861996	0.41435	2.08036	0.0374927	0.128856	19	22	30	19	19	12	23	17	26	15	11	10
EA667_015140|3-oxoacyl-ACP_reductase_FabG	3537.41	0.221099	0.10647	2.07663	0.0378354	0.129885	3835	2220	3234	4711	4966	4091	5283	4377	3531	2397	2474	2392
EA667_000180|hypothetical_protein	56.4106	-0.553006	0.266305	-2.07659	0.0378397	0.129885	43	37	32	70	70	60	83	77	59	66	36	51
CP039930_3477754_3477936	278.738	0.256649	0.123616	2.07618	0.0378778	0.129935	322	238	343	268	287	299	324	317	298	202	214	279
EA667_019430|taurine_ABC_transporter_substrate-binding_protein	41.1745	0.558835	0.269423	2.07419	0.0380615	0.130483	65	38	74	34	33	24	46	48	32	35	27	47
EA667_000605|imidazolonepropionase	38.2895	-0.625386	0.302093	-2.07018	0.0384356	0.131683	26	19	29	40	63	51	55	39	42	36	40	28
EA667_001255|hypothetical_protein	23.9214	0.75234	0.363691	2.06862	0.0385813	0.132099	24	24	46	25	32	32	21	21	18	14	12	25
CP039930_2215744_2215944	18.4044	0.845182	0.40865	2.06823	0.0386186	0.132103	23	15	36	18	30	23	18	15	13	16	9	12
CP039930_2856965_2857224	12.3898	-0.993989	0.480664	-2.06795	0.0386448	0.132103	11	4	13	9	17	14	13	12	8	16	15	19
CP039930_1529791_1530016	9.76487	-1.13541	0.549082	-2.06784	0.0386549	0.132103	8	8	5	7	11	11	7	8	7	19	15	9
EA667_005990|SH3_domain-containing_protein	70.1386	0.443247	0.214814	2.0634	0.0390746	0.133454	84	53	79	70	71	77	110	89	81	47	51	47
EA667_011595|IclR_family_transcriptional_regulator	108.587	-0.38321	0.186023	-2.06002	0.0393971	0.134471	103	67	112	118	134	123	137	75	118	105	110	120
EA667_011015|helix-turn-helix_transcriptional_regulator	171.117	0.303442	0.147476	2.05758	0.0396309	0.135183	205	190	255	153	199	173	137	135	131	166	158	162
CP039930_962004_962095	68.9395	-0.448252	0.217892	-2.05722	0.0396648	0.135183	70	51	61	68	77	78	71	61	65	90	75	63
CP039930_2306110_2306368	39.8887	0.675275	0.328271	2.05707	0.0396798	0.135183	31	30	49	59	46	36	80	64	35	24	18	21
CP039930_60688_60793	35.143	0.676067	0.328743	2.05652	0.0397321	0.135277	41	50	53	24	32	33	27	25	50	24	23	38
TG31307_2_3266738_3266881	50.9756	0.508683	0.247633	2.05418	0.0399583	0.135963	73	43	74	47	46	53	65	61	40	42	45	34
CP039930_1499691_1499749	9.52526	1.16918	0.569619	2.05256	0.0401152	0.136412	16	11	12	12	9	11	10	12	7	7	4	5
EA667_009195|NAD-dependent_phenylacetaldehyde_dehydrogenase	8.34564	-1.22792	0.598713	-2.05093	0.0402738	0.136866	4	6	11	2	4	7	11	2	7	18	10	17
EA667_006580|histidine_phosphatase_family_protein	240.677	-0.284818	0.138914	-2.05032	0.0403333	0.136983	228	176	315	243	283	251	222	176	225	293	250	252
EA667_006870|hypothetical_protein	9.97436	-1.15379	0.563154	-2.0488	0.0404819	0.137267	6	2	15	8	5	8	16	12	5	12	14	19
EA667_012270|MFS_transporter	12.5021	1.19093	0.581345	2.04857	0.0405037	0.137267	10	9	16	20	11	17	21	26	11	3	5	6
EA667_019500|fimbrial_biogenesis_outer_membrane_usher_protein	15.5435	1.02749	0.501567	2.04856	0.0405051	0.137267	18	12	19	24	22	14	27	25	10	3	9	10
EA667_015740|hypothetical_protein	167.037	0.315155	0.153852	2.04843	0.0405174	0.137267	181	135	222	181	163	151	219	225	167	112	134	149
EA667_008325|ANTAR_domain-containing_protein	3.52914	-2.71192	1.32474	-2.04713	0.0406448	NA	0	2	0	4	0	9	3	7	4	2	3	8
EA667_018020|long-chain-fatty-acid--CoA_ligase	2540.57	-0.140124	0.0684864	-2.04601	0.0407552	0.137987	2806	1815	2792	2602	2653	2693	2985	2544	2512	2457	2443	2553
CP039930_72254_72553	111.693	0.419627	0.205167	2.0453	0.0408257	0.13814	125	106	108	143	131	139	129	153	88	71	70	96
EA667_004695|sulfate_ABC_transporter_permease_subunit_CysW	9.63387	-1.26378	0.618531	-2.04319	0.0410338	0.138759	7	2	12	9	2	7	14	4	15	10	23	11
EA667_005975|HK97_gp10_family_phage_protein	2.446	2.84589	1.39408	2.04141	0.0412099	NA	9	3	4	1	5	0	0	2	4	1	1	0
CP039930_3114251_3114382	728.843	-0.221401	0.108667	-2.03741	0.0416086	0.14053	730	688	828	669	745	706	681	614	644	811	832	794
EA667_009840|catalase	51.7845	0.526715	0.258522	2.03741	0.0416091	0.14053	59	48	77	50	59	53	54	47	67	25	45	47
CP039930_3024584_3024916	13.9165	0.992334	0.487467	2.03569	0.0417812	0.141024	15	12	26	20	17	9	21	15	13	10	8	6
CP039930_974948_975026	324.485	-0.244685	0.120274	-2.0344	0.0419113	0.141376	353	270	332	370	339	344	317	257	285	355	349	340
EA667_006240|elongation_factor_Ts	4205.5	-0.187571	0.0922216	-2.03392	0.0419594	0.141451	4311	2639	3947	5188	5368	4569	5605	4421	3989	3876	3741	3692
EA667_014725|VOC_family_protein	66.9524	0.44359	0.218804	2.02735	0.0426271	0.143614	83	50	100	80	62	74	72	68	76	47	52	56
EA667_011900|(2Fe-2S)-binding_protein	4.23746	1.93219	0.953982	2.0254	0.0428265	NA	10	4	7	5	7	4	6	0	5	2	0	3
CP039930_352587_352707	134.085	0.325011	0.160549	2.02437	0.0429321	0.144552	177	137	166	141	150	140	133	110	115	99	129	126
CP039930_566010_566095	13.123	-0.997252	0.492914	-2.02318	0.043055	0.144877	8	4	12	20	20	16	17	11	10	18	12	13
EA667_018380|ParA_family_protein	323.374	0.224982	0.11129	2.02158	0.04322	0.145343	375	247	416	305	355	337	413	358	335	245	264	300
CP039930_3614678_3614891	2.87749	2.7538	1.36321	2.02009	0.0433745	NA	8	2	5	1	9	5	4	0	1	0	0	2
TG31307_3_113598_113712	52.812	-0.48926	0.242233	-2.01979	0.0434054	0.145876	43	38	63	65	52	49	44	47	51	52	61	72
EA667_016625|thymidylate_synthase	467.304	-0.197556	0.097845	-2.01907	0.04348	0.146037	495	326	512	522	541	490	537	425	438	460	460	474
EA667_000565|hypothetical_protein	145.146	-0.300926	0.149231	-2.01651	0.0437468	0.146808	145	91	170	145	162	145	166	154	134	147	142	165
EA667_009680|OprD_family_porin	28.5058	-0.674363	0.334447	-2.01635	0.0437631	0.146808	30	19	29	25	32	13	21	33	26	29	38	47
EA667_000410|aminoglycoside_nucleotidyltransferase_ANT(2'')-Ia	1819.62	-0.151217	0.0750181	-2.01574	0.0438268	0.146914	1843	1240	1887	2147	2171	2107	2212	1731	1789	1572	1676	1799
CP039930_3032110_3032273	258.879	0.327539	0.162507	2.01553	0.0438486	0.146914	280	202	357	264	255	254	347	338	262	153	167	292
EA667_017830|P-II_family_nitrogen_regulator	929.257	-0.180175	0.0894606	-2.01402	0.0440078	0.147305	995	657	947	940	960	1067	1152	962	911	873	852	974
EA667_004375|DNA_gyrase_subunit_A	4121.83	-0.179761	0.0892596	-2.01391	0.044019	0.147305	4600	3128	4356	4251	4786	4342	4348	3617	3929	4260	4408	3871
CP039930_3252108_3252222	1.23561	3.46386	1.72197	2.01157	0.0442654	NA	1	1	5	2	4	2	0	0	1	0	0	0
EA667_017195|hypothetical_protein	513.67	-0.196872	0.0978824	-2.01131	0.044293	0.148131	563	373	555	523	570	507	597	477	503	491	539	532
CP039930_3588729_3589224	50.2136	0.561456	0.279301	2.01022	0.0444083	0.148426	60	39	57	64	53	60	43	75	65	27	28	42
EA667_015275|tRNA-dihydrouridine_synthase_C	143.364	-0.309256	0.153869	-2.00986	0.0444458	0.14846	156	98	143	153	180	167	154	122	118	156	150	143
EA667_016430|nucleoside-diphosphate_kinase	2056	-0.196911	0.097986	-2.00958	0.0444756	0.148469	2116	1410	1977	2372	2687	2163	2573	2122	1830	1995	1951	1830
TG31307_2_3210183_3210404	2.61404	2.95398	1.47041	2.00895	0.0445427	NA	2	3	4	2	1	5	4	4	6	0	0	1
EA667_006280|rod_shape-determining_protein_RodA	404.768	-0.245346	0.12219	-2.00791	0.0446532	0.148971	504	357	489	382	408	387	290	258	313	514	521	431
EA667_004330|DNA_repair_protein_RadA	167.709	-0.308575	0.153831	-2.00594	0.0448632	0.14958	157	88	181	189	197	174	243	187	162	154	142	181
EA667_014625|hypothetical_protein	288.152	0.236065	0.117767	2.00451	0.045015	0.149995	339	266	390	267	262	290	345	289	273	256	229	291
EA667_004145|phosphoenolpyruvate_carboxykinase_(GTP)	5691.62	0.207554	0.103599	2.00343	0.0451313	0.150225	7310	4833	6569	6279	7285	6478	5923	4497	5190	5266	5163	4413
EA667_016670|coniferyl_aldehyde_dehydrogenase	788.36	-0.458264	0.228748	-2.00336	0.0451389	0.150225	589	440	920	830	683	843	1039	1045	800	659	640	1129
CP039930_237968_238230	13.4576	-0.964279	0.482128	-2.00005	0.0454954	0.151319	9	10	8	13	15	16	17	13	11	12	24	13
CP039930_3051799_3051910	301.347	-0.268281	0.134165	-1.99963	0.0455405	0.151377	269	251	288	350	358	302	361	312	246	296	289	321
EA667_017025|TIGR03862_family_flavoprotein	98.1348	-0.369923	0.185085	-1.99867	0.0456441	0.151629	96	77	87	101	120	121	102	85	85	107	108	95
TG31307_2_3615671_3615916	3.35334	2.12647	1.06413	1.99832	0.0456815	NA	3	6	10	2	1	6	5	2	2	3	0	1
EA667_010855|SRPBCC_family_protein	96.6208	0.373614	0.186985	1.99809	0.045707	0.151746	122	104	134	80	112	94	105	90	72	83	94	79
CP039930_976892_976982	25.0539	0.692234	0.346672	1.9968	0.0458471	0.152119	42	22	53	30	16	22	16	21	20	24	15	26
CP039932_22384_22443	20.6091	0.787866	0.394723	1.996	0.0459343	0.152316	29	13	31	22	29	20	22	30	21	13	11	14
CP039930_2779480_2779618	30.1152	-0.684064	0.342871	-1.99511	0.0460311	0.152462	28	19	29	37	29	29	30	19	31	26	57	28
TG31307_2_3180850_3180990	11.0195	1.10052	0.551618	1.99508	0.046034	0.152462	20	8	15	13	14	17	10	8	13	5	10	3
CP039930_3113253_3113352	2341.68	-0.182621	0.0915546	-1.99467	0.0460793	0.152519	2395	1831	2222	2524	2871	2532	2686	2275	2238	2268	2295	2220
EA667_004900|DUF1615_domain-containing_protein	272.474	-0.238113	0.119534	-1.99201	0.04637	0.153388	280	197	320	253	316	298	289	241	254	287	259	312
EA667_013605|DUF4258_domain-containing_protein	329.231	0.257936	0.129674	1.98912	0.0466883	0.154348	364	287	539	314	302	341	322	331	303	279	268	358
EA667_003255|NADH:flavin_oxidoreductase/NADH_oxidase	277.91	0.271969	0.136779	1.98839	0.0467685	0.154433	367	212	382	293	311	380	243	229	257	260	232	227
EA667_001185|amino_acid_permease	623.482	0.22149	0.111392	1.98837	0.0467705	0.154433	734	366	682	690	760	731	924	717	693	429	454	495
EA667_019110|DsbC_family_protein	85.0461	0.371633	0.187028	1.98704	0.0469176	0.154825	108	82	136	85	89	90	79	59	76	76	70	84
EA667_016305|acetolactate_synthase_3_large_subunit	1863.27	-0.140951	0.0710081	-1.985	0.0471444	0.15548	1895	1233	2161	2095	2116	2125	2104	1863	1827	1743	1654	1896
EA667_018790|FKBP-type_peptidyl-prolyl_cis-trans_isomerase	760.755	0.209697	0.105704	1.98382	0.047276	0.15582	954	579	989	786	936	902	727	639	792	627	662	689
EA667_001195|4-aminobutyrate--2-oxoglutarate_transaminase	1606.17	0.184428	0.0931116	1.98072	0.0476223	0.156867	1820	1031	1814	2002	1994	1960	2203	1675	1529	1217	1233	1259
EA667_019460|crossover_junction_endodeoxyribonuclease_RuvC	63.5751	0.460597	0.232642	1.97986	0.0477198	0.157071	65	51	65	75	74	57	101	81	87	43	37	41
EA667_001060|cysteine_hydrolase	15.3608	0.909652	0.459509	1.97962	0.0477463	0.157071	22	15	18	19	17	18	27	15	11	7	9	11
CP039930_2009705_2009964	13.9217	-0.937278	0.473515	-1.9794	0.0477704	0.157071	17	14	9	5	15	4	5	11	10	28	21	23
CP039930_2137632_2137868	5.30067	-1.50508	0.760974	-1.97783	0.0479479	0.157559	2	4	3	6	8	3	5	6	2	8	7	9
EA667_017530|transcription_termination/antitermination_protein_NusG	19173.1	-0.169799	0.0858952	-1.97681	0.0480631	0.157843	18874	14809	18127	21562	22791	20411	23671	19568	18517	17714	18345	18070
EA667_008435|hypothetical_protein	55.2094	-0.446837	0.226254	-1.97493	0.0482758	0.15842	50	46	73	41	52	42	56	46	46	60	74	77
CP039930_622687_622821	97.1674	0.365593	0.185134	1.97475	0.0482965	0.15842	116	75	115	129	117	108	120	92	101	63	74	80
CP039930_882605_882694	4.56333	1.95202	0.989457	1.97282	0.0485166	NA	8	1	14	6	7	4	7	7	0	2	3	0
EA667_009525|ABC_transporter_substrate-binding_protein	6.29926	-1.26398	0.640792	-1.97253	0.0485487	0.159151	5	4	8	5	4	3	1	4	3	17	8	12
EA667_005070|DUF962_domain-containing_protein	5.04186	-1.52513	0.773325	-1.97217	0.0485905	0.159193	3	3	3	3	8	2	5	5	4	10	5	9
EA667_010875|6-carboxytetrahydropterin_synthase	572.541	0.206298	0.10463	1.9717	0.0486442	0.159204	618	505	668	651	630	689	610	623	527	473	435	527
CP039930_2115986_2116239	100.117	0.44933	0.227911	1.97151	0.0486653	0.159204	112	76	97	164	247	167	85	36	62	72	55	65
EA667_018485|enoyl-CoA_hydratase/isomerase_family_protein	248.95	0.330485	0.167652	1.97126	0.0486945	0.159204	353	205	284	243	348	342	205	186	256	208	170	236
CP039930_1314422_1314482	60.7746	-0.487069	0.247103	-1.97112	0.0487103	0.159204	65	23	56	79	78	71	85	56	53	69	49	63
EA667_011580|SDR_family_oxidoreductase	4.83235	1.93883	0.984322	1.96971	0.0488721	NA	9	3	5	8	4	13	3	4	7	1	2	1
EA667_004910|nitronate_monooxygenase	152.818	0.320282	0.162714	1.96837	0.0490252	0.160137	183	107	244	141	147	167	184	157	161	117	112	156
CP039930_3572424_3572639	801.463	-0.213077	0.108283	-1.96779	0.0490926	0.160262	797	629	917	833	839	769	964	768	693	798	940	750
EA667_009455|HlyD_family_secretion_protein	18.5935	-0.871479	0.44294	-1.96749	0.0491271	0.160279	24	13	8	20	16	17	16	18	13	11	33	33
CP039930_3853352_3853757	587.292	0.272853	0.138742	1.96662	0.0492266	0.160507	502	427	844	636	737	696	720	757	560	375	423	534
EA667_000795|DNA_topoisomerase_IV_subunit_B	482.987	-0.205631	0.104659	-1.96478	0.0494401	0.161039	463	306	559	524	560	547	576	499	467	440	505	441
CP039930_2909670_2909774	76.8113	-0.401141	0.204174	-1.9647	0.0494484	0.161039	88	57	71	78	80	64	75	87	63	86	86	90
EA667_014135|monofunctional_biosynthetic_peptidoglycan_transglycosylase	181.547	-0.299845	0.15267	-1.964	0.0495299	0.161208	207	114	198	176	161	226	195	183	165	172	194	214
CP039930_1169212_1169799	5.6058	-1.6666	0.848762	-1.96357	0.0495804	0.161277	5	1	2	5	7	2	17	3	4	10	3	10
TG31307_2_3181275_3181337	42.2835	0.519935	0.264896	1.96278	0.0496712	0.161476	46	45	65	40	39	41	44	46	46	29	37	34
TG31307_2_3243091_3243333	56.4882	0.489731	0.249883	1.95984	0.0500141	0.162402	60	42	75	61	71	88	65	55	63	35	29	51
EA667_000720|phosphate_regulon_transcriptional_regulatory_protein_PhoB	295.831	-0.226888	0.115769	-1.95983	0.0500154	0.162402	298	218	333	307	343	309	324	293	255	321	267	321
CP039930_1248209_1248403	284.877	0.336094	0.171543	1.95924	0.0500846	0.16253	294	259	339	279	260	335	405	349	292	170	172	318
EA667_018750|translocase	295.337	-0.235314	0.120165	-1.95825	0.0502007	0.16281	311	208	324	323	334	282	338	280	278	325	299	280
CP039930_3925161_3925328	437.43	-0.222361	0.113629	-1.95691	0.0503576	0.163222	404	243	453	488	481	508	633	549	435	391	352	419
EA667_003045|metal-dependent_hydrolase	28.1993	-0.636123	0.325196	-1.95612	0.0504509	0.163427	21	15	33	27	24	31	40	32	23	28	35	34
TG31307_3_2632_2823	0.959452	-3.78765	1.9372	-1.95521	0.0505578	NA	0	0	0	0	0	3	0	0	1	4	2	1
CP039930_2760037_2760880	27.0812	0.688067	0.352054	1.95444	0.0506496	0.163974	29	17	36	34	36	43	40	25	30	15	15	16
TG31307_2_3304073_3304191	14.4121	-0.923136	0.472413	-1.95409	0.0506911	0.164011	7	6	15	19	17	13	14	18	18	11	19	18
CP039930_1135036_1135090	7.68133	-1.20791	0.618235	-1.95381	0.0507236	0.164019	4	7	6	6	8	3	3	9	7	13	9	15
EA667_016285|hypothetical_protein	69.8567	0.409792	0.209806	1.95319	0.0507968	0.164159	88	67	94	72	81	67	77	59	72	48	64	60
EA667_001520|cation_transporter	131.169	0.316207	0.162101	1.95067	0.051096	0.165028	139	95	171	161	162	159	157	141	129	100	82	114
EA667_014565|restriction_endonuclease_subunit_S	296.711	0.243895	0.125135	1.94906	0.0512885	0.165552	356	229	375	276	331	330	354	329	302	264	256	216
EA667_009485|LysR_family_transcriptional_regulator	15.5282	-0.842698	0.4325	-1.94843	0.0513631	0.165695	10	14	13	15	14	17	12	9	18	19	22	21
CP039932_13995_14313	17.1618	-0.834666	0.428533	-1.94773	0.0514474	0.165869	10	11	19	11	16	20	16	26	12	26	20	19
EA667_009025|3-oxoadipate_enol-lactonase	20.5984	-0.73746	0.378796	-1.94685	0.0515524	0.16611	23	19	11	15	17	17	24	15	20	28	27	28
TG31307_2_3401595_3401809	72.8776	0.455764	0.234295	1.94526	0.0517438	0.166628	102	69	77	78	75	68	62	102	81	59	53	55
EA667_005960|hypothetical_protein	50.4065	0.544163	0.279877	1.94429	0.0518599	0.166904	57	33	71	62	44	63	83	64	47	23	29	48
CP039930_3136213_3136508	606.272	-0.255101	0.131333	-1.94241	0.052088	0.167539	500	543	718	526	594	633	585	590	639	631	666	657
CP039930_3509503_3509638	177.265	-0.28089	0.144653	-1.94182	0.0521586	0.167668	187	123	181	208	208	179	170	171	175	168	197	180
EA667_004585|protein_TolR	316.095	0.22597	0.116497	1.93971	0.0524146	0.168392	388	269	443	292	374	317	305	292	307	292	267	298
EA667_014420|acyl-CoA_thioesterase	224.565	0.254867	0.13142	1.93933	0.0524615	0.168444	259	158	265	241	272	253	310	227	248	167	167	186
EA667_009605|acid_phosphatase	9.63674	-1.07881	0.556368	-1.93902	0.0524994	0.168466	7	3	13	4	10	10	5	11	10	14	16	13
EA667_010840|integration_host_factor_subunit_beta	991.711	0.17046	0.0879271	1.93865	0.0525442	0.168511	1266	794	1305	989	1046	1146	973	916	914	905	910	901
EA667_009265|FAH_family_protein	3.07027	-2.20504	1.13769	-1.93817	0.0526019	NA	1	0	3	0	7	3	2	1	4	9	3	4
EA667_002400|M3_family_metallopeptidase	2040.35	0.224783	0.116013	1.93756	0.0526765	0.168837	2409	1585	3091	1967	1763	2093	2284	2116	2109	1640	1519	2333
EA667_000950|M23_family_peptidase	1580.63	-0.162423	0.0838632	-1.93677	0.052774	0.16905	1843	1203	1791	1559	1673	1547	1616	1373	1575	1672	1553	1725
EA667_019520|LysR_family_transcriptional_regulator	18.6906	0.830393	0.42915	1.93497	0.0529938	0.169467	16	26	34	12	25	22	23	16	13	8	13	19
CP039930_664552_664610	85.2656	-0.38184	0.197338	-1.93495	0.052996	0.169467	72	65	86	88	111	99	91	85	67	89	98	80
EA667_010725|3'(2'),5'-bisphosphate_nucleotidase_CysQ	341.723	0.244116	0.126167	1.93487	0.0530061	0.169467	393	344	408	338	340	321	392	346	347	335	256	307
TG31307_4_48211_48529	16.8431	-0.821486	0.424608	-1.93469	0.0530281	0.169467	10	12	14	21	14	21	14	19	18	17	18	24
EA667_012815|hypothetical_protein	16.3629	-0.923485	0.477554	-1.93378	0.0531399	0.169725	9	12	16	9	12	37	12	13	11	23	18	24
EA667_013510|phosphoethanolamine--lipid_A_transferase	15.5186	-0.822006	0.425204	-1.9332	0.0532113	0.169854	13	10	14	22	17	18	14	6	13	19	19	22
EA667_004985|rRNA_large_subunit_pseudouridine_synthase_E	374.354	-0.202515	0.104787	-1.93262	0.0532825	0.169982	353	242	417	405	400	402	482	396	404	335	344	381
EA667_012665|tRNA_(guanosine(46)-N7)-methyltransferase_TrmB	506.684	-0.205839	0.106631	-1.93039	0.0535588	0.170763	550	381	536	522	599	585	488	462	461	502	562	485
CP039930_2449580_2449657	30.5764	0.606136	0.314042	1.93011	0.0535931	0.170773	45	26	39	32	35	38	40	23	31	21	20	25
EA667_018330|pirin_family_protein	499.666	0.185113	0.0959413	1.92944	0.0536766	0.17094	582	403	663	526	554	500	543	479	513	426	414	482
TG31307_3_167603_167699	10.1721	-0.973736	0.504782	-1.92902	0.0537282	0.171004	14	7	8	9	6	10	4	6	4	21	17	14
EA667_017935|copper_resistance_protein_CopC	14.1569	0.918631	0.476396	1.92829	0.0538186	0.171099	26	7	27	14	14	15	20	10	16	6	12	10
TG31307_3_48980_49092	7.02622	-1.30051	0.674442	-1.92828	0.0538206	0.171099	3	6	8	5	5	0	10	4	3	17	6	16
EA667_012990|aspartate_kinase	3581.44	-0.180763	0.093776	-1.9276	0.0539046	0.171267	3892	2739	3847	3664	4243	4167	3512	3009	3392	3757	3791	3335
EA667_006125|DUF2726_domain-containing_protein	22.5811	-0.694177	0.360225	-1.92707	0.0539714	0.17138	20	15	16	26	26	29	21	25	18	24	28	24
EA667_017770|2,3-bisphosphoglycerate-independent_phosphoglycerate_mutase	1163.67	-0.168572	0.0875134	-1.92624	0.0540745	0.171607	1267	887	1281	1183	1322	1316	1262	997	1054	1197	1204	1133
EA667_001530|hypothetical_protein	215.689	0.272694	0.141622	1.92551	0.0541653	0.171782	203	174	268	254	222	205	301	280	236	153	151	186
EA667_004835|pyridoxal_phosphate-dependent_aminotransferase	2195.49	-0.217378	0.112906	-1.9253	0.0541924	0.171782	2595	1759	2529	2053	2429	2233	1884	1593	2072	2604	2535	2172
CP039930_880534_880625	57.7965	-0.46934	0.243848	-1.92472	0.0542638	0.17184	66	23	48	59	66	70	74	64	66	53	56	62
EA667_015090|50S_ribosomal_protein_L25	3402.31	-0.164772	0.085626	-1.92432	0.0543141	0.17184	3428	2554	3331	3734	4249	3690	4044	3399	3231	3283	3250	3097
EA667_017010|hypothetical_protein	133.217	-0.306357	0.159207	-1.92427	0.0543207	0.17184	139	85	128	170	165	166	141	123	108	128	117	153
EA667_016370|rhodanese-like_domain-containing_protein	1770.14	-0.160851	0.0835962	-1.92415	0.0543363	0.17184	1792	1309	2333	1654	1621	1647	2048	1809	1740	1703	1716	2108
EA667_001730|hypothetical_protein	141.213	-0.304531	0.158333	-1.92336	0.0544354	0.172054	149	103	133	145	145	150	185	134	130	152	131	154
EA667_016135|SDR_family_oxidoreductase	24.0024	0.731114	0.380297	1.92248	0.0545452	0.172301	31	34	22	29	26	30	32	19	16	16	13	21
CP039930_1199013_1199192	10.9549	1.01647	0.529186	1.92083	0.0547535	0.172859	15	7	26	10	8	6	14	12	17	7	6	8
EA667_016740|zinc-binding_alcohol_dehydrogenase_family_protein	24.2577	0.706591	0.367958	1.9203	0.0548198	0.172969	32	24	29	28	26	19	29	36	24	10	22	16
EA667_009425|MFS_transporter	14.6774	-0.903871	0.470808	-1.91983	0.0548794	0.173057	8	5	20	16	15	6	21	14	19	17	16	22
EA667_007765|TetR/AcrR_family_transcriptional_regulator	31.4513	0.636797	0.33185	1.91893	0.0549929	0.173235	31	30	45	30	30	35	38	47	35	15	15	33
TG31307_2_250405_250536	25.6339	0.657549	0.342673	1.91888	0.0549992	0.173235	38	20	40	41	31	34	17	17	21	17	23	16
CP039930_1140979_1141306	5.95221	-1.36406	0.711113	-1.9182	0.0550853	0.173406	5	3	3	7	8	5	4	4	6	13	5	8
EA667_003635|polyprenyl_synthetase_family_protein	182.435	-0.26791	0.139693	-1.91785	0.0551296	0.173446	185	120	196	179	204	223	194	187	179	167	183	200
EA667_005095|RNA_polymerase-associated_protein_RapA	1824.92	-0.152371	0.0794782	-1.91714	0.0552205	0.173632	1959	1449	2230	1810	2032	1870	1890	1505	1622	1898	1967	1861
EA667_007680|acetyl-CoA_C-acetyltransferase	484.075	-0.210528	0.109897	-1.91568	0.0554062	0.174116	449	279	540	477	501	454	717	649	523	420	405	503
EA667_018745|acyltransferase	229.44	-0.273625	0.142883	-1.91503	0.055489	0.174276	255	172	226	268	236	200	233	208	246	232	249	244
EA667_000235|NAD(P)-dependent_alcohol_dehydrogenase	305.308	0.256026	0.13373	1.9145	0.0555562	0.174386	444	229	365	358	331	351	309	253	297	254	278	256
EA667_007885|hypothetical_protein	3.17728	2.02039	1.05672	1.91195	0.0558829	NA	6	4	8	3	4	4	0	2	4	0	3	1
EA667_015725|cation_transporter	54.4276	0.513896	0.269017	1.91028	0.0560976	0.175985	66	36	97	68	50	57	59	55	59	39	26	60
TG31307_2_3668268_3668378	2.51556	-2.33156	1.22062	-1.91015	0.0561144	NA	1	1	1	2	4	3	2	1	1	0	8	6
EA667_009165|SDR_family_oxidoreductase	14.7662	-0.917437	0.480434	-1.9096	0.0561847	0.176157	9	5	13	16	18	16	32	16	11	16	13	17
CP039930_2552585_2552679	6.13995	1.68061	0.880852	1.90794	0.0563988	0.176727	4	3	11	13	10	14	9	6	3	2	1	2
EA667_004265|TetR/AcrR_family_transcriptional_regulator	2.69302	2.54163	1.33251	1.9074	0.0564682	NA	3	3	7	4	4	4	5	2	0	2	0	0
EA667_005150|Lrp/AsnC_family_transcriptional_regulator	84.1767	0.379029	0.198854	1.90607	0.0566415	0.177386	84	68	113	100	89	99	117	94	81	65	56	65
EA667_005280|EAL_domain-containing_protein	181.609	-0.282469	0.148233	-1.90557	0.0567057	0.177485	164	138	168	220	194	197	209	175	203	163	185	180
CP039930_3438905_3438979	70.7617	-0.404158	0.212332	-1.90343	0.0569846	0.178256	71	39	81	83	70	76	74	73	66	63	72	94
CP039930_1989531_1989617	2.01825	-2.756	1.44871	-1.90238	0.0571219	NA	0	1	1	1	1	0	3	1	3	1	1	11
CP039930_2315152_2315520	43.0888	0.596133	0.313389	1.90222	0.0571429	0.178649	34	27	72	57	48	37	84	52	46	22	23	34
EA667_007060|50S_ribosomal_protein_L9	8632.49	-0.170778	0.0897959	-1.90184	0.0571916	0.178699	8040	5180	8362	11010	11110	9096	12539	9692	8557	7278	7241	7581
CP039930_3452497_3452596	9.15669	1.23937	0.651806	1.90144	0.0572446	0.178763	8	10	21	11	9	10	14	2	13	1	8	6
CP039930_2763334_2763419	3.91853	1.89859	0.998831	1.90081	0.0573263	NA	6	5	5	3	3	3	8	8	3	2	0	2
EA667_010735|DUF159_family_protein	63.8744	0.424486	0.22333	1.90071	0.0573397	0.178957	82	47	82	65	79	57	80	74	74	41	46	56
TG31307_2_3014980_3015263	3.65905	1.93282	1.0177	1.8992	0.0575376	NA	4	7	5	5	5	3	5	5	1	1	2	1
EA667_017355|HlyD_family_secretion_protein	24.6859	-0.696423	0.367269	-1.89622	0.0579307	0.180699	25	13	22	24	32	13	36	21	25	38	26	24
CP039930_3636539_3636869	53.7117	-0.520595	0.274811	-1.89437	0.0581754	0.181311	49	38	30	71	47	46	65	66	77	44	53	60
CP039930_1906543_1906657	55.2262	-0.487602	0.257413	-1.89424	0.0581932	0.181311	44	48	59	50	46	51	59	38	69	80	54	62
CP039930_898227_898305	63.5555	0.500443	0.264364	1.89301	0.0583563	0.181715	104	81	74	54	39	72	45	51	67	68	53	50
EA667_016255|DUF3298_domain-containing_protein	325.796	0.244352	0.129116	1.8925	0.058424	0.181823	397	294	496	298	295	331	296	300	331	274	268	374
CP039930_2944969_2945147	62.0153	0.442034	0.233663	1.89176	0.0585232	0.182028	70	45	68	73	95	66	84	68	70	37	44	42
EA667_016055|nickel_resistance_MFS_transporter_NreB	27.716	-0.699124	0.369991	-1.88957	0.0588158	0.182834	12	16	47	22	16	27	35	29	23	41	26	42
EA667_008075|hypothetical_protein	18.858	0.755336	0.399947	1.88859	0.0589466	0.183136	26	19	25	17	17	25	19	22	21	13	15	10
EA667_014180|Fe-S_biogenesis_protein_NfuA	291.428	0.228213	0.120899	1.88763	0.0590754	0.183432	329	202	341	358	369	320	379	294	304	226	230	220
EA667_005375|metal-dependent_hydrolase	1.447	-3.17164	1.68046	-1.88736	0.0591119	NA	1	0	0	0	0	2	1	4	0	4	2	3
EA667_006775|class_I_SAM-dependent_methyltransferase	26.9759	0.670644	0.355485	1.88656	0.05922	0.183777	52	28	55	18	30	21	8	17	22	36	23	17
EA667_011085|hypothetical_protein	752.899	0.193435	0.102663	1.88418	0.0595408	0.184662	795	722	1068	737	850	753	725	739	649	658	692	732
CP039930_3263442_3263799	100.529	0.361598	0.191937	1.88394	0.0595729	0.184662	99	82	126	119	105	98	137	109	133	81	57	81
EA667_005775|hypothetical_protein	236.915	0.254083	0.134936	1.883	0.0597008	0.184954	283	222	336	182	253	247	236	234	232	226	198	222
EA667_014890|metal-dependent_hydrolase	6.71006	-1.32408	0.703952	-1.88093	0.0599819	0.185651	4	4	4	8	6	10	10	3	4	3	12	13
CP039930_3084647_3084817	11.1971	1.07951	0.573954	1.88084	0.0599938	0.185651	12	7	19	15	13	14	23	10	11	8	6	2
EA667_017145|polyribonucleotide_nucleotidyltransferase	4213.07	-0.145279	0.0772564	-1.88048	0.0600421	0.185696	4177	3088	4572	4663	5019	4207	5271	4243	3979	3863	4059	4082
EA667_004560|class_1_fructose-bisphosphatase	1220.74	-0.174676	0.0929162	-1.87993	0.0601176	0.185824	1261	916	1341	1251	1507	1401	1222	1053	1209	1215	1247	1174
EA667_017320|DMT_family_transporter	83.2557	-0.35822	0.190708	-1.87836	0.0603313	0.186258	81	64	84	102	101	90	84	62	69	91	82	97
EA667_005650|class_C_beta-lactamase_ADC-152	17184.9	0.126651	0.0674275	1.87833	0.060336	0.186258	20512	12817	19766	18563	20141	20119	19146	17030	17124	14679	14213	15446
CP039932_7594_8578	7.75305	-1.18782	0.63252	-1.87791	0.0603928	0.186258	7	1	9	3	9	7	7	6	11	15	8	11
CP039930_3099408_3099557	8.05617	-1.18263	0.629758	-1.87791	0.0603941	0.186258	4	9	4	2	7	4	14	7	6	16	13	8
EA667_016295|ketol-acid_reductoisomerase	2251.48	-0.177027	0.0943008	-1.87725	0.0604832	0.186427	2514	1502	2240	2500	2801	2687	2513	2049	2153	2193	2250	1992
EA667_004615|deoxyguanosinetriphosphate_triphosphohydrolase	140.765	-0.301691	0.160994	-1.87393	0.0609407	0.187732	141	93	158	151	152	147	184	115	132	126	154	160
CP039930_1870646_1870781	0.95912	-3.56239	1.90178	-1.87318	0.0610429	NA	0	0	0	0	1	1	0	0	3	2	3	1
EA667_019820|hypothetical_protein	337.009	0.228911	0.122214	1.87304	0.0610631	0.188003	349	236	485	355	359	357	446	394	328	275	254	295
EA667_004875|MFS_transporter	59.028	0.448266	0.239679	1.87028	0.0614449	0.189072	67	60	78	66	68	56	59	57	66	51	31	57
EA667_015160|elongation_factor_P_hydroxylase	1626.27	-0.151866	0.0812254	-1.86968	0.0615279	0.18915	1557	1137	1909	1736	1725	1657	2095	1804	1520	1539	1492	1627
EA667_008480|transcriptional_regulator	27.5855	-0.590802	0.316005	-1.8696	0.0615393	0.18915	31	17	42	13	19	14	34	22	19	31	43	48
EA667_014235|MFS_transporter	4.5765	-1.77151	0.948017	-1.86865	0.0616714	NA	3	2	1	1	6	3	9	11	0	7	7	5
EA667_009540|GNAT_family_N-acetyltransferase	8.80357	-1.14678	0.61461	-1.86587	0.0620593	0.190641	6	3	16	7	2	0	7	7	9	10	12	27
EA667_015470|NADH-quinone_oxidoreductase_subunit_NuoF	3787.59	-0.156229	0.0837988	-1.86434	0.0622742	0.191176	4206	2460	3937	4281	4570	4268	4391	3609	3707	3720	3564	3429
EA667_003625|amino_acid_permease	1181.06	-0.139479	0.0748228	-1.86413	0.0623037	0.191176	1151	787	1311	1325	1359	1337	1401	1213	1249	1037	1071	1151
CP039930_754858_755054	31.9947	0.628564	0.337316	1.86343	0.0624025	0.19118	42	14	47	33	34	35	47	37	49	26	16	17
EA667_009985|AraC_family_transcriptional_regulator	44.6697	0.536408	0.287948	1.86287	0.0624811	0.19118	62	45	41	68	51	46	55	44	36	38	24	33
TG31307_3_114627_114727	14.6106	-0.814915	0.437454	-1.86286	0.0624819	0.19118	13	7	20	13	8	10	14	18	10	16	26	21
EA667_006540|DUF423_domain-containing_protein	292.281	-0.219591	0.117884	-1.86277	0.0624952	0.19118	303	223	311	294	287	338	309	296	280	292	284	319
EA667_010750|ABC_transporter_permease	59.5662	-0.421555	0.22632	-1.86265	0.0625113	0.19118	56	33	56	65	76	70	74	61	59	56	52	69
EA667_015345|methionine--tRNA_ligase	1495.8	-0.159131	0.0854334	-1.86263	0.0625148	0.19118	1632	1156	1768	1487	1659	1596	1523	1239	1406	1630	1522	1493
EA667_014085|lysine--tRNA_ligase	2522.37	-0.156083	0.0838271	-1.86197	0.0626078	0.191233	2667	1973	2801	2715	3066	2836	2486	2155	2245	2593	2643	2368
CP039930_2058548_2058623	36.1859	0.536816	0.288331	1.8618	0.062631	0.191233	42	39	46	38	48	44	42	31	29	30	23	28
EA667_008150|hypothetical_protein	7.61965	1.20611	0.647862	1.86167	0.0626493	0.191233	12	8	10	11	8	8	6	8	10	3	3	6
EA667_003430|nitroreductase	166.484	0.299003	0.160624	1.86151	0.062672	0.191233	225	179	179	182	165	157	174	150	153	151	135	156
EA667_007625|MgtC/SapB_family_protein	22.4625	-0.662371	0.356018	-1.8605	0.0628148	0.191562	17	22	22	19	19	21	18	17	21	24	37	29
EA667_007545|TonB-dependent_receptor	143.879	0.374468	0.201374	1.85957	0.0629464	0.191857	204	89	125	178	185	183	237	147	134	95	99	99
EA667_008155|hypothetical_protein	9.70849	-1.01606	0.547026	-1.85742	0.0632509	0.192678	6	3	15	11	5	7	12	7	9	14	12	17
EA667_002795|hypothetical_protein	326.611	-0.228075	0.122825	-1.8569	0.0633249	0.192795	308	239	386	316	418	361	359	303	279	344	344	308
CP039930_787126_788080	2125.36	0.140859	0.0758836	1.85625	0.0634174	0.192969	2457	1775	2700	2210	2476	2140	2288	1992	2042	1958	1913	1876
CP039930_1223262_1223323	4.37887	2.03109	1.09424	1.85617	0.06343	NA	2	9	10	10	0	5	7	5	0	0	1	4
CP039930_2968197_2968283	82.2425	-0.385754	0.207923	-1.85527	0.0635573	0.193288	92	47	78	88	96	113	99	63	69	84	94	79
EA667_009145|IacB_protein	3.83423	1.87466	1.01052	1.85513	0.0635774	NA	4	5	7	3	3	8	6	3	4	2	2	0
TG31307_2_350416_350481	14.2285	-0.878629	0.473681	-1.85489	0.0636112	0.193344	16	9	8	12	15	17	11	9	17	26	11	19
EA667_016320|leucine--tRNA_ligase	1838.35	-0.154995	0.0835844	-1.85436	0.0636883	0.193471	1981	1326	1934	2031	2180	1991	2090	1760	1702	1780	1874	1678
EA667_016265|peptide_chain_release_factor_3	931.873	-0.164066	0.0885086	-1.85367	0.0637867	0.193592	967	647	1022	979	1121	1029	1082	881	915	897	938	854
EA667_012475|hypothetical_protein	16.5411	-0.822126	0.443533	-1.85358	0.0637989	0.193592	11	6	15	16	20	22	14	23	23	16	18	17
CP039930_471232_471419	8.23304	1.15822	0.625097	1.85287	0.0639011	0.193794	11	13	9	9	7	13	11	7	5	4	6	4
EA667_019375|arsenate_reductase_(glutaredoxin)	5.12838	1.45303	0.785115	1.85073	0.0642087	0.194619	8	6	10	2	5	7	7	4	6	4	1	3
EA667_001700|O-antigen_ligase_family_protein	8.6658	1.10611	0.598021	1.84962	0.0643681	0.194994	18	7	13	5	11	7	10	10	10	2	6	8
TG31307_2_72205_72617	34.2837	0.554388	0.299806	1.84915	0.0644355	0.19509	53	27	50	36	28	48	37	29	32	29	26	25
CP039930_3829074_3829131	4.17256	1.9296	1.04447	1.84745	0.0646823	NA	1	4	12	8	1	5	6	6	5	1	1	2
EA667_013430|YraN_family_protein	4.22638	1.65252	0.895663	1.84502	0.0650341	NA	5	4	12	5	5	2	6	4	4	0	2	4
CP039930_94945_95031	210.764	-0.251797	0.136499	-1.84468	0.0650848	0.196947	190	129	222	234	273	230	277	238	196	180	184	223
CP039930_2619254_2619318	9.98237	1.15027	0.623972	1.84347	0.0652609	0.197319	7	18	14	9	9	6	24	8	8	8	2	7
CP039930_3266244_3266313	42.0691	-0.599788	0.325382	-1.84334	0.0652797	0.197319	38	19	44	46	40	39	40	46	60	58	56	22
CP039931_48715_48784	1.57732	3.024	1.64238	1.84123	0.0655875	NA	3	4	2	3	1	1	4	0	0	0	0	1
CP039930_1491031_1491221	32.3899	-0.556263	0.302169	-1.8409	0.0656362	0.198287	28	21	29	34	40	40	28	32	34	40	32	33
EA667_001655|3-dehydroquinate_synthase	701.121	-0.164054	0.0891484	-1.84023	0.065734	0.198472	706	531	789	703	765	736	837	712	647	723	658	698
CP039930_2439158_2439324	10.8589	1.02177	0.555592	1.83906	0.0659067	0.198843	17	6	28	8	9	17	17	6	7	6	7	9
EA667_011785|hypothetical_protein	183.371	0.260663	0.141749	1.8389	0.0659295	0.198843	202	132	247	206	192	196	249	206	178	141	138	161
EA667_006390|PLP-dependent_aminotransferase_family_protein	23.0766	0.668181	0.363506	1.83816	0.0660394	0.199065	31	21	35	15	23	23	29	27	28	20	9	21
TG31307_3_112768_112836	12.2055	-0.999257	0.543735	-1.83777	0.066097	0.199129	9	8	11	12	2	13	8	17	13	23	19	9
CP039930_3785225_3785378	293.524	0.217535	0.118626	1.83379	0.0666847	0.200667	329	268	345	324	331	337	341	281	262	232	246	270
EA667_017480|alpha/beta_fold_hydrolase	107.916	0.342135	0.18659	1.83362	0.0667104	0.200667	120	81	138	122	125	112	123	122	133	58	86	100
CP039930_2044680_2044982	13.3773	0.899099	0.490354	1.83357	0.0667179	0.200667	17	14	22	9	19	23	14	6	14	9	8	9
CP039930_3531896_3532046	10.6456	1.13936	0.621671	1.83274	0.0668419	0.200893	10	5	20	10	14	13	8	15	23	7	3	4
EA667_011130|FxsA_family_protein	618.486	-0.392682	0.214279	-1.83257	0.0668663	0.200893	510	327	712	571	510	663	913	894	627	529	487	817
CP039930_2649814_2650083	235.908	-0.251393	0.137226	-1.83196	0.0669567	0.20097	242	133	263	286	310	261	254	246	204	227	193	267
EA667_004470|phosphoribosylglycinamide_formyltransferase	583.724	-0.209103	0.114145	-1.83191	0.0669656	0.20097	569	414	594	700	763	614	679	548	544	592	591	484
CP039930_3793477_3793535	3.92806	1.95703	1.06879	1.83107	0.0670905	NA	9	1	8	2	4	4	1	4	12	2	1	1
TG31307_2_3650769_3651021	5.8572	1.33317	0.728345	1.83041	0.0671883	0.201528	4	7	20	7	9	9	3	2	1	3	4	4
EA667_013330|M48_family_metallopeptidase	49.7465	0.483813	0.264435	1.82961	0.067308	0.201777	73	45	53	60	56	51	57	60	39	32	30	51
EA667_002380|rhombosortase	61.67	0.433089	0.237167	1.82609	0.067836	0.203248	68	58	76	73	57	57	63	74	83	40	47	51
EA667_014015|urease_accessory_protein_UreD	8.07024	-1.12096	0.614171	-1.82516	0.0679767	0.203558	6	2	9	7	3	7	12	8	11	13	6	14
EA667_007540|TetR/AcrR_family_transcriptional_regulator	3.225	2.08805	1.14494	1.82373	0.0681934	NA	2	4	8	1	4	5	6	3	4	0	2	1
EA667_012775|alanine--tRNA_ligase	2728.82	-0.172443	0.0946561	-1.82179	0.0684872	0.204974	2957	2122	2816	2977	3286	2991	2798	2421	2478	2803	2924	2451
EA667_005865|hypothetical_protein	346.65	0.211633	0.116191	1.82142	0.0685431	0.205027	355	310	404	378	386	374	398	390	360	275	259	320
EA667_009670|SDR_family_oxidoreductase	14.349	-0.800063	0.439315	-1.82116	0.0685825	0.205027	10	9	23	12	13	10	6	10	13	19	20	27
EA667_012085|ABC_transporter_permease	8.73896	1.2301	0.675534	1.82093	0.0686173	0.205027	10	5	14	14	6	12	7	18	11	5	4	2
EA667_005785|hypothetical_protein	205.807	-0.243999	0.134118	-1.81929	0.0688679	0.205634	214	162	208	216	213	225	225	206	182	223	188	226
EA667_006095|peptide_MFS_transporter	152.377	0.276106	0.151782	1.8191	0.0688955	0.205634	188	121	183	166	159	155	178	159	176	134	110	127
CP039930_1778724_1779952	12.8951	-0.853448	0.469269	-1.81868	0.068961	0.205717	15	6	17	6	7	12	8	13	9	28	19	14
EA667_004440|lipoprotein-releasing_ABC_transporter_permease_subunit	452.206	-0.211052	0.116299	-1.81474	0.0695634	0.207401	483	389	548	451	462	438	434	323	408	499	544	466
EA667_006780|glycosyltransferase	20.907	0.671855	0.370688	1.81246	0.0699156	0.208337	33	28	39	20	16	30	6	10	12	16	16	26
EA667_004670|7-carboxy-7-deazaguanine_synthase_QueE	985.843	-0.164617	0.0908961	-1.81105	0.0701337	0.208866	1060	739	1074	1058	1158	1013	1110	899	900	994	1028	923
EA667_007150|hypothetical_protein	13.9188	0.840269	0.464063	1.81068	0.0701906	0.208866	23	13	21	19	12	23	13	10	8	12	6	11
CP039930_1788302_1788427	15.2989	-0.791235	0.437009	-1.81057	0.0702077	0.208866	10	9	22	7	15	18	18	11	11	23	18	23
EA667_008275|DUF159_family_protein	18.619	-0.727955	0.402137	-1.81022	0.0702623	0.208915	19	12	16	11	11	19	26	18	20	20	33	18
EA667_016900|glutathione_S-transferase_family_protein	56.4369	-0.45191	0.249703	-1.80979	0.0703289	0.208999	72	22	60	56	48	63	66	54	60	66	56	66
CP039930_3462193_3462382	32.1836	0.551316	0.304764	1.80899	0.0704521	0.209252	41	41	42	44	34	30	31	23	23	26	23	30
CP039930_3652706_3652781	7.77571	-1.22666	0.67853	-1.80783	0.0706337	0.209677	6	1	6	2	9	14	10	9	11	8	10	9
EA667_000685|SCP-2_sterol_transfer_family_protein	1366.51	0.149044	0.0824688	1.80728	0.0707184	0.209768	1536	1107	1883	1383	1483	1480	1377	1325	1337	1279	1144	1291
EA667_006345|multidrug_efflux_RND_transporter_periplasmic_adaptor_subunit_AdeF	6.56728	1.30991	0.724856	1.80714	0.070741	0.209768	12	10	10	4	2	6	9	10	4	9	0	3
TG31307_3_22546_22627	5.75047	-1.35332	0.749296	-1.80612	0.0708999	0.210125	8	2	3	0	5	2	3	10	5	14	6	10
CP039930_904259_904748	189.992	0.268015	0.148569	1.80397	0.0712354	0.211005	225	143	218	236	198	208	215	235	196	131	164	149
EA667_012700|bifunctional_23S_rRNA_(guanine(2069)-N(7))-methyltransferase_RlmK/23S_rRNA_(guanine(2445)-N(2))-methyltransferase_RlmL	509.958	-0.178084	0.0987689	-1.80304	0.0713824	0.21125	530	358	583	551	569	526	600	492	474	499	534	481
EA667_010645|IscS_subfamily_cysteine_desulfurase	1724.03	0.162116	0.0899166	1.80295	0.0713954	0.21125	2119	1377	1937	1880	2059	1831	2024	1621	1695	1531	1500	1412
EA667_011335|hypothetical_protein	3.43517	-1.83784	1.01947	-1.80275	0.0714281	NA	0	1	4	2	5	3	8	1	2	6	4	6
EA667_000965|hypothetical_protein	30.0548	0.581447	0.322687	1.8019	0.0715618	0.211628	36	27	45	37	28	39	42	23	26	20	18	28
CP039931_82764_82962	11.7576	1.01368	0.56269	1.8015	0.0716248	0.211665	17	11	9	20	13	8	21	16	12	5	7	5
TG31307_3_138804_139216	7.20804	-1.27841	0.709708	-1.80132	0.0716519	0.211665	3	2	5	8	12	14	4	10	8	7	6	9
EA667_010120|DUF971_domain-containing_protein	3.58647	1.88521	1.04664	1.8012	0.0716721	NA	6	5	5	3	6	5	5	5	0	3	1	0
EA667_016840|3-isopropylmalate_dehydratase_large_subunit	91.693	-0.330214	0.183519	-1.79935	0.0719641	0.212285	87	68	95	85	104	93	104	88	96	101	95	92
EA667_007390|UDP-2,3-diacylglucosamine_diphosphatase	154.699	-0.272147	0.15125	-1.79931	0.0719689	0.212285	161	111	174	157	173	137	158	152	157	182	153	156
CP039930_282935_283029	18.7284	-0.705501	0.392107	-1.79926	0.0719782	0.212285	18	9	19	25	17	20	23	13	16	19	21	28
EA667_011005|cupin	299.973	-0.239681	0.133275	-1.7984	0.0721143	0.212572	339	242	304	307	370	291	289	245	270	320	352	289
EA667_003655|patatin-like_phospholipase_family_protein	291.426	-0.229414	0.127604	-1.79786	0.0721996	0.212709	321	209	315	293	346	316	300	260	268	325	318	259
CP039930_2566640_2566795	35.6031	0.518009	0.288222	1.79726	0.0722945	0.212874	43	34	63	30	28	41	45	30	32	28	26	35
CP039930_3631129_3631237	152.6	-0.266381	0.148361	-1.79549	0.0725756	0.213586	147	121	159	162	170	140	170	156	146	154	149	170
CP039930_1820771_1821008	2.44096	-2.10188	1.17241	-1.79278	0.0730076	NA	2	0	2	6	0	1	1	1	1	7	4	4
TG31307_2_3505820_3506034	42.7554	0.484879	0.270519	1.7924	0.0730684	0.214921	49	42	66	34	39	52	44	47	44	32	27	44
EA667_013540|hypothetical_protein	11.1549	1.01138	0.564361	1.79207	0.0731214	0.214961	20	11	15	5	12	20	11	16	6	4	6	11
CP039930_601036_601244	801.584	-0.161675	0.0902355	-1.7917	0.0731805	0.215019	849	602	1036	783	900	770	830	689	734	835	858	834
EA667_008120|hypothetical_protein	8.91499	-1.11199	0.620941	-1.79082	0.0733227	0.215275	4	7	11	9	9	0	8	10	4	17	8	19
EA667_005025|PhzF_family_phenazine_biosynthesis_protein	76.9538	0.361274	0.201753	1.79067	0.0733461	0.215275	88	75	101	69	88	87	94	74	70	67	60	62
CP039930_1790521_1791128	3.74364	-1.49794	0.837274	-1.78907	0.0736037	NA	3	2	4	2	1	2	3	3	1	12	4	7
EA667_007500|glutathione_S-transferase_family_protein	29.1036	0.610964	0.341575	1.78866	0.0736688	0.216106	45	19	53	27	22	37	41	24	24	19	30	19
CP039930_3795406_3795621	11.1532	-0.951148	0.53207	-1.78764	0.0738348	0.216477	13	5	8	15	10	6	11	14	7	10	12	24
EA667_006275|lytic_murein_transglycosylase_B	342.992	-0.230627	0.129046	-1.78717	0.0739103	0.216582	383	323	393	322	358	319	259	265	291	425	402	366
EA667_000015|DNA_replication/repair_protein_RecF	760.286	-0.1615	0.0903985	-1.78653	0.0740136	0.216768	754	607	844	803	864	783	827	714	737	764	758	746
EA667_007785|hypothetical_protein	11.1886	0.969123	0.542608	1.78605	0.0740919	0.21684	25	7	14	16	11	12	9	12	11	11	5	5
EA667_001020|peptide_chain_release_factor_2	1217.81	-0.147898	0.0828205	-1.78577	0.074137	0.21684	1285	878	1359	1333	1393	1287	1380	1147	1171	1215	1218	1124
EA667_003295|DUF1508_domain-containing_protein	243.32	-0.229152	0.12833	-1.78564	0.0741571	0.21684	247	167	243	232	250	263	309	266	272	237	199	270
EA667_016925|Rne/Rng_family_ribonuclease	1848.36	-0.185634	0.103995	-1.78503	0.0742557	0.216984	1851	1059	1797	2173	2269	1815	2774	2172	1874	1558	1483	1816
CP039930_31773_32086	129.728	0.303147	0.169845	1.78485	0.0742856	0.216984	140	108	180	171	141	139	142	132	114	92	123	101
CP039930_3862315_3862650	381.005	0.197173	0.110615	1.78252	0.0746648	0.217975	440	274	455	412	442	478	465	420	349	305	308	314
TG31307_2_3111212_3111814	4.10548	1.68427	0.945479	1.7814	0.0748476	NA	4	7	6	6	4	1	4	7	5	2	2	1
EA667_019060|UDP-N-acetylmuramate:L-alanyl-gamma-D-glutamyl-_meso-diaminopimelate_ligase	434.442	-0.191006	0.107239	-1.78111	0.0748938	0.218527	453	347	463	452	447	497	469	398	400	429	466	431
EA667_018910|TetR_family_transcriptional_regulator	167.662	-0.286863	0.161111	-1.78053	0.0749896	0.21869	130	97	202	168	210	162	206	196	202	146	144	184
CP039930_3086329_3086713	279.847	0.229787	0.129185	1.77875	0.075281	0.219423	341	258	383	238	288	300	262	273	278	273	256	237
CP039930_1609656_1609829	8.58987	1.02992	0.579116	1.77843	0.0753338	0.219459	10	10	18	6	9	9	9	8	9	3	7	7
EA667_016525|ATP-dependent_Clp_protease_ATP-binding_subunit_ClpX	2623.35	-0.132472	0.0745162	-1.77776	0.0754428	0.21966	2742	1811	3032	2668	2705	2790	3340	2815	2478	2434	2359	2775
EA667_000470|phosphoglucosamine_mutase	106.426	-0.318585	0.179252	-1.7773	0.0755182	0.219762	108	61	109	102	105	106	130	148	111	93	104	118
EA667_009495|MFS_transporter	7.73996	-1.17839	0.663211	-1.7768	0.0756019	0.219889	6	3	5	13	5	8	10	9	6	12	3	14
CP039930_2828648_2828716	4.28843	1.58482	0.893782	1.77316	0.0762021	NA	5	7	7	6	4	4	5	6	2	2	0	4
EA667_016140|bifunctional_(p)ppGpp_synthetase/guanosine-3',5'-bis(diphosphate)_3'-pyrophosphohydrolase	3123.32	0.112277	0.0633248	1.77303	0.0762234	0.221579	3462	2489	3979	3261	3423	3262	3524	3097	3121	2664	2805	2917
EA667_004795|SDR_family_oxidoreductase	222.158	-0.231083	0.130387	-1.77229	0.0763462	0.221818	224	157	274	214	223	256	221	204	221	226	234	239
EA667_011540|PaaI_family_thioesterase	7.9202	1.09452	0.618496	1.76966	0.0767844	0.222972	9	11	12	6	11	10	8	8	7	3	5	6
EA667_017700|putative_lipid_II_flippase_FtsW	530.897	-0.195987	0.110781	-1.76914	0.0768701	0.223103	599	341	603	564	592	636	541	468	516	553	553	490
EA667_007135|flavoprotein	32.6993	0.57577	0.325553	1.76859	0.0769626	0.223253	35	22	43	45	37	32	42	49	37	13	20	28
EA667_002505|tRNA_(N6-isopentenyl_adenosine(37)-C2)-methylthiotransferase_MiaB	1192.87	-0.151139	0.0854895	-1.76792	0.0770744	0.223459	1292	851	1307	1286	1442	1258	1346	1097	1125	1124	1232	1137
EA667_010320|hypothetical_protein	265.25	0.242648	0.137293	1.76737	0.0771656	0.223539	276	266	378	265	244	272	299	254	239	268	205	244
TG31307_2_3477639_3477948	12.5699	0.915905	0.518261	1.76726	0.0771839	0.223539	15	13	22	15	12	17	18	6	12	13	8	3
EA667_017385|CDP-diacylglycerol--glycerol-3-phosphate_3-phosphatidyltransferase	182.544	-0.261556	0.148193	-1.76497	0.0775693	0.224536	167	103	223	189	189	172	254	222	179	179	162	192
TG31307_2_3555029_3555138	12.2897	0.889925	0.50433	1.76457	0.0776365	0.224612	12	14	20	17	11	13	15	12	13	5	6	12
EA667_016920|hypothetical_protein	403.927	-0.194066	0.110039	-1.76362	0.0777957	0.224953	387	265	414	485	427	424	548	450	409	357	341	417
CP039930_2047869_2048301	155.561	0.272496	0.154675	1.76174	0.0781137	0.225667	188	126	224	154	160	157	176	172	136	159	116	129
EA667_016520|DUF2846_domain-containing_protein	112.117	0.341073	0.193608	1.76167	0.0781249	0.225667	131	65	145	135	122	96	146	159	138	88	65	89
EA667_000830|2-oxo-4-hydroxy-4-carboxy-5-ureidoimidazoline_decarboxylase	3.57871	1.80704	1.02588	1.76144	0.0781635	NA	4	8	6	7	0	3	1	4	4	1	1	3
CP039931_83826_84101	43.2636	0.497388	0.282627	1.75988	0.0784288	0.226371	46	43	68	32	32	48	47	41	65	31	33	38
TG31307_2_78191_78669	5.86518	-1.39902	0.795017	-1.75974	0.0784516	0.226371	5	0	5	4	6	6	9	13	1	10	6	7
EA667_004850|hypothetical_protein	178.755	0.300996	0.1711	1.75918	0.0785471	0.226527	156	142	232	216	189	188	281	225	168	121	110	164
CP039930_1432748_1433475	6.31762	1.33458	0.759372	1.75748	0.0788359	0.22724	8	4	17	6	4	9	7	9	5	8	1	1
TG31307_2_3449676_3449780	3381.29	-0.11759	0.0669419	-1.7566	0.0789867	0.227555	3547	2506	3782	3684	3729	3406	3925	3458	3260	3202	3281	3276
CP039930_1568302_1568528	5.8763	1.30449	0.742962	1.75579	0.0791235	0.227714	15	6	6	7	3	7	8	7	3	2	5	3
EA667_002510|lytic_transglycosylase_domain-containing_protein	649.83	0.160075	0.0911751	1.75568	0.0791425	0.227714	847	556	939	614	655	663	577	549	580	645	608	652
EA667_005080|glutamate-1-semialdehyde_2,1-aminomutase	913.176	-0.144031	0.0820485	-1.75544	0.0791848	0.227714	936	670	1013	1040	1029	1009	1063	845	846	859	888	900
EA667_007735|low_molecular_weight_phosphotyrosine_protein_phosphatase	149.223	-0.274936	0.156632	-1.7553	0.0792086	0.227714	144	103	160	144	189	129	169	159	163	142	150	158
EA667_003960|2-oxoglutarate_dehydrogenase_E1_component	15731.4	0.142645	0.0813212	1.75409	0.0794143	0.228086	18647	12930	18343	17242	19117	17960	16574	13693	15306	14196	14066	13178
CP039930_160290_160342	6.10754	-1.26936	0.723671	-1.75405	0.0794212	0.228086	5	2	3	4	5	6	10	10	7	9	4	9
TG31307_2_3311152_3311593	2.96514	2.08998	1.19159	1.75395	0.0794387	NA	9	2	3	6	4	3	1	2	4	0	0	3
EA667_004040|transcription_elongation_factor_GreA	1289.62	-0.13049	0.0744639	-1.7524	0.0797051	0.228781	1378	949	1442	1427	1398	1354	1415	1261	1258	1266	1215	1290
EA667_006010|hypothetical_protein	5.90655	1.53263	0.874712	1.75215	0.0797472	0.228782	13	3	3	6	14	7	8	7	7	2	0	4
EA667_009255|dihydroxy-acid_dehydratase	5.16757	-1.27599	0.728852	-1.75069	0.0799999	0.229386	2	4	6	2	2	3	4	6	5	8	5	14
EA667_010695|Dyp-type_peroxidase	323.731	-0.205859	0.117614	-1.7503	0.0800664	0.229429	326	241	389	375	344	356	359	275	259	362	303	341
CP039930_104987_105121	15.4632	-0.757361	0.432767	-1.75005	0.0801105	0.229429	17	8	17	14	19	9	10	13	15	15	28	21
EA667_003940|succinate_dehydrogenase_flavoprotein_subunit	7128.09	0.141752	0.0810073	1.74987	0.0801406	0.229429	8304	4867	7958	8526	9129	8236	8893	7130	6892	5854	5841	5654
EA667_018925|bifunctional_riboflavin_kinase/FAD_synthetase	591.27	-0.165996	0.0948828	-1.74949	0.0802068	0.229489	605	361	627	654	700	658	720	629	641	510	505	609
EA667_005005|hypothetical_protein	3.84225	1.88404	1.07713	1.74913	0.0802689	NA	4	4	13	2	6	3	11	0	1	4	0	1
EA667_014490|DUF3304_domain-containing_protein	191.6	-0.290829	0.166276	-1.74907	0.0802794	0.229489	177	113	185	237	230	159	277	220	210	203	177	147
EA667_001960|succinylglutamate_desuccinylase	166.229	0.302674	0.173054	1.74902	0.0802877	0.229489	192	90	168	210	248	166	254	211	185	109	112	108
EA667_004555|RNA_methyltransferase	295.934	-0.220537	0.12612	-1.74863	0.080355	0.229562	300	231	332	330	385	304	260	260	256	299	337	285
CP039930_980765_980845	3.08686	-1.71964	0.983736	-1.74807	0.080452	NA	0	2	4	1	1	1	3	2	4	10	3	5
EA667_000780|hypothetical_protein	44.5828	0.437901	0.250703	1.74669	0.0806906	0.2304	71	38	80	31	42	33	46	44	34	37	39	50
EA667_004945|hypothetical_protein	77.7101	0.367935	0.210701	1.74624	0.0807684	0.230502	96	57	115	81	85	93	72	85	79	70	66	51
EA667_015030|23S_rRNA_pseudouridine(1911/1915/1917)_synthase_RluD	553.195	-0.173372	0.0993861	-1.74443	0.0810844	0.231256	569	404	669	627	553	585	574	542	501	598	523	565
EA667_016905|YafY_family_transcriptional_regulator	38.73	-0.505384	0.28975	-1.74421	0.0811224	0.231256	35	26	40	39	44	35	53	24	42	52	35	44
EA667_016735|winged_helix-turn-helix_transcriptional_regulator	27.496	0.584844	0.335347	1.744	0.0811597	0.231256	39	23	40	25	35	27	30	22	34	14	20	28
EA667_007825|DUF2303_family_protein	35.5868	0.522366	0.299984	1.74131	0.0816288	0.232396	34	35	46	38	37	43	42	49	35	25	20	29
EA667_003225|large_conductance_mechanosensitive_channel_protein_MscL	217.28	0.236364	0.135764	1.74099	0.0816845	0.232396	262	174	267	240	285	220	225	222	210	158	177	211
EA667_019540|PACE_efflux_transporter	6.94013	1.33991	0.769722	1.74078	0.0817228	0.232396	5	10	6	8	6	10	13	13	5	1	3	4
EA667_004935|cellulose_biosynthesis_cyclic_di-GMP-binding_regulatory_protein_BcsB	144.693	0.297206	0.170736	1.74074	0.0817296	0.232396	179	116	235	125	158	161	149	101	154	131	127	131
TG31307_2_3451454_3451610	580.492	-0.178542	0.102621	-1.73983	0.0818896	0.23273	639	416	601	616	646	565	701	629	520	571	587	555
CP039930_1717887_1718122	58.4199	0.457001	0.262859	1.73858	0.0821091	0.233233	80	53	56	68	60	53	87	80	47	39	53	35
TG31307_2_3398620_3399144	349.483	-0.212134	0.122122	-1.73707	0.0823754	0.233867	377	259	375	384	370	433	322	283	355	356	340	377
EA667_008655|quinoprotein_glucose_dehydrogenase	573.059	-0.178642	0.102879	-1.73643	0.0824882	0.234066	620	413	717	548	505	607	616	572	551	546	563	694
EA667_019065|low_temperature_requirement_protein_A	69.6897	0.388404	0.223854	1.73508	0.0827275	0.234555	86	50	79	85	82	89	68	80	84	44	44	62
EA667_019205|LLM_class_flavin-dependent_oxidoreductase	6.21432	1.17769	0.678881	1.73476	0.082784	0.234555	11	6	13	5	8	6	6	7	3	2	4	6
[truncated: 4,626 more rows]
